# Supplementary material for: Epigenetic silencing of a multifunctional plant stress regulator
Source: eLife journal article supplement (doi:10.7554/elife.47835), 2019-08-16
Supplement: supp [file elife-47835-supp-v1.zip]

**A** *Ler EEN::GUS*

**B** *Col-0 35S::GFP-EEN*

**C**

**D**

| INO80 complex subunits | AGI code  | mass (kDa) | control matched peptides IP1/IP2 | αFLAG matched peptides IP1/IP2 |
|------------------------|-----------|------------|----------------------------------|--------------------------------|
| <b>EEN</b>             | AT4G38495 | 14.3       | 0/0                              | 5/69                           |
| ARP5                   | AT3G12380 | 83.7       | 0/0                              | 13/543                         |
| RVB2.1                 | AT5G67630 | 52.1       | 0/0                              | 2/8                            |

**E**

**F**

**G**

**H**

**I**

**J**

**K**

**K**
