# Supplementary material for: Epigenetic silencing of a multifunctional plant stress regulator
Source: eLife. 2019 Aug 16;8:e47835. doi: 10.7554/eLife.47835 (PMC6739875; doi:10.7554/eLife.47835)
Supplement: Supplementary file 1. — Tables displaying differentially regulated ET genes in Ler, ein6-1, een-1, ein6-1 een-1 and ein2-45 seedlings. Differentially expressed genes were discovered with edgeR. [file elife-47835-supp1.xlsx]

## Sheet: ET-induced
Supplementary File 1: Differentially expressed genes in Ler, ein6-1, een-1 and ein6-1 een-1 seedlings in response to ET
edgeR Ler air vs Ler 4h ET
ET-induced genes
GeneID	logFC	logCPM	F	PValue	FDR
AT2G44070	7.59694	0.313055	50.3403	1.31e-12	8.47e-11
AT1G66420	6.3025	-0.728932	21.8273	2.99e-06	7.06e-05
AT2G24760	6.08362	-0.885764	18.9348	1.35e-05	0.000272591
AT3G16040	5.62425	-1.19248	13.9714	0.000185765	0.00264743
AT3G32280	5.39355	-1.33555	11.9535	0.000545773	0.00662808
AT5G08760	5.39011	-1.33617	11.9327	0.000551904	0.00668833
AT5G26150	5.38839	-1.33648	11.9223	0.000554988	0.00671602
AT1G65760	5.26389	-1.41259	10.9387	0.000942232	0.0104363
AT4G29630	5.25862	-1.41351	10.9096	0.00095719	0.010563
AT1G10010	5.1117	-1.49562	9.86663	0.00168376	0.0169141
AT1G33030	5.1117	-1.49562	9.86663	0.00168376	0.0169141
AT2G41225	5.10456	-1.49687	9.83088	0.0017168	0.0171776
AT1G12940	4.9461	-1.58304	8.80588	0.00300368	0.0271486
AT1G78480	4.9461	-1.58304	8.80588	0.00300368	0.0271486
AT4G18720	4.9461	-1.58304	8.80588	0.00300368	0.0271486
AT1G19890	4.94428	-1.58335	8.7977	0.00301716	0.0272157
AT1G75360	4.94064	-1.58398	8.7814	0.00304424	0.0274047
AT4G13410	4.75921	-1.67611	7.73682	0.00541209	0.0431593
AT5G44255	4.75921	-1.67611	7.73682	0.00541209	0.0431593
AT1G58330	4.75734	-1.67642	7.72948	0.00543416	0.0432738
AT5G49340	4.75734	-1.67642	7.72948	0.00543416	0.0432738
AT5G61740	4.75734	-1.67642	7.72948	0.00543416	0.0432738
AT2G31250	4.75549	-1.67673	7.72214	0.00545627	0.0433492
AT3G54630	4.75549	-1.67673	7.72214	0.00545627	0.0433492
AT5G26146	4.75549	-1.67673	7.72214	0.00545627	0.0433492
AT1G66235	4.75363	-1.67705	7.71482	0.00547844	0.043441
AT1G23730	4.73452	4.52935	435.243	2.38e-96	2.66e-92
AT2G41230	4.70688	1.16789	69.6863	7.08e-17	7.73e-15
AT4G12480	4.61621	2.78223	175.637	4.88e-40	2.78e-37
AT5G40590	4.57118	3.33498	233.54	1.24e-52	1.6e-49
AT3G15370	4.37812	3.89476	297.912	1.31e-66	3.66e-63
AT3G58780	4.25211	-0.416715	21.5465	3.46e-06	8.06e-05
AT5G07480	4.13947	-0.499404	19.6844	9.15e-06	0.000192519
AT4G10440	4.03111	1.21158	62.7972	2.33e-15	2.14e-13
AT5G26620	3.92006	0.0253949	27.8843	1.29e-07	4.05e-06
AT5G42530	3.88597	2.99056	166.23	5.47e-38	2.92e-35
AT1G11250	3.85416	0.431688	36.1722	1.82e-09	7.71e-08
AT5G51480	3.76142	-0.776729	14.3635	0.000150823	0.00221747
AT3G11773	3.67769	-0.830367	13.41	0.000250473	0.00343558
AT2G44570	3.66655	4.15986	278.139	2.55e-62	5.36e-59
AT5G19890	3.61437	6.77988	474.734	6.91e-105	1.16e-100
AT5G66430	3.54225	-0.266243	20.3078	6.6e-06	0.000143648
AT1G18350	3.51512	-0.940105	11.6619	0.000638295	0.00753576
AT1G21320	3.5003	-0.300973	19.5497	9.82e-06	0.000205214
AT2G29470	3.45781	2.90209	139.224	4.23e-32	1.42e-29
AT5G33340	3.36921	1.77618	72.7464	1.5e-17	1.73e-15
AT3G26200	3.35411	-0.414706	17.1134	3.53e-05	0.000631217
AT1G75920	3.22037	-1.1241	8.96813	0.00274829	0.0252202
AT5G51720	3.21871	-1.12441	8.95752	0.0027643	0.0253256
AT1G53100	3.21049	-1.12488	8.90509	0.00284479	0.0259569
AT5G55620	3.19765	2.87248	124.457	7.1e-29	2.04e-26
AT3G20395	3.18929	4.06812	223.302	2.08e-50	2.18e-47
AT5G16080	3.1729	0.219672	25.4221	4.62e-07	1.3e-05
AT5G05900	3.13774	2.6762	110.023	1.01e-25	2.23e-23
AT1G06080	3.09948	6.84906	376.212	1.41e-83	7.89e-80
AT1G49570	3.07522	6.53456	363.848	6.7e-81	2.81e-77
AT2G39980	3.03555	7.57887	377.785	6.43e-84	4.32e-80
AT1G53542	3.01605	1.10265	42.493	7.14e-11	3.68e-09
AT4G18680	2.9145	2.80465	106.404	6.28e-25	1.31e-22
AT4G15700	2.82882	0.217062	21.9886	2.75e-06	6.56e-05
AT3G18777	2.8167	-0.776671	10.2402	0.00137475	0.0142568
AT4G13300	2.8118	-0.0623346	17.995	2.22e-05	0.000420121
AT5G53730	2.81071	-0.376479	14.1879	0.000165572	0.00239909
AT5G15720	2.79422	1.82509	59.1945	1.45e-14	1.19e-12
AT1G66990	2.73939	-0.82924	9.46599	0.002094	0.020221
AT1G05010	2.7087	8.5838	316.4	1.28e-70	4.78e-67
AT3G49380	2.69208	1.50044	46.6504	8.56e-12	4.98e-10
AT3G45290	2.6557	-0.883039	8.68075	0.00321699	0.0286376
AT3G17225	2.64783	-0.885609	8.62396	0.00331882	0.0293497
AT2G26070	2.63912	4.81665	234.111	9.29e-53	1.3e-49
AT4G11140	2.61041	0.269672	20.4252	6.21e-06	0.000136247
AT1G28370	2.58655	2.74968	87.3974	9.14e-21	1.36e-18
AT4G14140	2.57538	-0.541234	11.0613	0.000881965	0.00988937
AT5G07560	2.56178	-0.94094	7.86601	0.00503871	0.0407719
AT3G44740	2.55862	-0.940494	7.8448	0.00509816	0.0412014
AT1G79120	2.52541	1.44753	41.3679	1.27e-10	6.28e-09
AT2G32487	2.50557	-0.585151	10.2495	0.00136783	0.0142002
AT5G06730	2.49971	-0.584269	10.1976	0.0014069	0.014529
AT2G44080	2.48223	6.47388	254.707	3.12e-57	4.99e-54
AT5G47220	2.46807	1.22599	34.9847	3.34e-09	1.38e-07
AT5G03310	2.46733	1.63202	44.4006	2.7e-11	1.46e-09
AT3G03660	2.45372	1.98926	54.0819	1.94e-13	1.39e-11
AT1G77380	2.45002	4.49432	183.693	8.59e-42	5.45e-39
AT2G31085	2.42028	2.7084	77.6206	1.28e-18	1.62e-16
AT5G44390	2.4199	3.98395	143.482	4.98e-33	1.82e-30
AT2G28570	2.41324	3.47827	112.696	2.64e-26	6.33e-24
AT1G33615	2.36342	0.431629	19.7274	8.95e-06	0.000188707
AT3G49970	2.35361	2.44708	64.8584	8.18e-16	8.16e-14
AT4G12470	2.30734	7.3976	233.808	1.08e-52	1.45e-49
AT1G66980	2.28916	0.642162	21.6934	3.21e-06	7.51e-05
AT5G27400	2.28395	-0.726009	7.96547	0.0047692	0.0391473
AT4G00670	2.2705	-0.191765	12.0865	0.000508197	0.00623966
AT1G62190	2.20022	6.29333	205.497	1.55e-46	1.33e-43
AT2G29310	2.1969	2.35742	55.4116	9.89e-14	7.42e-12
AT2G43140	2.17514	3.39932	91.9722	9.08e-22	1.47e-19
AT4G15550	2.1723	6.12202	199.672	2.86e-45	2.29e-42
AT5G22300	2.16998	-0.264551	10.7146	0.00106345	0.0115319
AT4G04692	2.16181	-0.0616163	12.3581	0.000439369	0.00551756
AT1G69430	2.15273	0.676491	20.1085	7.33e-06	0.000157582
AT1G49210	2.14273	1.14881	26.9067	2.14e-07	6.4e-06
AT1G60525	2.11432	-0.302358	10.0094	0.00155814	0.0158479
AT3G49070	2.10599	2.65835	60.9398	5.97e-15	5.13e-13
AT5G17780	2.10182	3.45351	89.2218	3.64e-21	5.63e-19
AT2G33680	2.08487	0.501057	17.0255	3.69e-05	0.000656901
AT3G51600	2.05551	7.32408	189.513	4.65e-43	3.06e-40
AT3G06020	2.05123	-0.339224	9.26124	0.00234145	0.0220838
AT1G36060	2.03994	5.32578	169.932	8.54e-39	4.63e-36
AT4G13395	2.03773	0.886494	21.2379	4.06e-06	9.31e-05
AT1G19530	2.01811	5.98174	174.209	9.99e-40	5.5e-37
AT5G46330	2.00921	3.76402	95.8769	1.27e-22	2.24e-20
AT1G18265	2.00397	0.167562	12.8868	0.000331141	0.00435197
AT4G15690	1.9986	-0.376187	8.64341	0.00328358	0.0291145
AT1G25320	1.99669	4.67937	141.539	1.32e-32	4.58e-30
AT2G18060	1.99213	-0.376637	8.58406	0.00339232	0.0298856
AT5G10220	1.98498	-0.00223514	11.2805	0.000783684	0.00896382
AT2G22880	1.98047	1.50349	29.4093	5.88e-08	1.97e-06
AT1G72290	1.97168	4.58526	132.904	1.01e-30	3.25e-28
AT5G20820	1.96963	3.68659	89.2614	3.57e-21	5.55e-19
AT5G09370	1.96877	-0.193725	9.70222	0.00184123	0.0182467
AT1G70660	1.96819	0.294655	13.5817	0.000228586	0.00317948
AT2G39681	1.95498	1.48924	28.5376	9.22e-08	2.99e-06
AT5G02760	1.94022	5.19974	152.172	6.34e-35	2.7e-32
AT2G18690	1.92783	4.95566	143.144	5.91e-33	2.11e-30
AT5G01180	1.91062	2.47904	47.2697	6.24e-12	3.7e-10
AT1G28530	1.90153	1.51327	27.5676	1.52e-07	4.68e-06
AT3G45280	1.89894	-0.0634192	10.07	0.00150772	0.0153862
AT1G72810	1.88215	4.05643	97.6793	5.1e-23	9.22e-21
AT5G02540	1.87014	6.00025	152.17	6.35e-35	2.7e-32
AT2G17880	1.86955	3.89238	90.0261	2.42e-21	3.79e-19
AT5G18470	1.85424	4.06766	95.6858	1.39e-22	2.45e-20
AT3G28510	1.85136	-0.0940833	9.44551	0.00211751	0.0204011
AT3G13403	1.84804	-0.264207	8.28212	0.00400499	0.0342549
AT5G44580	1.84499	1.55656	27.0432	2e-07	6e-06
AT5G48175	1.84189	1.61533	27.778	1.36e-07	4.25e-06
AT5G50335	1.82863	3.65296	77.507	1.35e-18	1.7e-16
AT2G39705	1.82696	4.08274	93.8236	3.57e-22	5.99e-20
AT1G06330	1.80791	2.24593	38.1779	6.49e-10	2.92e-08
AT3G01670	1.80624	4.61037	115.531	6.33e-27	1.59e-24
AT1G61800	1.80312	2.93449	53.6281	2.45e-13	1.73e-11
AT5G46710	1.80206	4.17674	95.3173	1.68e-22	2.88e-20
AT1G04840	1.7987	-0.298932	7.7211	0.00545942	0.0433492
AT3G59900	1.79763	6.40541	143.104	6.02e-33	2.13e-30
AT1G62770	1.79034	7.31272	146.875	9.06e-34	3.46e-31
AT1G76210	1.78909	0.521126	13.4476	0.000245508	0.00338127
AT2G27220	1.78176	0.293604	11.5432	0.000680364	0.00795257
AT4G37800	1.78012	5.53168	136.199	1.94e-31	6.31e-29
AT1G76470	1.76545	1.2275	20.6209	5.61e-06	0.000124213
AT5G64120	1.75876	4.91879	120.93	4.18e-28	1.14e-25
AT5G63660	1.75254	2.10798	33.7064	6.44e-09	2.53e-07
AT2G33130	1.74922	0.770744	15.3277	9.05e-05	0.00143817
AT3G28320	1.74563	1.3877	22.2778	2.36e-06	5.72e-05
AT3G20590	1.73266	0.580723	13.2779	0.000268749	0.00364754
AT1G29418	1.72892	0.475858	12.3703	0.000436513	0.00548374
AT3G60520	1.72623	3.89765	78.4288	8.49e-19	1.1e-16
AT5G43890	1.71797	1.1219	18.4963	1.7e-05	0.000331769
AT4G24670	1.71717	3.03682	51.8555	6.04e-13	4.03e-11
AT5G44260	1.71669	5.19019	122.113	2.31e-28	6.41e-26
AT5G56050	1.71415	-0.0310572	8.70369	0.00317676	0.0283772
AT1G13480	1.70506	-0.0323612	8.60727	0.00334936	0.0295809
AT3G15800	1.70153	0.819756	15.1101	0.000101516	0.00159041
AT5G06570	1.68955	4.32035	90.6479	1.77e-21	2.78e-19
AT5G12280	1.6847	0.0859929	9.18483	0.00244122	0.0229027
AT5G13790	1.68354	1.16535	18.3119	1.88e-05	0.000360825
AT2G30933	1.67214	0.319443	10.6087	0.0011261	0.0120789
AT4G25100	1.6564	3.60294	63.5894	1.56e-15	1.48e-13
AT3G20898	1.65608	0.698589	13.3559	0.000257808	0.00352037
AT3G27650	1.6458	2.65522	40.0135	2.54e-10	1.21e-08
AT4G22620	1.64575	1.51512	21.7348	3.14e-06	7.36e-05
AT2G34080	1.64372	3.15591	50.9964	9.35e-13	6.16e-11
AT5G03740	1.64316	6.20725	120.797	4.47e-28	1.21e-25
AT1G10060	1.63994	3.48498	59.3502	1.34e-14	1.1e-12
AT1G04310	1.63138	4.9818	107.079	4.47e-25	9.44e-23
AT5G09970	1.63106	2.96155	45.6929	1.39e-11	7.89e-10
AT1G56120	1.62674	0.295646	9.94307	0.00161527	0.0163547
AT2G29460	1.62263	2.41752	34.5997	4.07e-09	1.65e-07
AT4G35160	1.6107	7.38164	120.735	4.61e-28	1.24e-25
AT3G18630	1.60486	1.67056	22.6489	1.95e-06	4.85e-05
AT4G00890	1.60127	0.0305023	8.10369	0.00441885	0.036875
AT5G03270	1.60041	1.38561	19.2078	1.17e-05	0.000240141
AT1G23510	1.59389	0.27313	9.45694	0.00210436	0.0203035
AT5G25180	1.59011	0.0286284	7.9865	0.00471414	0.0387996
AT1G62380	1.5891	11.3004	113.425	1.83e-26	4.42e-24
AT5G10572	1.58434	0.0301989	7.92689	0.00487196	0.0397867
AT1G63360	1.58034	0.141775	8.56022	0.00343702	0.030228
AT3G47510	1.57964	2.17854	29.1214	6.82e-08	2.26e-06
AT2G05440	1.57794	2.91629	42.235	8.15e-11	4.15e-09
AT5G59845	1.57469	1.51812	20.1156	7.3e-06	0.000157197
AT5G18670	1.57388	6.6578	112.435	3.01e-26	7.07e-24
AT5G66440	1.57014	4.3912	81.9197	1.45e-19	1.97e-17
AT1G62280	1.56327	1.54837	20.2456	6.82e-06	0.000147818
AT4G13840	1.55845	2.93381	41.5385	1.16e-10	5.81e-09
AT3G60550	1.55763	4.39902	81.0791	2.22e-19	2.97e-17
AT2G21910	1.55303	4.85709	95.4882	1.54e-22	2.65e-20
AT1G33790	1.55059	6.15837	108.329	2.38e-25	5.1e-23
AT2G26740	1.55013	3.7975	61.7945	3.87e-15	3.46e-13
AT2G23130	1.54309	2.49191	32.8667	9.91e-09	3.77e-07
AT2G19590	1.54068	5.3584	103.078	3.35e-24	6.67e-22
AT3G48250	1.53961	1.1241	15.3143	9.11e-05	0.00144705
AT1G51380	1.53847	0.994778	14.1734	0.000166848	0.00241574
AT5G14920	1.53615	8.61728	111.542	4.72e-26	1.06e-23
AT5G62280	1.53496	5.38708	102.859	3.75e-24	7.4e-22
AT1G74453	1.53079	0.61911	11.0443	0.000890055	0.00997072
AT1G52890	1.5286	0.522091	10.3357	0.00130541	0.0136449
AT2G33230	1.52832	0.115746	7.91291	0.00490976	0.0400078
AT2G16060	1.52828	4.92782	94.054	3.18e-22	5.36e-20
AT2G46750	1.52694	2.01956	25.2087	5.16e-07	1.43e-05
AT1G11330	1.5264	1.10966	14.9834	0.000108564	0.00168279
AT3G23150	1.52519	5.80503	103.871	2.25e-24	4.5e-22
AT1G05020	1.52472	3.0722	42.7761	6.18e-11	3.21e-09
AT2G05510	1.5247	5.51793	102.454	4.59e-24	8.98e-22
AT3G55250	1.51886	5.00524	94.5679	2.45e-22	4.18e-20
AT2G29260	1.51872	0.220886	8.41588	0.00372079	0.0322261
AT4G34419	1.51862	2.46808	31.5799	1.92e-08	6.98e-07
AT5G06720	1.50435	1.63456	19.8585	8.35e-06	0.000177871
AT1G11185	1.50177	2.98605	39.8667	2.74e-10	1.3e-08
ATCG00100	1.49829	0.0892106	7.52139	0.00609869	0.0471623
AT1G25560	1.49479	6.46673	101.581	7.13e-24	1.39e-21
AT3G47180	1.49288	0.0867786	7.46489	0.00629302	0.0484372
AT1G21910	1.48561	5.31559	95.631	1.43e-22	2.51e-20
AT2G39855	1.4834	1.08364	14.0107	0.000181924	0.00260929
AT4G10310	1.47795	1.69358	19.8667	8.32e-06	0.000177229
AT1G50040	1.47681	2.02546	23.9709	9.8e-07	2.58e-05
AT1G27730	1.47468	1.19325	14.8063	0.000119249	0.0018332
AT2G42850	1.4729	5.51663	96.057	1.16e-22	2.06e-20
AT2G16740	1.47149	3.6289	52.0373	5.5e-13	3.72e-11
AT4G39366	1.46825	0.19407	7.77992	0.00528449	0.042373
AT1G07390	1.46775	0.583327	9.98228	0.00158124	0.0160439
AT1G44830	1.46418	3.76788	55.06	1.18e-13	8.75e-12
AT5G60730	1.45745	0.294872	8.20506	0.00417868	0.035318
AT2G22870	1.45498	2.10781	24.3457	8.07e-07	2.17e-05
AT4G37740	1.45308	5.45655	93.2749	4.7e-22	7.8e-20
AT3G29430	1.45212	2.69247	32.6764	1.09e-08	4.13e-07
AT2G44000	1.44447	0.170196	7.45461	0.00632907	0.0486701
AT4G24430	1.44071	1.11257	13.5329	0.000234596	0.00325365
AT4G13710	1.43893	2.85826	34.8393	3.6e-09	1.47e-07
AT4G35190	1.43783	5.06032	86.2496	1.63e-20	2.4e-18
AT3G44990	1.43666	8.40414	98.2107	3.9e-23	7.16e-21
AT5G57760	1.43001	0.272075	7.82574	0.00515219	0.0415501
AT1G75060	1.42964	0.458206	8.82614	0.0029705	0.0268994
AT5G17700	1.41552	5.11112	84.5653	3.82e-20	5.39e-18
AT1G53080	1.41545	2.06291	22.5437	2.06e-06	5.07e-05
AT5G53660	1.41485	6.24935	91.3775	1.23e-21	1.95e-19
AT4G19760	1.41428	0.270801	7.6493	0.00568099	0.0446259
AT1G56260	1.41183	0.542202	9.07163	0.00259703	0.0241152
AT1G80150	1.41053	1.8315	19.7402	8.89e-06	0.000187563
AT5G26731	1.40058	3.39342	42.8354	6e-11	3.11e-09
AT1G63400	1.39648	0.342979	7.87667	0.0050091	0.0405616
AT1G80760	1.39624	2.92751	33.9978	5.54e-09	2.2e-07
AT4G14130	1.39617	9.35568	92.3578	7.47e-22	1.22e-19
AT1G80130	1.39317	0.345075	7.83866	0.0051155	0.0412939
AT2G47550	1.39005	4.70231	74.4715	6.28e-18	7.51e-16
AT5G03890	1.38857	2.76453	31.272	2.25e-08	8.08e-07
AT1G73830	1.38542	4.92164	78.3707	8.74e-19	1.13e-16
AT3G23240	1.38148	0.680023	9.58769	0.00195967	0.0191828
AT4G38410	1.38115	2.68851	29.8979	4.57e-08	1.56e-06
AT3G60530	1.3773	6.57869	87.1031	1.06e-20	1.57e-18
AT3G56570	1.36648	1.21524	13.1539	0.000287137	0.00385507
AT1G22275	1.36639	1.36263	14.3561	0.000151418	0.00222395
AT3G15450	1.365	7.26842	87.8913	7.12e-21	1.08e-18
AT3G11720	1.36407	6.09669	84.9731	3.11e-20	4.43e-18
AT4G14103	1.36179	0.318746	7.42019	0.00645126	0.0494062
AT1G10520	1.35128	0.501275	8.18187	0.00423242	0.0356915
AT1G32928	1.34897	0.503622	8.15349	0.00429915	0.0360821
AT2G27400	1.3489	1.25287	13.153	0.000287278	0.00385542
AT2G47270	1.34705	4.31099	59.8022	1.06e-14	8.85e-13
AT4G19239	1.3466	2.08911	20.9271	4.78e-06	0.000107723
AT1G34245	1.34018	1.15261	12.185	0.000482066	0.00596899
AT4G38580	1.3384	5.23427	77.612	1.28e-18	1.62e-16
AT4G02520	1.33798	7.96118	85.5806	2.29e-20	3.34e-18
AT1G49750	1.33477	2.05104	20.2029	6.98e-06	0.000150862
AT4G13420	1.33014	3.53089	41.3575	1.28e-10	6.3e-09
AT1G33260	1.32755	3.67679	44.1161	3.12e-11	1.68e-09
AT3G12730	1.32259	1.0839	11.4353	0.00072102	0.00836667
AT2G25940	1.31806	2.80413	28.959	7.42e-08	2.44e-06
AT3G62890	1.31126	0.903087	10.0888	0.00149238	0.0152482
AT1G18745	1.30594	0.696238	8.78612	0.00303638	0.0273413
AT3G25730	1.30562	5.77035	77.4148	1.42e-18	1.77e-16
AT3G29410	1.30453	7.7369	81.3431	1.95e-19	2.62e-17
AT1G75490	1.30291	1.817	16.9803	3.78e-05	0.000670937
AT2G02150	1.29998	0.768619	9.11678	0.00253371	0.023628
AT5G25190	1.29714	4.55665	61.7234	4.01e-15	3.57e-13
AT4G37580	1.2956	4.0272	49.2528	2.27e-12	1.43e-10
AT1G13930	1.29553	4.42515	58.3747	2.2e-14	1.74e-12
AT1G64460	1.29389	5.71693	75.8615	3.11e-18	3.8e-16
AT2G41050	1.2883	4.47766	59.0507	1.56e-14	1.27e-12
AT1G76410	1.27991	2.74014	26.6212	2.48e-07	7.32e-06
AT4G03140	1.26939	3.76588	42.3185	7.81e-11	3.99e-09
AT5G01740	1.26589	2.85251	27.5436	1.54e-07	4.74e-06
AT4G30420	1.26059	4.31223	52.9211	3.51e-13	2.45e-11
AT1G04180	1.25863	2.13339	18.9548	1.34e-05	0.000270065
AT1G48340	1.25482	1.19	11.0994	0.000864039	0.00972405
AT5G49290	1.25377	0.920769	9.41263	0.00215581	0.0207344
AT5G28510	1.24962	4.73109	61.7241	4.01e-15	3.57e-13
AT3G10290	1.24939	2.86	26.9597	2.08e-07	6.25e-06
AT3G56650	1.24922	2.81918	26.3996	2.78e-07	8.13e-06
AT1G79470	1.2475	4.01543	45.8025	1.32e-11	7.51e-10
AT5G46700	1.24352	4.54764	56.8746	4.7e-14	3.62e-12
AT4G28500	1.24015	1.57061	13.5303	0.000234923	0.00325685
AT5G66985	1.23959	1.0863	10.1643	0.00143252	0.0147397
AT3G19200	1.23806	1.27987	11.418	0.000727759	0.00843031
AT1G15830	1.23691	0.714921	8.07342	0.00449326	0.0373753
AT4G37730	1.23329	1.02618	9.72939	0.00181421	0.0180321
AT3G30122	1.22565	1.31701	11.4582	0.000712195	0.00828143
AT1G74440	1.22281	0.841068	8.55039	0.00345563	0.0303599
AT3G44260	1.22177	3.18614	30.2255	3.86e-08	1.34e-06
AT1G26270	1.22109	6.04921	68.7194	1.16e-16	1.24e-14
AT3G26740	1.22056	3.59197	36.2911	1.71e-09	7.28e-08
AT1G50110	1.21817	2.21363	18.5542	1.65e-05	0.000323474
AT1G01725	1.21722	1.69698	13.9972	0.000183239	0.00262367
AT3G25740	1.2172	2.53751	21.9571	2.79e-06	6.65e-05
AT4G34380	1.21243	1.97562	16.2421	5.58e-05	0.000946021
AT1G14890	1.21032	3.3356	31.8751	1.65e-08	6.07e-07
AT3G30110	1.20975	0.768546	8.01666	0.00463627	0.03829
AT2G43860	1.20892	1.62065	13.2744	0.000269256	0.00365295
AT5G56850	1.20733	1.33996	11.326	0.000764707	0.00879465
AT3G10040	1.20449	1.50548	12.391	0.0004317	0.00543752
AT1G48570	1.20384	3.34178	31.673	1.83e-08	6.67e-07
AT1G25530	1.20356	4.49273	52.3534	4.69e-13	3.21e-11
AT4G35720	1.2016	7.36055	68.9207	1.04e-16	1.12e-14
AT5G67060	1.20156	5.13767	62.3795	2.88e-15	2.63e-13
AT1G30835	1.20028	0.887193	8.51425	0.00352493	0.0308397
AT1G33440	1.19989	1.90035	15.3093	9.14e-05	0.00145019
AT2G01290	1.19985	2.01872	16.3285	5.33e-05	0.000909955
AT1G06370	1.19836	1.29141	10.8535	0.000986618	0.0108245
AT5G66960	1.19656	1.0578	9.36949	0.00220714	0.0210833
AT3G15650	1.19411	1.20071	10.2034	0.00140248	0.0144927
AT2G47230	1.19386	1.14788	9.88202	0.00166974	0.016815
AT1G66440	1.19331	2.14428	17.2446	3.29e-05	0.000592878
AT5G13910	1.19292	3.41851	32.1928	1.4e-08	5.2e-07
AT3G52340	1.19276	4.58154	53.3317	2.85e-13	2e-11
AT1G17345	1.19161	2.21266	17.8353	2.41e-05	0.000451048
AT1G01650	1.19062	5.28423	62.8338	2.28e-15	2.11e-13
AT5G23360	1.188	3.05671	26.8843	2.17e-07	6.45e-06
AT1G16110	1.18392	1.59723	12.6443	0.000376964	0.00486664
AT2G15960	1.1825	5.10098	60.0863	9.21e-15	7.73e-13
AT5G49690	1.17832	3.65866	35.0819	3.18e-09	1.31e-07
AT1G68840	1.17748	4.00265	40.7639	1.73e-10	8.46e-09
AT4G18470	1.1769	1.03839	9.01237	0.00268257	0.0247863
AT3G62060	1.17535	4.57334	51.7128	6.49e-13	4.31e-11
AT4G23060	1.1745	3.69222	35.365	2.75e-09	1.14e-07
AT1G27620	1.17417	2.22032	17.4318	2.98e-05	0.000543406
AT5G18362	1.17168	0.872651	8.05974	0.00452733	0.0375843
AT3G57190	1.168	1.27017	10.2159	0.00139296	0.0144254
AT3G22120	1.16456	5.98203	62.6574	2.5e-15	2.29e-13
AT2G34185	1.16309	0.805732	7.6245	0.00575963	0.0451276
AT4G01390	1.16299	2.73831	22.295	2.34e-06	5.68e-05
AT4G10950	1.16169	0.983124	8.48364	0.00358472	0.0312876
AT5G10990	1.1563	2.96663	24.4103	7.8e-07	2.1e-05
AT4G23750	1.15534	3.46462	30.936	2.68e-08	9.54e-07
AT3G16770	1.15339	7.3568	63.6681	1.5e-15	1.43e-13
AT5G59540	1.14641	7.02876	62.3266	2.95e-15	2.68e-13
AT4G21400	1.1457	4.16482	41.4935	1.19e-10	5.94e-09
AT5G49170	1.14556	3.08879	25.6246	4.16e-07	1.18e-05
AT5G45720	1.1409	4.05309	39.2895	3.68e-10	1.7e-08
AT5G14780	1.14009	9.69144	62.1151	3.29e-15	2.98e-13
AT3G53470	1.13831	1.76819	12.8696	0.000334203	0.00438365
AT1G09530	1.13486	7.23184	61.5083	4.47e-15	3.96e-13
AT4G23515	1.13457	2.7917	21.7814	3.06e-06	7.21e-05
AT1G80245	1.13427	1.20786	9.30426	0.00228711	0.0216873
AT4G18440	1.13376	3.54409	30.9005	2.73e-08	9.71e-07
AT1G13250	1.13206	4.99017	54.2508	1.78e-13	1.28e-11
AT5G54880	1.1268	1.11194	8.66996	0.00323608	0.0287922
AT4G34320	1.12572	1.24453	9.39318	0.00217881	0.0208839
AT3G05600	1.12421	3.05981	24.3091	8.22e-07	2.2e-05
AT3G61440	1.11967	9.36078	60.221	8.6e-15	7.26e-13
AT1G62110	1.11921	1.44917	10.489	0.00120145	0.0127267
AT2G22650	1.113	2.05905	14.5175	0.000138988	0.00207218
AT4G27900	1.11299	4.17626	39.317	3.62e-10	1.68e-08
AT2G01755	1.11188	0.936367	7.63431	0.00572838	0.0449247
AT1G11950	1.11127	3.46982	28.822	7.96e-08	2.6e-06
AT4G20030	1.1103	1.00126	7.8872	0.00498001	0.0403956
AT5G44785	1.10766	3.02266	23.2089	1.46e-06	3.7e-05
AT1G26290	1.10756	1.64931	11.484	0.000702395	0.00818447
AT1G31010	1.10506	1.19155	8.77884	0.00304852	0.0274285
AT3G12820	1.10208	4.35372	41.7561	1.04e-10	5.25e-09
AT5G10625	1.09797	3.48949	28.4062	9.87e-08	3.18e-06
AT3G51410	1.09225	3.5681	29.0601	7.04e-08	2.32e-06
AT1G06320	1.09199	1.53913	10.5308	0.00117459	0.0124969
AT1G15040	1.08761	5.22533	52.3195	4.77e-13	3.26e-11
AT5G49700	1.08705	4.74315	47.6064	5.26e-12	3.14e-10
AT3G49410	1.08643	1.08114	7.97368	0.00474762	0.0390274
AT3G18600	1.08587	4.58194	44.6301	2.4e-11	1.32e-09
AT5G15530	1.08466	4.51768	43.3907	4.52e-11	2.37e-09
AT5G15120	1.08449	4.23451	38.4257	5.72e-10	2.59e-08
AT2G46990	1.08235	3.67213	30.0419	4.24e-08	1.46e-06
AT4G15640	1.08119	3.5432	28.2308	1.08e-07	3.44e-06
AT5G07760	1.08053	2.39129	16.2729	5.49e-05	0.000933421
AT1G69890	1.07453	1.4564	9.74821	0.00179574	0.0178644
AT3G25560	1.07166	3.66973	29.4372	5.8e-08	1.95e-06
AT5G13290	1.07114	1.59944	10.4893	0.00120126	0.0127267
AT5G64100	1.07084	9.05132	55.3788	1.01e-13	7.53e-12
AT4G15510	1.0657	2.72706	18.7927	1.46e-05	0.000290365
AT2G46660	1.06536	1.53092	9.98438	0.00157943	0.0160305
AT1G58170	1.06521	1.80907	11.6545	0.000640867	0.00755396
AT3G18260	1.06416	1.24698	8.47003	0.00361164	0.031451
AT2G41100	1.06257	5.61743	51.8619	6.02e-13	4.03e-11
AT2G22860	1.06208	3.5704	27.5811	1.51e-07	4.66e-06
AT2G17670	1.06178	1.0689	7.5744	0.00592188	0.0461086
AT3G14850	1.06135	5.65437	51.8307	6.11e-13	4.08e-11
AT1G66810	1.05975	1.29333	8.63569	0.00329753	0.0291922
AT1G73770	1.05843	1.10878	7.72472	0.00544849	0.0433492
AT1G26230	1.05758	2.22814	14.403	0.000147693	0.00217972
AT1G64065	1.05702	1.11393	7.70574	0.00550607	0.0435573
AT5G12330	1.05584	1.84143	11.657	0.000639991	0.00754627
AT4G06744	1.0558	6.35566	52.1541	5.19e-13	3.53e-11
AT1G17665	1.05265	2.01432	12.7876	0.00034916	0.00455317
AT5G44820	1.05165	3.60806	27.5801	1.51e-07	4.66e-06
AT4G35070	1.05122	3.16479	22.566	2.03e-06	5.03e-05
AT2G14247	1.05096	1.75036	10.9535	0.000934778	0.0103811
AT3G27580	1.05068	5.17131	48.5595	3.23e-12	1.99e-10
AT4G09530	1.04968	3.6371	27.9014	1.28e-07	4.01e-06
AT2G39400	1.0479	4.86891	45.791	1.33e-11	7.53e-10
AT1G64080	1.04608	2.69992	17.9071	2.32e-05	0.000436068
AT1G15170	1.04477	3.47628	25.7322	3.93e-07	1.12e-05
AT5G05250	1.04467	1.50626	9.52793	0.00202451	0.0197085
AT1G64470	1.04454	5.28384	48.9317	2.68e-12	1.66e-10
AT4G37890	1.0398	3.5923	26.8267	2.23e-07	6.64e-06
AT1G74055	1.03971	1.26967	8.23476	0.00411085	0.0348763
AT4G24480	1.03932	6.4293	50.6464	1.12e-12	7.3e-11
AT3G11220	1.03926	1.70548	10.4923	0.00119932	0.012722
AT3G62090	1.03596	5.59271	49.331	2.18e-12	1.38e-10
AT2G38980	1.03554	3.01489	20.3849	6.34e-06	0.000138696
AT5G17165	1.03287	3.3046	23.3474	1.36e-06	3.46e-05
AT4G21780	1.03247	1.61317	9.84264	0.00170586	0.0170815
AT5G03670	1.03152	4.07179	32.6899	1.09e-08	4.11e-07
AT4G14840	1.02626	1.5012	9.16197	0.0024719	0.0231323
AT1G76870	1.02624	2.01877	12.2366	0.000468918	0.00583197
AT5G57240	1.02353	6.08656	48.9606	2.64e-12	1.64e-10
AT5G51080	1.02219	1.60165	9.61432	0.00193146	0.0189786
AT3G13230	1.02137	3.87378	29.467	5.71e-08	1.92e-06
AT5G03730	1.02027	6.77932	49.2546	2.27e-12	1.43e-10
AT4G09730	1.01909	4.28212	34.9031	3.48e-09	1.43e-07
AT4G00620	1.01822	3.67701	26.7979	2.27e-07	6.73e-06
AT1G50450	1.01781	2.72261	17.2041	3.36e-05	0.000604352
AT3G50330	1.01714	5.30711	46.6785	8.44e-12	4.94e-10
AT2G34650	1.01582	3.75303	27.6892	1.43e-07	4.43e-06
AT5G03830	1.01573	1.34117	8.2151	0.00415562	0.0351497
AT4G13495	1.01451	2.20379	13.1423	0.000288917	0.00387123
AT2G46630	1.01415	2.43811	14.8143	0.000118743	0.00182686
AT1G29030	1.01309	2.42244	14.6493	0.000129598	0.00195737
AT2G39350	1.01178	5.20503	45.404	1.62e-11	9.05e-10
AT2G24140	1.01082	1.25749	7.74198	0.00539668	0.0430773
AT1G60390	1.00922	3.4016	23.2656	1.41e-06	3.6e-05
AT5G67020	1.00808	4.57318	38.5564	5.35e-10	2.43e-08
AT4G31610	1.00728	2.79784	17.5045	2.87e-05	0.000525855
AT3G56170	1.00689	6.45332	47.6062	5.26e-12	3.14e-10
AT1G12430	1.00633	3.96164	29.8211	4.75e-08	1.62e-06
AT5G62290	1.00481	3.19939	21.0572	4.47e-06	0.000101401
AT1G80530	1.0041	4.89591	42.427	7.39e-11	3.79e-09
AT5G27620	1.00202	2.72855	16.755	4.26e-05	0.000744545
AT5G48890	1.00021	3.62492	25.2792	4.97e-07	1.39e-05
AT3G26540	0.997858	1.55073	8.94193	0.00278799	0.025494
AT5G40100	0.996379	3.47325	23.4761	1.27e-06	3.26e-05
AT4G16442	0.996058	5.90626	46.2067	1.07e-11	6.17e-10
AT5G14740	0.994328	7.4095	47.7487	4.89e-12	2.94e-10
AT3G63140	0.98838	3.65467	25.0654	5.56e-07	1.53e-05
AT5G22700	0.988058	2.22833	12.6624	0.000373332	0.00482386
AT2G38430	0.9877	2.20803	12.5262	0.000401564	0.00514078
AT5G66360	0.987461	1.57932	8.90604	0.00284332	0.0259505
AT3G25430	0.986752	1.95924	10.9447	0.000939223	0.0104133
AT3G51400	0.986614	2.94176	17.8943	2.34e-05	0.000438497
AT1G21400	0.985836	2.97263	18.1525	2.04e-05	0.000388968
AT4G01870	0.984009	6.92997	46.1634	1.1e-11	6.3e-10
AT1G08810	0.983593	2.4006	13.6965	0.000215027	0.00301459
AT4G30990	0.98346	3.25513	20.7915	5.13e-06	0.000114854
AT2G43840	0.983061	2.47094	14.2119	0.000163471	0.00237502
AT3G28917	0.981715	2.00375	11.1125	0.000857958	0.0096735
AT4G15570	0.981621	2.60456	15.1716	9.83e-05	0.00154669
AT5G05965	0.981244	1.52889	8.58383	0.00339276	0.0298856
AT4G02040	0.981235	2.27618	12.7582	0.000354709	0.00461478
AT3G58430	0.979612	1.8912	10.4344	0.00123748	0.0130444
AT2G35260	0.979196	3.8426	26.8861	2.16e-07	6.45e-06
AT4G04940	0.97285	2.58935	14.7857	0.000120558	0.00184825
AT4G29760	0.969191	2.72409	15.689	7.47e-05	0.00121205
AT1G63810	0.967969	3.42585	21.7856	3.05e-06	7.2e-05
AT4G12410	0.966827	3.26689	20.1778	7.07e-06	0.000152556
AT1G63660	0.965298	4.46427	33.9917	5.56e-09	2.2e-07
AT5G25757	0.963317	3.39343	21.2436	4.05e-06	9.29e-05
AT4G13500	0.962605	1.65152	8.83001	0.00296422	0.0268642
AT3G12270	0.962555	3.03741	17.9245	2.3e-05	0.000433281
AT1G74170	0.96195	2.55575	14.2526	0.000159979	0.00233035
AT3G59400	0.961055	2.16658	11.6415	0.000645353	0.00760151
AT5G63040	0.960852	2.3523	12.7495	0.000356353	0.00462722
AT3G55340	0.959502	3.02899	17.7638	2.5e-05	0.000466222
AT1G77670	0.958182	4.10087	28.6859	8.54e-08	2.78e-06
AT2G41090	0.956349	4.73824	37.1332	1.11e-09	4.83e-08
AT1G01020	0.954202	2.67191	14.8392	0.000117187	0.00180479
AT1G71030	0.953223	1.61678	8.49461	0.00356318	0.0311338
AT5G08650	0.952696	4.94045	38.6299	5.15e-10	2.35e-08
AT5G12170	0.95096	5.52872	41.6908	1.08e-10	5.41e-09
AT3G55510	0.95075	3.24592	19.3817	1.07e-05	0.000221673
AT1G31360	0.95069	1.74063	9.03261	0.00265304	0.0245482
AT2G43190	0.947353	2.08123	10.8697	0.000978026	0.0107442
AT5G03610	0.94706	5.12351	39.4504	3.39e-10	1.58e-08
AT3G53850	0.947055	2.24907	11.7875	0.000596669	0.00715598
AT3G20440	0.94502	2.2342	11.7069	0.00062307	0.00739607
AT5G38290	0.943416	2.66812	14.5373	0.000137531	0.00205319
AT1G80840	0.943067	1.75653	8.99051	0.00271485	0.0249685
AT1G30960	0.941924	1.92015	9.84913	0.00169986	0.0170417
AT3G23710	0.94152	2.38152	12.4467	0.000419006	0.00532352
AT5G45680	0.941004	3.07104	17.4396	2.97e-05	0.000541752
AT5G24205	0.939415	1.57817	8.10805	0.00440824	0.0368139
AT1G09800	0.939327	1.50893	7.8035	0.00521599	0.0419339
AT4G38100	0.936243	3.61726	22.1558	2.52e-06	6.07e-05
AT1G64370	0.935242	3.49508	21.0261	4.54e-06	0.000102783
AT2G19870	0.934525	2.92547	16.0688	6.11e-05	0.00102537
AT5G27330	0.93357	3.24337	18.7084	1.53e-05	0.000302219
AT4G38650	0.932345	1.75916	8.78798	0.00303329	0.0273354
AT4G03935	0.931899	2.3346	11.9254	0.00055409	0.0067089
AT5G17430	0.928515	2.25306	11.3905	0.000738631	0.00853272
AT5G44210	0.927224	2.52519	13.0632	0.000301374	0.00401733
AT3G09720	0.927096	2.56413	13.3504	0.000258563	0.00352925
AT4G27520	0.923627	4.30123	29.1436	6.74e-08	2.24e-06
AT3G04160	0.922579	2.11978	10.5326	0.00117343	0.0124906
AT5G16715	0.921947	4.17712	27.5124	1.57e-07	4.8e-06
AT2G28660	0.921714	2.52271	12.8892	0.000330719	0.00434813
AT2G34260	0.919404	3.07336	16.734	4.31e-05	0.00075082
AT3G13222	0.917313	3.53362	20.5749	5.74e-06	0.000126999
AT2G05100	0.915457	1.65134	8.02888	0.00460511	0.0381357
AT4G16146	0.912565	4.11181	26.2559	3e-07	8.69e-06
AT5G25360	0.912264	4.95923	35.6506	2.37e-09	9.95e-08
AT5G23350	0.911347	3.07661	16.4678	4.95e-05	0.000853293
AT2G40940	0.908741	7.57778	40.1557	2.36e-10	1.14e-08
AT5G15750	0.908214	3.18912	17.2809	3.23e-05	0.00058228
AT5G05880	0.907985	5.2135	36.8796	1.26e-09	5.47e-08
AT1G77640	0.906749	2.52645	12.5278	0.000401211	0.0051389
AT3G20380	0.905551	3.24156	17.5921	2.74e-05	0.000504665
AT5G54490	0.90546	3.95209	24.207	8.67e-07	2.32e-05
AT4G10240	0.904725	2.23664	10.7494	0.00104365	0.0113649
AT5G53420	0.902802	3.97237	24.2601	8.44e-07	2.26e-05
AT1G79430	0.902213	2.14734	10.2425	0.00137309	0.0142503
AT2G26700	0.901908	1.67752	7.91027	0.00491691	0.0400467
AT4G09570	0.901012	6.1323	38.2013	6.42e-10	2.89e-08
AT3G18580	0.900478	2.17788	10.3344	0.00130636	0.0136463
AT4G29360	0.899378	3.35331	18.3192	1.87e-05	0.000359642
AT1G28395	0.897893	2.31775	11.007	0.000908162	0.010129
AT2G35660	0.897511	1.83673	8.5663	0.00342558	0.030151
AT1G32990	0.897481	5.77055	37.5841	8.8e-10	3.87e-08
AT3G02060	0.896953	3.32666	17.9913	2.22e-05	0.000420706
AT1G68230	0.894445	2.26413	10.6666	0.00109141	0.0117932
AT3G24670	0.893496	5.1369	35.3617	2.75e-09	1.14e-07
AT5G38430	0.893206	5.02006	34.5629	4.15e-09	1.68e-07
AT5G47455	0.892406	1.64041	7.60139	0.00583392	0.0455292
AT1G08640	0.890796	4.05913	24.4799	7.53e-07	2.03e-05
AT1G61870	0.888302	3.32612	17.6868	2.61e-05	0.000483346
AT5G62270	0.888013	4.96463	33.9008	5.83e-09	2.3e-07
AT4G26600	0.887718	2.74224	13.3854	0.000253779	0.00347241
AT5G12300	0.887567	1.81295	8.25444	0.00406653	0.0346578
AT5G59980	0.886824	1.63474	7.50338	0.00615996	0.0475219
AT5G21100	0.885043	4.47153	28.8567	7.82e-08	2.56e-06
AT4G21310	0.884884	2.69152	12.9911	0.000313208	0.00415202
AT3G53540	0.884683	3.90996	22.7602	1.84e-06	4.59e-05
AT1G68570	0.884188	2.5016	11.771	0.000601977	0.00720935
AT5G48880	0.883333	1.83134	8.27222	0.00402689	0.0344072
AT1G18400	0.882397	4.77896	32.2815	1.34e-08	5e-07
AT5G14770	0.881183	1.69241	7.63702	0.00571979	0.0448678
AT3G10050	0.879487	3.15724	15.9697	6.44e-05	0.00106876
AT4G12750	0.879408	2.16122	9.80858	0.00173774	0.0173593
AT5G02600	0.877491	1.80577	8.04174	0.00457253	0.0379033
AT4G13210	0.877205	4.51936	28.9145	7.59e-08	2.49e-06
AT5G57280	0.876853	2.84104	13.6775	0.000217213	0.00303638
AT5G19160	0.874803	2.09498	9.37871	0.00219607	0.0210036
AT1G49975	0.874496	2.76369	13.1107	0.000293828	0.00392764
AT3G59890	0.874252	3.8335	21.497	3.55e-06	8.25e-05
AT2G32220	0.873533	2.707	12.745	0.000357219	0.00463667
AT4G37925	0.872855	2.27031	10.2098	0.00139759	0.0144511
AT3G53800	0.872147	2.84818	13.5903	0.000227533	0.00316615
AT5G06290	0.870983	4.89808	32.2331	1.37e-08	5.1e-07
AT5G24030	0.870739	5.1943	33.8924	5.85e-09	2.31e-07
AT1G71400	0.870298	1.91338	8.39891	0.00375567	0.0324612
AT5G49660	0.869934	3.06892	15.0241	0.000106248	0.00165147
AT5G45610	0.869546	2.4527	11.1268	0.000851337	0.00960684
AT1G60620	0.869169	2.52942	11.5877	0.000664266	0.00778607
AT5G11240	0.869136	3.20348	15.9999	6.34e-05	0.0010539
AT3G21300	0.868712	3.29772	16.698	4.39e-05	0.000764009
AT1G53490	0.868444	2.54379	11.6591	0.000639272	0.00754246
AT5G05540	0.868367	2.79324	13.1438	0.000288685	0.00386967
AT1G76500	0.867274	4.46188	27.6144	1.49e-07	4.6e-06
AT5G14600	0.867192	2.37399	10.5932	0.00113558	0.0121688
AT1G14030	0.865537	3.09619	15.0438	0.000105145	0.0016366
AT3G24560	0.864388	1.82146	7.89182	0.00496733	0.0403303
AT1G18100	0.861152	3.9654	22.0932	2.6e-06	6.23e-05
AT5G51440	0.861105	1.99524	8.62902	0.00330963	0.0292838
AT4G34420	0.860596	2.39757	10.5869	0.00113948	0.0121988
AT1G60850	0.860094	2.61973	11.8764	0.000568854	0.00687638
AT4G18810	0.859938	2.78169	12.812	0.00034464	0.00449947
AT3G60360	0.859563	3.07406	14.7227	0.00012465	0.00189718
AT1G61380	0.858127	3.47554	17.6483	2.66e-05	0.00049241
AT1G59990	0.857763	3.6792	19.314	1.11e-05	0.000228688
AT5G11480	0.857526	4.64497	29.0509	7.07e-08	2.33e-06
AT1G12250	0.857355	2.50999	11.1512	0.000840245	0.00950081
AT2G24260	0.855765	5.69325	34.158	5.1e-09	2.03e-07
AT5G46880	0.855668	3.1879	15.4269	8.58e-05	0.00137566
AT3G12090	0.855469	3.15782	15.1807	9.78e-05	0.00154
AT1G56020	0.855372	3.01671	14.1685	0.000167287	0.00242106
AT2G32230	0.855365	4.83647	30.7636	2.93e-08	1.03e-06
AT3G11210	0.852996	6.2545	34.3832	4.55e-09	1.83e-07
AT3G14570	0.852067	2.63321	11.7374	0.000612944	0.00730166
AT1G60060	0.851161	4.7335	29.617	5.28e-08	1.79e-06
AT2G28810	0.850536	3.02975	14.0912	0.000174303	0.00250855
AT5G34940	0.850135	6.41537	34.1876	5.03e-09	2.01e-07
AT2G24120	0.849116	3.52218	17.6937	2.6e-05	0.000481862
AT3G29185	0.84817	4.0153	21.9209	2.85e-06	6.77e-05
AT4G39955	0.848046	2.70178	12.0192	0.000526893	0.00642695
AT3G15360	0.847241	4.74312	29.4224	5.84e-08	1.96e-06
AT5G59080	0.847168	3.08922	14.409	0.000147225	0.00217473
AT5G22460	0.846301	3.46313	17.1004	3.55e-05	0.000634538
AT1G55040	0.845121	1.9078	7.94963	0.00481114	0.0394434
AT1G28520	0.844197	5.09803	31.3978	2.11e-08	7.59e-07
AT3G46210	0.843606	2.38428	10.1259	0.00146269	0.0149951
AT2G24800	0.843514	3.32633	15.9921	6.37e-05	0.00105719
AT4G10380	0.843089	5.85296	33.3557	7.71e-09	2.98e-07
AT2G28600	0.842723	3.54848	17.5761	2.76e-05	0.000507811
AT5G38410	0.842427	8.67963	34.6954	3.87e-09	1.58e-07
AT4G04670	0.842404	2.90536	13.0507	0.000303388	0.00404097
AT2G36090	0.840621	3.66653	18.4598	1.74e-05	0.00033715
AT1G24530	0.840037	3.57967	17.6485	2.66e-05	0.00049241
AT1G52930	0.840022	3.57156	17.6301	2.69e-05	0.000496331
AT3G47340	0.839922	4.49508	26.3326	2.88e-07	8.39e-06
AT3G01970	0.839734	2.94686	13.2036	0.000279617	0.00377068
AT5G39960	0.839536	2.00363	8.2572	0.00406034	0.0346138
AT1G68620	0.839525	3.34723	15.9959	6.35e-05	0.0010556
AT5G14100	0.838366	1.89102	7.72265	0.00545473	0.0433492
AT1G07440	0.836769	3.23615	15.097	0.000102221	0.0015995
AT4G05440	0.836362	2.29423	9.50407	0.002051	0.0198914
AT2G25420	0.835761	2.17996	9.01037	0.00268551	0.0247998
AT1G49650	0.835471	2.9629	13.1501	0.000287711	0.00385968
AT3G03630	0.835305	2.62901	11.2891	0.000780062	0.00892847
AT5G58260	0.834976	2.31682	9.60485	0.00194144	0.0190544
AT4G29190	0.834557	4.26536	23.571	1.21e-06	3.14e-05
AT3G04550	0.83442	4.14026	22.3496	2.28e-06	5.54e-05
AT4G34290	0.834026	4.13349	22.2299	2.42e-06	5.86e-05
AT3G01480	0.833264	4.59381	26.954	2.09e-07	6.26e-06
AT2G28450	0.83291	3.81232	19.3923	1.07e-05	0.000220715
AT1G10140	0.83287	4.77538	28.789	8.1e-08	2.64e-06
AT1G68080	0.832508	2.23254	9.14052	0.00250104	0.0233595
AT4G14070	0.831994	3.69419	18.344	1.85e-05	0.000355788
AT5G26622	0.83039	2.52714	10.585	0.00114068	0.0122078
AT1G27470	0.830072	3.99122	20.7953	5.12e-06	0.000114702
AT2G43560	0.829875	3.53653	16.9627	3.82e-05	0.000676112
AT3G27220	0.82933	3.77324	18.8861	1.39e-05	0.000278599
AT3G49660	0.829274	2.00339	8.05492	0.00453939	0.037675
AT1G27480	0.826123	2.01037	8.048	0.00455676	0.0377912
AT5G16620	0.825762	5.12412	30.213	3.89e-08	1.35e-06
AT5G02750	0.823028	3.22898	14.5722	0.000135008	0.00202271
AT1G55810	0.821995	4.1817	22.0329	2.69e-06	6.42e-05
AT4G01990	0.821899	1.8969	7.47545	0.00625623	0.0481982
AT3G22310	0.821791	3.80613	18.8525	1.41e-05	0.000282901
AT1G74880	0.821503	3.53042	16.5559	4.73e-05	0.000817905
AT2G45100	0.820491	1.94093	7.64646	0.00568994	0.0446649
AT1G80620	0.819378	4.12964	21.4531	3.63e-06	8.44e-05
AT4G19840	0.819286	3.64794	17.4367	2.97e-05	0.000542296
AT2G36120	0.81832	5.16977	29.9307	4.49e-08	1.54e-06
AT1G15730	0.817554	3.56715	16.7286	4.32e-05	0.000752555
AT2G45340	0.816669	2.45908	9.91273	0.00164211	0.0165865
AT5G15210	0.816073	4.90397	28.4303	9.74e-08	3.14e-06
AT3G59680	0.815613	2.00836	7.8416	0.00510719	0.0412565
AT3G18420	0.814724	3.65849	17.294	3.21e-05	0.000578914
AT4G24930	0.81472	3.30365	14.8004	0.000119619	0.00183715
AT3G25480	0.814413	3.57302	16.5769	4.68e-05	0.000810171
AT3G53560	0.814087	4.47324	24.5383	7.3e-07	1.97e-05
AT3G23620	0.813315	4.90732	28.2431	1.07e-07	3.43e-06
AT1G29940	0.812936	3.67813	17.415	3.01e-05	0.000547916
AT1G35420	0.810343	3.27512	14.4559	0.000143603	0.00212777
AT4G27490	0.810254	2.07479	8.01286	0.00464601	0.038361
AT5G08180	0.809713	4.74419	26.9392	2.11e-07	6.3e-06
AT3G08920	0.809392	2.52508	10.0662	0.00151086	0.0154089
AT5G39610	0.808978	4.1694	21.2453	4.05e-06	9.29e-05
AT5G61880	0.808903	2.25266	8.75206	0.00309361	0.0277599
AT1G60230	0.808618	2.96287	12.3372	0.000444301	0.00557741
AT1G73850	0.808396	2.32068	9.04318	0.00263774	0.0244325
AT1G62780	0.808018	4.23182	21.7869	3.05e-06	7.2e-05
AT4G39470	0.806634	2.0879	8.00966	0.00465423	0.03841
AT5G36950	0.806361	2.77971	11.3398	0.00075905	0.00874654
AT1G06560	0.805781	2.35435	9.1371	0.00250572	0.0233967
AT3G17465	0.805274	3.85217	18.4729	1.73e-05	0.000335035
AT2G37220	0.804851	7.83476	31.7395	1.77e-08	6.47e-07
AT5G54910	0.804766	2.80605	11.4203	0.000726873	0.00842295
AT1G32930	0.80474	4.05434	20.1106	7.32e-06	0.000157509
AT5G56790	0.804404	2.61569	10.4169	0.00124927	0.0131357
AT5G11790	0.803189	5.6079	30.0958	4.13e-08	1.42e-06
AT3G57000	0.802194	3.89446	18.7035	1.53e-05	0.000302818
AT1G64150	0.801577	2.47621	9.63014	0.00191489	0.0188378
AT5G27395	0.799963	3.56562	16.0353	6.22e-05	0.00104003
AT3G57940	0.798209	2.84187	11.4279	0.000723902	0.00839431
AT5G49630	0.797943	4.74191	26.1953	3.09e-07	8.95e-06
AT3G21540	0.797605	3.36812	14.6236	0.000131381	0.00198163
AT3G58220	0.797286	3.07617	12.7551	0.000355288	0.00461705
AT3G48200	0.795431	2.70894	10.6576	0.00109672	0.0118391
AT5G17170	0.794643	3.12431	12.956	0.000319128	0.00422216
AT2G26440	0.794433	5.23481	28.5136	9.33e-08	3.02e-06
AT1G53120	0.794126	2.78634	11.0263	0.000898777	0.0100464
AT2G36485	0.790503	2.44882	9.22299	0.00239086	0.0224992
AT2G41550	0.790396	2.03168	7.47966	0.00624163	0.0480968
AT4G06701	0.790251	2.43752	9.18043	0.0024471	0.0229514
AT3G01160	0.789253	3.81983	17.5606	2.79e-05	0.000511686
AT2G19250	0.789097	2.09665	7.71155	0.00548839	0.0434672
AT3G10720	0.788584	6.6211	29.536	5.51e-08	1.86e-06
AT1G69200	0.788513	3.8002	17.3525	3.11e-05	0.000564091
AT3G27906	0.788022	2.09297	7.68802	0.0055604	0.0438426
AT1G67148	0.78553	4.41812	22.332	2.3e-06	5.58e-05
AT2G04530	0.785465	2.92859	11.5132	0.000691435	0.00807074
AT5G17760	0.785027	3.44939	14.6766	0.000127738	0.00193275
AT2G47590	0.78478	5.4125	28.5332	9.24e-08	2.99e-06
AT5G66920	0.784732	8.0357	30.2155	3.88e-08	1.35e-06
AT5G53830	0.783605	3.96098	18.3639	1.83e-05	0.000352522
AT3G11660	0.783234	4.35533	21.6808	3.23e-06	7.54e-05
AT3G17680	0.782305	3.53692	15.1405	9.99e-05	0.00156876
AT2G40700	0.782296	3.16249	12.8152	0.000344065	0.00449545
AT3G07420	0.782194	3.32069	13.7843	0.000205207	0.00288627
AT1G19900	0.78074	5.82434	28.6631	8.64e-08	2.81e-06
AT1G32200	0.780174	4.28169	20.8361	5.01e-06	0.000112511
AT1G18850	0.780069	2.27339	8.23873	0.00410187	0.0348177
AT2G34050	0.779957	3.58481	15.3653	8.87e-05	0.00141179
AT1G15380	0.778635	2.07003	7.4077	0.0064962	0.0496711
AT1G35310	0.778564	2.11439	7.5717	0.00593079	0.0461566
AT1G09290	0.778429	2.59855	9.69126	0.00185225	0.018345
AT2G18196	0.778165	2.17296	7.80146	0.00522188	0.0419711
AT1G49130	0.778094	2.67286	10.0653	0.00151153	0.0154111
AT3G57150	0.777554	5.59654	28.2366	1.08e-07	3.44e-06
AT5G38720	0.777446	3.19692	12.8706	0.000334014	0.00438288
AT1G60600	0.776408	3.42214	14.1909	0.00016531	0.00239656
AT3G58930	0.776405	2.12879	7.6058	0.00581965	0.0454747
AT1G02870	0.775252	3.68688	15.9378	6.55e-05	0.00108174
AT5G15810	0.774623	4.50829	22.6108	1.99e-06	4.93e-05
AT3G15353	0.774217	5.15219	26.7517	2.32e-07	6.88e-06
AT4G11175	0.772987	3.0713	11.953	0.000545946	0.00662808
AT5G57345	0.77127	2.41786	8.6392	0.00329118	0.0291513
AT3G22150	0.770937	2.67541	9.89286	0.00165994	0.0167334
AT1G64770	0.770387	3.14677	12.333	0.000445306	0.00558695
AT5G44660	0.770333	2.82566	10.5787	0.00114456	0.0122376
AT5G23310	0.769177	4.85427	25.0859	5.5e-07	1.52e-05
AT1G06720	0.768836	3.77773	16.3533	5.26e-05	0.000899033
AT2G40360	0.768558	5.52189	27.5321	1.55e-07	4.76e-06
AT3G53130	0.767986	3.18756	12.4932	0.000408715	0.00521841
AT4G36010	0.767479	4.98321	25.5539	4.31e-07	1.22e-05
AT4G36680	0.767349	2.97281	11.2135	0.000812497	0.00923034
AT2G31150	0.767133	2.14735	7.48762	0.00621409	0.0479065
AT3G16250	0.766848	2.69227	9.84591	0.00170283	0.017057
AT1G60640	0.766763	3.63447	15.24	9.48e-05	0.00149724
AT1G65920	0.765712	5.65852	27.4838	1.59e-07	4.86e-06
AT3G26710	0.765617	4.10418	18.6174	1.6e-05	0.000314027
AT5G63650	0.765475	7.44594	28.5886	8.98e-08	2.91e-06
AT5G18760	0.765439	3.38979	13.6534	0.000220022	0.00307436
AT1G02475	0.765349	2.64243	9.59207	0.001955	0.0191594
AT2G25900	0.764844	5.18362	26.267	2.98e-07	8.64e-06
AT2G04039	0.764725	2.71055	9.87004	0.00168065	0.0168945
AT3G60510	0.76428	3.28944	12.9757	0.000315785	0.00418287
AT2G05300	0.763714	2.21868	7.71604	0.00547475	0.0434322
AT2G35410	0.763436	4.57479	22.5563	2.04e-06	5.05e-05
AT4G28320	0.763161	4.13204	18.6897	1.54e-05	0.000304487
AT3G06930	0.763035	4.03575	18.008	2.2e-05	0.000417736
AT1G66140	0.762778	3.17231	12.2491	0.000465783	0.00580157
AT5G05160	0.762045	4.25413	19.6782	9.18e-06	0.000193022
AT5G61770	0.761952	3.64082	15.0777	0.000103273	0.00161193
AT1G33060	0.761372	3.0092	11.2807	0.000783613	0.00896382
AT4G27310	0.761303	5.26405	26.3377	2.87e-07	8.37e-06
AT5G64440	0.760768	6.21267	27.4597	1.61e-07	4.9e-06
AT2G17640	0.760576	3.55233	14.4295	0.000145633	0.002155
AT3G48500	0.760576	4.81827	24.3996	7.85e-07	2.11e-05
AT3G04710	0.760519	3.47556	13.9785	0.000185068	0.00264132
AT1G15440	0.760471	3.67906	15.3027	9.17e-05	0.00145459
AT1G68990	0.760096	3.10069	11.7596	0.000605672	0.00724327
AT5G49560	0.759941	2.44054	8.51285	0.00352764	0.0308553
AT4G16480	0.759357	2.25571	7.75884	0.00534651	0.0427683
AT1G03730	0.759063	3.95066	17.1622	3.44e-05	0.000616196
AT3G53460	0.758471	8.23995	28.2558	1.07e-07	3.41e-06
AT5G63850	0.758043	3.86962	16.5858	4.66e-05	0.000807198
AT2G16370	0.757937	4.77457	23.9883	9.71e-07	2.56e-05
AT2G21960	0.757669	2.67008	9.51871	0.0020347	0.0197905
AT1G31350	0.757368	2.6859	9.5869	0.00196051	0.0191855
AT1G32240	0.75617	2.66436	9.47542	0.00208327	0.0201347
AT4G15540	0.755861	3.37556	13.1884	0.000281893	0.00379818
AT5G40530	0.755594	2.53797	8.87778	0.00288766	0.0262713
AT2G20850	0.754267	3.00141	11.014	0.000904742	0.0101043
AT4G21770	0.753985	3.30045	12.7064	0.000364665	0.00472238
AT5G05740	0.753828	4.62451	22.4389	2.17e-06	5.32e-05
AT1G61990	0.753648	2.35132	7.99794	0.00468445	0.038593
AT2G04540	0.753617	3.28933	12.6309	0.000379674	0.00489598
AT2G26930	0.752847	3.45322	13.574	0.000229523	0.00318987
AT5G56890	0.752627	4.97976	24.6209	7e-07	1.9e-05
AT2G39670	0.752269	4.63784	22.4731	2.14e-06	5.24e-05
AT2G31170	0.751843	3.14325	11.7478	0.000609529	0.00727355
AT1G28190	0.751393	2.36488	8.00544	0.00466508	0.0384712
AT3G07770	0.750991	4.70339	22.9665	1.65e-06	4.16e-05
AT3G58470	0.750324	3.01265	10.9522	0.000935409	0.0103816
AT3G11180	0.748649	2.31295	7.74606	0.00538448	0.0429901
AT2G30695	0.746479	3.82711	15.7907	7.08e-05	0.00115645
AT2G37230	0.746282	3.69587	14.8755	0.000114952	0.00177771
AT4G01510	0.745652	2.53976	8.67771	0.00322236	0.0286778
AT4G14640	0.745143	4.30739	19.2632	1.14e-05	0.000234417
AT5G53070	0.745072	3.23519	12.0573	0.000516213	0.00631961
AT1G71380	0.744436	2.38815	7.97054	0.00475588	0.0390571
AT1G53340	0.744197	3.09627	11.2651	0.000790231	0.00902948
AT1G67870	0.742058	2.48886	8.3664	0.00382345	0.0329201
AT4G23540	0.741707	2.59137	8.79833	0.00301613	0.0272157
AT4G28200	0.741116	3.89277	16.0273	6.25e-05	0.00104237
AT1G51100	0.740917	2.50412	8.38726	0.00377982	0.032628
AT5G67240	0.740658	4.06448	17.2119	3.35e-05	0.000602194
AT4G03470	0.740587	2.64101	8.99724	0.00270486	0.0249169
AT4G01037	0.740437	3.64175	14.2837	0.000157354	0.00230008
AT2G43610	0.740188	4.17896	17.9586	2.26e-05	0.000426311
AT5G51670	0.739839	5.37201	25.3263	4.85e-07	1.36e-05
AT1G55490	0.739801	7.46814	26.741	2.33e-07	6.9e-06
AT1G16350	0.737485	5.4107	25.25	5.05e-07	1.41e-05
AT1G04620	0.737277	4.40279	19.6683	9.23e-06	0.000193901
AT4G28350	0.73612	2.49112	8.24499	0.00408774	0.0347488
AT5G16240	0.735918	2.75082	9.36042	0.00221809	0.0211638
AT4G35970	0.734728	2.41561	7.88714	0.00498017	0.0403956
AT2G41010	0.734625	3.04643	10.6899	0.00107774	0.011668
AT3G56400	0.73437	3.00509	10.4615	0.00121948	0.0128869
AT5G26180	0.733867	3.16972	11.3627	0.00074975	0.00864928
AT5G46580	0.733766	4.04499	16.738	4.3e-05	0.000750024
AT5G48220	0.73346	3.21463	11.5703	0.000670508	0.00784556
AT4G20270	0.733283	4.8941	23.0191	1.61e-06	4.06e-05
AT1G69750	0.733091	2.86444	9.7681	0.00177641	0.0177088
AT1G77550	0.732892	3.57971	13.5918	0.000227352	0.00316494
AT5G18790	0.732444	2.30258	7.41801	0.00645908	0.0494548
AT5G48240	0.732356	3.8097	15.092	0.000102496	0.00160278
AT3G51870	0.732064	3.39841	12.54	0.000398609	0.00511074
AT5G21160	0.732027	5.00988	23.431	1.3e-06	3.33e-05
AT5G23300	0.730943	3.44212	12.7783	0.000350905	0.00457415
AT3G15840	0.730933	2.48308	8.10015	0.0044275	0.036938
AT3G03040	0.730708	3.50601	13.0943	0.000296415	0.00395908
AT3G13470	0.73066	5.81643	25.1816	5.23e-07	1.45e-05
AT1G72320	0.7305	4.34434	18.8314	1.43e-05	0.0002852
AT1G54790	0.730277	2.34751	7.51602	0.00611687	0.0472655
AT4G25990	0.730106	2.39803	7.71738	0.00547068	0.0434102
AT1G74970	0.729925	5.8257	25.1218	5.4e-07	1.49e-05
AT4G32320	0.729707	2.7431	9.17768	0.00245077	0.0229602
AT1G03630	0.729541	4.3379	18.741	1.5e-05	0.000297478
AT5G52960	0.729534	3.11963	10.9537	0.000934684	0.0103811
AT4G05410	0.729162	3.12369	10.9638	0.00092957	0.0103368
AT3G13740	0.728605	3.16902	11.1842	0.000825432	0.00935536
AT1G32380	0.728588	3.0232	10.4057	0.00125688	0.0132075
AT3G07440	0.728553	2.41428	7.75315	0.00536339	0.0428643
AT1G06690	0.728156	2.89922	9.81711	0.0017297	0.0172893
AT4G22380	0.728023	3.34014	12.0784	0.000510424	0.00625786
AT2G39730	0.727752	7.32564	25.8102	3.78e-07	1.08e-05
AT3G06530	0.726917	3.87924	15.3415	8.98e-05	0.00142836
AT1G44575	0.72648	6.42868	25.1084	5.43e-07	1.5e-05
AT2G04030	0.726212	6.49976	25.1049	5.44e-07	1.51e-05
AT1G56110	0.726162	6.00003	24.9751	5.82e-07	1.6e-05
AT2G43650	0.725936	3.71193	14.2151	0.0001632	0.00237212
AT2G02100	0.725238	7.80124	25.8303	3.74e-07	1.07e-05
AT5G45020	0.725167	2.84176	9.48761	0.00206947	0.0200186
AT4G01850	0.725101	9.83117	25.4684	4.51e-07	1.27e-05
AT4G27440	0.72471	9.35253	25.6079	4.19e-07	1.19e-05
AT2G45000	0.723836	3.69208	13.9913	0.00018381	0.00262973
AT5G48470	0.723605	2.42735	7.70156	0.00551882	0.0436171
AT1G63780	0.722985	3.43624	12.4348	0.000421692	0.0053435
AT5G55280	0.721432	3.67173	13.7892	0.000204678	0.00288033
AT4G24810	0.720848	2.70283	8.78667	0.00303546	0.0273403
AT2G04800	0.720809	2.94827	9.81977	0.0017272	0.0172695
AT5G13330	0.719894	4.39374	18.6652	1.56e-05	0.0003077
AT1G25260	0.719692	5.10474	23.0211	1.61e-06	4.06e-05
AT1G45332	0.719064	4.1379	16.7047	4.37e-05	0.000761713
AT3G25890	0.718995	2.93837	9.73058	0.00181304	0.0180258
AT1G27570	0.718503	2.67837	8.65426	0.00326409	0.0289725
AT2G29500	0.718179	2.59307	8.26697	0.00403854	0.0344893
AT3G52380	0.717265	5.27914	23.5135	1.24e-06	3.22e-05
AT5G45140	0.717013	3.1562	10.8034	0.00101367	0.0110779
AT4G02330	0.716753	5.55573	24.0257	9.53e-07	2.52e-05
AT5G27000	0.716033	3.95364	15.3672	8.86e-05	0.00141106
AT4G34740	0.71539	3.83713	14.5968	0.000133259	0.00200186
AT4G28450	0.71504	3.15793	10.7248	0.00105764	0.0114874
AT5G08540	0.714899	4.02204	15.7617	7.19e-05	0.00117091
AT3G14595	0.71472	5.98923	24.178	8.8e-07	2.34e-05
AT5G27120	0.714223	4.48507	19.1307	1.22e-05	0.000248985
AT3G10405	0.713941	3.228	11.0442	0.00089011	0.00997072
AT2G48120	0.713769	3.0943	10.3795	0.00127485	0.0133629
AT2G39795	0.713493	2.51259	7.84048	0.00511036	0.0412722
AT4G37510	0.713399	4.98905	22.1988	2.46e-06	5.94e-05
AT1G71260	0.713226	3.66394	13.4037	0.000251316	0.00344573
AT3G13940	0.71313	3.192	10.8464	0.00099038	0.0108551
AT2G17250	0.713101	3.86938	14.7122	0.000125346	0.00190514
AT2G42120	0.713078	2.64643	8.37033	0.00381519	0.0328658
AT2G46915	0.712796	3.49138	12.3849	0.000433097	0.00544898
AT5G14050	0.712289	3.97672	15.3621	8.88e-05	0.00141357
AT1G07780	0.711081	2.63252	8.26613	0.00404042	0.0344965
AT1G07280	0.710853	3.46051	12.1591	0.000488808	0.00604074
AT2G21790	0.710533	4.79666	21.2649	4.01e-06	9.22e-05
AT2G34640	0.710416	4.81862	21.3502	3.83e-06	8.86e-05
AT1G14620	0.71009	3.87494	14.6006	0.000132993	0.00199876
AT5G25350	0.709949	7.29672	24.5613	7.22e-07	1.95e-05
AT3G15590	0.709524	3.68542	13.4117	0.000250258	0.00343402
AT4G22280	0.70935	2.66981	8.38277	0.00378918	0.0326836
AT3G15354	0.709293	3.44401	12.04	0.000521023	0.00637386
AT2G28790	0.708458	2.84646	9.09004	0.00257101	0.0239265
AT3G55400	0.708396	4.07062	15.808	7.02e-05	0.00114705
AT2G29660	0.707949	4.98654	21.8495	2.95e-06	7e-05
AT1G34418	0.707938	2.98238	9.65468	0.00188948	0.0186206
AT5G14910	0.707352	5.94391	23.6788	1.14e-06	2.98e-05
AT1G60700	0.707198	2.4722	7.56043	0.00596796	0.0463707
AT4G30720	0.70691	5.26223	22.8091	1.79e-06	4.48e-05
AT2G01950	0.706666	4.31056	17.4025	3.03e-05	0.000550945
AT5G06690	0.706156	2.87496	9.14074	0.00250074	0.0233595
AT1G76405	0.705473	2.90155	9.23021	0.00238146	0.022417
AT1G79700	0.705272	4.02952	15.3924	8.74e-05	0.00139662
AT5G37180	0.705145	2.44473	7.39525	0.00654132	0.0499548
AT4G19380	0.705129	5.8549	23.4968	1.25e-06	3.24e-05
AT1G50420	0.704847	4.53136	18.9582	1.34e-05	0.000269754
AT2G19385	0.704837	2.60635	8.03569	0.00458781	0.0380112
AT5G52470	0.704832	5.97114	23.5392	1.23e-06	3.18e-05
AT1G08550	0.704118	2.96438	9.46393	0.00209635	0.0202379
AT1G75690	0.703398	2.92988	9.29737	0.00229573	0.0217441
AT4G28030	0.703315	3.92918	14.7039	0.000125899	0.00191095
AT3G59100	0.702862	4.05815	15.479	8.35e-05	0.00134341
AT4G03280	0.702543	6.15591	23.4614	1.28e-06	3.28e-05
AT5G42765	0.702385	2.74988	8.55608	0.00344485	0.030281
AT4G32460	0.70229	9.64129	23.9721	9.8e-07	2.58e-05
AT5G14370	0.702247	3.41938	11.6832	0.000631029	0.00746695
AT4G12800	0.701945	6.35741	23.4556	1.28e-06	3.29e-05
AT3G23940	0.701772	4.76511	20.5569	5.8e-06	0.00012803
AT4G04040	0.701158	5.5029	22.9624	1.66e-06	4.16e-05
AT5G16930	0.701133	2.54509	7.69093	0.00555144	0.0438131
AT4G11610	0.701039	5.61362	23.072	1.56e-06	3.96e-05
AT3G56160	0.699944	3.27777	10.8958	0.000964352	0.01062
AT2G21440	0.698388	3.99249	14.8821	0.000114552	0.00177316
AT3G14390	0.698051	4.16683	15.9444	6.53e-05	0.00107936
AT1G67720	0.69675	2.86637	8.86845	0.00290245	0.0263827
AT5G47110	0.696514	7.30115	23.6562	1.15e-06	3.01e-05
AT3G04760	0.696403	3.2392	10.6015	0.00113053	0.0121224
AT5G07900	0.696263	2.68199	8.14412	0.00432141	0.0362328
AT5G58370	0.695809	2.71158	8.24993	0.00407663	0.034709
AT1G70710	0.695472	6.13748	22.9896	1.63e-06	4.11e-05
AT5G13410	0.695404	2.60934	7.81474	0.00518365	0.0417538
AT5G39890	0.695369	3.49257	11.8104	0.000589377	0.00708116
AT4G20020	0.695057	3.82433	13.7173	0.000212654	0.00298381
AT2G25790	0.694999	3.61054	12.4294	0.000422899	0.00535397
AT4G26430	0.694812	3.22784	10.4716	0.0012128	0.0128326
AT1G24310	0.694573	3.64735	12.6434	0.000377145	0.00486711
AT4G30930	0.694572	3.54672	12.0628	0.000514712	0.00630353
AT4G26370	0.694145	4.21972	16.1373	5.9e-05	0.000992961
AT3G60620	0.693765	3.27864	10.724	0.00105809	0.0114886
AT1G73060	0.693549	4.93252	20.7863	5.14e-06	0.000115088
AT3G53200	0.6934	4.91552	20.708	5.36e-06	0.000119174
AT4G31210	0.69268	3.70122	12.898	0.000329164	0.00433446
AT5G06060	0.692655	3.323	10.8951	0.000964671	0.01062
AT5G54190	0.692528	8.79331	23.5423	1.22e-06	3.18e-05
AT4G01560	0.692476	4.23866	16.183	5.76e-05	0.000973623
AT5G58480	0.692365	2.80663	8.54032	0.0034748	0.0305043
AT1G32080	0.692313	4.06484	15.0535	0.000104605	0.0016297
AT3G08740	0.692202	5.63234	22.4886	2.12e-06	5.2e-05
AT3G16810	0.691319	3.63854	12.4641	0.000415125	0.0052842
AT1G53035	0.690801	4.45126	17.6186	2.7e-05	0.000498503
AT5G48450	0.690405	4.85558	20.3015	6.63e-06	0.000143933
AT4G22840	0.690365	4.13164	15.3903	8.75e-05	0.00139662
AT1G66730	0.689797	3.19625	10.2113	0.00139645	0.0144482
AT3G14260	0.689159	2.91819	8.87065	0.00289896	0.0263603
AT5G16540	0.688352	2.61371	7.69397	0.00554208	0.0437701
AT2G27140	0.688291	2.98693	9.15206	0.00248533	0.0232386
AT5G23380	0.687972	3.69755	12.6901	0.000367844	0.00475805
AT3G25400	0.687937	3.28977	10.578	0.00114499	0.0122384
AT1G70200	0.687935	4.34728	16.7548	4.26e-05	0.000744545
AT1G23090	0.687624	6.57661	22.5269	2.08e-06	5.11e-05
AT3G48580	0.687454	2.90825	8.79007	0.00302981	0.0273113
AT3G63490	0.68698	6.5886	22.4894	2.12e-06	5.2e-05
AT5G66055	0.686717	4.37049	16.8784	3.99e-05	0.000703106
AT5G24840	0.686613	3.35706	10.8901	0.000967313	0.0106439
AT5G61330	0.686306	3.6577	12.3915	0.00043157	0.00543752
AT5G55120	0.686158	5.00173	20.6125	5.63e-06	0.000124611
AT4G15560	0.685683	6.2126	22.3723	2.25e-06	5.49e-05
AT1G74850	0.685335	3.76915	13.0343	0.000306054	0.00407163
AT3G47520	0.68524	6.12761	22.3172	2.32e-06	5.62e-05
AT1G58602	0.685112	3.91897	13.8953	0.000193442	0.00274519
AT3G02550	0.68459	4.06739	14.7406	0.000123473	0.00188605
AT1G14270	0.683723	3.73463	12.7551	0.000355295	0.00461705
AT1G33265	0.682863	4.31125	16.2494	5.56e-05	0.000942984
AT2G19640	0.682733	2.57237	7.41629	0.00646526	0.0494909
AT1G36280	0.682366	2.77366	8.16191	0.00427925	0.0359642
AT1G30680	0.682124	2.92317	8.73691	0.00311941	0.0279392
AT5G48480	0.682094	4.25661	15.84	6.9e-05	0.00113056
AT5G57960	0.681419	3.77412	12.9007	0.000328691	0.00432994
AT1G31660	0.681196	3.67078	12.2802	0.000458082	0.00572049
AT3G59780	0.6811	4.24334	15.7287	7.32e-05	0.00119033
AT4G34910	0.680752	3.45879	11.1806	0.000827001	0.00936998
AT3G15000	0.680619	5.9518	21.9578	2.79e-06	6.65e-05
AT3G09780	0.680371	3.91343	13.6789	0.000217054	0.00303542
AT1G01640	0.680017	2.83147	8.31577	0.00393147	0.0336776
AT2G16770	0.679155	2.62447	7.539	0.00603937	0.0468065
AT3G23990	0.679107	6.00013	21.8852	2.9e-06	6.88e-05
AT3G16140	0.678934	4.40963	16.7456	4.28e-05	0.000747417
AT4G25120	0.678581	2.90693	8.59158	0.00337834	0.0298055
AT5G19200	0.678268	3.53002	11.4229	0.000725854	0.00841404
AT1G55890	0.678091	2.84389	8.33015	0.00390049	0.033489
AT2G47990	0.677925	3.01422	8.99907	0.00270216	0.0249057
AT2G44920	0.677779	3.48767	11.2129	0.000812754	0.00923034
AT5G08620	0.676826	3.31264	10.3583	0.00128954	0.0134999
AT4G01600	0.676508	2.64352	7.55134	0.00599813	0.0465191
AT1G60080	0.674386	2.81907	8.16152	0.00428015	0.0359642
AT5G04140	0.674321	5.29631	20.88	4.9e-06	0.000110181
AT3G06980	0.672875	4.48471	17.013	3.72e-05	0.000660896
AT4G20130	0.672627	4.32757	15.9166	6.63e-05	0.00109215
AT4G26780	0.67255	2.92893	8.49665	0.00355919	0.031107
AT4G34900	0.672169	5.1805	20.3866	6.34e-06	0.000138665
AT2G47450	0.672145	4.67013	18.223	1.97e-05	0.000376115
AT4G08170	0.671458	3.83611	12.8785	0.000332614	0.00436792
AT3G56910	0.669874	6.05227	21.3112	3.91e-06	9.03e-05
AT1G75240	0.669554	5.02347	19.7041	9.06e-06	0.000190786
AT2G37025	0.669243	3.79491	12.5717	0.000391897	0.00503621
AT4G04640	0.668949	5.66813	21.0603	4.46e-06	0.000101306
AT4G28850	0.668527	5.91981	21.1799	4.19e-06	9.57e-05
AT1G03960	0.667643	2.82604	8.01103	0.00465072	0.0383904
AT3G16840	0.667156	4.20315	14.838	0.000117261	0.0018051
AT3G47650	0.666866	5.08752	19.7547	8.82e-06	0.000186262
AT1G20370	0.666644	3.12074	9.19314	0.00243016	0.0228122
AT2G36070	0.66652	4.12538	14.3409	0.000152646	0.002241
AT3G25410	0.665213	3.71567	11.9931	0.000534322	0.00650341
AT3G23810	0.665142	8.28801	21.7928	3.04e-06	7.18e-05
AT3G44070	0.663826	2.75985	7.69023	0.00555359	0.0438198
AT3G15520	0.663322	3.34131	10.0914	0.00149028	0.0152314
AT1G18570	0.663032	3.16821	9.30411	0.0022873	0.0216873
AT4G38890	0.662908	4.03943	13.6871	0.000216108	0.00302614
AT1G30210	0.662272	3.3324	10.0259	0.00154424	0.0157159
AT1G77122	0.66185	2.91839	8.21951	0.00414553	0.035082
AT5G66540	0.661722	3.97209	13.2888	0.000267191	0.00362976
AT5G14800	0.661233	6.29776	20.8396	5e-06	0.000112379
AT4G34020	0.661232	4.07712	13.8568	0.000197446	0.00279494
AT1G24370	0.660717	5.11251	19.4781	1.02e-05	0.00021207
AT5G19120	0.660711	5.84129	20.6538	5.51e-06	0.000122271
AT1G34360	0.660493	3.13105	9.05016	0.00262769	0.0243663
AT3G63200	0.660207	6.19228	20.7582	5.22e-06	0.000116631
AT4G34830	0.658605	3.99629	13.2886	0.000267223	0.00362976
AT5G52380	0.658392	2.73097	7.47057	0.00627321	0.0482958
AT3G23430	0.658191	6.63874	20.6991	5.38e-06	0.000119651
AT2G05310	0.657194	2.96509	8.25998	0.00405414	0.034581
AT5G14660	0.655946	3.72105	11.6981	0.000626015	0.00741523
AT3G57470	0.65561	3.56771	10.8719	0.000976846	0.0107383
AT3G05020	0.655286	6.29244	20.472	6.06e-06	0.00013348
AT4G29070	0.655086	2.93929	8.11795	0.00438424	0.0366498
AT4G24770	0.654626	7.22883	20.8873	4.88e-06	0.000109909
AT5G65860	0.653893	3.3314	9.77204	0.00177261	0.0176796
AT2G43110	0.653606	3.03253	8.46814	0.0036154	0.0314511
AT2G36890	0.653491	5.06201	18.8995	1.38e-05	0.00027701
AT3G11650	0.653434	4.05915	13.4283	0.000248041	0.00340777
AT5G27390	0.652708	3.28038	9.50759	0.00204706	0.0198602
AT4G02930	0.650093	5.56132	19.8457	8.41e-06	0.000178955
AT4G02715	0.649753	5.1927	19.0995	1.24e-05	0.000252319
AT5G41190	0.649694	4.31395	14.752	0.000122729	0.00187725
AT5G28290	0.64961	3.87513	12.2836	0.000457247	0.00571219
AT5G65480	0.649538	7.23434	20.5697	5.76e-06	0.000127261
AT5G46080	0.649435	3.03739	8.37285	0.0038099	0.0328287
AT5G55220	0.648858	5.94091	19.9883	7.8e-06	0.000166942
AT4G10450	0.648229	4.1929	13.9125	0.00019168	0.00272479
AT2G38080	0.647984	4.71958	17.2966	3.2e-05	0.000578418
AT3G22300	0.647923	4.47372	15.6907	7.47e-05	0.0012116
AT1G80750	0.647812	5.04385	18.5447	1.66e-05	0.000324722
AT5G62620	0.646202	3.34332	9.59971	0.00194688	0.0190966
AT5G57180	0.64597	4.43223	15.3684	8.85e-05	0.00141083
AT2G36080	0.645044	4.92334	18.0033	2.21e-05	0.000418534
AT1G32450	0.644589	7.4014	20.3409	6.49e-06	0.000141367
AT5G64420	0.644572	4.40919	15.149	9.94e-05	0.0015631
AT1G68890	0.6441	3.84571	11.9364	0.000550805	0.00667741
AT2G28780	0.644095	3.28006	9.26771	0.00233319	0.0220291
AT5G51220	0.643868	3.50887	10.2141	0.00139434	0.0144352
AT5G63420	0.643765	4.40937	15.1234	0.000100803	0.00158146
AT1G66180	0.643714	8.18276	20.4259	6.21e-06	0.000136247
AT5G47060	0.643395	5.21253	18.8028	1.45e-05	0.000289163
AT5G57170	0.64324	2.91152	7.73794	0.00540875	0.0431531
AT1G52150	0.643089	4.50468	15.6668	7.56e-05	0.00122518
AT3G08947	0.642779	3.32549	9.41853	0.00214889	0.0206797
AT5G08610	0.642741	4.74091	17.1499	3.46e-05	0.000619521
AT2G18900	0.641966	3.35959	9.54011	0.00201112	0.0196122
AT1G48920	0.641961	7.12983	20.0499	7.56e-06	0.00016238
AT1G79150	0.641379	4.02682	12.771	0.000352284	0.00458857
AT5G13490	0.64135	4.95604	17.8884	2.35e-05	0.000439609
AT5G14840	0.641278	4.10351	13.17	0.000284682	0.00382822
AT5G02050	0.641242	3.93217	12.2765	0.000459003	0.00572987
AT4G01050	0.639785	5.28849	18.7964	1.46e-05	0.000289969
AT1G32060	0.639659	6.56643	19.5355	9.89e-06	0.000206559
AT2G24650	0.637875	2.95348	7.7715	0.00530919	0.0425305
AT5G62190	0.637361	6.75133	19.5185	9.98e-06	0.000207889
AT5G48090	0.637258	3.17139	8.64033	0.00328914	0.0291409
AT1G13380	0.637257	3.30867	9.17943	0.00244844	0.0229536
AT1G74470	0.636021	7.19365	19.7172	8.99e-06	0.000189593
AT5G22640	0.635369	5.89035	19.1581	1.21e-05	0.000245884
AT1G07220	0.635351	3.35947	9.35356	0.0022264	0.0212129
AT5G23460	0.635271	3.39987	9.49866	0.00205705	0.0199156
AT3G52170	0.635225	3.34785	9.29066	0.00230415	0.0218115
AT5G49665	0.634478	5.10449	17.9741	2.24e-05	0.000423879
AT2G37690	0.633702	3.01425	7.89428	0.00496057	0.0402991
AT1G33170	0.633556	4.27482	13.8312	0.000200146	0.00282475
AT5G22650	0.633267	6.63911	19.1807	1.19e-05	0.000243282
AT3G03710	0.632743	4.46925	14.9856	0.000108439	0.00168163
AT5G18660	0.632427	3.91432	11.8747	0.000569372	0.0068777
AT3G04260	0.632178	4.66974	16.1798	5.77e-05	0.000974345
AT4G35760	0.632102	3.33278	9.14586	0.00249375	0.0233044
AT1G79560	0.631049	4.59878	15.7	7.43e-05	0.00120623
AT5G64580	0.630909	4.359	14.226	0.000162253	0.00235938
AT1G75280	0.630901	5.16839	17.9727	2.24e-05	0.000423879
AT2G35760	0.630492	4.38058	14.3235	0.000154069	0.00225894
AT2G01900	0.630324	4.67334	16.0865	6.06e-05	0.00101684
AT2G47510	0.630087	7.49463	19.475	1.02e-05	0.000212286
AT1G64510	0.629796	6.10873	18.8852	1.39e-05	0.000278599
AT1G79620	0.629643	3.26923	8.83213	0.00296077	0.0268475
AT4G02990	0.629262	3.78266	11.0861	0.000870224	0.00979038
AT4G29060	0.629257	6.62759	18.9367	1.35e-05	0.000272479
AT2G24090	0.629191	6.13849	18.8633	1.41e-05	0.000281483
AT4G31000	0.629166	4.83999	16.8809	3.98e-05	0.000702539
AT3G55720	0.62905	4.69279	16.1603	5.83e-05	0.00098293
AT3G46780	0.629039	3.90558	11.6832	0.000631042	0.00746695
AT4G16630	0.627748	3.61553	10.2316	0.00138118	0.0143122
AT1G80270	0.62766	3.23445	8.62174	0.00332286	0.0293777
AT2G41850	0.62749	5.90876	18.6882	1.54e-05	0.000304549
AT1G50660	0.626565	5.47729	18.3805	1.81e-05	0.000349657
AT4G26110	0.626151	5.56684	18.4319	1.76e-05	0.000341527
AT4G04350	0.625737	4.0316	12.2008	0.000478002	0.00593178
AT3G56010	0.625629	3.2343	8.55474	0.00344739	0.0302954
AT1G54510	0.625609	3.57357	9.95239	0.00160712	0.0162868
AT1G01170	0.62505	4.24482	13.2583	0.000271583	0.00367857
AT5G24490	0.624621	5.81666	18.4939	1.71e-05	0.000331949
AT3G17170	0.623948	4.23615	13.1931	0.000281184	0.00379029
AT4G26080	0.623331	7.28302	18.9862	1.32e-05	0.00026646
AT2G29060	0.623281	3.57773	9.90289	0.00165091	0.0166604
AT3G54050	0.623014	4.16112	12.7217	0.000361696	0.00469116
AT1G20340	0.622995	6.55112	18.5372	1.67e-05	0.000325677
AT1G33410	0.622446	4.431	14.2828	0.000157428	0.00230015
AT1G19380	0.622301	4.20548	12.9234	0.000324734	0.00428621
AT5G46160	0.62224	3.72252	10.5351	0.00117187	0.0124789
AT1G11880	0.621931	3.16841	8.21967	0.00414517	0.035082
AT2G04240	0.621912	5.07033	17.1704	3.42e-05	0.000613865
AT2G39930	0.621692	4.4795	14.5239	0.000138516	0.00206606
AT1G20020	0.621585	4.57441	15.0784	0.000103233	0.00161193
AT4G02790	0.621303	3.47917	9.43523	0.00212941	0.020504
AT5G23200	0.621217	3.22513	8.4128	0.0037271	0.0322641
AT4G34540	0.620812	3.25075	8.50832	0.00353643	0.0309242
AT2G34780	0.620678	3.60224	9.94432	0.00161417	0.0163485
AT5G01410	0.620515	5.50158	18.0484	2.16e-05	0.000409901
AT4G30280	0.620365	9.23758	18.844	1.42e-05	0.000284004
AT5G13520	0.620346	3.92216	11.4602	0.000711433	0.00827542
AT5G02820	0.62016	3.19042	8.24546	0.00408668	0.0347488
AT1G19740	0.619696	3.45642	9.29354	0.00230052	0.0217833
AT3G23170	0.61942	3.91348	11.3494	0.000755133	0.0087054
AT3G19810	0.619234	3.46034	9.28873	0.00230657	0.0218221
AT5G54600	0.618973	6.4928	18.3051	1.88e-05	0.000361893
AT2G35240	0.618821	3.87596	11.1756	0.000829241	0.00939219
AT2G24060	0.617821	4.65962	15.3986	8.71e-05	0.00139308
AT1G77060	0.617669	3.18938	8.18749	0.00421933	0.0355979
AT5G60990	0.617342	3.83178	10.9316	0.00094587	0.0104731
AT1G60550	0.616827	4.89967	16.413	5.1e-05	0.000875166
AT1G47710	0.616635	5.42245	17.7874	2.47e-05	0.000461257
AT2G31270	0.616471	3.25891	8.41853	0.00371536	0.0322039
AT1G22700	0.616193	5.04021	16.7693	4.23e-05	0.000740811
AT5G15630	0.615431	3.04202	7.56472	0.00595377	0.0462711
AT3G63190	0.614829	5.83938	17.927	2.3e-05	0.000432947
AT3G51820	0.614723	4.98688	16.5619	4.71e-05	0.00081574
AT3G52140	0.614578	5.82734	17.907	2.32e-05	0.000436068
AT5G13170	0.614567	4.16175	12.3831	0.000433522	0.00545229
AT1G13590	0.614297	4.04529	11.8107	0.000589256	0.00708116
AT2G20585	0.614269	3.14918	7.92313	0.0048821	0.0398404
AT4G25340	0.614162	4.33308	13.3472	0.000259005	0.00353384
AT5G47230	0.614078	3.32727	8.60947	0.00334533	0.029553
AT2G45030	0.613958	4.55438	14.6216	0.000131519	0.00198193
AT3G15380	0.613499	4.49631	14.248	0.000160365	0.00233394
AT3G04820	0.613428	3.09466	7.70052	0.00552201	0.0436321
AT5G26742	0.613393	7.1729	18.343	1.85e-05	0.000355788
AT5G27220	0.613352	3.24303	8.27106	0.00402946	0.0344204
AT3G15850	0.613189	3.85666	10.882	0.000971515	0.0106867
AT5G59090	0.612852	6.82205	18.1088	2.09e-05	0.00039777
AT3G05380	0.612616	4.03625	11.7308	0.000615125	0.00731986
AT3G26060	0.61232	5.90192	17.8073	2.45e-05	0.000456954
AT5G15230	0.61204	10.8082	17.789	2.47e-05	0.000461124
AT2G18710	0.611531	5.29846	17.2124	3.35e-05	0.000602194
AT4G02450	0.611065	6.64108	17.8753	2.36e-05	0.000442159
AT3G20570	0.610936	3.85065	10.7912	0.00102035	0.0111364
AT3G44600	0.610061	4.88604	16.0409	6.21e-05	0.00103853
AT3G13120	0.609579	6.43616	17.7552	2.52e-05	0.000468087
AT1G22430	0.609323	3.95706	11.2257	0.000807178	0.00918254
AT4G19985	0.6089	3.17939	7.90507	0.00493107	0.0401328
AT2G37990	0.608831	4.94205	16.1177	5.96e-05	0.00100174
AT2G20060	0.60844	4.15366	12.1063	0.000502827	0.00618276
AT2G31060	0.608093	4.23486	12.5276	0.000401264	0.0051389
AT2G31970	0.607824	3.72551	10.1168	0.00146987	0.0150548
AT5G53980	0.607745	7.70735	18.1847	2.01e-05	0.000382879
AT1G08980	0.607407	3.82673	10.5404	0.00116852	0.0124542
AT1G18800	0.607376	4.34187	13.0966	0.000296048	0.00395574
AT5G39830	0.607357	3.97447	11.2359	0.000802764	0.00915401
AT1G77890	0.606821	3.44855	8.88857	0.00287064	0.0261643
AT5G42690	0.606545	4.36848	13.2155	0.000277846	0.0037498
AT1G12800	0.606243	5.31074	16.9637	3.81e-05	0.000676105
AT2G38390	0.606184	3.14322	7.70165	0.00551857	0.0436171
AT1G55900	0.606085	3.56691	9.31936	0.00226834	0.0215691
AT2G21330	0.606081	4.90721	15.886	6.73e-05	0.0011057
AT5G51010	0.605497	3.42313	8.7348	0.00312301	0.0279491
AT4G09040	0.605477	4.89389	15.8111	7.01e-05	0.00114636
AT4G36250	0.604554	7.5781	17.9687	2.25e-05	0.000424519
AT4G00180	0.604547	3.87962	10.6911	0.00107706	0.0116644
AT2G26540	0.604026	3.20443	7.88452	0.00498741	0.0404348
AT4G28750	0.603519	4.496	13.779	0.000205785	0.00289227
AT3G62910	0.602933	3.44692	8.79345	0.0030242	0.0272681
AT5G51270	0.602198	3.74222	9.97753	0.00158532	0.0160756
AT1G10910	0.602057	3.72679	9.90881	0.00164561	0.0166168
AT4G37920	0.601507	3.62977	9.45817	0.00210295	0.0202957
AT1G71500	0.60127	4.58606	14.1933	0.000165094	0.00239446
AT5G13690	0.600872	3.88887	10.6146	0.00112257	0.0120541
AT4G08160	0.600608	3.4908	8.8811	0.00288241	0.0262467
AT1G30590	0.600349	4.5913	14.1873	0.000165626	0.00239909
AT1G14810	0.600162	4.86715	15.4423	8.51e-05	0.00136648
AT2G45950	0.600012	3.3052	8.17099	0.00425787	0.0358341
AT1G33560	0.599842	3.64685	9.47297	0.00208606	0.0201558
AT4G27380	0.599836	3.95166	10.8569	0.000984787	0.0108114
AT4G24750	0.599453	4.85995	15.4019	8.7e-05	0.00139133
AT3G17930	0.599255	3.49224	8.83048	0.00296346	0.0268642
AT1G67840	0.599008	3.34685	8.28356	0.00400182	0.0342366
AT3G25030	0.598715	3.19641	7.73235	0.00542553	0.0432459
AT5G15860	0.598583	5.51377	16.8175	4.12e-05	0.000724123
AT1G48650	0.598413	4.23311	12.1272	0.000497229	0.0061229
AT1G76730	0.598357	3.36037	8.31497	0.00393321	0.0336839
AT3G23830	0.598304	3.74404	9.85179	0.0016974	0.0170266
AT2G26100	0.598121	3.98801	10.9724	0.000925268	0.0102993
AT5G53580	0.598067	4.00501	11.0259	0.000898959	0.0100464
AT2G04360	0.597855	4.14043	11.6268	0.000650454	0.00765086
AT2G02740	0.597311	3.22533	7.78543	0.00526842	0.0422542
AT4G38470	0.597113	7.64523	17.5481	2.8e-05	0.000514509
AT5G40660	0.597038	4.18135	11.7988	0.000593055	0.00711772
AT5G48790	0.596896	3.1281	7.4202	0.00645124	0.0494062
AT4G32260	0.596651	6.06137	16.968	3.81e-05	0.000674945
AT1G34000	0.596614	3.18761	7.63059	0.00574023	0.0449966
AT2G28000	0.596536	7.23438	17.3829	3.06e-05	0.000556043
AT5G42540	0.596421	4.9805	15.5967	7.85e-05	0.00126718
AT5G25900	0.596321	4.79	15.0443	0.000105117	0.0016366
AT4G20360	0.595922	7.57878	17.4635	2.93e-05	0.000535286
AT1G71695	0.595312	6.81744	17.0892	3.57e-05	0.000637247
AT2G33450	0.595166	6.22235	16.9129	3.92e-05	0.000692637
AT1G51800	0.595062	4.88946	15.2512	9.42e-05	0.00149056
AT1G42440	0.594996	4.41636	12.9862	0.000314014	0.00416106
AT2G02170	0.594874	3.51321	8.77527	0.00305448	0.0274748
AT5G14520	0.594622	4.98687	15.4999	8.26e-05	0.00133056
AT4G17600	0.593355	5.51721	16.5366	4.78e-05	0.000825847
AT5G55920	0.59332	4.44002	13.0561	0.000302511	0.00403088
AT2G34357	0.593278	4.00267	10.8621	0.000982048	0.0107849
AT5G23535	0.593189	4.04856	11.0382	0.000893011	0.00999655
AT3G55800	0.593188	6.00957	16.7589	4.25e-05	0.000744104
AT2G34900	0.593059	3.37592	8.22786	0.00412649	0.0349649
AT1G79190	0.592625	3.14619	7.40175	0.00651774	0.0498214
AT3G08940	0.592549	4.5495	13.5684	0.00023021	0.0031981
AT5G06340	0.592444	3.79027	9.87792	0.00167347	0.0168374
AT3G03950	0.592173	4.01003	10.8296	0.000999398	0.0109432
AT1G19600	0.591888	5.01547	15.4312	8.56e-05	0.00137353
AT3G20330	0.591343	4.18218	11.5818	0.000666399	0.00780562
AT2G39190	0.59087	4.61644	13.8816	0.000194855	0.00276291
AT5G13510	0.590763	5.49376	16.3755	5.2e-05	0.000889926
AT2G36990	0.590267	4.15039	11.3897	0.000738932	0.00853327
AT4G12600	0.589949	5.19158	15.7842	7.11e-05	0.00115879
AT1G02910	0.5894	4.13249	11.2959	0.000777209	0.00890102
AT5G53490	0.589199	4.05868	10.9522	0.000935436	0.0103816
AT3G08010	0.589186	4.18585	11.5079	0.000693408	0.00809097
AT3G11964	0.587751	4.34339	12.3045	0.000452151	0.00565694
AT4G31810	0.587641	3.44486	8.33114	0.00389837	0.0334793
AT5G64860	0.587281	3.94108	10.3704	0.00128111	0.0134201
AT3G04650	0.587207	3.81587	9.83236	0.00171542	0.0171721
AT2G22680	0.587116	5.52168	16.1988	5.71e-05	0.000966059
AT2G26510	0.586918	6.24512	16.4632	4.97e-05	0.000854906
AT1G63980	0.586167	5.03184	15.1949	9.71e-05	0.00152983
AT2G25840	0.585858	4.11276	11.0661	0.000879658	0.00987339
AT5G13500	0.585761	5.84009	16.276	5.48e-05	0.000932639
AT5G20720	0.585666	7.6686	16.8907	3.96e-05	0.000699655
AT3G26900	0.584801	4.10718	11.011	0.000906199	0.0101139
AT5G38420	0.584463	8.84732	16.8092	4.14e-05	0.000726917
AT1G02110	0.584125	4.00411	10.5305	0.00117475	0.0124969
AT3G63160	0.58317	4.03329	10.6226	0.0011177	0.0120138
AT4G34250	0.582747	5.64419	16.0305	6.24e-05	0.00104112
AT3G14230	0.582643	8.23017	16.7608	4.24e-05	0.00074374
AT1G25540	0.582536	5.07167	15.1107	0.000101485	0.00159041
AT5G38940	0.582394	4.41531	12.4227	0.000424425	0.00537002
AT4G38970	0.582062	7.05383	16.4746	4.94e-05	0.000850663
AT5G06350	0.581281	3.70864	9.17923	0.0024487	0.0229536
AT4G25630	0.581262	4.88445	14.5623	0.000135725	0.00203173
AT3G27280	0.580593	3.63609	8.86007	0.0029158	0.0264969
AT3G13570	0.580263	4.49833	12.774	0.000351714	0.00458292
AT1G06950	0.580117	6.31873	16.0943	6.03e-05	0.00101319
AT4G11120	0.579972	4.524	12.8912	0.00033036	0.00434597
AT3G22660	0.579906	3.89661	9.91966	0.00163594	0.0165341
AT3G60500	0.579885	3.93278	10.0737	0.00150466	0.0153597
AT1G52230	0.579728	4.51201	12.8156	0.000343982	0.00449545
AT5G51890	0.579379	5.73918	15.9016	6.68e-05	0.00109868
AT3G05060	0.579114	5.13079	15.0836	0.00010295	0.00160838
AT4G38160	0.579064	4.16078	11.0193	0.000902182	0.0100791
AT1G33810	0.57832	4.68145	13.6145	0.000224625	0.00313216
AT2G46820	0.578181	5.45031	15.6621	7.58e-05	0.00122766
AT3G49430	0.57814	4.96626	14.6118	0.000132207	0.00198872
AT2G23950	0.577663	3.6475	8.80625	0.00300306	0.0271486
AT3G27180	0.577525	3.56547	8.46479	0.00362207	0.0314846
AT5G58250	0.577349	6.00331	15.8743	6.78e-05	0.00111188
AT1G69070	0.576758	3.79502	9.40422	0.00216572	0.020794
AT5G26000	0.576628	6.37343	15.906	6.66e-05	0.00109721
AT5G46280	0.575942	3.92179	9.90768	0.00164662	0.016622
AT5G42150	0.575762	3.43754	7.96893	0.00476011	0.0390822
AT5G19370	0.575457	4.71022	13.6356	0.000222116	0.00310233
AT5G15980	0.575326	4.21372	11.1374	0.00084651	0.00955879
AT1G69040	0.574599	5.12176	14.8424	0.000116988	0.00180256
AT5G08050	0.57425	3.5012	8.15571	0.0042939	0.0360471
AT3G62030	0.574082	6.90929	15.9548	6.49e-05	0.00107451
AT1G67090	0.574043	9.93737	16.001	6.34e-05	0.0010539
AT3G01820	0.573928	4.04138	10.3237	0.00131395	0.0137171
AT4G02400	0.573023	4.33919	11.6739	0.000634214	0.00749657
AT1G15710	0.572868	3.37242	7.66422	0.0056342	0.044362
AT5G20600	0.572332	4.01675	10.1682	0.00142949	0.014713
AT4G10180	0.572307	4.49667	12.4164	0.000425868	0.00538424
AT4G16370	0.571808	3.9933	10.0544	0.00152049	0.0154978
AT3G09210	0.571757	3.92381	9.76049	0.00178378	0.0177717
AT4G23570	0.571673	3.67171	8.73152	0.00312864	0.0279846
AT3G49360	0.570824	5.4028	15.2438	9.46e-05	0.00149501
AT1G77030	0.569046	3.76258	9.02497	0.00266415	0.0246432
AT5G61020	0.568993	5.95655	15.4176	8.63e-05	0.00138117
AT5G20040	0.568648	3.71678	8.81176	0.00299401	0.0270904
AT4G24280	0.568618	7.00651	15.7107	7.39e-05	0.00120003
AT3G06510	0.568313	3.86167	9.39984	0.0021709	0.0208259
AT2G01080	0.567811	3.97184	9.83068	0.00171699	0.0171776
AT1G16080	0.567698	3.81384	9.17825	0.00245002	0.0229595
AT3G53900	0.567296	3.40046	7.61514	0.00578958	0.0453095
AT1G52670	0.567074	4.54174	12.4106	0.000427195	0.00539493
AT2G13440	0.56587	3.71606	8.72114	0.0031465	0.0281218
AT1G56050	0.565709	3.53167	8.02567	0.00461328	0.0381563
AT4G25080	0.565576	5.48625	15.0188	0.000106548	0.00165536
AT3G50240	0.565558	4.20572	10.7394	0.00104933	0.0114156
AT5G18550	0.565346	3.90505	9.48269	0.00207503	0.0200666
AT4G09010	0.565138	4.25588	10.9394	0.000941923	0.0104363
AT2G30700	0.56461	4.77093	13.4157	0.000249716	0.00342939
AT5G40160	0.564447	3.36582	7.43671	0.0063923	0.0490599
AT1G01320	0.564391	6.13845	15.2241	9.56e-05	0.00150778
AT2G05120	0.56373	3.5542	8.03318	0.00459418	0.0380546
AT3G11690	0.563628	5.66182	15.0165	0.000106677	0.00165607
AT3G20230	0.563426	4.74529	13.2395	0.00027432	0.00370817
AT5G38110	0.562943	3.37965	7.44049	0.00637891	0.048982
AT1G67700	0.562164	5.22494	14.4069	0.000147389	0.00217619
AT2G27840	0.562008	3.99286	9.72008	0.00182343	0.018113
AT3G52150	0.561563	6.03761	15.038	0.000105466	0.00164006
AT4G15545	0.561237	6.87535	15.2367	9.49e-05	0.00149917
AT1G35680	0.5612	7.05595	15.3215	9.08e-05	0.00144218
AT1G29900	0.560988	5.62643	14.863	0.000115715	0.00178704
AT3G03110	0.560905	4.22574	10.6583	0.00109634	0.0118388
AT5G22500	0.560801	7.51541	15.4649	8.41e-05	0.00135218
AT5G22320	0.560799	3.54498	7.93015	0.0048632	0.0397248
AT5G51100	0.560568	3.90768	9.33181	0.00225298	0.0214419
AT1G67740	0.560502	5.50555	14.7665	0.000121788	0.00186454
AT1G59760	0.560472	4.17905	10.4202	0.00124707	0.0131208
AT5G03940	0.559634	5.49752	14.7191	0.000124892	0.00189909
AT1G78630	0.559571	6.94734	15.187	9.75e-05	0.00153557
AT5G56530	0.559522	3.40594	7.44657	0.0063574	0.0488656
AT1G08520	0.559456	5.80133	14.8663	0.000115516	0.00178479
AT3G61870	0.558527	4.23858	10.6228	0.00111756	0.0120138
AT3G45300	0.558212	5.80293	14.7814	0.000120832	0.00185076
AT3G51270	0.557977	4.78709	13.1858	0.00028228	0.00380049
AT1G55670	0.557528	5.74451	14.7293	0.000124217	0.00189397
AT3G14420	0.557448	5.14834	14.0244	0.000180602	0.00259476
AT3G63540	0.557013	4.35617	11.1121	0.000858108	0.0096735
AT4G09650	0.556857	5.38862	14.4997	0.000140304	0.00208902
AT1G49400	0.556778	3.58766	7.96214	0.00477799	0.0392003
AT1G31860	0.556417	3.45229	7.50455	0.00615594	0.0475127
AT5G47210	0.556268	7.93127	15.2858	9.25e-05	0.00146553
AT4G37930	0.556149	6.22655	14.7988	0.000119725	0.00183715
AT4G23180	0.555865	3.52114	7.71403	0.00548085	0.0434443
AT3G23790	0.555747	4.72913	12.8255	0.000342166	0.00447586
AT3G23700	0.554923	3.89976	9.11793	0.00253211	0.0236235
AT4G27450	0.554657	6.39866	14.723	0.000124633	0.00189718
AT5G10580	0.553544	4.90373	13.2588	0.000271506	0.00367857
AT4G26870	0.553312	5.02945	13.5589	0.000231378	0.00321237
AT2G40190	0.552775	3.71226	8.32198	0.00391807	0.0335913
AT2G05620	0.552131	3.50483	7.55387	0.00598972	0.0464753
AT1G66430	0.551901	5.3135	14.104	0.000173117	0.00249254
AT3G20260	0.551729	3.91808	9.08237	0.00258181	0.0240005
AT1G23280	0.551102	3.98564	9.3189	0.00226891	0.0215691
AT5G52820	0.551003	4.27487	10.4924	0.00119924	0.012722
AT1G58370	0.550643	3.61681	7.91523	0.00490346	0.0399801
AT1G42970	0.550245	6.18487	14.4796	0.000141813	0.00210496
AT2G20260	0.549652	4.32214	10.6593	0.00109574	0.0118362
AT2G43360	0.548309	5.00256	13.2501	0.000272772	0.00369171
AT1G29070	0.548263	6.45958	14.3933	0.00014846	0.00218912
AT2G44040	0.547878	3.80836	8.53737	0.00348044	0.0305366
AT3G10690	0.547407	4.38948	10.9054	0.000959364	0.0105807
AT5G14320	0.547039	6.12961	14.2962	0.000156313	0.00228885
AT2G16440	0.546848	3.90729	8.89081	0.00286712	0.0261394
AT4G15770	0.546458	3.6209	7.78625	0.00526601	0.0422497
AT1G55500	0.546263	4.34547	10.6542	0.00109878	0.0118576
AT1G11430	0.545787	5.32056	13.805	0.00020296	0.00285973
AT5G24670	0.545458	4.32543	10.5281	0.00117628	0.0125091
AT5G03530	0.545186	5.55947	14.0051	0.00018247	0.002616
AT4G27730	0.545055	3.65315	7.88142	0.00499596	0.0404747
AT3G48115	0.54503	5.07956	13.2584	0.000271562	0.00367857
AT3G01680	0.544839	3.74147	8.20791	0.0041721	0.0352717
AT3G10985	0.54462	7.53922	14.5936	0.00013349	0.00200265
AT2G39140	0.544288	3.58733	7.61924	0.00577644	0.0452305
AT3G12920	0.543989	5.64727	13.9912	0.000183819	0.00262973
AT4G35850	0.54397	4.79731	12.5763	0.00039093	0.00502956
AT2G29630	0.54385	3.86628	8.64248	0.00328526	0.0291145
AT2G40540	0.543536	5.57822	13.9368	0.000189219	0.00269208
AT1G32580	0.542478	3.92359	8.80289	0.0030086	0.0271712
AT5G26570	0.542038	5.54684	13.8477	0.0001984	0.00280607
AT1G62750	0.541762	5.28025	13.5277	0.000235247	0.00325999
AT5G57930	0.541708	4.7424	12.2429	0.00046734	0.00581665
AT5G19620	0.541606	3.87804	8.61793	0.00332982	0.0294315
AT2G36000	0.541465	4.24005	9.99579	0.00156968	0.0159556
AT3G11630	0.541251	7.18375	14.3116	0.000155038	0.00227116
AT4G21280	0.541172	6.05038	13.9768	0.000185238	0.00264215
AT5G47740	0.54115	3.69566	7.92428	0.004879	0.0398248
AT5G58575	0.539978	3.94504	8.79954	0.00301413	0.0272138
AT5G66310	0.539351	6.72766	14.0132	0.000181681	0.00260692
AT3G61700	0.538527	4.55203	11.2627	0.000791237	0.00903791
AT3G26070	0.538332	4.49285	10.9909	0.000916093	0.0102039
AT1G07320	0.538277	6.32992	13.8758	0.000195459	0.0027703
AT3G57170	0.538244	3.59713	7.49397	0.00619221	0.0477488
AT3G18680	0.538005	4.66432	11.7423	0.000611308	0.00728734
AT3G51140	0.537685	4.38525	10.4896	0.00120104	0.0127267
AT5G28300	0.537288	6.38908	13.8305	0.000200225	0.00282475
AT1G56200	0.536629	5.63141	13.6104	0.000225112	0.00313766
AT2G37270	0.536577	6.74716	13.8697	0.000196096	0.00277816
AT3G07630	0.536515	4.31327	10.1391	0.00145224	0.0149197
AT1G13270	0.535791	4.4211	10.5816	0.00114278	0.0122225
AT4G32720	0.535633	5.36821	13.3968	0.000252248	0.00345709
AT4G21410	0.534152	5.61583	13.4829	0.000240929	0.00332776
AT2G34860	0.534089	4.16212	9.38647	0.00218679	0.0209424
AT2G31890	0.533828	3.641	7.50987	0.00613779	0.0474053
AT3G43270	0.532806	4.80618	12.0812	0.000509638	0.00625279
AT1G04870	0.532801	3.9636	8.64246	0.00328529	0.0291145
AT4G32520	0.532797	4.97205	12.4567	0.000416763	0.00530304
AT2G36930	0.53269	4.97035	12.4334	0.000422012	0.00534554
AT4G18905	0.532502	4.09115	9.0954	0.00256349	0.0238632
AT2G38140	0.531805	5.83372	13.4438	0.000246009	0.00338539
AT3G07670	0.531578	3.92845	8.47048	0.00361075	0.031451
AT5G57030	0.531387	3.83133	8.12392	0.00436984	0.0365567
AT1G29120	0.531319	5.88021	13.4386	0.000246685	0.00339331
AT1G67490	0.531074	4.21074	9.5004	0.00205511	0.0199025
AT1G06680	0.531027	6.80849	13.621	0.000223843	0.00312263
AT1G13160	0.530815	4.00859	8.73975	0.00311456	0.0279032
AT3G27740	0.5307	5.28625	12.9959	0.000312398	0.0041429
AT4G02770	0.530497	5.6726	13.3231	0.000262359	0.00357381
AT5G24620	0.53002	4.40542	10.2856	0.00134136	0.0139599
AT1G17690	0.529998	3.87381	8.22598	0.00413077	0.0349923
AT5G56220	0.529535	4.50217	10.6892	0.00107819	0.0116691
AT2G35820	0.529382	3.85219	8.1316	0.00435137	0.0364299
AT5G28500	0.529351	4.89959	12.1425	0.000493166	0.00608177
AT2G41600	0.529254	3.95013	8.47968	0.00359254	0.0313415
AT3G59040	0.529103	4.37818	10.1267	0.00146206	0.0149931
AT1G29880	0.528508	5.56784	13.1877	0.000281995	0.00379818
AT1G50250	0.528317	3.8446	8.08176	0.00447263	0.0372221
AT1G75330	0.528235	5.43618	13.0874	0.000297511	0.00397213
AT2G26300	0.527756	5.86444	13.2556	0.000271973	0.00368238
AT3G27160	0.527304	5.90339	13.2443	0.000273608	0.00370004
AT4G01310	0.527298	6.39118	13.3214	0.000262595	0.00357557
AT1G30380	0.526654	4.44301	10.3129	0.00132163	0.0137861
AT1G05000	0.526349	4.98713	12.181	0.000483087	0.00597943
AT5G28080	0.5262	4.94251	12.0974	0.000505244	0.00620794
AT1G51940	0.526087	5.87693	13.1771	0.0002836	0.00381521
AT5G16070	0.525519	5.87097	13.1476	0.000288094	0.00386329
AT2G33210	0.525448	4.18766	9.19882	0.00242264	0.0227601
AT4G33520	0.524702	3.99895	8.51427	0.0035249	0.0308397
AT5G17840	0.524502	4.41661	10.1239	0.00146427	0.0150067
AT2G44640	0.523775	4.09032	8.79745	0.00301758	0.0272157
AT4G33580	0.523597	6.49302	13.1361	0.000289869	0.00388244
AT1G01080	0.523577	4.27735	9.49635	0.00205964	0.019935
AT2G20680	0.523031	5.05337	12.1766	0.000484243	0.00598932
AT2G35370	0.522649	5.76923	12.9695	0.00031684	0.00419354
AT3G12080	0.522636	5.073	12.2043	0.000477103	0.00592281
AT5G62440	0.522523	3.80153	7.75365	0.00536192	0.0428643
AT3G53630	0.522461	4.26096	9.39989	0.00217085	0.0208259
AT3G07050	0.522226	5.06569	12.1619	0.000488071	0.00603444
AT5G17930	0.521612	4.10956	8.80338	0.00300779	0.0271712
AT1G07570	0.521611	5.01622	12.0333	0.000522914	0.00639
AT2G17240	0.521376	3.93421	8.16931	0.00426182	0.0358584
AT5G19740	0.520964	6.33516	13.0085	0.000310299	0.0041167
AT1G03680	0.52089	5.04943	12.0558	0.00051664	0.00632254
AT2G44860	0.520339	4.93981	11.8143	0.000588122	0.00707115
AT2G33430	0.52029	5.13673	12.2087	0.000475976	0.00591101
AT4G32420	0.519795	4.38043	9.80359	0.00174246	0.0174013
AT1G33490	0.519571	4.05692	8.53298	0.00348883	0.0305876
AT2G23420	0.518969	3.81871	7.71384	0.00548144	0.0434443
AT3G03920	0.518784	4.95337	11.7713	0.000601856	0.00720935
AT5G22340	0.518705	4.53418	10.3825	0.00127275	0.0133491
AT5G07020	0.518464	4.08703	8.60598	0.00335175	0.0295942
AT1G79040	0.518291	6.34978	12.866	0.000334848	0.00439039
AT3G14110	0.518154	5.04415	11.925	0.0005542	0.0067089
AT5G45930	0.517551	4.08286	8.55945	0.00343849	0.030233
AT5G10950	0.517447	3.97949	8.22136	0.0041413	0.0350639
AT5G19940	0.516306	4.34567	9.51099	0.00204328	0.0198509
AT5G49020	0.515383	4.07074	8.4651	0.00362145	0.0314846
AT3G61460	0.515171	5.29217	12.2611	0.00046281	0.00577096
AT1G09340	0.515052	4.87444	11.451	0.00071497	0.00830507
AT5G66190	0.515007	5.16816	12.0314	0.000523444	0.00639416
AT1G29930	0.514434	7.22395	12.9503	0.000320091	0.00423158
AT5G22330	0.514344	4.31401	9.3264	0.00225964	0.0214992
AT1G15420	0.513913	3.81766	7.56001	0.00596936	0.0463708
AT2G31200	0.513168	4.52882	10.1327	0.00145725	0.0149667
AT4G29510	0.512888	4.1552	8.65297	0.0032664	0.0289853
AT1G53510	0.512722	5.19272	11.9658	0.000542181	0.00659428
AT5G18970	0.512571	3.87655	7.71073	0.00549086	0.0434677
AT4G19710	0.512139	4.54594	10.1745	0.00142461	0.0146717
AT4G18240	0.511862	4.74402	10.9666	0.000928163	0.0103247
AT1G03030	0.51182	4.17763	8.68548	0.00320864	0.0285709
AT5G52440	0.511344	5.14284	11.8082	0.000590056	0.00708679
AT3G14600	0.511267	6.52513	12.5314	0.000400449	0.00513238
AT3G54210	0.510158	6.59997	12.4688	0.000414079	0.00527288
AT1G50920	0.510031	6.08687	12.4423	0.000420004	0.00533217
AT3G44890	0.509769	6.33027	12.454	0.000417382	0.00530689
AT3G01790	0.508736	3.87925	7.61399	0.0057933	0.0453174
AT1G61520	0.50842	5.84901	12.3061	0.000451778	0.00565438
AT4G00230	0.508084	3.90811	7.67413	0.00560335	0.0441399
AT4G39960	0.507782	3.98547	7.93398	0.00485292	0.0396697
AT3G06550	0.507722	6.13882	12.3327	0.000445393	0.00558695
AT2G29200	0.506986	3.86211	7.50641	0.00614959	0.0474856
AT5G49910	0.506984	6.0477	12.2868	0.00045648	0.00570473
AT3G59220	0.506346	6.36808	12.2888	0.000455972	0.00570257
AT3G11170	0.506062	6.14319	12.2569	0.000463842	0.00577953
AT3G54470	0.505703	5.57745	12.0763	0.000510998	0.00626177
AT2G45240	0.505408	4.59853	10.1184	0.00146862	0.0150467
AT1G72040	0.504991	4.13399	8.33179	0.00389697	0.0334759
AT1G60000	0.504671	4.73706	10.6223	0.0011179	0.0120138
AT1G27910	0.504431	4.29884	8.92289	0.0028172	0.0257471
AT4G24830	0.504224	5.00357	11.2337	0.000803701	0.00915848
AT2G44870	0.504076	4.49621	9.66343	0.00188051	0.018543
AT5G08790	0.503809	4.93462	11.0667	0.000879375	0.00987339
AT5G15260	0.503668	3.97337	7.75307	0.00536362	0.0428643
AT4G39970	0.503643	4.11164	8.19762	0.00419585	0.0354275
AT1G12770	0.502875	4.04595	7.97849	0.00473503	0.0389524
AT1G52220	0.502556	4.33742	8.99437	0.00270912	0.0249362
AT2G44120	0.502471	6.755	12.18	0.000483353	0.00598052
AT2G40820	0.502253	5.69032	11.9597	0.000543961	0.00661354
AT3G06430	0.50199	4.32928	8.94627	0.00278137	0.0254542
AT2G37860	0.501789	3.93216	7.57206	0.00592958	0.0461566
AT3G02220	0.501276	4.28123	8.73531	0.00312214	0.0279487
AT2G30570	0.500617	5.84555	11.9281	0.000553265	0.0067024
AT3G58660	0.500217	3.94908	7.59594	0.00585156	0.0456457
AT4G19240	0.499941	4.84269	10.7337	0.00105253	0.0114467
AT1G64880	0.499638	5.022	11.0743	0.000875801	0.00983995
AT4G28040	0.49939	6.52719	11.954	0.000545634	0.00662808
AT3G13580	0.499245	5.31583	11.5588	0.000674701	0.00788911
AT4G16390	0.499142	4.34701	8.9217	0.00281904	0.0257499
AT1G04510	0.498939	5.22636	11.3967	0.000736178	0.00851024
AT1G17650	0.498785	4.57692	9.77168	0.00177296	0.0176796
AT1G04420	0.498676	4.44086	9.26483	0.00233687	0.0220529
AT3G26650	0.498326	6.87728	12.0353	0.000522356	0.00638551
AT1G02150	0.498135	5.23874	11.3856	0.000740567	0.00854921
AT5G58900	0.498095	5.99277	11.8529	0.000576056	0.00695093
AT4G33680	0.497961	5.55718	11.7025	0.000624542	0.0074057
AT2G34630	0.497522	4.45075	9.24936	0.00235668	0.0222087
AT1G17220	0.497425	5.38749	11.6074	0.000657292	0.0077097
AT1G18980	0.497392	6.16197	11.8362	0.000581251	0.00700105
AT1G77330	0.497262	9.19423	12.1492	0.000491395	0.00606216
AT3G22320	0.497166	5.72657	11.7296	0.000615493	0.00732164
AT3G56070	0.495791	4.91128	10.6799	0.00108359	0.01172
AT1G79245	0.495371	6.55652	11.7746	0.00060081	0.00720051
AT5G35220	0.495155	4.11118	7.93657	0.00484597	0.0396226
AT5G20160	0.495011	4.87997	10.5891	0.00113814	0.0121884
AT2G32560	0.494914	5.14452	11.0795	0.000873323	0.00981693
AT5G38660	0.494847	4.4251	9.0488	0.00262964	0.024371
AT2G35040	0.494437	4.98696	10.7721	0.00103094	0.011241
AT4G33110	0.493795	4.88703	10.5534	0.00116028	0.0123743
AT5G38200	0.493727	6.07351	11.6616	0.000638399	0.00753576
AT2G37600	0.493548	4.31704	8.59633	0.00336954	0.0297357
AT2G47160	0.493042	7.01305	11.8375	0.000580837	0.00699857
AT1G10380	0.492552	3.97119	7.42632	0.00642932	0.0492832
AT3G15190	0.492473	6.30726	11.6322	0.000648589	0.00763427
AT3G27850	0.491721	6.1332	11.5783	0.000667665	0.00781772
AT1G68590	0.491672	5.49821	11.3923	0.000737904	0.00852725
AT3G44750	0.491005	4.20387	8.10563	0.00441413	0.0368447
AT5G17230	0.49087	4.33628	8.58975	0.00338175	0.0298199
AT5G41870	0.490826	4.20517	8.11826	0.00438349	0.0366498
AT2G38360	0.490716	5.36746	11.2462	0.000798286	0.00910914
AT1G11210	0.49025	4.0089	7.47096	0.00627186	0.0482958
AT1G03475	0.490202	6.01287	11.4857	0.000701758	0.00817987
AT5G25890	0.490058	4.93741	10.4887	0.00120166	0.0127267
AT3G61470	0.489697	5.50339	11.2955	0.000777399	0.00890102
AT3G12930	0.488581	4.12764	7.78777	0.0052616	0.0422298
AT4G18120	0.488482	5.26848	11.0101	0.000906652	0.0101156
AT2G04842	0.48785	4.62594	9.54164	0.00200944	0.0196052
AT1G53645	0.487442	4.36778	8.59019	0.00338093	0.0298199
AT1G76460	0.486328	4.8326	10.1457	0.00144702	0.0148707
AT4G38520	0.485793	7.02244	11.4939	0.00069864	0.00814919
AT1G36320	0.485091	4.09032	7.55421	0.00598861	0.0464753
AT2G36350	0.48494	4.04858	7.43642	0.00639335	0.0490599
AT4G01150	0.484384	6.08954	11.2244	0.000807716	0.0091845
AT1G55540	0.484223	4.11014	7.60177	0.00583268	0.0455292
AT1G06190	0.4839	4.57523	9.20455	0.00241507	0.0226955
AT5G01590	0.483586	5.20514	10.6813	0.00108277	0.0117149
AT1G62390	0.483419	5.38739	10.9632	0.00092987	0.0103368
AT5G08280	0.483402	6.79833	11.297	0.000776737	0.00890102
AT5G57990	0.483383	5.67114	11.0792	0.00087346	0.00981693
AT5G30510	0.48329	6.8911	11.3315	0.000762463	0.00877785
AT2G45160	0.483005	5.23425	10.6968	0.00107374	0.0116322
AT4G22350	0.48232	4.72729	9.68235	0.00186124	0.0184179
AT2G34300	0.482007	7.32539	11.4067	0.000732215	0.00847609
AT4G13170	0.482006	4.94191	10.1567	0.00143847	0.0147919
AT5G09510	0.481865	6.46953	11.1375	0.000846442	0.00955879
AT5G37130	0.481542	7.04127	11.3061	0.000772971	0.00886542
AT5G14550	0.481199	4.57642	9.10625	0.00254833	0.0237484
AT2G39570	0.480914	5.2574	10.6381	0.00110839	0.0119405
AT3G02450	0.480705	4.47826	8.73359	0.00312509	0.0279602
AT3G07390	0.480421	5.14418	10.4336	0.00123802	0.013046
AT4G39040	0.48033	4.23827	7.88645	0.00498208	0.0404013
AT4G08390	0.480291	6.7784	11.1474	0.000841957	0.00951698
AT2G26080	0.480242	7.27702	11.3119	0.00077055	0.00884369
AT1G31330	0.479901	5.9685	11.0004	0.000911425	0.0101604
AT1G31970	0.479146	5.64015	10.8761	0.000974635	0.0107175
AT1G27400	0.47888	6.73938	11.0621	0.00088157	0.00988824
AT1G66670	0.478113	5.40312	10.7315	0.00105383	0.0114571
AT4G29410	0.477709	6.09501	10.9245	0.000949513	0.0104996
AT3G05920	0.477323	6.08279	10.9031	0.000960515	0.0105865
AT2G43630	0.47709	4.34054	8.13157	0.00435142	0.0364299
AT1G60870	0.476005	4.25577	7.80003	0.00522601	0.0419943
AT3G58700	0.474666	5.42827	10.5841	0.0011412	0.0122095
AT3G16290	0.474091	4.84844	9.67533	0.00186837	0.0184503
AT3G10970	0.473655	4.16516	7.42769	0.00642445	0.0492738
AT4G26900	0.473489	4.38855	8.18009	0.00423656	0.0357084
AT2G40230	0.472829	4.35702	8.04255	0.00457047	0.0378956
AT5G09660	0.472168	5.0202	9.88581	0.00166631	0.0167905
AT5G43500	0.471449	4.46882	8.38829	0.00377767	0.0326179
AT5G19140	0.471418	7.38869	10.9267	0.000948399	0.0104908
AT3G13882	0.47126	4.32616	7.87862	0.00500371	0.0405278
AT2G34020	0.471253	6.62263	10.6684	0.00109037	0.0117857
AT3G45030	0.471224	6.07354	10.6299	0.0011133	0.011983
AT3G52290	0.470997	4.33756	7.91786	0.00489633	0.0399372
AT1G24160	0.470988	5.6245	10.5121	0.00118652	0.0126021
AT5G23050	0.470608	5.71829	10.5201	0.00118143	0.012552
AT1G47500	0.470466	4.31742	7.83306	0.00513138	0.0413922
AT5G01530	0.4701	6.60339	10.6006	0.00113109	0.0121245
AT3G01290	0.469877	6.72449	10.6453	0.00110407	0.0119071
AT1G06070	0.469841	4.4181	8.14702	0.00431451	0.0361839
AT5G33320	0.469683	6.25644	10.5774	0.00114537	0.0122385
AT5G23250	0.469666	4.55732	8.61369	0.00333758	0.0294924
AT2G40300	0.469583	4.79276	9.38481	0.00218878	0.0209496
AT5G48180	0.469539	7.91367	10.9135	0.000955181	0.0105484
AT3G57490	0.469377	4.3711	7.97159	0.00475311	0.0390438
AT5G66380	0.469131	4.98685	9.71708	0.0018264	0.0181346
AT1G53280	0.469096	5.56262	10.3965	0.00126316	0.0132651
AT2G47420	0.468923	4.67739	8.98996	0.00271566	0.0249685
AT1G03160	0.468277	4.36142	7.90951	0.00491899	0.0400511
AT3G21055	0.467959	5.00015	9.67802	0.00186564	0.0184396
AT1G31850	0.466918	7.05366	10.6346	0.00111047	0.0119568
AT4G26220	0.466867	6.15293	10.4421	0.00123236	0.0129986
AT5G51210	0.466506	5.8095	10.364	0.00128559	0.0134629
AT5G43960	0.465305	5.74468	10.2949	0.00133464	0.0138985
AT1G12230	0.465214	6.70708	10.4304	0.00124019	0.0130607
AT3G56940	0.465078	6.18166	10.371	0.00128074	0.0134201
AT4G21860	0.464943	4.56778	8.46941	0.00361287	0.0314511
AT2G40960	0.464816	4.69382	8.88326	0.00287901	0.0262264
AT1G33120	0.464397	6.02399	10.3126	0.00132184	0.0137861
AT2G40430	0.464226	5.31489	10.0135	0.0015547	0.0158177
AT5G22630	0.46352	5.63425	10.1821	0.00141872	0.0146201
AT1G32470	0.462255	5.5824	10.1054	0.00147905	0.0151258
AT4G26670	0.461132	4.6115	8.47557	0.00360065	0.0313959
AT5G58620	0.460878	4.97678	9.35616	0.00222325	0.0211981
AT5G60540	0.459374	4.49023	8.02696	0.00460998	0.0381563
AT4G23700	0.458241	6.39006	10.0825	0.00149752	0.0152961
AT1G08540	0.457993	4.59834	8.32741	0.00390636	0.0335223
AT2G05830	0.457882	5.05156	9.35117	0.00222931	0.0212287
AT3G29320	0.457696	5.23454	9.63117	0.00191382	0.0188328
AT1G74560	0.457346	5.4539	9.85893	0.00169083	0.0169714
AT4G39980	0.457133	4.85525	9.0149	0.00267886	0.0247725
AT1G15690	0.457083	9.76181	10.1971	0.00140729	0.014529
AT3G62530	0.456944	6.0757	9.99947	0.00156655	0.0159286
AT1G72050	0.456906	4.58753	8.25985	0.00405443	0.034581
AT1G31180	0.456758	4.86872	9.00552	0.00269264	0.024852
AT2G36250	0.456483	4.39046	7.60862	0.00581056	0.0454419
AT3G04340	0.456165	5.40021	9.78182	0.00176321	0.017598
AT4G18975	0.455999	4.40526	7.64656	0.00568962	0.0446649
AT5G20630	0.455366	7.38806	10.1972	0.0014072	0.014529
AT4G10340	0.454793	6.90422	10.0448	0.00152845	0.0155695
AT4G27720	0.454778	6.74793	9.98725	0.00157697	0.0160152
AT1G48350	0.454747	6.02572	9.89263	0.00166014	0.0167334
AT2G43030	0.454719	6.77275	9.99511	0.00157026	0.0159566
AT5G17710	0.454288	5.18706	9.40864	0.00216051	0.0207601
AT5G04600	0.454168	5.03076	9.16402	0.00246914	0.0231193
AT1G80480	0.452652	5.01091	9.08254	0.00258157	0.0240005
AT5G23120	0.452638	4.53671	7.94089	0.00483442	0.0395571
AT1G78370	0.452472	5.61881	9.69819	0.00184527	0.0182814
AT1G05190	0.452105	6.69061	9.84583	0.00170291	0.017057
AT3G08943	0.451722	4.61903	8.16461	0.00427289	0.0359245
AT3G14415	0.451208	6.37392	9.7751	0.00176966	0.0176572
AT5G08500	0.451056	4.72355	8.46878	0.00361412	0.0314511
AT3G07430	0.450636	4.96928	8.92178	0.00281892	0.0257499
AT3G48110	0.450634	4.65053	8.23345	0.00411381	0.0348926
AT3G18280	0.449792	5.03935	9.00379	0.00269519	0.0248612
AT5G65750	0.449485	6.06908	9.67962	0.00186402	0.0184396
AT1G26665	0.449198	5.27296	9.31547	0.00227315	0.0215911
AT3G15630	0.44887	4.8371	8.65904	0.00325554	0.0289271
AT5G13650	0.448773	5.3471	9.40827	0.00216095	0.0207601
AT5G57120	0.448461	4.82878	8.63741	0.00329442	0.0291723
AT5G62050	0.447975	4.8857	8.70216	0.00317943	0.0283869
AT5G14360	0.447523	5.3935	9.40299	0.00216717	0.020802
AT3G07320	0.447317	5.25235	9.21713	0.00239853	0.0225588
AT1G08380	0.447218	5.13774	9.03694	0.00264676	0.0245093
AT1G21600	0.447164	4.93241	8.74698	0.00310222	0.0278297
AT2G46280	0.447009	6.81551	9.67678	0.0018669	0.0184412
AT4G22670	0.446951	6.42823	9.59447	0.00195245	0.0191456
AT3G10350	0.44689	4.46123	7.51489	0.00612074	0.0472844
AT5G46840	0.446111	4.96669	8.75433	0.00308976	0.0277402
AT2G41680	0.445873	4.66875	8.11007	0.00440334	0.036782
AT1G20900	0.445673	6.00847	9.50072	0.00205475	0.0199025
AT2G24020	0.445338	4.90576	8.62738	0.00331259	0.0293024
AT2G39990	0.445327	6.16769	9.5076	0.00204706	0.0198602
AT1G25570	0.445051	5.69062	9.41424	0.00215392	0.0207221
AT3G61830	0.444246	5.42342	9.28958	0.00230551	0.0218183
AT1G74458	0.44419	4.73612	8.25208	0.0040718	0.0346851
AT5G03260	0.443909	5.24557	9.07696	0.00258946	0.0240583
AT5G40770	0.443227	5.58373	9.30229	0.00228956	0.0216918
AT4G09160	0.442828	5.92876	9.37204	0.00220406	0.0210659
AT4G14570	0.442803	4.46716	7.40145	0.00651882	0.0498214
AT5G44250	0.44256	5.27781	9.04934	0.00262887	0.0243705
AT2G40660	0.442336	4.9956	8.65005	0.00327165	0.0290165
AT1G20850	0.442017	6.06229	9.35537	0.00222421	0.0211981
AT5G44650	0.441935	4.82111	8.37369	0.00380815	0.0328219
AT1G54690	0.441878	4.57396	7.68145	0.00558067	0.0439818
AT5G25780	0.441315	4.61429	7.78605	0.0052666	0.0422497
AT1G09640	0.440712	7.47049	9.5714	0.00197714	0.0193313
AT5G64940	0.440265	4.75857	8.17812	0.00424118	0.0357384
AT5G53170	0.439893	5.17846	8.82105	0.00297881	0.0269631
AT2G37660	0.439844	6.18805	9.28251	0.00231442	0.0218718
AT2G06520	0.439046	6.33923	9.25483	0.00234965	0.0221487
AT3G19130	0.438789	6.2684	9.24547	0.0023617	0.0222498
AT3G25920	0.43868	6.80242	9.31625	0.00227219	0.0215881
AT3G18390	0.438357	5.43964	9.05485	0.00262095	0.0243106
AT1G03790	0.438344	5.37332	9.00334	0.00269585	0.0248612
AT1G55840	0.438026	7.44864	9.45099	0.0021112	0.0203461
AT3G51430	0.436358	4.65166	7.71531	0.00547697	0.0434396
AT4G16830	0.43623	5.44899	8.96376	0.00275487	0.025253
AT2G43950	0.436224	4.84902	8.20151	0.00418686	0.0353694
AT4G18480	0.435644	6.19116	9.10812	0.00254573	0.0237307
AT5G12440	0.4355	4.92026	8.2796	0.00401056	0.0342852
AT1G15500	0.434614	7.34679	9.28758	0.00230803	0.0218298
AT5G22440	0.434592	5.83579	9.01111	0.00268442	0.0247966
AT3G58140	0.434505	5.00443	8.36183	0.00383307	0.0329944
AT5G11450	0.434405	4.84923	8.13061	0.00435373	0.0364401
AT4G29260	0.434216	5.76819	8.9759	0.00273664	0.0251407
AT2G18440	0.433994	6.46617	9.04758	0.00263139	0.0243805
AT4G13850	0.433872	5.83271	8.9761	0.00273633	0.0251407
AT3G18130	0.433722	5.92011	8.99287	0.00271134	0.0249492
AT2G20890	0.432948	6.53714	9.00352	0.00269559	0.0248612
AT1G06900	0.431609	5.33936	8.69091	0.00319911	0.0285086
AT5G66570	0.430553	6.8746	8.99772	0.00270415	0.0249169
AT1G23060	0.430394	4.72919	7.72077	0.00546042	0.0433492
AT5G04810	0.429833	4.81375	7.91504	0.00490397	0.0399801
AT4G37910	0.429823	5.49941	8.72175	0.00314545	0.0281199
AT1G63940	0.429655	8.03016	9.14653	0.00249285	0.0233024
AT5G02810	0.42949	4.72414	7.69268	0.00554606	0.0437809
AT1G10960	0.429087	5.95536	8.8029	0.00300858	0.0271712
AT2G22900	0.428905	5.04891	8.20789	0.00417215	0.0352717
AT1G51830	0.428633	4.7246	7.66061	0.0056455	0.0444094
AT1G75350	0.428209	5.79861	8.73543	0.00312194	0.0279487
AT5G56680	0.427401	5.61596	8.66152	0.00325111	0.0288954
AT5G48560	0.427285	5.78569	8.70105	0.00318137	0.0283882
AT5G62790	0.426492	5.32927	8.48328	0.00358544	0.0312876
AT5G50310	0.425967	4.99331	8.02656	0.00461101	0.0381563
AT1G63680	0.425764	4.77629	7.70233	0.00551648	0.0436171
AT3G46740	0.425697	5.50729	8.56067	0.00343618	0.030228
AT3G63410	0.425398	6.3388	8.69123	0.00319855	0.0285086
AT5G23040	0.425162	6.04653	8.65714	0.00325893	0.0289496
AT3G27830	0.423943	6.56112	8.63371	0.00330111	0.0292162
AT4G07390	0.423915	5.21527	8.2286	0.00412481	0.0349595
AT4G14030	0.422837	8.40927	8.85414	0.00292528	0.0265543
AT3G32930	0.422561	4.78901	7.60558	0.00582036	0.0454747
AT4G38900	0.422535	5.0331	7.94552	0.00482206	0.0394847
AT5G48760	0.422122	5.18999	8.13454	0.00434431	0.0363885
AT4G39660	0.422055	5.6085	8.44216	0.0036674	0.0318375
AT3G50340	0.421436	5.00115	7.85688	0.00506421	0.0409487
AT1G20100	0.420148	5.36865	8.28049	0.00400858	0.0342769
AT1G08110	0.41956	5.93725	8.41611	0.00372032	0.0322261
AT3G19370	0.419486	5.36433	8.24291	0.00409242	0.0347726
AT3G60300	0.418969	6.3432	8.43474	0.0036824	0.0319512
AT3G61860	0.418513	4.92929	7.66136	0.00564315	0.0444094
AT4G27640	0.417649	5.2133	7.99732	0.00468604	0.0385967
AT2G33800	0.417631	6.77928	8.44151	0.00366872	0.0318407
AT2G39210	0.416558	5.62103	8.22978	0.00412213	0.0349543
AT3G49670	0.416321	5.00993	7.68974	0.00555509	0.0438213
AT5G60670	0.415776	5.48881	8.16111	0.00428113	0.0359642
AT1G60950	0.414706	6.58112	8.26144	0.00405087	0.0345741
AT3G25500	0.414455	5.83371	8.19898	0.00419268	0.0354097
AT5G02450	0.413993	6.92765	8.33641	0.00388707	0.0334165
AT3G56680	0.413888	5.77371	8.16532	0.00427119	0.0359225
AT4G22490	0.412835	5.88746	8.13756	0.00433709	0.0363461
AT1G59750	0.41276	5.64487	8.0957	0.00443837	0.0370195
AT1G64790	0.411285	6.03827	8.10749	0.0044096	0.0368161
AT5G55190	0.410919	6.78093	8.17258	0.00425414	0.0358118
AT3G25660	0.410025	5.4899	7.94203	0.00483138	0.0395418
AT2G32150	0.409556	7.69471	8.29873	0.00396853	0.033969
AT2G19800	0.409491	5.55399	7.93987	0.00483713	0.0395696
AT2G14910	0.409484	5.9783	8.0241	0.00461727	0.038176
AT1G09620	0.408842	5.98924	8.00807	0.00465832	0.0384343
AT2G30200	0.408574	5.53038	7.89884	0.00494807	0.0402225
AT4G14210	0.407173	5.19002	7.57061	0.00593437	0.0461692
AT5G02380	0.406506	5.96716	7.90268	0.00493759	0.040166
AT1G49600	0.40625	7.17942	8.08864	0.00445571	0.037118
AT5G47190	0.406219	6.08176	7.91374	0.00490748	0.039999
AT1G64550	0.40463	5.80527	7.81225	0.00519079	0.0417812
AT5G14250	0.404353	5.23522	7.51906	0.00610658	0.0472076
AT5G65220	0.403962	6.26733	7.83933	0.00511362	0.0412886
AT4G17560	0.40357	5.50898	7.69631	0.00553491	0.0437237
AT3G51800	0.403407	6.52175	7.82431	0.00515627	0.0415731
AT2G47940	0.401092	5.88474	7.69306	0.00554489	0.0437809
AT4G30950	0.400896	6.20183	7.71745	0.00547047	0.0434102
AT1G78570	0.400209	7.8884	7.93849	0.00484082	0.0395901
AT3G19100	0.399036	7.55576	7.86354	0.00504559	0.0408178
AT1G49760	0.398397	6.11697	7.6166	0.00578491	0.0452835
AT3G52960	0.398154	6.09031	7.60296	0.00582884	0.0455189
AT1G76400	0.397997	5.63914	7.52157	0.00609808	0.0471623
AT4G00740	0.397683	6.5282	7.60263	0.00582989	0.0455189
AT1G19920	0.397634	5.78402	7.54101	0.00603263	0.0467759
AT3G09630	0.397438	7.72853	7.81903	0.00517137	0.0416648
AT3G12780	0.396423	6.96531	7.65785	0.00565413	0.0444565
AT3G52850	0.395906	7.04932	7.65799	0.00565369	0.0444565
AT4G08950	0.391931	7.89118	7.61408	0.005793	0.0453174
AT5G03280	0.391024	7.67961	7.5661	0.00594922	0.0462572
AT2G28840	0.390863	8.16235	7.57608	0.00591639	0.0460872

## Sheet: ET-repressed
Supplementary File 1: Differentially expressed genes in Ler, ein6-1, een-1 and ein6-1 een-1 seedlings in response to ET
edgeR Ler air vs Ler 4h ET
ET-repressed genes
GeneID	logFC	logCPM	F	PValue	FDR
AT1G02205	-0.387774	7.79286	7.45704	0.00632052	0.0486301
AT3G42050	-0.388868	8.3267	7.50078	0.00616885	0.0475796
AT4G34640	-0.389334	6.95329	7.39623	0.00653775	0.0499434
AT1G50010	-0.389618	9.9442	7.39905	0.00652753	0.0498767
AT1G07890	-0.389815	9.76585	7.4265	0.00642868	0.0492832
AT5G12370	-0.39125	6.78701	7.42748	0.00642517	0.0492738
AT4G16190	-0.391855	6.80686	7.4548	0.00632839	0.0486701
AT1G58360	-0.391937	6.656	7.41456	0.00647148	0.0495272
AT3G53480	-0.392506	6.98732	7.52605	0.00608291	0.0471005
AT3G63210	-0.393042	5.88225	7.40999	0.00648793	0.0496418
AT2G26890	-0.393633	6.66149	7.48436	0.00622535	0.0479823
AT1G07080	-0.393999	6.88481	7.55584	0.00598317	0.0464459
AT1G04820	-0.394097	10.2816	7.52484	0.00608699	0.0471213
AT5G16730	-0.394593	7.22697	7.65259	0.00567064	0.0445655
AT3G23750	-0.395044	6.36671	7.52304	0.00609308	0.0471466
AT5G55910	-0.39535	6.16887	7.52653	0.0060813	0.0470989
AT5G03290	-0.395871	6.99945	7.65718	0.00565622	0.0444625
AT1G54010	-0.396205	8.70165	7.76877	0.00531721	0.0425846
AT4G14960	-0.396736	10.374	7.60522	0.00582152	0.0454747
AT1G06400	-0.39703	6.09723	7.58503	0.00588709	0.0458803
AT1G75800	-0.397897	6.51122	7.62698	0.00575171	0.0450761
AT3G14050	-0.398479	5.29508	7.40845	0.00649351	0.0496619
AT1G68410	-0.398906	5.55959	7.57037	0.00593516	0.0461692
AT2G28550	-0.399056	5.6005	7.58207	0.00589674	0.0459448
AT3G43810	-0.399754	7.65805	7.9113	0.00491412	0.0400337
AT5G42100	-0.399981	5.83129	7.661	0.00564428	0.0444094
AT5G03240	-0.400022	9.84485	7.80975	0.00519799	0.0418191
AT3G23920	-0.400059	6.10291	7.70294	0.00551462	0.0436147
AT5G48460	-0.400808	6.01717	7.72284	0.00545418	0.0433492
AT5G48380	-0.400821	5.88856	7.706	0.00550529	0.0435573
AT2G20190	-0.400877	6.37756	7.74895	0.00537587	0.0429418
AT1G76140	-0.402018	5.65977	7.71128	0.00548921	0.0434672
AT2G32690	-0.402243	7.92286	8.02606	0.00461228	0.0381563
AT1G70410	-0.402348	8.5208	8.02074	0.00462585	0.0382227
AT5G28540	-0.402507	7.51424	8.00686	0.00466143	0.0384505
AT5G07250	-0.402694	5.36896	7.64145	0.00570576	0.0447786
AT5G26667	-0.402731	6.99451	7.92181	0.00488566	0.0398598
AT2G46170	-0.402836	5.57953	7.72103	0.00545965	0.0433492
AT4G05150	-0.402854	6.90049	7.90204	0.00493935	0.040166
AT3G07360	-0.403047	5.27238	7.55233	0.00599485	0.0465044
AT1G19110	-0.403253	5.62263	7.74814	0.00537829	0.0429509
AT1G49240	-0.403311	9.77355	7.94688	0.00481843	0.0394647
AT3G21190	-0.403343	5.48762	7.72101	0.0054597	0.0433492
AT4G23730	-0.403422	5.15873	7.44129	0.00637607	0.0489755
AT2G44670	-0.403895	5.64844	7.77787	0.0052905	0.0424111
AT3G50690	-0.404252	5.13111	7.44351	0.0063682	0.0489291
AT3G27820	-0.404567	6.42116	7.88907	0.00497489	0.0403722
AT1G76180	-0.405005	10.2706	7.94813	0.00481511	0.0394567
AT5G36880	-0.405454	7.29174	8.09115	0.00444953	0.0370941
AT4G13350	-0.406398	6.21736	7.9546	0.00479793	0.0393543
AT3G17410	-0.407073	6.13046	7.97687	0.00473927	0.0389683
AT1G30200	-0.407212	5.17027	7.59766	0.00584599	0.0456129
AT5G01820	-0.407314	5.40776	7.84692	0.00509218	0.041165
AT5G18500	-0.408066	5.60583	7.93251	0.00485685	0.0396922
AT1G55360	-0.408165	7.08627	8.15646	0.00429211	0.0360411
AT3G19820	-0.408197	8.74341	8.24178	0.00409498	0.0347856
AT1G44770	-0.408272	5.90268	7.99277	0.00469785	0.038675
AT5G42020	-0.408425	7.53501	8.24462	0.00408858	0.0347488
AT3G58730	-0.409195	7.84429	8.30311	0.00395897	0.0338959
AT1G44800	-0.409239	6.33464	8.07053	0.00450045	0.0374165
AT1G70160	-0.410265	6.3991	8.1114	0.00440012	0.0367643
AT5G56170	-0.410433	7.08265	8.24611	0.00408521	0.0347488
AT3G57530	-0.410752	5.34273	7.92507	0.00487686	0.039817
AT5G66390	-0.411415	7.24574	8.31773	0.00392723	0.0336498
AT5G45410	-0.411437	6.06516	8.14164	0.00432733	0.0362734
AT2G43940	-0.411937	4.97044	7.5212	0.00609931	0.0471623
AT3G04090	-0.41203	6.55805	8.17461	0.00424939	0.0357899
AT2G37940	-0.41235	7.08934	8.32458	0.00391247	0.0335576
AT2G01540	-0.413017	5.06096	7.67994	0.00558533	0.0440082
AT5G65530	-0.413711	5.39521	8.08867	0.00445563	0.037118
AT4G15160	-0.413795	6.93029	8.34489	0.00386896	0.0332778
AT1G71090	-0.414906	5.24967	7.97238	0.00475104	0.0390419
AT1G63000	-0.415065	8.43888	8.53769	0.00347982	0.0305366
AT5G52510	-0.415743	5.42766	8.18134	0.00423366	0.035693
AT4G23710	-0.415784	7.07379	8.46014	0.00363134	0.031557
AT4G34660	-0.416716	4.77361	7.4256	0.0064319	0.0492917
AT2G39130	-0.416767	6.41385	8.36807	0.00381993	0.0328982
AT3G46450	-0.41734	4.75657	7.395	0.00654221	0.0499548
AT5G20700	-0.417952	8.46822	8.6548	0.00326312	0.0289715
AT3G26780	-0.418892	6.67724	8.47421	0.00360335	0.0314032
AT4G01210	-0.418916	5.75998	8.39492	0.00376392	0.0325241
AT5G06640	-0.419443	7.59453	8.70162	0.00318038	0.0283869
AT3G01690	-0.419904	6.96991	8.60104	0.00336085	0.0296668
AT1G80240	-0.420578	6.4118	8.52284	0.00350832	0.0307291
AT4G18950	-0.420858	4.87501	7.72947	0.00543418	0.0432738
AT3G45710	-0.420974	5.78859	8.47865	0.00359457	0.031351
AT5G13810	-0.420996	5.66628	8.45088	0.00364986	0.0317016
AT2G01520	-0.421581	5.39733	8.4033	0.00374663	0.0323997
AT1G57765	-0.421895	5.1052	8.06263	0.00452011	0.0375428
AT4G25220	-0.422545	5.33613	8.38079	0.00379329	0.0327023
AT1G21080	-0.422718	5.955	8.57872	0.00340229	0.0299539
AT3G51550	-0.423079	8.13236	8.87766	0.00288785	0.0262713
AT2G27385	-0.423545	5.063	8.07509	0.00448914	0.0373503
AT2G38380	-0.423551	7.16254	8.7984	0.00301601	0.0272157
AT5G43760	-0.423713	7.78621	8.89672	0.00285785	0.0260619
AT3G13110	-0.423728	5.25258	8.32182	0.00391841	0.0335913
AT3G05200	-0.423908	5.32495	8.40999	0.00373286	0.0323057
AT2G23980	-0.424066	5.51035	8.5341	0.00348669	0.0305768
AT3G48140	-0.4243	8.60252	8.91086	0.00283582	0.0258891
AT2G14740	-0.424449	5.06855	8.12144	0.0043758	0.0365975
AT5G36160	-0.424606	5.36497	8.48627	0.00357954	0.0312605
AT1G31420	-0.42475	6.54651	8.68614	0.00320748	0.02857
AT2G31570	-0.4252	7.90273	8.96396	0.00275458	0.025253
AT4G13530	-0.425444	5.17321	8.2852	0.00399821	0.0342144
AT3G51730	-0.425464	7.21776	8.88773	0.00287197	0.0261693
AT2G40620	-0.425798	5.31949	8.48481	0.00358241	0.0312774
AT2G20740	-0.426384	5.11542	8.24991	0.00407667	0.034709
AT5G58950	-0.426681	6.61443	8.76838	0.00306605	0.0275567
AT1G03060	-0.426937	5.89608	8.74404	0.00310724	0.0278536
AT4G24100	-0.42706	5.26906	8.47424	0.00360329	0.0314032
AT3G04730	-0.428063	7.89473	9.08451	0.00257879	0.0239857
AT4G28600	-0.428278	5.1595	8.3853	0.0037839	0.0326465
AT1G60960	-0.428813	6.18185	8.85013	0.00293172	0.0265936
AT4G17870	-0.428925	6.15051	8.84997	0.00293198	0.0265936
AT5G07290	-0.429102	4.9649	8.16079	0.00428189	0.0359642
AT4G02620	-0.429793	7.35885	9.09623	0.00256233	0.023859
AT5G56340	-0.430546	4.69058	7.68839	0.00555926	0.0438426
AT1G69450	-0.431134	5.32102	8.70164	0.00318034	0.0283869
AT4G35920	-0.43167	4.74105	7.86716	0.0050355	0.0407558
AT1G78610	-0.43225	4.87674	8.14937	0.00430893	0.0361462
AT4G22230	-0.432487	5.15048	8.53132	0.00349203	0.0306077
AT1G14930	-0.432597	5.78384	8.94503	0.00278327	0.0254647
AT5G51060	-0.433163	5.31141	8.77946	0.00304748	0.0274265
AT4G38250	-0.433334	6.82404	9.11656	0.002534	0.023628
AT3G07010	-0.433352	7.26905	9.23047	0.00238112	0.022417
AT2G17380	-0.434508	5.65436	8.99433	0.00270918	0.0249362
AT4G15230	-0.435129	6.47922	9.12024	0.00252892	0.0236002
AT1G20260	-0.435212	8.59696	9.37475	0.00220082	0.0210408
AT5G65020	-0.435314	8.54989	9.38184	0.00219233	0.0209775
AT2G45330	-0.436154	5.00286	8.47113	0.00360945	0.0314481
AT1G19540	-0.436345	4.72257	7.97728	0.00473819	0.0389683
AT4G08685	-0.436643	6.07979	9.16099	0.00247323	0.0231383
AT2G20760	-0.43673	7.87347	9.45481	0.0021068	0.0203154
AT4G19040	-0.436873	5.1712	8.74396	0.00310737	0.0278536
AT5G23430	-0.437238	5.48387	9.07083	0.00259816	0.0241191
AT3G21630	-0.43787	5.31559	8.96235	0.002757	0.0252656
AT4G25140	-0.438063	5.14727	8.75254	0.00309278	0.0277599
AT4G23500	-0.438225	5.14517	8.75495	0.00308871	0.0277381
AT2G21620	-0.438472	7.57865	9.50287	0.00205234	0.0198987
AT5G62680	-0.438704	6.41529	9.26797	0.00233286	0.0220291
AT2G37870	-0.438775	5.18544	8.82649	0.00296993	0.0268994
AT2G41830	-0.439282	4.65351	7.89438	0.00496029	0.0402991
AT3G03170	-0.439322	4.51665	7.47488	0.00625821	0.0482024
AT3G55430	-0.439729	5.36051	9.08788	0.00257405	0.0239482
AT2G20180	-0.440739	4.55621	7.65136	0.00567451	0.0445855
AT4G36750	-0.440757	5.93242	9.31637	0.00227205	0.0215881
AT3G62010	-0.440915	5.61662	9.2581	0.00234547	0.0221155
AT5G14640	-0.440941	4.95311	8.5889	0.00338332	0.0298259
AT5G64740	-0.440946	8.62874	9.62082	0.00192464	0.0189226
AT2G21060	-0.441032	5.87553	9.32179	0.00226532	0.0215472
AT1G06350	-0.4415	6.38355	9.38777	0.00218524	0.0209336
AT1G30900	-0.441556	4.73978	8.22921	0.00412343	0.0349565
AT1G80180	-0.441778	4.88922	8.52231	0.00350935	0.0307291
AT1G12840	-0.441872	7.85293	9.67713	0.00186654	0.0184412
AT4G01680	-0.442474	5.83476	9.37	0.00220652	0.0210833
AT1G17550	-0.443269	5.60404	9.35269	0.00222746	0.0212171
AT1G78380	-0.443607	7.87747	9.75312	0.00179094	0.0178219
AT1G77280	-0.443847	4.5598	7.76268	0.00533516	0.042708
AT3G51770	-0.444106	5.5892	9.3854	0.00218806	0.0209487
AT3G27770	-0.4444	6.64063	9.51646	0.0020372	0.0198033
AT3G08680	-0.444469	5.08475	8.92738	0.00281029	0.0256909
AT2G42300	-0.444622	4.67731	8.15067	0.00430583	0.0361292
AT5G54810	-0.445358	6.53953	9.54612	0.00200455	0.0195708
AT3G15940	-0.445837	5.54215	9.44342	0.00211993	0.0204186
AT5G65660	-0.446076	6.37556	9.57722	0.00197087	0.0192757
AT1G63690	-0.446427	6.23228	9.59287	0.00195414	0.0191566
AT2G22670	-0.446795	7.46255	9.84599	0.00170276	0.017057
AT2G25220	-0.447504	4.50814	7.74067	0.00540059	0.0430983
AT5G48930	-0.447791	7.41757	9.88255	0.00166926	0.016815
AT1G11670	-0.448073	6.44738	9.66884	0.00187498	0.0184939
AT4G34920	-0.448491	4.72242	8.42397	0.00370427	0.0321161
AT3G46620	-0.448705	4.71045	8.39914	0.00375519	0.0324612
AT1G62800	-0.449018	6.34765	9.70562	0.00183783	0.0182231
AT4G14760	-0.45008	4.86423	8.82085	0.00297914	0.0269631
AT3G23690	-0.450097	6.39972	9.75416	0.00178993	0.0178171
AT4G36760	-0.450213	6.2434	9.75689	0.00178728	0.0178012
AT5G20840	-0.450281	5.26125	9.41003	0.00215888	0.020752
AT2G01600	-0.450418	6.46613	9.76602	0.00177842	0.0177236
AT4G25900	-0.450431	5.84037	9.71284	0.00183062	0.0181629
AT3G30180	-0.450834	5.57962	9.66178	0.0018822	0.0185542
AT3G10660	-0.451423	5.55102	9.6856	0.00185795	0.0183961
AT2G43060	-0.452288	5.21221	9.41198	0.00215658	0.0207359
AT2G28320	-0.452846	4.88273	8.95042	0.00277506	0.0254034
AT3G28430	-0.453122	4.65692	8.40842	0.00373607	0.0323168
AT1G78670	-0.453452	5.97517	9.86204	0.00168797	0.0169478
AT4G39990	-0.453599	5.64173	9.79678	0.00174893	0.0174607
AT5G49800	-0.453977	4.73414	8.66949	0.00323693	0.0287922
AT2G28890	-0.454199	6.16554	9.92255	0.00163337	0.0165131
AT4G13580	-0.454235	6.30658	9.92772	0.0016288	0.0164768
AT5G20740	-0.454372	4.34189	7.45691	0.00632098	0.0486301
AT1G15410	-0.454537	4.39246	7.61913	0.0057768	0.0452305
AT4G28770	-0.454656	6.52597	9.94522	0.00161339	0.0163455
AT3G11590	-0.455081	5.1915	9.50841	0.00204615	0.0198602
AT1G08340	-0.455625	4.4239	7.76144	0.00533884	0.0427272
AT1G29330	-0.455681	4.509	8.02204	0.00462253	0.0382047
AT1G50560	-0.455898	5.57461	9.88064	0.001671	0.0168221
AT1G14450	-0.456069	5.6363	9.90142	0.00165223	0.0166687
AT4G11220	-0.456815	6.47385	10.044	0.00152914	0.0155717
AT3G49210	-0.456818	4.60584	8.38214	0.00379048	0.0326865
AT4G11150	-0.456982	9.08381	10.2862	0.00134089	0.0139593
AT2G33070	-0.457447	4.50852	8.09417	0.00444213	0.0370417
AT3G44320	-0.457498	5.50022	9.92943	0.00162728	0.0164664
AT1G30120	-0.458358	6.28086	10.1125	0.00147337	0.0150861
AT4G35790	-0.458656	8.19269	10.4261	0.00124309	0.0130871
AT3G04480	-0.458784	4.48779	8.06549	0.00451299	0.0375022
AT1G55730	-0.459547	4.97429	9.36575	0.00221164	0.0211083
AT2G30980	-0.459624	6.58531	10.1626	0.00143385	0.0147489
AT2G17990	-0.459633	5.90925	10.1284	0.00146067	0.0149926
AT5G15050	-0.459743	4.53318	8.24817	0.00408058	0.0347335
AT4G23030	-0.459971	4.97222	9.37851	0.0021963	0.0210036
AT5G13200	-0.460419	4.41101	7.87494	0.0050139	0.0405907
AT2G25140	-0.460658	4.89412	9.28273	0.00231414	0.0218718
AT2G01910	-0.461214	5.95835	10.2057	0.00140071	0.0144789
AT4G28710	-0.461665	5.4913	10.1078	0.0014771	0.0151197
AT1G61260	-0.461978	4.50991	8.26113	0.00405156	0.0345741
AT4G04955	-0.462	6.15662	10.2609	0.00135944	0.0141218
AT5G59030	-0.463523	5.08072	9.68253	0.00186106	0.0184179
AT5G26260	-0.464004	7.62217	10.6419	0.00110607	0.011921
AT5G55860	-0.464781	5.16738	9.87607	0.00167515	0.0168492
AT5G62880	-0.465143	4.92558	9.50912	0.00204536	0.0198602
AT4G27430	-0.465275	6.33242	10.4223	0.00124561	0.0131095
AT2G17840	-0.465619	6.78423	10.5031	0.00119235	0.0126561
AT5G37740	-0.46572	5.89279	10.3857	0.00127057	0.0133346
AT1G04680	-0.466481	6.91502	10.5899	0.00113766	0.0121871
AT4G18360	-0.466695	5.11564	9.87283	0.0016781	0.0168739
AT5G05600	-0.46675	4.29512	7.70896	0.00549626	0.0435002
AT5G18590	-0.467248	4.82737	9.4286	0.00213712	0.0205723
AT1G27330	-0.468056	5.71613	10.4522	0.00122566	0.012936
AT4G39800	-0.468408	4.23424	7.55849	0.00597439	0.0463992
AT5G26280	-0.468419	9.18821	10.7922	0.00101981	0.0111341
AT3G06650	-0.468623	7.43258	10.8223	0.00100336	0.0109758
AT5G52060	-0.468841	6.54517	10.5741	0.00114738	0.0122561
AT5G50380	-0.468878	5.12248	9.98172	0.00158172	0.016044
AT1G51680	-0.468888	8.18858	10.8948	0.000964826	0.01062
AT3G60390	-0.469838	4.63933	8.96618	0.00275124	0.0252334
AT5G62720	-0.469871	5.88823	10.5693	0.00115036	0.012284
AT4G29950	-0.469895	6.26507	10.6241	0.00111678	0.0120132
AT1G53190	-0.470243	4.89815	9.67127	0.0018725	0.0184803
AT3G52400	-0.470923	4.55319	8.7161	0.0031552	0.0281921
AT3G56760	-0.471108	4.563	8.75982	0.00308047	0.0276715
AT5G24735	-0.471631	4.2208	7.60646	0.00581753	0.0454747
AT2G01480	-0.471894	4.50094	8.58029	0.00339936	0.0299359
AT2G29450	-0.472216	4.87666	9.70514	0.0018383	0.0182231
AT5G01460	-0.472765	6.11114	10.7422	0.00104774	0.0114019
AT3G20250	-0.473418	6.37169	10.7873	0.00102252	0.0111564
AT3G05990	-0.473526	4.71112	9.35549	0.00222406	0.0211981
AT5G63530	-0.473794	5.19139	10.2992	0.00133148	0.0138699
AT3G28940	-0.474156	7.82809	11.1335	0.000848301	0.0095758
AT3G53340	-0.474211	4.69078	9.3034	0.00228818	0.0216873
AT1G60610	-0.474257	4.5261	8.74532	0.00310506	0.0278478
AT5G54510	-0.474267	6.04814	10.8024	0.00101423	0.0110803
AT1G70530	-0.474786	4.6825	9.31339	0.00227574	0.0216096
AT1G18890	-0.474867	6.02474	10.8244	0.00100222	0.0109669
AT4G14880	-0.474908	9.26166	11.0819	0.000872217	0.00980952
AT5G63380	-0.475138	4.23963	7.78867	0.00525897	0.0422187
AT5G63160	-0.475571	4.22569	7.75941	0.00534485	0.0427651
AT5G59880	-0.476236	8.34255	11.231	0.000804881	0.00916004
AT1G70990	-0.476425	4.49077	8.6917	0.00319772	0.0285086
AT5G53330	-0.476951	5.09214	10.2736	0.00135008	0.0140376
AT1G64060	-0.477047	5.0369	10.1932	0.00141024	0.0145414
AT4G24160	-0.477563	5.86379	10.9155	0.00095415	0.0105405
AT1G63500	-0.477829	6.29249	10.984	0.000919514	0.0102387
AT1G26560	-0.477881	4.66676	9.36879	0.00220798	0.0210853
AT2G46030	-0.47792	5.10911	10.3409	0.00130178	0.0136112
AT2G17130	-0.478237	5.98713	10.9705	0.000926201	0.0103063
AT2G19830	-0.478416	6.45031	11.011	0.000906205	0.0101139
AT1G78100	-0.480369	5.34693	10.8259	0.00100143	0.0109619
AT1G20840	-0.48044	6.36681	11.1072	0.000860382	0.00969264
AT3G54830	-0.48057	6.19325	11.103	0.000862339	0.00971143
AT1G30510	-0.480578	7.54527	11.3994	0.000735088	0.00850348
AT4G33360	-0.481299	5.7161	11.052	0.000886381	0.00993557
AT5G59570	-0.481431	5.04629	10.3914	0.00126665	0.0132976
AT3G62630	-0.481654	4.16329	7.75238	0.00536568	0.0428706
AT5G13550	-0.481654	4.6089	9.30625	0.00228462	0.0216816
AT2G29730	-0.481708	4.88602	10.1267	0.00146204	0.0149931
AT1G17120	-0.481806	5.07414	10.4569	0.00122254	0.0129112
AT5G47730	-0.481986	5.37765	10.9413	0.000940945	0.0104289
AT1G47290	-0.482487	5.21238	10.7069	0.0010679	0.0115727
AT4G30810	-0.482727	5.92351	11.1665	0.000833343	0.0094323
AT5G35200	-0.48362	6.52302	11.2501	0.000796615	0.00909316
AT4G11850	-0.483661	5.18477	10.7222	0.00105913	0.0114924
AT1G09270	-0.484913	6.34368	11.314	0.000769674	0.00883968
AT4G20890	-0.485393	8.41337	11.6623	0.00063818	0.00753576
AT4G09000	-0.485858	9.3416	11.5849	0.000665298	0.00779545
AT3G27350	-0.486195	4.96123	10.4458	0.00122986	0.0129763
AT1G05260	-0.486308	7.57326	11.6757	0.000633589	0.00749182
AT4G20140	-0.486393	5.55404	11.2309	0.000804928	0.00916004
AT1G18150	-0.48654	5.86505	11.3346	0.000761185	0.00876615
AT4G11320	-0.486638	6.75761	11.4567	0.000712775	0.0082853
AT3G26520	-0.486732	12.2122	10.8209	0.00100414	0.0109808
AT4G30470	-0.486805	6.40215	11.4025	0.000733856	0.00849216
AT1G67940	-0.487062	4.54796	9.30319	0.00228844	0.0216873
AT2G43050	-0.48764	7.56628	11.7374	0.000612928	0.00730166
AT5G40890	-0.488078	8.92197	11.7468	0.000609831	0.00727355
AT4G17140	-0.488185	6.54798	11.4637	0.000710092	0.00826555
AT4G38360	-0.488212	5.17224	10.8949	0.000964783	0.01062
AT3G62680	-0.488239	7.83656	11.8042	0.000591329	0.00709954
AT1G59710	-0.488752	4.90809	10.4575	0.00122213	0.012911
AT4G27150	-0.489182	4.10738	7.81963	0.00516965	0.0416648
AT2G34660	-0.489357	5.85621	11.4662	0.000709127	0.00825718
AT2G17760	-0.489426	5.28441	11.1384	0.000846059	0.00955879
AT1G51860	-0.489472	4.8602	10.4123	0.0012524	0.0131645
AT3G57650	-0.489501	5.83909	11.4625	0.00071056	0.00826813
AT1G09570	-0.489789	8.9687	11.8238	0.00058513	0.00704273
AT5G09890	-0.490819	6.70171	11.6297	0.000649469	0.00764195
AT1G03930	-0.49098	5.12709	10.9469	0.000938095	0.0104042
AT5G22070	-0.491697	5.09619	10.9293	0.000947062	0.0104827
AT4G28370	-0.49186	4.55051	9.50083	0.00205462	0.0199025
AT3G53230	-0.492498	4.91894	10.6377	0.00110859	0.0119405
AT1G17620	-0.492569	6.74313	11.7274	0.00061623	0.00732782
AT3G03810	-0.492589	4.21171	8.27249	0.00402628	0.0344072
AT2G02800	-0.492868	4.14463	8.05424	0.00454109	0.0376798
AT5G53480	-0.492918	6.79139	11.7703	0.0006022	0.00720945
AT2G41475	-0.49335	6.34099	11.7033	0.000624257	0.00740492
AT5G63590	-0.494001	6.84573	11.8391	0.000580346	0.00699602
AT4G20320	-0.494308	4.24813	8.4682	0.00361527	0.0314511
AT3G55610	-0.494454	6.73614	11.8177	0.00058705	0.00706077
AT3G25580	-0.494604	3.99408	7.64045	0.00570893	0.0447931
AT1G06640	-0.494631	7.22465	11.9982	0.000532859	0.0064903
AT2G05790	-0.494714	6.11167	11.7532	0.000607765	0.00726056
AT2G44940	-0.494793	4.01671	7.71118	0.0054895	0.0434672
AT5G22950	-0.495305	4.96525	10.8487	0.000989177	0.0108454
AT1G07090	-0.495339	5.16822	11.1989	0.000818892	0.00929064
AT2G27370	-0.495347	5.66922	11.6761	0.000633463	0.00749182
AT5G61790	-0.495659	7.71612	12.1507	0.000491001	0.00605952
AT5G03150	-0.496001	5.86759	11.7685	0.000602779	0.00721381
AT2G20950	-0.496363	4.53269	9.60727	0.00193888	0.019046
AT3G57790	-0.496383	5.2026	11.3134	0.000769943	0.00883974
AT3G26935	-0.496404	5.56478	11.6984	0.000625924	0.00741523
AT4G38920	-0.496543	9.0533	12.1386	0.000494196	0.00609225
AT4G30900	-0.496745	3.9039	7.4231	0.00644085	0.049349
AT4G30650	-0.496987	4.37175	9.01281	0.00268192	0.0247863
AT4G02890	-0.497	8.8376	12.1874	0.000481439	0.00596782
AT2G18790	-0.497801	5.96482	11.8754	0.000569148	0.00687746
AT1G21000	-0.49795	5.11428	11.2317	0.000804557	0.00916004
AT4G25830	-0.499052	5.57405	11.8184	0.000586842	0.00706077
AT2G26250	-0.499505	8.79591	12.3153	0.000449547	0.00563484
AT5G46960	-0.49979	4.84817	10.8079	0.00101122	0.0110547
AT4G36920	-0.500036	4.66586	10.2533	0.00136506	0.0141758
AT4G11290	-0.50039	6.87141	12.1586	0.00048894	0.00604074
AT1G52190	-0.500581	6.76499	12.1226	0.000498447	0.00613489
AT2G44790	-0.500905	8.74614	12.3878	0.000432431	0.00544264
AT1G22930	-0.50181	7.40826	12.3972	0.000430254	0.00542336
AT4G16780	-0.502525	5.70445	12.0302	0.00052377	0.00639582
AT4G33220	-0.502785	7.42924	12.4475	0.000418821	0.00532318
AT1G65960	-0.502884	8.64449	12.4965	0.000407986	0.00521307
AT5G49480	-0.50386	4.81122	10.9192	0.00095222	0.0105226
AT1G47600	-0.503897	5.90309	12.1527	0.00049048	0.00605532
AT5G18830	-0.504608	5.23564	11.7492	0.000609071	0.00727099
AT1G78970	-0.505751	4.70021	10.6294	0.00111361	0.011983
AT2G25430	-0.505944	7.00638	12.4842	0.000410676	0.00523611
AT4G05320	-0.506187	9.63904	12.5191	0.000403089	0.00515638
AT1G67360	-0.506243	5.07052	11.5292	0.000685511	0.00800438
AT2G20010	-0.506308	4.91516	11.2322	0.000804362	0.00916004
AT2G39270	-0.506371	4.42186	9.55551	0.00199431	0.0194766
AT1G44170	-0.506719	7.10739	12.5532	0.000395788	0.00508233
AT4G15940	-0.506859	5.1623	11.7257	0.0006168	0.007332
AT4G30190	-0.506897	10.7207	12.2647	0.000461914	0.00576193
AT1G72430	-0.507091	5.84087	12.2882	0.000456138	0.00570257
AT1G67310	-0.507116	5.54855	12.1996	0.000478307	0.00593337
ATMG01390	-0.50798	9.8079	12.5745	0.000391317	0.0050311
AT3G50970	-0.508661	6.28945	12.4394	0.000420644	0.00533543
AT5G26660	-0.508728	4.26506	9.03554	0.00264878	0.0245213
AT3G28550	-0.50897	8.44313	12.8163	0.000343862	0.00449545
AT2G26730	-0.509017	5.63265	12.3182	0.000448853	0.00562824
AT1G79670	-0.509144	4.82471	11.175	0.00082954	0.00939241
AT1G45249	-0.509823	5.50821	12.3114	0.000450499	0.00564047
AT4G35510	-0.509953	3.79022	7.44023	0.00637983	0.048982
AT5G48150	-0.510647	5.68186	12.4175	0.000425606	0.00538295
AT4G33240	-0.510974	5.68049	12.439	0.000420737	0.00533543
AT1G63010	-0.511412	6.39844	12.5743	0.000391349	0.0050311
AT1G14870	-0.511657	5.61646	12.4406	0.000420374	0.00533485
AT1G12040	-0.511677	5.84902	12.5254	0.000401733	0.00514099
AT3G06060	-0.512018	5.45209	12.3897	0.000431987	0.00543909
AT5G63980	-0.512344	5.61376	12.4743	0.000412871	0.00525949
AT1G49510	-0.512345	5.02727	11.7187	0.000619132	0.00735711
AT3G50830	-0.512879	7.0861	12.8499	0.000337733	0.00442649
AT5G44380	-0.51291	9.15051	12.9336	0.000322973	0.00426632
AT5G58160	-0.513175	4.65701	10.7688	0.00103277	0.0112527
AT2G01890	-0.513569	5.37607	12.4133	0.000426558	0.00538984
AT2G38700	-0.513874	6.82489	12.7989	0.000347064	0.00452935
AT5G43780	-0.514074	8.17998	13.0821	0.000298347	0.00398171
AT5G18490	-0.514156	4.15437	8.78744	0.00303418	0.0273361
AT1G64440	-0.514466	5.47266	12.5182	0.000403274	0.00515678
AT4G00820	-0.514525	5.68948	12.6068	0.000384604	0.00495386
AT1G75310	-0.514768	4.95357	11.6975	0.000626229	0.00741523
AT2G39900	-0.514797	5.92523	12.687	0.000368458	0.00476415
AT5G01670	-0.514817	4.33216	9.50748	0.00204718	0.0198602
AT3G24530	-0.51499	5.12193	12.0359	0.000522175	0.00638551
AT1G56145	-0.515028	5.09431	11.9784	0.000538532	0.00655227
AT5G57610	-0.51521	4.81865	11.4375	0.000720192	0.00835995
AT5G19820	-0.515439	6.94788	12.9314	0.000323351	0.00426963
AT1G19870	-0.515791	6.82151	12.8929	0.000330058	0.00434454
AT1G56140	-0.516484	4.76172	11.3279	0.000763924	0.00878866
AT5G54780	-0.516706	4.01658	8.41444	0.00372374	0.0322433
AT1G31710	-0.516721	6.33418	12.8384	0.000339817	0.00445033
AT2G28080	-0.517431	4.03978	8.51842	0.00351687	0.0307852
AT3G53260	-0.517588	6.61167	12.8787	0.000332584	0.00436792
AT5G55730	-0.517722	6.87455	13.0138	0.000309429	0.00410839
AT1G22540	-0.518576	4.03485	8.53697	0.0034812	0.0305366
AT1G08250	-0.51861	3.82679	7.81933	0.00517051	0.0416648
AT5G58010	-0.518674	4.54212	10.5246	0.0011785	0.0125288
AT3G54440	-0.518689	5.30515	12.5404	0.000398513	0.00511074
AT1G59910	-0.519433	4.49181	10.3413	0.0013015	0.0136112
AT1G73760	-0.519705	4.34613	9.74295	0.00180087	0.0179102
AT5G01810	-0.519842	7.42276	13.3	0.000265603	0.00361213
AT4G17900	-0.520402	6.22441	13.009	0.000310224	0.0041167
AT2G39480	-0.520567	5.01311	12.0758	0.000511115	0.00626177
AT4G34580	-0.520868	6.07385	13.0239	0.000307764	0.00409115
AT1G01630	-0.521054	6.28246	13.046	0.000304148	0.00404948
AT1G04040	-0.521467	8.2976	13.4558	0.00024444	0.00336794
AT1G27310	-0.522028	6.67306	13.1261	0.000291418	0.00390008
AT3G14400	-0.523421	5.50387	12.9713	0.000316526	0.00419104
AT2G14900	-0.523555	7.33363	13.4629	0.000243509	0.00335786
AT2G21830	-0.524311	5.16992	12.552	0.000396053	0.00508379
AT5G06200	-0.525509	5.43386	13.0297	0.000306816	0.00408015
AT4G24590	-0.526028	4.07062	8.90221	0.00284929	0.0259909
AT2G33630	-0.526757	5.94045	13.2801	0.000268434	0.00364474
AT5G13710	-0.527051	6.86979	13.4802	0.000241278	0.0033312
AT5G49760	-0.527264	5.9686	13.3204	0.00026273	0.00357596
AT3G60450	-0.527969	6.06528	13.3676	0.000256202	0.00350271
AT1G42470	-0.527987	5.43165	13.1673	0.000285093	0.00383223
AT2G31750	-0.528205	4.30179	9.88014	0.00167144	0.0168221
AT1G77590	-0.528331	5.51203	13.2131	0.000278201	0.00375308
AT4G39400	-0.528414	7.31453	13.7138	0.000213058	0.00298823
AT1G15110	-0.528627	4.91775	12.2459	0.00046659	0.00580947
AT3G48340	-0.528969	5.85834	13.3769	0.00025493	0.00348674
AT1G05170	-0.529638	4.86855	12.1857	0.000481884	0.00596893
AT4G38950	-0.529966	5.13303	12.7627	0.000353846	0.00460535
AT2G43150	-0.529972	10.0491	13.6318	0.000222566	0.00310733
AT2G22560	-0.530047	3.99544	8.76874	0.00306545	0.0275567
AT1G28440	-0.530782	6.5852	13.5339	0.000234469	0.00325324
AT1G30640	-0.530876	5.08684	12.7086	0.000364229	0.00472037
AT3G15880	-0.53093	5.4721	13.3349	0.000260713	0.00355426
AT3G27890	-0.531783	6.10036	13.5585	0.000231428	0.00321237
AT1G19450	-0.532491	6.23186	13.621	0.000223848	0.00312263
AT5G63800	-0.532702	5.70293	13.5131	0.000237093	0.00328016
AT5G02620	-0.533095	4.18597	9.56805	0.00198074	0.0193553
AT2G35060	-0.533438	4.71254	11.8633	0.000572858	0.00691731
AT4G16380	-0.533702	6.32476	13.685	0.000216351	0.0030281
AT4G38060	-0.533938	3.81679	8.24564	0.00408627	0.0347488
AT2G17710	-0.534125	7.26526	13.9895	0.000183991	0.00263107
AT5G13300	-0.534181	5.41813	13.4659	0.000243123	0.00335391
AT5G50900	-0.53441	4.46583	10.8319	0.000998179	0.0109334
AT4G09890	-0.534478	5.36016	13.3949	0.0002525	0.00345773
AT4G17486	-0.534623	4.49382	10.9476	0.000937756	0.0104039
AT3G12630	-0.535323	6.71592	13.8251	0.000200806	0.00283057
AT1G10470	-0.535402	6.22488	13.7682	0.000206979	0.00290783
AT2G43430	-0.535475	4.88717	12.4867	0.000410145	0.00523399
AT4G32040	-0.535711	5.23422	13.2229	0.000276758	0.00373812
AT2G39360	-0.535744	4.74677	12.1222	0.000498568	0.00613489
AT4G25820	-0.535898	7.88439	14.2088	0.000163742	0.00237793
AT3G23570	-0.536273	3.7148	7.94766	0.00481636	0.0394573
AT4G18020	-0.536481	4.38707	10.5666	0.00115209	0.0122986
AT3G18050	-0.538194	5.14225	13.1629	0.000285759	0.00383964
AT4G13340	-0.538309	5.84246	13.8436	0.000198835	0.00280986
AT2G26190	-0.53879	4.74364	12.232	0.000470075	0.00584204
AT5G02580	-0.538862	4.51212	11.2074	0.000815165	0.0092546
AT3G09260	-0.539059	13.0839	12.9081	0.000327401	0.00431802
AT4G36380	-0.539078	5.60936	13.7984	0.000203672	0.00286857
AT2G39430	-0.53915	6.19972	13.9555	0.000187343	0.00266843
AT3G26300	-0.540346	6.21368	14.0218	0.000180854	0.00259616
AT4G25030	-0.540644	7.21091	14.316	0.00015468	0.0022669
AT3G14205	-0.541364	5.13053	13.3012	0.000265441	0.00361139
AT2G44450	-0.541626	6.71872	14.1529	0.000168681	0.00243703
ATCG00020	-0.541887	4.13668	9.63807	0.00190664	0.0187842
AT3G61790	-0.54199	5.30996	13.6836	0.000216512	0.00302909
AT4G18910	-0.542282	4.68075	12.1047	0.000503272	0.00618597
AT1G17860	-0.542632	7.10719	14.3827	0.000149295	0.00219854
AT2G20630	-0.543252	7.26672	14.4721	0.000142373	0.00211141
AT4G02280	-0.543523	5.41299	13.9259	0.000190316	0.00270655
AT3G30775	-0.543825	3.98207	9.16224	0.00247153	0.0231323
AT4G19960	-0.544504	3.66064	7.99485	0.00469245	0.03864
AT4G24805	-0.544768	5.29733	13.7907	0.00020451	0.00287916
AT2G15970	-0.544829	8.54628	14.6636	0.00012862	0.00194522
AT3G16340	-0.544891	5.6424	14.1222	0.000171458	0.00247183
AT5G26600	-0.545071	4.58469	11.7867	0.000596911	0.00715633
AT3G24450	-0.545454	4.45935	11.2348	0.000803229	0.00915621
AT1G53430	-0.546855	4.52788	11.6224	0.000651997	0.00765829
AT5G49460	-0.547367	7.73381	14.8013	0.000119562	0.00183715
AT5G49710	-0.547508	5.00924	13.3259	0.000261957	0.00356977
AT3G02580	-0.547658	5.67623	14.2585	0.000159474	0.00232399
AT1G69270	-0.547676	3.98272	9.30858	0.00228172	0.0216603
AT5G35370	-0.54774	5.12364	13.5928	0.000227236	0.00316463
AT1G03950	-0.547837	4.27286	10.4887	0.00120163	0.0127267
AT1G56230	-0.547967	5.32847	14.022	0.000180837	0.00259616
AT3G56800	-0.548701	8.65684	14.8607	0.000115856	0.00178813
AT5G66690	-0.549112	6.49052	14.4809	0.000141712	0.00210438
AT4G40010	-0.549492	6.36757	14.5042	0.000139972	0.002085
AT2G23320	-0.549605	4.19099	10.1713	0.00142709	0.0146928
AT5G41260	-0.549633	5.56803	14.3241	0.000154012	0.00225894
AT1G12140	-0.549753	5.29597	14.0461	0.000178537	0.00256728
AT2G04110	-0.549791	3.79558	8.66487	0.00324514	0.02885
AT2G47600	-0.549817	4.94936	13.2984	0.000265826	0.00361371
AT5G01620	-0.550217	4.25625	10.5082	0.00118901	0.0126246
AT5G10550	-0.550241	6.4883	14.5444	0.000137015	0.00204822
AT3G20470	-0.550269	6.52335	14.5385	0.000137446	0.00205284
AT1G70090	-0.550313	4.7126	12.6223	0.000381426	0.00491669
AT5G45480	-0.550979	4.32462	10.8536	0.000986554	0.0108245
AT1G07420	-0.551441	5.51422	14.3856	0.000149063	0.00219609
AT2G29700	-0.551635	5.983	14.5612	0.0001358	0.00203185
AT1G31480	-0.551719	3.78612	8.69502	0.00319191	0.0284747
AT5G59150	-0.551934	5.69826	14.4947	0.000140676	0.0020927
AT5G47200	-0.552026	7.67767	15.0411	0.000105295	0.00163817
AT3G27100	-0.55217	3.95141	9.34076	0.002242	0.0213435
AT5G04830	-0.552492	4.49799	11.7043	0.000623928	0.00740364
AT5G03555	-0.552639	4.54923	11.9565	0.00054492	0.00662279
AT1G70300	-0.552894	5.92702	14.6225	0.000131459	0.00198191
AT1G68020	-0.553091	5.58822	14.5152	0.000139155	0.00207374
AT3G54580	-0.553095	8.75186	15.0882	0.000102699	0.0016052
AT2G18300	-0.553521	5.16435	13.9733	0.000185576	0.00264585
AT5G28150	-0.553789	5.23894	14.128	0.00017093	0.00246633
AT3G60330	-0.55392	5.68796	14.6121	0.00013218	0.00198872
AT5G19790	-0.55415	3.9652	9.46727	0.00209255	0.0202127
AT5G20360	-0.554629	4.20404	10.432	0.00123908	0.013053
AT1G77660	-0.555894	3.58609	8.05082	0.00454966	0.0377417
AT1G12110	-0.555905	8.89019	15.2204	9.58e-05	0.00151009
AT1G11175	-0.556773	3.89834	9.26818	0.00233259	0.0220291
AT5G19240	-0.557467	4.76649	13.1841	0.000282547	0.00380256
AT1G58520	-0.558559	5.1281	14.1575	0.00016827	0.00243423
AT5G38700	-0.55871	3.60291	8.1891	0.00421559	0.0355853
AT3G14310	-0.559296	6.13806	15.0055	0.000107302	0.00166477
AT2G43535	-0.559825	7.7824	15.4832	8.33e-05	0.00134107
AT3G59110	-0.560772	3.88126	9.36634	0.00221094	0.0211075
AT1G60140	-0.561406	7.08042	15.3793	8.8e-05	0.00140338
AT1G17080	-0.561433	6.82794	15.2585	9.38e-05	0.00148548
AT2G43330	-0.562491	4.93733	13.9034	0.000192612	0.00273573
AT1G58280	-0.562581	4.34026	11.3718	0.000746084	0.00860994
AT2G21045	-0.56313	5.15213	14.4266	0.000145859	0.00215688
AT1G03080	-0.564531	6.56294	15.3	9.18e-05	0.00145597
AT1G59870	-0.564879	7.99041	15.779	7.13e-05	0.0011614
AT3G19460	-0.564927	4.35351	11.5369	0.000682673	0.00797401
AT1G17820	-0.565041	4.26641	11.1246	0.000852374	0.00961532
AT3G03310	-0.56561	4.11513	10.4559	0.00122319	0.012914
AT5G35970	-0.565907	3.79821	9.19129	0.00243263	0.0228284
AT5G57630	-0.56632	4.59113	12.7553	0.000355254	0.00461705
AT3G20100	-0.566337	4.60449	12.8261	0.000342059	0.00447586
AT4G30600	-0.566344	7.31073	15.7363	7.29e-05	0.00118619
AT2G05940	-0.56652	3.78734	9.15363	0.00248319	0.0232251
AT5G67340	-0.566621	3.74706	9.00043	0.00270015	0.0248939
AT2G46340	-0.566922	3.4394	7.85777	0.00506172	0.0409384
AT2G35050	-0.567867	7.83058	15.9395	6.55e-05	0.00108164
AT1G78300	-0.567949	8.07321	15.9506	6.51e-05	0.00107637
AT1G79630	-0.569098	3.91152	9.75505	0.00178907	0.0178138
AT5G56610	-0.569172	3.33123	7.55737	0.0059781	0.0464173
AT5G56350	-0.569966	7.17116	15.8876	6.73e-05	0.0011057
AT3G23600	-0.570279	7.67713	16.0459	6.19e-05	0.00103633
AT3G23640	-0.570344	7.16364	15.9079	6.66e-05	0.0010966
AT1G23800	-0.570505	6.18516	15.6182	7.76e-05	0.0012547
AT1G33240	-0.570554	7.34231	15.9783	6.41e-05	0.00106444
AT3G21100	-0.570575	3.76422	9.19309	0.00243023	0.0228122
AT4G15800	-0.570656	5.88157	15.5495	8.05e-05	0.00129733
AT4G33960	-0.570681	4.51904	12.5862	0.00038886	0.00500676
AT3G44200	-0.570748	5.5818	15.4465	8.5e-05	0.0013641
AT1G01430	-0.571257	5.76543	15.5503	8.04e-05	0.00129733
AT5G57780	-0.571562	3.58891	8.5029	0.00354698	0.0310084
AT1G65010	-0.571945	6.77967	15.811	7.01e-05	0.00114636
AT4G27410	-0.572302	5.25927	15.1335	0.000100264	0.00157373
AT2G20650	-0.572417	3.86299	9.67059	0.0018732	0.0184818
AT5G36260	-0.572512	3.57532	8.48874	0.00357468	0.0312262
AT1G05510	-0.572715	3.83097	9.53118	0.00202093	0.0196964
AT3G22880	-0.572934	4.38447	12.0155	0.00052792	0.00643713
AT1G34750	-0.573222	3.83605	9.58834	0.00195898	0.0191828
AT3G44190	-0.573523	6.29971	15.7879	7.09e-05	0.00115704
AT2G39050	-0.573523	5.34412	15.3852	8.78e-05	0.00139966
AT3G09980	-0.573619	4.98899	14.5746	0.00013484	0.00202109
AT5G65470	-0.573885	6.67264	15.847	6.87e-05	0.00112693
AT1G69010	-0.574102	4.54759	12.8909	0.000330425	0.00434597
AT3G26460	-0.574326	6.59777	15.8268	6.95e-05	0.00113793
ATMG00030	-0.574999	7.49693	16.2579	5.53e-05	0.000939706
AT3G21710	-0.575192	5.52531	15.6459	7.65e-05	0.00123701
AT1G11440	-0.575355	3.53516	8.42438	0.00370342	0.0321161
AT4G28890	-0.575366	4.23063	11.3394	0.000759222	0.00874654
AT1G72310	-0.575616	3.97398	10.2411	0.00137412	0.0142566
AT5G11700	-0.575802	6.61623	15.9204	6.61e-05	0.00109047
AT5G03380	-0.575886	5.0321	14.7902	0.000120267	0.00184463
AT3G10260	-0.575895	6.1581	15.9016	6.68e-05	0.00109868
AT3G54590	-0.576103	8.42395	16.3974	5.14e-05	0.000881962
AT4G35380	-0.576147	4.34192	11.9421	0.00054913	0.00666192
AT1G03850	-0.576874	4.85179	14.3864	0.000149003	0.00219609
AT4G12080	-0.576895	4.94781	14.6427	0.000130052	0.00196246
AT4G21490	-0.577975	4.78883	14.2738	0.000158185	0.00231022
AT1G62980	-0.578059	6.0909	16.0147	6.29e-05	0.00104827
AT2G26260	-0.578635	4.30065	11.8389	0.000580417	0.00699602
AT3G27960	-0.579087	5.81818	16.0008	6.34e-05	0.0010539
AT5G05370	-0.579938	5.49635	15.8858	6.74e-05	0.0011057
AT1G22500	-0.580016	6.29248	16.1399	5.89e-05	0.000992047
AT3G29810	-0.580283	3.23957	7.52885	0.00607347	0.0470491
AT3G54020	-0.580463	4.3994	12.4098	0.000427373	0.00539515
AT1G73580	-0.580721	3.46435	8.34202	0.00387509	0.033322
AT1G48440	-0.580951	6.06073	16.1574	5.84e-05	0.000983447
AT5G62170	-0.581001	3.40055	8.12967	0.004356	0.03645
AT3G53510	-0.582484	3.37631	8.08353	0.00446827	0.037195
AT2G03350	-0.583222	5.16401	15.4933	8.29e-05	0.00133455
AT3G17790	-0.583673	4.77817	14.4988	0.00014037	0.00208907
AT1G31070	-0.583715	6.96435	16.564	4.71e-05	0.000815274
AT2G02960	-0.583754	5.84655	16.263	5.52e-05	0.000937647
AT2G27000	-0.583794	5.19681	15.6003	7.83e-05	0.00126602
AT5G19780	-0.584551	8.28949	16.8853	3.98e-05	0.000701308
AT3G45600	-0.585801	6.67171	16.5033	4.86e-05	0.000839182
AT1G05150	-0.586858	5.8197	16.427	5.06e-05	0.000869625
AT4G35780	-0.587013	5.46057	16.2547	5.54e-05	0.0009408
AT5G43400	-0.587305	3.94895	10.5446	0.00116585	0.0124297
AT5G52280	-0.58738	5.89783	16.4853	4.91e-05	0.000846301
AT3G07570	-0.587506	5.77514	16.4427	5.02e-05	0.000863789
AT4G35230	-0.587934	6.53141	16.5825	4.66e-05	0.000808177
AT1G48540	-0.588854	4.59892	13.8252	0.000200787	0.00283057
AT4G05070	-0.589157	4.70097	14.3633	0.000150844	0.00221747
AT1G75780	-0.59015	9.05706	17.1109	3.53e-05	0.000631713
AT2G18620	-0.590215	3.65932	9.3596	0.00221908	0.0211672
AT5G61810	-0.590281	4.10195	11.3292	0.00076342	0.00878587
AT4G15340	-0.590579	4.22965	11.9498	0.000546861	0.00663678
AT1G54870	-0.590986	5.33534	16.2996	5.41e-05	0.000922527
AT2G15620	-0.591173	7.80442	17.2621	3.26e-05	0.000587751
AT5G50200	-0.591398	3.68862	9.5413	0.00200981	0.0196052
AT5G57150	-0.59189	5.30409	16.2725	5.49e-05	0.000933421
AT2G41110	-0.59255	8.1231	17.351	3.11e-05	0.000564109
AT1G71740	-0.592698	4.39798	12.9017	0.000328511	0.00432927
AT4G23100	-0.592822	7.76323	17.3491	3.11e-05	0.000564109
AT1G14070	-0.592826	3.84373	10.2676	0.00135451	0.0140749
AT2G24420	-0.593506	5.42605	16.5977	4.63e-05	0.000802969
AT1G52565	-0.593803	3.47532	8.74234	0.00311013	0.0278709
AT1G04250	-0.594389	8.89956	17.3832	3.06e-05	0.000556043
AT4G27270	-0.595377	3.64278	9.45523	0.00210633	0.0203154
AT2G46830	-0.595862	3.39993	8.54407	0.00346766	0.0304496
AT3G61160	-0.596115	3.74519	9.93492	0.00162244	0.0164223
AT2G02070	-0.596186	3.81963	10.2692	0.00135329	0.0140666
AT5G59550	-0.596334	4.67662	14.5907	0.000133695	0.00200483
AT5G45250	-0.596364	3.56056	9.13113	0.00251391	0.0234667
AT3G59950	-0.596468	5.24352	16.3919	5.16e-05	0.000883619
AT3G15020	-0.596474	6.18848	17.0562	3.63e-05	0.000647386
AT1G27020	-0.596635	5.05877	15.9207	6.61e-05	0.00109047
AT1G06000	-0.596854	3.27443	8.08799	0.00445729	0.037122
AT1G65320	-0.597016	5.24381	16.4174	5.09e-05	0.000873569
AT4G34680	-0.598037	3.22322	7.94501	0.00482343	0.0394863
AT5G17650	-0.598043	3.5069	8.99011	0.00271544	0.0249685
AT1G62820	-0.598139	5.07457	16.039	6.21e-05	0.00103856
AT3G54200	-0.598476	4.50328	13.7476	0.000209258	0.00293739
AT3G14067	-0.598477	7.49957	17.6187	2.7e-05	0.000498503
AT3G52500	-0.599029	6.15803	17.1911	3.38e-05	0.000608166
AT4G24510	-0.599453	7.47185	17.6646	2.64e-05	0.000488748
AT1G57680	-0.59988	6.93457	17.4681	2.93e-05	0.00053486
AT1G72300	-0.600243	4.0142	11.3097	0.000771455	0.00885106
AT3G21770	-0.600497	5.29475	16.7359	4.3e-05	0.000750447
AT1G47740	-0.601499	6.23124	17.3484	3.12e-05	0.000564109
AT4G18070	-0.601789	6.25651	17.37	3.08e-05	0.000559523
AT1G77500	-0.601914	5.23524	16.6758	4.44e-05	0.00077217
AT5G24170	-0.602379	3.49483	9.06896	0.00260081	0.024137
AT1G77450	-0.603205	4.28367	12.7497	0.000356319	0.00462722
AT5G66280	-0.60341	6.37742	17.464	2.93e-05	0.000535286
AT4G18970	-0.603425	8.92542	17.9079	2.32e-05	0.000436068
AT5G66490	-0.603481	3.59158	9.47746	0.00208095	0.0201181
AT2G45470	-0.604608	7.01584	17.7832	2.48e-05	0.000461749
AT4G04745	-0.605042	3.30476	8.41707	0.00371836	0.0322216
AT4G22666	-0.605674	5.82213	17.4893	2.89e-05	0.000529518
AT5G07360	-0.605855	4.79392	15.682	7.5e-05	0.00121599
AT2G31900	-0.606045	3.62082	9.71313	0.00183033	0.0181629
AT5G37540	-0.60614	3.82899	10.6749	0.00108651	0.0117479
AT5G67300	-0.606407	6.17782	17.6219	2.7e-05	0.000498203
AT5G54370	-0.607377	6.00087	17.641	2.67e-05	0.000493909
AT5G61550	-0.607616	3.07402	7.6465	0.00568979	0.0446649
AT3G17100	-0.607742	6.26522	17.6992	2.59e-05	0.000480743
AT4G02350	-0.608355	6.04757	17.7137	2.57e-05	0.000477358
AT3G48100	-0.608396	4.84731	15.9599	6.48e-05	0.00107268
AT5G45950	-0.60848	7.66213	18.2486	1.94e-05	0.000372151
AT2G43040	-0.608574	4.16184	12.3144	0.000449769	0.00563553
AT1G23330	-0.609062	3.408	8.9516	0.00277327	0.0253939
AT5G45380	-0.60922	3.07675	7.67098	0.00561313	0.0442065
AT1G17970	-0.609428	4.23069	12.7134	0.000363296	0.0047101
AT2G31980	-0.609742	7.03025	18.0919	2.11e-05	0.00040086
ATMG00020	-0.609774	11.1326	17.4906	2.89e-05	0.000529427
AT4G25610	-0.610036	3.4761	9.23372	0.00237689	0.0223866
AT1G67050	-0.610305	4.00116	11.6244	0.000651315	0.00765829
AT3G15040	-0.61076	3.99534	11.6078	0.000657132	0.0077097
AT5G56540	-0.611236	6.76333	18.0221	2.19e-05	0.000415114
AT1G44160	-0.611417	3.17753	8.11672	0.00438723	0.0366657
AT4G30340	-0.611601	5.9009	17.8564	2.39e-05	0.000446322
AT2G31360	-0.611908	6.23524	17.9448	2.28e-05	0.000429177
AT5G18690	-0.612294	4.08538	12.0789	0.000510282	0.00625786
AT5G44060	-0.612375	3.02744	7.5745	0.00592157	0.0461086
AT4G23820	-0.613255	8.02289	18.5756	1.64e-05	0.000320438
AT1G72200	-0.613497	5.77508	17.9115	2.32e-05	0.000435757
AT5G40250	-0.613929	4.1529	12.484	0.000410724	0.00523611
AT2G28470	-0.613982	7.48905	18.5339	1.67e-05	0.000326003
AT1G35260	-0.614188	4.54593	14.7227	0.000124653	0.00189718
AT3G24503	-0.614192	7.69684	18.5983	1.62e-05	0.000316827
AT2G03720	-0.61504	4.40292	13.9541	0.000187487	0.00266857
AT3G21070	-0.61539	4.78723	16.1578	5.83e-05	0.000983447
AT2G39700	-0.615617	4.47005	14.3589	0.000151195	0.00222165
AT5G61820	-0.61606	7.24343	18.5692	1.64e-05	0.000321209
AT3G62270	-0.616184	7.22461	18.5688	1.64e-05	0.000321209
AT5G42110	-0.616315	3.21401	8.39038	0.00377333	0.0325971
AT3G01310	-0.617092	6.06978	18.2249	1.97e-05	0.000376115
AT4G30320	-0.617218	3.70741	10.4634	0.00121821	0.0128777
AT1G17840	-0.618137	7.69914	18.8389	1.42e-05	0.000284533
AT3G47420	-0.618242	4.98755	16.9011	3.94e-05	0.000696578
AT5G22920	-0.61851	5.48824	18.0373	2.17e-05	0.000412054
AT4G18430	-0.61871	4.52234	14.7995	0.000119677	0.00183715
AT3G08720	-0.619029	4.92561	16.7558	4.26e-05	0.000744545
AT3G56350	-0.619465	4.12891	12.5785	0.000390466	0.00502552
AT2G24550	-0.619614	5.07084	17.2149	3.34e-05	0.000601903
AT5G44860	-0.6204	3.69585	10.5215	0.00118051	0.0125461
AT1G70520	-0.620941	4.13351	12.6623	0.000373363	0.00482386
AT3G49810	-0.621521	4.16151	12.8467	0.000338306	0.00443227
AT5G26310	-0.621617	3.69838	10.5643	0.00115347	0.0123094
AT2G19710	-0.621705	4.03633	12.2337	0.000469642	0.00583882
AT5G17280	-0.621791	4.06669	12.3715	0.000436228	0.00548222
AT2G41740	-0.621986	7.98441	19.1042	1.24e-05	0.000251844
AT5G12880	-0.622306	3.1188	8.1746	0.00424942	0.0357899
AT5G58540	-0.622403	4.57643	15.2889	9.23e-05	0.00146385
AT5G65380	-0.622579	5.44447	18.2542	1.94e-05	0.00037128
AT4G24220	-0.622773	8.04743	19.1521	1.21e-05	0.000246505
AT2G30040	-0.623198	3.64888	10.3819	0.00127317	0.0133494
AT1G06620	-0.623377	5.60984	18.3984	1.79e-05	0.0003468
AT3G20660	-0.623425	3.74233	10.8397	0.000993962	0.0108908
AT5G44720	-0.624069	5.5727	18.4204	1.77e-05	0.00034341
AT2G40110	-0.624344	6.02106	18.6252	1.59e-05	0.000313121
AT1G08320	-0.62466	5.73259	18.5447	1.66e-05	0.000324722
AT1G08760	-0.624904	4.8732	16.9369	3.87e-05	0.000684654
AT1G24170	-0.624976	6.09163	18.6863	1.54e-05	0.000304592
AT1G70890	-0.625099	7.7971	19.276	1.13e-05	0.000233145
AT1G05790	-0.625907	4.60603	15.6506	7.63e-05	0.00123456
AT1G13300	-0.626654	4.56723	15.4549	8.46e-05	0.00135866
AT3G18773	-0.627101	3.81628	11.3235	0.00076575	0.00880062
AT2G37130	-0.627558	7.91604	19.4398	1.04e-05	0.000215962
AT5G51580	-0.627798	3.0189	7.90427	0.00493325	0.0401409
AT2G24240	-0.627855	3.4166	9.52554	0.00202714	0.0197283
AT2G23300	-0.628052	3.09071	8.21889	0.00414695	0.0350851
AT1G17180	-0.628201	3.09577	8.23713	0.00410548	0.0348396
AT2G42040	-0.628577	3.53352	10.0359	0.00153591	0.0156359
AT1G12240	-0.628815	6.96711	19.1961	1.18e-05	0.000241479
AT4G32500	-0.629177	2.92369	7.60528	0.00582133	0.0454747
AT4G24780	-0.62933	3.56709	10.1943	0.00140942	0.0145377
AT2G27380	-0.629489	5.51215	18.6989	1.53e-05	0.00030337
AT2G30990	-0.629505	4.99705	17.5507	2.8e-05	0.000514094
AT1G48130	-0.62952	5.42753	18.6455	1.58e-05	0.00031017
AT5G13400	-0.629644	5.52136	18.725	1.51e-05	0.000299788
AT3G13310	-0.629787	4.42651	14.733	0.00012397	0.00189107
AT1G72770	-0.630181	5.43024	18.6957	1.54e-05	0.00030371
AT4G39080	-0.630501	8.4998	19.6035	9.54e-06	0.000200086
AT1G04280	-0.630708	5.47405	18.7511	1.49e-05	0.000296406
AT5G06280	-0.630776	3.57162	10.2399	0.00137498	0.0142568
AT5G67560	-0.63088	6.10172	19.0353	1.29e-05	0.000260161
AT4G33530	-0.631093	6.13897	19.0673	1.26e-05	0.000256148
AT1G13360	-0.631109	4.90241	17.3473	3.12e-05	0.000564109
AT5G22940	-0.631117	5.08904	17.8973	2.33e-05	0.000438058
AT5G25930	-0.632264	3.57601	10.3347	0.00130617	0.0136463
AT1G62790	-0.632686	6.98016	19.4375	1.04e-05	0.000216091
AT4G28190	-0.633166	3.09108	8.35371	0.00385024	0.0331337
AT1G01120	-0.633696	8.61956	19.7856	8.68e-06	0.000183969
AT2G40120	-0.633822	3.36931	9.51233	0.00204178	0.0198421
AT5G65430	-0.634076	8.67809	19.7985	8.62e-06	0.000182852
AT1G72700	-0.634187	6.03395	19.2321	1.16e-05	0.000237685
AT1G71880	-0.63441	5.14258	18.2374	1.95e-05	0.00037414
AT5G20885	-0.634795	4.76377	17.0451	3.65e-05	0.000650857
AT1G33470	-0.636676	5.96089	19.3631	1.08e-05	0.000223565
AT1G67880	-0.63682	4.14635	13.3951	0.000252475	0.00345773
AT2G47000	-0.637337	7.7317	20.0243	7.66e-06	0.000164252
AT4G09460	-0.637481	4.83975	17.465	2.93e-05	0.000535286
AT1G22610	-0.63755	5.61249	19.2596	1.14e-05	0.000234639
AT1G12500	-0.637707	5.32808	18.9304	1.36e-05	0.000272893
AT1G34260	-0.638289	4.02064	12.8133	0.000344401	0.00449809
AT2G42610	-0.63847	5.42004	19.1463	1.21e-05	0.000247103
AT5G27450	-0.638615	5.77155	19.3872	1.07e-05	0.000221168
AT1G56010	-0.639526	5.60361	19.3541	1.09e-05	0.000224342
AT2G17450	-0.639782	4.25044	14.1052	0.00017301	0.00249206
AT4G32350	-0.639796	4.1342	13.4595	0.000243957	0.00336267
AT5G17820	-0.63987	7.86665	20.203	6.98e-06	0.000150862
AT1G05320	-0.639997	6.25553	19.6223	9.45e-06	0.000198252
AT1G03590	-0.640028	5.38833	19.2378	1.16e-05	0.000237123
AT5G12250	-0.640167	8.92912	20.1363	7.22e-06	0.000155609
AT5G42750	-0.64123	3.2897	9.39643	0.00217494	0.0208587
AT5G01750	-0.641957	6.65564	19.7721	8.74e-06	0.000184813
AT4G30670	-0.642846	6.46779	19.8002	8.61e-06	0.000182804
AT1G17455	-0.643143	4.12822	13.5257	0.000235497	0.00326211
AT1G28400	-0.643242	5.72621	19.6588	9.27e-06	0.000194741
AT4G21740	-0.643324	3.61131	10.8499	0.000988543	0.010842
AT3G23000	-0.643699	6.55838	19.8379	8.44e-06	0.000179573
AT1G13830	-0.64379	4.20531	14.0038	0.000182595	0.00261667
AT4G20390	-0.644093	3.51842	10.464	0.0012178	0.0128773
AT1G20090	-0.644549	5.94316	19.8249	8.5e-06	0.000180683
AT4G00110	-0.644904	3.21594	9.17293	0.00245714	0.0230134
AT3G51160	-0.645355	7.19484	20.3411	6.49e-06	0.000141367
AT5G60850	-0.645579	3.97569	12.837	0.000340069	0.0044519
AT5G42650	-0.645883	4.30154	14.7063	0.000125743	0.00190944
AT5G01600	-0.646042	6.88307	20.1943	7.01e-06	0.000151443
AT2G42840	-0.646116	9.06617	20.481	6.03e-06	0.000132944
AT1G54000	-0.646211	6.32398	20.0091	7.72e-06	0.000165241
AT5G32450	-0.646265	5.32913	19.432	1.04e-05	0.000216577
AT5G56660	-0.646525	4.62921	16.822	4.11e-05	0.000722794
AT2G36430	-0.646715	3.76172	11.7537	0.000607592	0.00726056
AT1G01260	-0.646925	4.2975	14.7371	0.000123706	0.00188876
AT5G09960	-0.647054	4.70467	17.3131	3.17e-05	0.000573748
AT2G48080	-0.647497	3.47663	10.4023	0.00125921	0.0132278
AT1G52910	-0.64849	4.41989	15.5839	7.9e-05	0.00127521
AT2G15490	-0.648672	3.33639	9.82651	0.00172089	0.0172114
AT2G35880	-0.648707	7.83248	20.7549	5.23e-06	0.000116682
AT5G41140	-0.649178	5.56569	19.927	8.06e-06	0.000172055
AT4G23050	-0.649267	6.14677	20.1703	7.1e-06	0.000153061
AT4G28630	-0.649449	3.68055	11.434	0.000721531	0.00836971
AT1G78000	-0.64982	6.02657	20.1806	7.06e-06	0.000152438
AT3G02240	-0.649916	2.81467	7.72224	0.00545598	0.0433492
AT3G09925	-0.650432	6.16755	20.2513	6.8e-06	0.000147474
AT5G48290	-0.650541	3.95079	12.9029	0.000328304	0.00432823
AT5G44550	-0.652901	3.39646	10.2105	0.00139708	0.0144503
AT4G27595	-0.653174	3.59222	11.1083	0.000859885	0.00969028
AT1G67230	-0.6532	6.31121	20.4439	6.15e-06	0.000135187
AT4G23270	-0.653928	5.16837	19.4483	1.04e-05	0.000215142
AT2G03240	-0.654068	5.27773	19.7723	8.74e-06	0.000184813
AT3G16450	-0.654301	9.31192	20.9364	4.76e-06	0.000107375
AT2G31010	-0.654336	3.45934	10.5356	0.00117152	0.0124789
AT4G35410	-0.655142	3.92267	12.9534	0.000319574	0.0042264
AT3G22104	-0.655525	3.07297	8.85806	0.00291901	0.0265117
AT1G22230	-0.655943	2.73771	7.59394	0.00585806	0.0456752
AT5G44190	-0.655996	3.43426	10.4719	0.00121264	0.0128326
AT1G53680	-0.656	2.94492	8.33393	0.00389239	0.0334451
AT1G44760	-0.656926	3.04303	8.76065	0.00307907	0.0276664
AT1G08190	-0.65733	7.22096	21.1071	4.35e-06	9.91e-05
AT5G03570	-0.657373	5.06592	19.3265	1.1e-05	0.000227336
AT2G23560	-0.657525	2.96892	8.46605	0.00361954	0.0314789
AT4G32140	-0.657688	5.12625	19.531	9.91e-06	0.000206791
AT1G11700	-0.658023	2.8376	8.00315	0.00467099	0.0385102
AT4G03330	-0.658034	3.39659	10.3525	0.00129362	0.0135343
AT1G62320	-0.658052	3.23988	9.67831	0.00186534	0.0184396
AT3G20015	-0.65845	5.07176	19.4124	1.05e-05	0.000218682
AT2G02820	-0.658822	4.9281	18.9625	1.34e-05	0.000269298
AT4G33640	-0.659122	6.31795	20.7984	5.11e-06	0.000114589
AT3G11900	-0.660265	3.64491	11.6229	0.00065184	0.00765829
AT2G33790	-0.660364	5.69551	20.6877	5.42e-06	0.000120285
AT5G37070	-0.660496	3.71918	12.0226	0.000525936	0.0064176
AT2G23540	-0.660551	3.53055	11.0635	0.000880893	0.00988394
AT1G66400	-0.661737	2.88316	8.24672	0.00408385	0.0347488
AT2G26640	-0.662613	4.94704	19.2298	1.16e-05	0.000237826
AT4G39270	-0.663008	5.29481	20.362	6.42e-06	0.000140183
AT1G62300	-0.663144	4.44092	16.4277	5.06e-05	0.000869625
AT2G30575	-0.6634	4.13894	14.4776	0.000141962	0.00210624
AT2G15480	-0.663764	3.43995	10.7477	0.00104461	0.0113716
AT1G78340	-0.663993	3.94295	13.4146	0.00024987	0.00343011
AT3G23470	-0.66432	2.9364	8.52599	0.00350226	0.0306893
AT4G12420	-0.664549	8.23806	21.7807	3.06e-06	7.21e-05
AT1G72130	-0.664949	4.4551	16.6015	4.62e-05	0.000802184
AT3G17780	-0.664977	5.35981	20.6611	5.49e-06	0.000121885
AT1G30440	-0.665428	5.93005	21.1112	4.34e-06	9.89e-05
AT1G73680	-0.666006	5.52908	20.9288	4.78e-06	0.000107697
AT2G46710	-0.666048	5.56685	20.957	4.71e-06	0.00010634
AT1G54090	-0.666093	5.54162	20.9359	4.76e-06	0.000107375
AT1G72180	-0.6666	6.11036	21.2479	4.04e-06	9.29e-05
AT4G21600	-0.666717	6.11278	21.2464	4.05e-06	9.29e-05
AT1G61100	-0.666779	6.91025	21.5295	3.49e-06	8.12e-05
AT3G57070	-0.667118	4.50725	17.0687	3.61e-05	0.000643827
AT1G62422	-0.667285	3.5163	11.1866	0.000824347	0.00934621
AT4G15760	-0.667348	5.29809	20.6199	5.61e-06	0.000124213
AT5G53120	-0.667706	4.78427	18.9846	1.32e-05	0.000266526
AT5G65390	-0.668468	7.33114	21.8631	2.93e-06	6.96e-05
AT4G35030	-0.668861	3.41002	10.7686	0.00103291	0.0112527
AT1G20780	-0.6691	5.3233	20.8114	5.08e-06	0.000113895
AT4G32940	-0.670084	6.7595	21.6169	3.34e-06	7.79e-05
AT1G29025	-0.670166	7.92804	22.1441	2.53e-06	6.1e-05
AT5G57110	-0.670427	7.23571	21.9582	2.79e-06	6.65e-05
AT2G23620	-0.670454	5.97972	21.4312	3.67e-06	8.53e-05
AT2G33390	-0.670795	3.39878	10.7684	0.00103302	0.0112527
AT1G09750	-0.671194	6.18559	21.5327	3.49e-06	8.12e-05
AT4G05050	-0.671554	8.95014	22.1355	2.55e-06	6.12e-05
AT4G38810	-0.671675	4.88097	19.5323	9.91e-06	0.000206783
AT5G58940	-0.671816	4.54589	17.5835	2.75e-05	0.000506398
AT4G36640	-0.67214	5.14939	20.4689	6.07e-06	0.000133607
AT2G02990	-0.672796	4.06459	14.4262	0.000145889	0.00215688
AT2G24100	-0.672983	3.88997	13.4449	0.000245866	0.00338481
AT2G32300	-0.673724	6.66305	21.7637	3.09e-06	7.26e-05
AT4G38420	-0.673797	2.60422	7.52315	0.00609273	0.0471466
AT5G21950	-0.674	3.2655	10.2307	0.0013819	0.0143152
AT5G60300	-0.675256	5.41015	21.4071	3.72e-06	8.62e-05
AT3G19380	-0.675872	3.17001	9.8513	0.00169785	0.0170266
AT4G16670	-0.676241	7.27956	22.3509	2.28e-06	5.54e-05
AT4G32920	-0.676918	4.59737	18.2182	1.97e-05	0.000376843
AT5G57740	-0.67801	4.79304	19.5935	9.59e-06	0.000201017
AT3G15820	-0.67873	4.70254	19.0218	1.29e-05	0.000261844
AT1G70140	-0.679552	3.24071	10.3121	0.0013222	0.0137861
AT5G07460	-0.679856	5.59998	21.8332	2.98e-06	7.05e-05
AT1G19700	-0.680117	4.36717	16.7485	4.27e-05	0.000746642
AT3G05165	-0.680274	7.27265	22.6121	1.99e-06	4.93e-05
AT4G19230	-0.680892	4.13836	15.23	9.53e-05	0.00150383
AT5G12900	-0.681572	2.79275	8.40926	0.00373435	0.0323102
AT1G31935	-0.681674	3.79325	13.2377	0.000274572	0.0037101
AT2G38740	-0.681963	4.03543	14.6784	0.000127618	0.00193267
AT2G16250	-0.682427	2.93486	8.98032	0.00273003	0.0250937
AT4G35110	-0.682707	4.2827	16.2902	5.44e-05	0.000926149
AT3G28930	-0.682971	3.40293	11.1586	0.000836875	0.00946909
AT2G16005	-0.68388	6.24373	22.3742	2.25e-06	5.49e-05
AT5G55960	-0.684391	5.69352	22.1922	2.47e-06	5.96e-05
AT4G40090	-0.68448	7.10968	22.8048	1.8e-06	4.49e-05
AT2G42380	-0.684944	4.19819	15.7897	7.09e-05	0.00115649
AT2G14100	-0.685028	4.45684	17.6404	2.67e-05	0.000493909
AT5G17910	-0.685491	5.86817	22.3698	2.25e-06	5.49e-05
AT4G00900	-0.685887	4.98939	20.7554	5.23e-06	0.000116682
AT3G11600	-0.686404	4.85687	20.2803	6.7e-06	0.00014535
AT4G32650	-0.686486	5.4354	22.1418	2.54e-06	6.1e-05
AT3G57330	-0.687003	5.68528	22.3735	2.25e-06	5.49e-05
AT3G05270	-0.687187	4.64409	19.087	1.25e-05	0.000253817
AT4G02050	-0.687196	5.54577	22.2641	2.38e-06	5.76e-05
AT5G07220	-0.687311	7.06411	22.9615	1.66e-06	4.16e-05
AT3G09810	-0.687667	5.95954	22.5446	2.06e-06	5.07e-05
AT4G17215	-0.68794	4.26436	16.392	5.16e-05	0.000883619
AT2G45720	-0.688083	4.27927	16.4986	4.87e-05	0.00084082
AT1G74410	-0.688218	3.19444	10.3243	0.00131349	0.0137165
AT1G24130	-0.689447	2.62983	7.97213	0.00475171	0.0390419
AT4G32150	-0.689541	7.61162	23.3621	1.34e-06	3.44e-05
AT4G12550	-0.689889	7.33395	23.2797	1.4e-06	3.58e-05
AT3G12620	-0.691422	5.36725	22.3352	2.29e-06	5.58e-05
AT4G34630	-0.691576	3.9377	14.4816	0.000141658	0.00210438
AT5G54590	-0.691636	3.94397	14.5361	0.000137622	0.00205363
AT1G79410	-0.691748	4.10098	15.4696	8.39e-05	0.00134948
AT1G74660	-0.692419	4.10276	15.5252	8.15e-05	0.0013135
AT2G34680	-0.693156	6.07556	22.9505	1.67e-06	4.18e-05
AT4G16110	-0.693429	4.60181	19.1137	1.23e-05	0.00025075
AT2G40170	-0.693625	4.9901	21.2094	4.13e-06	9.44e-05
AT3G24550	-0.694116	6.17081	23.0291	1.6e-06	4.05e-05
AT3G13965	-0.694263	2.69139	8.32486	0.00391185	0.0335576
AT2G17120	-0.694321	5.52331	22.7111	1.89e-06	4.7e-05
AT4G18197	-0.694999	2.52574	7.68535	0.00556861	0.043897
AT1G69780	-0.695514	5.11234	21.77	3.08e-06	7.24e-05
AT3G18820	-0.696294	7.5164	23.7857	1.08e-06	2.82e-05
AT3G52710	-0.696839	4.33505	17.3262	3.15e-05	0.000570098
AT3G56930	-0.697587	5.53665	22.9447	1.67e-06	4.19e-05
AT5G43350	-0.697634	4.74054	20.394	6.31e-06	0.000138303
AT5G20280	-0.697956	7.22634	23.7704	1.09e-06	2.84e-05
AT5G10230	-0.698062	3.38953	11.6188	0.000653254	0.00767037
AT1G12330	-0.69842	5.27736	22.5032	2.1e-06	5.17e-05
AT1G52000	-0.698541	4.53168	18.8679	1.4e-05	0.000280969
AT4G28730	-0.698558	2.80145	8.85202	0.00292869	0.0265781
AT5G66400	-0.699266	6.57981	23.3752	1.34e-06	3.42e-05
AT3G60130	-0.699436	6.71056	23.4893	1.26e-06	3.24e-05
AT3G45700	-0.699891	5.11852	22.0714	2.63e-06	6.3e-05
AT1G56660	-0.699921	5.59789	23.1572	1.5e-06	3.8e-05
AT3G50280	-0.700049	3.40956	11.7659	0.000603629	0.00722141
AT5G10750	-0.700423	4.60293	19.505	1e-05	0.000209239
AT4G34135	-0.700924	4.24285	16.8533	4.04e-05	0.000711702
AT2G28110	-0.700992	4.48398	18.6489	1.57e-05	0.000309967
AT4G08930	-0.701034	3.70366	13.4368	0.000246928	0.00339527
AT3G07020	-0.701171	5.87571	23.3869	1.33e-06	3.4e-05
AT2G38090	-0.701832	4.11463	16.0205	6.27e-05	0.00104561
AT5G19110	-0.703288	3.55667	12.6189	0.00038212	0.00492375
AT3G07940	-0.703371	4.26267	17.1024	3.55e-05	0.000634192
AT1G13740	-0.703705	3.10824	10.3576	0.00129002	0.0135008
AT1G12310	-0.703707	6.80102	23.8496	1.04e-06	2.74e-05
AT3G29180	-0.703909	7.09185	24.0885	9.22e-07	2.45e-05
AT4G15380	-0.70409	2.76083	8.82836	0.0029669	0.0268813
AT5G05190	-0.704222	2.81064	9.0558	0.0026196	0.0243047
AT3G26440	-0.706347	4.788	21.2267	4.09e-06	9.36e-05
AT1G69640	-0.70733	5.25492	22.995	1.63e-06	4.11e-05
AT3G58120	-0.70781	6.2446	23.9426	9.95e-07	2.62e-05
AT1G29510	-0.707874	2.6252	8.3477	0.003863	0.033235
AT3G23090	-0.708131	7.56863	24.6137	7.02e-07	1.9e-05
AT1G12990	-0.708584	4.67304	20.5003	5.97e-06	0.000131782
AT2G22170	-0.70877	8.63407	24.6959	6.73e-07	1.83e-05
AT3G55880	-0.709719	4.03969	15.8945	6.7e-05	0.00110224
AT3G56050	-0.7098	6.05173	24.0285	9.51e-07	2.52e-05
AT5G13820	-0.709838	4.68981	20.7098	5.35e-06	0.000119141
AT5G06800	-0.710177	3.63542	13.3638	0.000256727	0.00350704
AT2G15790	-0.711029	4.06143	16.0984	6.02e-05	0.00101148
AT3G47210	-0.711326	3.17088	10.9106	0.000956673	0.0105614
AT3G18850	-0.711596	2.64883	8.54744	0.00346124	0.0304012
AT1G10090	-0.711667	4.59012	20.0299	7.64e-06	0.000163875
AT4G19670	-0.711806	6.09143	24.1746	8.82e-07	2.35e-05
AT1G29500	-0.712174	3.13245	10.7284	0.0010556	0.0114726
AT5G45500	-0.71238	5.18026	23.0638	1.57e-06	3.98e-05
AT3G05880	-0.712426	7.4489	24.8557	6.19e-07	1.7e-05
AT3G44510	-0.712437	3.32219	11.7365	0.000613227	0.00730184
AT3G25585	-0.712767	5.7691	24.0945	9.19e-07	2.44e-05
AT1G74740	-0.71281	4.92042	22.1272	2.56e-06	6.14e-05
AT3G19390	-0.713127	6.27189	24.3011	8.26e-07	2.21e-05
AT2G39890	-0.714309	4.21797	17.2916	3.21e-05	0.000579341
AT5G53380	-0.714442	2.95911	9.91625	0.00163898	0.0165598
AT5G07680	-0.714466	5.11493	22.9422	1.67e-06	4.19e-05
AT4G21910	-0.714499	4.61935	20.4257	6.21e-06	0.000136247
AT3G22850	-0.714717	6.57933	24.4059	7.82e-07	2.1e-05
AT3G11330	-0.7155	5.63987	24.2007	8.7e-07	2.32e-05
AT1G30620	-0.715712	3.94885	15.5969	7.85e-05	0.00126718
AT5G03040	-0.715824	7.76954	25.2098	5.16e-07	1.43e-05
AT5G06980	-0.716297	3.61125	13.4348	0.000247193	0.00339752
AT4G14746	-0.716625	4.75599	21.5922	3.38e-06	7.89e-05
AT1G54040	-0.717135	2.93239	9.86625	0.00168411	0.0169141
AT4G08300	-0.717267	3.2005	11.2207	0.000809343	0.00919783
AT5G60860	-0.717413	4.8013	21.9052	2.87e-06	6.82e-05
AT1G01140	-0.718388	5.98715	24.5786	7.15e-07	1.94e-05
AT3G07900	-0.718448	3.41197	12.413	0.000426632	0.00538984
AT1G74840	-0.718493	7.07433	25.0698	5.54e-07	1.53e-05
AT4G33550	-0.720629	5.9212	24.7021	6.71e-07	1.83e-05
AT3G55320	-0.720864	4.36109	18.7409	1.5e-05	0.000297478
AT5G17300	-0.721414	3.0588	10.6143	0.00112273	0.0120541
AT1G08650	-0.722069	4.02594	16.3588	5.25e-05	0.000897359
AT2G25000	-0.722204	2.99541	10.3054	0.00132701	0.0138319
AT3G21370	-0.722616	4.9784	22.966	1.65e-06	4.16e-05
AT3G54120	-0.722774	2.99316	10.3179	0.00131806	0.0137557
AT3G21230	-0.723053	4.94431	22.8596	1.75e-06	4.37e-05
AT5G08080	-0.723107	6.3718	24.9815	5.8e-07	1.6e-05
AT1G77130	-0.723421	6.05478	24.9419	5.92e-07	1.63e-05
AT2G03730	-0.723818	4.10893	16.9921	3.76e-05	0.000667506
AT3G01520	-0.723948	6.69977	25.128	5.38e-07	1.49e-05
AT1G17170	-0.724291	5.26522	24.133	9.01e-07	2.4e-05
AT4G36880	-0.724396	9.34183	25.6024	4.21e-07	1.19e-05
AT2G36310	-0.724424	6.33229	25.0667	5.55e-07	1.53e-05
AT4G22810	-0.724588	4.45278	19.6437	9.35e-06	0.000196169
AT5G55970	-0.724647	3.82659	15.1541	9.92e-05	0.00155964
AT2G25240	-0.724688	4.07112	16.7943	4.17e-05	0.000732252
AT4G21120	-0.725746	2.29818	7.45038	0.00634394	0.0487733
AT3G41979	-0.725973	2.72539	9.20453	0.00241509	0.0226955
AT3G52840	-0.726768	3.99558	16.3561	5.25e-05	0.000898156
AT5G66800	-0.726913	2.81513	9.63348	0.00191141	0.01882
AT2G42760	-0.727006	2.66054	8.97117	0.00274373	0.0251852
AT2G20562	-0.72743	2.82384	9.67841	0.00186524	0.0184396
AT1G17360	-0.727514	4.84615	22.746	1.85e-06	4.62e-05
AT4G00300	-0.728543	6.66934	25.4161	4.63e-07	1.3e-05
AT5G41400	-0.728566	4.16147	17.5315	2.83e-05	0.000518737
AT5G01830	-0.729118	4.77886	22.5379	2.06e-06	5.09e-05
AT5G60270	-0.729162	2.26716	7.40932	0.00649037	0.0496492
AT1G30280	-0.72961	2.91272	10.1284	0.00146065	0.0149926
AT5G47370	-0.730018	6.18273	25.438	4.58e-07	1.29e-05
AT4G08230	-0.730329	3.95199	16.226	5.63e-05	0.000953275
AT4G29350	-0.730572	9.20337	26.08	3.28e-07	9.43e-06
AT3G50300	-0.730944	3.6389	14.1538	0.000168598	0.00243688
AT1G65900	-0.73127	2.41029	8.01993	0.0046279	0.0382303
AT4G14465	-0.731881	5.58945	25.2473	5.06e-07	1.41e-05
AT1G46554	-0.732052	3.18397	11.6142	0.000654886	0.00768685
AT5G25820	-0.732534	4.7278	22.3225	2.31e-06	5.61e-05
AT4G24580	-0.732785	3.26373	12.0902	0.000507191	0.00622959
AT1G14330	-0.733437	4.04607	16.9961	3.75e-05	0.000666436
AT1G56330	-0.733723	7.61972	26.4228	2.75e-07	8.04e-06
AT3G12040	-0.733981	2.79211	9.7168	0.00182668	0.0181346
AT5G62480	-0.734005	4.68579	22.062	2.65e-06	6.33e-05
AT1G66760	-0.734074	3.58448	13.8975	0.000193214	0.00274312
AT1G17340	-0.734621	5.06362	24.0591	9.36e-07	2.48e-05
AT2G39450	-0.734824	4.36988	19.5492	9.82e-06	0.000205214
AT1G22160	-0.735277	2.892	10.1956	0.0014084	0.014536
AT5G55990	-0.735866	4.04424	17.0932	3.56e-05	0.000636267
AT3G51810	-0.736199	4.58364	21.3744	3.78e-06	8.77e-05
AT3G56080	-0.736444	3.75544	15.166	9.86e-05	0.00155058
AT1G53560	-0.737121	4.95793	23.787	1.08e-06	2.82e-05
AT4G27745	-0.73715	4.30255	19.0683	1.26e-05	0.000256148
AT3G12977	-0.73719	3.35077	12.6906	0.000367757	0.00475805
AT3G61270	-0.737297	4.53562	21.0338	4.52e-06	0.000102441
AT3G52060	-0.737526	7.01546	26.3594	2.84e-07	8.29e-06
AT1G66150	-0.738211	6.73362	26.1584	3.15e-07	9.1e-06
AT2G01200	-0.738353	3.40306	13.0162	0.000309028	0.0041047
AT1G67570	-0.738476	3.04189	11.0354	0.000894379	0.0100052
AT3G05490	-0.739233	7.1681	26.5856	2.53e-07	7.43e-06
AT5G14790	-0.739805	5.22578	25.0142	5.71e-07	1.57e-05
AT5G11970	-0.740363	5.88575	26.0301	3.37e-07	9.66e-06
AT5G55480	-0.740442	6.21159	26.1688	3.14e-07	9.06e-06
AT5G44700	-0.741005	4.02146	17.1853	3.39e-05	0.000609698
AT4G33440	-0.74109	2.58599	8.99441	0.00270906	0.0249362
AT1G77740	-0.741213	5.9375	26.14	3.18e-07	9.17e-06
AT4G38340	-0.741447	2.57718	8.94406	0.00278474	0.0254712
AT1G14580	-0.741552	4.01409	17.1544	3.45e-05	0.000618393
AT2G20670	-0.741653	4.99257	24.1969	8.72e-07	2.33e-05
AT1G05620	-0.741709	6.13033	26.2316	3.04e-07	8.79e-06
AT2G24150	-0.74234	5.8338	26.1331	3.2e-07	9.19e-06
AT5G04020	-0.742384	5.02399	24.4134	7.79e-07	2.1e-05
AT4G27860	-0.742416	6.26174	26.3128	2.91e-07	8.45e-06
AT4G18010	-0.742468	2.59062	9.03253	0.00265315	0.0245482
AT4G02940	-0.742504	5.29795	25.4719	4.5e-07	1.27e-05
AT1G01200	-0.742692	3.80823	15.7705	7.16e-05	0.00116603
AT1G20490	-0.743041	3.28544	12.5421	0.000398157	0.00510885
AT3G54030	-0.743059	5.78212	26.1739	3.13e-07	9.04e-06
AT4G23430	-0.743083	6.12904	26.322	2.9e-07	8.42e-06
AT2G41880	-0.743169	3.6472	14.6921	0.000126691	0.00192123
AT4G12270	-0.743348	2.83767	10.1763	0.00142325	0.0146623
AT5G59920	-0.743672	3.17024	11.91	0.000558691	0.0067584
AT4G18380	-0.743931	5.13372	24.9416	5.92e-07	1.63e-05
AT1G64400	-0.744037	2.22524	7.56482	0.00595345	0.0462711
AT1G13900	-0.74412	4.72657	23.026	1.6e-06	4.05e-05
AT5G15600	-0.744131	4.26845	19.2117	1.17e-05	0.000239798
AT1G70850	-0.744389	8.65514	27.2091	1.83e-07	5.52e-06
AT3G51470	-0.744489	3.25928	12.4382	0.000420921	0.00533574
AT1G08990	-0.744598	4.40394	20.3446	6.48e-06	0.00014128
AT5G03080	-0.745699	5.41291	26.029	3.37e-07	9.66e-06
AT3G44820	-0.745805	3.77787	15.7152	7.37e-05	0.00119774
AT1G34510	-0.745874	6.30529	26.5675	2.55e-07	7.49e-06
AT2G26570	-0.746965	5.62141	26.3272	2.89e-07	8.4e-06
AT4G05170	-0.747208	2.84422	10.3004	0.00133065	0.0138656
AT3G01570	-0.747528	5.15088	25.2341	5.09e-07	1.42e-05
AT3G20210	-0.748096	3.10406	11.6471	0.000643391	0.00758105
AT1G70420	-0.748157	3.36101	13.1325	0.000290425	0.00388834
AT5G07820	-0.748279	4.84126	23.9976	9.67e-07	2.55e-05
AT5G64510	-0.748615	2.89092	10.5562	0.00115859	0.0123601
AT5G65790	-0.748665	3.4166	13.4752	0.000241919	0.00333869
AT3G01510	-0.750235	2.91435	10.7225	0.00105895	0.0114924
AT5G24870	-0.750304	4.45038	21.0498	4.48e-06	0.000101726
AT5G18840	-0.75102	3.40859	13.5195	0.000236278	0.00327022
AT3G62660	-0.751464	5.5905	26.6114	2.49e-07	7.35e-06
AT1G48260	-0.752091	2.97184	11.036	0.000894062	0.010005
AT5G28913	-0.752136	3.60602	14.7422	0.000123369	0.00188531
AT5G11740	-0.752159	7.99324	27.8273	1.33e-07	4.16e-06
AT1G67560	-0.752857	5.79842	26.8696	2.18e-07	6.5e-06
AT3G49370	-0.753261	2.95726	10.9978	0.000912693	0.0101694
AT3G26450	-0.753808	8.00048	27.9482	1.25e-07	3.93e-06
AT1G66350	-0.753857	4.91481	24.6502	6.89e-07	1.87e-05
AT3G02570	-0.754976	5.48662	26.7464	2.33e-07	6.89e-06
AT3G15890	-0.755668	2.92802	10.923	0.000950293	0.0105048
AT1G54030	-0.755845	6.72623	27.3986	1.66e-07	5.05e-06
AT2G44500	-0.756526	6.53854	27.3112	1.74e-07	5.25e-06
AT3G05935	-0.757509	2.28085	8.03791	0.0045822	0.037974
AT5G19390	-0.758153	6.03285	27.3655	1.69e-07	5.12e-06
AT4G33080	-0.758638	5.94478	27.3651	1.69e-07	5.12e-06
AT1G23390	-0.758787	5.06261	25.6311	4.14e-07	1.17e-05
AT5G19250	-0.758821	6.00444	27.3943	1.66e-07	5.05e-06
AT1G72470	-0.758926	5.45458	26.9984	2.04e-07	6.13e-06
AT5G60570	-0.759195	6.17844	27.4815	1.59e-07	4.86e-06
AT5G54250	-0.759231	4.36664	20.7789	5.16e-06	0.000115457
AT5G22850	-0.759665	5.05407	25.6604	4.08e-07	1.16e-05
AT5G42010	-0.761105	2.20356	7.81359	0.00518696	0.0417704
AT1G18140	-0.761206	3.95353	17.6124	2.71e-05	0.000499856
AT2G34770	-0.762034	5.76151	27.4795	1.59e-07	4.86e-06
AT5G47910	-0.76302	4.46982	21.9024	2.87e-06	6.83e-05
AT5G02420	-0.763294	3.3663	13.6902	0.000215743	0.00302338
AT3G46230	-0.763484	2.62928	9.72558	0.00181798	0.0180642
AT3G18490	-0.763544	6.19037	27.7883	1.36e-07	4.24e-06
AT5G62920	-0.764462	4.32754	20.7174	5.33e-06	0.000118752
AT5G65800	-0.764574	5.46138	27.3939	1.66e-07	5.05e-06
AT3G28345	-0.764797	6.96379	28.283	1.05e-07	3.37e-06
AT4G11910	-0.765397	2.58893	9.58782	0.00195953	0.0191828
AT1G61795	-0.765602	3.10256	12.1877	0.000481373	0.00596782
AT3G50980	-0.766419	3.10472	12.2287	0.000470894	0.00585005
AT5G59490	-0.766607	3.93911	17.7444	2.53e-05	0.000470481
AT3G24300	-0.767099	3.80979	16.8292	4.09e-05	0.000720435
AT1G15400	-0.767278	6.16418	28.054	1.18e-07	3.74e-06
AT5G46790	-0.76728	4.03348	18.4867	1.71e-05	0.000333012
AT3G04910	-0.767844	7.36956	28.7894	8.1e-08	2.64e-06
AT1G01060	-0.768376	4.37012	21.3172	3.9e-06	9.01e-05
AT1G51170	-0.768945	4.22216	20.0215	7.67e-06	0.000164385
AT1G10200	-0.7691	7.14011	28.7335	8.33e-08	2.72e-06
AT3G54400	-0.769945	7.62962	29.0628	7.03e-08	2.32e-06
AT1G61950	-0.770173	2.07496	7.50379	0.00615856	0.0475219
AT1G28670	-0.770456	4.4452	22.1134	2.58e-06	6.17e-05
AT3G47040	-0.770468	4.22665	20.1583	7.14e-06	0.000153928
AT4G35985	-0.770664	2.95355	11.4876	0.000701013	0.00817402
AT1G76690	-0.771213	5.64248	28.0442	1.19e-07	3.75e-06
AT4G23450	-0.771266	2.68477	10.1927	0.00141066	0.0145414
AT5G65920	-0.771414	3.91116	17.7395	2.54e-05	0.000471432
AT5G40730	-0.771809	9.16961	29.0813	6.96e-08	2.3e-06
AT4G10840	-0.772317	7.58335	29.227	6.46e-08	2.15e-06
AT4G13180	-0.77235	6.50069	28.4509	9.64e-08	3.11e-06
AT3G57800	-0.772485	5.77364	28.2272	1.08e-07	3.44e-06
AT1G08920	-0.772593	4.48473	22.5843	2.02e-06	4.99e-05
AT3G16440	-0.773324	4.85065	25.6542	4.09e-07	1.16e-05
AT3G02460	-0.773741	5.45609	28.0287	1.2e-07	3.78e-06
AT2G47930	-0.774699	5.08178	26.7606	2.31e-07	6.85e-06
AT5G66950	-0.77505	5.11441	26.9641	2.08e-07	6.24e-06
AT5G13700	-0.775053	2.68168	10.2759	0.00134843	0.0140247
AT5G54840	-0.775093	3.51949	15.0715	0.000103612	0.00161647
AT3G15356	-0.77604	6.59295	28.7043	8.46e-08	2.75e-06
AT1G09250	-0.776239	5.01972	26.5967	2.51e-07	7.4e-06
AT2G16890	-0.776798	2.63737	10.1055	0.00147897	0.0151258
AT3G62260	-0.777487	3.79651	17.1719	3.42e-05	0.000613689
AT3G26590	-0.777769	2.87352	11.2766	0.000785358	0.00897991
AT2G25810	-0.777797	7.1771	29.4044	5.89e-08	1.97e-06
AT4G36540	-0.778428	5.31202	27.9963	1.22e-07	3.84e-06
AT3G01420	-0.778611	7.63661	29.7208	5.01e-08	1.7e-06
AT5G47180	-0.778808	5.45039	28.3915	9.94e-08	3.2e-06
AT4G03820	-0.779537	4.67	24.7	6.71e-07	1.83e-05
AT3G03450	-0.779583	3.82448	17.4847	2.9e-05	0.000530501
AT3G60440	-0.780105	4.28598	21.1904	4.17e-06	9.52e-05
AT3G46290	-0.781209	5.93043	28.9795	7.34e-08	2.42e-06
AT2G18210	-0.781565	3.38586	14.486	0.000141327	0.00210053
AT4G22780	-0.782035	3.99993	18.9314	1.36e-05	0.000272893
AT3G17050	-0.782169	3.92842	18.3943	1.8e-05	0.000347338
AT1G10360	-0.783498	2.08916	7.81303	0.00518856	0.0417732
AT5G61340	-0.785408	5.13736	27.7547	1.38e-07	4.3e-06
AT3G59440	-0.785523	2.7169	10.7139	0.00106385	0.0115325
AT5G07620	-0.785722	2.01014	7.5402	0.00603535	0.0467862
AT2G42570	-0.786622	5.64511	29.1633	6.68e-08	2.22e-06
AT4G20860	-0.786756	4.63847	24.8413	6.24e-07	1.71e-05
AT1G69160	-0.786902	2.1197	8.00272	0.0046721	0.0385102
AT4G36945	-0.787308	3.91291	18.506	1.7e-05	0.000330612
AT1G49500	-0.787375	4.62824	24.768	6.48e-07	1.77e-05
AT4G34230	-0.787469	7.28034	30.1998	3.91e-08	1.35e-06
AT5G36940	-0.787554	5.57052	29.1708	6.65e-08	2.21e-06
AT3G61430	-0.787887	10.253	29.8212	4.75e-08	1.62e-06
AT4G10860	-0.787953	3.02745	12.4423	0.000419989	0.00533217
AT1G12845	-0.788486	3.99296	19.163	1.2e-05	0.000245402
AT3G06460	-0.788808	2.47704	9.61501	0.00193073	0.0189769
AT5G17000	-0.788839	2.93771	11.9413	0.000549362	0.00666233
AT2G20570	-0.789174	2.51372	9.81243	0.0017341	0.0173281
AT1G55430	-0.789237	2.0697	7.84445	0.00509914	0.0412014
AT1G57570	-0.789382	2.18885	8.33494	0.00389021	0.0334349
AT5G44480	-0.789393	5.2956	28.7209	8.39e-08	2.73e-06
AT2G21820	-0.789823	3.4886	15.4073	8.67e-05	0.00138807
AT5G57480	-0.79	4.53472	24.0534	9.39e-07	2.49e-05
AT1G10550	-0.790374	6.20146	29.7455	4.94e-08	1.68e-06
AT3G63470	-0.79067	4.91272	27.0761	1.96e-07	5.9e-06
AT5G14690	-0.790809	3.32809	14.4408	0.000144763	0.00214401
AT3G25110	-0.791221	4.05359	19.8092	8.57e-06	0.00018206
AT5G53020	-0.791613	3.60932	16.3435	5.29e-05	0.000903221
AT1G24120	-0.792153	5.08526	27.9864	1.23e-07	3.86e-06
AT5G10930	-0.792193	5.34349	29.1172	6.84e-08	2.26e-06
AT1G32640	-0.792639	6.37336	29.9482	4.45e-08	1.53e-06
AT2G45400	-0.792832	5.97511	29.8434	4.7e-08	1.61e-06
AT2G38610	-0.793044	5.51629	29.4882	5.65e-08	1.9e-06
AT5G01330	-0.793118	5.41614	29.401	5.9e-08	1.98e-06
AT3G02515	-0.79454	5.61664	29.715	5.02e-08	1.71e-06
AT3G12610	-0.794847	9.91126	30.5137	3.33e-08	1.16e-06
AT3G05910	-0.79495	7.09039	30.63	3.13e-08	1.1e-06
AT4G15610	-0.795314	6.5934	30.1224	4.07e-08	1.41e-06
AT2G29550	-0.796624	7.13403	30.794	2.88e-08	1.02e-06
AT3G18780	-0.796787	10.1543	30.5452	3.27e-08	1.14e-06
AT4G32300	-0.797398	4.5492	24.648	6.9e-07	1.87e-05
AT5G41410	-0.797407	2.8431	11.6996	0.000625513	0.00741459
AT5G54530	-0.797723	2.33004	9.09882	0.00255871	0.0238319
AT3G54140	-0.798802	5.70373	30.0953	4.13e-08	1.42e-06
AT1G18835	-0.799872	2.75226	11.2964	0.000777008	0.00890102
AT2G06850	-0.800387	10.3853	30.6459	3.11e-08	1.09e-06
AT3G60280	-0.800429	3.9937	19.7782	8.71e-06	0.000184453
AT2G27500	-0.801602	4.86324	27.5813	1.51e-07	4.66e-06
AT2G26420	-0.801746	2.12298	8.32938	0.00390214	0.0334946
AT1G69260	-0.802603	4.65682	26.0086	3.41e-07	9.76e-06
AT3G17185	-0.80371	2.71588	11.2035	0.000816902	0.00927118
AT2G42580	-0.803871	6.38038	30.7928	2.88e-08	1.02e-06
AT1G35180	-0.804042	2.81835	11.7532	0.000607737	0.00726056
AT1G79590	-0.804323	5.87363	30.6416	3.12e-08	1.09e-06
AT5G17460	-0.805146	4.69282	26.5213	2.61e-07	7.65e-06
AT4G37850	-0.805319	3.23164	14.2929	0.000156586	0.00229085
AT5G40510	-0.805825	4.82182	27.6972	1.42e-07	4.42e-06
AT5G63970	-0.806	4.36167	23.323	1.37e-06	3.5e-05
AT3G18060	-0.806047	6.98157	31.3786	2.13e-08	7.65e-07
AT1G73220	-0.806596	3.81783	18.6024	1.61e-05	0.000316332
AT1G75140	-0.807883	3.59559	16.8733	4e-05	0.000704625
AT4G20460	-0.808039	4.46273	24.4507	7.64e-07	2.06e-05
AT4G21390	-0.809012	3.226	14.4132	0.000146902	0.0021709
AT2G44380	-0.810304	3.43371	15.8521	6.86e-05	0.00112448
AT4G39670	-0.810409	2.36989	9.56823	0.00198055	0.0193553
AT5G08370	-0.810665	2.89942	12.3981	0.000430067	0.00542307
AT1G17020	-0.810785	4.79497	27.8549	1.31e-07	4.1e-06
AT1G55440	-0.811258	2.36995	9.6057	0.00194054	0.0190544
AT2G30860	-0.811276	9.04662	32.1368	1.44e-08	5.34e-07
AT2G20440	-0.812147	3.44894	16.0325	6.23e-05	0.00104071
AT1G01610	-0.812723	6.06574	31.3938	2.11e-08	7.6e-07
AT4G03610	-0.813275	3.29386	15.0162	0.000106692	0.00165607
AT5G14120	-0.813726	5.50844	31.034	2.55e-08	9.09e-07
AT3G27390	-0.814153	6.06626	31.495	2.01e-08	7.27e-07
AT4G25770	-0.817096	4.63085	26.6789	2.41e-07	7.12e-06
AT3G09710	-0.817322	3.79052	18.8919	1.39e-05	0.000277956
AT5G44670	-0.817873	5.5954	31.4486	2.06e-08	7.44e-07
AT3G21620	-0.818412	1.90901	7.7345	0.00541905	0.0432046
AT5G53370	-0.818424	6.22153	31.8738	1.65e-08	6.07e-07
AT1G29300	-0.818557	3.50723	16.6643	4.47e-05	0.000776485
AT1G21670	-0.820337	4.21031	22.6185	1.98e-06	4.92e-05
AT3G19400	-0.820381	5.02146	29.6783	5.12e-08	1.74e-06
AT4G35320	-0.820789	5.40733	31.4253	2.08e-08	7.5e-07
AT4G20170	-0.822304	5.14075	30.4117	3.51e-08	1.22e-06
AT2G21490	-0.822332	4.02258	21.0825	4.41e-06	0.000100207
AT4G25940	-0.82282	2.16141	8.91537	0.00282882	0.0258322
AT3G58060	-0.822838	2.10962	8.69404	0.00319362	0.0284824
AT2G34560	-0.824005	6.29068	32.3105	1.32e-08	4.93e-07
AT5G25120	-0.824029	1.83591	7.51622	0.00611619	0.0472655
AT1G27461	-0.824311	2.43979	10.2778	0.00134705	0.0140147
AT2G23690	-0.824369	2.8968	12.7927	0.000348211	0.00454256
AT1G61667	-0.82514	4.13489	22.1514	2.52e-06	6.08e-05
AT2G38170	-0.825574	6.83469	32.7324	1.06e-08	4.03e-07
AT5G06330	-0.82603	2.66904	11.5613	0.000673774	0.00788102
AT1G16060	-0.826847	2.77107	12.1534	0.000490297	0.00605528
AT4G37010	-0.82786	5.69709	32.2655	1.35e-08	5.03e-07
AT2G36420	-0.828397	4.7136	28.2659	1.06e-07	3.4e-06
AT1G76890	-0.828451	2.5868	11.1937	0.000821186	0.00931351
AT5G49640	-0.828813	3.75119	19.0408	1.28e-05	0.000259571
AT4G00330	-0.829005	5.60081	32.2762	1.34e-08	5e-07
AT5G02410	-0.829603	3.85872	20.0341	7.62e-06	0.000163623
AT5G36180	-0.82989	5.8923	32.6067	1.13e-08	4.27e-07
AT1G06850	-0.830021	4.82029	29.3096	6.19e-08	2.07e-06
AT2G07000	-0.830607	2.20732	9.26732	0.00233369	0.0220291
AT5G67230	-0.830669	3.79361	19.5234	9.95e-06	0.000207483
AT3G45080	-0.830777	6.40925	32.85	1e-08	3.8e-07
AT3G52360	-0.830994	5.14959	31.0397	2.54e-08	9.07e-07
AT1G15330	-0.831321	3.81947	19.7651	8.77e-06	0.000185376
AT4G33740	-0.832106	7.3082	33.6904	6.49e-09	2.55e-07
AT5G41080	-0.832895	5.56534	32.544	1.17e-08	4.4e-07
AT2G34655	-0.83294	3.47233	16.9833	3.78e-05	0.000670254
AT2G30010	-0.833329	4.36325	24.9155	6e-07	1.65e-05
AT2G18860	-0.833342	3.6583	18.4773	1.72e-05	0.000334464
AT3G52820	-0.834119	2.00615	8.44272	0.00366627	0.0318359
AT4G32070	-0.835201	5.92031	33.0554	9e-09	3.45e-07
AT1G19230	-0.83573	4.33079	24.737	6.59e-07	1.8e-05
AT1G04980	-0.837598	4.20273	23.5019	1.25e-06	3.23e-05
AT2G41180	-0.837716	3.10779	14.5622	0.000135731	0.00203173
AT1G28570	-0.838252	2.21592	9.50049	0.002055	0.0199025
AT5G62130	-0.838687	3.22104	15.4227	8.6e-05	0.00137807
AT5G44460	-0.838692	4.48578	26.555	2.57e-07	7.53e-06
AT1G12064	-0.839507	2.02837	8.65156	0.00326893	0.0290001
AT1G04240	-0.839688	7.25783	34.2567	4.85e-09	1.94e-07
AT2G46330	-0.83987	7.07543	34.1088	5.24e-09	2.08e-07
AT3G20460	-0.840179	2.92906	13.4883	0.000240241	0.00332098
AT5G11000	-0.840462	6.60996	33.5986	6.8e-09	2.66e-07
AT1G61080	-0.840564	2.16085	9.30435	0.00228699	0.0216873
AT5G04530	-0.840827	6.30144	33.6317	6.69e-09	2.61e-07
AT4G28440	-0.841186	4.88334	30.4126	3.51e-08	1.22e-06
AT2G03090	-0.841419	2.73714	12.398	0.000430069	0.00542307
AT3G17440	-0.841826	5.97493	33.575	6.89e-09	2.68e-07
AT1G60190	-0.842627	3.4073	16.8951	3.95e-05	0.000698405
AT3G59140	-0.843009	2.52784	11.2386	0.000801572	0.00914352
AT3G05900	-0.843351	3.57637	18.1865	2.01e-05	0.00038274
AT1G13420	-0.843729	5.75518	33.5789	6.87e-09	2.68e-07
AT5G01050	-0.843853	3.15237	15.1113	0.000101451	0.00159041
AT2G19660	-0.844254	5.12153	31.9062	1.62e-08	5.99e-07
AT5G23820	-0.844418	8.33372	34.9549	3.39e-09	1.39e-07
AT2G35650	-0.844632	4.14596	23.3453	1.36e-06	3.46e-05
AT5G66620	-0.845337	2.16009	9.39323	0.00217875	0.0208839
AT4G09030	-0.846033	4.59589	28.1875	1.1e-07	3.51e-06
AT3G03500	-0.846275	3.00469	14.1239	0.000171303	0.00247066
AT1G54740	-0.846383	3.0563	14.4936	0.000140763	0.00209307
AT2G26410	-0.847207	1.8391	7.94878	0.00481339	0.0394522
AT2G29995	-0.847406	2.66378	12.1312	0.000496165	0.00611204
AT4G33120	-0.847457	6.0418	34.0535	5.39e-09	2.14e-07
AT2G03760	-0.847895	5.38591	33.4652	7.29e-09	2.83e-07
AT5G35735	-0.848001	2.9958	14.135	0.00017029	0.00245816
AT1G19835	-0.848062	6.86285	34.5528	4.17e-09	1.68e-07
AT5G26010	-0.84819	5.25143	32.8616	9.94e-09	3.78e-07
AT3G18830	-0.848333	5.79184	33.9647	5.64e-09	2.23e-07
AT1G21100	-0.849722	3.07112	14.7072	0.000125679	0.00190933
AT4G03010	-0.849947	2.51447	11.324	0.000765551	0.00880062
AT4G33330	-0.849968	2.63068	12.0039	0.000531225	0.00647509
AT2G17550	-0.850004	4.95366	31.4419	2.06e-08	7.45e-07
AT3G10520	-0.850457	3.88831	21.2721	3.99e-06	9.2e-05
AT3G13000	-0.850923	3.23215	15.9375	6.55e-05	0.00108174
AT3G06770	-0.850934	5.92248	34.2784	4.8e-09	1.92e-07
AT1G64200	-0.851449	5.24945	33.0752	8.9e-09	3.42e-07
AT5G23870	-0.851474	5.11794	32.4102	1.25e-08	4.69e-07
AT3G28910	-0.851688	6.02237	34.3908	4.53e-09	1.83e-07
AT3G44326	-0.852185	3.62141	18.9816	1.32e-05	0.000266775
AT5G20550	-0.852486	4.68998	29.6351	5.23e-08	1.77e-06
AT2G22430	-0.852547	6.63723	34.5996	4.07e-09	1.65e-07
AT1G70810	-0.85329	1.97655	8.68603	0.00320769	0.02857
AT5G09480	-0.853484	2.76005	12.8776	0.000332779	0.00436837
AT3G59350	-0.853531	6.35787	34.6427	3.98e-09	1.62e-07
AT3G47560	-0.853979	1.74187	7.63367	0.00573043	0.0449303
AT5G63130	-0.854032	2.01376	8.88003	0.0028841	0.0262514
AT4G15233	-0.854598	4.11059	23.5441	1.22e-06	3.18e-05
AT3G16410	-0.854909	8.76326	35.7295	2.28e-09	9.61e-08
AT5G05410	-0.855123	2.37245	10.6469	0.00110308	0.0119002
AT5G41680	-0.856129	2.62066	12.1339	0.000495451	0.00610547
AT4G33730	-0.856195	3.95851	22.2132	2.44e-06	5.91e-05
AT2G15440	-0.856212	2.6177	12.1156	0.000500335	0.00615438
AT2G43290	-0.856327	6.2123	34.824	3.63e-09	1.48e-07
AT3G07490	-0.856849	2.67824	12.4862	0.000410246	0.00523399
AT3G61750	-0.856916	2.56077	11.7954	0.00059412	0.00712796
AT2G21050	-0.857017	3.0834	15.0682	0.000103796	0.00161784
AT4G13620	-0.85871	4.76634	30.879	2.76e-08	9.79e-07
AT1G03220	-0.858765	7.21978	35.7753	2.23e-09	9.4e-08
AT5G18270	-0.858903	3.85186	21.3598	3.81e-06	8.83e-05
AT1G69790	-0.859235	2.81243	13.3447	0.000259345	0.00353704
AT3G16180	-0.859266	5.89406	34.9159	3.46e-09	1.42e-07
AT1G13210	-0.859343	5.80351	34.8573	3.56e-09	1.46e-07
AT1G03410	-0.859574	3.54529	18.6458	1.58e-05	0.00031017
AT4G38840	-0.860362	1.81094	8.0615	0.00452293	0.037557
AT5G41790	-0.86053	6.32327	35.2071	2.98e-09	1.23e-07
AT3G20130	-0.86075	4.93712	32.1348	1.44e-08	5.34e-07
AT1G51500	-0.861896	7.62043	36.3043	1.7e-09	7.24e-08
AT3G25790	-0.862613	2.8966	13.9812	0.0001848	0.00263927
AT1G15100	-0.863166	4.76326	31.2227	2.31e-08	8.27e-07
AT4G21830	-0.864441	6.75894	35.7141	2.3e-09	9.67e-08
AT1G73640	-0.86448	4.05636	23.5282	1.23e-06	3.2e-05
AT3G02880	-0.864645	6.20273	35.5045	2.56e-09	1.07e-07
AT3G47295	-0.865219	2.76803	13.2455	0.000273434	0.00369917
AT5G07580	-0.865227	4.34488	26.5696	2.55e-07	7.49e-06
AT2G19130	-0.865419	2.82048	13.594	0.000227091	0.00316393
AT3G16240	-0.865449	10.8524	35.266	2.89e-09	1.2e-07
AT3G18170	-0.865969	4.72597	30.9692	2.63e-08	9.39e-07
AT2G04680	-0.867452	3.2169	16.4398	5.03e-05	0.000864646
AT1G62990	-0.867796	4.40939	27.5037	1.57e-07	4.82e-06
AT3G46540	-0.868066	4.02846	23.473	1.27e-06	3.26e-05
AT4G13290	-0.868184	3.8434	21.7564	3.1e-06	7.28e-05
AT1G74100	-0.868745	6.4511	35.8694	2.12e-09	8.96e-08
AT4G04460	-0.868824	3.49552	18.6388	1.58e-05	0.000311073
AT5G03140	-0.86891	3.39084	17.825	2.42e-05	0.000453232
AT3G49220	-0.869005	8.26577	36.9976	1.19e-09	5.16e-08
AT4G09600	-0.869074	3.43863	18.2245	1.97e-05	0.000376115
AT3G50780	-0.869363	3.92779	22.6116	1.99e-06	4.93e-05
AT1G30360	-0.87049	7.45758	36.9272	1.23e-09	5.35e-08
AT3G28130	-0.870727	2.15151	9.89902	0.00165439	0.0166854
AT1G63220	-0.871005	6.93076	36.4879	1.54e-09	6.6e-08
AT5G07322	-0.871166	4.67113	30.6836	3.05e-08	1.07e-06
AT3G50760	-0.871665	1.96647	9.01335	0.00268112	0.0247863
AT2G48030	-0.872295	4.42125	27.9147	1.27e-07	3.99e-06
AT1G79520	-0.872622	3.63632	19.9853	7.82e-06	0.000167104
AT1G48745	-0.872746	2.17614	10.069	0.00150849	0.0153894
AT3G44735	-0.872881	4.35302	27.1657	1.87e-07	5.64e-06
AT1G79840	-0.873396	3.55804	19.3415	1.09e-05	0.000225698
AT2G28350	-0.873422	4.9597	33.204	8.33e-09	3.21e-07
AT1G27420	-0.873681	1.94848	8.97242	0.00274186	0.0251749
AT4G12545	-0.873778	7.34684	37.1213	1.12e-09	4.86e-08
AT5G01300	-0.875642	2.92205	14.5423	0.000137169	0.00204961
AT3G04640	-0.875753	1.81852	8.38536	0.00378377	0.0326465
AT5G16360	-0.876477	4.99886	33.6374	6.67e-09	2.61e-07
AT3G27170	-0.876507	4.21434	25.7965	3.8e-07	1.08e-05
AT1G36940	-0.876553	3.15962	16.3104	5.38e-05	0.00091775
AT5G10120	-0.876618	3.02248	15.2706	9.32e-05	0.00147673
AT1G67900	-0.876873	3.51451	19.1273	1.22e-05	0.000249273
AT5G48230	-0.877439	7.12703	37.2332	1.05e-09	4.61e-08
AT4G25810	-0.877454	3.13275	16.1731	5.79e-05	0.000977055
AT5G06390	-0.877854	6.95825	37.0957	1.13e-09	4.92e-08
AT1G52750	-0.879806	6.49381	36.7678	1.34e-09	5.77e-08
AT2G36380	-0.880109	7.72419	37.8839	7.55e-10	3.35e-08
AT1G06410	-0.88034	7.10264	37.4632	9.37e-10	4.11e-08
AT3G51450	-0.880405	3.24103	17.0953	3.56e-05	0.0006359
AT3G14060	-0.880829	2.43567	11.6616	0.000638426	0.00753576
AT1G61900	-0.88106	5.69149	36.4741	1.56e-09	6.64e-08
AT3G12320	-0.882262	1.89616	8.8705	0.0028992	0.0263603
AT1G10480	-0.882442	3.11692	16.1821	5.76e-05	0.000973623
AT2G36500	-0.882658	3.39256	18.409	1.78e-05	0.000345272
AT1G70550	-0.882858	2.91198	14.7258	0.000124449	0.00189664
AT1G07645	-0.883358	1.84647	8.65536	0.00326211	0.0289702
AT2G29380	-0.883516	1.77327	8.32103	0.00392012	0.0335975
AT3G11410	-0.883786	5.64493	36.6519	1.42e-09	6.12e-08
AT3G13750	-0.883948	7.64061	38.166	6.53e-10	2.93e-08
AT1G16500	-0.884379	1.8289	8.58704	0.00338678	0.0298486
AT4G26740	-0.884868	2.29298	10.9589	0.000932044	0.0103576
AT1G60270	-0.885579	1.63556	7.76365	0.00533231	0.0426954
AT1G64330	-0.885656	6.08651	37.1892	1.08e-09	4.7e-08
AT5G20490	-0.886175	7.00045	37.8481	7.69e-10	3.41e-08
AT1G18940	-0.886987	2.34428	11.2703	0.000788021	0.00900729
AT5G58500	-0.886998	1.94082	9.19633	0.00242593	0.0227847
AT4G11050	-0.887675	2.41523	11.736	0.000613394	0.00730184
AT4G10770	-0.88768	4.09598	25.2211	5.13e-07	1.43e-05
AT1G70210	-0.888354	4.4297	29.0416	7.11e-08	2.34e-06
AT5G22355	-0.888754	4.75494	32.9294	9.6e-09	3.67e-07
AT3G44798	-0.890377	2.7848	14.1163	0.000171992	0.00247847
AT5G23840	-0.891245	6.17837	37.6555	8.49e-10	3.74e-08
AT1G62370	-0.892362	4.26295	27.2905	1.76e-07	5.31e-06
AT5G24290	-0.892697	5.24337	36.2646	1.73e-09	7.37e-08
AT3G13650	-0.892882	5.64682	37.4008	9.67e-10	4.24e-08
AT1G75220	-0.893256	6.81583	38.1985	6.43e-10	2.89e-08
AT1G58440	-0.893585	5.74185	37.5612	8.91e-10	3.91e-08
AT5G03520	-0.895643	6.58853	38.0622	6.89e-10	3.08e-08
AT5G54380	-0.895764	6.58121	38.0852	6.81e-10	3.05e-08
AT5G49900	-0.896197	4.99428	35.1179	3.12e-09	1.29e-07
AT5G23580	-0.896309	3.68134	21.5212	3.51e-06	8.15e-05
AT1G61050	-0.896955	3.03268	16.0579	6.15e-05	0.00103027
AT2G21100	-0.897001	3.29501	18.1804	2.01e-05	0.000383534
AT4G15370	-0.897395	5.63355	37.7999	7.88e-10	3.49e-08
AT2G16760	-0.898233	3.02495	16.0395	6.21e-05	0.00103856
AT5G46910	-0.898874	4.74837	33.5879	6.84e-09	2.67e-07
AT3G58450	-0.899236	3.31619	18.4405	1.76e-05	0.000340198
AT1G72120	-0.899387	2.8993	15.1404	9.99e-05	0.00156876
AT2G43510	-0.899745	1.59438	7.83617	0.00512256	0.0413409
AT3G47620	-0.900002	4.72618	33.3997	7.54e-09	2.92e-07
AT4G29905	-0.900714	5.68395	38.0685	6.87e-10	3.07e-08
AT1G64640	-0.90144	7.82229	39.7421	2.92e-10	1.38e-08
AT3G18040	-0.901564	5.38689	37.7416	8.12e-10	3.59e-08
AT3G27884	-0.902097	3.73376	22.2854	2.35e-06	5.7e-05
AT3G54940	-0.902838	4.64864	32.6414	1.11e-08	4.2e-07
AT1G70330	-0.903769	5.92944	38.5694	5.31e-10	2.42e-08
AT1G78070	-0.904668	4.74192	33.9575	5.66e-09	2.24e-07
AT5G47530	-0.904669	4.27588	28.2031	1.1e-07	3.48e-06
AT3G45070	-0.90631	2.98122	15.9563	6.49e-05	0.00107421
AT2G44910	-0.906411	2.73046	14.2615	0.000159219	0.00232128
AT4G33625	-0.906736	6.16467	38.9473	4.38e-10	2.01e-08
AT3G45780	-0.907929	9.24849	40.027	2.52e-10	1.2e-08
AT4G25090	-0.909328	4.94733	35.892	2.1e-09	8.87e-08
AT4G25390	-0.90962	2.71634	14.2724	0.000158301	0.0023109
AT5G09978	-0.910763	3.222	18.0923	2.11e-05	0.00040086
AT1G61840	-0.911326	3.23171	18.2236	1.97e-05	0.000376115
AT4G24310	-0.911392	2.79713	14.8769	0.000114865	0.00177718
AT1G22550	-0.911577	5.25067	37.8119	7.83e-10	3.47e-08
AT1G31750	-0.912695	2.78825	14.8556	0.000116171	0.00179161
AT5G44340	-0.912704	9.97967	40.0325	2.51e-10	1.2e-08
AT1G14240	-0.914805	5.98684	39.5593	3.2e-10	1.5e-08
AT4G02100	-0.914873	5.22183	37.9123	7.44e-10	3.31e-08
AT2G24860	-0.915275	3.68813	22.4531	2.16e-06	5.29e-05
AT3G05150	-0.91687	5.93419	39.6591	3.04e-10	1.43e-08
AT4G30660	-0.917461	3.56203	21.2898	3.96e-06	9.12e-05
AT2G38790	-0.918917	2.92423	16.0023	6.33e-05	0.0010539
AT1G10020	-0.919619	4.34456	29.9812	4.38e-08	1.5e-06
AT5G59010	-0.920036	6.50218	40.128	2.39e-10	1.15e-08
AT1G07720	-0.920386	6.73416	40.3759	2.11e-10	1.03e-08
AT5G24380	-0.920854	2.36661	12.2589	0.000463355	0.00577561
AT1G71692	-0.92202	2.61943	14	0.000182964	0.00262085
AT1G73190	-0.922114	4.35294	30.2216	3.87e-08	1.34e-06
AT1G79330	-0.922352	1.97487	10.1058	0.0014787	0.0151258
AT4G29180	-0.923818	4.51115	32.4209	1.25e-08	4.68e-07
AT1G35580	-0.92467	7.21757	41.3669	1.27e-10	6.28e-09
AT4G00400	-0.92501	5.50152	39.8754	2.72e-10	1.29e-08
AT5G65890	-0.926915	1.50177	7.89283	0.00496456	0.0403176
AT2G38465	-0.927033	1.5003	7.89409	0.00496109	0.0402991
AT1G24100	-0.927804	4.73956	35.6172	2.41e-09	1.01e-07
AT1G72230	-0.928227	5.49274	40.1231	2.4e-10	1.15e-08
AT1G74950	-0.928444	4.36024	30.7224	2.99e-08	1.05e-06
AT4G28250	-0.928509	1.71158	8.85511	0.00292373	0.0265474
AT5G63600	-0.929476	6.22631	40.9151	1.6e-10	7.85e-09
AT1G05570	-0.931628	7.51774	42.2395	8.13e-11	4.15e-09
AT2G32800	-0.931764	4.79529	36.5357	1.51e-09	6.46e-08
AT1G72510	-0.932889	5.28017	39.7335	2.93e-10	1.38e-08
AT1G74020	-0.933204	6.92879	41.7715	1.03e-10	5.21e-09
AT1G64670	-0.933852	5.92564	41.1214	1.44e-10	7.09e-09
AT4G12980	-0.933969	2.84971	15.9636	6.46e-05	0.00107165
AT5G20270	-0.934987	6.6101	41.4312	1.23e-10	6.1e-09
AT2G06925	-0.935031	4.0778	27.6361	1.47e-07	4.55e-06
AT4G22270	-0.937006	1.93908	10.2389	0.00137575	0.0142604
AT5G64620	-0.937281	4.59136	34.3632	4.59e-09	1.85e-07
AT1G63380	-0.938391	2.42499	13.1139	0.000293327	0.0039225
AT2G16280	-0.938687	5.85847	41.4801	1.2e-10	5.96e-09
AT5G61590	-0.938998	3.39124	20.7301	5.3e-06	0.000118044
AT2G35710	-0.939377	3.79265	24.78	6.44e-07	1.76e-05
AT1G12090	-0.939423	10.0539	42.3184	7.81e-11	3.99e-09
AT4G30400	-0.939569	4.47061	32.9149	9.67e-09	3.68e-07
AT5G19970	-0.939998	3.30243	19.9678	7.89e-06	0.000168529
AT4G00700	-0.941188	4.80578	37.3588	9.88e-10	4.32e-08
AT5G45920	-0.942063	2.42484	13.2167	0.000277666	0.00374888
AT5G25610	-0.943688	8.25145	43.5114	4.25e-11	2.24e-09
AT5G67620	-0.945094	3.09433	18.3391	1.85e-05	0.000356308
AT1G13110	-0.945146	5.39768	41.4005	1.25e-10	6.19e-09
AT1G78700	-0.946588	4.61644	35.3684	2.74e-09	1.14e-07
AT4G15350	-0.946651	2.20847	12.0032	0.000531437	0.00647533
AT1G27950	-0.946928	8.5005	43.7616	3.74e-11	1.99e-09
AT4G19810	-0.947302	4.95312	38.7994	4.72e-10	2.16e-08
AT5G15190	-0.948112	1.77517	9.53555	0.00201612	0.0196552
AT3G15950	-0.948753	9.25507	43.6389	3.98e-11	2.11e-09
AT3G16210	-0.948901	2.28221	12.4821	0.000411141	0.00523943
AT3G52790	-0.94923	2.8259	16.2903	5.44e-05	0.000926149
AT1G55152	-0.949453	3.29541	20.2916	6.66e-06	0.000144589
AT2G31860	-0.949499	1.73914	9.38965	0.00218301	0.0209182
AT2G48060	-0.950403	5.44338	41.962	9.37e-11	4.76e-09
AT5G56320	-0.950443	2.65138	15.0686	0.000103773	0.00161784
AT1G14290	-0.950893	5.33809	41.5705	1.14e-10	5.73e-09
AT2G14890	-0.951509	8.59645	44.1605	3.05e-11	1.65e-09
AT3G58710	-0.951636	4.32044	31.6904	1.82e-08	6.62e-07
AT5G50915	-0.952167	3.83072	25.8631	3.67e-07	1.05e-05
AT4G11393	-0.953244	1.51689	8.38936	0.00377545	0.032607
AT2G40475	-0.953987	4.20462	30.2849	3.74e-08	1.3e-06
AT5G11230	-0.95413	4.65872	36.507	1.53e-09	6.55e-08
AT5G67210	-0.95469	3.14141	19.1194	1.23e-05	0.00025016
AT3G01220	-0.95475	5.34161	41.9359	9.5e-11	4.81e-09
AT5G19770	-0.954906	9.64358	43.9699	3.36e-11	1.81e-09
AT4G25260	-0.955583	7.84415	44.564	2.48e-11	1.36e-09
AT5G59590	-0.955704	4.10013	29.1235	6.81e-08	2.26e-06
AT5G58550	-0.95581	4.77438	38.246	6.27e-10	2.83e-08
AT3G45960	-0.955917	4.98665	39.7485	2.91e-10	1.38e-08
AT5G54240	-0.957232	2.57187	14.7012	0.000126083	0.00191287
AT2G44010	-0.958422	2.11678	11.7149	0.000620393	0.00736689
AT2G22470	-0.959761	7.31277	44.5985	2.44e-11	1.33e-09
AT3G55290	-0.959964	4.79143	38.6846	5.01e-10	2.29e-08
AT2G27920	-0.961266	4.81977	39.0211	4.22e-10	1.94e-08
AT1G56630	-0.961771	3.14282	19.4084	1.06e-05	0.000218997
AT3G44042	-0.961844	3.44336	22.2001	2.46e-06	5.94e-05
AT5G54030	-0.96201	2.73424	16.0322	6.23e-05	0.00104071
AT2G31865	-0.962384	2.15105	12.0252	0.00052518	0.00641071
AT1G55850	-0.963187	5.60875	43.3321	4.65e-11	2.44e-09
AT3G24090	-0.963672	2.69331	15.8032	7.04e-05	0.00114941
AT4G17170	-0.964031	7.5517	45.1852	1.81e-11	1.01e-09
AT1G68530	-0.964068	9.16114	45.0765	1.91e-11	1.06e-09
AT5G45670	-0.96459	7.22198	44.9513	2.04e-11	1.13e-09
AT3G14440	-0.964778	3.78579	26.0435	3.35e-07	9.61e-06
AT3G05155	-0.965481	3.67966	24.8999	6.05e-07	1.66e-05
AT3G16690	-0.965572	3.88693	27.2414	1.8e-07	5.44e-06
AT4G20160	-0.965958	1.40116	8.08978	0.00445289	0.0371129
AT3G22570	-0.966162	5.38443	43.129	5.16e-11	2.69e-09
AT5G48110	-0.967438	7.90244	45.6779	1.41e-11	7.94e-10
AT1G70750	-0.967594	3.81382	26.5392	2.59e-07	7.59e-06
AT5G14750	-0.968812	3.21977	20.3958	6.31e-06	0.000138265
AT1G25425	-0.971312	2.769	16.5967	4.63e-05	0.000803004
AT2G22790	-0.972339	2.04768	11.64	0.000645879	0.00760503
AT1G22360	-0.972782	7.3096	45.7922	1.33e-11	7.53e-10
AT2G34355	-0.972813	3.87324	27.4768	1.59e-07	4.87e-06
AT2G20080	-0.972911	3.70013	25.435	4.59e-07	1.29e-05
AT1G23070	-0.973044	1.31041	7.77438	0.00530074	0.042483
AT5G40690	-0.973297	5.2162	42.7263	6.34e-11	3.28e-09
AT3G61550	-0.973407	4.28993	32.6623	1.1e-08	4.16e-07
AT1G22640	-0.973669	5.4491	43.9568	3.38e-11	1.81e-09
AT5G37300	-0.9749	3.71413	25.7003	4e-07	1.14e-05
AT2G01150	-0.975773	3.78813	26.613	2.49e-07	7.35e-06
AT1G17060	-0.975942	5.65503	44.4883	2.58e-11	1.41e-09
AT1G34040	-0.977396	1.94944	11.1542	0.000838891	0.0094887
AT2G23760	-0.977884	3.23259	20.8813	4.89e-06	0.000110178
AT1G01180	-0.978703	3.863	27.669	1.44e-07	4.48e-06
AT1G28130	-0.978747	6.78231	45.6298	1.44e-11	8.12e-10
AT3G19580	-0.978833	3.95978	28.8328	7.92e-08	2.59e-06
AT4G12690	-0.979132	4.2889	33.0249	9.14e-09	3.5e-07
AT2G39420	-0.979359	5.44663	44.4557	2.62e-11	1.43e-09
AT1G04490	-0.981284	2.05166	11.8602	0.000573829	0.00692655
AT1G13080	-0.981349	5.54153	44.8275	2.17e-11	1.2e-09
AT1G22650	-0.981602	2.24307	13.0674	0.000300701	0.00400994
AT4G09500	-0.981654	1.86115	10.7154	0.001063	0.0115307
AT2G41190	-0.98237	5.39963	44.6503	2.37e-11	1.31e-09
AT5G47450	-0.983119	8.38063	47.1236	6.72e-12	3.98e-10
AT1G45145	-0.983772	6.72538	45.9729	1.21e-11	6.92e-10
AT2G28950	-0.984458	4.92596	41.6511	1.1e-10	5.52e-09
AT2G14750	-0.984669	5.18894	43.5345	4.2e-11	2.21e-09
AT5G35525	-0.985045	4.72645	39.7417	2.92e-10	1.38e-08
AT5G15290	-0.985744	6.5094	45.9163	1.24e-11	7.11e-10
AT2G19900	-0.986	5.23089	43.9494	3.4e-11	1.82e-09
AT5G64900	-0.987347	1.64852	9.63551	0.0019093	0.0188048
AT4G36520	-0.987382	5.2265	44.0805	3.18e-11	1.71e-09
AT5G45690	-0.987529	3.50698	23.9927	9.69e-07	2.56e-05
AT2G28120	-0.989095	2.39103	14.265	0.00015893	0.00231807
AT4G13790	-0.989576	3.02751	19.3585	1.09e-05	0.000223969
AT1G04560	-0.989681	4.77167	40.8227	1.68e-10	8.22e-09
AT5G28020	-0.990174	5.53489	45.5644	1.49e-11	8.38e-10
AT3G16800	-0.99035	4.1242	31.5262	1.98e-08	7.17e-07
AT2G17220	-0.990959	3.06554	19.7831	8.69e-06	0.0001841
AT4G30180	-0.991504	3.94464	29.3653	6.01e-08	2.01e-06
AT1G78210	-0.99203	4.79768	41.2925	1.32e-10	6.5e-09
AT2G43570	-0.992514	2.15427	12.7672	0.000352992	0.004596
N_noFeature	-0.994034	15.4756	40.2323	2.27e-10	1.1e-08
AT2G35300	-0.995925	5.23971	44.8282	2.17e-11	1.2e-09
AT1G09575	-0.996196	3.11394	20.4813	6.03e-06	0.000132944
AT4G21620	-0.996599	6.07456	46.8019	7.92e-12	4.65e-10
AT1G68440	-0.997171	6.29686	46.9626	7.3e-12	4.3e-10
AT1G47480	-0.99719	5.3297	45.5541	1.5e-11	8.41e-10
AT4G14500	-0.997715	5.7126	46.5435	9.04e-12	5.24e-10
AT5G44130	-0.998276	7.25842	48.1033	4.08e-12	2.47e-10
AT2G47485	-0.998389	4.44055	36.5924	1.46e-09	6.29e-08
AT5G04330	-0.998842	3.80996	28.1262	1.14e-07	3.61e-06
AT3G57780	-0.999116	4.56471	38.5242	5.44e-10	2.47e-08
AT1G05230	-0.999374	3.74811	27.4009	1.66e-07	5.05e-06
AT3G16420	-0.999434	11.5169	45.8869	1.26e-11	7.21e-10
AT4G22640	-1.00032	1.29702	8.13538	0.00434229	0.0363806
AT5G47550	-1.00058	5.07605	44.0489	3.23e-11	1.74e-09
AT1G71020	-1.00191	4.98243	43.5573	4.15e-11	2.19e-09
AT2G46680	-1.00319	4.82441	42.4294	7.38e-11	3.79e-09
AT5G26340	-1.00334	6.83029	47.9729	4.36e-12	2.64e-10
AT5G45210	-1.00354	3.12322	20.8463	4.99e-06	0.000112059
AT1G61170	-1.00435	2.91687	18.9022	1.38e-05	0.000276781
AT3G52748	-1.00459	2.07191	12.5105	0.000404944	0.00517616
AT4G01975	-1.00489	1.95683	11.8308	0.000582939	0.00701887
AT2G23640	-1.00541	1.19354	7.72723	0.00544092	0.0433172
AT5G57670	-1.00549	2.92159	19.0071	1.3e-05	0.000263714
AT4G17550	-1.00588	4.17263	33.1339	8.64e-09	3.32e-07
AT4G14290	-1.0078	3.72891	27.6123	1.49e-07	4.6e-06
AT5G23210	-1.00834	7.00614	48.7356	2.96e-12	1.83e-10
AT1G74080	-1.00862	2.13053	13.0176	0.000308794	0.00410322
AT5G24130	-1.00892	2.37225	14.6771	0.000127706	0.00193275
AT4G14380	-1.009	3.97289	30.7416	2.96e-08	1.04e-06
AT4G03070	-1.0125	4.89927	43.7709	3.72e-11	1.98e-09
AT5G01610	-1.01359	3.71204	27.7013	1.42e-07	4.41e-06
AT1G07985	-1.01439	4.07281	32.3326	1.3e-08	4.88e-07
AT3G07460	-1.01474	7.29794	49.7121	1.8e-12	1.14e-10
N_multimapping	-1.01558	17.513	39.5903	3.15e-10	1.48e-08
AT3G16470	-1.01581	7.8423	50.2328	1.38e-12	8.88e-11
AT5G07110	-1.01637	5.24325	46.6372	8.61e-12	5.01e-10
AT5G42785	-1.01643	3.28638	23.0971	1.54e-06	3.92e-05
AT3G22600	-1.01685	7.80571	50.3242	1.32e-12	8.52e-11
AT5G11110	-1.01772	5.51204	48.0862	4.12e-12	2.49e-10
AT5G05840	-1.01926	2.1091	13.1558	0.000286844	0.00385267
AT2G21540	-1.01951	7.37914	50.2656	1.36e-12	8.76e-11
AT1G32410	-1.01976	5.29458	47.3144	6.1e-12	3.63e-10
AT1G11350	-1.02038	2.49119	15.9603	6.48e-05	0.00107268
AT2G20610	-1.0207	5.97117	48.9517	2.65e-12	1.65e-10
AT1G80120	-1.02182	2.88291	19.2591	1.14e-05	0.000234639
AT3G56480	-1.02251	5.03495	45.7048	1.39e-11	7.85e-10
AT4G27890	-1.02287	2.48412	16.0016	6.34e-05	0.0010539
AT1G24440	-1.02394	4.80293	43.9588	3.38e-11	1.81e-09
AT3G22620	-1.02528	7.21886	50.6372	1.12e-12	7.32e-11
AT1G70900	-1.02535	4.18912	34.5628	4.15e-09	1.68e-07
AT5G26290	-1.02731	3.13208	21.9274	2.84e-06	6.75e-05
AT1G16150	-1.02788	1.13978	7.79462	0.00524168	0.0420919
AT5G64570	-1.02794	6.61123	49.8686	1.66e-12	1.06e-10
AT5G07130	-1.03006	2.15983	13.7837	0.000205273	0.00288627
AT4G29800	-1.03007	3.68961	28.3134	1.04e-07	3.32e-06
AT4G15290	-1.03047	4.26058	36.1011	1.88e-09	7.99e-08
AT3G09520	-1.03064	2.97091	20.3238	6.55e-06	0.00014254
AT3G09240	-1.0312	2.28258	14.6586	0.000128961	0.00194863
AT1G02700	-1.03199	1.70255	10.8017	0.00101456	0.0110804
AT5G04970	-1.03256	3.04878	21.2584	4.02e-06	9.25e-05
AT3G10320	-1.03303	3.25594	23.4898	1.26e-06	3.24e-05
AT1G28170	-1.03387	1.20777	8.22419	0.00413486	0.0350182
AT3G32899	-1.03421	2.07638	13.2612	0.000271153	0.0036772
AT3G50630	-1.03507	4.656	42.699	6.43e-11	3.32e-09
AT2G25450	-1.03535	1.56002	10.0769	0.00150209	0.0153382
AT4G14550	-1.03572	4.36431	38.0394	6.97e-10	3.11e-08
AT5G18860	-1.03654	5.24888	48.552	3.25e-12	1.99e-10
AT3G61380	-1.03664	2.93606	20.3052	6.61e-06	0.000143748
AT5G56870	-1.03692	9.07756	52.0448	5.48e-13	3.71e-11
AT2G23400	-1.03814	1.48189	9.70706	0.00183639	0.0182148
AT3G53040	-1.03873	3.72397	29.2075	6.52e-08	2.17e-06
AT1G62710	-1.03939	5.43746	49.9193	1.62e-12	1.03e-10
AT3G49780	-1.04008	2.15216	13.955	0.000187398	0.00266843
AT2G29125	-1.04059	2.43982	16.1283	5.93e-05	0.000997149
AT3G48520	-1.04078	2.06689	13.3911	0.000253013	0.00346334
AT1G56550	-1.04083	4.48343	40.4031	2.08e-10	1.01e-08
AT1G46768	-1.04096	1.90235	12.2671	0.000461309	0.00575652
AT5G65280	-1.0415	1.75766	11.3142	0.000769578	0.00883968
AT1G14120	-1.04179	4.9635	46.8252	7.83e-12	4.61e-10
AT4G26690	-1.04277	7.51597	52.6644	4e-13	2.76e-11
AT1G23030	-1.04428	6.58962	51.4074	7.58e-13	5.03e-11
AT2G18730	-1.04475	4.93235	46.7937	7.95e-12	4.66e-10
AT1G62520	-1.04479	1.94382	12.6417	0.000377496	0.00486977
AT5G65990	-1.04558	4.3153	37.98	7.19e-10	3.2e-08
AT5G54040	-1.04611	2.14516	14.0819	0.000175167	0.0025199
AT3G45650	-1.04696	5.21124	49.215	2.32e-12	1.45e-10
AT5G57790	-1.04811	1.06817	7.7732	0.0053042	0.0425006
AT2G40460	-1.04864	2.03479	13.3638	0.000256718	0.00350704
AT3G47820	-1.04924	2.71046	18.7582	1.49e-05	0.000295485
AT5G01550	-1.04957	1.067	7.79454	0.00524192	0.0420919
AT5G43590	-1.05093	1.32128	9.08176	0.00258267	0.0240018
AT5G62865	-1.0516	3.98002	33.3537	7.72e-09	2.98e-07
AT3G16460	-1.05181	10.3515	52.4953	4.36e-13	3e-11
AT1G68330	-1.05213	3.184	23.495	1.26e-06	3.24e-05
AT4G12330	-1.0522	2.21095	14.6836	0.000127262	0.00192886
AT1G63370	-1.05287	3.25308	24.3437	8.08e-07	2.17e-05
AT5G52882	-1.05321	6.35939	52.2616	4.91e-13	3.35e-11
AT3G13720	-1.05367	6.95718	53.0093	3.36e-13	2.35e-11
AT4G38770	-1.05496	9.70774	53.4046	2.74e-13	1.93e-11
AT4G12730	-1.05565	8.46982	54.1524	1.88e-13	1.35e-11
AT3G49820	-1.05571	2.08013	13.855	0.000197635	0.00279642
AT4G34750	-1.05698	2.20208	14.7433	0.000123295	0.00188505
AT1G51990	-1.05796	1.578	10.6087	0.00112611	0.0120789
AT1G08500	-1.05835	6.63586	52.8155	3.7e-13	2.57e-11
AT1G66280	-1.05889	8.1947	54.5217	1.56e-13	1.13e-11
AT5G11540	-1.0593	3.97485	33.7992	6.14e-09	2.41e-07
AT4G30850	-1.05937	5.03206	48.9054	2.71e-12	1.68e-10
AT4G11280	-1.05982	2.99451	21.7377	3.13e-06	7.35e-05
AT1G60630	-1.06003	3.0029	21.8414	2.97e-06	7.02e-05
AT1G76490	-1.06072	9.01087	54.4453	1.62e-13	1.17e-11
AT1G52540	-1.06092	4.67425	45.1132	1.87e-11	1.04e-09
AT5G02090	-1.06134	3.44192	26.8173	2.24e-07	6.66e-06
AT1G27460	-1.0618	4.07055	35.3001	2.84e-09	1.18e-07
AT4G16160	-1.06201	3.05859	22.5172	2.09e-06	5.13e-05
AT3G28180	-1.06223	8.67378	54.7543	1.38e-13	1.01e-11
AT5G15830	-1.06311	3.51522	27.7471	1.39e-07	4.32e-06
AT1G76220	-1.06339	1.84554	12.3779	0.000434738	0.00546553
AT4G22212	-1.06418	5.25053	51.062	9.04e-13	5.97e-11
AT2G46270	-1.06465	5.70401	52.7795	3.77e-13	2.61e-11
AT2G39110	-1.06481	5.21156	50.8541	1e-12	6.6e-11
AT5G06740	-1.06492	2.61772	18.4566	1.74e-05	0.000337522
AT2G35770	-1.06498	2.98207	21.7926	3.04e-06	7.18e-05
AT4G29020	-1.06518	7.63075	54.9942	1.22e-13	8.99e-12
AT3G52920	-1.06592	5.0169	49.4093	2.1e-12	1.32e-10
AT5G15150	-1.06631	5.20517	50.9581	9.53e-13	6.27e-11
AT5G16340	-1.06672	4.31774	39.5078	3.29e-10	1.54e-08
AT3G09300	-1.06711	6.97551	54.3856	1.67e-13	1.2e-11
AT5G48540	-1.06744	2.92848	21.3341	3.87e-06	8.93e-05
AT4G01070	-1.06745	5.75975	53.1497	3.12e-13	2.19e-11
AT2G02610	-1.06862	1.36655	9.63296	0.00191196	0.01882
AT4G17280	-1.06906	6.24237	53.7743	2.27e-13	1.61e-11
AT3G15760	-1.0693	2.14907	14.6829	0.000127309	0.00192886
AT4G00200	-1.07059	1.5657	10.7747	0.00102948	0.0112288
AT2G23170	-1.07084	4.53064	43.4605	4.36e-11	2.29e-09
AT1G69690	-1.07142	5.08663	50.4409	1.24e-12	8.06e-11
AT2G48130	-1.07165	5.97877	53.8149	2.23e-13	1.58e-11
AT5G62490	-1.07174	3.77119	31.6299	1.87e-08	6.81e-07
AT5G14330	-1.07213	7.0453	55.0091	1.21e-13	8.95e-12
AT4G03110	-1.07248	5.91491	53.8215	2.22e-13	1.58e-11
AT3G59850	-1.07396	1.40542	9.92528	0.00163096	0.0164936
AT4G30610	-1.0742	3.94134	34.2902	4.77e-09	1.91e-07
AT5G47770	-1.07453	6.93264	55.0461	1.19e-13	8.8e-12
AT1G65840	-1.07464	7.09803	55.3348	1.03e-13	7.66e-12
AT3G13610	-1.07466	5.01128	50.1268	1.46e-12	9.32e-11
AT5G38020	-1.07616	2.50044	17.8217	2.43e-05	0.000453771
AT4G15765	-1.07708	2.52684	18.0177	2.19e-05	0.000415847
AT3G01990	-1.07715	1.00604	7.90182	0.00493993	0.040166
AT3G06990	-1.07811	1.37883	9.85497	0.00169447	0.0170028
AT5G65207	-1.07969	4.26972	39.5484	3.22e-10	1.51e-08
AT5G52900	-1.08066	2.25411	15.8094	7.01e-05	0.00114678
AT4G38080	-1.08098	4.72326	47.6307	5.19e-12	3.11e-10
AT2G29710	-1.08142	0.916422	7.53844	0.00604123	0.0468101
AT5G42250	-1.08215	6.51571	55.0934	1.16e-13	8.63e-12
AT1G76100	-1.08245	2.19655	15.3908	8.75e-05	0.00139662
AT5G66600	-1.08335	2.84111	21.1727	4.2e-06	9.6e-05
AT1G64920	-1.08868	1.44772	10.4412	0.00123294	0.0130006
AT2G35000	-1.08868	4.20566	39.104	4.04e-10	1.86e-08
AT5G46240	-1.08966	3.88217	34.3293	4.67e-09	1.88e-07
AT4G36430	-1.09002	1.28322	9.5176	0.00203594	0.0197968
AT3G25190	-1.09015	0.921099	7.66359	0.00563617	0.0443672
AT5G26320	-1.09086	2.05383	14.5556	0.000136203	0.00203698
AT2G26910	-1.09117	6.83099	56.5258	5.62e-14	4.28e-12
AT4G14819	-1.09121	1.51361	10.8712	0.000977213	0.0107388
AT2G45960	-1.09125	10.9852	55.3718	1.01e-13	7.54e-12
AT1G69480	-1.09294	2.84414	21.556	3.44e-06	8.03e-05
AT4G01830	-1.09298	2.11513	15.0967	0.000102238	0.0015995
AT3G05980	-1.09522	2.3254	16.7927	4.17e-05	0.000732517
AT1G60050	-1.09588	4.23857	40.2324	2.27e-10	1.1e-08
AT5G11420	-1.09619	8.09927	58.337	2.24e-14	1.77e-12
AT5G24120	-1.09639	1.2821	9.629	0.00191609	0.018844
AT5G24160	-1.09648	0.929174	7.80538	0.00521056	0.0419002
AT2G46780	-1.0995	4.41191	43.572	4.12e-11	2.18e-09
AT2G17300	-1.09998	4.50091	45.1785	1.81e-11	1.01e-09
AT1G11545	-1.10032	8.23111	58.7643	1.8e-14	1.45e-12
AT1G51140	-1.1006	5.27013	54.6778	1.44e-13	1.05e-11
AT5G18020	-1.10086	3.55209	30.1686	3.98e-08	1.37e-06
AT2G18980	-1.10183	5.35626	55.4922	9.49e-14	7.14e-12
AT1G08890	-1.10189	6.10653	56.9195	4.6e-14	3.56e-12
AT2G47440	-1.1021	6.03044	56.8825	4.68e-14	3.61e-12
AT4G15390	-1.10222	6.15826	56.9853	4.45e-14	3.46e-12
AT4G11650	-1.10368	6.3463	57.2142	3.96e-14	3.1e-12
AT2G37180	-1.1042	5.80152	56.7621	4.98e-14	3.81e-12
AT4G35470	-1.10436	6.08676	57.157	4.07e-14	3.18e-12
AT1G25450	-1.10507	6.09995	57.2405	3.91e-14	3.07e-12
AT4G20870	-1.10606	6.03096	57.2794	3.83e-14	3.01e-12
AT5G01220	-1.1081	4.0742	38.4028	5.79e-10	2.62e-08
AT1G64405	-1.10874	2.0354	14.8601	0.000115892	0.00178813
AT5G52990	-1.1088	4.28874	41.9706	9.33e-11	4.74e-09
AT4G23420	-1.11003	4.20748	40.6175	1.86e-10	9.09e-09
AT3G07470	-1.11121	6.77972	58.4196	2.15e-14	1.71e-12
AT1G61820	-1.11227	5.1601	54.9287	1.26e-13	9.28e-12
AT1G44130	-1.11431	0.932124	8.06425	0.00451606	0.0375185
AT2G26370	-1.11796	2.99464	24.0658	9.33e-07	2.47e-05
AT3G26170	-1.11893	2.63072	20.3873	6.34e-06	0.000138665
AT1G09480	-1.11901	1.40433	10.7264	0.00105673	0.0114812
AT1G12080	-1.11917	9.8432	59.8211	1.05e-14	8.78e-13
AT2G25090	-1.11921	3.64951	32.5769	1.15e-08	4.33e-07
AT3G41768	-1.11963	13.5111	53.9183	2.11e-13	1.51e-11
AT1G54095	-1.12098	0.801862	7.50587	0.00615146	0.047489
AT5G40420	-1.12105	5.14401	55.5431	9.25e-14	6.97e-12
AT5G02170	-1.12114	4.77585	51.985	5.65e-13	3.81e-11
AT5G57685	-1.12125	4.30615	43.1673	5.06e-11	2.65e-09
AT5G11070	-1.12197	2.64161	20.6358	5.56e-06	0.000123346
AT4G38400	-1.12327	5.2756	56.8888	4.67e-14	3.61e-12
AT1G14960	-1.12508	6.01068	59.1561	1.48e-14	1.21e-12
AT1G27140	-1.1252	2.21548	16.7845	4.19e-05	0.000735298
AT1G34047	-1.12527	0.851577	7.80748	0.00520452	0.0418616
AT3G47220	-1.12576	3.63719	32.7254	1.07e-08	4.04e-07
AT3G06390	-1.12635	2.95271	23.9244	1e-06	2.64e-05
AT2G40080	-1.12701	1.83742	13.7658	0.000207236	0.00291022
AT5G05180	-1.12738	5.1862	56.5699	5.49e-14	4.19e-12
AT5G23220	-1.12771	4.9874	54.7127	1.41e-13	1.03e-11
AT5G10430	-1.1282	9.24317	61.2527	5.09e-15	4.43e-13
AT1G63300	-1.12875	4.95959	54.639	1.47e-13	1.07e-11
AT5G24090	-1.13008	4.12883	40.6981	1.79e-10	8.73e-09
AT1G76620	-1.13108	2.74003	21.9717	2.77e-06	6.62e-05
AT4G01575	-1.13112	2.12366	16.1726	5.79e-05	0.000977055
AT2G45820	-1.13122	6.97797	60.9128	6.05e-15	5.19e-13
AT3G08600	-1.13202	3.55233	31.801	1.71e-08	6.29e-07
AT2G17890	-1.13224	1.08155	9.07625	0.00259047	0.024061
AT4G37520	-1.13229	5.91892	59.7896	1.07e-14	8.88e-13
AT1G55260	-1.13236	6.87934	60.8319	6.31e-15	5.38e-13
AT5G57260	-1.13287	1.73371	13.117	0.000292843	0.00391759
AT4G17220	-1.1336	3.99357	38.8322	4.65e-10	2.13e-08
AT4G15236	-1.13493	0.901161	8.18709	0.00422027	0.0355979
AT5G15410	-1.13505	5.48064	59.2517	1.41e-14	1.16e-12
AT3G20110	-1.13553	1.83865	13.9782	0.000185101	0.00264132
AT5G45850	-1.13657	1.31021	10.4664	0.00121622	0.0128647
AT2G31990	-1.13806	2.27438	17.5836	2.75e-05	0.000506398
AT4G05100	-1.13818	4.41966	46.6741	8.45e-12	4.94e-10
AT2G03200	-1.13843	2.82217	23.086	1.55e-06	3.94e-05
AT3G02140	-1.13849	3.69127	34.2835	4.79e-09	1.92e-07
AT5G61430	-1.13892	3.28629	28.7459	8.28e-08	2.7e-06
AT2G47770	-1.13937	5.42896	59.5494	1.21e-14	1e-12
AT3G29575	-1.13939	5.32138	58.8767	1.7e-14	1.38e-12
AT1G07750	-1.14051	6.69579	61.2578	5.08e-15	4.43e-13
AT1G15550	-1.14166	5.21317	58.1544	2.46e-14	1.94e-12
AT5G23860	-1.14224	7.13063	62.3618	2.9e-15	2.64e-13
AT3G16400	-1.14251	10.4731	61.4838	4.53e-15	3.98e-13
AT5G55780	-1.14303	1.38082	11.0301	0.000896921	0.0100303
AT1G72160	-1.14389	7.53086	63.0872	2.01e-15	1.86e-13
AT2G46810	-1.14401	2.60745	21.0339	4.52e-06	0.000102441
AT4G37220	-1.14458	4.38187	46.498	9.25e-12	5.36e-10
AT4G02410	-1.14462	1.66756	12.9125	0.00032662	0.0043094
AT2G01010	-1.1454	3.53194	32.1503	1.43e-08	5.31e-07
AT5G59930	-1.14607	2.28915	17.9894	2.22e-05	0.000420892
AT2G22770	-1.14651	5.56342	60.6453	6.93e-15	5.88e-13
AT5G47560	-1.14755	6.20043	61.6349	4.19e-15	3.72e-13
AT2G39530	-1.14914	3.02369	25.7487	3.9e-07	1.11e-05
AT5G27350	-1.14943	5.72019	61.2283	5.16e-15	4.47e-13
AT5G15265	-1.14982	3.97241	39.4984	3.3e-10	1.54e-08
AT2G32450	-1.15009	4.38776	47.044	7e-12	4.14e-10
AT5G60530	-1.15069	4.59419	51.1299	8.73e-13	5.78e-11
AT5G65158	-1.15167	2.36248	18.8062	1.45e-05	0.000288826
AT1G44608	-1.15312	3.55507	32.9982	9.26e-09	3.54e-07
AT1G13970	-1.15516	3.71245	35.6526	2.37e-09	9.95e-08
AT4G31330	-1.15528	2.83589	23.8761	1.03e-06	2.7e-05
AT1G80280	-1.15821	6.26309	62.8213	2.3e-15	2.12e-13
AT5G47640	-1.15851	4.46017	49.0923	2.46e-12	1.54e-10
AT3G63360	-1.16043	2.03965	16.2414	5.58e-05	0.000946021
AT2G39310	-1.16047	9.19746	64.7507	8.64e-16	8.59e-14
AT1G44090	-1.16316	1.70263	13.5789	0.000228923	0.00318286
AT5G59670	-1.16658	2.00045	16.0733	6.1e-05	0.00102346
AT5G44610	-1.16731	7.25495	65.2525	6.7e-16	6.72e-14
AT1G53830	-1.16732	5.73536	63.1512	1.94e-15	1.81e-13
AT5G60660	-1.16758	8.86002	65.7417	5.23e-16	5.32e-14
AT5G36150	-1.16783	1.52381	12.4548	0.00041719	0.00530646
AT5G14180	-1.16817	3.91033	39.6812	3.01e-10	1.42e-08
AT1G74420	-1.16849	1.17965	10.2125	0.00139557	0.0144436
AT2G17330	-1.16964	1.22172	10.483	0.00120539	0.0127622
AT5G01200	-1.16992	1.83635	14.7829	0.000120734	0.00185009
AT1G16850	-1.17128	4.93856	58.3768	2.19e-14	1.74e-12
AT4G25960	-1.17268	6.24128	64.3385	1.06e-15	1.04e-13
AT5G57800	-1.17304	7.00017	65.4188	6.16e-16	6.19e-14
AT1G65985	-1.17316	3.13554	28.3041	1.04e-07	3.34e-06
AT3G17580	-1.17373	3.70855	36.6079	1.45e-09	6.25e-08
AT2G19880	-1.17472	5.66814	63.8235	1.38e-15	1.33e-13
AT5G23400	-1.17865	4.14514	44.3743	2.73e-11	1.48e-09
AT1G07610	-1.1788	5.22841	61.986	3.51e-15	3.15e-13
AT4G11211	-1.17916	5.21707	61.8662	3.73e-15	3.34e-13
AT5G28010	-1.17991	0.673657	7.62397	0.00576133	0.0451304
AT4G23880	-1.18032	1.10909	9.98465	0.00157921	0.0160305
AT1G22882	-1.18142	5.78751	64.7435	8.67e-16	8.59e-14
AT1G62570	-1.18289	7.02322	66.5448	3.48e-16	3.6e-14
AT4G30530	-1.18452	6.4252	65.6296	5.53e-16	5.62e-14
AT1G14220	-1.18634	1.27504	11.0995	0.00086399	0.00972405
AT5G02220	-1.18681	0.729214	7.99925	0.00468105	0.0385744
AT5G01250	-1.18771	3.91279	40.992	1.54e-10	7.56e-09
AT3G25290	-1.18788	5.25503	63.1719	1.92e-15	1.8e-13
AT3G15115	-1.1881	4.80813	58.6094	1.95e-14	1.57e-12
AT5G38550	-1.18826	3.4497	33.421	7.45e-09	2.89e-07
AT1G17940	-1.19001	4.31697	48.6803	3.04e-12	1.87e-10
AT1G76640	-1.19191	1.31102	11.4515	0.000714781	0.00830507
AT1G11410	-1.19417	3.23771	30.7616	2.93e-08	1.03e-06
AT2G36540	-1.19533	2.16741	18.3456	1.84e-05	0.000355705
AT5G15180	-1.19533	6.18315	66.7058	3.21e-16	3.33e-14
AT1G30040	-1.19819	1.63901	13.8821	0.000194798	0.00276291
AT1G48240	-1.19897	4.86028	60.1485	8.92e-15	7.51e-13
AT2G22970	-1.19912	6.0849	67.0113	2.75e-16	2.86e-14
AT1G49450	-1.19983	4.81822	59.861	1.03e-14	8.63e-13
AT4G36220	-1.20214	5.24754	64.5366	9.63e-16	9.49e-14
AT5G17490	-1.20379	3.49268	34.8803	3.52e-09	1.44e-07
AT2G04220	-1.20389	0.634125	7.71255	0.00548535	0.043465
AT5G23950	-1.20403	2.30668	19.9028	8.16e-06	0.000174025
AT2G34350	-1.20438	4.33321	50.1104	1.47e-12	9.38e-11
AT5G15970	-1.20459	4.71573	58.4194	2.15e-14	1.71e-12
AT5G64850	-1.20574	3.07371	28.8926	7.68e-08	2.52e-06
AT3G12240	-1.20608	2.54374	22.5587	2.04e-06	5.05e-05
AT2G42560	-1.20609	3.30127	32.2377	1.37e-08	5.09e-07
AT2G40610	-1.20634	7.94747	70.254	5.31e-17	5.84e-15
AT1G35625	-1.20705	0.63495	7.75401	0.00536085	0.0428643
AT4G16447	-1.20812	1.28398	11.5717	0.000670026	0.00784264
AT1G50460	-1.20822	4.13685	46.3447	1e-11	5.77e-10
AT4G18760	-1.20938	4.76721	59.9565	9.83e-15	8.24e-13
AT5G51770	-1.20954	2.69578	24.4372	7.7e-07	2.07e-05
AT3G55950	-1.2098	4.1116	46.0692	1.15e-11	6.6e-10
AT4G33050	-1.21006	2.61811	23.5016	1.25e-06	3.23e-05
AT3G09940	-1.21047	5.07095	63.5311	1.6e-15	1.52e-13
AT4G13860	-1.21124	4.6299	57.1008	4.19e-14	3.27e-12
AT3G56250	-1.21257	1.28489	11.6586	0.000639442	0.00754246
AT1G04920	-1.21314	1.24738	11.4102	0.000730847	0.00846317
AT5G45730	-1.21363	3.16776	30.6498	3.1e-08	1.09e-06
AT2G28400	-1.21765	3.49491	35.6618	2.36e-09	9.92e-08
AT2G21720	-1.21902	3.05843	29.3119	6.18e-08	2.07e-06
AT4G02630	-1.21953	2.60683	23.7632	1.09e-06	2.85e-05
AT5G58320	-1.2213	5.37123	67.7976	1.84e-16	1.94e-14
AT4G21020	-1.22255	4.15105	47.7111	4.98e-12	3e-10
AT3G13790	-1.22367	7.02496	71.0456	3.56e-17	3.96e-15
AT5G47250	-1.22374	1.39665	12.6487	0.000376077	0.00485706
AT4G26200	-1.2238	1.59701	14.1362	0.000170187	0.00245773
AT2G39010	-1.22469	8.04611	72.3526	1.84e-17	2.1e-15
AT2G17500	-1.22641	7.19536	71.6941	2.56e-17	2.89e-15
AT1G70880	-1.2277	6.10388	70.1818	5.51e-17	6.03e-15
AT4G32770	-1.22783	2.06173	18.2841	1.91e-05	0.000365702
AT3G60220	-1.22871	3.17399	31.4459	2.06e-08	7.44e-07
AT3G58620	-1.22877	5.29638	67.8025	1.84e-16	1.94e-14
AT3G49120	-1.22885	6.74117	70.8891	3.85e-17	4.27e-15
AT4G39410	-1.22909	0.708564	8.42486	0.00370245	0.0321161
AT1G49160	-1.23003	3.04144	29.5637	5.43e-08	1.83e-06
AT2G26975	-1.2311	2.47282	22.592	2.01e-06	4.97e-05
AT5G49280	-1.23129	3.60409	38.211	6.39e-10	2.88e-08
AT3G19553	-1.23162	5.01769	65.1427	7.08e-16	7.08e-14
AT4G23870	-1.23287	4.94998	64.4807	9.9e-16	9.73e-14
AT5G42510	-1.23368	4.33352	52.5574	4.22e-13	2.91e-11
AT5G22470	-1.2352	3.69656	40.178	2.33e-10	1.12e-08
AT3G01760	-1.23527	1.40712	12.9486	0.000320395	0.00423393
AT3G02480	-1.23559	6.24908	71.143	3.39e-17	3.78e-15
AT2G37710	-1.23677	4.74281	62.0484	3.4e-15	3.06e-13
AT3G42658	-1.23722	4.87235	63.9792	1.28e-15	1.24e-13
AT5G19190	-1.23742	5.72047	70.5599	4.55e-17	5.03e-15
AT1G02650	-1.23893	1.3442	12.5637	0.000393587	0.00505599
AT2G45180	-1.23949	8.75816	73.893	8.42e-18	9.86e-16
AT5G04950	-1.24242	4.71816	62.0617	3.38e-15	3.05e-13
AT5G02070	-1.2432	0.591889	7.98085	0.00472886	0.0389112
AT3G51540	-1.24341	2.31395	21.2524	4.03e-06	9.27e-05
AT1G32170	-1.24353	7.53396	74.161	7.35e-18	8.7e-16
AT5G15350	-1.24456	7.36815	74.0553	7.76e-18	9.15e-16
AT2G36410	-1.24462	6.41263	72.2173	1.97e-17	2.24e-15
AT3G19430	-1.24575	2.65743	25.3895	4.7e-07	1.32e-05
AT5G62100	-1.24586	2.22226	20.3751	6.38e-06	0.000139316
AT1G72100	-1.24807	3.37743	35.6171	2.41e-09	1.01e-07
AT5G61200	-1.25055	2.98453	29.6709	5.14e-08	1.74e-06
AT5G02230	-1.25204	5.97222	72.6539	1.58e-17	1.81e-15
AT5G66580	-1.25357	4.65173	61.4972	4.5e-15	3.97e-13
AT1G48990	-1.25405	1.02642	10.6446	0.00110451	0.0119079
AT2G18650	-1.25665	1.52523	14.2875	0.000157035	0.00229641
AT2G02950	-1.25729	3.94696	46.2884	1.03e-11	5.93e-10
AT4G23400	-1.25844	8.96897	75.9673	2.95e-18	3.63e-16
AT1G56320	-1.25963	2.48711	23.7936	1.07e-06	2.82e-05
AT1G79270	-1.25998	5.94	73.5133	1.02e-17	1.19e-15
AT5G51780	-1.26019	4.81286	65.6221	5.55e-16	5.62e-14
AT3G19680	-1.26192	5.55371	72.8392	1.44e-17	1.66e-15
AT1G80090	-1.26234	0.726826	8.96686	0.00275021	0.0252309
AT3G26310	-1.2628	0.835768	9.60496	0.00194132	0.0190544
AT1G15210	-1.26489	6.96165	75.598	3.55e-18	4.31e-16
AT2G04100	-1.26632	3.53761	39.1576	3.93e-10	1.82e-08
AT3G01516	-1.26638	2.68224	26.4529	2.71e-07	7.92e-06
AT2G42900	-1.26752	4.89995	67.3925	2.26e-16	2.37e-14
AT2G19760	-1.26872	8.67745	77.352	1.46e-18	1.82e-16
AT5G65100	-1.26873	1.5012	14.3652	0.000150693	0.00221718
AT5G49520	-1.26895	2.35115	22.4648	2.14e-06	5.26e-05
AT3G09220	-1.2692	4.75663	65.45	6.06e-16	6.11e-14
AT2G23110	-1.27089	1.28546	12.7335	0.00035942	0.00466344
AT3G01513	-1.27195	2.80205	28.2137	1.09e-07	3.46e-06
AT1G05450	-1.27316	1.0378	11.0387	0.000892768	0.00999655
AT1G73340	-1.27403	2.42632	23.5222	1.24e-06	3.2e-05
AT1G06120	-1.27419	3.97684	48.1244	4.04e-12	2.46e-10
AT2G01880	-1.27483	4.89015	68.0203	1.65e-16	1.75e-14
AT4G10150	-1.27718	0.554452	8.16516	0.00427158	0.0359225
AT1G05300	-1.27774	1.88118	17.8872	2.35e-05	0.000439633
AT5G62220	-1.27836	3.4083	37.6931	8.33e-10	3.67e-08
AT4G10510	-1.27949	1.08379	11.4425	0.000718249	0.00834027
AT4G12440	-1.27951	0.730373	9.21757	0.00239795	0.0225588
AT1G61810	-1.27968	1.94	18.496	1.7e-05	0.000331769
AT2G21200	-1.28065	1.40439	13.8379	0.000199442	0.00281726
AT3G47960	-1.28095	5.39546	74.475	6.27e-18	7.51e-16
[truncated: 602 more rows]

## Sheet: TPM
Supplementary File 1: Differentially expressed genes (TPM (Transcripts Per Kilobase Million)) in Ler, ein6-1, een-1 and ein6-1 een-1 seedlings in response to ET
ID	Ler air rep 1	Ler air rep 2	Ler 4hET rep 1	Ler 4hET rep 2	ein6-1 air rep 1	ein6-1 air rep 2	ein6-1 4hET rep 1	ein6-1 4hET rep 2	een-1 air rep 1	een-1 air rep 2	een-1 4hET rep 1	een-1 4hET rep 2	ein6-1 een-1 air rep 1	ein6-1 een-1 air rep 2	ein6-1 een-1 4hET rep 1	ein6-1 een-1 4hET rep 2	ein2-45 air rep 1	ein2-45 air rep 2	ein2-45 4hET rep 1	ein2-45 4hET rep 2
AT1G01010	17.07	14.24	21.12	22	15.92	15.3	27.71	19.8	10.51	10.12	13.41	10.27	4.5	4.68	4.84	4.7	15.32	11.59	11.61	12.65
AT1G01020	3.63	3.72	7.66	9.58	6.91	4.98	6.71	3.62	9.09	8.27	10.76	9.47	11.14	9.1	8.54	6.92	7.26	6.24	5.66	7.51
AT1G01030	0.13	0.38	0.61	0.9	0.78	1.13	1.07	0.73	0.91	1.24	1.58	2.85	1.02	0.88	1.15	0.54	0.99	0.86	0.68	0.87
AT1G01040	5.35	6.96	6.07	8.96	8.7	8.05	11	8.03	7.58	7.49	7.54	7.66	8.58	7.96	6.22	9.01	7.99	8.15	7.72	8.4
AT1G01046	1.47	2.8	0	4.56	0	1.82	1.04	0	1.17	1.25	0	1.49	0	1.59	3.85	2.31	1.68	1.16	0	0
AT1G01050	122.37	132.11	148.89	157.39	132.66	123.29	135.95	125.31	127.63	132.88	143.99	138.16	137.1	130.94	114.04	104.39	110.1	100.99	110.3	102.39
AT1G01060	12.29	13.23	8.63	9.93	15.73	12.37	11.11	12.47	12.92	13.02	8.29	8.37	19.08	17.37	8.22	9.24	21.3	14.33	15.16	17.66
AT1G01070	9.79	7.87	8.7	7.38	3.5	6.16	5.61	6.62	12.61	15.67	13.94	11.57	13.41	12.45	21.03	22.38	10.38	8.24	10.92	9.16
AT1G01073	0	0	0	0	0	0	0	0	0	0	0	0	0	0	0	0	0	0	0	0
AT1G01080	16.34	16.01	29.06	27.47	19.03	20.91	25.58	24.1	24.48	31.1	33	37.91	22.04	24.62	20.9	20.78	29.47	32.26	29.99	30.97
AT1G01090	83.08	94.44	111.88	114.24	136.54	122.94	126.72	119.46	115.3	122.69	136.92	137.86	106.76	99.18	100.4	118.51	152.19	129.29	150.84	145.76
AT1G01100	318.65	296.25	443.52	516.89	229.14	290.11	317.4	426.14	446.07	435.79	535.08	595.25	405.47	475.98	488.11	466.97	287.71	295.64	377.88	316.47
AT1G01110	5.27	5.97	5.38	5.79	5.01	5.92	5.61	4.79	6.72	6.41	5.56	4.51	5.57	5.5	5.26	5.49	5.92	5.57	7.14	5.22
AT1G01115	0	0	0	0	0	0	0	0	0	0	0	0	0	0	0	0	0	0	0	0
AT1G01120	315.39	374.81	266.4	274.03	551.53	405.18	408.34	231.37	390.94	343.7	274.96	199.34	244.11	219.92	228.05	241.96	468.33	364	402.18	422.27
AT1G01130	10.56	9.04	9.68	7.91	10.32	8.64	9.33	8.07	4.21	6.44	9.12	8.72	4.71	7.83	7.29	4.99	9.25	9.57	8.96	9.1
AT1G01140	57.6	68.48	46.41	46.19	67.32	56.75	41.68	46.04	64.56	61.81	43.37	42.05	57.47	57.64	51.82	57.99	66.69	66.48	73.66	69.69
AT1G01150	0	0	0	0	0	0.07	0	0.08	0	0.1	0	0	0.25	0	0	0.09	0	0	0	0.2
AT1G01160	25.89	27.87	32.49	38.07	26.21	28.84	29.25	34.71	26.58	33.42	28.32	33.72	40.24	41.6	40.84	42.16	33.55	29.33	33.31	31.94
AT1G01170	61.89	54.41	132.66	84.03	51.81	53.18	70.67	63.09	47.71	65.72	62.05	79.35	53.34	58.68	42.87	59.61	51.25	53.36	60.07	58.11
AT1G01180	21.41	25.46	14.56	14.2	49.08	26.3	26.08	12.95	19.18	19.62	9.91	8.27	16.86	16.03	17.47	20.86	49.74	28.17	28.48	36.73
AT1G01183	0	0	0	0	0	0	0	0	0	0	0	0	0	0	0	0	0	0	0	0
AT1G01190	0.48	0.08	0.49	0.91	0.13	0.1	1.4	0.53	0.06	0.07	0.27	0.73	0	0	0.07	0.07	0.18	0.26	0.07	0.14
AT1G01200	24.16	22.97	14.49	19.43	18.69	20.61	11.43	17.11	29.54	28.67	18.7	19.72	19.32	25.15	21.17	20.56	20.85	22.58	31.13	28.01
AT1G01210	13.67	14	17.7	21.62	15.72	17.45	15.17	24.92	16.36	22.8	16.62	23.74	24.6	23.67	29.17	30.72	14.48	14.24	17.17	14.54
AT1G01220	8.74	9.17	8.45	12.83	11.82	11.33	11.32	10.79	13.64	13.71	14.69	16.04	14.67	13.27	12.22	16.28	10.32	9.26	10.12	10.51
AT1G01225	2.66	2.37	3.08	2.19	3.51	4.55	3.85	3.59	5.52	5.12	3.41	4.96	4.63	4.21	4.08	5.15	5.11	5.96	6.43	4.48
AT1G01230	92.63	97.9	113.76	117.25	98.75	88.33	98.07	103.73	84.9	89.72	90.56	77.37	87.98	89.61	78.26	74.2	92.73	82.39	97.19	87.37
AT1G01240	18.11	24.19	21.55	15.35	28.78	23.59	27.08	22.23	16.89	19.64	15.73	13.15	37.09	36.54	22.28	24.36	23.81	21.46	21.37	23.76
AT1G01250	0.67	0.63	0	1.04	0.28	0.42	0.97	0.85	0.67	1.12	0.75	1.35	1.09	1.1	0.75	0.27	0.19	0	0.28	0.14
AT1G01260	12	14.44	9.64	10.69	12.98	11.33	10.94	8.82	14.57	14.55	12.19	12.56	15.13	15.67	9.57	11.01	12.15	12.43	13.75	13.08
AT1G01270	0	0	0	0	0	0	0	0	0	0	0	0	0	0	0	0	0	0	0	0
AT1G01280	0	0	0	0	0	0	0	0	0	0	0	0	0	0	0	0	0	0	0	0
AT1G01290	14.36	16.12	17.15	19.62	13.77	13.6	14.59	23.07	19.3	21.17	21.21	19.47	20.22	18.74	17.65	19.25	14.71	12.59	14.33	14
AT1G01300	57.99	61.06	79.14	90.29	59.49	62.66	68.97	79.42	119.88	111.5	115.9	117.38	107.37	112.71	102.27	112.07	64.65	67.37	77.34	73.22
AT1G01305	0	0	0	0	0	0	0	0	0	0.21	0	0	0	0	0	0	0	0	0	0
AT1G01310	0	0.13	0	0	0	0	0	0	0.34	0.35	0.16	0.14	0.31	0.15	0.13	0.11	0	0.11	0.24	0
AT1G01320	10.36	13.66	19.57	24.14	19.73	22.24	25.3	29.7	30.08	39.53	40.7	56.75	15.57	16.9	18.26	31.09	26.31	31.51	26.19	30.13
AT1G01340	1.37	1.29	1.22	1.25	2.52	1.44	1.11	1.46	2.48	2.91	3.35	3.93	1.83	1.5	2.05	2.64	1.31	1.43	1.7	2.37
AT1G01350	21.19	22.82	25.37	27.79	21.36	22.37	20.75	35.28	25.84	27.26	25.76	27.72	30.11	28.22	23.63	26.02	23.75	21.02	23.72	23.18
AT1G01355	0.43	0	0.21	0.22	0	0.13	0.31	0	0.17	0	0.24	0	0	0.46	0	0	0	0.34	0.18	0.18
AT1G01360	13.95	17.87	22.45	20.72	17.85	13.88	27.56	19.75	13.65	15.22	14.35	14.07	18.77	13.74	12.58	12.68	17.4	11.28	14.38	11.59
AT1G01370	5.34	5.37	8.63	9.72	5.3	5.31	7.3	9.04	8.7	10.76	9.46	9.29	6.97	5.72	5.78	6.52	6.83	6.55	7.31	6.72
AT1G01380	19.74	17.56	22.07	19.51	4.92	9.42	13.49	21.91	20.71	21.97	15.71	20.46	42.74	33.61	37.91	31.52	9.19	11.46	15.14	10.04
AT1G01390	2.83	2.95	5.78	4.74	7.46	5.06	7.39	5.02	3.24	5	5.21	4.4	0.92	1.42	1.25	0.8	7.53	6.93	6.69	7.55
AT1G01400	0	0	0	0	0	0	0	0	0.19	0	0	0	0	0	0	0	0	0	0	0
AT1G01410	0	0	0	0	0	0	0	0	0	0	0	0	0	0	0	0	0	0	0	0
AT1G01420	6.18	6.37	5.79	7.87	8.78	7.37	9.33	9.13	8.42	8.25	8.23	6.83	6.54	6.84	6.2	7.41	5.33	3.78	4.8	4.23
AT1G01430	51.18	56.09	39.07	48.11	71.11	58.31	43.14	43.56	70.83	70.72	52.64	44.94	55.64	52.36	50.44	49.84	70.38	57.36	64.51	67.89
AT1G01440	9.93	12.44	9.88	10.76	13.95	12.09	13.75	13.6	15.13	11.6	10.64	13.47	11	11.16	11.5	12.95	14.52	10.79	13.79	13.58
AT1G01448	5.99	7.38	11.53	11.64	9.95	8.74	14.77	8.95	9.59	10.52	10.97	9.85	9.98	9.78	8.63	11.89	8.23	8.88	7.98	8.24
AT1G01450	0	0	0	0	0	0	0	0	0	0	0	0	0	0	0	0	0	0	0	0
AT1G01453	9.34	8.2	8	12.81	7.01	7.85	8.05	13.17	5.42	3.35	3.38	5.63	6.73	7.72	8.11	7.88	2.74	1.84	3.75	3.04
AT1G01460	0.18	0	0.18	0.09	0	0	0	0	0.07	0	0.1	0	0.1	0	0.08	0.07	0.1	0	0	0
AT1G01470	163.71	157.48	246.85	217.05	143.61	128.24	230.48	189.05	115.54	130.22	155.92	139.84	143.02	114.24	93.53	101.54	85.31	78.61	105.58	97.27
AT1G01471	0	0	0	0	0	0	0	0	0	0	0	0	0	0	0	0	0	0	0	0
AT1G01480	8.66	10.08	3.62	5.01	12.99	12.41	6.34	5.58	8.72	9.31	4.85	5.31	13.13	12.66	12	11.51	12.58	9.5	12.48	13.15
AT1G01490	40.23	55.78	56.8	57.86	56.23	42.5	59.44	65.71	41.74	46.38	39.52	39.26	34.55	30.65	34.83	35.14	42.44	34.71	34.38	38.57
AT1G01500	7.07	7.83	9.2	9.78	7.99	5.86	9.35	9.92	7.94	7.87	8.6	8.31	10.24	12.13	11.08	10.91	8.3	6.24	5.69	6.82
AT1G01510	15.08	20.48	20.77	26.59	20.24	19.71	20.27	26.36	27.15	28.48	30.85	31.2	28.23	28.19	22.58	25.5	21.79	24.93	23.48	21.42
AT1G01520	2.59	2.13	0.65	0.17	1.07	0.3	0.47	1.18	1.68	1.9	1.45	1.47	20.29	20.5	11.82	14.36	0.37	1.3	1.79	1.54
AT1G01530	0	0	0	0	0	0	0	0	0	0	0	0	0	0	0	0	0	0	0	0
AT1G01540	45.73	50.85	46.11	57.56	59.1	58.13	56.39	60.95	58.87	63.62	56.26	47.16	49.86	45.72	41.04	48.86	50.12	45.23	54.41	51.56
AT1G01550	156.97	177.87	187.06	174.59	205.47	158.75	206.49	154.1	156.3	159.44	175.16	140.72	156.66	144.95	146.04	137.76	196.9	155.57	170.4	170.26
AT1G01560	0.3	0	0	0.31	0.66	0	0.15	0.22	0	0.42	0	0	0.33	0.11	0.09	0	0.55	0.16	0.25	0.58
AT1G01570	2.1	3.43	2.02	2.54	2.71	3.92	1.72	2.86	2.84	2.67	1.32	1.84	3.57	2.39	2.88	3.16	4.54	3.73	3.71	4.18
AT1G01580	0.84	0.89	0.37	0.76	0.26	0.36	0.27	0.38	0.67	1.4	0.64	1.21	4.96	5.21	3.12	3.47	0.59	0.67	0.89	0.41
AT1G01590	0.18	0.34	0.48	0.43	0	0.04	0.04	0	0.82	0.8	0.34	0.85	0.13	0.39	0.22	0.24	0.41	0.34	0.61	0.26
AT1G01600	29.82	28.72	31.68	35.32	40.32	31.01	35.27	34.1	35.62	31.27	38.39	28.18	18.66	20.07	17.08	18.58	29.6	23.88	31.59	25.39
AT1G01610	58.05	66.48	38.2	48.35	67.56	64.4	43.93	32.73	80.39	61.27	45.51	42.67	57.48	55.39	57.54	64.81	96.7	86.36	99.8	94.48
AT1G01620	1442.78	1587.04	571.63	477.71	2084.44	1641.1	739.31	487.73	1212.93	1175.8	417.61	315.62	1088.72	1010.1	838.96	926.03	2254.06	1821.3	2101.76	2050.34
AT1G01630	105.01	109.63	87.53	95.39	105.48	91.11	74.93	77.92	64.51	54.89	53.29	50.61	23.33	25.45	23.94	26.59	112.25	88.62	113.02	109.92
AT1G01640	8.45	8.29	19	13.57	12.47	10.05	15.52	10.65	12.77	12.25	14.75	12.48	9.53	7.25	6.94	7.62	15.03	10.27	13.57	14.22
AT1G01650	12.59	16.11	38.08	42.27	14.51	15.08	36.77	32.77	22.05	22.07	47.48	45.1	21.2	17.09	18.83	18.02	14.86	11.8	13.64	12.19
AT1G01660	3.78	4.62	1.98	4.21	2	3.11	1.43	5.07	1.21	2.09	1.94	3.43	3.54	3.14	3.89	3.17	1.11	1.88	1.09	1.05
AT1G01670	0.19	0.26	0.47	0.48	0.15	0	0	0	0.45	0.54	0.1	0.47	0.1	0	0	0	0.32	0.07	0.24	0.16
AT1G01680	0.14	0.27	0	0	0	0	0	0	0.23	0	0.64	0.43	0	0	0	0	0.32	0.11	0.24	0.12
AT1G01690	2.67	3.44	4.46	5.59	3.28	3.19	3.32	7.57	5.12	4.85	5.97	4.24	4.82	3.5	3.93	4.11	3.71	4.22	3.88	3.9
AT1G01695	0.2	0.19	0.2	0.52	0	0.13	0.22	0	0.16	0.09	0.23	0.1	0	0.11	0.09	0	0.11	0.24	0	0.35
AT1G01700	0	0	0.27	0.09	0	0.11	0.46	0.13	0.21	0.15	0.3	0.27	0.2	0.29	0.16	0.07	0.3	0.14	0.08	0.23
AT1G01710	19.05	23.21	23.35	23.53	25.95	21.69	23.66	20.73	24.69	25.02	27.35	23.65	25.91	24.56	21.7	24.45	25.25	21.78	23.86	24.01
AT1G01720	47.82	49.56	51.6	46.48	59.73	51.97	59.96	43.06	50.62	51.19	45.08	39.42	81.83	74.25	64.09	69.55	58.63	52.87	54.25	59.35
AT1G01725	6.95	6.88	22.1	16.95	9.67	5.45	15.29	10.95	9.91	11.03	12.66	12.17	13.95	9.95	16.05	7.92	16.56	11.38	7.13	10.4
AT1G01730	30.5	34.11	42.22	36.77	28.97	28.86	35.57	37.8	34.8	33.44	35.58	38.6	34.21	31.78	26.39	30.97	30.73	31.98	36.07	30.05
AT1G01740	0.92	1.65	1.62	1.81	1.3	0.64	1	0.89	2.51	2.56	2.22	3.4	1.92	1.72	1.45	1.59	1.64	1.61	1.56	2.01
AT1G01750	86.64	88.27	83.15	123.18	58.05	75.68	65.01	122.45	57.41	47.78	63.52	68.26	87.7	88.64	93.93	73.96	33.66	32.13	43.03	42.9
AT1G01760	1.61	1.89	3.15	3.12	2.16	2.26	2.19	3.01	4.51	4.47	6.19	5.39	3.84	4.73	4.64	4.39	3.31	3.39	3.16	2.7
AT1G01770	7.33	9.09	11.95	14.16	9.62	8.46	15.76	10.95	11.48	12.16	14.38	14.24	11.47	13.43	10.39	14.42	7.8	7.8	9.07	8.84
AT1G01780	57.06	63.74	55.54	65	61.21	55.48	49.86	61.76	34.74	36.43	35.3	33.67	41.32	40.92	43.88	41.83	48.24	46.26	45.75	42.97
AT1G01790	6.6	7.94	8.18	11.09	14.78	12.05	14.57	10.82	10.75	13.14	12.12	12.58	7.81	7.11	7.18	9.15	18.81	17.3	15.74	15.64
AT1G01800	133.63	147.98	170.52	170.27	127.06	112.26	138.49	157.82	122.93	126.8	172.48	150.24	112.31	107.59	97.7	100.89	101.14	98.98	116.01	105.19
AT1G01810	1.17	1.75	0.7	2.16	1.93	1.59	0.51	1.7	0.93	1.95	1.04	1.65	1.78	1.02	0.84	2.25	0.53	1.12	1.58	1.61
AT1G01820	54.85	58.98	73	62.8	83.74	67.25	76.5	61.45	49.82	51	48.2	51.27	48.01	55.59	53.45	46.52	61.9	51.59	61.23	55.83
AT1G01830	14	15.33	13.39	15.84	19.45	16.55	21.67	16.41	14.46	13.56	11.93	9.56	10.41	11.41	9.63	10.97	14.64	13.7	14.95	16.28
AT1G01840	0.69	1.13	0.87	1.42	1.99	1.28	0.87	0.75	1.78	1.44	0.77	1.39	1.12	3.37	1.24	2.63	1.36	0.69	0.73	1.48
AT1G01860	5.27	5.23	9.64	7.14	6.45	6.57	7.86	6.26	6.39	8.5	9.16	8.77	6.81	5.87	7.14	8.98	7.95	8.37	7.12	6.76
AT1G01870	0	0	0	0	0	0	0	0	0	0	0	0	0	0	0	0	0	0	0	0
AT1G01880	0.64	1.08	0.9	0.53	1.27	1.23	0.98	1.07	1.48	1.28	1.5	1.42	0.97	0.7	0.92	1.19	1.73	1.64	2.06	1.44
AT1G01890	0	0	0	0	0	0	0	0	0	0	0	0	0	0	0	0	0	0	0	0
AT1G01900	4.41	5.82	8.1	8.34	8.97	9.25	6.69	5.78	13.05	12.21	11.61	10.23	6.25	4.81	5.33	6.58	8.46	6.98	8.21	8.42
AT1G01910	37.14	41.88	37.13	48.76	44.92	41.31	38.39	49.03	48.26	50.14	55.97	55.9	46.02	42.41	38.38	44.51	42.12	38.37	43.34	41.98
AT1G01920	7.16	7.5	9.84	14.04	6.82	7.63	9.74	11.94	11.98	13.93	15.44	17.63	18.58	18.87	12.81	17.17	8.17	8.32	9.86	9.23
AT1G01930	6.38	6.24	7.58	8.35	8.12	6.76	9.08	8.7	8.31	9.82	9.62	9.72	9.66	7.74	7.67	9.02	8.52	6.75	7.85	8.73
AT1G01940	13.91	15.11	25.27	26.05	15.54	15.12	17.45	34.16	17.98	22.31	23.63	24.51	18.57	20.1	19.47	20.51	19.07	22.73	26.09	22.52
AT1G01950	12.79	15.66	17.32	17.73	16.31	15.89	19.66	20.31	18.3	19.83	22.79	22.86	18.33	17.44	14.39	16.13	16.86	17.06	17.27	16.92
AT1G01960	20.87	22.75	25.62	33.27	31.33	27.97	35.47	29.09	41.18	38.56	49.88	47.4	36.12	33.48	28.8	34.81	27.84	28.45	27.8	30.71
AT1G01970	5.65	5.01	8.38	9.38	9.72	9.09	9.17	8.24	7.65	10.77	10.25	13.3	8.72	10.03	7.94	9.57	10.83	11.7	10.45	11.95
AT1G01980	0	0	0	0	0	0	0	0	0	0	0.08	0	0	0	0.13	0	0	0	0	0
AT1G01990	11.16	8.88	14.79	12.08	13.35	13.75	16.43	14.61	14.36	16.67	15.59	18.49	14.38	17.65	13.56	15.34	12.88	11.58	13.71	10.04
AT1G02000	13.29	12.76	11.35	13.47	18.01	17.41	15.24	13.21	21.57	19.94	15.64	13.48	18.09	16.49	20.75	21.75	22.3	16.78	20.07	20.13
AT1G02010	4.51	4.96	6.29	6.54	6.43	6.54	7.51	7.05	6.75	8.65	7.83	7.9	6.8	6.83	6.3	8.23	7.7	6.4	7.47	5.98
AT1G02020	2.64	3.21	4.57	3.99	5.93	6.15	7.87	5.18	5.19	4.74	6.2	6.08	5.19	5.51	4.23	6.2	5.77	4.45	4.9	4.27
AT1G02030	1.32	1.24	0.47	0.54	1.85	1.07	0.38	1.25	1.32	0.94	0.37	0.2	0.93	1.37	0.78	0.8	1.49	1.06	0.89	1.2
AT1G02040	0.14	0.13	0.85	0.29	0	0.26	0.2	0.31	0.11	0	0	0.14	0	0.15	0.13	0.23	0	0	0.12	0.12
AT1G02050	2.12	2.37	3.55	3.12	2.5	2.76	3.07	3.45	2.58	2.78	4.73	4.47	5.82	5.28	3.37	5.29	2.62	3.07	3.25	2.27
AT1G02060	1.46	1.7	2.23	4.44	2.12	1.82	3.22	3.06	2.65	2.19	2.54	3.88	3.43	4.14	2.42	4.24	2.31	1.87	2.12	2.27
AT1G02065	0	0.15	0	0.33	0	0.25	0.06	0.18	0.26	0.13	0.09	0.49	0	0	0.07	0	0.18	0.06	0	0
AT1G02070	0	0	0	0.26	0	0.62	0.18	0.18	0.2	0.21	0	0	0.27	0	0	0.2	0.57	0	0	0
AT1G02074	0	0	0	0	9.57	0	0	0	0	0	0	0	0	0	0	0	0	0	0	0
AT1G02080	15.69	18.19	17.76	26.68	26.59	23.69	32.06	20.54	35.98	34.87	38.69	38.52	36.66	30.04	25.07	35.55	28.34	24.76	22.16	28.58
AT1G02090	29.96	37.41	47.61	54.61	44.14	44.84	43.05	57.18	46.46	51.41	49.81	55.48	39.09	44.11	43.65	49.92	37.21	38.48	42.73	45.16
AT1G02100	27.77	29.72	38.53	38.48	31.54	31.22	45.83	31.31	34.96	33.41	33.6	33.76	36.16	31.82	31.34	33.38	36.61	31.93	32.64	37.17
AT1G02110	6.89	7.54	12.82	13.57	11.1	9.67	13.05	12.34	16.41	16.73	19.21	23.86	14.16	16.17	13.24	17.65	11.06	11.25	10.1	10.31
AT1G02120	29.5	35.92	37.59	41.86	46.47	40.26	54.62	42.05	44.61	46.1	43.04	41.63	43.32	39.71	40.1	44.45	50.25	44.92	42.89	45.85
AT1G02130	53.43	54.11	54.89	68.82	67.29	53.74	60.98	57.75	60.56	61.48	58.61	58.19	58.92	56.57	56.85	51.75	65.12	51.44	66.25	62.25
AT1G02136	0	0	0	0	0	0	0	0	0	0	0	0	0	0	0	0	0	0	0	0
AT1G02140	140.6	141.73	128.82	140.94	150.75	130.07	120.17	157.05	154.11	162.94	138.95	130.82	181.8	175.95	162.73	142.44	159.9	140.22	167.34	154.49
AT1G02145	9.85	13.22	12.86	16.79	13.85	13.37	14.45	11.35	16.62	17.84	14.39	13.93	21.58	19.81	17.35	15.37	14.26	16.45	14.71	15.83
AT1G02150	20.51	23.61	35.63	40.53	25.56	30.1	35.21	44.44	33.71	46.47	51.17	56.74	34.37	35.28	30.1	41.12	32.2	36.03	38.91	33.86
AT1G02160	35.4	29.9	45.88	42.76	31.15	29.09	32.92	37.64	25.09	34.34	31.13	35.35	35.82	31.11	33.49	31.04	31.58	28.75	28.49	29.44
AT1G02170	26.97	30.17	30.55	32.48	34.59	31.52	36.97	26.79	29.66	26.86	30	30.59	24.21	25.78	26.94	29.42	35.98	29.99	34.76	33.93
AT1G02180	7.55	9.51	8.82	11.2	7.73	7.7	6.12	9.58	9.16	8.59	8.59	7.31	5.1	6.59	10.48	7.79	10.76	7.49	11.01	9.79
AT1G02190	0.71	0.61	0.18	0.67	0.49	0.59	0.13	0.13	1.54	1.66	0.26	0.3	0.51	0.57	0.58	0.71	1.19	1.18	1.29	0.97
AT1G02205	142.34	162.18	130.98	152.69	166.76	145.59	109.09	114.44	208.39	174.71	179.92	157.38	115.25	114.4	95.72	104.64	130.68	112.7	146.18	126.92
AT1G02210	0	0	0	0	0	0	0	0	0	0	0	0	0	0	0	0	0	0	0	0
AT1G02220	7.5	8.33	7.36	10.24	1.77	1.94	3.32	3.55	5.29	6.36	7.07	7.86	2.02	1.81	2.37	1.49	5.18	7.02	8.76	7.59
AT1G02228	0	0	0	0	0	0	0	0	0	0	0	0	0	0	0	0	0	0	0	0
AT1G02230	1.63	1.53	1.01	2.06	0.62	0.78	0.73	0.64	2.5	2.72	1.82	2.02	0	0	0.11	0	2.41	1.4	0.96	1.52
AT1G02250	0	0	0	0	0.21	0	0	0	0	0	0	0	0	0	0	0	0.28	0.3	0.21	0.32
AT1G02260	11.72	12.12	11.5	14.03	11.14	9.37	11.51	6.51	9.69	11.68	10.5	9.91	9.54	10.21	8.6	7.97	13.72	11.67	12.44	12.75
AT1G02270	17	16.86	18.07	19.71	14.17	17.7	17.99	18.87	17.65	19.42	19.06	18.03	18.51	17.53	18.48	15.95	16.91	14.25	18.62	17.57
AT1G02280	62.92	69.39	108.82	95.77	76.38	83.68	91.16	91.42	65.63	101.67	102.47	117.37	91.62	91.92	70.51	86.71	87.74	90.05	90.99	90.21
AT1G02290	5.41	6.51	9.21	9.81	8.43	6.41	7.13	9.66	8.4	9.56	12.33	11.84	9.62	8.99	7.92	8.92	9.13	8.24	8.4	6.72
AT1G02300	4.45	5.2	8.97	5.71	5.74	4.16	4.22	2.06	4.9	7.9	6.78	4.6	1.3	1.3	1.27	1.14	10.32	7.74	5.89	10.42
AT1G02305	104.9	119.78	131.66	126.55	148.27	115.61	152.64	91.28	113.04	102.12	98.24	84.44	125.71	115.56	105.35	98.12	155.47	112.8	111.56	129.09
AT1G02310	2.27	2.13	1.05	1.46	3.59	2.71	1.37	2	1.59	1.03	0.63	0.57	2.99	2.48	2.82	3.36	2.03	2.88	2.25	3.11
AT1G02320	0	0	0	0	0	0	0	0	0	0	0	0	0	0	0	0	0	0	0	0
AT1G02330	19.5	25.2	25.06	27.49	25	24.61	29.56	39.2	27.29	31.13	29.21	30.92	35.76	37.66	26.38	32.69	21.91	20.23	24.8	25.62
AT1G02335	22.52	27.7	41.79	37.51	57.9	54.91	54.93	32.72	40	33.02	42.16	34.67	46.67	36.95	44.4	41.06	62.84	46.89	57	61.17
AT1G02340	23.97	24.92	23.39	22.19	33.99	26.09	27.77	17.48	34.04	35.41	24.99	18.19	33.85	27.22	25.72	19.6	41.27	35.54	37.68	38.08
AT1G02350	0.4	0.76	0.41	0	0	0.5	0.29	0.29	1.6	1.69	0.45	0	1.76	2.19	0.36	1.29	3.19	0.64	1.71	0.35
AT1G02360	35.53	34.91	31.02	34.94	49.31	36.17	32.6	29.15	35.9	35.38	35.89	40.19	55.02	45.71	51.9	47.37	24.3	29.96	31.72	29.78
AT1G02370	2.2	1.38	1.92	3.09	1.45	1.92	2.39	3.36	1.99	2.57	3.6	4.29	4.95	5.28	3.97	4.08	1	1.47	1.55	1.9
AT1G02380	2.16	2.82	3.63	3.34	1.19	2.24	2.09	5.08	2.69	2.21	3.89	4.85	3.93	4.2	4.44	3	2.31	0.77	1.12	0.83
AT1G02390	0.86	0.47	1.16	0.67	1.3	1.07	1.09	0.89	1.49	0.78	1.52	1.38	0.78	0.47	0.52	1.04	0.73	0.98	1.1	1.24
AT1G02391	0	0	0	0	0	0	0	0	0	0	0	0	0	0	0	0	0	0	0	0
AT1G02400	29.27	28.62	29.28	31.48	27.35	23.63	30.02	38.58	24.08	25.23	27.51	25.05	18.46	18.62	19.13	20.39	17.72	18.47	18.05	19.27
AT1G02405	0.6	0.28	1.5	2.15	0.49	0.56	0.86	1.09	0.48	0.5	1.33	1.5	1.3	0	1.07	0.48	1.01	0	0.51	0
AT1G02410	14.12	16.05	21.56	23.46	14.48	13.54	16.29	19.01	20.72	20.1	23.39	22.51	24.8	22.87	20.03	19.1	16.23	14.58	15.44	16.74
AT1G02420	2.48	1.66	2.94	2.74	2.49	2.26	2.06	3.23	2.62	3.04	4.55	4.47	3.66	3.48	4	2.72	2.7	2.06	3.08	2.6
AT1G02430	0.63	2.36	2.11	2.58	1.73	2.08	1.06	1.82	2.33	2.97	3.03	2.32	2.96	1.37	2.26	3.36	3.55	2.01	3.72	2.17
AT1G02440	0.53	0	0.27	0	0	0	0.39	0.2	0	0.22	0.6	0	0	1.17	0.48	0.21	0.3	0.43	0	0.23
AT1G02450	0.29	0.81	0	0.3	0.95	0.72	0.21	0.84	0.92	0.72	0.32	0.29	1.88	1.57	0.26	0.23	0.65	0.23	0.49	0.75
AT1G02460	1.71	1.61	2.65	4.4	0.71	2.22	2.33	5.4	2.84	4.71	6.52	6.25	5.27	4.35	4.57	6.15	1.77	3.37	2.72	3.51
AT1G02470	2.91	1.98	3.58	3.67	1.07	0.91	1.18	0.6	3.23	4.06	3.43	3.1	4.41	3.18	10.35	4.43	1.83	1.05	2.06	1.26
AT1G02475	5.36	8.26	16.19	13.04	17.46	12.05	14.88	8.03	9.03	10.22	11.14	11.11	10.86	10.4	11.54	11.75	13.98	13.82	10.35	10.81
AT1G02480	0	0	0	0	0	0	0	0	0	0	0	0	0	0	0	0	0	0	0	0
AT1G02490	0	0	0	0	0	0	0	0	0	0	0	0	0	0	0	0	0	0	0	0
AT1G02500	504.46	537.44	567.71	679.43	739.21	733.93	711.32	953.41	617.27	607.39	582.29	553.13	761.68	684.64	662.42	675.29	715.01	650.21	754.71	758.67
AT1G02510	0	0	0	0	0	0	0	0	0	0	0	0	0	0	0	0	0	0	0	0
AT1G02520	2.94	3.45	1.93	4.05	3.43	4.49	2.97	3.26	5.12	4.91	4.35	4.28	8.62	6.8	8.58	7.53	5.09	4.81	4.65	4.7
AT1G02530	0.12	0.03	0.03	0.06	0.05	0.16	0.09	0.11	0.12	0.08	0.03	0	0.1	0.1	0.17	0.15	0.24	0	0.05	0.11
AT1G02540	0	0	0	0	0	0	0	0	0	0	0	0	0	0	0	0	0	0	0	0
AT1G02550	0	0	0	0	0	0	0	0	0	0	0	0	0	0	0	0	0	0	0	0
AT1G02560	75.37	82.1	124.18	121.97	94.58	108.41	102.37	124.86	123.83	151.22	161.91	180.98	95.79	98.09	94.61	118.58	121.57	127.67	129.68	132.18
AT1G02570	12.57	10.95	8.03	12.79	8.86	9.73	6.22	9.05	7.22	7.06	6.16	7.73	15.19	13.88	12.85	10.25	4.51	5.89	5.2	5.83
AT1G02575	1.7	1.89	0.94	0.96	0.51	1.45	0.9	0.68	0.74	0.65	0.17	0.47	2.02	2.03	3.07	2.12	0.18	0.25	0.39	0.67
AT1G02580	0.55	0.41	0.22	0.28	0.27	0.38	0.2	0.24	0.26	0.05	0.12	0.17	0.36	0.3	0.6	0.18	0.37	0.27	0.37	0.38
AT1G02590	0	0	0	0	0	0	0	0	0	0	0	0	0	0	0	0	0	0	0	0
AT1G02600	0	0	0	0	0	0	0	0	0	0	0	0	0	0	0	0	0	0	0	0
AT1G02610	6.19	5.27	8.02	6.84	6.33	6.06	6.41	6.77	4.82	7.28	5.6	4.01	6.9	8.04	10.19	7.01	6.17	3.78	6	4.72
AT1G02620	0	0	0	0.22	0	0	0.15	0.16	0	0	0	0.21	0.46	0	0.96	1.03	0	0.17	0	0.37
AT1G02630	0.46	0.32	0.32	0.47	0	0.06	0.2	0.12	0.26	0.54	0.31	0.33	0.18	0.3	0.58	0.33	0.55	0.41	0.62	0.07
AT1G02640	63.48	72.46	76.06	92.52	49.88	55	54.28	78.64	118.44	128.17	126.06	138.95	95.15	105.47	154.4	168.31	75.01	95.84	103.07	89.11
AT1G02650	1.6	3.01	1.26	1.13	5.16	3.21	1.47	1.23	1.69	2.26	2.17	1.53	2.3	2.03	1.91	2.52	4.01	2.77	4.29	2.41
AT1G02660	13.19	16.46	12.56	14.49	20.51	16.89	23.32	8.77	14.5	13.41	11.82	9.32	13.89	11.15	13.54	14.82	27.71	20.83	19.1	23.42
AT1G02670	0.31	0.88	0.69	0.52	0.72	0.39	0.64	0.23	0.7	1.2	0.77	1.01	1.16	1.71	0.96	1.87	1.06	0.85	1.01	1.25
AT1G02680	7.81	8.2	12.8	10.09	9.1	10.2	10.09	10.72	9.53	11.79	9.74	11.73	13.84	14.7	9.66	11.72	9.87	10.17	8.82	10.45
AT1G02681	0	0	0	0	0	0	0	0	0	0	0	0	0	0	0	0	0	0	0	0
AT1G02690	5.88	7.44	7.05	10.34	7.52	11.39	9.2	10.82	12.54	14.74	14	14.58	14.45	12.62	9.9	13.91	13.51	13.12	13.71	14.11
AT1G02700	4.89	6.46	3.46	2.86	1.53	2.14	0.77	1.54	4.33	10.18	3.99	6.27	42.78	44.31	24.93	29.96	2.54	3.49	5.27	2.74
AT1G02710	0	0	0	0	0	0	0	0	0	0	0	0	0	0	0	0	0	0	0	0
AT1G02720	8.34	7.36	10.59	15.82	12.69	10.93	11.2	14.51	13.92	11.52	14.43	13.34	13.75	14.63	13.94	16.1	10.3	7.94	10.34	9.83
AT1G02730	5.64	7.38	6.07	10.51	8.74	11.51	7.62	14.06	18.54	23.14	16.89	19.18	11.42	11.11	8.82	11.09	16.89	16.4	17.91	19.57
AT1G02740	8.82	8.38	7.37	10.12	8.61	7.55	9.96	12.64	9.79	9.64	12.19	9.2	15.82	13.02	9.14	11	8.73	7.22	7.22	7.54
AT1G02750	13.68	14.4	17.5	15.93	13.33	11.31	15.16	12.57	11.9	14.94	15.12	12.55	18.62	16.87	11.75	14	14.24	13.14	14.61	11.59
AT1G02760	0	0	0	0	0	0	0	0	0	0	0	0	0	0	0	0	0	0	0	0
AT1G02770	7.88	9.46	7.39	9.14	4.16	2.8	3.18	3.59	10.15	11.82	11.12	10.93	8.11	7.65	9.58	8.65	10.53	10.26	11.42	11.17
AT1G02780	527.85	535.46	670.43	797.26	394.28	522.52	452.97	1008.25	655.93	798.43	955.42	990.44	686.1	742.42	619.06	691.09	448.84	468.51	638.68	518.33
AT1G02790	0	0	0	0	0	0	0	0	0	0	0	0	0.08	0	0.85	0	0	0	0	0
AT1G02800	16.86	20.16	28.31	22.49	4.82	5	5.77	1.49	28.12	35.1	32.83	35.92	1.19	1.67	0.92	2.77	33.76	35.08	29.02	34.1
AT1G02810	25.79	24.29	27.39	30.11	29.61	26.61	40.7	28.83	31	28.2	31.71	28.66	25.45	22.15	25	22.94	14.96	12.32	17.02	12.79
AT1G02813	0.25	0.23	0.5	0	0	0.46	0.18	0.18	0.2	0.41	0.55	0.5	0.54	0	0.22	0.59	0.28	0	0	0.21
AT1G02816	53.21	54.08	53.59	50.64	57.7	46.45	52.12	42.74	58.87	50.64	52.6	43.83	101.3	76.25	74.91	59.59	53.76	43.58	46.14	52.21
AT1G02820	0	0.46	0.5	0	0	0.46	0.71	0	0.39	0.2	0.27	0.25	0	0	0	0	0.55	0.59	0.21	0.42
AT1G02830	0	0	0	0	0	0	0	0	0	0	0	0	0	0	0	0	0	0	0	0
AT1G02840	65.92	76.49	91.13	89.62	76.1	81.15	90.47	98.23	89.6	93.76	97.3	103.41	107.41	108.5	92.25	101.75	89.89	82.93	89.31	91.48
AT1G02850	10.23	8.46	7.85	9.69	6.39	5.26	6.57	8.36	7.67	10.31	7.49	10.78	25.78	24.69	22.27	19.02	3.74	4.31	3.02	4.01
AT1G02860	8.77	8.32	8.74	9.3	5.54	4.98	7.48	7.02	6.86	6.11	8.83	8.58	7.58	7.7	8.77	10.27	10.89	9.57	10.64	9.89
AT1G02870	15.67	17.24	33.76	34.36	18.73	18.99	26.2	45.84	24.48	26.1	42.82	42.55	35.42	31.66	30.65	36.67	14.9	16.81	21.2	18.73
AT1G02880	27.75	34.76	34.44	30.77	37.32	31.75	32.59	36.17	33.74	33.86	29.8	26.05	37.86	35.73	34.45	29.13	44.28	31.36	29.03	38.56
AT1G02890	24.71	27.9	28.94	35.5	33.81	29.93	39.33	31.32	36.64	37.39	43.48	43.09	36.36	37.02	34.8	43.09	32.7	31.96	32.11	35.27
AT1G02900	182.09	181.71	207.11	191.7	163.53	155.11	218.16	264.41	119.76	128.64	133.8	118.18	104.39	85.12	115.24	117.3	127.27	106.96	121.28	117.11
AT1G02910	10.03	13.5	20.11	21.18	19.32	17.64	21.03	18.63	18.21	22.92	24.81	23.17	12.37	14.14	13.05	14.23	17.76	17.4	18.49	19.15
AT1G02920	17.21	15.24	17.63	16.03	189.4	7.64	7.8	4.25	34.15	38.38	37.34	33.35	5.6	5.39	6.34	6.32	18.86	11.98	9.39	13.24
AT1G02930	22.55	22.78	24.81	21.76	185.37	4.45	3.22	3.15	36.41	39.08	48.77	42.69	8.69	6.9	5.35	8.02	23.38	16.21	14.59	26.95
AT1G02940	0	0	0	0	0	0	0	0	0	0	0	0	0	0	0	0	0	0	0	0
AT1G02950	10.15	15.01	25.5	21.24	26.92	24.99	44.8	25.8	17.8	19.57	20.15	16.92	20.48	17.29	17.42	17.34	47.13	32.26	37.18	44.38
AT1G02952	0	0	0	0	0	0	0	0	0	0	0	0	0	0	0	0	0	0	0	0
AT1G02960	10.93	11.82	15.32	15.03	16.65	15.14	17.35	17.68	14.67	17.33	18.04	15.2	17.08	18.12	14.39	16.84	15.32	14.43	16.91	17.11
AT1G02965	0	0	0	0	0	0	0	0	0	0	0	0	0	0	0	0	0	0	0	0
AT1G02970	1.87	2.34	2.64	3.28	2.85	2.41	1.86	3.68	3.37	4.1	4.94	5.49	4.44	3.02	3.25	3.96	2.5	2.6	3.75	3.83
AT1G02980	0.11	0	0.27	0.17	0	0	0.08	0.08	0.09	0.05	0.06	0	0.18	0.18	0.05	0.09	0.18	0	0.23	0.09
AT1G02990	6.58	7.52	6.28	8.02	10.03	8.97	9.21	8.95	8.73	8.86	8.16	7.6	10.16	8.72	7.48	9.74	9.75	7.39	8.14	9.61
AT1G03000	6.83	8.76	10.12	12.39	9.63	11.1	13	10.92	11.88	13.62	14.83	16.54	12.43	14.23	12.6	15.46	9.41	11.63	9.64	10.58
AT1G03010	1.21	1.14	2.14	2.93	0.7	1.36	1.72	2.16	1.69	1.62	3.11	2.57	1.98	1.92	1.59	2.1	2.54	1.36	1.85	2.1
AT1G03020	0	0	0	0	0	0	0	0	0	0	0	0	0	0	0	0	0	0	0	0
AT1G03022	0	0	0	0	0	0	0	0	0	0	0	0	0	0	0	0	0	0	0	0
AT1G03030	14.12	14.19	24.2	21.83	17.82	16.86	23.9	19.3	14.41	16.33	20.47	19.29	27.55	22.27	17.44	21.37	18.52	15.94	16.79	14.42
AT1G03040	15.73	19.69	26.99	27.16	21.53	20.9	29.2	22.5	23.27	24.52	25.7	30.37	28.91	23.86	23.47	30.07	23.8	21.11	21.88	25.75
AT1G03050	0	0	0	0	0	0	0	0	0	0	0	0	0	0.07	0	0	0	0	0	0
AT1G03055	0.15	0	0	0.16	0	0	0	0.11	0.21	0.5	1.09	0.46	0.49	0.16	0.68	0.36	0	0.24	0.24	0.39
AT1G03060	7.59	7.56	5.13	8.95	10.22	9.87	10.12	8.98	12.4	12.45	12.76	13.06	11.43	9.86	8.08	11.16	10.23	8.69	8.67	10.32
AT1G03070	3.09	3.02	3.37	2.9	2.61	4.89	3.3	1.56	4.17	3.25	3.54	2.43	3.5	3.8	3.98	3.56	7.27	3.82	4.31	4.98
AT1G03080	23.27	27.33	18.47	23.45	34.04	29.14	29.28	30.29	26.53	31.14	23.33	24.44	33.38	29.53	23.81	32.51	33.89	30.94	33.31	35.88
AT1G03090	19.77	25	38.31	32.54	29.61	21.11	49.07	19.21	26.99	25.68	28.68	24.23	14.9	13.74	11.81	14.33	23.55	15.14	16.14	20.15
AT1G03100	0.68	0.45	0.98	0.85	0.48	0.48	0.67	1.41	1.01	1.38	1.41	1.56	1.79	1.85	1.18	1.8	0.38	0.89	1.03	0.84
AT1G03103	0	0	0	0	0	0	0	0.17	0	0	0	0.23	0	0.25	0	0	0	0.19	0	0
AT1G03106	14.71	10.3	8.86	12.83	5.87	5.99	6.19	5.29	12.18	15.75	9.43	11.36	103.29	82.85	63.46	40.8	8.21	10.67	12.81	8.32
AT1G03110	6.49	6.95	10.05	11.82	7.69	8.91	8.44	10.91	10.89	11.2	17.17	17.53	13.76	13.8	12.91	13.49	8.26	8.72	10.01	8.49
AT1G03120	3.96	5.58	2.28	5.53	1.87	3.16	3.68	3.3	4.73	7.34	4.42	5.99	24.02	36.04	17.01	17.48	0	4.07	6.71	3.9
AT1G03130	11.24	17.9	27.82	21.55	26.3	21.67	26.73	30.73	12.33	17.11	13.24	13.85	3.57	2.72	3.24	4.9	41.85	26.98	32.67	25.77
AT1G03140	42.48	45.46	46.63	52.1	45.13	44.78	52.67	57.23	46.02	50.42	49.75	52.03	44.68	47.68	46.5	48.93	39.22	38.1	40.32	40.28
AT1G03150	25.19	25.14	33.57	32.14	26.25	25.56	25.66	27.42	34.32	37.14	32.24	39.08	34.19	30.86	31.75	29.79	21.27	24.18	25.79	29.63
AT1G03160	6.69	8.31	12.67	12.88	9.25	10.37	13.9	10.76	14.17	18.37	19.3	24.01	13.31	13.62	11	16.04	12.56	12.71	12.34	12.88
AT1G03170	1.42	0.97	0.78	0.66	0.43	0.48	0.47	0.56	0.93	1.29	0.72	0.78	0	0.14	0	0.21	0.73	1.55	1.09	2.23
AT1G03180	1.88	1.62	2.75	2.25	2.24	2.13	2.08	3.51	1.72	1.92	3.03	2.27	2.73	3.5	2.23	2.09	3.21	1.94	2.74	3.22
AT1G03190	5.85	5.5	6.67	7.79	6.14	6.26	7.33	5.97	8.79	9.3	8.44	9.44	7.91	8.33	7.69	9.69	6.17	7.78	7.19	7.17
AT1G03200	3.81	5.02	5.37	5.88	5.03	4.5	7.14	2.22	7.28	7.34	13.18	6.53	8.3	9.12	10.23	12.51	5.18	5.17	8.07	6.89
AT1G03210	41.15	45.56	47.34	41.4	58.84	42.12	63.02	41.75	22.85	28.45	26.88	25.26	32.42	26.27	29.02	30.93	49.32	40.74	43.71	47.38
AT1G03220	180.68	166.33	102.35	133.71	271.97	239.51	195.8	97.98	203.06	185.61	136.09	134.93	317.9	311.1	325.83	345.16	221.02	207.12	203.57	236.66
AT1G03230	14.53	16.16	12.18	16.03	18.29	22.15	12.99	14.01	26.97	26.18	22.23	24.36	24.53	26.02	26.95	31.55	17.88	21.31	21.82	20.46
AT1G03240	0	0.65	0.69	0.35	0	0	0.5	0.25	0.27	0.29	0.38	0.35	0	1.88	0	0.55	0	0	0.88	0.59
AT1G03250	24.28	26.24	31.47	33.5	27.97	30.44	26.57	32.71	32.95	32.1	32.03	36.5	25.07	27.99	23.55	26.41	31.34	27.97	31.89	29.81
AT1G03260	15.76	15.56	20.28	22.43	13.26	13.83	14.88	15.25	16.07	13.44	17.82	14.8	15.44	14.61	14.14	15.04	13.9	15	15.13	15.61
AT1G03270	0.78	1.64	2.19	2.24	1.72	2.38	2.4	1.97	1.6	2.91	2.82	2.81	5.78	4.94	3.69	4.7	1.08	1.6	2.88	1.73
AT1G03280	21.89	27.46	25.5	26.03	30.81	29.29	32.6	34.16	28.99	29.8	26.16	27.72	27.87	25.53	25.56	27.31	32.83	26.06	26.21	32.05
AT1G03290	15.36	14.57	18.27	22.56	23.24	16.79	25.55	16.44	15.93	13.43	16.99	15.22	12.81	8.61	8.8	8.88	21.99	14.31	14.07	17.44
AT1G03300	1.2	0.54	1.34	1.89	0.84	1.22	1.2	1.48	1.01	1.38	1.34	2.04	0.83	1.11	0.63	1.07	1.22	1.37	1.24	1.92
AT1G03310	3.95	5.24	5.49	8.15	6.61	6.43	6.67	7.75	7.1	8.21	9.02	9	5.84	5.76	6.69	6.16	6.35	5.86	6.93	7.03
AT1G03320	0	1.47	0.22	1.15	0.74	0.83	0.97	0.97	1.42	1.3	1.49	2.25	0.49	0.49	0.2	0.18	0.5	1.6	0.94	1.73
AT1G03330	53	61.63	69.8	68.76	53.33	46.87	52.77	62.2	55.16	68.06	64.07	65.71	69.89	67.16	65.53	61.91	55.02	54.04	58.45	49.58
AT1G03340	3.77	4.22	3.49	3.47	2.53	1.97	2.07	1.56	5.29	6.23	5.12	4.63	5	5.23	3.87	3.04	4.5	3.27	2.94	4.15
AT1G03350	46.92	53.65	45.2	58.56	51.96	48.93	55.03	68.26	57.16	55.98	54.44	54.65	60.21	52.31	48.97	51.93	45.86	41.37	58.2	52.35
AT1G03360	4.73	3.06	5.61	7.9	3.3	4.91	4.65	9.42	4.61	7.21	8.68	9.32	6.52	7.57	7.87	7.29	4.28	5.21	7.93	5.63
AT1G03365	6.31	6.38	5.86	8.68	7.72	6.95	7.69	8.42	8.6	10.04	10.93	10.9	10.28	10.94	7.74	8.95	7.83	8.03	8.71	8.48
AT1G03370	13.88	13.28	10.38	16.2	18.26	15.75	18.49	13.89	17.66	16.3	16.96	14	15.83	14.81	15.25	15.74	18.03	16.44	14.19	16.48
AT1G03380	20.08	23.88	24.5	25.76	33.01	25.44	34.5	20.72	21.77	19.77	19.83	19.75	21.66	19.27	15.59	21.4	28.94	22.58	21.47	27.26
AT1G03390	0	0	0	0	0	0	0	0	0	0	0	0	0	0	0	0	0	0	0	0
AT1G03400	1.72	2.53	2.93	2.55	3.56	3.22	5.08	2.9	2.58	2.34	2.16	1.52	1.52	2	1.26	1.56	2.8	2.59	1.55	2.05
AT1G03410	6.91	9.47	5.72	6.1	6.88	5.63	3.4	5.31	4.27	4.79	3.22	4.11	7.83	6.1	7.62	6.27	24.94	17.08	16.57	16.71
AT1G03420	25.67	23.53	9.12	13.1	21.82	23.89	8.76	14.77	26.74	22.56	12.78	12.82	28.51	30.26	28.44	23.14	31.32	24.79	30.51	29.49
AT1G03430	19.42	21	26.92	29.46	26.58	19.79	30.16	18.61	23.88	22.37	23.9	16.9	23.03	17.13	16.43	15.01	32.94	25.02	23.45	27.94
AT1G03440	3.1	2.04	4.14	3.04	3.84	3.53	3.83	3.11	3.65	4.28	3.46	3.13	2.11	1.69	1.54	2.88	4.91	3.67	3.81	4.09
AT1G03445	0.41	0.35	0.46	0.43	1.74	1.12	1.3	0.2	2.46	2.5	1.28	0.88	1.95	2.61	1.91	2.26	1.09	1.07	1.11	1.15
AT1G03457	19.84	22.23	10.18	9.11	18.99	19.08	9.02	11.36	21.8	23.21	12.05	11.57	21.67	18.99	20.68	23.03	23.09	17.84	20.04	18.94
AT1G03470	8.52	9.96	8.84	8.34	9.22	8.87	8.09	8.39	9.97	14.69	10.69	9.32	17	18.96	11.11	14.89	9.28	9.49	10.43	12.5
AT1G03475	46.57	55.57	85.15	88.52	64.82	72.66	81.27	82.06	80.97	102.81	120.53	133.45	54.85	61.62	51.93	70.35	85.91	87.98	93.45	86.52
AT1G03490	0	0	0	0	0	0	0	0	0	0	0	0	0	0	0	0	0	0	0	0
AT1G03495	0	0	0	0	0.24	0.05	0	0.05	0.06	0.12	0.08	0	0.08	0	0.07	0.12	0.17	0.06	0.19	0.19
AT1G03502	0	0	0	0	0	0	0	0	0	0	0	0	0	0	0	0	0	0	0	0
AT1G03506	0	0	0	0	0	0	0	0	0	0	0	0	0	0	0	0	0	0	0	0
AT1G03510	0.41	0.48	0.93	1.38	0.85	0.83	0.89	0.97	0.74	1.12	1.15	1.55	0.56	0.45	1.21	1.57	0.46	0.58	0.78	0.53
AT1G03515	0	0	0	0	0	0	0	0	0	0	0	0	0	0	0	0	0	0	0	0
AT1G03520	13.32	13.56	15.33	15.93	19.44	14.86	18.77	11.21	15.03	16.16	11.38	10.53	15.7	13.5	11.61	12.54	18.95	16.44	16.94	19.28
AT1G03530	2.56	2.63	3.4	5.33	3.03	3.07	3.33	5.31	4.05	5.09	6.42	8.72	6.52	6.12	6.07	7.96	2.68	3.1	3.48	2.93
AT1G03540	0.21	0.66	1.34	1.45	0.81	0.52	0.97	1.43	1.29	1.29	0.94	1.56	1.15	1	0.95	1.25	0.63	0.9	0.3	0.85
AT1G03545	0.33	1.02	0.44	1.01	0.36	0.95	0.63	0.64	0.7	1	1.46	1.43	0.83	1.43	0.98	1.14	0.49	0.09	0.37	0.28
AT1G03550	6.55	6.55	8.19	9.14	8.55	7.96	9.34	7.78	8.6	9.81	8.02	8.31	13.69	10.72	12.49	14.4	7.29	7.44	8.33	6.67
AT1G03560	3.52	3.06	4.58	5.67	3.89	4.58	5.1	5.93	4.57	4.51	7.77	5.1	5.07	4.29	4.21	4.99	3.49	3.69	3.86	4.42
AT1G03570	0	0	0	0	0	0	0	0	0	0	0	0	0	0	0	0	0	0	0	0
AT1G03580	0	0.1	0.45	0.68	0	0	0.08	0.16	0.35	0.56	0.62	0.22	0.12	0	0.2	0.09	0.38	0.35	0.09	0
AT1G03590	29.62	39.01	26.36	26.45	37.97	31.98	26.26	24.62	35.5	37.72	25.59	25.18	31.55	26.51	27.17	28.34	43.64	32.35	36.93	39.35
AT1G03600	22.85	22.86	39.03	30.32	39.56	46.53	35.73	32.53	31.07	41.62	29.8	34.11	27.88	29.91	25.62	37.24	58.95	52.36	55.79	51.18
AT1G03610	16.52	16.97	15.47	18.61	19.63	17.84	23.07	12.04	19.84	20.85	19.13	17.36	31.18	30.76	19.45	21.18	20.07	18.3	20.22	20.5
AT1G03620	0.33	1.07	1.64	0.84	1.61	0.71	1.65	2.02	0.91	1.77	0.18	1.64	3.19	1.95	1.76	1.97	1.11	0.91	0.97	1.41
AT1G03630	11.6	16.31	29.06	28.76	23.24	29.19	28.67	34.03	22.39	32.98	29.81	38.25	11.6	17.82	18.81	23.2	38.08	41.26	37.26	43.16
AT1G03640	0	0	0	0	0	0	0	0	0	0	0	0	0	0	0	0	0	0	0	0
AT1G03650	1.08	0.67	1.62	1.66	1.18	1.9	1.56	1.96	2.29	1.95	4.6	4.16	2.15	1.37	3.07	1.88	1.62	2.15	1.22	2.17
AT1G03660	1.21	3.98	3.65	4.35	1	1.5	0.87	0.44	3.84	2.53	7.42	1.83	2.64	2.62	3.76	1.44	4.79	7.69	6.66	4.15
AT1G03670	0	0	0	0	0	0	0	0	0	0	0	0	0	0	0.06	0	0.16	0	0	0
AT1G03680	43	44.86	84.06	67.56	55.67	55.63	64.07	73.5	55.37	82.06	85.97	91.49	39.53	43.77	40.55	40.31	76.6	68.71	71.23	73.03
AT1G03687	6.2	7.21	9.79	8.91	7.06	7.97	9.9	9.31	9.08	9.53	9.3	13.5	8.09	9.68	8.16	9.8	6.45	6.77	8.73	9.25
AT1G03700	6.51	5.69	1.41	2.4	9.22	8.54	3.7	1.36	4.27	4.09	1.56	1.88	10.64	12.68	11.5	15.15	19.74	17.11	20.71	22.3
AT1G03710	0.14	0.18	0	0.15	0.32	0.27	0.28	0.42	0.61	0.72	0.48	0.6	0.63	0.42	0.39	0.7	0	0	0.33	0.17
AT1G03720	0	0	0	0	0	0	0	0	0	0	0	0	0	0	0	0	0	0	0	0
AT1G03730	6.47	5.96	8.82	8.11	8.38	7.19	10.03	7.03	7.7	6.9	7.51	6.78	7.19	6.1	7.33	7.16	7.18	4.27	5.38	5.97
AT1G03740	12.37	13.75	14.47	16.19	21.56	15.31	21.91	20.01	12.77	11.73	16.04	14.48	14.56	13.33	13.54	14.67	16.41	12.66	13.37	14.39
AT1G03743	0	0	0	0	0	0	0	0	0	0	0	0	0	0	0	0	0	0	0	0
AT1G03746	0	0	0	0	0	0	0	0	0	0	0	0	0	0	0	0	0	0	0	0
AT1G03750	4.3	3.95	3.77	4.67	5.1	4.22	6.48	5.04	4.22	5.12	6.16	4.29	5.85	5.82	4.35	4.34	4.7	3.71	4	4.61
AT1G03760	4.76	3.4	4.7	7.94	5.82	5.28	5.11	7.77	5.4	9.08	7.23	8.45	14.82	14.13	9.97	9.45	3.44	4.65	4.2	4.61
AT1G03770	4.42	4.65	6.13	5.95	4.09	5.12	5.4	8.13	1.8	1.75	1.95	1.53	2.09	2.9	1.08	1.56	5.45	5.11	7.08	5.71
AT1G03780	3.03	4.85	4.75	6.51	5.91	6.1	4.8	9.92	8.21	10.56	9.66	11.53	5.31	6.08	4.45	6.1	8.99	9.32	9.86	10.06
AT1G03790	29.91	31.05	49.92	49.8	25.79	21.77	79.36	36.55	28.37	32.97	41.68	36.34	104.89	94.01	69.99	84.16	8.41	15.09	17.65	15.3
AT1G03800	1.95	1.84	1.38	1.81	1.29	0.85	2.26	1.14	0.94	1.47	0.87	1.38	0.64	1.49	0.88	0	1.33	0.63	0.66	0.51
AT1G03810	0	0	0	0	0	0	0	0	0	0	0	0	0	0	0	0	0	0	0	0
AT1G03820	2.44	2.3	1.8	2.18	2.15	4.36	2.36	4.99	2.99	6.68	2	1.31	7.63	6.04	6.31	5.25	7.37	7.3	7.87	7.04
AT1G03830	1.7	2.95	2.74	4.32	2.19	2.74	2.85	5.01	3.89	4.8	6.08	6.48	5.37	5.57	4.67	6.63	2.18	2.64	2.45	3.17
AT1G03840	1.15	1.22	1.16	1.42	2.15	2.29	1.33	2.29	1.9	2.12	1.45	1.39	3.25	4.27	4.15	3.09	2.77	3.56	2.14	3.85
AT1G03850	70.13	87.34	66.81	60.83	66.55	61.77	52.81	43.85	44.49	49.23	41.6	44.66	64.17	67.03	78.22	78.41	99.27	82.3	85.46	90.1
AT1G03860	37.14	35.3	51.78	66.74	38.84	40.73	39.68	60.33	56.28	62.14	78.36	87.01	54.85	62.7	61.56	61.34	38.59	39.71	44.26	44.18
AT1G03870	1933.66	1960.97	683	667.02	1899.52	1620.83	619.11	521.9	1680.29	1549.54	673.24	523.87	1076.97	973.19	896.97	947.65	1685.06	1378.71	1879.23	1583.82
AT1G03880	29.59	32.35	32.67	43.16	2.1	1.28	1.21	9.77	29.45	89.25	48.53	91.94	89.14	103.62	69.03	80.22	1.26	4.32	2.76	2.88
AT1G03890	1.29	2.66	3.11	2.92	0.14	0.05	0.12	0.69	1.78	6.74	4.69	10.73	1.12	0.66	0.46	0.69	0.1	0	0.07	0.07
AT1G03900	149.56	174.59	197.11	195.12	154.54	155.49	181.2	223.23	162.64	168.98	185.87	188.22	177.92	172.76	152.28	165.78	143.29	133.52	160.82	145.43
AT1G03905	7.66	7.86	8.9	11.65	10.12	8.73	10.93	12.88	8.65	7.79	8.94	8.79	10.9	9.26	8.4	9.02	7.59	6.6	7.39	7.74
AT1G03910	23.58	28.71	31.25	38.96	26.51	30.53	33.11	46.27	31.92	39.35	45.19	41.96	36.43	37.22	28.6	40.49	24.08	25.72	29.83	28.43
AT1G03920	7.89	10.52	7.43	7.8	11.14	8.56	8.17	7.88	9.14	11.49	5.89	4.68	9.77	8.36	8.8	11.46	13.24	10.55	9.6	10.68
AT1G03930	21.13	24.47	18.88	20.33	26.77	24.55	23.93	21.07	24.9	25.81	23.47	20.22	22.65	23.14	17.68	22.22	27.99	24.99	28.5	26.24
AT1G03935	0	0	0	0	0	0	0	0	0	0	0	0	0	0	0	0	0	0	0	0
AT1G03940	0.17	0.08	0.09	0	0	0.05	0	0	0	0	0	0	0	0	0.08	0.07	0	0	0	0.07
AT1G03950	31.39	32.45	23.91	30.09	39.9	34.16	33.33	40.1	19.72	20.78	17.06	19	32.7	25.77	30.64	31.35	29.02	26.66	26.96	21.83
AT1G03960	2.78	2.7	4.73	6.39	3.72	3.46	5.57	5.73	6.77	7.2	9.02	8.82	7.32	8.05	7.31	7.78	4.7	4.86	4.18	5.01
AT1G03970	17.31	18.8	19.32	20.01	18.35	14.42	22.39	26.69	15.87	18.69	18.67	17.82	22.04	16.86	15.62	15.57	12.7	15.17	15.07	12.75
AT1G03980	0.43	0.15	0.11	0.45	0.45	0.37	0.2	0.39	0.22	0.18	0.36	0.49	0.47	0.3	0.24	0.35	0.37	0.39	0.18	0.23
AT1G03982	0	0	0	0	0	0	0	0	0	0	0	0	0	0	0	0	0	0	0	0
AT1G03990	0.22	0.1	0.17	0.17	0	0	0	0	0.13	0.23	0	0.17	0.91	1.88	0.8	0.99	0.19	0.13	0.19	0.14
AT1G04000	13.6	10.76	14.51	14.98	15.57	12.07	14.93	13.45	13.54	14.42	13.08	13.85	12.32	12.93	17.36	15.09	17.06	12.72	19.18	13.04
AT1G04010	5.68	5.43	5.08	6.61	7.56	6.42	6.41	5.17	10.84	9.15	8.86	7.32	8.53	7.01	6.47	7.22	7.79	6.32	7.27	5.83
AT1G04020	4.58	5	6.15	8.3	6.18	5.55	4.94	6.3	10.6	10.27	10.05	11.95	7.91	7.25	7.62	8.25	6.67	7.18	8.53	8.21
AT1G04030	5.07	6.79	5.95	6.45	7.58	8.88	8.83	9.27	8.71	12.03	6.98	7.57	12.18	10.25	9.04	9.6	13.91	13.64	15.38	14.79
AT1G04040	712.35	740.32	623.1	662.34	635.6	644.37	477.07	696.13	818.55	814.5	687.42	571.89	710.74	621.14	539.05	531.33	577.58	551	714.81	633.73
AT1G04050	1.55	1.98	2.17	2.71	2.01	2.13	2.76	3.38	4.01	4.12	5.18	4.3	2.76	3.69	3.35	4.05	1.91	1.95	2.19	1.58
AT1G04070	12.24	7.97	16.59	18.91	7.78	13.91	15.83	17.86	15.02	16.75	16.56	18.99	21.54	15.65	18.62	18.74	13.32	10.91	12.37	14.02
AT1G04080	19.18	30.21	38.38	41.63	33.05	32.57	41.91	39	45.75	48.19	59.43	64.83	50.82	56.31	44.39	60.59	38.96	33.6	37.26	35.39
AT1G04090	1.04	1.4	1.64	1.79	0.97	1.42	1.93	1.37	1.56	1.58	2.03	2.03	1.84	1.14	1.35	1.47	1.25	0.99	1.43	1.35
AT1G04100	5.62	6.37	9.93	9.94	9.45	5.87	12.14	8.03	6.35	6.83	8.76	6.96	4.5	4.63	5.17	3.85	5.39	4.33	4.85	6.51
AT1G04110	0.54	0.66	0.87	0.9	0.9	1.05	0.71	0.99	2.17	3.72	3.03	2.79	0.53	0.18	0.44	0.44	1.17	1.52	1.61	1.36
AT1G04120	21.25	22.47	23.32	33.78	30.05	28.81	37.89	28.4	36.32	36.41	37.87	35.54	42.84	36.51	31.48	39.85	30.36	27.97	30.39	32.74
AT1G04130	5.03	4.63	6.99	8.06	7.14	6.7	6.71	8.28	8.43	10.01	13.13	10.34	9.96	10.87	9.89	9.98	5.91	4.91	8.69	7.74
AT1G04140	41.54	47.7	38.99	49.43	55.09	49.84	52.91	40.69	55.7	54.31	52.42	53.99	59.33	54.21	49.38	58.85	56.24	49.4	50.66	55.23
AT1G04150	0	0.04	0.04	0	0	0.03	0	0.06	0.03	0.03	0.05	0	0	0	0	0	0	0.03	0	0
AT1G04160	4.94	6.87	5.56	8.84	6.58	6.72	7.68	6.86	9.51	8.95	10.79	10.08	10.26	7.61	7.91	8.28	5.77	5.28	5.72	6.48
AT1G04170	61.75	64.68	89.91	98.43	64.9	67.01	78.97	95.43	104.51	111.7	137.93	140.51	113.85	104.8	98.27	98.83	66.98	62.83	75.21	71.73
AT1G04171	0	0	0	0	0	0	0	0	0	0	0	0	0	0	0	0	0	0	0	0
AT1G04180	1.99	2.66	6.86	6.59	3.29	1.83	10.49	6.27	0.75	1.23	2.46	2.01	1.14	0.23	0.38	1.18	0.24	0.67	1.16	1.27
AT1G04190	22.17	23.25	32.89	35.79	26.32	26.69	29.93	39.39	34.6	40.65	43.2	43.22	49.03	43.76	43.52	41.44	26.64	25.76	32.97	27.31
AT1G04200	19.66	20	23.02	29.28	23.78	23.61	29.04	19.66	31.11	27.41	34.98	29.68	25.31	24.93	20.07	25.47	23.75	20.74	20.85	21.86
AT1G04210	11.65	13.09	13.6	18.48	17.39	14.13	19.97	18.21	19.57	20.12	23.99	25.74	20.57	18.38	17.14	22.18	15.76	13.93	16.99	16.06
AT1G04220	82.86	92.47	106.52	114.81	124.68	99.58	135.8	94.23	133.14	106.48	133.05	111.68	99.03	83.92	97.14	107.41	117.41	108.17	110.47	123.36
AT1G04230	6.89	8.18	9.23	11.23	9.16	7.56	9.85	10.87	9.47	12.32	8.54	8.68	10.31	9.5	10.45	8.95	7.9	8.12	8.92	7.86
AT1G04240	222.2	249.46	159.76	157.85	274.41	213.55	183.07	187.13	176.61	193.95	135.36	101.55	132.91	109.5	116.22	102.38	226.1	180.72	203.48	197.15
AT1G04250	714.63	781.56	614.26	588.23	808.14	659.5	704.44	707.99	539.76	563.04	505.11	386.46	404.27	342.43	327.69	343.42	570.17	523.71	630.51	599.39
AT1G04260	26.53	24.62	33.82	28.03	15.81	21.32	22.49	22.65	34.52	32.75	30.93	33.87	15.91	18.14	17.7	19.07	26.22	22.04	27.33	26.12
AT1G04270	323.36	347.5	436.07	495.46	235.6	315.74	281.37	653.15	436.08	514.9	589.37	631.28	464.68	500.83	447.07	451.26	264.34	288.67	388.89	323.89
AT1G04280	33.16	39.27	28.1	28.62	48.4	39.41	37.28	31.86	25.05	24.68	20.77	17.9	27.13	21.99	22.58	23.88	43.06	34.07	34.64	36.97
AT1G04290	29.5	36.16	32.57	31.61	24.65	27.87	19.09	36.27	29.51	36.78	24.07	25.26	22.94	26.78	28.24	28.05	24.01	22.29	25.73	23.36
AT1G04295	2.24	1.58	1.98	1.73	2.32	2.44	3.24	1.02	1.57	4	2.19	0.85	3.67	1.84	2.27	2.03	1.59	2.24	2.38	1.7
AT1G04300	17.76	22.54	23.73	27.46	23.74	21.45	30.71	29.83	24.92	27.05	33.77	30.41	36.42	33.79	25.15	33.5	24.36	21.7	19.65	24.91
AT1G04310	8.01	7.91	26.65	34.58	10.36	8.34	34.8	29.17	9.49	10.02	32.22	29.29	4.44	3.34	5.39	5.64	2.31	2.78	2.42	2.96
AT1G04320	0	0	0	0	0	0	0	0	0	0	0	0	0	0	0	0	0	0	0	0
AT1G04330	0.44	0.62	0.44	0.45	2.53	2.45	1.74	2.24	0.87	1.1	0.49	1.99	2.86	3.34	1.97	2.82	1.73	2.8	1.49	2.65
AT1G04340	55.43	51.64	49.44	55.74	44.96	48.22	40.63	60.26	64.36	71.27	60.59	58.77	57.83	60.67	53.26	56.22	43.64	48.37	54.92	50.22
AT1G04350	1.63	1.87	2.47	2.34	1.35	1.24	1.51	1.12	0.43	0.53	0.3	0.18	0	0	0.25	0.37	3.69	3.34	2.38	1.96
AT1G04360	3.04	3.97	2.42	4.18	7.31	4.94	4.95	3.36	4.84	4.63	3.91	3.54	6.93	5.44	5.5	7.52	13.56	11.23	10.17	11.17
AT1G04370	0	0	0	0	0	0	0	0	0	0	0	0	0.47	0	0	0	0	0	0	0
AT1G04380	0.21	0.19	0.1	0.32	0.34	0.06	0	0.08	0.17	0.17	0.23	0.31	0	0	0	0.08	0.35	0.25	0.44	0.09
AT1G04390	2.37	2.86	2.64	4.18	4.26	3.82	4.85	3.02	3.71	4.42	4.35	3.67	5.48	4.94	4.66	4.75	4.25	4.27	4.77	4.13
AT1G04400	67.89	75.22	86.91	97.71	95.97	79.79	102.49	90.35	77.7	82.88	90.56	84.68	68.01	64.95	60.68	64.18	82.58	68.84	74.52	79.13
AT1G04410	1404.55	1391.83	1517.47	1682.81	1288.75	1207.78	1414.41	1501.02	1425.6	1405.24	1698.59	1652.81	1339.63	1313.17	1335.29	1269.05	1241.94	1039.72	1295.35	1194.96
AT1G04420	13.3	19.43	28.55	29.12	20.13	24.52	26.79	32.44	27.08	43.13	39.31	54.98	22.32	25.73	19.57	28.4	31.15	33.34	35.98	32.49
AT1G04425	9.75	8.84	12.01	18.98	2.99	15.94	6.26	29.54	15.83	28.76	15.72	23.31	9.06	10.23	8.74	11.01	10.23	14.71	27.47	14.33
AT1G04430	72.45	80.11	78.04	103.68	77.99	84.3	69.42	92.73	132.41	130.07	118.94	109.27	94.83	93.15	75.39	87.29	63.1	66.29	82.27	77.83
AT1G04440	57.48	57.74	61.28	66.01	73.98	59.81	77.79	58.91	61.92	61.36	57.96	46.59	61.73	50.06	56.48	53.2	82	61.97	66.85	72
AT1G04445	0.3	0.29	0.92	0.31	0	0	0.44	0.22	0	0.51	0.34	0.31	0.33	0.33	0.27	0.24	0.69	0.49	0.77	1.05
AT1G04450	0.31	0.14	0	0.32	0	0	0	0.34	0	0.13	0	0	0	0	0	0	0	0	0	0.13
AT1G04457	0	0	0	0	0	0	0	0	0	0	0	0	0	0	0	0	0	0	0	0
AT1G04470	0	0	0.04	0	0	0	0.03	0	0.03	0.03	0	0.04	0	0	0.03	0.06	0	0.06	0	0.07
AT1G04480	170.39	169.93	212.26	255.09	122.23	170.84	164.64	258.92	212.58	243.16	252.41	321.3	189.39	232.01	205.99	238.58	129.87	173.99	210.88	155.27
AT1G04490	4.62	4.59	2.69	3.23	3.4	3.79	1.94	3.16	3.8	4.47	2.88	3.07	15.32	13.79	9.22	8.29	5.1	3.45	6.87	5.89
AT1G04500	0.08	0	0.08	0.08	0	0	0	0.12	0	0	0.18	0.16	0.35	0.18	0.29	0.26	0.18	0.13	0.14	0.28
AT1G04501	0	0	0	0	0	0	0	0	0	0	0	0	0	0	0	0	0	0	0	0
AT1G04510	19.53	20.77	32.71	37.99	23.2	25.45	30.44	31.47	35.09	35.58	49.57	54.6	39.51	38.72	34.83	39.34	27.19	26.23	29.45	27.1
AT1G04520	19.43	21.49	22.21	25.19	15.59	17.58	15.74	19.85	25.37	27.41	25.74	23.35	27.68	24.09	20.98	20.66	15.81	18.76	22.62	19.79
AT1G04530	26.23	29.23	34.66	38.08	30.44	33.16	34.65	45.2	27.17	32.88	32.44	36.49	37.27	32.69	28.7	33.12	30.66	28.43	29.6	31.8
AT1G04540	0.07	0.2	0.14	0.22	0	0.22	0.1	0.16	0.11	0.12	0	0	0.39	0.16	0.51	0.23	0.08	0	0.12	0.37
AT1G04550	14.27	16.31	14.17	17.86	17.52	17.27	18.5	25.78	17.42	19.33	17.97	19.49	21.59	18.77	20.53	21.55	26.32	20.59	22.06	21.42
AT1G04555	7.65	8.85	10.66	10	12.39	8.7	11.99	9.97	11.5	11.08	11.49	8.16	14.25	9.95	10.47	11.73	10.31	9.3	10.85	10.55
AT1G04560	62.32	63.05	35.84	41.57	6.77	11.43	5.34	15.55	42.93	93.33	47.79	57.56	541.28	541.66	369.15	402.56	21.34	41.6	65.49	31.47
AT1G04570	0.46	0.06	0.4	1.02	0.76	0.41	0.48	0.29	0.21	0.17	0.22	0.13	0.14	0.14	0.24	0.21	0.9	0.79	0.73	0.86
AT1G04580	0.09	0.08	0.18	0.22	0.15	0.09	0.15	0.15	0.19	0.13	0.23	0.42	0.16	0.23	0.22	0.22	0.07	0.12	0.1	0.16
AT1G04590	10.6	11.62	16.7	20.22	9.73	14.3	13.81	19.96	14.65	17.08	19.94	19.6	17.42	19.29	15.33	17.26	12.65	12.34	15.06	15.53
AT1G04600	0.05	0.13	0.05	0.1	0.16	0.18	0.12	0.21	0.28	0.24	0.4	0.4	0.54	0.28	0.32	0.59	0.16	0.23	0.1	0.2
AT1G04610	5.34	3.83	5.16	5.74	7.23	5.92	4.79	4.92	7.05	6.39	5.8	5.09	5.41	4.94	4.76	5.97	7.55	5.53	5.98	6.16
AT1G04620	9.84	14.84	26.38	23.92	17.44	19.88	26.38	20.68	20.15	28.12	30.69	29.11	15.36	18.48	12.01	16.98	26.53	25.44	24.33	23.79
AT1G04625	0	0	0	0	0	0	0	0	0	0	0	0	0	0	0	0	0	0	0	0
AT1G04630	56.4	64.64	68.48	74.82	58.71	68.41	67.94	85.36	79.05	69.77	77.85	78.7	57.44	59.62	70.08	68.42	74.96	65.51	78.11	69.75
AT1G04635	2.58	2.43	4.55	5.32	2.49	2.01	2.49	4.86	3.09	3.24	4.8	6.29	3.75	5.16	4.73	3.81	3.16	1.38	1.28	1.49
AT1G04640	7.3	6.13	12.29	10.4	7.95	9.09	7.85	14.26	14.91	18.25	19.88	20.67	13.95	9.39	9.96	10.63	9.31	10.31	10.82	9.13
AT1G04645	0	0	0	0	0	0	0	0	0	0	0	0	0	0	0	0	0	0	0	0
AT1G04650	0.56	0.76	0.93	1.04	0.93	0.78	0.99	0.97	1.06	1.45	1.48	2.28	1.23	1.85	1.57	1.63	0.55	0.87	0.96	0.94
AT1G04660	0.41	1.26	0	0.53	0.68	0.32	0.3	0.67	0.99	2.15	0.69	3.11	0.45	0.67	0.56	1.25	1.75	1.81	1.74	1.16
AT1G04670	0	0	0	0	0	0.13	0	0	0	0	0	0.21	0	0.23	0.38	0	0	0	0.18	0.18
AT1G04680	93.54	101.37	80.05	92.53	103.27	103.32	66.87	77.43	129.25	117.66	90.97	79.88	62.29	62.2	56.07	67.95	99.83	95.52	114.15	109.38
AT1G04684	0	0	0	0	0	0	0	0	0	0	0	0	0	0	0	0	0	0	0	0
AT1G04690	101.19	117.3	121.24	130.75	109.06	109.29	109.58	128.51	133.01	129.11	135.84	135.66	115.94	120.86	109.71	110.17	110.47	101.32	128.97	114.17
AT1G04700	2.35	3.4	3.14	5.67	3.46	4.14	5.13	5.67	3.38	3.08	3.9	4.65	4.64	3.4	4.46	3.65	2.41	2.12	2.72	2.04
AT1G04710	6.51	7.11	9.18	11.82	6.99	8.62	9.68	12.04	6.56	8.92	7.36	11.9	7.27	8.53	6.39	8.47	8.19	9.65	10.35	10.28
AT1G04720	0	0	0	0	0	0	0	0	0	0	0	0	0	0	0	0	0	0	0	0
AT1G04730	2.22	1.81	2.45	4.01	2.26	2.9	3.14	3.18	3.79	4.36	4.82	5.65	4.24	3.93	3.64	4.49	3.14	3.29	3.7	3.63
AT1G04750	128.69	134.26	150.66	159.01	141.33	135.6	134.19	130.72	159.26	156.14	157.87	153.62	147.04	149.86	136.07	140.82	141.69	126.62	147.94	140.44
AT1G04760	1.78	1.88	3.14	3.44	3.31	4.29	2.9	5.85	3.02	3.36	1.74	4.04	3.15	5.58	3.4	4.12	3.52	4.45	5.47	6.35
AT1G04770	18.03	17.26	24.85	27.28	22.89	21.12	25.24	37.37	24.83	31.02	29.18	26.71	35.46	33.58	30.5	31.46	22.94	24	23.02	21.83
AT1G04778	0.66	0.63	0.67	1.37	1.1	1.24	2.86	2.43	2.64	1.12	2.97	2.68	2.9	2.88	2.95	1.59	2.26	1.59	2.82	2.85
AT1G04780	18.82	19.35	21.9	28.55	26.73	21.41	27.74	28.83	25.72	28.48	26.15	25.32	25.26	20.58	20.29	24.41	21.78	18.95	20.87	23.14
AT1G04790	9.18	12	13.42	15.62	13.61	12.58	14.18	15.36	13.3	16.47	17.6	19.53	16.8	13.48	13.75	14.88	13.7	12.54	12.62	14.32
AT1G04800	7.42	9.67	11.72	7.12	20.61	11.23	14.17	3.69	7.45	12	8.85	10.03	1.65	2.94	5.17	4.48	24.42	11.74	16.58	16.47
AT1G04810	22.07	26.65	27.59	32.99	33.28	31.89	35.38	30.16	40.68	40.71	45.5	44.83	44.09	43.14	36.32	42.55	37.98	34.14	38.41	37.88
AT1G04820	1124.09	1213.21	962.87	1213.54	1056.22	1049.45	856.9	1035.39	1416.12	1325.32	1380.65	1318.84	1098.39	1128.29	1017.56	995.93	1165.48	1050.56	1269.79	1156.17
AT1G04830	19.87	26.46	22.45	23.3	28.69	22.99	24.41	20.7	23.68	25.33	21.83	19.97	27.6	28.97	22.99	24.44	29.11	24.43	30.34	25.38
AT1G04840	0.26	0.06	0.77	0.66	0.84	0.48	0.7	0.74	0.87	1.01	0.78	1.22	1.18	0.35	0.81	1.03	0	0.77	0.6	0.5
AT1G04850	97.98	118.84	124.54	140.44	109.43	107.76	107.23	177.99	113.79	125.58	127.37	128.5	134.22	141.92	113.87	121.48	117.07	101.25	119.77	112.93
AT1G04860	11.08	10.44	10.24	13.81	13.55	12.24	13.56	14.68	12.32	14.36	15.32	15.27	14	11.82	11.36	13.64	12.77	11.55	12.93	12.07
AT1G04870	10.63	11.4	17.48	21.89	10.03	13.7	15.39	24.22	20.62	22.14	32.15	33.78	27.19	25.37	26.44	21.88	13.34	14.02	14.9	14.93
AT1G04880	0.25	0.31	0.08	0.34	0	0.25	0.06	0.24	0.2	0.34	0.09	0.33	0	0.27	0.3	0.33	0.09	0.33	0.28	0.5
AT1G04890	0	0	0	0	0	0	0	0	0	0	0	0	0	0	0	0	0	0	0	0
AT1G04900	5.58	6.64	9.13	9.19	4.67	6.02	7.44	10.62	7.66	12	11.54	14.7	14	12.42	11.02	10.08	4.29	4.76	7.12	5.47
AT1G04910	34.92	39.63	43.42	48.53	41.89	41.24	42.23	48.19	47.75	54.13	52.04	46.21	55.38	47.98	41.8	46.39	36.33	36.27	42.15	38.77
AT1G04920	1.22	1.07	0.58	0.66	0.3	0.49	0.6	0.94	0.97	2.15	0.64	1.48	16.08	13.44	7.67	9.8	0.44	1.34	1.61	1.05
AT1G04930	2.11	4.43	3.94	3.93	3.48	2.56	4.29	4.61	4.25	3.61	5.49	6.18	4.48	4.6	3.81	3.64	3.06	2.57	3.83	3.13
AT1G04940	27.17	25.76	48.85	47.95	34.93	36.9	44.44	46.76	49.35	54.73	64.87	70.3	36.66	41.78	43.26	46.6	43.54	47.01	47.27	43.99
AT1G04945	1.19	2.16	3.37	4.19	2.1	3.06	3.94	3.52	4.6	4.31	6.24	6.24	5.78	4.85	5.51	5.99	2.42	2.54	2.3	2.78
AT1G04950	7.73	9.02	13.05	13.95	13.65	10.46	15.34	11.41	11.96	13.59	16.63	15.65	16.62	14.69	10.9	14.87	12.99	11.85	11.09	11.63
AT1G04960	31.01	31.42	28.15	31.88	38.81	35.09	34.18	35.14	32.43	32.2	26.45	24.93	27.13	27.17	27.9	28.82	40.19	37.37	37.65	38.86
AT1G04970	30.96	35.39	42.03	37.77	48.35	35.09	51.17	27.89	36.92	37.08	37.28	31	36.58	39.41	38.64	35.89	50.98	38.66	41.91	41.99
AT1G04980	19.4	20.52	10.42	16.88	19.51	26.04	9.1	22.81	29.41	30.61	21.65	19.65	32.83	31.05	26.13	31.77	24.51	22.26	29.71	24.68
AT1G04985	17.79	20.35	26.8	23.3	24.83	24.12	25.78	31.77	19.7	24.58	22.48	25.73	23.13	24.38	23.87	25.78	20.9	19.65	21.51	21.58
AT1G04990	36.55	41.22	37.36	45.98	43.62	43.22	42.7	45.83	46.33	43.83	47.21	38.48	46.95	45.32	43.06	46.85	38.73	34	43.48	37.89
AT1G05000	30.94	31.95	53.99	54.63	35.06	26.6	44.77	33.79	27.6	25.72	44.24	40.32	25.59	16.49	28.64	26.65	32.77	28.43	30.01	25.77
AT1G05010	96.19	110.97	900.29	731.87	113.08	83.18	985.32	721.61	54.89	57.93	622.44	449.19	15.35	18.24	27.6	32.18	34.84	24.6	25.71	26.15
AT1G05020	2.3	1.67	4.95	5.01	1.04	1.22	6.11	4.26	1.42	1.09	5.31	4.22	1.65	0.97	1.42	1.43	0.35	0.42	0.58	0.41
AT1G05030	3.04	3.74	4.81	5.51	5.73	4.1	5.04	4.32	4.22	4.6	5.81	5.18	4.72	5.06	3.4	4.32	4.5	4.35	4.41	4.44
AT1G05040	0	0	0.35	0	0	0	0	0	0	0	0	0	0	0	0	0	0	0	0	0
AT1G05055	8.64	8.94	10.46	11.42	9.37	8.97	9.81	9.6	8.57	10	8.57	10.83	11.02	9.43	9.85	9.79	8.09	6.57	11.02	10.8
AT1G05060	14.76	16.44	21.57	16.19	27.76	22.54	30.89	22.61	10.36	9.72	10.83	10.75	20.24	16.7	16.26	17.84	23.8	19.91	17.84	19.02
AT1G05061	0.26	0.12	0.39	0	0.21	0.57	0.38	0.47	0.1	0.76	0.29	0.52	0.28	0.43	0.23	0.73	0.29	0.1	0.55	0.11
AT1G05065	4.74	3.59	6.7	6.84	7.86	2.93	2.03	5.57	3.77	5.59	2.12	5.74	3.11	5.14	3.35	3.75	7.55	5.27	8.05	3.25
AT1G05070	16.08	17.36	23.41	26.41	11.83	17.64	18.45	25.31	24.77	25.58	32.52	24.73	20.66	24.84	20.08	24.63	14.95	19.49	20.38	20.64
AT1G05080	0	0	0	0	0	0	0	0	0	0.08	0	0	0	0	0	0	0	0	0	0
AT1G05085	0	0	0	0	0	0	0	0	0	0	0	0	0	0	0	0	0	0	0	0
AT1G05090	5.03	4.75	5.44	10.16	7.51	6.03	10.36	6.41	5.71	6.48	6.19	6.01	6.6	7.29	6.18	5.74	6.68	5.27	4.39	6.9
AT1G05100	2.4	2.55	0.84	0.86	3.1	3.64	1.36	1.37	2.25	2.18	0.7	0.84	5.34	3.76	3.48	4.71	5.32	5.18	5.39	5.32
AT1G05120	10.83	10.73	12.62	15.42	14.7	14.01	17.59	15.82	13.34	15.9	15.73	15.97	16.04	16.19	13.07	15.61	13.8	13.72	12.72	16.33
AT1G05135	13.6	17.85	22.75	17.82	25.09	29.32	28.49	13.26	31.07	26.18	27.79	26.41	10.99	11.68	16.24	16.77	18.43	18.57	16.95	19.89
AT1G05136	0	0	0	0	0	0	0	0	0	0	0	0	0	0	0	0	0	0	0	0
AT1G05140	9.77	10.48	15.23	16.12	20.42	15.24	19.94	17.45	10.42	14.1	12.35	16.13	16.57	13.03	13.07	12.46	18.97	15.37	16.05	15.48
AT1G05150	29.16	30.87	20.49	28.13	35.95	36.95	28.66	35.91	37.15	39.88	31	32.19	40.81	37.84	31.16	39.6	39.83	39.43	42.33	43.81
AT1G05160	2.14	2.64	4.63	4.29	3.54	3.28	4.24	3.53	3.52	5.43	5.33	4.94	8.07	4.88	4.43	5.84	2.91	3.53	4	3.5
AT1G05170	23.13	26.35	19.41	22.11	32.87	26.91	22.46	26.32	28.74	31.71	23.97	18.65	33.56	32.33	27.04	26.67	32.7	30.13	33.07	29.04
AT1G05180	19.65	21.91	23.68	29.06	25.82	22.44	24.69	23.67	27.36	30.13	33.94	33.63	31.64	26.93	25.55	28.02	23.89	24.15	25.72	27.81
AT1G05190	131.52	138.62	233.52	214.09	155.74	201.29	174.72	258.27	156.39	249.81	225.37	265.3	103.33	122.24	103.65	136.38	205.46	231.65	233.52	224.71
AT1G05200	0.8	1.22	1.38	1.46	1.01	1.48	1.56	1.17	1.88	2.33	1.88	1.58	1.41	2.21	1.24	2.07	2.07	2.04	1.52	2.05
AT1G05205	60.74	60.53	74.05	69.16	53.63	52.61	53.31	83.4	67.03	73.65	69.64	71.62	74.06	74.37	71.75	73.55	52.13	48.77	66.32	54.59
AT1G05210	18.01	21.99	17.76	22.38	13.8	21.03	12.36	19.23	28.29	25.48	23.01	23.4	16.18	22.28	24.73	22.57	21.22	18.12	20.62	19.57
AT1G05220	2.27	1.3	1.77	3.3	3.38	1.45	1.7	1.46	1.78	1.97	1.55	1.04	2.72	3.04	1.67	1.66	2.52	2.1	1.48	1.92
AT1G05230	8.23	9.36	4.78	5.71	11.22	8.68	5.62	4.55	12.72	13.54	6.73	7.57	6.88	7.81	6.8	7.39	21.34	13.59	15.87	15.54
AT1G05240	185.1	192.95	116.12	219.66	86.97	133.7	87.76	182.78	89.97	79.95	101.34	162.8	208.59	193.82	258.86	198.51	45.34	49.92	57.5	52.82
AT1G05250	0	0	1.73	1.85	0	0	3.07	0	0	0	0	0	1.77	2.19	4.99	1.44	0	1.61	0	0
AT1G05260	248.49	268.34	210.55	239.67	279.32	292.98	250.03	288.88	230.26	240.69	193.71	167.36	275.04	263.2	243.63	234.05	290.77	251.31	287.49	284.98
AT1G05270	25.24	32.54	34.68	37.74	35.89	37.23	36.06	32.64	34.92	35.8	38.45	35.31	41.53	33.29	32.21	37.67	29.18	29.03	36.28	36.11
AT1G05280	0.61	0.9	0.53	0.63	0.58	1.36	0.63	0.95	1.39	1.46	0.58	0.97	1.61	1.62	1.73	1.62	0.69	0.63	0.89	1.06
AT1G05290	0.12	0	0	0	0	0	0	0	0	0	0	0	0	0	0	0	0	0	0	0
AT1G05291	0	0	0	0	0	0	0	0	0	0	0	0	0	0	0	0	0	0	0	0
AT1G05300	4.98	5.13	2.02	2.96	4.58	3.4	2.8	1.4	6.42	4.84	3.85	3.57	5.84	5.75	4.62	5.52	6.93	5.06	5.27	5.25
AT1G05310	2.86	3.25	4.08	4.68	7.34	6.46	5.51	1.44	4.33	3.63	3.31	5.38	3.98	3.56	4.82	5.26	7.48	5.77	7.2	9.31
AT1G05320	44.33	49.42	31.81	41.52	42.89	39.98	27.77	35.8	45.21	48.42	33.82	31.91	49.77	41.06	38.7	45.44	52.82	50.45	54.51	57.64
AT1G05330	0.42	0.78	0.42	0.43	0.69	0.52	0	0.3	0	0	0	1.26	0.91	0.45	0	1	0.47	1.33	0.7	0.36
AT1G05340	15.33	15.18	17.5	10.11	21.95	16.28	14.33	9.54	15.82	17.45	10.72	6.6	16.47	12.48	11.4	10.36	20.81	16.35	16.46	18.36
AT1G05350	19.2	23.27	22.06	30.37	22.23	26	25.03	27.18	27.41	28.45	32.9	28.44	30.09	30.1	25.83	29.85	21.62	20.67	27.82	23.97
AT1G05360	11.8	11.97	11.09	14.9	15.36	15.09	11.28	9.85	20.03	22.75	15.61	14.9	23.48	23.13	19.93	19.8	16.97	14.58	16.63	17.24
AT1G05370	0.18	0.17	0.53	0.73	0.58	0.38	0.51	0.39	0.92	0.59	1.28	0.98	0.87	0.77	0.56	0.64	1.7	0.42	0.75	0.69
AT1G05380	11.81	11.94	12.08	15.88	16.23	14.63	17.81	15.45	14.74	16	17.12	16.95	16.62	15.66	12.34	16.74	15.73	15.57	15.43	17.1
AT1G05385	4.43	7.8	10.68	8.54	7.33	6.84	6.29	7.17	5.85	9.52	4.95	6.22	5.46	4.84	3.99	5.59	11.35	11.72	10.46	11.16
AT1G05390	0	0	0	0	0	0	0	0	0	0	0	0	0	0	0	0	0	0	0	0
AT1G05400	1.51	0.39	1.66	0.85	0.91	0.77	1.49	1.2	0.55	0.46	0.92	1.11	1.35	1.23	0.62	1.11	0.65	0.77	1.16	1.2
AT1G05410	7.18	6.19	7.76	9.83	6.86	7.1	6.82	8.85	6.89	6.68	9.32	9.53	9.25	9.37	7.69	9.14	8.39	6.64	8.24	8.51
AT1G05420	3.66	3.44	1.3	1.78	5.69	3.89	1.25	0.79	3.61	3.07	0.72	1.3	3.29	3.52	5.62	3.81	5.36	3.62	6.03	5.58
AT1G05430	29.6	29.37	36.85	37.7	34.62	29.51	37.57	41.31	36.51	36.04	39.29	35.11	32.51	33.01	27.73	33.07	38.66	31.52	35.97	36.8
AT1G05440	0.77	0.8	0.6	0.88	1.55	1.38	0.8	1.87	2.38	2.71	2.95	2.93	1.67	1.21	1.54	1.31	1.16	2.46	3.11	2.58
AT1G05450	4.22	6.58	2.96	2.59	4.99	3.38	1.82	1.59	2.27	3.37	1.12	0.68	5.66	5.49	7.1	7.49	5.12	6.57	7.68	8.28
AT1G05460	1.69	1.97	2.74	4.13	2.61	2.61	2.83	4.29	3.41	3.66	4.66	4.75	4.29	4.5	3.89	4.07	2.5	3.45	3.59	2.87
AT1G05470	1.63	2.05	3.23	4.12	4.53	4.35	4.73	4.98	4.38	6.22	6.02	4.93	5.32	4.68	5.05	5.82	6.63	5.74	5.48	7.09
AT1G05490	3.55	4.29	3.17	3.97	3.75	3.26	2.95	3.62	6.79	7.98	5.82	6.04	2.56	2.89	2.15	3.02	3.66	3.71	5.14	4.58
AT1G05500	37.78	40.87	39.62	48.07	47.07	45.2	45.17	48.08	46.75	51.26	55.36	47.41	48.81	49.56	41.04	43.41	45.92	42.15	47.05	46.41
AT1G05510	26.18	22.63	18.61	21.64	3.01	1.39	0.71	1.84	21.45	51.55	29.85	38.4	189.66	209.32	95.19	88.69	3.17	3.81	3.2	4.84
AT1G05520	28.58	33.37	38.22	45.37	34.51	33.85	39.1	38.24	53.93	49.1	62.38	62.3	51.62	47.2	45.8	48.73	37.48	34.19	37.16	40.5
AT1G05530	3.27	2.35	2.13	2.88	4.61	4.8	3	2.53	6.07	4.51	3.87	3.98	6.5	5.89	4.26	4.66	2.72	3.16	4.81	4.66
AT1G05540	0.1	0.1	0.21	0	0.35	0.33	0.23	0.3	0.5	0.26	0.35	0.21	0.23	0	0	0.42	0.59	0.08	0.27	1.16
AT1G05550	0	0	0	0	0	0	0.06	0	0.08	0	0	0	0	0	0.09	0	0	0	0	0
AT1G05560	4.39	5.23	4.19	4.93	2.85	4.4	2.22	5.09	3.32	5.18	3.77	5.58	11.87	13.11	11.52	9.69	6.3	9.3	7.42	7.4
AT1G05562	0.21	0.87	1.45	1.17	0.68	0.51	1.42	0.37	0.57	0.95	0.57	1.14	1.12	1.35	0.93	0.75	1.4	1.9	1.22	0.89
AT1G05570	48.95	50.41	26.07	37.93	65.25	51.78	49.15	30.78	59.16	53.39	37.43	35.09	50.87	41.83	42.34	55.7	55.9	45.91	48.81	54.91
AT1G05575	12.24	10.92	8.44	6.31	9.59	7.01	4.88	3.76	8.99	10.26	6.84	3.25	11.24	9.83	14.16	8.79	11.68	6.44	6.01	7.78
AT1G05577	0.09	0	0.17	0.09	0	0.05	0	0.06	0.21	0.15	0	0.26	0	0	0.08	0.28	0.2	0.21	0.22	0.15
AT1G05580	0	0	0	0	0	0	0	0	0	0	0	0	0	0	0	0	0	0	0	0
AT1G05590	8.71	8.68	11.71	13.89	11.42	12.67	11.73	12.86	17.81	16.61	15.37	14.31	14.67	13.48	14.23	11.99	13.89	10.99	14.46	13.62
AT1G05600	2.09	3.16	4.16	4.31	3.76	3.42	3.35	4	3.73	4.89	4.9	4.65	4.71	5.46	3.19	4.73	4.34	4.05	4.77	3.97
AT1G05610	0.27	0.17	0.27	0.09	1.03	0.33	0.45	0.26	0.29	0.22	0.6	0.09	0.19	0.29	0.32	0.43	0.81	0.29	0.23	0.46
AT1G05615	0	0	0	0	0	0	0	0	0	0	0	0	0	0	0	0	0	0	0	0
AT1G05620	92.52	100.19	64.16	74.4	82.63	93.81	53.58	75.51	121.34	111.72	90.01	90.3	147.28	136.3	124.16	133.7	101.98	99.57	112.2	100.63
AT1G05630	3.36	4.6	2.69	4.8	4.49	4.7	4.02	4.74	6.74	6.88	7.18	8.52	6.29	5.26	6.12	6.07	3.5	3.62	3.72	4.16
AT1G05640	2.24	2.17	3.29	4.13	1.68	2.4	2.81	4.01	3.2	3.13	2.88	3.09	4.07	4.01	3.07	3.24	1.85	2.56	2.59	2.71
AT1G05650	1.58	2.05	0.11	0.35	1.38	2.45	0.33	1.15	0.99	1.23	0.5	0.91	8.03	6.9	5.64	5.59	0.77	1.81	2.02	1.69
AT1G05660	11.18	12.16	0.8	2.56	13.35	20.04	3.68	2.72	10.9	10.59	2.65	2.96	25.04	23.6	14.63	16.9	10.6	11.39	12.53	13.15
AT1G05670	1.93	2.14	1.67	2.72	2.42	2.33	2.77	2.4	2.37	2.71	2.54	2.92	3.19	3.44	2.79	3.56	2.71	2.19	2.32	2.57
AT1G05675	0	0.08	0.09	0	0	0	0	0	0.07	0.22	0	0	0	0	0	0	0.1	0.21	0	0
AT1G05680	0.69	1.29	0.26	0.71	0.57	0.27	0.12	0.69	0.55	0.65	1.15	1.47	2.71	1.88	2.87	2.98	0.49	1.38	0.51	1.04
AT1G05690	0.62	0.66	0.78	0.56	0.77	0.58	1.07	0.34	0.56	0.52	0.96	0.31	1.19	1.28	0.77	0.57	1.06	0.44	0.46	0.27
AT1G05700	0.15	0.09	0.25	0.41	0.08	0	0	0.04	0	0.08	0.11	0.05	0.05	0	0	0	0.06	0.04	0	0
AT1G05710	23.11	26.02	32.46	26.94	26.23	18.41	29.38	30.33	22.1	18.91	25.01	20.69	14.97	10.29	16.51	15.19	27.94	20.45	22.03	18.76
AT1G05720	48.48	57.57	68.28	69.48	59.31	61.82	64.51	74.7	66.59	69.1	74.07	73.71	68.29	83.7	67.6	67.66	56.71	47.68	63.35	52.91
AT1G05730	1.17	0.77	0.59	0.72	0	0.29	0	0.43	1.03	0.98	1.18	1.66	1.15	1.02	1.16	0.85	0.4	0.56	0.3	0.41
AT1G05740	0	0	0	0	0	0	0	0	0	0	0.43	0	0.42	0	0	0	0	0	0	0
AT1G05750	0.42	0.8	0.74	0.99	0.64	0.91	0.92	0.84	1.11	1.48	1.38	1.79	1.18	1.39	1.33	1.74	0.7	0.83	0.72	0.73
AT1G05760	5.41	5.09	12.8	10.43	6.22	8.35	11.23	7.9	10.89	10.84	8.15	5.46	5.64	7.7	4.87	6.25	25.04	18.63	17.36	20.93
AT1G05770	1.54	2.35	3.3	2.58	4.13	2.52	2.53	1.4	3.07	4.03	2.15	1.55	3.15	3.57	3.12	1.7	3.05	3.85	5.22	3.66
AT1G05780	8.99	5.31	12.84	13.57	9.32	7.15	9.98	8.84	10.67	11.72	11.9	12.86	14.8	12.54	10.91	9.08	8.75	6.69	8.15	8.67
AT1G05785	26.54	20.5	22.97	21.13	26.29	23.25	21.68	12.54	23.13	21.74	16.19	17.94	35.02	28	27.14	21.53	33.54	22.7	27.39	24.92
AT1G05790	13.65	18.47	12.77	13.17	23.56	18.42	16.59	14.04	16.11	17.36	14.23	12.4	19.3	19.2	16.18	19.06	18.54	15.99	17.75	17.2
AT1G05800	0	0	0	0	0	0	0.07	0	0	0	0	0	0	0	0	0	0	0	0	0
AT1G05805	17.4	22.05	15.85	18.97	22.34	20.69	20.29	16.03	22.78	22.1	18.39	16.06	14.33	14.67	11.8	14.93	25.6	23.74	23.17	23.17
AT1G05810	68.63	76.03	80.22	74.39	62.07	56.73	57.58	56.38	56.88	55.87	62.23	59.66	31.79	34.22	40.02	34.28	63.76	50.7	62	59.05
AT1G05820	1.22	0.81	1.85	1.51	1.5	2.03	2.49	1.43	2.86	1.51	2.65	1.67	3.22	2.23	2.92	3.1	2.11	2.19	1.45	1.85
AT1G05830	5.31	6.62	6.97	10.04	8.69	8	12.06	8.62	7.21	8.23	8.19	9.99	8.17	8.09	5.59	8.72	8.49	8.3	7.41	9.85
AT1G05835	63.41	62.23	91.1	103.48	49.14	55.47	78	105.42	69.03	66.34	96.24	86.61	39.35	48.6	46.85	52.88	59.4	61.34	68.91	61.01
AT1G05840	17.04	19.65	25.18	23.2	22.1	20.37	27.59	15.52	16.46	16.67	18.76	16.26	21.94	22.76	18.96	18.42	24.08	17.61	20.44	21.58
AT1G05850	783.75	897.94	880.9	908.8	961.04	832.84	974.32	807.39	848.67	772.46	784.9	672.08	563.84	583.15	574.31	593.68	932.17	697.93	818.3	792.74
AT1G05860	6.95	8.02	11.81	9.39	8.27	8.79	13.21	12.2	7.45	8.57	10.93	9.76	10.66	8.95	8.63	11.2	9.14	9.76	9.65	7.58
AT1G05870	75.77	92.55	72.39	86.5	87.16	83.13	69.02	96.74	89.94	105.11	81.27	72.96	70.42	78.94	65.88	83.19	91.02	80.11	94.06	92.97
AT1G05880	0	0	0	0	0	0	0	0	0.06	0.06	0	0	0	0	0.07	0	0	0	0	0
AT1G05890	26.47	31.81	43.44	42.39	41.45	36.37	55.38	34.26	33.03	39.72	42.45	38.75	53.41	50.11	40.87	48.25	38.67	36.91	35.82	38.65
AT1G05894	0.44	0.58	0.71	0.81	0.29	0.82	0.19	1.02	0.21	0.59	0.68	0.53	1.91	0.96	0.87	1.13	0.4	0.28	0.37	0.23
AT1G05900	6.94	7.78	8.5	9.96	9.49	8.61	9.05	8.86	11.73	12.22	7.77	8.77	11.04	12.08	10.3	10.96	11.49	9.05	9.94	8.53
AT1G05910	5.3	6.53	6.72	9.52	8.33	7.83	9.19	9.06	7.91	8.17	9.37	9.45	7.71	7.09	6.74	9.18	9.39	8.51	9.08	9.76
AT1G05920	0	0	0	0	0	0	0	0	0	0	0	0	0	0	0	0	0	0	0	0
AT1G05925	0	0	0	0	0	0	0	0	0	0	0	0	0	0	0	0	0	0	0	0
AT1G05930	0	0	0.14	0	0	0	0	0	0	0	0	0	0	0	0	0	0	0	0	0
AT1G05940	18.17	17.62	18.82	22.02	22.13	21.42	27.42	13.67	23.38	21.32	24.44	25.5	18.79	21.35	23.09	22.01	26.02	22.73	22.61	24.15
AT1G05950	2.6	2.97	4.49	5.11	2.56	1.66	2.11	2.44	5.14	7.51	8.44	7.25	2.16	1.56	2.07	2.3	3.85	3.28	4.57	5.31
AT1G05960	30.09	31.08	30.19	39.38	35.76	31.71	36.61	31.01	39.69	40.73	47.67	45.52	38.84	34.25	31.21	36.77	33.27	28.29	31.05	31.47
AT1G05970	5.23	4.03	8.74	5.39	4.05	4.68	5.09	4.65	3.92	4.65	3.83	4.12	3.56	4.46	3.09	2.37	5.55	4.19	4.99	6.66
AT1G05980	0	0	0	0	0	0	0	0	0	0	0	0	0	0	0	0	0	0	0	0
AT1G05990	6.39	7.69	3.09	7.11	0.84	2.86	3.69	8.2	2.85	1.93	4.56	4.9	4.45	1.95	3.44	3.7	1.74	1.23	2.17	1.98
AT1G06000	27.5	27.54	17.55	22.51	34.74	35.07	22.02	36.91	39.85	38.95	31.7	31.39	49.81	50.94	46.34	51.74	34.98	38.21	45.16	37.8
AT1G06002	4.54	3.3	3.1	3.17	4.11	4.29	4.03	5.23	5.03	6.38	2.94	2.22	5.58	5.12	4.23	5.9	2.98	5.04	3.73	4.05
AT1G06010	13.91	13.53	18.53	20.17	14.03	15.11	15.52	12.73	16.74	13.23	14.74	14.98	20.3	23.65	20.14	17.45	20.28	11.31	12.2	14.64
AT1G06020	0	0	0.13	0	0	0	0	0.1	0	0	0	0	0	0	0.12	0.11	0	0	0	0.23
AT1G06030	0	0.28	0.16	0.2	0	0.09	0	0	0	0.12	0	0.3	0.32	0	0.12	0	0.48	0.24	0.25	0.13
AT1G06040	28.67	29.96	40.97	37.01	33.66	30.36	37.37	44.21	38.5	43.38	49.06	45.13	25.74	29.25	28.46	31.51	55.27	39.46	43.92	41.79
AT1G06050	7.17	8.75	6.49	6.33	8.96	6.95	7.72	7.39	6.78	8.65	5.6	5.57	8.92	6.82	7.02	6.77	10.3	8.12	10.24	9.56
AT1G06060	27.92	27.83	39.44	37.86	36.54	32.74	35.75	34.72	26.25	30.94	33.33	29.38	29.49	24.54	23.23	21.15	37.87	31.65	33.82	30.94
AT1G06070	11.84	13.67	21.73	20.98	14.53	13.15	21.59	20.66	16.8	19.64	24.92	26.68	20.41	19.73	16.08	16.88	14.99	13.12	12.68	12.41
AT1G06080	27.76	27.21	278.64	294.59	37.36	36.2	285.34	240.64	41.28	41.69	405.87	345.57	11.66	8.71	17.46	14.28	7.05	7.26	5.93	7.84
AT1G06090	49.99	53.77	49.64	51.5	66.12	87.32	55.65	41.33	43.37	39.87	41.12	39.96	65.31	49.71	56.16	55.22	59.19	57.99	61.09	77.13
AT1G06100	0	0.15	0	0	0	0	0	0.23	0	0	0.17	0	0.5	1.01	0.42	0.5	0	0	0	0
AT1G06110	38.49	40.77	51.9	51.57	50.94	41.69	64.53	44.41	41.02	44.93	50.76	43.27	68.8	69.08	51.73	58.59	46.63	40.95	43.77	43.26
AT1G06120	30.71	27.64	12.77	17.3	30.63	35.97	21.98	15.96	26.47	26.15	19.48	15.61	41.68	32.26	38.53	30.26	29.6	26.44	30.65	29.92
AT1G06130	15.2	16.71	28.34	23.49	18.9	15.07	20.53	20.5	18.43	18.58	22.62	23.88	23.87	26.39	18.09	17.17	21.71	15.57	14.94	16.22
AT1G06135	0	0	0	0	0.94	0	0.21	0.21	0	0.24	0	0.29	0	0	0	0.23	0.32	0	0.24	0.25
AT1G06137	0	0	0	0	0	0	0	0	0	0	0	0	0	0	0	0	1.68	0	0	0
AT1G06140	0.23	0.29	0.39	1.19	0.89	0.43	0.5	0.9	0.93	0.52	1.03	1.09	1.01	0.93	0.77	1.24	0.7	0.68	0.91	0.6
AT1G06148	0	0	0	0	0	0	0	0	0	0	0	0	0	0	0	0	0	0	0	0.14
AT1G06149	2.23	2.73	3.29	4.09	4.81	4.02	4.81	4.8	2.98	4.33	4.58	4.01	3.55	3.21	3.32	3.87	4.06	4.28	3.96	4.59
AT1G06150	3.46	3.8	4.54	5.53	5.93	5.24	6.88	6.45	4.06	5.96	6.48	5.71	4.97	5.32	4.12	5.75	5.58	6.1	5.25	6.85
AT1G06160	0.15	0	0.15	0.77	0	0	0.11	0.43	0.12	0.25	0.66	0.15	0.16	0	0.4	0.48	0	0	0	0
AT1G06170	0.08	0	0.25	0.26	0.28	0.1	0.24	0.3	0.07	0.21	0	0.08	0.09	0.18	0.3	0.27	0.38	0.27	0.21	0.15
AT1G06180	1.22	2.14	2.3	2.04	0.75	2.56	1.43	2.55	2.43	2.55	2.21	2.76	4.31	2.66	3.15	3.92	2.24	3.41	2.97	3.16
AT1G06190	16.63	20.64	30.72	32.36	20.57	25.65	25.62	39.68	30.11	43.68	45.38	56.79	26.93	23.8	24.26	33.95	23.84	31.42	35.14	31.29
AT1G06200	47.48	49.81	65.89	57.95	50.19	45.31	53.86	73.36	46.71	54.87	62.79	59.01	53.4	55.06	44.47	55.02	53.39	48.76	53.91	52.29
AT1G06210	30.62	32.71	39.68	41.1	34.17	36.06	38.63	56.76	35.01	42.81	42.01	39.45	48.44	43.26	34.69	37.03	31.53	28.87	32.39	34.24
AT1G06220	13.93	18.19	20.66	28.47	20.88	21.58	24.69	31.44	31.73	34.46	43.48	45.96	33.2	31.61	26.87	36.23	21.72	23.5	24.46	23.57
AT1G06225	0	0	0	0	0	0	0	0	0	0	0	0	0	0	0	0	0	0	0	0
AT1G06230	14.54	16.81	15.27	22.38	24.37	19.23	23.87	23.52	21.37	25.09	25.27	25.08	23.03	20.02	18.9	25.61	24.12	19.38	20.92	22.56
AT1G06240	2.48	3.21	4.13	6.51	3.38	2.71	3.96	3.11	6.07	6.5	5.62	7.32	6.23	6.42	5.63	5.58	5.41	4.04	4.85	3.84
AT1G06250	0	0	0.28	0.19	0	0.18	0.14	0.21	0.15	0.08	0.1	0	0	0.1	0.08	0.23	0	0	0.08	0.24
AT1G06260	0	0	0	0	0	0	0	0	0	0	0	0	0	0	0	0	0	0	0	0
AT1G06265	0.59	0.9	1.55	2.07	1.38	0.46	0.82	1.05	1.23	1.97	2.29	1.95	5.49	5.2	2.83	4.17	1.11	1.11	0.85	0.55
AT1G06270	1.54	1.77	2.07	2.12	2.27	1.5	2.36	1.88	3.49	3.44	4.12	5.02	7.56	8.43	6.51	7.34	2.23	1.99	2.54	2.08
AT1G06280	0	0	0	0	0	0	0	0	0	0	0	0	0	0	0	0	0	0	0	0
AT1G06290	82.23	92.14	100	118.24	87.06	98.33	96.57	120.48	132.9	143.85	165.11	193.51	148.88	146.73	153.06	167.2	81.65	86.06	94.72	91.39
AT1G06310	0.25	0.52	0.31	0.57	0.51	0.54	0.27	1.43	0.15	0.82	0.76	0.74	1	1.07	0.56	0.84	0.49	0.25	1.04	0.53
AT1G06320	2.65	3.95	9.13	8.2	4.02	2.2	4.16	7.25	4.58	6.85	13.08	13.6	1.2	1.93	3.58	3.56	2.75	1.06	3	1.34
AT1G06330	4.39	7.95	26.2	22.62	3.35	3.78	13.65	18.74	7.27	7.92	20.37	16.35	1.84	3.31	3.94	4.34	2.29	3.78	4.58	2.04
AT1G06340	1.58	1.3	1.59	3.46	1.63	0.61	0.86	0.86	1.42	1.65	1.1	1.99	1.08	0	0.53	0.48	2.01	0.95	0.34	1.88
AT1G06350	117.3	118.16	88.3	124.39	84.85	75.57	55.78	94.21	156.1	144.38	147.93	130.36	100.31	97.63	103.55	103.01	48.07	57.4	82.35	64.01
AT1G06360	58.85	73.15	62.78	63.04	93.34	100.85	67.33	79.84	95.52	109.88	75.58	75.92	94.66	103.29	94.42	115.87	115.45	105.34	113.95	106.71
AT1G06370	0.66	1.5	2.36	3.09	1.24	1.64	2.38	1.03	2.02	3.29	2.93	4.26	3.27	4.4	3.47	3.48	0.85	1.88	1.75	1.3
AT1G06380	7.81	6.79	9.32	14.75	6.69	9	10.58	14.33	10.15	10.77	14.69	15.75	12.28	12.78	10.3	11.89	7.52	5.44	9.07	6.5
AT1G06390	51.57	54.26	68.1	69.68	60.82	54.9	70.44	64.26	66.4	62.28	68.41	62.37	59.71	57.36	53.18	57.13	65.65	57.16	58.81	61.01
AT1G06400	101.67	125.96	108.21	101.92	117.26	108.01	106.77	123.2	95.79	106.95	95.22	88.94	108.03	117.88	84.08	95.49	118.11	99.4	118.73	105.87
AT1G06410	67.47	79.96	41.43	56.19	94.86	78.82	58.95	63.72	77.52	80.65	65.22	61.21	75.21	69.79	61.33	74.45	82.16	76.13	80.1	84.54
AT1G06420	1.86	2.12	1.47	2.74	1.1	1.74	0.87	7.66	2.02	2.45	1.61	2.46	2.17	1.16	2.16	2.25	1.63	1.92	2.03	2.18
AT1G06430	6.4	6.54	9.5	6.31	7.7	7.7	9.46	5.77	6.77	8.92	7.46	8.12	8.25	7.24	5.94	6.89	10.16	8.5	9.09	8.89
AT1G06440	0.7	0.36	1.09	1.43	0.26	0.58	0.79	0.9	0.99	1.29	2.85	2.26	1.6	2.03	1.96	1.94	0.26	0.62	0.59	0.67
AT1G06450	3.62	1.79	4.32	4.13	1.1	1.13	1.87	1.11	3.89	2.79	5.53	5.48	1.87	2.39	2.07	2.46	3.77	2.52	2.99	3.38
AT1G06460	2.39	2.76	5.58	3.25	4.31	4.6	4.73	2.69	3.73	4.36	4.13	5.04	2.01	2.73	3.04	4.38	4.55	5.92	4.42	4.61
AT1G06470	19.38	17.89	18.03	24.99	25.67	20.03	21.16	17.36	29.18	28.26	24.43	22.94	29.15	24.86	21.42	21.59	25.23	22.62	26.1	24.61
AT1G06475	1.4	5.53	2.54	1.44	3.7	5.57	3.44	2.66	6.03	7.74	2.19	4.24	8.54	9.46	5.78	9.45	6.02	2.69	5.22	8.7
AT1G06480	0	0	0	0	0	0	0	0	0	0	0	0	0	0	0	0	0	0	0	0
AT1G06490	0.75	0.98	0.91	1.32	1.35	1.63	2.04	1.48	2.33	2.27	2.21	1.99	2.51	1.94	1.79	2.93	2.93	2.27	2.37	2.74
AT1G06500	9.27	9.48	15.86	14.78	9.51	13.08	13.41	18.73	15.55	15.19	18.04	16.65	12.92	15.66	14.7	14.46	12.19	12.91	16.49	10.54
AT1G06510	7.14	5.83	10.97	9.65	8.12	8.09	9	9.05	9.25	12.15	15.42	12.75	10.97	12.14	9.72	9.25	9.93	10.5	9.73	12.25
AT1G06515	54.97	44.55	51.6	55.8	37.79	45.12	39.88	36.11	47.28	54.67	49.72	48.05	64.36	54.19	54.7	50.09	41.31	40.38	52.35	40.51
AT1G06520	0.51	1.38	0.32	0.33	0.32	0.16	0.05	0.05	1.79	1.61	0.21	0.39	2.16	1.89	1.39	1.6	2.68	2.36	1.84	2.44
AT1G06530	34.9	38.44	33.5	41.15	41.21	42.44	36.83	70.56	37.77	48.14	39.26	44.55	43.05	41.96	39.33	43.4	36.7	38.38	44.26	37.66
AT1G06540	0.42	0.4	0	1.31	0.7	1.31	0.91	1.85	1.68	1.77	0.94	0	2.76	2.3	0.38	1.35	0	1.01	0	0
AT1G06550	42.04	55.14	55.33	64.17	62.01	59.01	61.97	84.1	48.79	55.78	56.78	59.62	58.38	50.55	52.26	50.1	66	58.89	63.87	67.34
AT1G06560	1.95	2.95	4.56	5.51	4.26	3.29	4.38	5.41	5.57	7	8.14	8.88	5.2	4.81	5.06	6.09	2.2	3.88	3.95	3.84
AT1G06570	16.58	17.54	19.98	15.7	21.29	19.55	22.41	18.43	14.91	15.76	14.67	13.6	18.59	19.75	14.59	18.99	15.72	14.75	13.13	15.93
AT1G06580	1.37	0.52	1.25	1.73	0.92	0.89	1.44	0.59	1.14	1.4	1.25	1.69	1.15	1.69	1.51	1.7	0.98	1.24	1.79	1.88
AT1G06590	2.41	2.79	3.07	5.17	2.45	3.58	3.73	4.33	5.38	5.41	6.05	6.11	5.03	5.22	4.61	4.9	4.9	3.7	4.39	3.75
AT1G06610	0	0	0	0	0	0	0	0	0	0	0	0	0	0	0	0	0	0	0	0
AT1G06620	62.55	62.14	47.7	50.4	89.24	62.45	55.76	53.21	45.51	46.75	33.42	35.87	66.43	56.2	55.25	62.37	79.78	61.17	69.54	70.76
AT1G06630	10.94	11.87	14.36	17.74	13.83	11.14	17.11	12.81	15.46	18.01	17.12	15.43	20.31	19.59	15.39	17.23	13.39	12.14	13.91	14.82
AT1G06640	167	187.98	162.61	143.3	217.82	142.09	205.72	129.71	122.74	121.14	96.69	86.55	97.2	86.54	101.87	106.21	242.52	161.6	175.78	190.65
AT1G06645	1.12	2.2	1.33	2.41	2.02	1.52	1.48	1.41	1.87	2.64	2.16	2.67	1.77	2.67	2.02	2.71	2.99	2.2	2.76	2.64
AT1G06650	6.39	7.56	8.98	8.78	11.04	9.23	14.61	10.31	9.2	12.56	10.71	9.38	10.13	10.26	6.38	10.65	8.11	8.78	7.15	7.46
AT1G06660	2.21	2.36	1.84	3.38	1.39	2.42	1.11	3.78	3.47	3.57	3.15	3.85	2.49	3.83	2	2.52	2.85	3.18	3.55	3.96
AT1G06670	6.08	7.34	7.17	11.69	8.5	8.02	11.63	12.77	12.03	13.77	16.54	18.46	14.16	14.51	11.06	15.79	9.43	9.3	9.03	9.67
AT1G06680	99.73	128.9	239.27	158.67	198.74	180.96	222.35	184.79	118.13	173.91	150.53	173.27	31.74	48.44	48.45	69.86	336.21	264.67	253.91	240.42
AT1G06690	3.88	6.31	11.27	9.56	8.44	8.96	9.95	7.45	9.22	9.26	7.92	9.55	5.88	6.61	5.21	6.47	13.49	11.75	10.4	10.07
AT1G06700	99.4	111.28	106.88	101.69	114.06	107.36	107.44	96.76	99.43	106.64	83	80.11	102.98	105.94	89.27	96.62	125.53	111.37	117.78	117.36
AT1G06710	0.62	0.75	0.88	1.2	1.02	0.95	1.34	0.82	1.51	1.97	3.16	3.37	2.41	2.74	2.46	2.49	0.82	0.7	0.58	0.94
AT1G06720	3.32	3.4	6.1	7.85	3.58	4.24	6.07	9.64	6.95	8.18	11.98	13.05	9.07	8.66	6.95	10.56	3.48	4.02	4.79	4.72
AT1G06730	7.59	6.16	7.25	8.49	9	7.84	8.57	9.27	15.34	14.77	14.2	14.4	14.27	15.38	12.9	13.36	8.51	8.88	10.67	10.56
AT1G06740	0.8	0.73	1.65	1.4	1.12	1.27	2.01	1.04	1.01	0.97	1.25	1.57	1.72	1.91	1.62	1.96	1.54	1.32	1.15	2.06
AT1G06750	0.15	0	0.08	0	0	0	0.05	0.07	0	0	0	0	0.09	0	0	0.14	0.15	0	0	0.12
AT1G06760	164.95	194.4	213.56	200.66	226.35	199.86	198.87	214.81	205.01	217.4	191.2	189.97	212.85	205.74	182.13	207.2	215.88	192.93	234.09	201.82
AT1G06770	2.79	2.69	3.6	3.7	3.19	2.72	3.4	4.59	4	5.31	3.83	3.75	5.53	4.14	4.86	4.62	2.27	3	3.02	3.61
AT1G06780	14.82	16.58	21.57	24.5	20.54	20.42	28.77	24.57	23.4	22.19	22.53	20.92	22.01	19.58	19.96	21.24	16.59	16.35	18.87	19.27
AT1G06790	8.73	8.45	12.41	13.16	7.08	7.64	8.14	12.21	12.4	14.37	19.32	20	10.81	13.15	11.56	12.28	6.78	10.01	10.47	9.76
AT1G06800	14.74	16.54	15.37	15.93	26.42	17.14	21.32	16.88	21.12	19.15	20.77	15.64	19.38	17.91	16.51	18.79	18.6	14.37	16.17	16.46
AT1G06810	0.25	0	0	0.26	0	0	0	0	0	0	0	0	0	0.27	0	0	0	0	0.21	0
AT1G06820	10.02	14.75	17.35	18.48	12.86	15.75	18.25	18.88	15.44	19.7	18.31	21.05	16.19	15.62	14.48	17.94	16.46	18.97	16.23	16.46
AT1G06830	0.32	0.59	0.64	0.97	1.56	0.59	0	0.23	1.01	1.06	1.41	2.54	0	1.03	1.7	2.03	0.36	0.76	0.8	0.54
AT1G06840	17.74	20.77	17.94	19.15	31.7	26.82	27.35	16.28	26.58	23.79	21.98	21.8	21.52	19.42	19.69	21.12	29.69	24.28	26.82	27.55
AT1G06850	31.44	35.88	20.17	23.1	34.07	28.44	25.6	20.34	39.18	35.58	24.97	24.78	27.58	32.59	26.85	33.75	38.57	27.46	34.89	33.34
AT1G06860	0	0	0	0	0	0	0	0	0	0	0	0	0	0	0	0	0	0	0	0
AT1G06870	19.07	18.42	16.04	18.78	21.38	20.52	16.78	18.36	24.77	26.95	20.95	22.25	25.2	23.08	24.42	23.93	22.09	18.95	21.75	21.8
AT1G06880	0	0	0	0	0	0	0	0	0	0	0	0	0	0	0	0	0	0	0	0
AT1G06890	81.14	75.68	78.95	92.8	73.11	74.27	70.25	55.53	103.04	88.26	98.21	92.07	86.92	80.6	72.7	77.22	84	78.16	87.36	85.54
AT1G06900	13.06	12.95	19.26	23.72	17.24	16.59	20.54	21.94	22.98	25.4	29.55	32.54	29.93	28.17	22.83	27.42	18.13	16.99	16.06	20.12
AT1G06910	1.96	2.08	3.09	3.78	3.24	3.08	3.34	5.16	4.02	4.64	4.95	4.73	4.64	4.28	3.47	5.16	3.09	2.39	3.98	3.25
AT1G06920	0	0	0.15	0.45	0	0	0.21	0.42	0	0	0.32	0	0	0	0.26	0	0.16	0.23	0.12	0
AT1G06923	8.57	6.52	5.24	8.38	3.58	3.18	3.85	6.33	3.29	2.54	2.91	5.36	7.32	5.21	7.24	4.9	1.6	2.17	2.12	3
AT1G06925	0.39	0	1.57	0	0	0	0.28	0.29	0	0.33	0	0.39	0.43	0	0	0	0.44	0.62	0.33	0
AT1G06930	6.01	5.03	8.68	6.6	6.26	8.14	7.01	5.81	6.67	4.81	4.67	5.65	7.26	6.13	4.71	5.06	2.36	3.77	4.21	4.97
AT1G06950	23.63	26.17	39.95	51.71	35.42	43.44	46.13	53.22	63.34	78.46	86.18	105.42	49.6	54.04	43.45	64.88	41.21	49.29	49.88	51.29
AT1G06960	12.16	14	18.3	19.81	15.22	15.85	17.78	20.67	17.95	20.27	19.08	18.5	22.75	20.86	16.97	20.66	20.76	13.63	16.33	18.82
AT1G06970	0.51	0.52	0.25	0.21	0.25	0.25	0.33	0.07	0.33	0.25	0.17	0.31	0.06	0.33	0.25	0.25	0.06	0.2	0.09	0.22
AT1G06980	66.88	73.35	21.19	18.15	81.67	63.78	21.87	21.76	61.11	62.45	19.07	16.13	52.87	52.56	49.87	51.98	70.16	73.79	88.25	85.29
AT1G06990	0.11	0	0	0	0	0	0	0	0	0.09	0.12	0.11	0.12	0	0	0	0	0	0	0.09
AT1G07000	15.5	17.4	14.4	15.71	19.56	14.52	21.26	14.14	17.1	12.75	16.87	13.35	11.04	9.22	11.15	11.8	12.82	11.66	13.24	12.15
AT1G07010	2.53	3.22	4.69	5.05	4.32	3.2	5.04	5.68	4.46	6.3	6.72	7.2	2.5	1.47	1.38	2.79	7.17	5.97	5.73	6.29
AT1G07020	46.9	49.23	55.82	56.2	39.99	47.13	47.03	77.03	46.12	48.59	48.48	41.15	53.95	41.64	45.73	40.02	39.01	42.57	46.61	44.09
AT1G07025	0	0	0	0.33	0	0	0	0	0	0	0	0	0	0	0	0	0	0	0	0
AT1G07030	13.54	15.05	17.29	23.89	16.37	15.82	18.49	20.83	16.67	18.28	19.06	24.28	21.39	21.26	22.45	23.92	16.21	13.89	18.68	15.77
AT1G07040	27	30.36	30.61	30.2	30.7	28.35	34.8	20.97	30.85	29.03	29.96	23.73	30.65	25.86	25.71	26.27	24.25	20.64	21.97	26.76
AT1G07050	1.35	0.79	2.04	1.39	1.68	1.16	2.57	1.48	1.48	3.11	1.32	1.71	0.18	0.37	0.46	0.41	1.91	2.98	2.44	2.63
AT1G07051	0	0	0	0	0	0	0	0	0	0	0	0	0	0	0	0	0	0	0	0
AT1G07060	0.2	0.19	0	0.41	0	0	0.71	0.86	0.47	0.49	0.66	0.4	1.07	0.86	0.89	0.48	0.22	0.16	0.5	0
AT1G07070	27.96	29.8	40.5	31.27	24.2	27.17	19.05	51.29	40.35	48.39	39.55	57.25	51.06	45.86	42.1	46.87	27.73	26.61	36.35	30.11
AT1G07080	149.44	160.18	148.84	137.4	169.79	144.4	162.26	126.01	129.52	126.4	105.47	109.47	258.71	267.97	193.09	194.4	189.16	153.42	165.67	158.69
AT1G07090	63.65	67.12	62.31	50.21	85.08	52.75	69.12	62.63	48.98	48	37.41	29.96	37.93	35.45	36.94	38.21	70.19	46.38	55.7	53.38
AT1G07100	0	0	0	0	0	0	0	0	0	0	0	0	0	0	0	0	0	0	0	0
AT1G07110	16.03	20.06	26.63	28.01	25.07	23.97	30.6	26.04	25.3	27.32	30.26	30.43	26.79	26.16	23.2	29.93	27.08	25.46	26.5	27.38
AT1G07119	2.26	2.33	2.04	4.42	0.75	1.68	3.59	2.47	1.62	2.46	3.78	3.18	4.67	1.48	2.64	3.08	3.06	3.07	1.72	2.92
AT1G07120	0.31	0.38	0.93	0.11	0.51	0.32	0.89	0.82	0.25	0.34	0.34	0.1	0.56	0.22	0.37	0.58	0.58	0.41	1.04	0.8
AT1G07128	1.43	1	1.44	1.47	2.94	2	2.19	1.82	1	1.34	1.39	2.16	2.72	2.33	3.85	3.44	1.81	1.85	0.91	1.08
AT1G07130	3.02	3.24	3.91	4.44	2.61	3.67	3.23	3.46	2.64	3.01	2.25	3.48	3.91	4.39	2.33	4.4	6.18	4.26	3.9	3.6
AT1G07135	11.24	10.76	8.94	8.33	8.8	9.33	11.99	5.18	13.85	10.24	6.39	7.76	3.65	6.03	7.64	6.19	7.37	9.63	12.38	11.08
AT1G07140	241.68	258.23	226.06	265.12	230.78	239.09	212.97	293.97	259.06	271.95	257.98	239.73	218.9	217.8	201.48	211.83	221.33	209.07	274.18	249.3
AT1G07150	8.16	8.39	7.87	8.14	6.24	6.69	8.47	10.02	5.9	6.32	7.38	7.71	3.55	2.44	5.12	5.27	5.24	3.78	6.26	4.98
AT1G07160	0.63	1.18	0.72	0.74	0.74	0.17	0.52	0.85	0.64	1.5	0.9	1.08	0.2	0.2	0.65	0.22	0.1	0.22	0.08	0.16
AT1G07170	23.33	26.15	38.39	33.38	23.17	20.17	30.47	34.19	23.8	32.67	32.45	32.67	26.66	27.84	21.56	25.65	26.84	18.58	24.64	23.64
AT1G07175	5.05	8.74	5.95	9.54	6.97	6.25	4.81	8.64	5.35	7.08	5.65	1.7	18.39	8.21	22.33	15.36	0	4.01	2.14	4.33
AT1G07180	0.22	0.54	0.22	0.22	0	0	0.05	0	0.29	0.3	0.16	0.22	0.94	0.71	0.39	0.58	0	0.12	0	0
AT1G07190	0	0	0	0	0	0	0	0	0	0	0	0	0	0	0	0	0	0	0	0
AT1G07200	7.41	9.24	9.7	10.21	13.1	11.18	14.73	12.27	10.51	11	11.53	9.86	10.23	10.83	10.09	10.5	12.77	8.99	10	11.82
AT1G07210	23.78	27.38	35.41	42.1	23.05	27.39	26.18	49.8	36.18	40.53	54.71	52.58	38.78	37.29	35.16	34.21	22.98	28.51	27.25	27.03
AT1G07220	5.54	6.5	10.34	12.54	6.5	8.62	7.72	8.12	6.86	7.56	10	10.14	8.88	9.07	6.38	7.88	6.59	7	6.86	7.63
AT1G07230	26.93	30.98	30.5	33.53	38.34	29.74	47.42	29.11	28.5	29.8	29.5	25.6	36.31	32.58	26.23	26.48	33.8	24.14	25.13	29.6
AT1G07240	28.35	31.03	34.07	31.85	39.46	30	42.68	36.8	26.78	27.63	30.26	24.85	26.5	23.46	22.58	27.02	31.48	26.96	25.59	26.18
AT1G07250	22.19	21.79	23.28	23.34	28.83	26.87	29.66	24.93	25.58	24.47	25.72	25.27	24.5	23.38	23.46	24.3	19.21	20.01	20.26	22.96
AT1G07260	7.62	6.74	8.28	9.62	8.02	9.22	9.27	11.65	9.55	10.19	10.51	10.85	10.33	10.36	10	10.74	9.46	8.62	9.37	8.21
AT1G07270	0.6	0.73	0.43	0.97	0.85	1.07	0.81	1.06	1.03	0.79	1.44	1.3	1.5	1.69	1.47	1.11	1.07	1.17	0.95	0.89
AT1G07280	5.33	5.1	8.94	11.48	4.25	4.56	6.31	7.53	5.97	6.35	11.68	11.41	6.45	7.16	4.86	6.47	3.32	4.07	4.83	3.93
AT1G07290	2.56	1.53	3.04	3.35	2.3	2.75	3.45	3.05	4.45	5.35	4.41	5.16	8.22	4.69	7.76	5.62	2.63	2.14	3.32	1.91
AT1G07300	3.93	3.51	4.55	3.64	4.22	4.03	6.54	3.58	4.39	3.45	7.45	4.75	6.63	5.14	4.95	6.32	6	4.08	3.66	4.41
AT1G07310	32.07	33.35	30.39	32.77	40.17	35.41	42.67	29.35	33.78	30	32.99	29.17	27.66	30.5	33.7	36.06	38.92	28.72	30.78	31.8
AT1G07320	68.33	83.09	136.53	132.68	98.92	116.13	112.77	144.43	109.18	158.04	147.93	189.2	71.15	78.49	71.82	98.65	147.71	167.82	168.63	151.54
AT1G07330	0	0.12	0	0	0	0	0	0	0.05	0.05	0	0.06	0	0	0.06	0	0.07	0	0	0
AT1G07340	0	0	0	0	0	0	0	0	0	0	0	0	0	0	0	0	0	0	0	0
AT1G07350	33.21	44.15	51.66	59.42	52.21	39.49	56.72	52.07	55.48	55.4	58.92	58.02	56.95	57.59	55.34	59.63	46.57	46.37	52.65	46.61
AT1G07360	30.21	35	40.13	44.06	40.67	37.83	41.18	42.53	42.81	42.1	51.83	55.01	37.81	41.01	42.55	45.37	35.45	34.44	39.49	35.6
AT1G07370	19.55	19.12	27.86	27.27	12.3	18.05	16.29	29.96	30.89	35.05	37.86	41.71	24.48	25.84	26.15	25.41	16.7	19.7	29.54	21.85
AT1G07380	11.34	12.43	13.81	16.41	16.23	15.21	18.15	17.04	13.11	14.36	14.89	13.13	15.81	15.69	11.67	15.01	14.04	11.64	15.29	15.47
AT1G07390	0.44	0.14	0.73	1.06	0.87	0.45	1.3	0.51	0.45	0.74	1.26	1.46	0.62	0.9	0.77	0.62	0.46	0.22	0.34	0.2
AT1G07400	0.52	2.12	1.92	1.61	0.57	1.19	0.63	1.64	1.52	2.47	1.93	1.92	2.64	1.89	2.34	2.37	0.98	1.25	1.32	0.45
AT1G07410	16.35	16.44	14.93	16.25	16.33	15.14	14.14	16.36	21.08	18.46	19.74	15.54	26.5	24.67	20.97	20.05	15.05	15.21	16.28	15.11
AT1G07420	62.36	62.67	47.76	55.77	77.07	61.93	54.69	29.02	76.13	72.19	58.36	47.26	66.7	62.32	57.5	58.95	93.99	69.75	77.97	83.31
AT1G07430	1.56	2.66	1.92	3.64	1.75	1.67	3.85	4.28	2.09	4.2	5.13	3.78	13.32	12.35	9.58	11.42	2.88	2.55	3.42	3.43
AT1G07440	8.25	10.48	21.82	18.2	0.22	0.93	1.68	2.05	2.93	4.44	6.87	9.05	0	0.15	0.37	0.11	11.08	10.45	9.49	8.97
AT1G07450	0	0	0	0	0	0	0	0	0	0	0	0	0	0	0	0	0.16	0	0	0
AT1G07460	0	0	0	0	0	0.23	0	0	0	0	0	0	1	0.6	0.83	0.3	0.21	0.73	0.47	0.32
AT1G07470	28.52	32.85	34.95	36.77	39.34	40.07	37.7	41.55	40.55	41.44	39.51	41.33	40.2	38.53	29.58	35.34	40.29	36.2	39.56	37.09
AT1G07473	0.3	0.42	0.15	0.15	0	0	0	0	0	0.13	0	0	0	0.33	0.41	0.12	0.17	0	0.13	0
AT1G07476	0	0	0	0	0	0	0	0	0	0	0	0	0	0	0	0	0	0	0	0
AT1G07480	15.68	15.3	18.7	18.38	22.95	21.03	22.22	19.31	20.4	21.73	19.13	19.66	19.25	19.55	16.23	19.53	20.01	22.51	19.46	23.04
AT1G07485	0.67	0.42	1.12	0.92	0	0.42	0.81	1.14	0	0.19	0	0	0.24	0.49	0.8	0	0.5	0.54	0	0.58
AT1G07490	2.55	3.7	3.27	3.82	1.53	2.31	3.35	1.86	2.59	3.69	3.36	3.04	1.26	2.27	1.25	1.49	2.62	2.22	3.93	1
AT1G07500	0	0	0	0	0	0	0	0	0	1.02	0	0	0	2.61	3.17	1.9	0	0	0	0
AT1G07510	10.97	12.79	14.23	14.35	16.83	14.25	17.95	15.14	17.11	17.48	20.7	19.53	18.42	16.47	15.88	19.83	17.92	14.62	14.45	15.02
AT1G07520	7.63	8.28	10.3	10.48	13.06	10.42	13.82	11.65	10.29	10.87	13.75	9.69	12.18	10.24	9.45	9.08	9.65	8.59	9.24	9.49
AT1G07530	14.02	15.7	14.93	19.4	19.59	16.68	21.1	16.33	16.04	17.4	19.71	17.14	24.26	22.87	16.78	20.58	16.2	15.19	16.91	17.15
AT1G07540	0	0	0	0	0	0	0.05	0	0	0	0	0	0	0	0	0	0	0	0	0
AT1G07550	0	0.04	0	0.05	0	0.03	0.03	0	0.04	0.19	0	0	0.1	0.05	0.04	0.08	0.11	0.04	0	0.12
AT1G07560	1.34	2.21	1.06	2.08	1.66	1.29	2.86	0.59	2.22	2.41	1.98	1.79	2.77	2.52	2.13	2.37	3.85	2.69	2.44	2.41
AT1G07570	20.22	23.58	37.77	38.98	23.55	20.94	37.36	36.57	21.06	22.56	31.02	27.28	15.63	16.68	13.32	15.17	22.84	18.84	22.58	18.97
AT1G07580	0	0	0	0	0	0	0	0	0	0	0	0	0	0	0	0	0	0	0	0
AT1G07590	319.96	327.81	241.61	238.99	258.58	228.04	211.03	258.72	229.42	262.15	172.66	152.98	345.55	293.91	403.63	333.22	256.25	228.81	220.4	261.24
AT1G07600	3408.44	3261.41	1737.62	1732.9	2064.2	2725.07	2164.54	2791.26	1932.37	2086.68	1364.75	1224.73	2260.1	2266.58	2342.93	3487.68	1728.14	1894.83	2114.54	2052.04
AT1G07610	193.94	192.74	98.99	111.64	94.34	118.74	62.52	134.5	99.04	138.33	65.35	81.23	199.22	175.82	299.36	242.45	126.82	128.05	128.32	147.63
AT1G07615	3.02	4.03	5.92	6.54	2.75	3.96	5.07	9.55	4.69	5.91	8.42	8.49	7.78	7.98	6.17	8.33	2.15	4.51	2.89	3.98
AT1G07620	1.61	2.1	3.06	3.07	0.92	0.81	1.13	2.62	3.02	3.74	4.5	5.01	2.97	2.51	3.25	4.81	2.24	2.63	2.31	2.63
AT1G07630	15.53	17.43	17.65	23.02	19.83	18.94	22.92	22.59	18.44	20.77	22.16	18.66	28.09	21.51	19.31	21.11	21.96	17.17	18.44	20.23
AT1G07640	6.95	7.45	11.16	10.48	11.75	12.28	16.38	14.58	13.21	11.68	13.94	12.05	12.11	9.43	13.46	13.7	13.92	14.01	13.96	15.86
AT1G07645	12.22	10.82	7.25	7.9	2.77	2.24	0.69	2.97	7.45	9.83	9.1	8.94	49.6	60.08	32.53	32.56	0.81	2.3	1.83	2.28
AT1G07650	23.3	28	24.87	27.31	40.58	29.62	40.53	22.37	24.76	24.42	20.24	16.05	17.73	16.93	15.37	18.16	34.23	23.37	28.73	29.03
AT1G07660	32.98	39.3	38.05	43.05	33.33	33.59	36.07	54.69	41.44	48.05	47.27	43.56	42.51	35.72	35.68	39.5	33.41	31.62	37.49	37.26
AT1G07670	26.46	29.42	37.76	49.82	34.78	38.94	42.72	48.34	51.89	55.59	64.38	61.37	47.77	43	40.7	50.66	32.95	34.13	39.38	37.72
AT1G07680	0	0	0	0.43	0	0	0	0	0	0	0	0	0	0	0	0	0	0	0	0
AT1G07690	17.61	19.02	27.06	21.42	9.07	13.29	12.93	27.4	17.61	25.88	29.67	27.96	16.36	28.01	46.84	46.22	23.54	26.77	30.36	21.68
AT1G07700	6.27	5.09	9.91	10.52	7.58	6.63	7.89	8.88	7.51	8.21	8.49	9.8	4.07	5.64	5.41	6.47	9.99	7.23	7.13	10.74
AT1G07702	0	0	0	0	0	0	0	0	0	0	0	0	0	0	0	0	0	0	0	0
AT1G07705	9.69	8.02	11.61	15.65	12.08	12.39	13.96	12.77	19.95	19.38	23.03	22.21	18.63	15.5	15.44	14.07	13.72	13.49	15.55	16.47
AT1G07710	0.71	1.04	1.52	1.39	1.05	0.89	0.98	1.5	1.96	1.53	2.04	1.44	1.82	1.47	2.44	1.6	1.08	1.08	1.01	1.51
AT1G07720	96.11	116.21	67.21	69	183.51	123.62	100.91	55.87	125.82	105.65	60.86	47.79	95.16	84.73	85.49	81.34	157.81	117.24	134.79	134.48
AT1G07725	0.1	0.14	0.1	0.16	0.08	0.03	0.07	0.11	0.04	0	0.06	0.1	0	0.11	0.05	0.04	0.29	0.08	0.09	0.04
AT1G07728	10.9	11.22	13.36	15.02	14.28	12.34	15.96	12.31	11.71	11.72	13.16	13.33	11.32	15.11	9.85	12.09	11.96	10.87	10.67	10.61
AT1G07730	21.93	20.6	13.62	14.98	24.32	21.83	16.98	14.16	16.25	18.68	11.27	13.59	11.51	17.64	19.52	18.66	22.25	23.54	21.39	23.85
AT1G07740	1.72	1.98	1.66	3.12	2.14	2.56	2.73	3.52	2.53	2.37	2.1	3.21	4.25	2.52	3.25	4.5	2.9	2.51	2.55	2.58
AT1G07745	3.4	3.63	4.4	5.48	3.19	2.03	4.54	3.77	2.85	3.93	4.32	3.75	6.78	5.59	4.22	4.23	3.2	3.8	3.86	3.67
AT1G07747	0	0	0	0	0	0	0	0	0	0	0	0	0	0	0	0	0	0	0	0
AT1G07750	127.95	152.3	73.56	82.44	137.06	129.78	80.45	69.34	112.94	100.28	70.46	57.1	134.73	118.29	105.92	86.73	173.79	141.33	165.01	160.34
AT1G07760	0	0	0	0	0	0	0	0	0	0	0	0	0	0	0	0	0	0	0	0
AT1G07770	351.07	330.83	452.59	426.3	259.17	286.65	298.51	490.01	348.74	392.65	426.9	452.61	336.35	362.03	306.2	333.01	265.83	290.35	336.57	284.73
AT1G07780	10.58	11.06	18.4	22.95	13.28	14.87	16.57	16.24	14.24	16.37	22.29	23.54	15.95	15.13	14.39	17.8	13.06	14.5	17.24	14.38
AT1G07790	51.75	62.07	55.74	74.36	44.22	59.47	43.76	110.91	71.5	92.12	89.65	100.38	81.21	76.56	71.57	71.49	62.37	58.53	77.83	59.27
AT1G07795	2.8	2.43	2.82	3.54	1.78	2.68	1.24	2.35	1.37	1.44	0.96	1.73	5.62	3.99	4.45	3.11	2.19	1.55	2.92	3.9
AT1G07800	0	0.14	0	0	0	0	0	0	0	0	0	0	0	0	0	0	0	0	0	0
AT1G07810	19.06	23.57	22.65	31.42	24.33	26.76	30.19	27.82	36.49	36.54	37.3	37.31	32.21	31.58	31.26	34.93	26.53	24.82	27.28	30.82
AT1G07820	152.99	166.99	193.8	221.18	127.9	168.11	133.9	297.9	184.75	225.65	206.22	211.43	205.31	206.8	179.07	175.92	144.66	146.68	180.78	161.79
AT1G07830	14.37	15.06	22.62	26.71	12.28	14.9	14.23	28.3	17.53	23.36	30.42	31.98	39.57	43.06	30.8	34.72	15.13	15.59	17.5	15.98
AT1G07840	10.1	9.86	16.18	19.33	11.92	12.9	14.44	22.77	13.66	16.93	22.27	22.09	14.88	14.53	13.74	17.99	11.66	13.53	12.57	10.09
AT1G07850	0	0	0.08	0	0	0	0.12	0	0.06	0	0	0.08	0	0	0.07	0	0	0	0	0
AT1G07860	0	0	0	0	0	0	0.28	0	0.3	0	0	0	0.83	0	0	0	0	0	0	0
AT1G07870	14.38	16.87	13.79	13.43	18.35	14.74	17.83	15.31	19.14	16.89	18.01	16.05	20.3	17.12	18.86	17.75	14.28	11.52	15.42	12.11
AT1G07880	0.37	1.29	1.32	0.97	0	0.46	1.49	0.54	1.3	1.32	1.77	1.38	2.64	2.23	2.02	1.19	3.45	2.06	1.94	2.35
AT1G07885	0	0	0	0	0	0	0	0	0	0	0	0	0	0	0	0	0	0	0	0
AT1G07890	1195.71	1273.24	1075.43	1215.75	1402.88	1183.69	1161.55	1130.32	1275.5	1166.05	1221.13	1238.07	1167.44	1210.28	1264.43	1178.55	1606.17	1297.62	1520.73	1425.04
AT1G07900	0.27	0	0	0	0.44	0	0	0	0.21	0	0.59	0	0	0	0	0	0.6	0.64	0.23	0.92
AT1G07901	0	0	0	0	0	0	0	0	0	0	0	0	0	0	0	0	0	0	0	0
AT1G07910	5.25	6.43	6.54	9	6.03	5.7	7.38	7.74	9.47	9.89	10.97	11.21	10.37	10.61	7.7	11.05	6.5	6.45	6.62	6.62
AT1G07920	318.19	338.71	424.03	510.29	355.07	388.85	426.95	516.25	508.03	544.03	666.86	695.43	430.3	469.6	411.03	463.98	372.75	371.32	444.33	388.55
AT1G07930	250.75	276.58	319.31	441.77	286.15	298.73	325.25	422.97	440.4	478.64	609.58	639.23	412.4	433.95	408.2	418.39	292.39	285.88	344.16	316.39
AT1G07940	262.57	274.46	348.02	418.02	300.85	292.12	349.84	339.99	422.63	428.91	545.81	566.39	361.84	384.34	368.24	371.37	321.73	288.9	355.84	334.13
AT1G07950	14.1	16.44	23.36	20.41	15.92	13.55	17.05	17.96	20.08	21.36	21.72	18.9	20.99	20.25	18.16	17.24	15.14	13.56	17.09	15.4
AT1G07960	45.97	44.92	45.12	51.71	42.34	42.52	31.56	48.95	44.42	52.02	48.28	38.81	60.2	51.32	44.05	41.82	41.51	42.92	44.18	47.91
AT1G07970	4.09	4.67	6.83	7.74	4.11	4.94	6.05	6.68	6.99	8.66	10.75	11.49	8.68	8.49	7.91	7.74	5.21	4.9	5.53	5.07
AT1G07980	16.77	21.31	24.08	24.21	17.25	20.7	21.21	28.85	22.7	26.79	23.93	19.68	28.73	26.7	24.41	27.14	18.34	19.58	22.48	21.74
AT1G07985	43.61	46.22	27.17	27.2	33.81	36.9	22.02	54.41	41.24	58.29	26.48	25.85	238.38	252.27	168.78	174.94	37.45	43.16	49.3	45.57
AT1G07990	19.4	22.97	22.27	26.42	29.48	25.09	32.55	27.02	30.85	29.36	31.6	29.85	32.5	27.63	25.45	29.36	31.17	26.61	27.24	31.35
AT1G08000	5.37	5.4	7.33	8.19	6.65	7.17	7.43	6.9	8.26	10.19	11.22	10.64	10.21	6.68	8.81	10.75	7.04	5.98	9.83	6.63
AT1G08005	2.84	0	0	0	0	0	1.95	4.23	0	0	0	0	0	0	0	0	0	2.21	4.84	2.39
AT1G08010	42.7	48.62	59.6	63.79	47.6	42.24	51.85	61.89	66.77	69.09	80.74	75.71	42.69	43.31	39.5	49.66	43.86	42.72	48.79	45.98
AT1G08030	11	11.44	14.22	15.13	13.79	13.78	14.09	14.45	12.28	15.83	14.29	13.76	10.99	12.01	9.75	12.53	9.29	11.32	12.86	11.44
AT1G08032	0	0	0	0	0	0	0	0	0	0	0	0	0	0	0	0	0	0	0	0
AT1G08035	0	0.75	0.27	0.82	0.44	0.33	0	0.58	0.42	0.44	0.59	1.07	0	0.86	0.48	0.85	0	0	0.9	0.69
AT1G08040	33.48	34.98	38.12	40.93	40.41	33.69	41.19	41.49	41.11	41.26	38.71	34.52	41.79	37.9	40.91	39.49	41.88	33.97	37.97	38.3
AT1G08050	6.4	7.04	5.44	7.33	10.38	7.97	8.49	6.35	5.37	4.61	4.12	4.17	6.66	5.24	5.84	6.95	7.23	5.97	6.31	8.12
AT1G08060	3.27	3.67	4.01	4.42	4.37	4.46	5.58	4.71	5.75	5.72	6.34	7.18	5.43	4.75	4.27	5.98	5	4.5	4.8	4.87
AT1G08065	0	0	0	0	0	0	0	0	0	0	0	0	0	0	0	0	0	0	0	0
AT1G08070	0.26	0.34	0.37	0.75	0.09	0.39	0.34	0.53	0.46	0.83	1.17	0.74	0.91	1.03	0.76	0.89	0.53	0.13	0.53	0.23
AT1G08080	0	0	0.33	0	0	0	0	0.12	0	0	0.18	0	0	0	0.15	0	0	0	0	0
AT1G08090	0.27	0.06	0	0	0	0	0	0	0.11	0.23	0.08	0.34	0.66	0.44	0.43	0.22	0	0	0.06	0.17
AT1G08100	0	0.07	0	0.08	0	0	0	0	0.06	0	0	0	0.08	0.16	0	0	0	0	0	0.07
AT1G08105	0	0	0	0	0	0.06	0	0	0	0	0	0	0.03	0	0	0	0	0	0	0
AT1G08110	77.27	80.41	127.08	125.91	81.83	81.69	98.79	125.55	93.14	107.3	116.75	112.45	105.96	106.79	84.78	90.64	86.09	77.18	97.38	81.62
AT1G08115	106.1	44.59	53.93	27.33	5.54	84.66	29.3	101.51	33.83	39.74	29.85	16.72	18.32	91.33	129.04	107.23	19.13	79.55	39.51	44.29
AT1G08120	0	0	0	0	0	0	0	0	0	0	0	0	0	0	0	0	0	0	0	0
AT1G08125	11.84	13.99	14.88	14.64	13.04	13.08	15.54	22.44	12.5	20.95	17.42	19.57	15.12	17.89	13.54	16.19	15.33	13.19	15.11	14.85
AT1G08130	6.6	7.72	9.48	12.66	12.35	11.82	14.15	12.65	12.1	14.79	17.73	19.42	16.19	15.49	13.86	18.2	12.32	11.58	13.86	14.43
AT1G08135	0	0	0	0	0	0	0	0	0	0	0	0	0	0	0	0	0	0	0	0
AT1G08140	0	0	0	0	0	0	0	0	0	0.04	0	0	0	0	0	0	0	0	0	0
AT1G08150	0	0	0	0	0	0	0	0	0	0	0	0	0	0	0	0	0	0	0	0.04
AT1G08160	24.64	29.55	34.71	37.84	42.69	50.06	56.61	35.82	37.88	39.08	34.93	30.79	36.87	33.65	39.78	41.65	74.21	64.72	63.17	63.1
AT1G08165	0	0.74	0	0.81	0.65	0.49	0.28	0.57	0	0.66	0	0	0.86	0.43	0	0.32	0.45	0.63	0.67	1.02
AT1G08170	0.59	0.93	0.79	1.42	0	0	0	0	0.47	1.49	0.88	1.99	4.08	4.95	2.66	2.54	0.22	0.63	0.5	0
AT1G08180	13.25	18.3	24.43	21.21	20.5	13.5	18.74	27.57	15.52	19.6	14.17	14.79	15.06	16.29	12.91	12.01	15	11.27	10.76	12.9
AT1G08190	66.47	69.86	43.03	62.03	80.12	74.86	69.78	56.18	77.25	74.71	62.26	62.54	71.31	67.66	65.77	78.77	73.27	64.75	74.49	74.97
AT1G08200	334.53	371.37	310.27	354.01	391.96	373.59	321.18	369.05	428.72	425.77	416.26	367.7	401.19	372.8	340.18	347.12	366.84	326.97	400.86	371.7
AT1G08210	8	9.63	12.82	12.72	8.33	9.14	11.1	8.88	9.36	10.91	12.91	14.17	13.61	12.29	9.75	12.78	10.8	12.5	10	11.69
AT1G08220	3.54	5.69	6.03	9.76	4.04	5.46	6.74	6.97	7.54	8.86	11.69	14.53	8.62	9.05	8.93	10.8	4.53	4.77	5.17	4.18
AT1G08230	7.16	7.91	7.39	7.29	9.02	6.19	7.28	4.18	9.01	9.36	8.5	6.32	12.87	13.4	11.73	13.37	12.36	8.97	8.96	10.38
AT1G08240	0	0	0	0	0	0	0	0	0	0	0	0	0	0	0	0	0	0	0	0
AT1G08250	15.32	16.52	13.05	14.1	18.26	16.71	18.28	13.15	11.51	11.9	11.03	11.24	15.99	12.87	14.73	16	19.07	16.19	19.36	17.64
AT1G08260	2.31	2.9	2.5	5.19	3.26	3.76	4.55	4.26	6.43	7.12	7.8	8.44	6.87	6.61	4.8	7.11	5.04	4.75	4.19	5
AT1G08270	0.84	0.99	1.14	2.56	1.09	1.47	1.15	0.94	0.33	2.07	0.73	1.66	2.3	1.79	1.19	1.17	0.74	0.53	1	0.23
AT1G08280	9.69	7.15	10.67	13.44	9.72	9.31	10.31	10.56	9.98	11.97	10.51	12.06	10.75	7.71	7.93	9.36	10.45	8.05	9.6	10.73
AT1G08290	0	0.21	0.15	0.15	0.24	0.36	0.21	0.16	0.58	0.43	0.33	0.3	0.4	0.16	0.2	0.18	0.5	0.29	0.19	0.44
AT1G08300	0.62	0.74	1.2	0.93	0.09	0.6	1.23	0.49	0.9	0.99	1.58	1.08	1.6	1.36	1.18	0.78	0.51	0.23	0.43	0.44
AT1G08310	3.19	3.64	4.45	3.29	4.68	2.98	3.21	2.78	2.12	2.3	3.66	2.06	3.19	4.36	2.88	3.01	5.69	4.97	4.35	4.75
AT1G08315	16.09	15.95	14.42	12.15	19.11	16.19	18.21	13.41	16.54	15.03	12.3	13.11	10.92	13.23	15.11	15.02	19.07	14.74	14.39	14.77
AT1G08320	45.32	51.32	39.73	39.73	62.25	48.75	62.62	45.15	47.7	45.99	36.76	31.02	60.53	49.72	53.57	50.88	48.93	40.47	45.89	45.36
AT1G08340	21.32	25.86	17.16	25.45	25	27.13	20.03	31.48	16.44	17	17.5	16.82	24.41	22.09	22.87	21.32	19.27	20.36	18.85	19.23
AT1G08350	7.54	8.17	9.4	13.23	11.3	9.05	11.22	9.48	12.37	12.77	14.02	12.49	11.9	11.97	12.63	10.41	11.71	9.9	10.54	10.57
AT1G08360	246.95	258.46	351.12	410.42	212.35	266.15	252.56	493.66	329.29	421.34	453.44	470.33	407.08	400.39	353.25	352.87	243.21	248.14	322.53	258.07
AT1G08370	27.93	27.77	37.67	38.09	35.83	34.53	40.35	32.28	43.62	42.5	45.65	46.38	37.04	38.9	38.86	39.1	36.45	35.18	39.28	38.85
AT1G08380	61.74	67.21	136.91	73.87	131.79	129.83	124.29	105.45	57.69	86.73	60.61	68.33	13.54	14.01	19.95	29.85	235.88	185.62	151.24	167
AT1G08390	2.76	3.78	6.83	5.43	2.49	3.59	4.18	4.95	6.01	5.05	5.89	4.05	4.93	2.74	4.06	2.42	5.97	4.02	6.39	4.34
AT1G08400	2.51	2.16	2.52	3.79	3.38	3.19	3.53	2.27	3.39	3.89	2.86	3.25	4.4	2.96	4.07	3.97	2.89	2.62	2.86	2.74
AT1G08410	2.64	3.37	4.5	6.54	4.37	4.21	5.29	8.13	6.66	7.62	11.15	11.44	10.62	9.69	9.46	9.92	3.39	4.1	4.63	3.76
AT1G08420	23.05	25.31	18.24	28.42	33.18	29.07	28.89	25.08	38.1	37.09	32.79	34.72	32.94	32.63	30.77	36.49	33.51	29.9	32.18	32.01
AT1G08430	5.06	6.63	10.28	8.81	20.16	9.41	19.16	7.44	4.37	4.38	6.12	4.19	2.26	1.45	2.7	3.35	19.15	13.3	8.09	9.7
AT1G08440	0	0	0	0	0.14	0	0	0	0.14	0	0.1	0	0	0	0	0	0	0	0	0
AT1G08450	37.19	40.52	46.68	50.14	47.1	43.92	49.59	52.78	43.65	51.28	46.77	43.07	43.85	37.9	35.74	38.79	51.46	42.61	47.03	50.94
AT1G08460	13.95	13.28	14.33	13.48	10.8	13.42	15.28	12.2	12.44	12.47	14.28	13.78	14.66	15.75	13.2	17.23	14.58	13.33	12.88	12.65
AT1G08465	2.28	3.11	4.25	3.64	2.64	2.91	2.65	3.74	4.19	5.34	3.44	5.06	2.73	3.49	3.4	3.86	4.39	3.29	4.16	3.35
AT1G08470	17.04	17.04	14.21	16.33	20.14	21.05	15.15	15.02	17.42	16.78	14.21	12.94	14.76	17.91	13.32	13.68	23.93	22.45	25.24	24.65
AT1G08480	205.59	221.25	276.29	265.57	195.55	179.74	205.23	255.9	244.71	226.16	269.7	272.48	224.78	245.02	236.89	231.1	202.86	169.61	209.58	179.27
AT1G08490	15.87	19.51	21.79	20.72	22.46	20.18	21.81	13.27	25.8	25.69	26.61	24.26	21.81	18.77	17.11	19.95	24.06	22.32	24.79	26.82
AT1G08500	189.91	211.97	115.7	104.08	203.99	185.02	125.65	83.02	152.6	147.08	85.07	69.03	142.29	129.99	119.23	108.59	180.33	145.12	187.36	187.39
AT1G08510	124.71	144.27	175.25	181.62	174.27	148.45	210.69	156.92	159.29	147.36	170.15	142.8	95.58	90.26	87.96	104.46	121.01	111.79	133.22	121.12
AT1G08520	19.15	27.25	41.03	42.05	40.49	43.25	48.61	49.83	38.69	50.76	54.52	64.4	23.31	26.63	23.51	36.9	48.1	52.07	46.14	48.34
AT1G08530	8.82	9.12	11.7	14.39	6.56	9.25	11.18	10.19	12.91	11.81	15.6	14.53	15.21	13.64	11.53	11.85	11.98	11.77	11.84	11.95
AT1G08540	12.1	14.98	23.21	21.71	18.93	23.74	21.15	25.94	17.49	23.83	21.87	25.71	9.13	9.44	10.3	16.44	25.05	26.01	26.44	26.65
AT1G08550	3.83	5.01	8.61	8.85	7.11	8.66	8.41	9.85	7.17	9.27	9.97	10.83	5.75	7.81	5.37	7.37	9.63	11.03	10.56	10.16
AT1G08560	18.75	23	22.61	27.76	24.66	27.89	19.86	45.74	32.17	48.3	38.35	36.46	26.53	26.35	21.98	25.53	45.07	38.83	45.68	44.95
AT1G08570	54.07	56.72	52.21	50.16	69.78	53.76	61.45	45.75	50.45	55.25	47.67	39.65	65.99	64.03	46.41	52.2	60.11	52.15	53.86	57.19
AT1G08580	29.19	28.76	49.71	49.41	25.65	34.59	32.34	61.19	49.71	52.38	52.52	60.75	40.89	45.73	42.92	56.4	32.24	33.16	42.82	32.82
AT1G08590	23.67	26.06	19.52	26.36	27.13	30.04	19.55	27.38	31.42	33.11	28.07	25.19	41.03	34.64	30.5	35.16	25.11	26.36	28.44	30.81
AT1G08592	0.4	1.06	1.86	1.82	1.19	1.05	1.57	1.46	1.15	1.61	2.24	2.11	1.4	2.46	1.52	1.88	0.73	1.61	1.02	1.39
AT1G08600	6.06	6.98	6.54	8.65	9.59	9.12	9.84	9.1	8.45	9.45	9.09	10.57	10.46	9.11	7.91	11.2	9.37	9.35	8.76	10.86
AT1G08610	1.1	1.26	2.09	2.65	1.51	1.33	1.86	3.03	2.44	2.61	4.23	5.92	2.93	3.54	3.15	4.29	1.24	2.01	1.81	1.53
AT1G08620	9.44	10.72	9.62	11.58	12.66	10.53	12.21	12.67	13.09	13.93	14.64	15.08	12.84	11.37	11.81	15.08	10.77	10.47	10.57	11.84
AT1G08630	0.47	0.27	1.3	0.49	0.31	0.28	0.21	0.18	0.23	1.23	0.21	0.37	2.7	1.65	0.34	0.61	0.11	0.3	0.47	0.24
AT1G08640	14	10.7	25.99	29.5	15.88	19.13	24.1	20.72	20.61	26.93	33.13	39.53	23.78	21.79	23.02	24.11	20.45	20.34	23.39	21.06
AT1G08650	18.49	22.13	14.25	15.33	24.96	24.62	27.96	17.36	28.36	26	13.51	14.57	31.67	28.88	25.11	29	30.15	22.44	25.71	24.58
AT1G08660	29.12	28.55	42.63	48.13	31.37	32.3	38.19	39.6	49.16	45.85	55.34	48.55	42.23	48	37.37	45.53	33.51	34.7	37.15	35.93
AT1G08670	13.48	12.17	11.23	9.26	13.66	12.64	17.44	11.14	11.76	13.09	8.83	9.43	12.92	12.94	12.95	9.7	17.49	13.81	14.48	13.21
AT1G08680	22.04	22.53	26.46	26.75	34.92	27.36	36.39	24.39	35.26	30.41	32.17	30.97	27.11	26.52	24.26	27.55	37.93	29.33	27.21	35.18
AT1G08695	0	0	0	0	0	0	0	0	0	0	0	0	0	0	0	0	0	0	0	0
AT1G08700	16.5	15.34	19.05	22.92	17.61	16.92	22.6	19.43	14.7	14.92	17.39	17.9	13.88	14.19	11.06	13.85	17.05	16.81	18.87	17.73
AT1G08710	7.8	9.81	11.48	11.87	8.33	10.46	10.68	11.46	10.25	11.15	12.19	13.53	14.81	11.53	9.25	11.23	8.43	7.21	10.88	8.96
AT1G08720	8.33	9.88	10.71	13.55	13.03	9.91	15.72	11.76	12.63	12.79	14.18	12.73	12.33	11.8	10.47	12.13	12.35	10.08	11.28	11.38
AT1G08730	0.29	0.32	0.26	0.67	0.21	0.29	0.3	0.32	0.64	0.46	0.78	0.39	0.25	0.59	0.54	0.5	0.21	0.27	0.48	0.38
AT1G08735	0.01	0.01	0	0	0	0.01	0	0	0.01	0	0	0	0	0.01	0	0.01	0.12	0.04	0.06	0.07
AT1G08740	0	0	0	0	0	0.02	0	0	0	0.1	0	0.12	0	0	0.14	0	0	0	0	0
AT1G08750	12.27	11.73	15.36	17.41	13.8	12.68	15.78	13.03	19.44	20.01	17.78	22.48	19.86	18.27	16.1	15.86	15.96	15.28	17.69	19.04
AT1G08760	15.58	21.03	12.73	15.65	26.78	21.74	17.57	18.64	21.56	20.24	15.75	16.11	20.86	19.8	18.83	21.31	23.46	20.1	25.09	25.05
AT1G08770	49.67	49.12	57.52	55.34	52.38	44.51	59.49	45.42	51.12	49.42	54	49.77	44.76	39.01	48.85	42.49	55.64	40.39	47.04	46.98
AT1G08780	28.12	32.36	30.61	41.92	23.66	34.84	28.69	59.38	33.25	37.02	32.81	45.85	39.95	34.77	32.06	35.34	31.84	30.92	35.35	30.36
AT1G08790	0	0	0	0	0	0	0	0	0	0	0	0	0	0.29	0	0	0	0	0	0
AT1G08800	14.56	15.83	14.93	20.58	22.32	17.42	22.05	16.98	22.07	21.69	20.49	19.53	21.77	18.08	18.27	19.28	21.62	17.06	20.22	21.02
AT1G08810	3.57	4.06	9.78	10.48	9.55	6.54	9.15	6.29	5.3	8.82	11.11	9.18	2.29	4.05	2.46	3.67	7.22	6.87	5.63	7.44
AT1G08820	35.64	40.3	40.65	49.94	45.12	43.5	52.12	47.07	44.01	41.83	48.37	48.88	46.19	46.66	37.48	43.43	52.21	42.33	52.2	49.05
AT1G08830	1028.96	1125.79	1116.64	1138.06	1065.96	879.03	1013.2	1102.86	959.58	931	992.33	903.38	1021.55	998.22	1026.98	994.59	1123.16	955.38	1091.38	1031.87
AT1G08840	0.99	0.93	1.54	2.13	0.89	1.06	1.22	1.63	2.22	3.23	3.17	3.62	2.87	3.01	2.64	3.3	1.41	1.48	1.18	1.52
AT1G08845	2.79	3.41	6.94	5.05	1.5	3.05	4.43	6.48	4.2	5.77	6.89	7.14	5.34	8.81	6.37	8.04	4.34	4.06	3.69	4.1
AT1G08860	0.07	0	0	0.3	0.12	0.14	0.16	0.11	0.35	0.31	0.25	0.44	0.4	0.08	0.27	0.12	0.17	0	0.06	0.13
AT1G08870	0	0	0	0	0	0	0	0	0	0	0	0	0	0	0	0	0	0	0	0
AT1G08880	119.74	128.66	163.59	148.55	124.79	119.25	126.04	152.38	137.1	150.12	155.59	152.03	127.05	118.46	120.79	124.59	124.19	109.48	128.24	120.01
AT1G08890	74.17	73.31	38.63	45.17	80.43	70.96	52.13	28.69	76.9	72.32	32.82	27.56	68.68	55.38	54.17	54.2	89.11	74.67	75.5	85.34
AT1G08900	2.7	3.79	5.94	2.55	4.23	3.08	4.54	1.56	3.48	3.37	3.31	4.07	1.97	1.75	2.45	2.11	5.03	3.69	4.47	4.84
AT1G08910	3.26	5.37	6.73	7.07	5.45	5.07	6.32	5.58	8.54	12.1	9.43	12.56	14.51	14.51	10.06	13.33	7.51	5.89	7.2	6.28
AT1G08920	18.66	22.34	14.01	13.99	17.23	14.93	10.34	7.28	22.04	24.51	14.41	13.18	22.02	21.12	18.19	21.05	38.61	33.04	37.92	36.75
AT1G08930	76.76	77.55	88.38	89.36	118.99	75.13	127.84	57.91	78.11	67.29	80.58	71.39	56.32	50.28	57.55	59.47	81.66	58.21	66.78	67.73
AT1G08940	14.58	17.99	19.74	15.34	15.81	17.97	17.17	17.94	13.82	15.51	11.7	10.88	13.24	9.95	13.55	15.79	17.7	13.13	17.13	17.86
AT1G08950	0	0	0	0	0	0	0	0	0	0	0	0	0	0	0	0	0	0	0	0
AT1G08960	6.83	6.01	6.5	7.94	7.28	6.85	7.47	4.8	11.31	9.66	9.64	10.21	8.59	8.41	7.58	8.23	7.16	8.11	8	8.62
AT1G08970	38.05	47.2	54.76	56.24	52.62	47.46	55.26	66.46	45.96	44.84	53.14	50.47	52.37	51.33	45.09	50.33	49.6	44.11	48.81	52.87
AT1G08980	8.8	10.29	20.15	16.8	14.39	13.59	16.46	11.57	8.75	10.75	9.15	11.83	3.57	3.77	2.73	4.32	16.97	18.17	12.21	14.25
AT1G08985	0	0	0	0	0	0	0	0	0	0	0	0	0	0	0	0	0	0	0	0
AT1G08990	16.98	19.23	10.27	15.91	22.95	20.53	18.37	15.56	13.72	13.92	10.56	9.28	20.03	17.33	19.76	18.86	22.77	20.2	20.09	19.23
AT1G09000	2.62	3.3	3.31	5.17	2.76	4.2	4.7	5.49	4.76	4.99	6.35	6.07	5.22	7.19	6.1	5.81	5.93	4.11	4.92	5.02
AT1G09010	22.19	24.29	27.86	31.42	32.21	27.03	31.98	27.91	32.5	36.6	38.9	39.14	31.34	32.53	25.87	34.65	31.15	27.76	28.35	29.06
AT1G09020	31.43	33.75	32.31	40.29	40.19	37.59	35.76	29.9	48.52	42.69	47.83	44.83	39.66	39.91	38.56	40.25	39.88	34.03	38.95	37.66
AT1G09026	0	0	0	0	0	0	0	0	0	0	0	0	0	0	0	0	0	0	0	0
AT1G09030	0	0	0	0	0	0	0	0	0	0	0	0	0	0	0	0	0	0	0	0
AT1G09040	1.43	1.7	1.99	2.29	2.79	2.4	3.06	3.03	2.65	2.89	3.35	3.02	2.56	2.52	2.27	3	2.35	2.21	2.35	3.09
AT1G09050	1.15	1.06	1.4	1.47	1.05	1.22	1.8	1.23	1.21	1.37	1.48	1.98	1.69	1.11	0.84	0.97	1.24	1.03	0.93	0.95
AT1G09060	7.54	10.08	10.71	13.44	13.44	12.7	14.02	14	13.55	14.76	16.22	16.8	14.11	12.27	11.53	13.39	13.41	12.86	13.42	14.84
AT1G09070	110.28	121.4	123.13	112.27	130.77	120.95	135.75	101.9	118.63	117.19	109.11	102.18	82.91	85.62	88.88	88.24	151.88	122.4	137.18	123.45
AT1G09080	0.37	0.11	0.12	0.19	0.1	0.04	0.09	0.09	0.15	0.36	0.14	0.12	0.27	0	0	0	0.34	0.24	0.21	0.26
AT1G09090	7.65	9.4	9.82	8.79	11.92	10.45	12.09	8.74	6.87	5.87	6.28	4.42	7.39	8.22	6.6	8.52	13.29	8.77	11	10.99
AT1G09100	22.18	26.66	31.58	40.01	24.95	29.27	28.8	40.52	27.56	32.92	40.5	40.05	37.49	35.78	29.75	32.96	27.81	28.92	33.58	31.23
AT1G09110	0	0	0	0	0	0	0	0	0	0	0	0	0	0	0	0	0	0	0	0
AT1G09130	34.29	41.93	65.25	55.92	45.72	48.2	56.68	54.6	59.59	67.18	74.68	89.42	46.79	50.52	41.9	57.06	52.85	56.76	63.33	57.49
AT1G09140	47.41	53.11	59.66	67.69	55.57	49.92	72.66	50.94	60.97	62.01	67.56	67.92	96.41	92.19	79.59	83.96	69.72	59.58	64.83	67.92
AT1G09150	42.95	49.73	73.08	61.32	49.15	54.57	55.12	77.35	60.39	70.86	75.6	78.49	63.05	57.01	59.61	56.1	47.67	46.34	57.83	56.34
AT1G09155	8	6.77	6.45	7.54	5.66	6.19	6.21	11.75	8.48	7.46	4.08	4.61	6.97	6.74	6.08	7.19	7.24	6.5	6.69	6.72
AT1G09157	0	0	0	0	0	0	0.29	0	0	0	0	0	0	0	0	0	0	0	0	0
AT1G09160	19.36	20.25	16.43	21.48	21.74	21.27	19.58	18.2	30.93	27.11	26.52	26.43	21.58	22.95	19.95	23.16	24.53	22.83	26.78	24.63
AT1G09170	2.59	3.28	2.07	3.73	2.85	3.56	2.18	3.27	3.48	3.54	3.31	3.03	5.95	4.54	5.24	5.48	1.81	2.54	3.21	2.85
AT1G09176	4.39	3.1	1.84	2.64	1.21	2.27	0.79	1.07	2.04	1.84	2.45	1.11	3.59	2.39	7.34	3.81	0.83	0.58	0.93	0.63
AT1G09180	2.35	2.58	1.77	1.41	1.29	1.22	0.42	0.14	2.34	1.47	0.87	0.99	1.92	1.28	1.23	0.63	2.88	4.07	2.49	4.23
AT1G09190	1.14	1.22	0.9	1	1.21	0.96	0.88	2.01	1.56	1.97	1.36	1.72	1.24	1.6	1.32	1.38	0.46	0.91	1.17	0.77
AT1G09195	5.47	6.36	6.06	6.89	6.86	7.2	10.42	6.37	7.83	8.82	6.61	7.15	9.75	7.11	7.29	8.38	7.77	6.63	8.41	8.17
AT1G09200	166.02	165.97	203.22	219.59	121.56	163.73	115.76	247.72	215.38	236.45	236.74	239.39	186.59	188.6	163.94	184.44	147.42	148.44	178.28	149.15
AT1G09210	148.82	163.79	136.52	185.96	157.92	195.17	113.25	228.04	253.74	259.73	224.63	221.96	236.54	226.21	192.54	231.56	183.2	181.73	233.48	211.8
AT1G09220	0.23	0.36	0.93	0.24	0.38	0.29	0.5	0.67	0.37	0.65	1.03	0.78	0.76	0.67	0.42	0.87	0.44	0.99	0.39	0.73
AT1G09230	6.32	8.54	10.11	9.54	9.44	7.28	10.99	8.64	10.64	12.89	11.89	15.81	10.37	10.69	10.48	13.27	10.18	7.9	8.73	9.14
AT1G09240	0.96	0.9	1.39	1.42	0.18	0.33	0.54	1.47	1.19	0.98	1.66	2.15	0	0	0.67	0.26	0.12	0.43	0.36	0.18
AT1G09245	0	0	0	0	0	0	0	0	0	0	0	0	0	0	0	0	0	0	0	0
AT1G09250	60.34	57.1	42.44	42.4	61.28	60.05	44.02	46.54	58.32	64.07	36.88	35.3	50.62	47.21	42.79	48.29	59.23	57.04	69.19	59.79
AT1G09260	0	0	0	0	0	0	0	0	0	0	0	0	0	0	0	0	0	0	0	0
AT1G09270	56.91	62.36	46.23	58.19	75.04	71.37	51.91	51.36	74.84	76.21	70.66	63.29	74.37	62.97	63.24	70.94	74.98	72.68	80.42	80
AT1G09280	10.75	13.11	17.21	15.75	14.88	14.89	17.63	14.2	12.69	15.07	18.26	18.85	24.06	25.08	20.63	21.24	15.62	14.12	12.35	14.9
AT1G09290	5.91	6.54	13.18	12.5	6.27	7.49	10.33	13.46	9.27	9.53	16.84	13.73	14.13	14.05	12.75	12.09	7.76	7.69	9.21	9.58
AT1G09300	3.43	2.7	4.11	5.41	3.99	3.15	3.54	4.2	5.36	4.89	6.61	7.11	6.34	6.31	5.27	7	3.72	3.51	3.38	3.26
AT1G09310	4547.64	5541.34	4880.2	4424.07	6459.29	4733.42	4725.58	6193.76	4241.94	4474.82	3772.72	3314.51	3216.76	3000.1	3337.64	3370.53	5572.99	4240.19	5006.33	4846.4
AT1G09320	2.72	2.02	3.5	4.82	3.86	3.03	4.49	4.74	3.89	4.97	5.15	4.91	5.43	5.04	3.88	5.15	2.72	2.58	4.18	3.5
AT1G09330	96.58	88.43	84.17	106.65	85.94	75.64	75.9	64.06	103.15	100.39	94.85	94.34	101.27	104.35	85.98	83.07	87.5	78.31	94.44	89.6
AT1G09340	18.71	26.53	42.82	33.91	40.8	40.78	40.52	33.63	44.73	63.62	49.44	57.36	16.91	20.33	18.56	25.42	78.62	69.96	58.49	65.72
AT1G09350	3.76	3.06	1.74	1.26	7.73	4.06	2.88	3.93	2.11	2.55	0.34	0.72	1.66	1.33	2.3	1.72	3.8	3.01	3.45	4.05
AT1G09360	0	0	0	0	0	0	0	0	0	0	0	0	0	0	0	0	0	0	0	0
AT1G09370	0	0	0	0	0.48	0.18	0.21	0	0	0	0.97	0	0	0	0	0	0.33	0	0	0.25
AT1G09380	3.65	3.19	3.51	4.36	0.68	1.19	1.02	3.38	4.24	3.95	7.4	7.28	6.68	6.16	12.95	13.59	2.53	2.13	5.41	2.44
AT1G09390	28.14	32.17	34.38	38.53	21.61	30.46	20.49	28.19	34.64	38.6	37.02	39.7	24.86	22.67	21.23	24.05	24.26	23.72	27.36	25.11
AT1G09400	0	0	0.11	0.58	0	0	0	0	0.09	0.19	0	0.23	0	0	0	0	0	0	0	0.1
AT1G09410	0.36	0.39	0.48	0.68	0.2	0.6	0.61	0.57	0.34	0.75	0.4	0.85	0.98	0.2	0.49	0.63	0.27	0.43	0.46	0.52
AT1G09415	7.46	13.81	17.3	11.88	15.68	14.9	14.06	21.93	9.92	16.46	15.39	12.31	9.6	10.84	10.98	11.09	11.25	15	10.16	11.52
AT1G09420	10.02	14.13	21.84	20.35	13.49	15.49	20.34	18.29	22.12	26.05	24.75	27.49	18.88	20.16	15.91	20.57	17.91	21.67	18.83	21.14
AT1G09421	0	0.8	2.01	1.76	1.41	1.59	2.06	0.42	0.68	0.72	0.64	1.44	0	0.62	0.77	0.23	0.97	0.68	0.48	0.74
AT1G09430	59.29	68.5	82.76	87.43	78.65	63.03	89.93	74.09	60.33	62.73	79.83	75.86	74.28	70.78	65.32	68.95	63.01	51.92	60.03	61.27
AT1G09440	2.69	2.68	2.63	4.53	7.13	6.14	5.03	4.63	4.75	5.11	5.46	4.03	5.59	4.45	4.49	4.6	7.46	5.29	7.12	7.26
AT1G09450	1.21	1.54	2.32	2.44	0.6	1.63	1.85	2.96	2.91	2.44	3.05	2.88	1.98	1.66	1.26	2.21	2.68	1.99	1.7	1.79
AT1G09460	22.82	27.47	29.75	29.69	31.78	30.12	26	18.16	33.55	31.55	26.41	23.44	33.09	31	29.51	25.53	67.43	53.55	47.87	55.66
AT1G09470	2.66	3.05	2.78	2.35	1.93	1.46	0.48	2.72	3.85	6.8	3.89	4.3	1.68	2.16	1.88	1.83	3.6	3.78	3.72	3.88
AT1G09480	4.01	4.45	2.32	2.38	4.01	3.25	1.5	0.89	4.17	4.57	2.71	2.33	1.72	1.72	1.9	1.86	8.25	7.2	7.93	7.4
AT1G09483	0	0	0	0	0	0	0	0	0	0	0	0	0	0	0	0	0	0	0	0
AT1G09486	2.06	3.15	3.07	3.67	1.24	2.61	4.07	2.45	2.4	3.04	2.46	1.52	2.4	1.2	2.39	2.25	3.72	2.75	2.34	1.74
AT1G09490	19.36	22.62	20.44	21.73	19.88	20.36	25.63	17.61	21.42	21.09	22.35	19.33	19.54	18.9	17.07	17.61	26.48	21.71	25.15	21.2
AT1G09500	0.49	0.52	0.47	0.14	0.39	0.43	0.45	0.43	0.56	1.05	0.62	0.75	1.71	1.07	1.35	1.41	0.26	0.22	0.71	0.51
AT1G09510	0.13	0	0	0	0	0	0	0	0	0	0.14	0.13	0	0.14	0.23	0.2	0	0	0	0.11
AT1G09520	10.5	9.87	17.23	19.25	11.7	9.89	19.74	16.91	10.62	11.44	24.95	26.23	13.43	15.06	14.43	15.17	8.98	8.02	8.59	8.87
AT1G09530	56.5	63.6	150.48	171.68	74.11	56.05	171.01	152.27	69.14	71.71	175.89	168.93	59.3	55.21	63.06	71.39	37.39	35.68	33.43	35.5
AT1G09540	18.04	22.1	31.15	28.46	19.72	15.85	21.93	18.04	16.97	17.57	22.86	16	13	10.75	10.47	9.63	26.61	15.15	19.13	18.32
AT1G09550	0	0	0	0	0	0	0	0	0	0	0	0	0	0	0	0	0	0	0	0
AT1G09560	266.07	280.5	273.71	271.58	352.9	277.64	351.23	211.51	275.9	245.95	247.48	209.83	258.82	272.3	256.67	239.68	349.87	240.71	274.94	283.27
AT1G09570	186.17	214.58	151.7	199.08	205.56	188.22	171.42	181.98	265.47	275.06	248.47	247.16	244.79	255.54	192.21	233.09	230.44	228.51	258.6	246.02
AT1G09575	13.05	13.91	7.51	9.97	12.32	14.66	8.11	8.92	14.23	16.67	12.62	10.58	12.69	12.72	9.88	13.53	13.97	12.78	15.81	14.91
AT1G09580	28.87	27.7	28.47	29.91	21.61	25.28	19.28	42.65	35.04	36.62	37.94	40.78	34.89	32.17	27.92	32.24	21.1	19.74	27.16	19.76
AT1G09590	241.85	240.01	340.31	402.06	178.41	248.22	213.57	553.48	301.13	358.93	423.55	449.25	309.85	338.74	316.16	350.12	199.7	228.69	297.17	244.25
AT1G09600	1.3	0.95	1.07	1.46	1.17	1.88	1.16	2.85	2.79	3.57	3.04	3.4	3.8	3.3	3.1	3.25	1.61	1.8	2.61	2.05
AT1G09610	1.25	2.24	2.4	2.34	3.75	3.04	2.63	2.23	2.54	2.28	0.89	1.03	2.72	1.86	2.56	2.2	3.59	2.36	3.08	2.84
AT1G09620	17.27	21.25	26.83	35.78	28.67	29.85	37.61	34.12	38.65	41.95	52.69	60.9	42.98	40.34	34.96	46.11	28.43	29.22	30.45	32.08
AT1G09625	0	0	0	0	0	0	0	0	0	0	0	0	0	0	0	0	0	0	0	0
AT1G09630	49.14	57.01	48.34	50.37	44.75	51.7	33.71	73.32	49.35	62.35	50.3	52.27	53.08	61.06	47.38	47.47	41.47	44.84	55.17	41.37
AT1G09640	105.88	120.79	166.76	210.43	117.35	126.11	155.27	193.51	199.71	206.89	303.5	300.55	221.73	224.87	196.46	200.07	136.3	128.83	157.92	143.05
AT1G09645	45.33	55.32	50.09	46.12	55.93	41.07	53.86	42.69	52.5	55.88	41.65	37.62	53.13	43.4	48.66	37.73	51.3	34.28	55.3	49.09
AT1G09650	0.44	0.42	0.53	1.09	0.73	0.83	0.96	1.22	0.49	0.89	0.59	0.98	2.31	0.97	1.04	1.14	1.2	0.28	0.97	0.61
AT1G09660	16.02	18.93	24.42	27.23	20.32	21.11	25.2	31.89	26.43	24.36	26.83	27.71	21.74	24.24	20.5	29.28	22.89	21.68	27.51	21.61
AT1G09665	0	0	0	0	0	0	0	0	0	0	0	0	0	0	0	0	0	0	0	0
AT1G09680	0.21	0.2	0.57	0.58	0.7	0.31	0.41	0.56	0.84	0.53	0.71	0.57	0.69	0.38	0.38	0.74	0.16	0.68	0.48	0.43
AT1G09690	366.7	398.61	537.46	576.69	315.53	392.58	345.11	838.6	506.16	639.95	682.77	733.55	576.96	634.99	511.3	583.41	312.85	364.45	458.03	358.47
AT1G09700	4.06	5.03	6.47	7.97	5.81	5.15	7.77	8.53	6.54	8.33	8.69	10.19	8.92	6.52	8.71	7.78	6.4	6.25	6.55	6.95
AT1G09710	2.73	2.57	3.77	3.25	2.75	3.37	4.74	2.6	2.75	3.28	3.12	4.67	4.98	3.7	3.38	3.36	4.9	3.62	4.08	4.32
AT1G09720	0	0	0	0	0	0	0.03	0	0	0	0	0	0	0	0	0	0	0	0	0
AT1G09730	10.06	11.26	12.35	14.19	13.05	13.86	16.68	14.93	14.35	17.25	17.25	14.42	16.76	15.32	13.82	16.78	14.04	13.71	13.63	14.88
AT1G09740	225.77	229.31	232.12	221.12	246.79	196.68	287.8	172.9	170.19	150.15	156.37	147.65	181.98	161.37	194.09	188.32	214.13	165.33	184.62	197.43
AT1G09750	75.01	80.62	66.56	51.87	105.98	103.14	56.3	37.63	102.06	97.97	47.06	43.43	45.92	62.59	54.93	67.17	117.04	108.04	107.21	109.66
AT1G09760	21.24	23.33	32.31	36.59	22.17	26.38	26.15	31.7	36.96	37.98	53.56	50.43	39.03	38.15	38.22	38.97	30.75	25.91	31.92	31.38
AT1G09770	26.4	31.99	30.48	41.59	35.93	38.68	36.08	53.14	40.53	44.72	45.95	49.97	54.74	50.47	38.52	52.92	34.75	36.72	38.51	39.98
AT1G09780	137.44	148.75	158.48	197.59	150.98	155.67	143.27	212.02	189.28	190.19	255.94	255.89	172.61	164.89	167.9	178.12	130.61	121.97	151.6	139.2
AT1G09790	0	0	0	0	0	0	0	0	0	0	0	0	0	0	0	0	0	0	0	0
AT1G09794	28.67	25.48	33.78	37.45	21.37	22.58	25.03	39.53	30.9	33.86	33.84	34.62	32.59	40.01	35.42	38.83	24.25	16.76	27.06	23.32
AT1G09795	10.58	11.23	18.19	17.73	11.51	15	15.54	19.93	18.2	22.02	27.17	29.49	13.77	15.59	14.84	18.67	17.9	17.77	18.96	16.89
AT1G09800	1.36	2.05	3.75	3.46	0.75	2.49	3.56	3.18	3.34	3.88	5.58	5.96	3.36	4.86	4.1	4.62	1.44	2.84	3.54	3.06
AT1G09810	3.7	4.15	4.6	5.01	4.91	5.1	6.52	6.08	4.8	6	9.47	7.02	8.45	7.44	6.35	8.08	5.66	5.05	5.9	4.01
AT1G09812	15.57	16.82	2.77	2.83	16.66	11.38	3.3	4.35	9.85	9.22	2.56	3.23	5.49	8.47	7.37	7.7	14.02	13.15	13.59	9.86
AT1G09815	33.69	30.64	35.31	34.49	34.53	31.88	28.61	50.49	29.22	36.13	36.13	35.36	33.79	27.45	33.15	34.71	32.3	29.65	34.87	30.67
AT1G09820	2.39	2.92	3.67	4.49	3.75	3.28	3.34	3.92	4.77	5.35	5.34	5	4.94	4.89	4.37	4.49	3.72	3.21	4.31	3.1
AT1G09830	10.49	12.15	16.49	17.84	10.56	12.89	17	16.91	18.77	20.07	26.63	29.9	12.91	15.46	17.07	17.17	14.22	14.58	16.57	13.3
AT1G09840	30.93	37.6	33.81	41.8	40.21	35.6	42.12	47.63	40.47	40.59	42.92	36.05	41.75	35.55	34.67	37.77	38.5	31.81	35.67	36.6
AT1G09850	26.96	26.45	24.52	33.97	27.29	28.71	24.38	30.77	35.04	35.05	35.48	32.62	31.17	29.1	25.14	31.02	25.62	25.91	32.04	27.57
AT1G09860	3.68	5.12	1.86	4.01	2.7	3.7	1.63	2.46	3.43	1.63	1.26	2.79	2.23	2.24	1.57	1.16	1.39	2.21	2.52	1.95
AT1G09870	31.95	39.33	44.76	47.45	41.21	42.51	43.37	43.56	54.12	52.23	57.53	54.45	56.2	58.29	45.36	51.41	43.89	41.37	48.93	47.69
AT1G09880	0.61	1.21	1.29	2.16	1.9	2.57	1.67	0.74	2.43	1.92	2.64	1.57	1.54	0.89	1.22	1.25	4.12	2.54	3.49	3.39
AT1G09890	3.3	4.94	6.25	7.92	9.69	10.63	10.23	4.47	7.32	7.05	9.86	8.84	9.69	8.25	8.53	9.2	10.94	9.02	10.23	11.84
AT1G09900	3.36	2.89	4.83	6.78	2.84	4.55	4.57	8.19	4.46	6.64	7.19	9.09	5.06	5.08	5.3	5.83	2.75	3.32	4.37	4.52
AT1G09910	3.91	4.63	6.51	6.25	3.37	3.39	4.28	3.8	5.03	7.97	7.34	7.38	7.41	7.25	4.92	6.18	6.35	5.18	5.05	5.64
AT1G09920	79.37	74.46	96.2	82.66	95.69	73.81	96.79	94.41	65.73	70.34	67.84	54.71	63.09	64.31	63.24	65	79.99	66.83	82.08	75.86
AT1G09930	0.46	0.76	0.35	1.01	0.19	0.57	0.75	1.01	0.96	0.77	0.83	0.41	0.69	0.57	0.88	0.46	0.59	0.23	0.58	0.5
AT1G09932	9.4	10.28	7.91	12.99	9.43	11.53	9.23	14.66	13.39	11.74	9.96	9.19	15.93	11.43	14.13	11.89	7.8	7.91	9.48	6.79
AT1G09935	0	0	0	0	0	0	0	0	0	0	0	0	0	0	0	0	0	0	0	0
AT1G09940	9.8	10.56	10.11	11.71	10.73	11.58	13.79	13.28	9.6	10.61	11.95	12.19	14.21	12.87	10.79	11.8	9.93	8.55	10.35	10.67
AT1G09950	0.13	0.12	0.67	0.14	0.44	0.33	0.38	0	0.95	1.22	0.3	0.8	1.16	0.87	0.72	0.53	1.65	1.17	2.59	0.92
AT1G09960	12.1	10.88	9.25	12.27	8.12	11.89	9.39	8.86	16.79	17.86	15.02	17.42	36.49	37.87	28.24	27.77	15.36	16.48	18.15	18.92
AT1G09970	48.63	52.97	52.12	65.2	87.8	67.64	97.97	58.85	57.13	60.58	64.62	54.15	69.54	65.72	63.2	68.49	75	59.68	61.11	72.89
AT1G09980	16.21	17.11	17.35	24.99	21.75	20.81	26.77	17.58	20.62	20.71	24.2	22.83	20.99	18.22	20.33	22.07	20.15	16.08	19.32	18.67
AT1G09995	0	0.19	0.4	0	0	0	0	0	0	0	0	0	0	0	0	0	0	0	0	0
AT1G10000	0	0.14	0	0	0	0	0	0	0	0	0	0	0	0	0	0	0	0	0	0
AT1G10010	0	0	0.55	0.28	0	0	0.33	0.13	0.22	0.23	0.41	0.28	0.2	0	0.17	0.07	0.21	0.07	0.08	0.08
AT1G10020	16.42	18.52	9.17	12.92	17.93	16.83	14.91	9.94	18.11	15.13	9.45	11.93	14.21	13.62	14.54	14.91	22.51	19.16	19.56	19.02
AT1G10030	43.79	45.91	38.64	52.51	34.89	38.47	27.35	42.96	54.73	58.39	49.76	50.22	47.49	44.17	42.6	37.28	35.3	30.23	38.6	35.32
AT1G10040	6.58	7.55	6.85	8.37	8.97	8.48	7.94	10.93	7.13	7.23	7	6.4	8.16	7.25	6.49	7.47	5.45	6.74	7.98	7.74
AT1G10050	8.05	10.24	6.98	10.87	12.78	11.23	12.42	11.42	9.07	9.05	9.29	8.43	13.33	10.69	10.73	10.86	11.54	10.46	11.87	11.84
AT1G10060	3.65	5.22	13.12	18.85	3.96	3.51	9.45	12.31	5.01	5.27	21.87	19.84	0.26	0.27	0.72	0.64	2.25	1.02	2.42	1.72
AT1G10070	10.92	16.06	19.27	12.22	10.55	8.58	10.74	3.35	10.65	12.35	8.61	6.46	6.83	8.01	4.98	4.85	17.94	13.98	12.94	17.38
AT1G10090	13.66	13.59	8.86	11.51	17.8	14.48	15.92	9.1	15.06	15.12	10.07	9.31	16.18	14.64	14.83	15.89	21.12	17.59	18.42	18.4
AT1G10095	3.9	5.04	6.01	5.98	3.57	5.12	5.15	3.47	6.36	5.14	6.28	4.45	5	5.29	4.69	6.01	4.7	4.99	4.92	5.24
AT1G10100	0	0.62	0	0.34	0	0.2	0.24	0.72	0.26	0	0	0	0.72	0.36	0.89	0.26	0	0	0	0.57
AT1G10110	10.34	10	13.34	13.98	12.41	12.34	12.39	13.73	13.09	15.59	16.34	16.44	12.54	16.41	12.33	14.96	15.12	11.57	13.23	11.99
AT1G10120	18.38	20.9	28.35	30.12	21.28	22.97	23.43	33.04	26.92	30.39	35.89	32.67	23.06	22.42	19.7	18.26	21.32	19.6	20.28	20.24
AT1G10130	17.41	21.31	23.31	27.82	25.26	25.38	29.03	22.53	32.13	28.93	31.93	31.91	32.38	31.16	23.74	28.66	27.18	25.5	25	26.95
AT1G10140	33.88	38.73	87.65	67.64	51.84	31.03	90.57	52.94	34.71	31.26	47.93	38.84	11.11	10.08	11.09	16.12	44.44	28.34	31.17	37.59
AT1G10150	9.55	11.47	12.44	15.91	13.76	10.33	15.59	13.03	11.64	10.69	13.63	12.82	10.79	7.29	9.48	9.22	12.42	10.47	10.59	13.17
AT1G10155	0.56	1.05	0.84	0.57	3.22	1.56	1.21	1.83	0.89	1.17	0.62	0	0.3	0	0.5	0.9	0.95	0.67	1.65	1.92
AT1G10160	0.27	0.21	0.52	0.68	0.09	0.07	0.28	0.2	0.46	0.32	1.31	1.02	0.06	0.06	0.25	0.44	0.06	0.11	0.05	0.12
AT1G10170	11.6	12.92	11.71	16.82	19.16	15.74	21.67	15.64	15.5	14.61	18.54	18.32	12.22	13.02	11.33	16.55	17.94	15.53	16.18	15.51
AT1G10180	7.9	9.45	12.01	12.6	10.3	10.22	11.73	13.9	10.89	13.63	14.32	16.95	10.74	12.64	9.7	12.76	10.87	10.08	10.79	10.19
AT1G10190	0	0	0	0	0	0	0	0	0	0	0	0	0	0	0	0	0	0	0.09	0
AT1G10200	238.42	277.23	175.53	193.56	299.9	253.12	204.22	192.25	213.09	231.41	162.79	139.6	204.28	203.49	205.77	214.91	301.6	247.08	293.76	288.34
AT1G10210	8.12	7.3	9.12	8.92	11.74	7.3	13.12	8.23	6.82	6.53	6.05	6.58	8.75	8.34	7.6	5.71	8.98	7.3	7.57	7.71
AT1G10220	1.76	2.32	0.18	1.09	1.75	1.54	0.51	0.39	0.84	0.44	0.79	0.36	1.15	1.92	0.95	1.56	0.8	2.68	2.54	1.68
AT1G10230	7.39	6.61	10.53	14.12	8.34	6.62	8.09	18.94	9.35	8.91	11.88	15.09	9.82	8.85	7.14	9.58	8.77	6.2	9.94	8.57
AT1G10240	3.8	3.37	5.05	6.08	6.19	5.08	6.16	5.94	5.37	6.36	4.86	7.39	6.24	5.6	4.73	6.72	3.74	5.03	4.95	6.39
AT1G10250	0	0	0	0	0	0	0	0	0	0	0	0	0	0	0	0	0	0	0	0
AT1G10260	0	0	0	0.21	0	0	0.15	0	0	0	0	0	0	0	0	0	0	0	0	0
AT1G10270	1.55	1.37	2.32	2.89	1.86	2.06	2.49	3.56	4.41	5.21	6.3	7.97	5.55	5.16	5.29	7.26	1.65	2.04	1.99	2.32
AT1G10280	3.38	3.17	3.81	3.2	3.12	3.62	4.12	3.59	4.69	3.95	4.3	3.95	5.29	4.79	4.03	5.18	2.9	2.11	3.49	3.33
AT1G10290	36.19	42.58	36.39	51.48	44.23	47.82	42.75	48.76	71.59	72.23	75.33	72.77	59.01	56.39	52.12	63.46	49.25	46.64	56.29	57.57
AT1G10300	0.31	0.29	0.81	1.02	0.2	0.19	0.09	0.45	0.74	0.77	0.83	0.62	0.54	0.34	0.61	0.35	0.35	0.4	0.58	0.64
AT1G10310	10.34	12.76	18.49	13.83	11.98	11.91	13.52	18.22	20.42	22.33	25.14	22.72	21	22.05	17.1	24.1	17.98	15.68	15.56	14.93
AT1G10320	3.51	5.54	6.72	8.49	5.33	5.2	6.75	7.91	7.24	9.68	7.77	8.36	9.21	8.75	6.49	9.21	5.35	5.75	6.42	6.5
AT1G10330	0.75	0.79	1.51	0.67	0.77	0.87	1.56	0.89	1.42	0.7	1.88	1.51	1.02	1.12	1.44	1.13	1.06	1.12	1.19	1.29
AT1G10340	1.42	1.76	2.47	2.19	1.6	1.49	2.4	1.79	2.19	1.56	1.8	2.93	0.73	0.63	0.36	0.83	0.95	1.14	1.31	1.34
AT1G10350	12.71	14.01	16.21	17.72	17.67	15.27	16.72	19	16.5	16.3	16.75	17.16	16.53	14.58	15.21	12.92	16.86	12.02	13.8	14.24
AT1G10360	5.82	10.65	6.17	5.36	13.15	11.34	8.98	5.25	7.21	6.79	2.91	4.17	3.67	3.67	3.87	5.3	27.88	17.4	19.21	17.86
AT1G10370	19.45	22.45	23.04	21.96	27.16	24.04	28.91	20.23	22.48	24.05	21.87	22.21	18.69	15.92	17.01	24.09	53.39	39.26	47.16	40.06
AT1G10380	13.08	16.25	24.6	25.28	31.24	28.68	30.33	25.77	31.15	29.48	32.82	29.87	31.55	33.16	35.62	34.01	54.89	45.36	45.36	52.45
AT1G10385	1.12	1.26	0.45	1.34	0.83	1.29	0.69	1.38	1.12	1.08	0.81	1.69	1.4	1.77	1.26	0.9	0.25	0.31	0.66	0.58
AT1G10390	16.1	19.92	23.56	25.79	24.62	25.01	29.95	25.8	35.7	33.7	39.29	38.78	32.72	30.22	29.82	39.26	28.87	26.56	26.54	30.09
AT1G10400	3.79	5.81	2.88	4.57	4.73	5	3.48	5.58	5.45	5.79	6.39	5.87	4.62	6.45	5.42	4.99	2.51	3.03	4.46	3.27
AT1G10410	48.42	50.06	49.99	55.56	58.73	50.37	51.99	42.88	56.45	55.37	47.48	41.93	58.29	55.75	53.98	54.18	51.71	48.74	53.03	55.35
AT1G10417	0.32	0.89	0.72	1.14	0.91	0.84	0.86	0.81	1.13	1.85	1.15	1.19	1.72	1.55	1.07	2.04	0.98	1.01	1.34	1.5
AT1G10419	0	0	0	0	0	0	0	0	0	0	0	0	0	0	0	0	0	0	0	0
AT1G10430	40.44	47.4	41.22	42.98	39.55	38.63	40.93	45.07	39.96	44.75	42.51	41.38	39.76	38.9	32.52	34.13	36.41	36.24	46.02	39.48
AT1G10440	0	0	0	0	0	0	0	0	0	0	0	0	0	0	0	0	0	0	0	0
AT1G10450	4.29	5.85	6.89	8.31	6.18	7.03	8.98	7.73	11	11.62	12.6	12.37	10.98	9.5	9.04	10.96	7.73	7.08	7.96	8.68
AT1G10455	0	0	0	0	0	0	0	0	0	0	0	0	0	0	0	0	0	0	0	0
AT1G10460	1.64	2.32	3.45	2.68	3.39	3.67	2.28	2	1.64	2.64	2.29	2.21	2.54	1.94	2.22	2.85	2.48	1.32	0.93	1.54
AT1G10470	92.09	100.6	74.57	88.13	111.01	104.26	94.39	86.31	78.32	78.52	61.1	59.08	83.5	65.55	76.07	75.18	107.19	80.99	91.56	96.38
AT1G10480	9.75	10.2	7.77	5.59	12.88	11.35	11.99	6.86	10.36	7.94	6.91	4.62	11.82	11.39	9.27	9.1	14.96	11.21	12.65	11.22
AT1G10490	8.94	10.06	9.84	11.53	12.85	12.35	13.31	10.64	16.77	18.64	18.24	20.28	21.46	21.93	16.5	19.57	15.02	13.87	14.94	17.07
AT1G10500	35.27	37.98	43.86	43.17	38.84	35.04	38.63	32.84	44.27	39.64	39.93	46.93	50.32	45.71	48.37	46.69	44.4	36.84	39.87	38.21
AT1G10510	11.16	12.43	17.55	20.51	15.41	15.68	19.12	18.64	20.52	23.71	25.19	26.87	18.33	17.36	15.96	19.22	18.77	20.78	20.58	21.62
AT1G10520	0.65	0.38	1.48	1.43	0.94	1.17	1.24	1.25	1.5	1.64	1.64	2.72	3.02	2.14	1.99	2.9	1.11	0.98	1.18	1.34
AT1G10522	17.08	13.42	19.32	24.95	10.17	15.51	14.23	21.74	26.82	26.36	36.25	44.17	18.67	19.71	20.32	27.31	12.67	17.37	16.95	17.6
AT1G10530	1.65	1.94	2.08	2.27	1.82	2.22	1.19	1.8	2.41	3.22	1.38	1.25	3.89	4.2	3.1	2.55	2.8	2.31	2.56	3.33
AT1G10538	0	0	0	0	0	0	0	0	0	0	0	0	0	0	0	0	0	0	0	0
AT1G10540	0.52	0.86	0.33	0.61	0.22	0.41	0.62	0.24	1.46	1.26	0.8	0.86	3.99	4.15	2.43	2.59	0.44	0.79	0.94	0.74
AT1G10550	117.65	121.66	81.28	83.96	95.14	86.37	69.45	81.14	92.39	79.75	72.4	57.99	42.43	39.34	38.81	35.82	64.89	55.58	76.28	59.92
AT1G10560	2.12	2.88	3.52	4.85	4.54	4.25	4.61	4.93	4.35	3.89	4.49	3.52	2.82	3.12	2.25	3.5	3.83	3.05	2.78	2.98
AT1G10570	8.78	8.84	11.4	12.92	12.08	10.97	13.62	11.75	12.04	14.05	13.67	12.69	18.23	15.83	13.53	16.01	9.98	9.92	10.28	11.18
AT1G10580	14.8	20.36	20.71	27.14	18.35	19.55	22.39	29.98	29.06	30.32	36.46	37.72	30.55	30.52	25.9	31.59	18.33	18.79	20.77	19.55
AT1G10585	0	0	0	0	0	0	0	0	0	0	0	0	0	0	0	0	0	0	0	0
AT1G10586	0	0	0	0	0	0	0	0	0	0	0	0	0	0	0	0	0	0	0	0
AT1G10588	0	0.46	0.92	0.26	0	0	0.55	1.09	0.18	0	1.7	1.28	0	0	0	0	0	0	0	0
AT1G10590	144.72	144.1	203.23	202.97	145.23	139.08	161.83	196.65	170.79	172.74	217.4	205.89	162.3	165.32	154.23	156.03	136.35	128.59	149.3	139.19
AT1G10600	11.7	17.67	20.22	17.69	13.62	14.49	20.07	18.53	14.65	19.26	17.82	16.9	15.52	16.87	10.56	12.46	16.1	14.27	13.33	14.37
AT1G10610	1.59	2.6	3.48	3.99	1.14	1.42	2.46	1.26	1.38	2.43	3.85	3.69	0.83	0.6	0.44	0.67	3.12	2.71	2.34	2.93
AT1G10620	0	0	0	0	0	0	0	0	0	0.05	0	0	0	0	0	0	0	0	0	0
AT1G10630	192.96	192.98	191.87	223.27	174.21	174.91	149.38	183.34	216.69	212.19	219.02	220.89	184.58	183.57	178.26	166.5	171.81	158.23	205.36	177.32
AT1G10640	6.96	11.18	1.01	1.92	9	10.54	1.35	2.3	10.02	10.92	2.72	1.88	4.45	5.09	3.38	4.57	17.6	16.66	14.96	18.31
AT1G10650	27.12	29.97	34.05	33.66	26.08	23	29.51	32.26	33.19	28	35.96	33.5	30.72	26.3	27.33	23.79	34.32	24.27	30.56	28.98
AT1G10652	0	0	0	0	0	0	0	0	0	0	0	0	0	0	0	0	0	0	0	0
AT1G10657	0.16	0.18	0.7	0.2	0.86	0.29	0.38	0.59	0.42	0.29	0.39	0.38	0	0.21	0	0	0.94	0.42	0.81	1.21
AT1G10660	27.47	26.85	36.21	30.58	36.29	30.59	38.25	22.82	25.23	26.64	27.73	25.18	39.44	40.26	32.93	32.96	40.32	31.91	30.02	30.62
AT1G10670	265.35	292.11	262.37	312.37	296.74	285.57	252.09	319.84	325.02	331.09	344.77	316.78	301.28	299.01	271.82	279.48	299.93	267.04	325.66	307.64
AT1G10680	0	0.03	0	0	0	0	0	0	0	0.06	0.04	0	0	0	0	0	0	0.03	0.06	0
AT1G10682	199.35	222.78	349.78	283.12	327.84	346.05	398.03	462.23	245.15	270.61	203.1	160.79	304.66	227.07	308.61	288.58	341.69	282.43	329.81	344.22
AT1G10690	4.41	4.8	5.61	6.7	4.99	4.19	5.2	3.56	6.11	6.8	4.15	5.38	6.83	4.56	4.8	3.92	4.47	3.9	6.49	4.01
AT1G10700	20.18	22.35	18.94	21.42	23.97	22.15	19.81	17.59	21.8	23.13	21.09	23.74	32.08	30.57	30.19	31.54	24.09	24.77	25.12	23.78
AT1G10705	0	0	0	0	0	0	0	0	0	0	0	0	0	0	0	0	0	0	0	0
AT1G10710	0.19	0.09	0.19	0	0	0.06	0	0	3.93	4.35	4.98	3.81	1.21	1.93	1.43	1.5	0	0.37	0	0.08
AT1G10717	0	0	0	0	0	0	0	0	0	0	0	0	0	0	0	0	0	0	0	0
AT1G10720	28.18	30.78	30.97	33.26	41.9	30.3	36.23	31.94	29.79	29.15	25.72	22.51	29.99	25.19	24.88	28.65	37.77	30.61	30.36	34.31
AT1G10730	9.58	9.29	8.19	7.32	8.84	8.46	10.01	9.91	7.23	8.7	6.9	7.79	7.54	5.85	4.83	6.9	10.02	7.84	9.34	8.1
AT1G10740	58.78	69.19	80.4	93.37	79.52	66.36	96.92	92.52	79.58	78.84	102.61	89.43	58.39	53.09	50.28	56.92	57.93	55.29	57.55	58.06
AT1G10745	0	0	0	0	0	0.6	0	0	0	0	0	0	0	0	0	0	0	0	0	0
AT1G10747	0	0	0	0	0	0	0	0	0	0	0	0	0	0	0	0	0	0	0	0
AT1G10750	1.48	1.52	1.63	3.65	2.44	2.71	1.82	2.53	1.94	3.27	2.63	1.86	3.77	3.62	3.13	2.68	3.67	3.19	3.06	3.89
AT1G10760	13.18	14.65	14.52	19.52	18.07	20.87	20.32	22.2	24.02	31.26	26.75	32.83	43.1	39.61	31.42	45.07	19.66	22.18	19.72	23.28
AT1G10770	0.18	0	0	0.19	0	0	0.4	0.27	0	0	0.2	0	0	0.6	0	0	0	0.15	0	0.16
AT1G10780	4.71	5.85	4.3	7.88	5.29	6.04	4.52	7.65	9.8	10.49	9.73	10.95	7.46	7.87	6.99	7.9	6.64	8.41	7.84	9.08
AT1G10790	0.81	0.51	0.41	0.42	3.12	1.09	1.37	0.39	0.86	0.57	0.45	0.14	0.74	0.59	1.1	0.65	2.14	1.73	2.63	2.22
AT1G10800	1.94	1.46	1.17	2.4	3.85	4.1	4.2	2.55	4.33	1.95	3.03	1.57	2.96	3.38	2.43	4.04	1.76	2.79	3.29	2.68
AT1G10810	3.08	3.19	1.92	3.83	5.61	6.14	2.08	2.32	5.08	4.62	3.08	3.1	6.12	5.67	5.17	5.13	3.24	3.14	4.32	4.13
AT1G10820	10.16	11.95	14.23	18.64	12.83	12.42	16.76	11.56	17.41	18.84	19.03	20.55	18.53	18.03	16.1	17.47	15.65	16.42	14.94	13.54
AT1G10830	16.78	15.2	17.72	18.31	18.96	15.02	17.04	11.91	26.2	26.18	30.19	33.36	16.39	19.15	16.57	18.07	16.35	17.31	19.62	16.94
AT1G10840	76.23	82.74	105.65	115.42	79.67	89.92	91.18	113.03	100.14	117.77	136.7	131.84	130.66	120.96	100.7	107.38	90.17	86.42	95.34	88.47
AT1G10850	15.17	16.78	17.66	22.88	20.67	20.07	21.26	24.9	27.51	27.32	27.08	27.42	23.52	19.86	18.09	20.44	22.87	22.26	23.82	21.98
AT1G10865	34.73	45.07	44.36	45.11	39.36	40	37.19	56.48	31.67	35.5	40.02	33.46	52.9	44.58	39.56	42.31	34.75	31.78	32.08	32.86
AT1G10870	17.01	18.99	17.02	22.65	20.39	20.74	18.92	20.8	26.69	26.33	27.26	26.28	25.76	22.69	21.68	24.15	17.79	20.3	19.13	22.43
AT1G10880	0	0	0.13	0	0	0.28	0.05	0.09	0	0	0.14	0.06	0.34	0.41	0.57	0.31	0.07	0.1	0.05	0.11
AT1G10890	20.56	28.88	27.75	31.78	34.13	27.92	32.05	38.66	35.11	40.22	33.84	32.6	40.05	38.3	32.81	42.75	24.45	26.88	27.58	26.95
AT1G10900	16.24	17.48	13.86	19.33	21.01	19.76	17.72	19.68	21.72	21.12	20.77	19.83	25.22	22.77	21.94	23.05	21.02	17.5	21.65	23.42
AT1G10910	5.5	6.51	11.71	10.39	8.23	8.53	12.14	8.14	11.34	15.91	13.36	16.81	14.22	13.83	11.08	15.03	11.4	11.66	11.27	13.09
AT1G10920	0.96	1.22	1.11	1.18	1.6	1.53	2.57	1.39	0.81	1.1	0.95	0.86	0.94	0.98	0.84	0.92	1.58	1.59	1.6	1.69
AT1G10930	3.31	4.5	5.11	7.57	4.06	4.87	5.32	8.94	8.94	10.39	12.53	14.25	6.25	6.66	6.01	10.24	4.64	6.35	5.67	6.74
AT1G10940	42.03	49.3	64.98	69.33	54.9	50.46	62.57	66.49	62.16	64.36	68.06	66.55	62.36	55.33	61.05	61.06	59.43	47.74	56.61	56.66
AT1G10950	79.56	85.8	100.04	127.84	93.45	100.91	103.9	89.46	128.53	131.27	136.28	125.02	104.36	108.53	88.64	103.09	101.13	95.34	106.08	110.2
AT1G10960	121.13	131.37	223.75	189.9	151.14	174.68	192.55	216.55	195.79	237.17	285.44	365.18	98.92	115.06	140.53	167	229.61	246.18	248.79	232.52
AT1G10970	16.41	13.87	11.86	15.26	8.48	7.97	8.44	10.98	9.81	9.36	10.89	8.66	10.82	9.65	9.41	9.51	11.51	8.15	9.91	10.77
AT1G10980	0	0.06	0.07	0	0	0	0	0	0	0	0	0	0	0	0	0	0	0	0	0
AT1G10990	3.05	3.46	2.39	4.71	1.4	2.21	1.72	4.2	5.24	4.49	3.97	4.27	1.11	1.85	1.68	2.67	0.96	2.57	2.44	2.73
AT1G11000	44.65	51.13	48.8	53.28	51.79	44.65	53.52	41.43	50.61	47.59	48.38	36.99	32.95	33.97	26.99	27.31	49.35	43.66	53.23	49.01
AT1G11010	0	0	0	0	0	0	0	0	0	0	0	0	0	0	0	0	0	0	0	0
AT1G11020	26.3	25.75	25.55	24.81	30.59	24.74	29.82	18.97	25.73	22	26.36	27.83	27.33	29.53	24.92	22.27	25.87	19.73	23.54	26.04
AT1G11030	0	0	0	0	0	0	0	0	0	0	0	0	0	0	0	0	0	0	0	0
AT1G11040	0.4	0.75	0.4	0.72	0.17	0.63	0.29	1.1	0.24	0.42	0.34	0.51	0.77	0.22	0.82	0.73	0.57	0.16	0.43	0.43
AT1G11050	4.6	4.38	4.75	4.69	6.5	5.32	6.8	5.05	4.91	4.87	4.89	4.25	5.37	4.85	4.51	5.06	6.08	4.58	4.09	5.33
AT1G11055	0	0	0	0	0	0	0	0	0	0	0	0	0	0	0	0	0	0	0	0
AT1G11060	5.94	7.13	6.87	7.78	7.56	7.68	8.49	6.41	8.34	8.33	10.67	10.08	10.27	8.34	7.34	8.57	8.08	6.47	6.4	7.79
AT1G11070	0.05	0.05	0	0.05	0.08	0	0.04	0	0.04	0	0	0	0.06	0	0	0	0	0	0	0.04
AT1G11080	0.39	0.31	0.39	0.61	1.02	0.91	0.73	0.82	0.49	0.71	0.6	0.16	1.65	1.43	1.31	2.36	0.45	0.7	0.33	0.87
AT1G11090	9.83	10.96	9.78	11.19	9.63	10.6	9.78	11.08	13.05	15.87	9.57	9.91	9.21	9.48	11.34	11.43	10.47	7.87	9.21	10.77
AT1G11100	1.04	1.01	0.96	1.16	1.64	0.95	2.1	1.33	1.85	1.74	1.45	2.05	2.79	2.2	1.9	2.34	1.43	1.24	1.38	1.53
AT1G11110	0	0	0	0	0	0	0	0	0	0	0	0	0	0	0	0	0	0	0	0
AT1G11112	0	0.37	0.59	0.4	0	0	0.14	0.57	0.47	0.33	0	1.18	0.64	0.64	0.88	1.1	0	0.47	0.17	0.17
AT1G11120	39.85	48.04	15.17	15.51	41.47	34.32	18.33	16.59	43.89	39.81	14.18	13.69	20.59	23.8	25.44	28.26	50.13	48.36	62.07	55.79
AT1G11125	10.42	9.94	4.2	4.45	8.61	6.77	3.56	9.77	6.65	8.1	6.32	6.91	8.27	9.59	6.98	7.44	5.05	5.72	7.95	4.89
AT1G11130	1.18	1.4	1.67	1.98	2.1	2.05	1.69	2.04	3.85	4.69	3.96	4.19	3.29	3.11	3.32	3.04	3.07	3.11	3.19	3.6
AT1G11145	0	0	0	0	0	0	0	0	0	0	0	0	0	0	0	0	0	0	0	0
AT1G11150	0	0.04	0.1	0	0	0.06	0	0	0	0	0	0	0	0	0	0	0	0	0	0
AT1G11160	1.3	1.34	0.75	1.6	1.5	2.2	0.87	1.37	2.2	1.68	1.19	1.5	3.04	2.76	2.67	2.86	1.54	1.61	1.87	2.13
AT1G11170	3.61	3.75	2.9	3.19	3.43	3.37	2.75	4.21	3.51	4.4	2.48	2.77	4.84	3.62	3.93	4.47	2.73	2.93	4.64	5.25
AT1G11175	32.56	31.78	29.57	21.81	33.55	21.92	32.59	23.87	17.74	19.06	16.49	16.51	84.49	70.26	38.62	35.68	24.16	20.78	15.84	21.06
AT1G11180	9.03	11.58	9.22	9.19	9.48	8.4	11.23	7.95	10.3	11.88	12.82	10.52	9.84	10.89	11.74	9.56	11.15	8.55	8.45	8.12
AT1G11185	11.36	13.5	48.48	36.03	15.31	10.41	45.33	38.83	14.29	9.51	33.38	25.32	8.47	6.84	11	12.48	5.08	3.34	4.81	5.42
AT1G11190	6.25	8.71	10.17	11.27	13.59	11.93	9.14	3.64	8.98	9.06	7.67	8.3	10.32	8.64	11.56	9.83	17.55	20.43	20.84	22.43
AT1G11200	18.86	15.97	19.46	23.15	17.5	18.05	17.55	12.05	22.67	19.58	22.87	21.84	27	22.24	20.38	19.25	19.22	15.85	16.09	18.83
AT1G11210	13.86	16.95	27.91	24.37	24.7	17.26	48.24	24.77	14.84	13.07	22.84	13.67	7.9	5.76	7.75	9.05	12.32	8.9	10.44	12.18
AT1G11220	1.36	1.16	1.62	1.27	0.61	1.54	0.81	2.16	2.37	2.9	2.9	3.87	1.08	2.56	1.12	1.6	1.82	3.27	2.93	2.46
AT1G11230	0	0	0	0	0	0	0	0	0	0	0	0	0	0	0	0	0	0	0.1	0
AT1G11240	26.46	34.43	47.12	39.57	29.58	35.65	33.54	73.41	36.31	45.91	45.57	49.63	48.85	50.53	41.44	50.45	23.36	29.7	36.93	31.38
AT1G11250	0.16	0.15	2.97	2.72	0.26	0.29	1.91	0.9	0	0	2.25	1.56	0	0	0	0	0	0.25	0	0.4
AT1G11260	89.79	100.13	123.64	114.51	120.97	115.38	142.94	66.75	109.73	97.24	100.44	98.08	72.73	68.99	67.12	71.28	105.42	89.48	93.77	100.02
AT1G11265	0	0	0	0	0	0	0	0	0	0	0	0	0	0	0	0	0	0	0	0
AT1G11270	2.55	3.61	3.4	4.55	4.73	2.78	4.6	3.11	6.34	4.62	6.43	6.98	4.7	6.44	4.78	4.41	4.06	3.88	4.15	4.74
AT1G11280	12.15	14.47	14.17	17.31	11.92	11.73	11.05	13.91	18.47	19.18	19.57	18.25	14.19	13.63	12.61	14.22	15.67	17.18	18.51	17.39
AT1G11290	0.31	0.44	0.78	0.96	0.43	0.71	0.34	0.57	0.87	1.3	1.27	2.15	0.96	0.79	0.84	0.88	0.94	0.96	0.97	0.72
AT1G11300	2.31	2.95	2.18	2.92	3.85	2.53	2.48	1.94	4.37	5.02	4.32	3.17	7.97	7.51	4.85	6.06	2.99	2.81	2.81	3.37
AT1G11310	39.17	39.84	45.29	44.34	53.81	44.5	49.16	37.8	45.37	48.78	45.53	39.85	55.31	51.15	44.36	45.38	54.54	41.14	45.53	51.6
AT1G11320	0.93	1.36	2.31	2.54	0.98	1.22	1.23	3.09	1.76	2.27	2.75	3	2.77	2.41	3.22	2.12	1.34	0.95	1.87	1.69
AT1G11330	0.34	0.52	1.45	1.65	0.65	0.44	1.65	1.02	0.21	0.15	0.29	0.6	0.14	0.19	0.24	0.31	0.43	0.45	0.67	0.48
AT1G11340	0.09	0.04	0.19	0.29	0	0.2	0.27	0.14	0.19	0.12	0.21	0	0.4	0.51	0.38	0.3	0.26	0.07	0.16	0.24
AT1G11350	3.23	4.05	2.17	2.03	6.42	4.05	4.62	1.98	3.55	4.15	1.46	1.79	3.77	4.3	3.94	4.88	7.41	4.54	5.44	5.1
AT1G11360	37.09	46.69	40.72	52.94	46.02	39.86	48.98	55.87	48.94	47.06	47.94	46.01	42.23	39.66	41.78	38.58	47.24	42.37	47.36	42.62
AT1G11362	0	0.2	0.21	0	0	0	0	0	0	0	0.24	0	0.23	0	0	0	0	0	0	0
AT1G11370	0	0	0.16	0.5	0.27	0.5	0.12	0.59	0.39	0.54	0.54	0.16	0.53	0	0.44	0.52	0	0.26	0.27	0.28
AT1G11380	16.21	19.7	16.81	14.44	24.56	21.78	17.31	10.31	21.6	20.19	9.12	10.83	18.18	15.96	16.38	14.25	24.54	19.42	21.49	21.92
AT1G11390	8.4	7.04	9.07	9.7	7.98	8.21	9.46	11.59	11.89	10.27	12.58	13.4	12.16	9.62	9.32	11.83	7.91	8.47	10.54	8.88
AT1G11400	30.88	30.79	32.74	33.21	37.26	33.48	30.71	48.5	33.01	37.35	28.08	30.15	32.42	29.45	23.32	32.84	34.52	29.89	34.21	32.33
AT1G11410	4.62	8.2	3.06	3.61	8.56	6.75	5.09	2.59	5.67	5	3.08	1.84	4.52	4.49	4.35	4.6	12.46	7.63	9.94	10.67
AT1G11420	0.78	0.66	0.57	1.82	1.17	1.28	1.54	1.34	2.37	3.02	3.24	3.64	3.55	4.48	3.58	4.06	1.28	1.59	1.14	1.9
AT1G11430	44.38	53.94	90.7	85.49	45.61	62.73	70.07	94.44	65.82	81.42	99.26	127.87	56.52	66.89	56.3	71.89	71.96	74.29	77.46	67.61
AT1G11440	12.8	15.65	12.58	11.09	16.94	14.3	12.37	11.55	14.43	16.74	9.07	8.4	14.6	10.76	11	10.08	22.86	15.05	16.88	19.06
AT1G11450	2.3	0.6	1.88	2.31	2.45	1.33	2.48	1.09	1.16	1.68	1.03	2.52	0.63	0.92	1.22	0.98	3.4	3.04	3.7	3.86
AT1G11460	0.13	0.13	0	0	0	0	0.1	0	0	0	0.15	0	0.29	0.15	0	0.11	0.3	0	0.11	0
AT1G11470	0	0	0	0	0	0	0	0	0	0	0	0	0	0	0	0	0	0	0	0
AT1G11475	29.06	34.05	44.47	41.53	23.56	26.94	35.86	58.03	35.86	43.87	41.95	44.8	43.62	38.85	37.19	42.53	33.23	31.78	29.29	29.82
AT1G11480	42.85	48.16	54.51	64.34	59.47	53.9	60.81	71.1	60.03	61.17	67.54	63.67	59.07	57.92	46.35	58.26	51.82	51.38	52.73	58.69
AT1G11482	0	0.23	0	0.49	0.2	0.37	0.26	0.26	0.48	0.2	0.67	0.48	1.31	0.26	0.11	0.39	0.54	0.77	0.61	0.52
AT1G11490	0.74	0.92	0	1.01	1.02	1.68	0.45	0.36	0.98	1.03	0.27	0.87	1.47	1.88	1.33	1.59	1.25	0.69	1.36	1.28
AT1G11500	1.95	0.52	2.25	0.86	2.3	1.39	2.62	2.44	2.44	1.63	1.87	1.41	2.43	3.04	0.25	1.79	5.05	4.01	3.31	4.33
AT1G11510	0	0	0	0	0	0	0	0	0	0	0	0	0	0	0	0	0	0	0	0
AT1G11520	0	0	0	0	0	0	0	0	0	0	0	0	0	0.28	0	0	0	0	0	0
AT1G11530	15.53	17.4	27.56	20.32	22.81	18.25	27.27	14.75	9.24	12.8	13.49	10.19	10.21	9.41	7.09	6.94	16.74	13.8	14	11.07
AT1G11540	1.5	1.69	2.32	2.17	1.49	2.68	1.96	1.9	2.08	1.51	1.79	2.63	2.94	1.97	2.44	1.94	1.81	1.68	1.78	1.99
AT1G11545	502.03	517.09	266.52	313.62	408.86	415.07	243.77	290.3	507.2	513.67	308.64	255.67	376.21	355.46	324.44	335.65	385.51	379.75	491.46	432.74
AT1G11550	0	0	0	0	0	0	0	0	0	0	0	0	0	0	0	0	0	0	0	0
AT1G11560	0	0	0	0	0	0.08	0	0	0	0	0.15	0	0	0	0.12	0	0	0	0	0
AT1G11570	1.75	2.89	2.65	5.41	5.63	5.44	4.1	3.06	4.27	2.94	1.96	3.97	2.67	1.91	4.31	4.21	7.94	4.89	7.43	9.43
AT1G11572	0	0	0	0	0	0	0	0	0	0	0	0	0	0	0	0	0	0	0	0
AT1G11580	58.48	66.1	79.8	102.64	70.85	88.86	91.29	103.85	113.51	117.63	133.83	127.75	174.13	162.26	164.17	163.39	105.6	99.17	113.63	114.14
AT1G11590	0	0	0	0	0	0	0	0	0	0	0	0	0	0	0	0	0	0	0	0
AT1G11592	18.38	17.73	25.19	22.39	17.73	19.79	27.97	18.08	19.64	20.43	22.22	19.99	19.71	21.93	18.96	19.91	19.09	15.8	21.57	19.03
AT1G11593	0	0	0	0	0	0	0	0	0	0	0	0	0	0	0	0	0	0	0	0
AT1G11595	0	0	0	0	0	0	0	0	0	0	0.14	0	0.14	0	0	0	0	0	0	0
AT1G11600	26.6	27.93	26.78	43.29	30.61	33.36	24.94	45.92	59.03	50.76	57.36	62.45	29.52	34.29	29.94	37.14	25.48	25.44	38.26	28.99
AT1G11608	0	0	0	0	0	0	0	0	0	0	0	0	0	0	0	0	0	0	0	0
AT1G11610	0	0	0	0	0	0	0	0	0	0	0	0	0	0	0	0	0	0	0	0
AT1G11620	0	0	0.12	0	0	0	0	0	0	0	0	0	0	0	0	0	0	0	0	0
AT1G11630	4.68	4.48	7.24	8.3	4.86	4.48	5.84	8.59	7.33	9.57	8.51	7.86	7.17	7.95	7.2	6.78	5.09	5	5.88	4.87
AT1G11640	0	0	0	0	0	0	0	0	0	0	0	0	0	0	0	0	0	0	0	0
AT1G11650	131.78	141.88	162.03	191.31	155.58	139.11	182.33	170.47	176.82	179.57	227.28	227.93	186.9	182.76	176.86	186.14	156.48	130.75	151.68	144.5
AT1G11655	30.44	13.73	6.71	11.76	6.29	9.07	6.41	15.28	5.06	6.64	4.6	7.68	26.61	22.8	21.34	16.04	1.8	3.8	4.57	4.92
AT1G11660	21.26	22.63	19.96	24.38	25.68	24.16	21.67	25.63	29.4	30.1	28.29	30.16	32.55	26.79	29.74	29.69	27.08	25.15	29.13	28.04
AT1G11670	61.8	70.21	50.1	66.15	75.3	75.41	68.68	61.33	67.57	53.25	49.3	49.98	71.17	58.69	74.32	70.54	70.68	60.92	69.72	68.38
AT1G11680	77.86	81.96	92.76	120.11	101.14	99.84	107.18	97.23	109.95	96.13	122.65	115.28	108.42	105.62	101.75	96	101.27	92.35	105.39	101.99
AT1G11684	0	0	0	0	0	0	1.17	0	0	0	0	0	0	0	0	0	0	0	0	0
AT1G11690	0.77	0	0.19	0.4	1.28	0.96	0.42	0.42	0.46	0	0.22	0.59	0.21	0	0.87	0.47	0	0	0.16	0
AT1G11700	13.53	13.77	9.14	12.47	16.57	13.48	14.41	15.32	12.83	12.52	7.64	7.39	10.58	11.12	15.92	17.57	19.63	15.29	16.33	14.59
AT1G11710	0.28	0.62	0.43	0.78	0.55	0.62	0.83	0.45	0.83	0.95	1.32	1.39	1.08	0.67	1.24	1.61	0.59	0.72	0.44	0.82
AT1G11720	3.47	4.68	4.91	7.23	6.2	5.88	6.35	6.67	7.61	10.8	8.01	10.05	13.85	12.08	8.63	11.3	7.48	7.68	6.75	6.99
AT1G11730	1.51	0.98	1.76	1.68	1.15	1.66	0.84	1.27	1.02	1.75	1.17	1.17	2.02	1.65	1.26	1.78	1.45	1.3	1.67	1.81
AT1G11735	87.47	0	0	90.34	0	0	29.49	0	0	0	105.03	0	0	60.93	29.69	0	0	0	0	47.66
AT1G11740	15	17.83	4.18	3.39	13.24	13.84	4.1	3.91	13.45	12.93	3.99	3.03	11.43	10.28	12.26	11.04	16.83	13.09	16.39	16.08
AT1G11750	36.43	40.92	57.22	60.29	48.58	54.11	52.99	67.91	52.15	57.19	69.65	71.48	37.05	44.23	39.31	47.37	54.58	52.31	56.71	59.76
AT1G11755	8.24	7.55	9.09	9.3	6.55	8.28	9.28	6.94	8.55	9.13	12.85	11.11	11.13	8.88	8.33	8.24	7.07	7.31	7.07	7.12
AT1G11760	9.29	9.66	9.52	10.76	7.94	9.29	9.49	14.27	9.39	10.69	11.11	9.87	16.07	15.02	10.91	15.09	10.51	10.48	9.98	12.75
AT1G11765	0	0	0	0	0	0	0	0	0	0	0	0	0	0	0	0	0	0	0	0
AT1G11770	0	0	0	0	0	0	0	0	0	0	0	0	0	0	0	0	0	0	0	0
AT1G11780	7.15	7.71	10.73	10.4	7.3	6.29	9.01	9.5	10.02	9.56	11.43	11.17	10.92	10.95	8.68	7.93	7.29	7.02	8.38	6.92
AT1G11785	0.34	0	0	0	0	0.21	0.24	0.25	1.07	1.41	0.38	0.68	0.37	0	0.91	0.27	0	0	0.29	0
AT1G11790	7.92	9.23	10.36	11.89	12.29	11.49	11.2	9.77	17.8	16.95	19.02	19.18	14.68	14.81	15.17	16.48	13.57	12.42	15.86	13.55
AT1G11800	4.87	5.98	3.95	5.75	6.88	5.53	5.47	5.21	4.7	4.99	5	4.44	6.41	5.92	5.46	4.76	9.15	5.91	7.99	7.14
AT1G11803	0	0	0	0	0	0	0	0	0	0	0	0	0	0	0	0	0	0	0	0
AT1G11806	0	0	0	0	0	0	0	0	0	0	0	0	0	0	0	0	0	0	0	0
AT1G11810	0	0	0	0	0	0.06	0	0.07	0	0	0.11	0	0	0	0	0	0	0.08	0	0
AT1G11820	15.29	17.18	18.88	24.73	15.92	18.23	20.31	16.86	21.93	23.98	24.27	28.91	17.66	19.03	18.89	20.67	25.26	20.94	23.51	22.78
AT1G11840	347.13	351.17	305.5	382.23	428.64	381.83	403.55	467.89	302.1	337.24	344.13	307.09	510.95	423.53	382.49	386.8	395.69	318.23	350.65	373.93
AT1G11850	3.34	6	6.36	5.61	7.8	4.64	6.5	3.42	11.26	15.02	11.58	11.6	1.14	0.69	1.7	1.68	10.09	6.47	5.29	8.08
AT1G11860	152.76	164.67	224.09	230.13	220.23	227.87	227.08	276.46	209.51	264.3	248.06	270.73	159.9	173.8	149.24	170.77	290.94	276.16	277.43	275.55
AT1G11870	6.53	9.46	13.58	14.2	12.94	14.3	13.4	14.62	14.25	19.57	18.45	21.8	13.49	14.09	10.87	15.03	13.93	16.02	15.54	12.41
AT1G11880	4.34	5.5	6.91	10.58	4.42	6.04	7.97	5.21	7.33	7.38	8.06	8.6	8.66	7.97	8.94	7.76	8.34	6.72	5.76	7
AT1G11890	51.63	52	60.57	68.47	48.35	51.29	47.54	67.53	68.32	62.31	64.94	68.51	53.53	51.36	48.98	52.48	51.83	52.8	61.15	54.68
AT1G11900	2.67	2.09	2.69	2.64	1.84	2.43	1.78	3.16	2.75	2.89	3.36	2.92	4.36	4.37	4.52	2.51	2.52	2.05	2.26	2.89
AT1G11905	19.74	19.13	21.25	23.18	20.17	21.51	17.17	19.34	22.17	27.36	19.7	19.65	28.32	23.62	22.37	21.08	22.05	21.44	23.43	21.36
AT1G11910	407.17	453.62	412.88	480.5	529.91	451.35	542.51	375.36	436.09	443.36	416.07	392.49	461.72	443.3	404.39	460.82	597.74	506.4	532.77	581.15
AT1G11915	0.44	0.73	0.89	1.26	0.92	1.87	1.77	1.13	1.15	1.3	0.99	0.56	1.33	1.09	1.5	1.97	1.76	2.04	2.54	2.59
AT1G11920	1.86	0.98	0.82	3.35	0.38	0.8	1.01	1.69	0.37	0.1	0.52	0.47	2.66	1.52	1.68	0.75	0.13	0	0	0
AT1G11925	0	0	0	0	0	0	0	0	0	0	0	0	0	0	0	0	0	0	0	0
AT1G11930	43.88	40.57	43.27	48.72	37.98	46.54	48.05	54.99	57.44	67.44	62.7	61.89	58.81	52.94	46.85	55.86	40.47	38.17	41.97	39.97
AT1G11940	6.1	6.4	7.66	7.02	4.53	6	7.25	7.99	7.41	8.88	8.98	7.85	9.63	8.11	6.63	8.78	8.3	5.45	6.52	7.5
AT1G11950	2.83	3.06	7.15	8.01	4.4	3.27	8.15	6.87	3.85	4.52	10.57	10.04	4.05	3.6	3.17	3.35	3.3	2.78	3.26	3.04
AT1G11960	8.26	10.1	8.46	10.4	10.83	8.97	9.59	5.53	11.94	12.03	11.32	9.37	9.19	7.78	6.74	8.35	14.88	11.98	14.6	15.19
AT1G11970	0	0	0	0	0	0	0	0	0	0	0	0	0	0	0	0	0	0	0	0
AT1G11980	0	0	0	0	0	0	0	0	0	0	0	0	0	0	0	0	0	0	0	0
AT1G11990	0	0	0.15	0	0	0	0	0	0	0	0	0.07	0	0	0.07	0	0.08	0	0	0
AT1G12000	81.41	86.91	100.71	119.97	95.87	113.63	92.58	129.24	147.17	140.95	171.57	166.01	118.86	122.48	114.26	129.34	98.5	95.15	111.87	108.13
AT1G12010	0.82	1.93	2.37	2.22	3.55	3.38	3.05	1.42	2.37	2.23	1.6	1.86	1.56	1.45	1.39	0.99	9.03	4.59	4.95	5.76
AT1G12013	0	0	0	60.6	54.41	0	0	54.93	0	31.08	0	0	0	25.15	28.79	42.86	40.76	17.9	25.92	0
AT1G12015	0	0	0	0	0	0	0	0	0	0	0	0	0	0	0	0	0	0	0	0
AT1G12020	3.51	3.75	6.74	5.09	5.79	5.85	5.2	5.81	6.74	6.8	4.81	8.36	5.9	3.48	5.32	8.09	6.67	5.74	7.43	8.27
AT1G12030	0	0.13	0.42	0.14	0.23	0	0.1	0.1	0	0.23	0.62	0.14	0	0	0.12	0	0	0	0.12	0.24
AT1G12040	38.07	36	21.76	42.68	21.55	32.94	18.46	27.4	35.78	23.98	27.23	39.69	62.78	54.93	66.51	63.11	13.7	15.29	14.38	17.5
AT1G12050	22.31	24.44	36.29	38.33	26.51	30.29	38.41	36.84	32.17	30.34	41.35	39.78	30	27.98	27.12	31.93	28.45	24.55	26.3	24.97
AT1G12060	2.29	5.38	3	4.25	2.65	5.27	3.19	6.02	4.2	6.9	6.39	6.24	4.74	4.5	3.3	6.45	2.59	3.11	3.3	3.56
AT1G12064	13.17	14.53	9.44	8.35	5.02	5.99	3.3	9.43	14.95	15.91	12.73	16.35	22.91	29.28	31.42	28.71	8.9	10.73	13.1	11.15
AT1G12070	5.25	5.15	4.19	5.19	7.96	6.4	3.33	6.07	5.94	9.53	4.65	4.42	7.39	6.21	5.32	7.05	6.44	5.95	4.46	4.73
AT1G12080	2458.85	3086.2	1611.52	1469.64	2813.52	2834.03	1353.41	2646.72	2431.01	2846.13	1393.24	1276.59	1875.31	1866.41	1418.65	1642.17	2588.54	2758.96	3016.3	3001.65
AT1G12090	2436.62	2278.7	1516.29	1486.28	2315.45	2143.54	1266.28	1239.18	2808.4	2173.34	1530.02	1416.98	1784.6	1845.03	2150.52	1880.13	2794.54	2117.63	2497.76	2329.28
AT1G12100	0	0.41	0	0	0	0.27	0.32	0.32	0.35	0.37	0	0	0	0	0	0.35	0	0	0	0.38
AT1G12110	343.69	361.27	289.51	297.12	520.35	414.25	431.81	264.64	445.47	413.15	317.15	270.31	366.46	325.19	317.25	339.74	417.17	329.11	325	376.42
AT1G12120	25.1	27.94	31.86	37.92	36.48	30.91	38.33	37.49	31.66	36.19	30.43	25.25	35.87	33.06	29.63	31.67	32.3	31	32.36	29.41
AT1G12130	2.88	3.67	1.78	2.49	0.77	1.79	1.41	3.79	5.27	5.6	4.36	6.28	16.79	17.67	9.73	10.49	1.37	2.46	4.02	2.49
AT1G12140	34.17	37.98	30.87	30.39	50.01	40.26	41.81	34.86	37.62	36.77	36.01	34.11	33.71	31.73	30.6	35.14	40.42	33.5	37.1	41.2
AT1G12150	3.81	5.16	2.88	6.94	3.75	5.11	3.51	8.27	3.04	3	2.86	3.25	7.01	5.04	5.89	4.67	1.99	1.7	1.99	2.79
AT1G12160	2.23	2.77	3.26	2.38	3.28	4.16	3.4	4.64	2.22	2.06	2.49	3.05	2.86	2.43	2.37	2.44	2.43	1.27	1.48	2.75
AT1G12170	0	0	0	0	0	0	0	0	0	0	0	0	0	0	0	0	0	0	0	0
AT1G12180	0	0	0	0	0	0	0	0	0	0	0	0	0	0	0	0	0	0	0	0
AT1G12190	0	0	0	0	0	0	0	0	0	0	0	0	0	0	0	0	0	0	0	0
AT1G12200	7.82	10.01	9.65	10.27	12.66	11.27	11.85	10.95	15.8	15.2	14.97	15.78	21.12	19.6	18.33	16.65	21.16	22.18	22.88	20.83
AT1G12210	0.38	0.31	0.29	0.83	1.01	0.5	0.96	0.52	0.49	0.51	0.26	0.62	1.8	1.6	1.32	1.11	0.27	0.57	0.52	0.25
AT1G12211	0	0	0	0	0	0	0	0	0	0	0	0	0	0	0	0	0	0	0	0
AT1G12220	0	0	0	0	0	0	0	0	0	0	0	0	0	0	0	0	0	0	0	0
AT1G12230	65.85	77.3	128.22	110.64	99.54	97.57	122	102.91	86.61	87.07	104.43	107.56	65.13	67.79	70.34	65.57	100.35	81.69	82.37	86.48
AT1G12240	89.31	90.44	67.09	76.62	87.26	96.47	62.02	78.54	124.06	124.14	82.87	70.93	92.1	88.92	70.75	94.53	86.65	86.55	102.8	98.94
AT1G12244	2.79	1.97	6.18	4.02	3.23	4.34	4.45	6.61	4.23	6.19	7.16	6.75	5.77	7	5.16	6.3	3.47	4.58	4.73	4.94
AT1G12250	4.92	4.99	13.67	9.33	6.84	10.15	10.13	8.01	9.29	11.6	11.57	14.5	4.5	6.77	5.37	5.95	12.74	14.6	12.7	14.33
AT1G12260	1.3	2.12	3.59	3.39	5.66	5.55	4.23	2.9	5.25	3.78	4.44	3.32	6.12	3.82	4.58	3.04	5.5	4.99	4.88	6.17
AT1G12270	48.31	60.82	59.35	72.5	40.18	58.05	46.44	91.35	66.37	65.39	78.83	79.49	69.47	63.67	65.69	70.79	40.78	42.28	53.92	45.74
AT1G12280	1.03	0.75	1.08	1.25	0.62	0.52	1.73	0.92	1.75	1.6	2.4	2.17	2.24	1.68	1.65	1.96	1.11	0.79	0.75	1.01
AT1G12290	1.24	1.35	1.75	1.56	1.21	0.99	2.01	1.06	1.67	1.77	1.61	2.11	2.94	1.4	1.61	1.97	1.18	0.7	1.13	1.19
AT1G12294	0	0	2.62	2.19	0	0	1.38	0	1.12	0	0	0	0	2.23	0	0.96	0	0	0	0
AT1G12300	0.66	0.92	1.31	1.55	1.26	1.3	1.75	1.31	1.86	1.85	2.02	1.92	1.99	2.14	1.55	2.28	1.31	1.34	0.83	0.95
AT1G12310	233.8	223.43	167.56	177.38	209.89	218.41	148.99	220.89	216.1	251.57	169.68	168.06	201.95	196.54	172.31	192.91	206.59	183.88	243.34	215.04
AT1G12320	7.02	5.34	7.41	6.72	4.7	5.62	5.57	5.85	8.67	13.57	6.72	7.08	7.28	4.93	2.86	5.39	6.43	7.17	8.36	7.51
AT1G12330	34.72	42.17	27.79	30.61	57.85	44.03	33.3	31.11	56.37	53.96	33.78	37.85	52.87	53.62	50.69	60.97	59.86	52.25	56.67	51.01
AT1G12340	28.95	37.29	35.48	34.11	38.67	36.22	32.28	25.1	31.09	36.28	32.18	30.28	45.93	33.67	34.03	30.97	38.3	31.59	38.1	37.79
AT1G12350	36.5	39.75	52.94	57.48	44.53	40.68	50.75	45.35	47.27	51.53	56.72	58.88	52.95	57.06	51.18	51.78	50.66	45.25	49.57	45.38
AT1G12360	41.56	50.44	48.77	53.87	57.41	51.14	54.12	53.03	53.49	54.17	50.78	50.25	58.57	55.01	49.39	52.93	53.45	49.06	51.53	52.61
AT1G12370	0.54	0.56	0.53	0.92	0.77	0.84	0.92	1.63	0.84	1.31	1.58	1.13	1.14	0.98	2.02	1.81	1.77	0.9	1.46	1.42
AT1G12380	0.52	0.45	0.7	1.17	1.58	1.55	1.64	1.81	1.39	1.46	1.41	1.49	1.28	2.05	1.89	1.86	1.62	1.4	1.26	1.28
AT1G12390	7.76	8.99	8.32	8.38	7.37	7.97	7.71	7.46	6.72	6.9	5.53	7.99	6.9	8.04	10.09	7.74	8.59	6	7.17	8.48
AT1G12400	7.21	7.25	12.52	12.04	8.21	8.19	13.3	4.35	14.27	10.82	16.93	16.29	12.73	16.54	14.97	14.19	14.07	9.14	8.85	11.37
AT1G12410	39.27	49.23	64.81	63.47	56.36	53.54	50.74	62.19	52.47	59.31	65.4	72.69	44.95	47.36	37.68	51.51	62.8	65.39	71.18	58.58
AT1G12411	0	0	0	0	0	0	0	0	0	0	0	0	0	0	0	0	0	0	0	0
AT1G12420	5.04	5.32	4.8	6.61	4.56	7.27	6.66	4.53	7.11	7.62	6.78	5.92	7.97	8.07	6.49	6.07	8.51	8.07	8.02	8.6
AT1G12423	0	0	0	0	0	0	0	0	0	0	0	0	0	0	0	0	0	0	0	0
AT1G12430	3.44	4.8	9.31	10.32	7.92	6.39	12.7	11.39	6.27	6.7	11.44	13.19	6.02	5.49	5.13	6.97	6.43	6.45	6.16	6.2
AT1G12440	79.92	84.56	90.54	91.93	104.01	83.32	108.17	75.1	83.62	83.86	81.88	78.09	76.11	79.66	83.26	71.81	104.37	90.72	89.33	91.07
AT1G12450	12.58	11.82	13.73	12.01	14.31	14.45	14.06	9.55	14.25	12	11.17	11.24	12.02	12.28	11.64	10.9	14.35	9.75	10.32	13.03
AT1G12451	0	0	0	0	0	0	0	0	0	0	0	0	0	0	0	0	0	0	0	0
AT1G12460	3.93	4.58	3.73	3.58	6.12	5.11	4.61	4.16	6.31	5.63	5.27	4.31	5.84	5.78	4.82	5.47	6.57	6.27	5.8	6.77
AT1G12470	18.45	20.92	18.54	24.64	24.69	23.81	24.32	19.63	31.01	29.61	28.62	27.8	26.82	21.75	23.59	28.51	24.25	22.37	24.6	25.16
AT1G12480	0.07	0.06	0.14	0.14	0.22	0.3	0.05	0.15	0.05	0.23	0.46	0.89	0	0	0	0	0.31	0.33	0.12	0.18
AT1G12490	0	0	0	0	0	0	0	0	0	0	0	0	0	0	0	0	0	0	0	0
AT1G12500	41.54	43.63	32.55	34.26	51.86	44.09	36.64	26.64	70.59	55.04	39.23	42.57	41.97	37.83	37.45	40.87	62.2	47.18	56.77	56.49
AT1G12510	0	0	0	0	0	0	0	0	0	0	0	0	0	0	0	0	0	0	0	0
AT1G12520	89.02	83.75	104.5	92.96	89.84	77.48	90.01	89.91	78.24	85.86	91.71	86.97	77.5	77.98	62.11	75.87	96.51	91.65	100.85	89.76
AT1G12530	25.17	26.62	30.5	28.16	23.71	25.08	29.17	37.43	21.79	26.5	25.25	19.63	20.35	22.09	18.76	24.22	22.03	24.54	28.67	29.05
AT1G12540	0	0	0	0	0	0	0	0	0	0	0	0	0	0	0.12	0	0	0	0	0
AT1G12550	5.46	5.34	4.47	4.81	4.88	6.23	6.02	5.39	4.9	3.9	3.56	4.36	6.19	5.96	6.26	6.15	6.18	5.1	5.01	5.9
AT1G12560	29.26	28.12	36.39	49.71	18.94	29.05	27.03	49.3	18.52	14.56	21.19	23.27	32.73	27.62	35.77	31.35	11.63	14.98	15.42	15.27
AT1G12570	0.19	0.18	0.06	0.06	0	0.12	0.09	0.14	0.45	0.16	0.07	0.06	0.21	0.14	0.34	0.2	0	0.05	0	0
AT1G12580	39.05	49.28	39.32	45.71	60.96	52.81	48.04	48.09	51.25	50.86	45.04	40.96	49.92	45.2	40.55	48.79	54.84	44.21	51.17	51.16
AT1G12590	0	0	0	0	0	0	0	0	0	0	0	0	0	0	0	0	0	0	0	0
AT1G12600	0.83	0.88	1.04	1.39	1.37	1.55	2.33	1.21	1.41	2.43	1.16	1.78	2.03	2.26	1.78	1.67	2.23	1.41	1.67	2.06
AT1G12610	0.13	0	0	0.13	0	0	0	0	0.2	0	0	0	0	0.14	0	0	0.14	0.3	0.11	0.11
AT1G12620	1.71	2.21	2.69	2.79	2.92	2.34	3.01	3.92	3.32	4.34	4.32	4.34	3.46	3.43	2.8	3.85	2.21	2.6	3.03	3.43
AT1G12630	0.78	0.98	0.26	0.27	2.14	2.9	0.19	1.51	1.86	2.82	1.74	1.05	2.54	3.39	1.63	1.88	1.47	1.45	1.1	1.12
AT1G12640	36	40.98	42.12	43.76	55.83	48.82	48.91	41.39	42.52	39.36	38.78	34.54	35.25	40.52	33.08	38.73	44.16	40.69	41.05	47.91
AT1G12650	13.68	13.48	19.03	21.65	10.85	12.43	12.07	32.64	16.36	21.79	21.53	20.3	24.36	24.9	17.48	20.98	12	11.49	15.06	10.89
AT1G12660	0	0	0	0	0	0	0	0	0	0	0	0	0	0	0	0	0	0	0	0
AT1G12663	0	0	0.54	0	0	0.33	0.39	0	0	1.36	0	0	1.76	1.17	2.88	3.44	0	0	0	0.46
AT1G12665	0	0	0.61	0	0	0.19	0.66	0	0	0	1.7	0	0	0	0	0	0	0	0	0
AT1G12667	0	0	0	0	0	0	0	0	0	0	0	0	0	0	0	0	0	0	0	0
AT1G12669	0	0	0	0	0	0	0	0	0	0	0	0	0	0	0	0	0	0	0	0
AT1G12670	2.67	3.15	4.71	8.26	3.32	1.66	11.08	3.91	2.66	2.8	7.46	4.04	3.64	8.7	6.53	6.38	0.76	0.53	0	0
AT1G12672	3.03	0.42	1.52	2.74	1.48	2.99	2.87	2.9	1.75	4.07	2.47	0.45	3.86	2.37	1.56	1.4	0.29	0	0.38	0.44
AT1G12680	13.76	16.16	13.52	17.79	15.95	15.95	19.59	21.17	15.48	15.99	15.66	14.28	18.73	17.41	16.62	14.85	17.8	13.68	14.86	12.99
AT1G12700	0.51	0.48	0.77	0.94	0.75	0.73	0.66	0.48	0.53	0.89	0.51	0.61	1.11	0.78	0.92	0.9	0.34	0.73	0.77	0.92
AT1G12710	12.39	13.21	11.64	12.13	11.01	10.77	14.88	12.45	9.07	11.33	13.49	10.19	14.86	14.1	14.2	11.17	9.45	8.92	12.18	10.99
AT1G12720	0	0	0	0	0	0	0	0.04	0	0	0	0	0	0.06	0	0	0	0	0	0
AT1G12725	0.31	0	0.32	0	0	0	0	0	0	0	0	0.32	0	0	0.28	0	0	0	0	0
AT1G12730	2.03	1.86	2.04	3.4	1.73	1.92	2.74	1.32	2.81	2.7	3.1	3.35	3.94	4.34	3.59	2.6	2.63	2.64	2.29	2.1
AT1G12740	14.19	14.41	11.83	21.62	8.62	10.57	13.15	17.02	12.36	11.87	16.06	14.85	17.67	12.07	17.51	13.81	3.3	4.19	4.78	4.99
AT1G12750	3.67	3.26	5.97	7.26	5.31	5.34	7.07	4.82	4.07	4.67	3.06	3.94	5.33	3.59	4.49	5.77	3.26	3.59	4.1	4.34
AT1G12760	38.29	41.17	44.39	40.92	46.3	39.14	48.52	42.88	38.53	34.18	38.47	32.15	38.63	35.47	37.11	38.42	49.32	39.96	40.75	40.63
AT1G12770	7.94	9.59	14.44	15.85	11.79	13.72	15.05	21.12	16.85	24.96	27.4	28.67	10.65	12.97	9.84	16.74	12.73	15.43	16.01	17.09
AT1G12775	1.41	0.83	1.53	2.04	1.61	1.54	1.45	1.44	1.95	1.98	2.45	2.43	2.23	1.65	1.41	1.52	0.88	1.93	2.02	1.98
AT1G12780	79.47	86.09	94.03	87.8	95.32	85.5	100.22	85.11	77.09	89.46	87.01	89.9	159.21	155.76	127.66	146.3	85.72	74.47	86.56	80.74
AT1G12790	4.46	4.19	6.79	7.42	5.85	7.76	10.52	7.83	5.29	7.65	7.53	6.57	14.81	16.1	12.17	12.81	3.1	4.3	5.62	5.14
AT1G12800	14.93	15.92	25.76	31.78	24.73	28.78	28.63	38.71	30.05	43.58	43.85	56.86	24.94	23.07	21.76	38.35	29.45	35.09	34.58	31.78
AT1G12805	4.82	5.95	7.28	10.24	0.5	0	1.3	5.5	5.28	11.86	10.09	15.19	19.69	12.14	21.62	17.9	0.68	0.96	1.79	0.78
AT1G12810	86.96	89.29	88.53	87.11	98.14	80.73	100.21	72.12	73.4	65	72.56	57.28	78.64	82.88	76.11	79.47	92.92	77.57	90.1	86.41
AT1G12820	21.72	20.93	24.79	26.12	26.75	23.76	31.24	26.18	28.23	26.29	30.08	30.85	26.8	26.83	25.17	26.79	24.88	24.46	27.95	28.98
AT1G12830	9.62	10.88	10.6	12.24	7.95	10.67	9.7	27.85	14.28	19.76	16.29	17.14	13.43	13.95	14.1	14.06	8	8.67	12.62	10.66
AT1G12840	241.65	249.75	191.38	252.96	220	201.46	193.78	204.58	224.1	232.99	252.67	230.78	257.68	229.63	212.2	198.22	202.05	177.14	230.25	204.35
AT1G12845	57.92	53.24	39.7	37.63	56.61	51.16	31.35	18.72	57.65	59.59	42.24	43.48	49.86	49.01	47.29	49.75	52.99	45.88	49.78	49.32
AT1G12850	33	33.18	30.81	37.67	34.09	29.49	29.42	34.98	40.91	38.63	35.08	37.21	34.57	29.7	27.53	28.24	31.22	27.89	31	33.4
AT1G12855	0	0	0	0.09	0	0	0	0	0	0.08	0	0	0	0	0	0	0	0	0	0
AT1G12860	7.3	11.11	14.64	10.92	11.31	8.13	11.47	7.82	15.38	20.27	15.29	18.25	17.17	21.81	15.61	21.19	19.51	18.07	15.07	17.89
AT1G12870	0	0	0	0	0	0	0	0	0	0	0	0	0	0	0	0	0	0	0	0
AT1G12880	3.96	8.98	6.18	6.75	8.12	4.59	3.56	5.27	12.42	10.96	5.64	7.02	7.73	7.15	8.25	6.6	7.56	5.9	8.1	7.55
AT1G12890	0	0.21	0	0.23	0	0	0	0	0	1.12	0	0.23	0.24	0.24	0.4	0	0.51	0.18	0.19	0.39
AT1G12900	33.57	43.56	44.64	39.54	55.95	52.5	48.16	36.86	35.67	47.67	27.45	24	13.13	17.8	19.02	24.76	129.15	92.91	89.84	91.56
AT1G12910	23.18	22.93	28.56	32.23	26.61	24.94	32.05	23.62	26.32	26.8	30.92	28.13	27.29	28.19	24.54	27.06	29.08	23.32	26.1	24.6
AT1G12920	64.78	65.41	79	92.59	65.62	63.32	73.99	87.52	78.67	92.29	103.27	106.59	95.71	104.19	80.78	88.22	61.15	60.84	72.93	69.63
AT1G12930	7.1	8.03	9.21	10.58	9.27	9.36	10.83	8.18	10.54	9.8	13.61	12.9	12.35	11.78	10.63	11.69	10.55	9.86	10.4	10.65
AT1G12935	0	0	0	0	0	0	0	0	0	0	0	0	0	0	0	0	0	0	0	0
AT1G12938	0	0	0	0	0	0	0	0	0	0	0	0	0	0	0	0	0	0	0	0
AT1G12940	0	0	0.37	0.23	0	0	0	0	0	0	0.08	0.07	0	0.16	0	0	0	0	0	0
AT1G12950	16.76	17.66	10.99	25.1	8.95	13.6	9.51	18.27	10.74	7.83	8.88	14.7	17.63	12.53	17.11	13.48	4.86	3.89	6.09	4.81
AT1G12960	0	0	0	0	0	0	0	0	0	0	0	0	0	0	0	0	0	0	0	0
AT1G12970	7.82	9.06	9.87	11.32	7.7	9.55	9.92	10.54	9.59	9.98	10.5	11.4	10.75	9.66	9.71	9.89	8.94	7.66	7.57	7.93
AT1G12980	0.11	0.1	0	0	0	0.07	0.15	0	0	0.09	0.12	0.43	0.35	0.12	0.1	0.26	0	0	0	0.09
AT1G12990	20.04	21.65	13.37	17.88	21.3	24.03	18.86	13.71	25.07	23.83	17.69	15.29	25.02	20.52	20.94	18.36	25.14	20.47	25.27	25.25
AT1G13000	15.99	18.88	21.69	23.53	23.84	23.13	23.88	23.47	26.91	24.6	22.52	22.05	27.77	23.82	23.88	22.7	22.25	21.49	23.17	23.42
AT1G13010	0	0	0	0	0	0	0	0	0	0	0	0	0	0	0	0	0	0	0	0
AT1G13020	17.72	20.82	18.08	19.75	20.97	23.74	19.11	30.5	29.59	30.66	27.71	28.43	25.83	25.6	24.46	29.88	23.76	22.43	24.96	23.78
AT1G13030	1.73	2.01	2.56	3.99	2.1	2.81	2.93	5.13	2.81	3.09	4.19	4.38	4.09	3.41	3.5	4.34	1.83	1.9	3.48	2.5
AT1G13040	0.59	1.26	0.76	1.47	0.69	1.3	2	1.65	1.87	1.96	3.55	2.03	2.55	2.56	1.81	2.64	1.61	1.34	1.92	1.38
AT1G13050	0.83	1.87	3.41	2.9	2.28	1.65	2.26	2	2.46	4.2	3.71	4.01	3.63	3.04	2.85	3.86	1.72	1.68	2.29	2.73
AT1G13060	122.08	129.84	156.47	170.98	130.16	134.11	121.3	158.59	158.03	163.32	195.29	199	159.78	154.79	145.96	152.79	130.19	130.98	152.08	143.14
AT1G13070	0	0	0	0	0	0	0	0.23	0	0	0	0	0.09	0	0	0.06	0	0.06	0	0
AT1G13080	48.98	53.31	26.72	36.43	28.52	33.34	22.21	22.27	43.09	48.61	23.63	27.21	121.9	95.82	101.87	97.9	66.85	63.45	72.85	81.25
AT1G13090	24.07	26.72	31.94	31.64	29.55	24.92	31.98	26.99	23.35	23.4	20.15	17.65	25.61	24.49	19.13	22.14	22.44	22.16	22.99	25.28
AT1G13100	17.52	18.45	20.55	16.03	17.27	12.39	17.39	13.51	13.37	13.44	12.91	11.06	7.78	6.13	5.61	7.62	17.4	12.26	14.63	15.37
AT1G13110	37.19	43.13	24.84	26.06	44.08	32.75	20.92	19.88	36.19	34.38	19.89	15.09	29.7	25.03	26.05	27.64	60.51	42.17	44.19	47.35
AT1G13120	6.03	7.66	9.94	10.98	9.27	8.58	10.64	11.28	10.75	10.6	13.63	14.1	11.48	10.33	10.52	11.83	7.93	8.08	8.63	8.36
AT1G13130	0.29	0.54	0.44	0.52	0.95	0.9	0.16	0	0.58	0.3	0	0.44	0.55	0.24	0.78	0.64	0.73	0.58	0.61	1.31
AT1G13140	0	0	0	0	0	0	0	0	0	0	0	0	0	0	0	0	0	0	0	0
AT1G13145	8.22	5.48	8.63	11.29	7.93	8.3	6.92	6	6.01	9.19	8.42	5.18	5.97	5.6	7.37	5.77	5.04	4.1	5.23	4.14
AT1G13150	0.07	0	0	0	0.12	0	0	0	0	0	0	0	0	0	0	0	0	0	0	0
AT1G13160	6.2	6.62	9.95	13.16	8.2	8.78	11.71	15.92	12.76	15.23	18.63	21.27	15.65	18.6	16.16	17.08	7.91	7.73	9.74	9.25
AT1G13170	17.37	19.05	22.47	28.04	18.28	20.88	24.42	30.54	25.68	25.83	30.19	30.09	23.79	19.8	20.41	22.98	16.87	18.22	20.71	21.69
AT1G13180	10.36	11.43	9.2	12.46	12.47	11.24	10.33	10.28	14.09	12.97	12.83	14.02	13.02	13.43	11.53	12.57	12.54	11.14	12.01	12.2
AT1G13190	15.02	15.7	14.25	17.76	18.85	18.21	17.25	21.09	19.86	23.13	22.69	21.32	22.32	23.74	18.21	24.55	15.8	13.62	17.82	17.79
AT1G13195	11.47	7.81	11.88	12.96	14.39	10.14	15.39	10.04	10.55	12.21	11.7	7.36	10.47	10.13	11.99	8.72	14.04	9	8.77	11.87
AT1G13200	0.1	0.29	0	0	0.17	0.13	0	0	0	0	0	0	0.11	0	0.09	0.16	0	0	0	0.09
AT1G13210	21.37	24.63	13.57	17.55	36.94	29.94	20.92	14.73	32.15	30.28	18.23	17.35	30.33	26.93	23.11	27.03	40.04	31.67	33.45	36.18
AT1G13220	4.51	5.69	4.28	6.84	6.06	5.34	5.44	10.12	6.81	8.66	7.87	7.69	7.62	8.12	6.29	9.73	5.7	6.56	8.43	8.76
AT1G13230	0.37	0.6	0.28	0.95	0.91	1.32	0.2	0.27	1.17	1.31	0.51	0.83	1.8	2.01	1.58	0.96	1.45	1.25	1.63	2.22
AT1G13240	0	0	0	0	0	0	0	0	0	0	0	0	0	0	0	0	0	0	0	0
AT1G13245	28.77	35.25	29.94	26.92	44.05	32.34	40.81	30.24	32.62	33.6	25.34	20.49	27.89	20.71	31.06	25.67	46.61	29.54	27.08	31.67
AT1G13250	19	18.88	46.14	53.68	24.17	22.25	41.81	44.2	31.5	32.55	59.67	65.01	13.66	16.88	14.78	16.51	17.38	17.33	19.35	16.04
AT1G13260	49.18	56.72	65.39	72.86	71.54	65.06	71.95	82.56	68.31	75.78	76.81	76.56	31.89	30.99	32.49	47.61	60.18	53.2	57.63	52.11
AT1G13270	16.22	20.06	31.34	32.37	14.08	23.42	21.23	34.52	35.43	47.89	62.21	73.7	14.99	18.98	16.8	25.65	22.49	27.02	31.08	28.61
AT1G13280	123.99	130.9	158.79	167.55	129.87	116.87	121.23	147.88	161.01	157.9	190.87	175.66	184.24	175.38	176.06	155.97	167.23	129.23	145.67	142.95
AT1G13290	0	0	0	0	0	0	0	0	0	0	0	0	0	0	0	0	0	0	0	0
AT1G13300	30.45	33.17	21.24	28.94	42.65	42.69	41.12	31.3	20.44	21.16	16.22	16.61	35.51	30.66	39.53	37.51	51.48	40.41	41.05	47.93
AT1G13310	0	0	0	0	0	0	0	0	0.07	0	0.1	0	0	0	0	0.08	0	0	0.08	0
AT1G13320	38.81	41.76	42.72	53.04	45.84	48.92	46.8	40.37	57.05	52.89	59.32	59.36	58.89	52.64	54.77	55.66	48.93	47.55	48.06	48.57
AT1G13330	1.07	2.14	3.64	3.58	1.33	1.5	1.55	3.12	0.85	1.45	1.05	2.02	2.04	1.46	1.81	2.37	1.36	2.03	2.83	1.5
AT1G13340	2.65	1.91	2.14	2.55	4.52	2.53	2.56	1.61	4.23	4.21	3.65	3.65	16.64	16.21	10.05	9.77	6.6	5.95	5.24	5.27
AT1G13350	8.77	12.93	13.66	16.07	15.67	13.13	20.78	15.62	16.33	17.77	17.25	17.68	19.46	17.29	14.03	19.49	15.04	14.22	12.69	13.67
AT1G13360	50.07	66.36	49.01	43.16	86.45	64.21	56.57	48.57	51.5	53.17	37.02	26.92	63.39	57.95	55.17	60.98	84.92	71.66	69.83	75.67
AT1G13370	0.23	0.86	0.23	0.47	1.89	1.14	0.5	0.33	0.73	0.96	0.77	0	0.25	0.25	0.21	0.92	0	0.92	0.58	0.59
AT1G13380	15.66	14.2	28.39	26.95	16.43	18.11	20.67	23.91	24.4	22.82	29.41	29.3	21.07	23.51	25.05	25.07	16.67	16.07	19.83	16.4
AT1G13390	22.3	23.83	24.95	29.83	25.29	22.98	34.33	29.19	22.08	25.96	26.44	24.18	24.59	24.48	22.67	26.52	19.89	14.36	18.67	18.83
AT1G13400	0.18	0.17	0.37	0	0.3	0	0.13	0.13	0.15	0.31	0	0.37	0	0.6	0.33	0.15	0	1.02	0	0.16
AT1G13410	0.28	0.47	0.78	1.17	0.35	0.4	0.41	0.77	0.74	1.01	1.03	0.57	1	0.93	0.45	1.14	0.24	0.62	0.48	0.18
AT1G13420	76.44	75.86	42.42	59.62	88.65	97.87	54.62	149.84	28.83	30.73	23.45	30.48	110.43	85.13	77.73	66.62	55.11	50.6	56.22	58.96
AT1G13430	2.24	2.6	3.86	4.72	0.88	0.66	1.33	1.17	0.34	0.18	0.36	0.11	0.82	0.7	0.48	0.77	0.24	0.26	0.18	0.28
AT1G13440	741.52	710.24	778.05	992.77	577.63	609.06	680.93	1021.65	949.71	1015.88	1172.91	1206.37	1156.11	1039.56	1052.08	994.48	580.86	559.82	694.59	640.75
AT1G13448	0.77	2.17	2.84	1.59	1.27	1.12	2.23	2.06	1.64	1.5	0.29	1.03	0.84	1.12	0.46	1.65	0.87	0.82	0.87	0.22
AT1G13450	15.38	22.42	25.13	23.94	19.61	18.33	23.76	22.89	21.19	21.83	21.77	21.48	22.2	21.42	20.14	18.92	19.83	15.93	16.98	15.59
AT1G13460	15.62	15.37	14.89	15.86	20.4	13.88	14.87	11.62	15.39	20.31	15.69	13.2	20.65	17.27	17.42	16.25	21.73	13.3	18.34	17.67
AT1G13470	0.1	0	0.42	0.32	0	0.13	0.23	0.08	0.33	0.35	0.23	0.21	0.11	0.23	0	0.17	0.24	0.5	0.62	0.63
AT1G13480	0.49	0.19	1.19	2.03	0.65	0.25	0.71	1	0.55	0.82	2.09	0.99	0.97	0.22	1.07	1.03	0.22	0.55	0.08	0.17
AT1G13485	0	0	0	0	0	0	0	0	0	0	0	0	0	0	0	0	0	0	0	0
AT1G13490	0.12	0	0	0	0	0	0	0	0.1	0	0	0	0	0	0	0	0	0	0	0
AT1G13500	0.92	0.87	1.16	1.07	0.38	0.43	0.75	1.18	1.01	0.39	0.77	1.51	0.75	0.63	1.35	1.02	0	0.18	0.69	0.4
AT1G13510	2.21	2.16	1.37	1.31	1.96	1.32	1.05	1.36	2.24	2.06	3.04	2.74	3.42	1.58	1.23	1.03	1.25	0.61	1.15	0.81
AT1G13520	0.63	1.67	0.84	1.29	1.38	0.85	0.76	0.76	1.75	2.54	1.64	2.85	1.03	0.69	0.47	0.59	1.78	1.43	2.13	1.27
AT1G13530	8.8	11.43	6.88	10.98	6.51	7	5.29	9.63	8.05	8.14	7.63	8.41	11.61	12.9	9.62	6.63	5.5	6.59	6.29	8.32
AT1G13540	0.53	1.2	0.21	0.76	0.7	0.66	0.85	0.7	0.51	0.89	2.13	1.5	1.15	1.04	0.96	0.85	0.6	0.42	0.81	0.73
AT1G13550	0.31	0.2	0.11	0.65	0.35	0.39	0.08	0	0.17	0.44	0.47	0.21	0.68	0.46	0.38	0.08	0.24	0.25	0.27	0
AT1G13560	36.88	38.59	42.77	53.21	40.27	42.3	41.29	42.16	56.47	53.19	64.99	58.12	51.14	51.38	48.89	49.33	43.37	39.99	47.52	40.51
AT1G13570	12.94	15.85	20.06	21.11	17.78	15.51	22.85	11.42	15.46	14.79	17.76	18.4	19.77	18.6	13.16	13.94	16.81	13.77	13.76	17.17
AT1G13580	16.45	14.43	14.74	22.37	21.55	14.35	13.83	12.13	21.76	20.99	23.01	21.92	28.68	24.22	24.52	17.48	14.24	13.21	17.63	17.3
AT1G13590	54.52	47.53	84.66	103.92	26.04	26.85	60.53	100.31	58.26	73.13	79.4	81.05	134.31	126.18	121.81	87.05	10.07	13.22	18.84	18.45
AT1G13600	2.79	1.41	0.22	0.66	2.48	2	2.17	2.35	2.05	2.34	2.64	1.52	1.64	4.92	2.9	2.59	0.97	1.2	1.27	1.67
AT1G13605	0	0	0	0	0	0	0	0	0	0	0	0	0	0	0	0	0	0	0	0
AT1G13607	0	0	0	0	0	0	0	0	0	0	0	0	0	0	0	0	0	0	0	0
AT1G13608	0	0	0	0	0	0	0	0	0	0	0	0	0	0	0	0	0	0	0	0
AT1G13609	0	0	0	0	0	0	0	0	0	0	0	0	0	0	0	0	0	0	0	0
AT1G13610	0.31	0.1	0.1	0.32	0.17	0.13	0.07	0.22	0	0.17	0.11	0	0	0	0.18	0	0.23	0	0.09	0
AT1G13620	1.19	0.22	0.24	0.25	0	0.3	0	0.35	0.76	1	0	0	0.78	0	0.64	0.38	0.27	0.38	0.81	0.62
AT1G13630	0.37	0.52	0.42	1	0.6	0.55	0.58	0.48	0.74	0.86	1.64	1.57	1.71	1.19	0.75	1.45	0.5	0.58	0.59	0.41
AT1G13635	3	2.69	4.39	6.45	5.85	5.48	8.26	7.25	4.46	5.44	4.56	2.47	6.6	7.28	6.51	5.67	8.32	6.98	7.36	8.22
AT1G13640	31.67	33.41	38.14	39.35	35.92	30.99	41.58	33.25	35.59	45.91	46.27	48.89	90.83	92.57	53.6	64.81	32.09	33.49	32.9	34.9
AT1G13650	0	0.21	0	0.12	0	0	0.08	0.08	0	0.1	0.13	0.11	0	0	0	0	0	0.09	0.1	0.1
AT1G13660	0.05	0	0	0.05	0	0	0	0	0	0	0	0	0	0	0	0.04	0	0	0	0
AT1G13670	4.89	3.77	6.33	5.04	5.77	7.5	5.56	14.13	4.87	5.11	6.43	6.69	6.08	4	6.92	5.34	6.32	6.84	8.14	6.33
AT1G13680	0	0	0	0	0	0.07	0	0.17	0.09	0	0	0	0.12	0.12	0	0.09	0	0.18	0	0
AT1G13690	20.96	18.78	23.42	26.16	20.83	18.96	19.45	27.23	17.77	25.77	21.39	27.91	23.37	23.59	22.43	27.05	18.34	20.18	23.33	20.1
AT1G13700	7.1	7.81	3.64	3.87	5.09	5.09	3.59	2.44	8.56	8.86	3.59	5.81	8.9	6.29	4.35	6.7	10.92	8.05	10.11	9.73
AT1G13710	1.41	1.45	1.06	1.88	1.39	1.8	1.58	1.79	1.63	2.53	2.35	2.77	1.68	2.61	1.84	3.01	0.95	1.58	1.67	1.89
AT1G13720	0	0	0	0	0	0	0	0	0	0	0	0	0	0	0	0	0	0	0	0
AT1G13730	12.12	14.39	14.98	20.94	11.63	18.18	13.75	30.63	25.38	30.42	30.38	34.48	28.77	29.89	27.54	27.54	14.28	13.67	18.09	16.33
AT1G13740	9.22	8.89	6.66	6.64	12.13	9.86	7.1	11.89	7.82	9.49	6.38	6.91	20.35	18.71	13.05	16.99	9.23	9.02	11.07	8.9
AT1G13750	5.39	6.03	7.08	9.32	11.3	8.22	12.24	10.51	8.78	8.84	10.51	8.38	11.78	9.55	11.54	11.11	6.7	5.97	6.22	6.14
AT1G13755	0	0	0	0	0	0	0	0	0	0	0	0	0	0	0	0	0	0	0	0
AT1G13760	0	0	0	0	0	0	0	0	0	0	0	0	0	0	0	0	0	0	0	0
AT1G13770	6.85	9.22	8.82	9.84	9.35	9.21	10.52	8.22	11.45	10.15	10.37	11.93	14.4	13.23	12.26	10.22	9.8	9.06	8.86	9.64
AT1G13780	4.06	3.44	5.37	4.84	4.6	4.71	6.29	4.06	4.25	6.12	7.64	5.94	5.89	5.91	4.74	5.01	5.49	4.78	3.78	5.71
AT1G13790	0.63	0.64	1.06	1.03	0.69	0.72	0.88	1.57	1	1.23	1.7	2.01	0.63	0.86	0.43	1.06	0.77	1.09	0.93	1.22
AT1G13800	0.05	0.18	0.24	0.39	0.31	0.35	0.38	0.59	0.3	0.4	0.79	0.91	0.62	0.47	0.56	0.23	0.32	0.23	0.08	0.37
AT1G13810	1.24	2.22	3.17	5.21	1.49	1.82	3.67	3.94	3.41	3.39	6.91	6.24	4.65	5.53	4.77	5.44	2.16	1.89	3.24	2.82
AT1G13820	6.39	5.23	7.37	5.84	7.49	10.08	9.94	11.49	2.88	5.17	6.44	5.41	4.6	4.28	3.63	6.07	10.37	10.81	9.87	8.65
AT1G13830	39.62	38.84	28.49	31.41	39.44	30.88	32.62	30.5	24.46	25.51	21.93	19.64	42.79	31.04	29.44	26.19	37.74	23.99	31	30.29
AT1G13840	0	0	0	0	0	0	0	0	0	0	0	0	0	0	0	0	0	0	0	0
AT1G13850	0	0	0	0	0	0	0	0	0	0	0	0	0	0	0	0	0	0	0	0
AT1G13860	8.68	9.14	8.33	12.8	9.75	10.48	9.55	11.02	18.3	17.53	14.3	14.1	16.37	15.4	14.3	14.46	10.47	9.25	10.61	10.88
AT1G13870	10.76	16.93	16.96	20.73	16.04	14.93	14.42	18.59	17.27	19.09	19.07	21.36	21.78	19.79	17.73	17.93	15.35	12.74	14.88	17.3
AT1G13880	20.14	24.11	23.63	26.21	29.01	22.59	26.75	23.45	22.49	21.15	21.64	21.61	24.15	21.91	21.28	21.33	25.86	22.56	22.4	23.12
AT1G13890	0	0	0	0	0	0	0	0	0	0	0	0	0	0	0	0	0	0	0	0
AT1G13900	17.56	20.34	11.98	15.76	24.69	23.42	15.52	15.7	24.38	27.34	14.67	12.72	24.51	22.88	21.13	21.31	26.9	21.9	26.16	27.54
AT1G13910	2.07	2.5	4.06	4.26	3.74	3.31	4.78	3.3	2.75	2.22	4.28	3.08	2.46	1.4	3.02	2.7	4.12	2.92	3.34	2.55
AT1G13920	2.75	3.2	5.15	4.32	7.15	5.39	7.6	6.02	6.07	4.61	4.83	4.23	3.57	3.15	2.36	4.12	8.16	6.3	8.34	9.29
AT1G13930	28.28	27.4	84.81	81.94	42.48	37.19	73.16	110.42	35.38	55.97	78.94	81.9	29.57	31.78	48.9	63.45	33.9	24.68	29.25	31.65
AT1G13940	5.04	6.36	6.15	8.12	7.29	6.58	9.01	9.52	6.79	7.17	8.83	8.66	7.61	6.64	7.11	8.39	7.45	6.84	7.11	7.81
AT1G13950	33.99	30.84	32.64	35.83	18.93	22.38	21.17	24.21	14.66	10.26	16.55	19.13	16.79	15.73	17.25	15.11	22.58	17.86	21.86	22.02
AT1G13960	24.64	29.09	30.25	34.95	31.57	28.75	37.77	41.88	25.05	26.85	31.91	27.96	32.41	27.66	28.64	29.3	27.65	20.91	21.34	24.38
AT1G13970	10.5	12.02	4.38	7.88	13.44	11.96	7.22	7.92	9.92	10.34	5.62	3.32	20.63	17.71	18.9	16.11	12.3	10.36	11.38	11.51
AT1G13980	9.55	11.06	9.23	13.87	14.11	11.79	14.5	10.82	12.91	13.01	13.34	13.17	12.8	11.86	10.49	12.76	13.07	12.2	13.32	13.21
AT1G13990	17.74	21.71	16.87	23.86	20.57	16.58	22.57	21.12	17.58	17.67	14.36	16.93	29.75	24.54	20.88	22.16	19.3	19.73	19.4	20.84
AT1G14000	47	49.37	54.56	55.27	56.33	52.25	55.6	56.04	56.96	58.37	59.85	54.58	53.88	44.64	45.55	49.01	60.39	48.54	56.74	56.56
AT1G14010	67.43	82.32	77.22	77.28	84.58	84.33	61.8	103.3	78	80.27	63.78	64.65	88.29	87.77	72.69	79.73	80.22	70.83	94.98	85.4
AT1G14020	14.1	14.28	12.77	17.27	15.49	17.16	14.46	17.82	19.37	20.4	17.48	16.84	20.07	17.31	17.54	18.75	17.92	15.29	17.93	15.23
AT1G14030	4.75	4.25	12.36	9	6.1	9.34	9.67	8.07	8.06	10.52	11.6	18.16	6.4	6.99	6.46	9	7.07	10.2	9.2	8.28
AT1G14040	13.58	13.04	20.84	21.97	20.37	17.17	25.26	19.78	17.73	16.1	22.25	17.29	14.65	12.86	13.76	14.84	15.12	14.39	17.42	16.35
AT1G14048	0	0	0	0	0	0	0	0	0	0	0	0	0	0	0	0	0	0	0	0
AT1G14060	9.39	9.43	13.79	18.37	6.05	7.63	6.57	20.43	16.9	19.19	21.51	23.92	15.26	15.11	13.61	16.76	7.74	5.35	6.46	5.64
AT1G14070	11.41	12	7.2	9.39	17.58	11.88	13.9	9.56	9.25	8.69	7.41	4.64	14	12.09	11	9.42	13	12.21	10.39	14
AT1G14071	0	0	0	0	0	0	0	0	0	0	0	0	0	0	0	0	0	0	0	0
AT1G14080	6.26	6.74	5.01	5.79	6.57	6.69	5.16	4.35	7.38	7.31	6.27	5.74	9.83	9.32	8.54	7.52	9.64	7.91	9.94	11.01
AT1G14090	1.37	1.01	1.38	1.92	1.37	1.11	1.78	1.82	1.73	1.84	1.72	2.43	2.53	2.45	1.73	2.55	0.89	1.17	1.16	0.86
AT1G14100	0	0	0	0	0	0	0	0	0	0	0	0	0	0	0	0	0	0	0	0
AT1G14110	0	0	0	0	0	0	0	0	0	0	0	0	0	0	0	0	0	0	0	0
AT1G14120	44.72	53.95	26.7	31.38	66.07	56.47	26.23	40.3	74.09	76.81	51.05	44.54	61.67	59.37	74.32	70.6	99.13	75.58	83.44	91.83
AT1G14130	10.7	11.73	11.12	10.15	11.47	10.7	9.26	11.56	8.39	8.95	9.22	8.42	11.34	7.47	10.42	10.22	13.8	10.07	10.92	12.5
AT1G14140	8.61	10.17	10.2	13.07	7.88	9.57	10.04	13.24	10.13	13.64	15.98	14.68	9.89	9.79	8.4	9.76	8.82	9.23	10.07	9.76
AT1G14150	2.49	3.38	7	4.64	4.62	5.33	4.77	3.38	3.43	3.15	3.01	3.83	0.44	0	0.91	1.29	12.9	10.72	9.53	10.28
AT1G14160	24.88	25.93	27.18	22.99	37.6	25.25	30.69	17.48	20.09	21.32	15.65	17.33	16.26	18.1	21.06	20.17	41.84	25.46	29.78	31.8
AT1G14170	46.11	46.86	44.79	51.69	54.87	47.5	52.08	42.39	41.17	41.46	41.15	39.3	59.8	51.82	53.61	47.41	42	37.56	45.68	42.71
AT1G14180	2.9	2.65	5.04	4.82	2.53	3.21	2.86	3.87	3.92	6	5.3	4.95	3.16	4.92	2.91	4.16	2.91	3.29	4.71	5.02
AT1G14182	2.23	5.6	1.5	4.59	3.69	3.68	3.19	4.35	2.95	2.5	0.83	0.75	1.62	0	0.67	3.54	5.9	2.95	3.78	5.1
AT1G14185	2.98	5.1	3.6	4.52	3.56	4.17	3.18	3.8	2.26	2.86	2.41	1.65	1.38	2.27	2.22	2.04	4.8	4.23	2.96	4.7
AT1G14190	1.21	1.3	2.18	2.5	3.58	2.81	2.33	2.08	2.35	3.26	2.03	2.01	2.92	2.18	2.66	2.31	3.23	3.33	2.35	3.07
AT1G14200	13.67	18.38	16.55	17.11	19.44	14.86	19.79	14.89	11.46	13.47	9.85	10.12	12.06	15.1	12.47	11.85	20.95	18	18.04	19.59
AT1G14205	1.6	1.25	3.49	1.92	1.76	0.99	1.92	2.33	2.34	2.9	2.38	2.95	2.32	2.9	2.87	2.14	3.62	2.34	2.48	1.84
AT1G14210	38.13	33.35	57.61	57.97	34.33	37.94	56.14	63.13	27.69	35.18	39.08	32.01	32	31.38	36.9	35.13	39.07	34.52	41.47	35.93
AT1G14220	6.39	6.01	4.72	2.2	5.28	14.72	3.85	6.37	4.93	4.64	3.81	2.15	10.91	7.44	6.52	3.09	11.58	9.89	8.85	11.97
AT1G14225	0	0	0	0	0	0	0	0	0	0	0	0	0	0	0	0	0	0	0	0
AT1G14230	32.39	36.31	33.1	39.75	40.52	36.41	38.12	36.77	41.4	41.68	40.03	36.6	45.63	39.94	36.46	38.45	40.62	30.96	36.59	34.7
AT1G14240	55.27	69.52	34.29	45.49	70.74	72.04	64.68	46.99	72.84	66.26	38.12	40.82	121.59	106.44	115.36	127.75	118.44	97.24	100.57	110
AT1G14250	0	0	0	0	0	0	0	0	0	0	0	0	0	0	0	0	0	0	0	0
AT1G14260	0.66	0.36	0.96	1.26	0.95	1	0.55	0.28	1.22	1.02	1.15	1.8	1.04	0.51	0.51	0.39	0.85	1.28	0.96	0.81
AT1G14270	9.39	10.5	20.64	19.11	15.45	16.67	18.14	21.18	17.16	21.1	24.04	31.26	11.47	15.01	11.87	15.86	18.15	16.2	19.32	17.88
AT1G14280	25.5	27.42	27.23	27.07	34.48	24.68	29.55	29.81	22.27	22.05	23.88	20.46	14.16	13.36	15.84	13.54	20.9	15.08	18.06	19.17
AT1G14290	59.07	56.29	33.67	40.34	68.11	63.16	32.82	21.12	76.32	77.07	46.26	38.16	93.37	82.18	68.01	58.13	76.6	59.19	74.67	75.3
AT1G14300	4.03	5.23	6.41	9.45	5.1	5.83	5.4	8.37	9.64	6.89	12.65	11.24	12.95	11.27	9.38	9.44	4.02	4.35	7.14	4.54
AT1G14310	8.44	7.93	8.18	7.89	8.78	10.41	9.17	9.91	8.11	10.2	7.68	8.35	11.91	11.26	9.44	9.19	9.55	9.38	8.74	9.46
AT1G14315	0	0	0.15	0	0	0	0	0	0	0	0	0	0	0	0	0	0	0	0	0
AT1G14320	576.07	613.61	800.49	915.42	502.51	578.35	553.62	923.12	878.74	951.54	1129.66	1221.99	840.37	874.08	800.14	832.83	528.34	542.59	715.67	570.51
AT1G14330	12.92	13.2	9.11	9.88	14.16	12.43	8.89	9.59	16.66	16.08	12.16	8.59	15.56	13.72	12.86	12.55	16.29	13.69	15.7	14.22
AT1G14340	23.18	19.57	27.03	28.87	23.14	21.61	27.99	23.01	22.37	18.52	19	21.13	24.8	25.01	20.43	23.12	29.03	19.71	24.09	23.55
AT1G14345	4.72	4.91	13.76	6.25	11.14	8.82	12.58	9.1	7.54	8.61	9.98	10.71	3.67	3.13	3.8	3.94	14.52	17.54	11.29	13.26
AT1G14350	13.75	18.12	16.5	23.59	20.93	17.39	16.61	24.26	28.34	32.67	25.3	24.95	25.45	21.34	23.31	23.93	28.73	24.66	27.66	30.99
AT1G14360	11.84	13.17	13.93	16.69	12.36	15.4	9.89	15.12	18.61	18.31	17.34	18.92	18.26	17.38	17.96	16.97	13.5	13.81	16.22	15.73
AT1G14370	17.75	20.21	19.73	20.19	22.59	16.03	22.1	14.33	15.83	16.88	16.92	17.52	15.7	14.37	15.96	15.82	18.31	15.99	18.43	18.81
AT1G14380	23.47	25.9	25.7	28.18	30.77	27.22	29.65	31.74	31.19	34.02	31.16	26.42	26.71	25.37	20.92	24.74	31.59	27.98	31.02	32.28
AT1G14390	5.53	5.46	3.3	5.18	7.36	9.67	6.8	5.92	7.89	8.31	4.41	3.36	12.17	10.48	9.23	9.25	7.53	8.46	8.08	7.82
AT1G14400	248.54	263.48	284.75	272.33	282.42	248.91	266.81	222.1	245.44	241.93	241.03	233.36	243.24	224.38	226.15	214	302.63	240.5	270.78	255.69
AT1G14410	11.6	10	16.92	21.8	11.75	13.17	14.37	21.24	22.96	32.16	35.22	41.57	23.56	24.02	20.5	23.98	15.04	14.81	19.75	18.4
AT1G14420	0	0.07	0	0	0	0	0	0	0	0	0	0	0	0	0	0	0	0	0.12	0
AT1G14430	1.35	2.06	1.62	1.46	1.38	1.65	1.26	1.46	2.93	2.53	1.73	3.12	1.89	2.18	1.92	3.02	2.48	2.32	1.53	2.23
AT1G14440	9.15	14.98	13.41	17.01	15.07	12.01	14.58	21.53	21	31.42	28.62	34.82	17.21	20.17	18.47	20.82	13.51	15.56	16.15	14.07
AT1G14450	181.8	175.44	151.57	165.04	107.19	125.78	106.34	189.66	167.36	169.93	158.97	138.26	136.02	150.99	133.44	121.98	117.49	99.57	126.65	98.13
AT1G14455	0	0	0	0	0.43	0.33	0	0.19	0.21	0.88	0.59	0.26	0.29	0	0	0	0.3	0	0.22	0
AT1G14460	6.41	7.05	4.79	7.36	7.64	8.63	7.06	9.08	9.08	10.87	8.78	7.64	9	7.3	7.03	7.77	8.56	9.06	10.26	9.67
AT1G14470	0.48	0.45	0.08	0.66	0.4	0.6	0.35	0.17	0.51	0.73	1.07	0.64	0.52	0.7	0.65	0.77	0.63	0.7	0.54	0.21
AT1G14480	1.67	1.22	1.94	1.32	1.32	2.03	2.11	1.2	2.84	3.5	2.05	1.01	2.4	1.82	1.18	1.96	3.5	2.77	2.91	3.91
AT1G14490	0.87	0.16	1.58	1.8	0	0.76	0.76	1.02	1.81	1.46	2.33	2.99	2.28	2.66	0.63	1.82	0.79	0.56	0.44	0.6
AT1G14500	0.2	0.95	0.1	0.21	0.67	0.38	0.07	0.29	0.08	0.34	0.34	0.31	0.22	0.44	0.64	0.24	0.34	0.08	0.43	0.17
AT1G14510	37.01	42.69	47.77	48.78	44.56	39.23	46.84	53.29	39.23	49.09	50.38	56.24	62.14	57.82	46.17	51.73	46.62	37.03	46.42	44.66
AT1G14518	0	0	0	0	0	0	0	0	0	0	0	0.25	0.82	0	0.22	0	0	0	0.21	0
AT1G14520	17.47	20	8.16	10.76	1.27	0.41	0.55	1.27	17.42	22.91	14.79	15.2	9.05	6.68	4.35	4.51	9.59	9.56	15.45	11.04
AT1G14530	9.16	11.55	12.13	12.73	10.32	11.48	12.46	8.35	12.1	13.73	13.49	12.08	26.07	23.6	18.14	15.96	11.42	10.94	11.97	12.79
AT1G14540	7.11	6.17	5.51	5.86	14.27	4.09	4.12	4.54	7.86	8.97	8.43	6.84	17.63	15.64	15.79	12.79	9.4	8.85	7.7	8.32
AT1G14549	0	0	0	0	0	0	0	0	0	0	0	0	0	0	0	0	0	0	0	0
AT1G14550	0.71	0.4	0.14	0.59	3.76	0.18	0.1	0.21	0.68	0.83	0.64	0.43	3.41	2.49	1.92	1.26	0.48	0.23	0.12	1.35
AT1G14560	10.76	13.48	17.14	18.24	17.88	16.78	21.23	19.22	19.88	18.41	18.37	17.95	23.58	21.51	22.05	18.45	14.95	15.55	13.65	15.09
AT1G14570	64.3	71.45	74.19	77.8	82.56	76.71	86.75	77.58	86.33	78.76	85.1	85.13	88.34	85.02	75.34	83.91	82.71	81.62	86.64	85.2
AT1G14580	12.67	16.85	11.65	10.09	21.28	17.86	15.14	12.61	16.25	15.21	11.04	10.59	13.1	14.3	11.44	15.74	23.77	18.51	19.85	19.77
AT1G14590	10.94	11.59	17.13	16.71	11.5	9.29	15.29	15.88	11.51	10.48	14.32	13.64	9.96	10.21	9.43	10.27	10.57	8.28	10.37	9.64
AT1G14600	4.4	3.58	6.94	8	4.84	3.92	5.31	5.66	4.44	5.76	9.32	10.2	7.34	4.16	4.02	3.66	5.14	4.69	5.47	3.67
AT1G14610	23.09	29.05	30.04	41.15	35.81	35.82	41.41	41.89	42.89	46.79	51.95	56.69	47.25	45.39	34.32	46.45	42.14	38.12	40.87	43.89
AT1G14620	16.83	14.91	31.82	31.01	8.36	17.71	17.45	30.32	21.07	27.81	41.99	52.15	31.88	35.53	25.9	29.88	11.91	15.77	19.02	18.09
AT1G14630	0.17	0	0.18	0.54	0.29	0.32	0.13	0.63	0.28	0.44	0	0.53	0.38	0.19	0.16	0.7	0.79	0.7	0.3	0
AT1G14640	0.57	0.86	0.52	0.89	1.14	0.93	1.25	0.96	1.65	1.3	1.92	1.39	4.13	4.64	2.8	4.31	1.82	1.75	1.9	1.64
AT1G14642	0	0	0	0	0	0	0	0	0	19.16	0	0	0	0	0	0	0	0	0	0
AT1G14650	13.46	16.82	19.39	26.74	21.6	18.59	26.06	27.17	28.67	32	35.62	36.05	28.45	31.45	25.15	29.86	19.63	19.47	21.27	23.03
AT1G14660	1.28	1.25	2.62	2.21	1.68	2	2.7	1.97	1.63	2.65	3.48	2.58	2.84	2.8	1.85	2.72	2.14	2.01	2.29	2.61
AT1G14670	125.01	138.3	148.89	202.04	132.94	141.75	139.55	150.59	223.73	197.32	229.19	217.44	168.65	175.54	158.1	161.48	128.35	129.52	147.99	140.09
AT1G14680	1.12	0.45	1.77	1.15	0.26	0.4	0.7	0.7	1.79	2.14	1.61	1.13	0.52	0.17	0.14	0.26	0.91	1.02	1.63	1.38
AT1G14685	25.16	33.85	36.42	41.43	34.64	30.7	35.99	35.13	35.17	39.91	39.95	39.73	38.36	33.34	34.77	35.14	42.52	34.22	36.46	36.67
AT1G14686	0.13	0	0.13	0	0.22	0.5	0.19	0.1	0.21	0.11	0.3	0.27	0.44	0	0.24	0.11	0.15	0.32	0.34	0.46
AT1G14687	0.87	0.49	1.76	1.62	0.58	1.09	0.63	1.66	0.84	1.17	1.76	1.76	0.38	0.38	0.79	0.14	1.38	1.12	1.04	1.36
AT1G14688	0	0	0	0	0	0	0	0	0	0	0	0	0	0	0	0	0	0	0	0
AT1G14690	13.15	15.06	13.92	15.12	17.34	14.75	15.24	15.26	18.28	22.85	17.33	15.62	24.27	19	16.57	18.03	21.51	16.17	19.78	21.67
AT1G14700	53.87	62.73	17.37	15.58	88.27	72.16	20.53	23.12	49.8	57.37	13.67	13.53	50.2	43.82	56.74	56.16	101.15	85.1	81.05	88.68
AT1G14710	25.54	29.63	34.72	43.57	31.8	32.7	35.18	40.18	50.6	49.22	56.82	57.89	46.31	43.62	41.84	48.44	33.05	34.04	36.77	36.08
AT1G14720	18.2	16.27	26.6	21.67	25.37	21.57	25.05	19.4	25.54	28.97	24.25	24.77	23.22	20.19	20.23	19.17	33.97	25.24	25.29	30.3
AT1G14730	27.66	30.37	24.91	29.32	62.82	59.37	60.32	43.82	42.03	36.5	26.76	19.98	44.9	40.93	52.65	60.15	63.33	57.6	65.62	66.11
AT1G14740	39.17	47.82	47.81	53.04	52.46	43.05	58.21	45.28	43.47	50.96	50.69	47.33	75.34	62.93	47.2	52.29	45.93	42.65	43.6	43.14
AT1G14750	1.57	1.99	2.78	4.55	2.5	2.89	1.89	3	6.02	5.47	5.27	6.95	7.01	4.68	4.3	6.16	1.16	1.6	2.98	2.25
AT1G14755	0.32	0	0	0.33	0	0	0	0.23	0.5	0	0.71	0.32	0.34	0	0.28	0	0	0	0	0
AT1G14760	0.76	1.2	2.41	1.77	0.84	0.48	1.29	1.98	1.83	1.28	0.85	1.98	4.53	4.73	4.81	4.51	1.73	1.63	1.08	1.54
AT1G14770	4.36	4.69	4.56	4.94	2.03	3.11	5.02	7.17	2.15	2.44	2.85	2.32	2.09	2.27	2.68	2.11	3.82	4.37	5.23	4.39
AT1G14780	6.83	8.75	8.27	9.83	8.21	6.92	9.49	9.1	7.48	8.03	8.39	8.46	8.82	6.19	7.47	7.85	6.87	5.61	6.72	5.66
AT1G14790	1.17	1.22	1.73	1.57	2.09	1.48	3.61	1.4	1.17	0.81	0.98	0.75	0.49	0.67	0.82	0.58	1.8	1.35	1.24	1.63
AT1G14800	0	0	0.35	0.12	0	0.22	0.17	0	0	0.19	0	0	0	0	0	0.09	0	0	0	0
AT1G14810	23.03	21.29	39.74	41.68	25.65	33.91	30.72	42.25	44.19	48.5	63.4	69.16	37.17	38.16	35.87	47.99	32.58	36.31	39.73	37.96
AT1G14820	14.54	16.9	14.87	13.7	14.86	14.02	15.31	15.49	14.24	14.38	14.64	12.36	13.63	12.24	11.52	12.72	14.92	12.74	18.85	14.46
AT1G14830	75.32	85.57	77.73	101.9	98.15	94.21	83.78	95.8	126.51	123.43	125.31	115.15	109.42	102.41	99.9	104.66	92.11	88.77	101.66	102.43
AT1G14840	8.34	8.2	10	13.04	9.34	11.17	11.69	14.58	12.88	14.8	14.97	16.05	7.09	11.18	10.33	12.29	10.75	10.23	10.4	11.02
AT1G14850	5.83	7.72	9.37	11.65	9.36	8.8	12.23	10.79	12.39	14.08	16.06	18.78	15.12	16.05	11.62	16.15	9.77	9.19	9.45	8.89
AT1G14860	39.02	41.93	58.16	52.37	43.95	36.11	64.52	44.18	44.85	43.53	44.62	37.43	53.53	46.11	43.49	41.18	31.84	29.42	36.41	36.73
AT1G14870	124.03	107.46	83.35	116.56	140.57	114.75	104.14	92.45	62.61	67.81	70	75.61	124.08	101.1	130.77	106.75	48.69	44.39	41.43	50.81
AT1G14880	0	0	0.19	0	0	0.12	0	0	0	0	0.21	0	0	0	0	0	0	0	0	0
AT1G14890	8.18	9.2	23.41	22.14	10.14	11.28	20.75	18.01	14.23	10.89	24.31	19.61	5.57	3.51	6.06	7.3	16.86	11.58	10.8	12.26
AT1G14900	55.06	54.87	77.28	85.11	54.47	61.93	72.18	76.3	76.21	88.36	91.87	106.76	69.52	71.7	69.09	75.8	68.29	64.3	74.17	65.65
AT1G14910	18.45	21.95	27.37	33.07	26.76	25.76	32.71	26.59	33.89	32.53	39.79	33.22	24.81	26.67	21.78	23.86	24.2	23.58	25.75	26.2
AT1G14920	32.77	32.46	28.49	32.04	34	30.34	30.89	25.1	37.25	35.64	36.37	35.58	33.92	33.12	30.95	32.82	31.72	28.17	31.98	31.87
AT1G14930	136.08	132.12	125.9	114.25	11.99	23.59	18.24	89.11	87.5	128.44	136.19	145.79	1042.77	864.42	729.93	610	20.08	26.93	33.5	30.48
AT1G14940	9.85	10.15	12.6	10.74	0.68	0.71	0.75	4.7	13.15	23.16	22.42	28.47	136.69	116.57	87.69	67.32	0.64	1.06	0.53	1.64
AT1G14950	71.5	78.78	82.39	96.46	0.55	0.83	1.81	6.18	77.22	169.89	125.86	133.83	559.45	485.69	404.49	247.98	4.33	4.52	3.24	6.47
AT1G14960	170.18	225.43	122.57	97.97	263.94	172.47	139.43	180	102.5	91.54	50.59	47.41	121.2	119.5	136.33	106.65	456.71	310.33	327.35	324.51
AT1G14970	2.11	1.85	2.76	3.12	2.67	3.81	2.66	3.74	4.72	6.06	4.4	4.33	5.98	5.84	5.34	6.53	2.07	3.1	4	3.41
AT1G14980	98.78	99.86	112.95	153.32	64.09	82.96	70.24	216.79	145.83	168.24	180.56	216.35	162.11	169.92	169.12	157.96	68.85	74.26	105.49	82.21
AT1G14990	11.47	14.39	23.6	18.61	12.39	15.82	18.82	19.63	14.43	13.3	17.98	18.35	13.68	18.52	15.28	16.05	16.48	13.66	18.79	16.76
AT1G15000	5.87	7.52	7.61	9.53	7.63	8.58	8.64	12.11	10.72	10.56	9.72	9.68	7.16	7.67	8.19	9.9	9.05	7.33	8.89	9.23
AT1G15002	2.91	1.52	2.6	1	0	1.81	0.23	0.47	1.29	0.27	1.08	1.3	0.7	0.7	2.32	1.3	0	2.32	0.55	0.56
AT1G15010	2.04	3.84	2.64	3	5.78	2.9	2.74	3.62	4.88	3.42	0.98	3.82	5.08	4.77	4.45	2.81	2.97	2.8	3.21	2.77
AT1G15015	0	0	0	0	0	0	0	0	0	0	0	0	0	0	0	0	0	0	0	0
AT1G15020	20.87	21.14	27.45	27.42	23.79	21.42	28.71	22.92	25.74	24.49	28.6	24.54	24.32	23.91	23.49	24.61	23.61	18.6	22.63	21.38
AT1G15030	14.17	15.68	19.73	18.98	17.42	15.88	16.22	16.29	16.72	19.88	16.78	19.37	17.74	15.39	12.87	14.23	21.54	17.47	20.48	19.68
AT1G15040	23.13	28.37	83.65	52.88	32.22	17.5	81.5	34.97	30.46	29.45	41.23	22.93	8.5	8.19	7.76	9.89	21.12	15.77	17.06	17.35
AT1G15045	0	0	0	0	0	0	0	0	0	0	0	0	0	0	0	0	0	0	0	0
AT1G15050	2.49	4.43	1.39	3.71	4.12	5.85	3.8	5.25	6.62	4.64	1.24	2.51	1.81	2.11	2.73	3.11	3.76	0.88	4.93	3.11
AT1G15060	8.91	11.36	12.79	14.73	16.34	12.47	17.4	10.49	12.86	13.24	16.14	17.19	11.85	11.66	11.53	13.05	14.36	13.52	12.86	14.7
AT1G15080	0.31	0.59	0.31	0.96	1.03	1.1	1.28	1.74	1.74	1.39	2.44	2.62	0.91	1.7	1.03	1.59	1.77	1.75	1.68	2.16
AT1G15090	0	0	0	0	0	0	0	0	0	0	0	0	0	0	0	0	0	0	0	0
AT1G15100	61.06	70.33	33.61	54.03	55.13	64.02	51.37	49.08	61.16	55.87	36.24	41.61	83.89	85.62	85.87	75.16	76.77	74.82	94.66	79.7
AT1G15110	23.86	26.65	19.97	22.25	33.71	29.8	22.07	20.26	30.6	28.51	19.77	20.64	33.58	30.06	27.16	25.41	34.4	28.16	31.17	31.34
AT1G15120	433.45	390.58	449.81	492.23	340.58	357.6	319.39	292.76	421.25	394.67	385.3	420.86	424.16	423.65	414.54	351.57	380.39	331.68	367.65	368.15
AT1G15125	0.13	0.12	0.39	0.13	0.85	0.48	0.19	0.66	0.21	0	0	0.13	0.56	0.56	1.04	0.62	0.44	0	0.22	0.22
AT1G15130	40.78	47.42	45.66	50.88	61.12	51.28	61.02	44.09	58.55	51.57	58.43	53.88	50.29	47.07	45.3	52.86	59.54	50.55	56.07	56.71
AT1G15140	17.02	19.93	26.28	25.04	20.74	22.83	24.74	23.84	30.63	32.41	35.04	42.6	15.79	19.58	19.77	25.6	26.87	22.73	25.65	22.5
AT1G15150	0	0	0	0.08	0.13	0	0.06	0	0	0	0.09	0.08	0	0	0	0	0.09	0	0	0
AT1G15160	0	0.17	0	0.09	0	0.06	0	0.07	0	0.07	0	0	0	0.2	0	0.36	0	0.14	0	0
AT1G15165	0.53	0.99	0.93	1.22	1.3	1.64	1.43	1.72	1.68	1.21	2.05	0.66	1.57	1.43	1.42	1.17	0.59	0.63	0.33	0.68
AT1G15170	4.95	5.84	14.01	13.24	4.36	6	13.71	9.87	4.8	4.81	12.07	9.19	9.85	8.09	9.85	9.21	4.23	3.96	4.67	3.83
AT1G15175	3.06	3.04	1.03	1.05	5.34	2.43	2.34	1.24	2.44	3.13	0.95	1.03	3.15	3.34	2.91	3.56	2.89	2.45	3.6	3.53
AT1G15180	9.35	11.02	11.63	9.38	9.32	8.89	9.59	4.21	7.59	7.55	5.77	7.7	28.3	26.42	17.22	18.34	11.4	9.38	9.88	9.94
AT1G15190	0.12	0.11	0.12	0.6	0.39	0.65	0.25	0.17	0.09	0.29	0.65	0.35	0.13	0.38	0.42	0.28	0.26	0.28	0.69	0.2
AT1G15200	25.84	34.75	36.57	50.7	29.21	34.81	38.43	61.77	42.3	52.83	50.51	54.58	55.77	59.15	45.4	64.8	33.93	38.51	37.79	40.4
AT1G15210	48.41	51.11	21.77	29.58	59.17	59.35	23.63	23.02	72.89	70.78	45.83	45.72	78.97	70.87	51.29	63.58	52.56	48.62	58.25	57.7
AT1G15215	3.97	5.48	8.63	8.7	3.9	3.94	6.14	7.88	6.14	8.31	7.24	10.52	7.19	6.1	6.08	7.51	5.39	4.97	7.16	6.44
AT1G15220	6.13	9.11	7.83	8.36	6.66	5.97	9.28	6.72	5.79	6.52	7.58	6.85	4.72	6.19	5.73	5.47	8.55	6.06	7.63	7.51
AT1G15230	21.42	25.11	33.3	31.61	25.78	25.36	30.96	31.24	23.96	28.22	26.87	35.35	47.38	44.89	37.96	40.09	16.75	19.9	20.18	20.01
AT1G15240	10.32	13.08	14.65	17.13	17.09	15.61	20.33	14.3	19.6	19.96	18.07	21.11	22.62	21.61	17.6	20.19	17.32	16.01	17.24	18.44
AT1G15250	13.51	13.52	24.32	22.21	12.82	13.94	16.4	24.96	16.04	17.09	20.54	30.43	15.03	19.42	23.48	30.24	11.39	14.01	15.59	12.4
AT1G15260	9.28	8.82	10.33	6.45	14.06	10.27	9.06	7.6	9.36	15.92	7.57	6.98	10.79	12.52	10.1	13.3	16.29	11.56	16.02	14.42
AT1G15270	503.17	562.83	586.91	538.4	494.27	558.5	483.09	578.35	475.73	511.09	424.02	455.56	420.83	440.83	420.26	469.8	447.11	439.02	532.78	491.49
AT1G15280	14.39	14.44	18.63	20.59	19.13	19.77	22.72	23.08	19.82	23.28	25.56	26.97	23.43	21.89	21.54	25.01	21.29	18.3	20.8	22.43
AT1G15290	3.31	4.36	4.75	5.72	5.74	6.49	6.71	6.52	7.76	10.5	10.29	12.16	7.68	6.87	5.78	8.78	6.73	7.83	6.8	8.12
AT1G15300	0.85	1.15	0.9	1.11	0.16	0.32	0.41	0.21	0.45	1.02	0.84	0.95	0.51	0.62	0.43	0.3	0.96	0.75	1.16	1.02
AT1G15310	6.13	6.05	6.48	8.5	8.13	8.35	8.08	8.39	7.62	9.37	8.37	9.39	14.84	11.33	11.36	12.41	10.1	7.7	9.31	9.7
AT1G15320	0	0.34	0	0.12	0.2	0.07	0	0.13	0.19	0.2	0.13	0.12	0.78	0.52	0.11	0.58	0.27	0.1	0	0.1
AT1G15330	19.78	22.94	14.57	14.9	16.24	23.5	9.5	18.45	21.38	32.81	16.52	18.24	204.88	206.8	135.84	168.88	19.94	27.33	36.79	21.99
AT1G15340	37.7	52	38.95	47.11	65.46	55.57	50	77.52	52.03	65.6	47.33	45.84	56.76	53.89	53.11	64.95	62.32	62.87	67.46	69.34
AT1G15350	175.34	184.74	232.34	204.52	182.63	141.84	250.75	208.93	146.68	135.71	156.05	132.18	109.93	116.37	113.75	113.74	164.15	122.93	151.79	140.74
AT1G15360	0	0	0	0	0	0	0	0	0	0	0	0	0	0	0	0	0	0	0	0
AT1G15370	84.75	95.02	89.72	91.58	86.09	78.8	76.42	127.07	91.46	86.58	81.67	74.58	81.4	70.56	74.99	70.44	84.78	77.39	95.36	88.85
AT1G15380	4.1	5.63	10.27	8.04	8.55	7.62	10.45	4.13	12.14	10.98	8.21	6.46	4.41	3.88	3.52	2.85	30.05	16.13	13.42	17.25
AT1G15385	3.11	2.34	0.94	1.28	1.03	2.71	2.02	0.45	0.99	1.83	2.09	1.88	0.68	1.7	2.23	1.75	0.35	0.5	0.53	0.27
AT1G15390	11.41	11.24	16.69	21	8.08	13.96	15.75	28.03	15.07	18.3	26.09	28.91	12.28	14.98	14.46	16.76	13.83	13.59	17.97	14.33
AT1G15400	180.56	233.52	154.5	138.88	209.2	180.04	180.65	227.74	143.96	148.29	107.28	104.85	139.04	126.37	131.97	122.65	192.71	154.34	192.48	172.39
AT1G15405	1045.4	313.18	235.33	125.37	101.3	416.83	165.99	304.73	99.11	77.44	111.89	140.88	62.9	288.37	399.25	213.1	96.46	545.95	168.39	174.4
AT1G15410	12.45	15.35	11.6	14.07	19.02	15.27	16.05	12.99	14.49	15.41	14.32	11.95	13.31	13.71	12.53	14.3	16.56	13.31	14.55	14.48
AT1G15415	0	0.32	0	0	0.56	0	0	0.25	0	0.28	0.38	0	1.1	1.47	0	0	0.38	0	0.57	0.29
AT1G15420	13.82	15.5	22.71	26.99	14.42	16.99	19.51	30.67	20.61	21.71	34.92	37.91	34.07	30.97	30.85	33.93	15.77	14.37	17.89	16.57
AT1G15430	15.57	16.13	14.98	15.76	16.12	13.45	18.83	17.08	11.64	14.08	17.21	12.48	14.41	13.09	16.18	16.98	16.23	11.85	14.24	13.85
AT1G15440	4.16	4.56	7.5	10.46	4.77	5.24	6.11	9.16	8.26	9.45	15.65	16.75	11.02	12.83	10.74	13.8	3.86	5.72	5.44	5.23
AT1G15450	0	0	0	0	0	0	0	0	0	0	0	0	0	0	0	0	0	0	0	0
AT1G15460	8.54	10.19	3.95	3.65	7.54	6.83	3.04	4.42	7.12	6.29	3.18	2.55	9.18	7.39	9.22	8.37	12.45	9.13	11.02	9.95
AT1G15470	14.74	16.2	18.85	19.39	18.06	17.89	18.35	23.37	21.9	23.34	29.38	28.88	24.72	21.25	22.34	24.16	18.24	18.04	21.13	18.12
AT1G15480	1.47	1.67	3.39	3.28	2.63	1.79	2.26	3.92	4.88	3.94	5.94	7.03	6.33	5.48	4.86	4.84	1.94	2.84	2.33	2.65
AT1G15490	5.7	6.81	5.5	8.54	6.85	7.69	9.3	7.34	7.79	7.6	7.89	6.27	9.79	7.92	7.67	8.26	5.96	8.19	7.31	6.97
AT1G15500	78.15	92.45	138.15	144.45	95.68	102.67	126.96	109.52	123.27	163.84	174.84	225.49	267.04	303.66	203.08	256.48	100.25	116.6	106.6	106.03
AT1G15510	1.16	0.73	1.46	1.94	1.2	1.35	1.93	2.96	2.04	2.38	3.45	5.02	2.21	2.53	2.66	3.51	1.04	1.51	1.84	0.92
AT1G15520	0.19	0.3	0.14	0.11	0.09	0.05	0	0.04	0.19	0.23	0.12	0.14	0.03	0.09	0.02	0.09	1.83	0.99	0.59	0.96
AT1G15530	5.18	6.21	6.39	6.61	6.31	6.94	9.12	5.62	7.6	7.15	6.22	6.41	5.01	6.44	4.8	5.23	7.25	6.59	7.42	8.3
AT1G15540	0.57	0.67	0.43	1.03	0.47	0.62	0.52	0.31	0.57	0.48	0.32	0.43	0.47	0.31	0.64	0.35	0.97	0.46	0.85	0.86
AT1G15550	51.21	63.33	32.18	29.43	69.42	71.09	37.44	28.15	62.33	63.55	30.12	28.67	52.54	51.69	43.82	53.86	56.6	62.87	68.26	67.07
AT1G15560	0.08	0	0	0.08	0	0	0.06	0	0	0	0	0	0	0	0	0	0	0	0	0
AT1G15570	8.49	9.89	8.82	10.57	10.66	11.17	8.13	10.2	16.6	20	11.53	16.1	15.61	13.73	11.23	12.61	11.68	10.5	12.55	11.99
AT1G15580	7.38	7.61	4.08	5.15	9.05	8.74	5.85	6.43	7.98	7.78	4.79	4.08	1.82	2.86	5.78	7.09	13.29	10.47	11.91	11.72
AT1G15590	0	0	0	0	0	0	0	0	0	0	0	0	0	0	0	0	0	0	0	0
AT1G15600	0	0	0.11	0.33	0.71	0.27	0.54	0.08	0.26	0	0.24	0.22	1.05	0.12	0.58	0	0	0.26	0.09	0.09
AT1G15610	0	0	0	0	0	0.09	0.27	0.14	0.15	0.31	0.42	0.19	0	0	0	0.15	0	0	0	0
AT1G15620	1.73	1.18	0.16	0.65	0.78	0.88	0.68	0.69	2.51	1.18	0	0.16	1.2	0.51	1.13	0.63	1.42	1.38	1.07	0.82
AT1G15630	7.95	4.75	7.25	7.02	6.46	5.11	10.07	4.23	4.43	4.44	4.79	2.67	4.54	3.31	4.56	2.65	4.43	3.03	3.85	5.35
AT1G15640	5.95	7.13	12.36	11.73	4.39	2.36	5.78	4.15	5.45	5.5	5.37	6.64	4	2.62	2.85	1.94	6.58	3.55	5.15	4.05
AT1G15650	0	0	0	0	0	0	0	0	0	0	0	0	0	0	0	0	0	0	0	0
AT1G15660	6.8	9.34	9.74	11.56	8.43	9.64	10.07	14.83	13.75	14.49	16.44	19.62	13.08	14.23	12.88	14.55	11.18	12.65	10.54	11.69
AT1G15670	29.78	32.27	39.02	37.58	38.57	31.41	50.39	25.47	30.67	33.19	33.72	30.12	27.09	21.07	26.74	29.71	29.57	23.38	27.61	26.2
AT1G15680	0	0	0	0	0	0	0	0	0	0	0	0	0	0	0	0	0	0	0	0
AT1G15690	333.99	368.61	525.5	655.47	358.94	392.73	484.85	461.91	645.83	633.76	838.33	866.14	481.25	525.46	505.84	580.87	391.02	395.83	442.92	421.13
AT1G15700	3.62	3.9	3.96	3.29	3.34	3.25	4.47	4.34	3.91	4.09	4.04	6.33	5.68	5.23	5.66	4.55	3.49	4.26	4.78	5.8
AT1G15710	9.14	7	13.07	15.16	10.18	10.52	11.6	13.11	15.07	15.46	21.97	17.61	13.64	14.21	11.39	13.95	10	9.79	11.37	9.97
AT1G15720	1.43	2.44	1.8	2.31	1.77	1.95	2.6	3.85	2.07	2.84	3.9	4.24	2.63	2.93	2.67	2.38	1.72	1.65	1.82	2.24
AT1G15730	5.87	9.43	16.28	16.13	14.47	14.42	16.6	17.3	17.66	24.2	25.08	31.93	18.72	15.98	14.37	18.75	14.82	15.61	15.94	17.3
AT1G15740	45.92	49.45	56.16	48.05	74.66	53.4	86.2	38.15	41.46	42.5	38.94	35.14	63.97	55.69	44.39	46.91	65.25	52.6	47.53	58.91
AT1G15750	38.49	47.14	44.54	52.23	68.92	56.6	63.5	46.22	78.13	74.3	74.49	73.28	71.82	65.6	58.08	68.7	68.25	61.71	62.55	66.88
AT1G15757	0	0	0	0	0	0	0	0	0	0	0	0	0	0	0	0	0	0	0	0
AT1G15760	12.87	7.22	7.23	12.75	5.32	7.54	4.29	13.18	17.37	19.28	17.41	15.23	7.28	8.37	8.01	11.73	5.32	6.13	5.67	8.12
AT1G15770	0	0	0	0	0	0	0	0	0	0	0	0	0	0	0	0	0	0	0	0
AT1G15772	0	0	0	0	0	0.09	0	0	0	0	0.16	0	0	0	0	0.12	0	0	0	0
AT1G15780	13	15.09	14.57	18.13	21.09	19.44	22.04	15.47	23.05	22.17	23.38	22.82	22.28	19.63	20.92	24.7	23.58	18.72	19.9	21.94
AT1G15790	2.59	1.05	1.75	4.01	0.92	1.15	1.98	2.62	1.33	1.4	1.66	1.68	1.41	1.42	1.17	2.39	1.89	1.33	1.1	1.28
AT1G15800	10.42	12.78	15.1	14.92	16.37	12.89	13.08	13.89	13.39	16.16	13.47	12.94	12.45	9.43	7.79	11.37	15.81	13.53	15.94	16.59
AT1G15810	17.64	19.25	24.48	34.92	17.84	22.81	26.41	36.7	30.44	31.23	40.08	43.35	32.69	27.85	27.08	32.83	21.02	20.68	22.83	21.17
AT1G15820	48.64	56.65	90.89	60.95	125.08	94.03	116.94	67.61	50.84	75.61	53.66	49.17	7.51	8.89	17.76	22.53	249.34	162.66	159.75	158.85
AT1G15825	1.41	0	3.78	2.41	1.55	0	3.04	2.74	0.75	1.18	3.14	4.73	1.53	0.51	0.84	0.38	0	0.37	0	0.81
AT1G15830	0.09	0.17	0.09	0.37	0	0.34	0.26	0.2	0.07	0.23	0.1	0.09	0	0.1	0.41	0.36	0.31	0.22	0.23	0.23
AT1G15840	0	0	0	0.15	0.5	0	0	0	0	0.13	0	0.15	0.16	0.33	0.27	0	0	0	0	0
AT1G15850	0	0	0	0	0	0	0	0	0	0	0	0	0	0	0	0	0	0	0	0
AT1G15860	61.5	65.15	60.98	66.1	67.7	62.74	61.55	59.27	57.99	62.41	62.39	57.9	59.04	53.97	54.72	61.64	70.97	62.44	73.91	73.94
AT1G15870	3.35	3.94	6.05	6.33	3.69	3.3	3.14	5.19	4.57	6.19	9.04	8.17	7.45	6.1	6.42	6.42	4.27	3.13	3.43	5.07
AT1G15880	27.03	30.31	32.67	25.45	30.72	22.57	27.52	23.38	22.85	25.81	24	20.57	22.21	21.59	21.06	22.29	28.21	25.97	27.19	28.47
AT1G15885	0	0	0	0	0	0	0	0	0	0	0	0	0	0	0	0	0	0	0	0
AT1G15890	0.5	0.95	0.78	1.37	0.57	0.55	1.16	1.19	0.97	1.17	1.44	0.95	1.74	1.6	0.93	1.11	0.73	0.88	0.89	1.16
[truncated: 31,887 more rows]
