# Supplementary material for: Epigenetic silencing of a multifunctional plant stress regulator
Source: eLife. 2019 Aug 16;8:e47835. doi: 10.7554/eLife.47835 (PMC6739875; doi:10.7554/eLife.47835)
Supplement: Supplementary file 2. — Table displaying all generated sequencing samples. [file elife-47835-supp2.xlsx]

## Sheet: Sequencing samples
Supplementary File 2: Sequencing samples
number	assay	feature	replicate	name in AnnoJ
1	ChIP-seq	H3K27me3	1	Ler_3d_air_H3K27me3_rep1
2	ChIP-seq	H3K27me3	1	ein6-1_3d_air_H3K27me3_rep1
3	ChIP-seq	H3K27me3	1	een-1_3d_air_H3K27me3_rep1
4	ChIP-seq	H3K27me3	1	ein6-1 een-1_3d_air_H3K27me3_rep1
5	ChIP-seq	H2A.Z	1	Ler_3d_air_H2A.Z_rep1
6	ChIP-seq	H2A.Z	1	ein6-1_3d_air_H2A.Z_rep1
7	ChIP-seq	H2A.Z	1	een-1_3d_air_H2A.Z_rep1
8	ChIP-seq	H2A.Z	1	ein6-1 een-1_3d_air_H2A.Z_rep1
9	ChIP-seq	IgG	1	Ler_3d_air_IgG_rep1
10	ChIP-seq	H3K27me3	2	Ler_3d_air_H3K27me3_rep2
11	ChIP-seq	H3K27me3	2	ein6-1_3d_air_H3K27me3_rep2
12	ChIP-seq	H3K27me3	2	een-1_3d_air_H3K27me3_rep2
13	ChIP-seq	H3K27me3	2	ein6-1 een-1_3d_air_H3K27me3_rep2
14	ChIP-seq	H2A.Z	2	Ler_3d_air_H2A.Z_rep2
15	ChIP-seq	H2A.Z	2	ein6-1_3d_air_H2A.Z_rep2
16	ChIP-seq	H2A.Z	2	een-1_3d_air_H2A.Z_rep2
17	ChIP-seq	H2A.Z	2	ein6-1 een-1_3d_air_H2A.Z_rep2
18	ChIP-seq	IgG	2	Ler_3d_air_IgG_rep2
19	ChIP-seq	H3K4me3	1	Ler_3d_air_H3K4me3
20	ChIP-seq	H3K4me3	1	ein6-1_3d_air_H3K4me3
21	ChIP-seq	H3K4me3	1	een-1_3d_air_H3K4me3
22	ChIP-seq	H3K4me3	1	ein6-1 een-1_3d_air_H3K4me3
23	ChIP-seq	H2Aub	1	Ler_3d_air_H2Aub
24	ChIP-seq	H2Aub	1	ein6-1_3d_air_H2Aub
25	ChIP-seq	H2Aub	1	een-1_3d_air_H2Aub
26	ChIP-seq	H2Aub	1	ein6-1 een-1_3d_air_H2Aub
27	ChIP-seq	IgG	1	Ler_IgG_(H3K4me3/H2Aub)
28	ChIP-seq	H3K27me3	1	Col-0_3d_air_H3K27me3
29	ChIP-seq	H3K27me3	1	ref6-1_3d_air_H3K27me3
30	ChIP-seq	H3K27me3	1	een-2_3d_air_H3K27me3
31	ChIP-seq	H3K27me3	1	ref6-1 een-2_3d_air_H3K27me3
32	ChIP-seq	H3K27me3	1	ino80-1_3d_air_H3K27me3
33	ChIP-seq	H3K27me3	1	ref6-1 ino80-1_3d_air_H3K27me3
34	ChIP-seq	H3K27me3	1	arp5-1_3d_air_H3K27me3
35	ChIP-seq	H3K27me3	1	ref6-1 arp5-1_3d_air_H3K27me3
36	ChIP-seq	H2A.Z	1	Col-0_3d_air_H2A.Z
37	ChIP-seq	H2A.Z	1	ref6-1_3d_air_H2A.Z
38	ChIP-seq	H2A.Z	1	een-2_3d_air_H2A.Z
39	ChIP-seq	H2A.Z	1	ref6-1 een-2_3d_air_H2A.Z
40	ChIP-seq	H2A.Z	1	ino80-1_3d_air_H2A.Z
41	ChIP-seq	H2A.Z	1	ref6-1 ino80-1_3d_air_H2A.Z
42	ChIP-seq	H2A.Z	1	arp5-1_3d_air_H2A.Z
43	ChIP-seq	H2A.Z	1	ref6-1 arp5-1_3d_air_H2A.Z
44	ChIP-seq	IgG	1	Col-0_3d_air_IgG
45	ChIP-seq	H2A.Z	1	Ler_3d_ET_H2A.Z_rep1
46	ChIP-seq	H2A.Z	2	Ler_3d_ET_H2A.Z_rep2
47	ChIP-seq	H2A.Z	1	een-1_3d_ET_H2A.Z_rep1
48	ChIP-seq	H2A.Z	2	een-1_3d_ET_H2A.Z_rep2
49	ChIP-seq	H2A.Z	1	Col-0_3d_air_H2A.Z_(ET)
50	ChIP-seq	H2A.Z	1	Col-0_3d_ET_H2A.Z_(ET)
51	ChIP-seq	H2A.Z	1	ino80-8_3d_air_H2A.Z_(ET)
52	ChIP-seq	H2A.Z	1	ino80-8_3d_ET_H2A.Z_(ET)
53	ChIP-seq	IgG	2	Col-0_3d_air_IgG_(ET)
54	ChIP-seq	H2A.Z	1	Col-0 (pie1-1)_3d_air_H2A.Z
55	ChIP-seq	H2A.Z	1	pie1-1_3d_air_H2A.Z
56	ChIP-seq	IgG	1	Col-0 (pie1-1)_3d_air_IgG
57	ChIP-seq	H2A.Z	1	Col-0 HTA11:HTA11-GFP_3d_air_H2A.Z
58	ChIP-seq	GFP	1	Col-0 HTA11:HTA11-GFP_3d_air_GFP
59	ChIP-seq	FLAG	1	Ler 35S:EIN6-FLAG_3d_air_rep1
60	ChIP-seq	FLAG	1	Ler 35S:EIN6-FLAG_3d_air_rep2
61	ChIP-seq	FLAG	1	Ler 35S:EIN6-FLAG_3d_air_rep3
62	DAP-seq	HALO	1	EIN6_ZNF_DAP-seq
63	ChIP-seq	IgG	1	Col-0 35S:EEN-FLAG_3d_air_IgG
64	ChIP-seq	FLAG	1	Col-0 35S:EEN-FLAG_3d_air_rep1
65	ChIP-seq	FLAG	1	Col-0 35S:EEN-FLAG_3d_air_rep2
66	ChIP-seq	H3K27me2	1	Ler_seed_H3K27me3
67	ChIP-seq	H3K27me3	1	ein6-1 een-1_seed_H3K27me3
68	ChIP-seq	IgG	1	Ler_3d_root_IgG
69	ChIP-seq	H3K27me3	1	Ler_3d_root_H3K27me3
70	ChIP-seq	H3K27me3	1	ein6-1 een-1_3d_root_H3K27me3
71	ChIP-seq	IgG	1	Ler_3d_shoot_IgG
72	ChIP-seq	H3K27me3	1	Ler_3d_shoot_H3K27me3
73	ChIP-seq	H3K27me3	1	ein6-1 een-1_3d_shoot_H3K27me3
74	ChIP-seq	IgG	1	Ler_10d_seedling_IgG
75	ChIP-seq	H3K27me3	1	Ler_10d_seedling_H3K27me3
76	ChIP-seq	H3K27me3	1	ein6-1 een-1_10d_seedling_H3K27me3
77	ChIP-seq	H3K27me3	1	Ler_flower_H3K27me3
78	ChIP-seq	H3K27me3	1	ein6-1 een-1_flower_H3K27me3
79	ChIP-seq	H3K27me3	1	Ler_silique_H3K27me3
80	ChIP-seq	H3K27me3	1	ein6-1 een-1_silique_H3K27me3
81	ChIPreChIP-seq	H3K27me3/IgG	1	ein6-1 een-1_3d_air_H3K27me3/IgG_ChIP-reChIP-seq
82	ChIPreChIP-seq	H3K27me3/H2A.Z	1	ein6-1 een-1_3d_air_H3K27me3/H2A.Z_ChIP-reChIP-seq
83	MethylC-seq	5mC	1	Ler_3d_air_MethylC-seq
84	MethylC-seq	5mC	1	ein6-1_3d_air_MethylC-seq
85	MethylC-seq	5mC	1	een-1_3d_air_MethylC-seq
86	MethylC-seq	5mC	1	ein6-1 een-1_3d_air_MethylC-seq
87	RNA-seq	mRNA	1	Ler_air_rep1_RNA-seq
88	RNA-seq	mRNA	2	Ler_air_rep2_RNA-seq
89	RNA-seq	mRNA	1	Ler_ET_rep1_RNA-seq
90	RNA-seq	mRNA	2	Ler_ET_rep2_RNA-seq
91	RNA-seq	mRNA	1	ein6-1_air_rep1_RNA-seq
92	RNA-seq	mRNA	2	ein6-1_air_rep2_RNA-seq
93	RNA-seq	mRNA	1	ein6-1_ET_rep1_RNA-seq
94	RNA-seq	mRNA	2	ein6-1_ET_rep2_RNA-seq
95	RNA-seq	mRNA	1	een-1_air_rep1_RNA-seq
96	RNA-seq	mRNA	2	een-1_air_rep2_RNA-seq
97	RNA-seq	mRNA	1	een-1_ET_rep1_RNA-seq
98	RNA-seq	mRNA	2	een-1_ET_rep2_RNA-seq
99	RNA-seq	mRNA	1	ein6-1 een-1_air_rep1_RNA-seq
100	RNA-seq	mRNA	2	ein6-1 een-1_air_rep2_RNA-seq
101	RNA-seq	mRNA	1	ein6-1 een-1_ET_rep1_RNA-seq
102	RNA-seq	mRNA	2	ein6-1 een-1_ET_rep2_RNA-seq
103	RNA-seq	mRNA	1	ein2-45_air_rep1_RNA-seq
104	RNA-seq	mRNA	2	ein2-45_air_rep2_RNA-seq
105	RNA-seq	mRNA	1	ein2-45_ET_rep1_RNA-seq
106	RNA-seq	mRNA	2	ein2-45_ET_rep2_RNA-seq
107	RNA-seq	mRNA	1	Col-0_air_rep1_RNA-seq
108	RNA-seq	mRNA	2	Col-0_air_rep2_RNA-seq
109	RNA-seq	mRNA	1	een-2_air_rep1_RNA-seq
110	RNA-seq	mRNA	2	een-2_air_rep2_RNA-seq
111	RNA-seq	mRNA	1	ino80-8_air_rep1_RNA-seq
112	RNA-seq	mRNA	2	ino80-8_air_rep2_RNA-seq
113	RNA-seq	mRNA	1	arp5-1_air_rep1_RNA-seq
114	RNA-seq	mRNA	2	arp5-1_air_rep2_RNA-seq
