# Supplementary material for: Epigenetic silencing of a multifunctional plant stress regulator
Source: eLife. 2019 Aug 16;8:e47835. doi: 10.7554/eLife.47835 (PMC6739875; doi:10.7554/eLife.47835)
Supplement: Supplementary file 3. — Tables displaying Group I and Group II genes which were identified by SICER through the comparison of ein6-1 vs Ler (Group I) and ein6-1 een-1 vs ein6-1 (Group II). [file elife-47835-supp3.xlsx]

## Sheet: Group I
Supplementary File 3: Group I and Group II genes
SICER ein6-1H3K27me3 merge vs Ler H3K27me3 merge
Group I genes
chromosome	domain start	domain end	ChIP (reads)	CONTROL (reads)	p-value	fold change	FDR threshold	gene name
chr5	23311400	23314399	2884	98	0	28.2681	0	AT5G57565
chr5	23311400	23314399	2884	98	0	28.2681	0	AT5G57567
chr5	23311400	23314399	2884	98	0	28.2681	0	AT5G57570
chr3	3401600	3402799	890	36	0	23.7474	0	AT3G10870
chr3	19265000	19267799	2265	108	0	20.1452	0	AT3G51910
chr3	19265000	19267799	2265	108	0	20.1452	0	AT3G51915
chr4	18457600	18459199	1245	68	0	17.5869	0	AT4G39780
chr5	26073600	26074599	690	38	0	17.4419	0	AT5G65240
chr1	23830800	23833199	1863	104	0	17.2071	0	AT1G64210
chr1	23830800	23833199	1863	104	0	17.2071	0	AT1G64220
chr4	7962200	7963399	643	36	0	17.1568	0	AT4G13710
chr4	2736000	2737999	1426	82	0	16.7045	0	AT4G05370
chr4	2736000	2737999	1426	82	0	16.7045	0	AT4G05380
chr1	28300200	28302599	1457	84	0	16.6613	0	AT1G75410
chr1	29076600	29077399	307	18	3.46624e-251	16.383	3.79595e-250	AT1G77380
chr1	1167600	1168799	903	53	0	16.3659	0	AT1G04360
chr5	16723200	16724999	1486	90	0	15.86	0	AT5G41780
chr3	16413000	16416399	1944	118	0	15.8249	0	AT3G44940
chr5	19983400	19985799	1449	88	0	15.8166	0	AT5G49290
chr5	19983400	19985799	1449	88	0	15.8166	0	AT5G49300
chr3	1896000	1898799	2497	154	0	15.5749	0	AT3G06270
chr3	1896000	1898799	2497	154	0	15.5749	0	AT3G06280
chr1	5040800	5041999	814	51	0	15.3314	0	AT1G14680
chr4	6441800	6443599	1130	72	0	15.0756	0	AT4G10390
chr1	18178400	18182399	2536	164	0	14.8537	0	AT1G49150
chr1	18178400	18182399	2536	164	0	14.8537	0	AT1G49160
chr3	9301800	9303599	1236	80	0	14.8408	0	AT3G25590
chr3	19182200	19184199	1780	116	0	14.7397	0	AT3G51710
chr5	18599800	18601799	1556	104	0	14.3716	0	AT5G45850
chr1	28359400	28361399	1207	81	0	14.3136	0	AT1G75530
chr5	15929000	15930199	576	39	0	14.1868	0	AT5G39785
chr4	445800	446799	620	42	0	14.1798	0	AT4G01023
chr2	15104600	15105799	1032	70	0	14.1615	0	AT2G35950
chr1	2197800	2199999	2030	139	0	14.0284	0	AT1G07160
chr3	5619400	5620999	1112	77	0	13.8721	0	AT3G16520
chr4	17569800	17571799	1385	98	0	13.5754	0	AT4G37370
chr4	18251800	18253199	1395	99	0	13.5353	0	AT4G39190
chr1	4967000	4970199	2062	147	0	13.4741	0	AT1G14518
chr1	4967000	4970199	2062	147	0	13.4741	0	AT1G14520
chr2	14557000	14558199	712	51	0	13.4103	0	AT2G34555
chr5	4818800	4821799	1716	124	0	13.293	0	AT5G14890
chr4	12385600	12387399	1176	85	0	13.2897	0	AT4G23780
chr5	17987400	17989199	1029	75	0	13.179	0	AT5G44590
chr1	6520600	6522199	617	45	0	13.1705	0	AT1G18879
chr1	6520600	6522199	617	45	0	13.1705	0	AT1G18880
chr2	7630600	7631999	1087	80	0	13.0517	0	AT2G17540
chr1	8573800	8575199	651	49	0	12.7618	0	AT1G24210
chr3	18709000	18711199	1780	135	0	12.6653	0	AT3G50420
chr3	18709000	18711199	1780	135	0	12.6653	0	AT3G50410
chr3	1436200	1438399	1409	107	0	12.649	0	AT3G05140
chr1	6709800	6710399	222	17	1.73097e-158	12.5439	1.27082e-157	AT1G19394
chr1	6709800	6710399	222	17	1.73097e-158	12.5439	1.27082e-157	AT1G19396
chr5	24661400	24663199	1188	92	0	12.4039	0	AT5G61340
chr1	613200	616399	2765	215	0	12.3533	0	AT1G02800
chr3	8458000	8462399	2572	200	0	12.3529	0	AT3G23570
chr3	8458000	8462399	2572	200	0	12.3529	0	AT3G23580
chr2	18883400	18885199	964	75	0	12.3465	0	AT2G45890
chr2	18603600	18604799	964	76	0	12.184	0	AT2G45120
chr5	25633600	25635799	1451	115	0	12.1199	0	AT5G64060
chr3	6793200	6796399	1602	127	0	12.1168	0	AT3G19560
chr1	16923400	16925399	1479	118	0	12.0397	0	AT1G44810
chr2	7942000	7943199	901	72	0	12.0204	0	AT2G18260
chr1	27573000	27574399	626	51	0	11.7905	0	AT1G73340
chr1	3471800	3472799	515	42	0	11.7784	0	AT1G10530
chr2	917200	918599	807	66	0	11.7451	0	AT2G03090
chr1	25336400	25341199	2785	228	0	11.7333	0	AT1G67600
chr1	25336400	25341199	2785	228	0	11.7333	0	AT1G67620
chr5	26609200	26610599	927	76	0	11.7164	0	AT5G66660
chr2	17808000	17809799	1168	96	0	11.6869	0	AT2G42800
chr1	623800	625799	1105	91	0	11.664	0	AT1G02820
chr1	623800	625799	1105	91	0	11.664	0	AT1G02830
chr2	16366600	16368399	1433	120	0	11.4708	0	AT2G39210
chr5	2653800	2655999	1816	155	0	11.2541	0	AT5G08250
chr3	1513000	1515799	1712	147	0	11.187	0	AT3G05310
chr3	1513000	1515799	1712	147	0	11.187	0	AT3G05320
chr3	10229000	10230799	1264	109	0	11.1391	0	AT3G27620
chr5	23901400	23903999	2377	206	0	11.0838	0	AT5G59230
chr5	23901400	23903999	2377	206	0	11.0838	0	AT5G59240
chr5	23901400	23903999	2377	206	0	11.0838	0	AT5G59250
chr4	17147200	17148399	918	80	0	11.0225	0	AT4G36240
chr1	19958400	19961399	1813	158	0	11.0222	0	AT1G53470
chr2	18591600	18592599	389	34	8.41045e-255	10.99	9.29399e-254	AT2G45080
chr2	18286400	18288399	1074	94	0	10.975	0	AT2G44230
chr1	19156200	19158399	998	88	0	10.8937	0	AT1G51670
chr5	23734200	23737399	1250	111	0	10.8172	0	AT5G58770
chr5	23734200	23737399	1250	111	0	10.8172	0	AT5G58780
chr2	14726600	14731199	3411	304	0	10.7779	0	AT2G34910
chr2	14726600	14731199	3411	304	0	10.7779	0	AT2G34920
chr3	237200	238799	1234	110	0	10.7758	0	AT3G01630
chr5	19254000	19255599	617	55	0	10.7758	0	AT5G47460
chr5	19254000	19255599	617	55	0	10.7758	0	AT5G47470
chr2	9443200	9444199	816	73	0	10.7373	0	AT2G22200
chr3	21818600	21820599	1325	119	0	10.6954	0	AT3G59030
chr1	27718600	27720999	1836	166	0	10.6241	0	AT1G73700
chr5	1241400	1243399	1189	108	0	10.5751	0	AT5G04400
chr3	1038800	1039799	615	56	0	10.5491	0	AT3G04010
chr2	16840200	16841999	647	59	0	10.5337	0	AT2G40320
chr5	21470200	21472999	1491	136	0	10.5309	0	AT5G52930
chr5	21470200	21472999	1491	136	0	10.5309	0	AT5G52940
chr3	3533200	3534999	1490	137	0	10.4471	0	AT3G11280
chr1	4695200	4695999	228	21	6.45699e-146	10.429	4.45308e-145	AT1G13700
chr3	18546800	18548199	608	56	0	10.429	0	AT3G50030
chr4	12383400	12384399	358	33	3.15152e-227	10.4207	3.14084e-226	AT4G23770
chr3	378400	378999	171	16	3.93088e-109	10.2661	2.29687e-108	AT3G02125
chr1	2124800	2128199	1793	168	0	10.2518	0	AT1G06920
chr1	2124800	2128199	1793	168	0	10.2518	0	AT1G06923
chr1	2124800	2128199	1793	168	0	10.2518	0	AT1G06925
chr2	19251000	19254999	2919	274	0	10.2332	0	AT2G46860
chr2	19251000	19254999	2919	274	0	10.2332	0	AT2G46850
chr5	426400	433599	3330	313	0	10.2195	0	AT5G02160
chr5	426400	433599	3330	313	0	10.2195	0	AT5G02170
chr5	426400	433599	3330	313	0	10.2195	0	AT5G02180
chr3	604800	607199	1159	109	0	10.2137	0	AT3G02790
chr3	604800	607199	1159	109	0	10.2137	0	AT3G02800
chr1	23890800	23892799	1653	156	0	10.1783	0	AT1G64380
chr1	9355800	9358199	984	93	0	10.1634	0	AT1G26960
chr3	21232200	21235999	2571	243	0	10.163	0	AT3G57390
chr1	24828400	24829599	349	33	4.24399e-218	10.1587	4.0726e-217	AT1G66550
chr1	3577400	3579199	622	59	0	10.1267	0	AT1G10750
chr1	5616000	5617599	875	83	0	10.1265	0	AT1G16440
chr2	13319600	13321599	1307	124	0	10.1247	0	AT2G31250
chr1	24655600	24657599	1028	98	0	10.0762	0	AT1G66200
chr4	11135200	11136599	919	88	0	10.0314	0	AT4G20790
chr3	19767600	19768599	449	43	1.94278e-277	10.0301	2.33107e-276	AT3G53310
chr5	21240800	21243199	1430	137	0	10.0264	0	AT5G52310
chr5	9546400	9550599	3083	296	0	10.0048	0	AT5G27130
chr5	9546400	9550599	3083	296	0	10.0048	0	AT5G27140
chr1	23795000	23796599	637	62	0	9.86906	0	AT1G64100
chr1	23795000	23796599	637	62	0	9.86906	0	AT1G64105
chr1	23795000	23796599	637	62	0	9.86906	0	AT1G64107
chr1	2253200	2256799	2317	226	0	9.84794	0	AT1G07330
chr1	2253200	2256799	2317	226	0	9.84794	0	AT1G07340
chr1	28813400	28815199	813	80	0	9.76177	0	AT1G76770
chr3	22200200	22200999	254	25	1.40727e-155	9.75937	1.02261e-154	AT3G60110
chr1	28692200	28693399	385	38	8.49779e-234	9.73207	8.67161e-233	AT1G76480
chr1	22711000	22712199	424	42	1.44845e-256	9.69716	1.61104e-255	AT1G61560
chr2	19151600	19152399	373	37	7.03107e-226	9.68356	6.99092e-225	AT2G46650
chr5	23483600	23484999	745	74	0	9.67058	0	AT5G58010
chr3	3405800	3408999	2164	215	0	9.66823	0	AT3G10880
chr3	3405800	3408999	2164	215	0	9.66823	0	AT3G10890
chr1	16656600	16657599	441	44	1.74715e-265	9.62751	1.99798e-264	AT1G43910
chr1	28645400	28646799	757	76	0	9.56776	0	AT1G76360
chr2	19075400	19076599	408	41	1.02781e-244	9.55882	1.09603e-243	AT2G46480
chr1	19060200	19061199	368	37	5.91594e-221	9.55375	5.72209e-220	AT1G51410
chr5	1536000	1539199	2694	272	0	9.51386	0	AT5G05180
chr1	23774000	23775999	601	61	0	9.46395	0	AT1G64060
chr1	28648800	28650399	601	61	0	9.46395	0	AT1G76370
chr5	20885600	20886399	374	38	5.63576e-223	9.45401	5.50099e-222	AT5G51420
chr4	10235000	10235599	177	18	4.60743e-107	9.44558	2.65402e-106	AT4G18580
chr4	13817200	13817999	334	34	3.24811e-199	9.43617	2.86553e-198	AT4G27660
chr5	23363400	23363999	265	27	1.32873e-158	9.42779	9.76349e-158	AT5G57670
chr4	11519000	11519799	255	26	1.16341e-152	9.42095	8.31939e-152	AT4G21680
chr2	9229400	9231399	784	80	0	9.41356	0	AT2G21550
chr2	9229400	9231399	784	80	0	9.41356	0	AT2G21560
chr5	4467400	4467999	245	25	1.01934e-146	9.41356	7.06992e-146	AT5G13830
chr3	9311000	9313599	1263	129	0	9.40463	0	AT3G25610
chr1	5872000	5872999	362	37	4.39773e-215	9.39799	4.14095e-214	AT1G17180
chr3	9704000	9705999	762	78	0	9.38401	0	AT3G26490
chr1	7425000	7429199	2363	242	0	9.37943	0	AT1G21210
chr1	434800	439799	3554	364	0	9.37873	0	AT1G02230
chr1	434800	439799	3554	364	0	9.37873	0	AT1G02250
chr3	16330000	16330399	156	16	3.42799e-94	9.36554	1.8439e-93	AT3G44790
chr4	12004800	12006199	750	77	0	9.35618	0	AT4G22880
chr1	18542000	18543799	1118	115	0	9.33839	0	AT1G50040
chr4	12730400	12731199	233	24	7.94823e-139	9.32551	5.32232e-138	AT4G24670
chr4	10521200	10522799	1017	105	0	9.30378	0	AT4G19230
chr4	8374400	8376199	1169	121	0	9.2802	0	AT4G14590
chr3	217000	218999	1061	110	0	9.26511	0	AT3G01550
chr4	18462800	18465199	1060	110	0	9.25638	0	AT4G39790
chr1	18267400	18270199	1385	144	0	9.23879	0	AT1G49360
chr4	2328600	2330199	775	81	0	9.19062	0	AT4G04620
chr2	16848600	16850599	1107	116	0	9.1668	0	AT2G40340
chr3	10707400	10708599	744	78	0	9.16234	0	AT3G28560
chr1	1709800	1712999	1191	125	0	9.15229	0	AT1G05700
chr3	19898200	19900599	1448	152	0	9.15067	0	AT3G53690
chr3	19898200	19900599	1448	152	0	9.15067	0	AT3G53700
chr5	20993600	20995199	1141	120	0	9.1334	0	AT5G51670
chr4	16860800	16861999	456	48	6.6369e-265	9.12539	7.56944e-264	AT4G35510
chr5	25004200	25004799	216	23	3.98745e-126	9.02098	2.5329e-125	AT5G62240
chr4	12241200	12242599	488	52	5.80821e-281	9.01456	7.08867e-280	AT4G23450
chr4	9451800	9453199	694	74	0	9.00857	0	AT4G16790
chr1	913200	915999	1749	187	0	8.98413	0	AT1G03670
chr3	15825600	15826599	458	49	3.59531e-263	8.97837	4.0841e-262	AT3G44060
chr4	11494000	11494999	354	38	1.16247e-203	8.94845	1.04171e-202	AT4G21630
chr3	9070800	9073199	1786	192	0	8.93528	0	AT3G24850
chr4	10257200	10258799	651	70	0	8.93328	0	AT4G18630
chr1	693200	696399	1513	163	0	8.91619	0	AT1G03010
chr5	24655000	24656799	1319	143	0	8.86006	0	AT5G61320
chr4	15103200	15104599	553	60	0	8.85323	0	AT4G31000
chr2	1033600	1034199	221	24	2.73461e-127	8.84523	1.74487e-126	AT2G03410
chr1	21519800	21522199	1224	133	0	8.84011	0	AT1G58120
chr1	21519800	21522199	1224	133	0	8.84011	0	AT1G58122
chr1	9469400	9474999	2318	252	0	8.8357	0	AT1G27250
chr1	9469400	9474999	2318	252	0	8.8357	0	AT1G27270
chr1	9469400	9474999	2318	252	0	8.8357	0	AT1G27280
chr1	9469400	9474999	2318	252	0	8.8357	0	AT1G27260
chr1	7929400	7930599	423	46	1.24906e-240	8.83305	1.31067e-239	AT1G22460
chr5	23420200	23423399	1540	168	0	8.8052	0	AT5G57800
chr1	29539600	29540199	192	21	1.91404e-110	8.78233	1.12689e-109	AT1G78530
chr3	835800	838999	1051	115	0	8.77875	0	AT3G03510
chr3	835800	838999	1051	115	0	8.77875	0	AT3G03520
chr1	202200	204199	857	94	0	8.75752	0	AT1G01560
chr5	24082000	24084199	1430	157	0	8.74912	0	AT5G59780
chr5	4518000	4519399	645	71	0	8.72628	0	AT5G14000
chr5	25069000	25070199	908	100	0	8.72196	0	AT5G62430
chr5	23775800	23777999	924	102	0	8.70161	0	AT5G58880
chr1	5337000	5338799	648	72	0	8.64511	0	AT1G15520
chr1	5726800	5727199	162	18	1.17439e-92	8.64511	6.24802e-92	AT1G16730
chr3	16984400	16984799	162	18	1.17439e-92	8.64511	6.24802e-92	AT3G46230
chr1	2961000	2962399	429	48	2.73896e-239	8.58507	2.86349e-238	AT1G09170
chr3	10434800	10438199	1644	184	0	8.58246	0	AT3G28040
chr5	15949800	15951399	1427	160	0	8.56706	0	AT5G39850
chr3	19271600	19272399	293	33	1.17122e-163	8.52868	8.87361e-163	AT3G51930
chr1	8132600	8134199	798	90	0	8.51703	0	AT1G22980
chr3	20734600	20737599	895	101	0	8.51196	0	AT3G55880
chr1	3550000	3550799	407	46	1.34426e-225	8.49894	1.33192e-224	AT1G10690
chr2	10894400	10895799	901	102	0	8.48502	0	AT2G25600
chr1	26407600	26415199	5476	620	0	8.48398	0	AT1G70110
chr1	26407600	26415199	5476	620	0	8.48398	0	AT1G70120
chr1	26407600	26415199	5476	620	0	8.48398	0	AT1G70140
chr1	26407600	26415199	5476	620	0	8.48398	0	AT1G70130
chr4	9834000	9834799	247	28	8.07989e-138	8.47358	5.38933e-137	AT4G17670
chr5	26530200	26531199	695	79	0	8.45056	0	AT5G66440
chr4	11884800	11885399	211	24	6.86835e-118	8.44499	4.18827e-117	AT4G22570
chr1	18625200	18626199	316	36	7.08541e-175	8.43165	5.64385e-174	AT1G50280
chr5	19052200	19053399	465	53	8.44543e-256	8.42762	9.38124e-255	AT5G46915
chr5	24753800	24756199	823	94	0	8.41008	0	AT5G61560
chr1	24931400	24932599	376	43	6.01131e-207	8.39938	5.46139e-206	AT1G66830
chr1	1715000	1716199	428	49	5.79653e-235	8.39027	5.95069e-234	AT1G05710
chr2	17226800	17229399	1090	125	0	8.37615	0	AT2G41330
chr2	17226800	17229399	1090	125	0	8.37615	0	AT2G41340
chr5	18369800	18370999	514	59	4.92632e-281	8.36834	6.02961e-280	AT5G45340
chr3	22738400	22739799	513	59	4.13161e-280	8.35206	4.99954e-279	AT3G61450
chr5	6064200	6066399	1216	140	0	8.34322	0	AT5G18320
chr4	9831000	9832799	955	110	0	8.33947	0	AT4G17660
chr5	24212000	24217599	3498	403	0	8.33763	0	AT5G60130
chr5	24212000	24217599	3498	403	0	8.33763	0	AT5G60140
chr5	24212000	24217599	3498	403	0	8.33763	0	AT5G60142
chr5	17583000	17583999	621	72	0	8.2849	0	AT5G43755
chr3	18482400	18483799	595	69	0	8.28316	0	AT3G49830
chr5	576200	577199	447	52	1.61778e-242	8.25719	1.70808e-241	AT5G02560
chr5	576200	577199	447	52	1.61778e-242	8.25719	1.70808e-241	AT5G02570
chr4	855400	857599	1289	150	0	8.25448	0	AT4G01970
chr1	1645600	1647199	1175	137	0	8.23845	0	AT1G05560
chr1	1645600	1647199	1175	137	0	8.23845	0	AT1G05562
chr5	21743200	21744799	659	77	0	8.22096	0	AT5G53520
chr4	16712600	16714399	656	77	0	8.18354	0	AT4G35110
chr3	22048400	22053999	1999	235	0	8.17096	0	AT3G59690
chr3	22048400	22053999	1999	235	0	8.17096	0	AT3G59695
chr3	22048400	22053999	1999	235	0	8.17096	0	AT3G59700
chr5	15512200	15516599	2062	243	0	8.15099	0	AT5G38730
chr5	15512200	15516599	2062	243	0	8.15099	0	AT5G38740
chr5	147600	149399	1136	134	0	8.14332	0	AT5G01360
chr5	1332800	1333399	220	26	1.47435e-119	8.12788	9.05519e-119	AT5G04640
chr1	29298400	29300799	981	116	0	8.12342	0	AT1G77920
chr2	7758800	7760799	1215	144	0	8.10479	0	AT2G17845
chr2	7758800	7760799	1215	144	0	8.10479	0	AT2G17850
chr5	15906000	15907799	1096	130	0	8.09833	0	AT5G39750
chr1	9425600	9428799	2259	268	0	8.09673	0	AT1G27130
chr1	9425600	9428799	2259	268	0	8.09673	0	AT1G27135
chr1	9425600	9428799	2259	268	0	8.09673	0	AT1G27140
chr1	29508800	29513999	3852	457	0	8.09651	0	AT1G78430
chr1	29508800	29513999	3852	457	0	8.09651	0	AT1G78440
chr1	2344600	2346799	1186	141	0	8.07967	0	AT1G07620
chr1	12349000	12351399	2001	238	0	8.07603	0	AT1G33970
chr4	6370600	6373599	1174	140	0	8.05505	0	AT4G10250
chr4	6370600	6373599	1174	140	0	8.05505	0	AT4G10260
chr4	6370600	6373599	1174	140	0	8.05505	0	AT4G10265
chr1	10663000	10664599	1073	128	0	8.05226	0	AT1G30280
chr1	10663000	10664599	1073	128	0	8.05226	0	AT1G30282
chr3	14759600	14760599	427	51	1.66862e-227	8.0424	1.66882e-226	AT3G42670
chr5	4742600	4743599	611	73	0	8.03982	0	AT5G14700
chr5	17872200	17873599	543	65	5.28029e-288	8.02444	6.69333e-287	AT5G44360
chr1	7168400	7170599	967	116	0	8.00749	0	AT1G20680
chr1	18819800	18823199	1553	187	0	7.97734	0	AT1G50770
chr1	18819800	18823199	1553	187	0	7.97734	0	AT1G50780
chr4	17004600	17005399	340	41	1.57647e-180	7.96568	1.28697e-179	AT4G35900
chr1	523400	525799	771	93	0	7.96342	0	AT1G02520
chr4	1557800	1559399	613	74	0	7.95714	0	AT4G03510
chr1	707600	708999	530	64	2.01795e-279	7.9547	2.43841e-278	AT1G03050
chr3	19283200	19283999	273	33	2.70993e-145	7.94652	1.85988e-144	AT3G51960
chr5	3550400	3551599	379	46	5.93009e-200	7.91424	5.25334e-199	AT5G11160
chr1	2238400	2239999	1036	126	0	7.898	0	AT1G07280
chr1	29009000	29012199	1850	225	0	7.898	0	AT1G77210
chr5	22519600	22520599	476	58	1.23476e-249	7.88328	1.34188e-248	AT5G55590
chr4	18479000	18479599	221	27	2.77513e-117	7.86242	1.68143e-116	AT4G39830
chr3	1035400	1037999	2493	305	0	7.85146	0	AT3G04000
chr3	1035400	1037999	2493	305	0	7.85146	0	AT3G04010
chr1	28163600	28164399	335	41	4.99235e-176	7.84854	3.99904e-175	AT1G75000
chr5	6904600	6905799	416	51	1.37442e-217	7.83522	1.31301e-216	AT5G20430
chr1	3787800	3790599	847	104	0	7.82309	0	AT1G11280
chr1	29277400	29278399	480	59	4.08711e-250	7.81479	4.45302e-249	AT1G77855
chr2	16750200	16754199	2451	302	0	7.79587	0	AT2G40113
chr2	16750200	16754199	2451	302	0	7.79587	0	AT2G40116
chr5	14995800	14997799	1370	169	0	7.78685	0	AT5G37750
chr5	14995800	14997799	1370	169	0	7.78685	0	AT5G37760
chr3	22394000	22396199	1086	134	0	7.7849	0	AT3G60580
chr4	10065800	10066399	186	23	2.59506e-98	7.76807	1.42553e-97	AT4G18180
chr3	681000	681799	339	42	1.61439e-176	7.75315	1.29439e-175	AT3G03020
chr2	14454400	14455399	483	60	1.01376e-249	7.73257	1.10311e-248	AT2G34230
chr1	29833800	29835399	554	69	2.00138e-285	7.71238	2.48526e-284	AT1G79310
chr5	22108200	22109599	891	111	0	7.7105	0	AT5G54450
chr1	3876000	3877199	409	51	2.41473e-211	7.70338	2.23186e-210	AT1G11540
chr3	21156800	21158799	1504	188	0	7.68454	0	AT3G57157
chr3	21156800	21158799	1504	188	0	7.68454	0	AT3G57160
chr1	4739800	4740799	423	53	1.05643e-217	7.66642	1.0115e-216	AT1G13830
chr3	17920800	17923199	830	104	0	7.66607	0	AT3G48390
chr3	7624600	7628999	2082	261	0	7.66246	0	AT3G21660
chr3	7624600	7628999	2082	261	0	7.66246	0	AT3G21670
chr3	9892800	9893799	501	63	1.34857e-256	7.6388	1.50191e-255	AT3G26840
chr5	917200	921599	1691	213	0	7.62592	0	AT5G03620
chr5	917200	921599	1691	213	0	7.62592	0	AT5G03610
chr1	10343800	10345799	730	92	0	7.6219	0	AT1G29600
chr1	8579000	8579799	222	28	4.12899e-115	7.61593	2.47363e-114	AT1G24220
chr5	21117000	21117799	681	86	0	7.60636	0	AT5G51990
chr5	24995800	24996799	340	43	2.2383e-174	7.59519	1.77958e-173	AT5G62230
chr1	22824400	22826599	1359	172	0	7.5896	0	AT1G61800
chr3	2238200	2240399	1231	156	0	7.57986	0	AT3G07070
chr5	19207000	19213599	3752	476	0	7.57153	0	AT5G47330
chr5	19207000	19213599	3752	476	0	7.57153	0	AT5G47340
chr5	19207000	19213599	3752	476	0	7.57153	0	AT5G47350
chr5	16431200	16434399	2565	326	0	7.55784	0	AT5G41050
chr5	16431200	16434399	2565	326	0	7.55784	0	AT5G41040
chr4	16639000	16644999	4097	522	0	7.53917	0	AT4G34940
chr4	16639000	16644999	4097	522	0	7.53917	0	AT4G34950
chr2	18157600	18158999	706	90	0	7.53512	0	AT2G43840
chr4	1473800	1475999	1097	140	0	7.52673	0	AT4G03350
chr4	1473800	1475999	1097	140	0	7.52673	0	AT4G03360
chr3	20784600	20785599	376	48	3.43183e-191	7.52445	2.91313e-190	AT3G56000
chr1	26142000	26143399	812	104	0	7.49982	0	AT1G69530
chr3	9309000	9310199	304	39	1.37935e-154	7.4875	9.94696e-154	AT3G25610
chr4	9389800	9390599	257	33	4.68962e-131	7.48079	3.04701e-130	AT4G16680
chr1	1806200	1807599	506	65	4.74312e-255	7.47765	5.24819e-254	AT1G05950
chr5	19417200	19418599	794	102	0	7.47736	0	AT5G47950
chr2	13722800	13726199	1471	189	0	7.47616	0	AT2G32300
chr2	13722800	13726199	1471	189	0	7.47616	0	AT2G32310
chr5	5975800	5976399	202	26	1.9057e-103	7.46287	1.07666e-102	AT5G18060
chr1	17785000	17786199	396	51	6.95253e-200	7.45853	6.1527e-199	AT1G48150
chr1	3210600	3211999	519	67	1.47485e-260	7.44082	1.66207e-259	AT1G09880
chr1	27506600	27509199	2029	262	0	7.4389	0	AT1G73160
chr1	27506600	27509199	2029	262	0	7.4389	0	AT1G73165
chr5	23845200	23848799	1873	242	0	7.43448	0	AT5G59070
chr5	23845200	23848799	1873	242	0	7.43448	0	AT5G59080
chr1	28776800	28778999	1214	157	0	7.42757	0	AT1G76680
chr1	28776800	28778999	1214	157	0	7.42757	0	AT1G76690
chr1	30139000	30139999	540	70	3.91138e-270	7.41009	4.54604e-269	AT1G80120
chr5	7559200	7560199	578	75	1.03623e-288	7.40278	1.31548e-287	AT5G22740
chr3	9596000	9600199	1946	253	0	7.3884	0	AT3G26220
chr3	9596000	9600199	1946	253	0	7.3884	0	AT3G26230
chr1	23399400	23402199	1307	170	0	7.38507	0	AT1G63100
chr3	1770600	1771199	184	24	1.47192e-93	7.36435	7.89744e-93	AT3G05930
chr3	1770600	1771199	184	24	1.47192e-93	7.36435	7.89744e-93	AT3G05932
chr1	1674800	1675999	337	44	8.24498e-169	7.35708	6.41769e-168	AT1G05610
chr3	5427000	5427599	291	38	3.72579e-146	7.35593	2.57366e-145	AT3G15990
chr5	22865000	22868599	2117	277	0	7.34123	0	AT5G56460
chr5	25248800	25249799	397	52	7.45968e-198	7.33357	6.50701e-197	AT5G62900
chr4	9651000	9654399	2014	264	0	7.32797	0	AT4G17200
chr4	9651000	9654399	2014	264	0	7.32797	0	AT4G17210
chr2	13487800	13489599	732	96	0	7.32433	0	AT2G31730
chr2	19234200	19234999	305	40	1.5012e-152	7.32433	1.07259e-151	AT2G46790
chr3	19072800	19074599	754	99	0	7.31584	0	AT3G51375
chr3	19072800	19074599	754	99	0	7.31584	0	AT3G51380
chr4	13217600	13218399	251	33	7.96314e-126	7.30614	5.04332e-125	AT4G26070
chr2	9267000	9269199	1542	203	0	7.29653	0	AT2G21680
chr1	3352200	3352799	205	27	3.69828e-103	7.2932	2.08664e-102	AT1G10220
chr3	9573200	9575199	1677	221	0	7.28901	0	AT3G26170
chr3	22064200	22069199	4581	604	0	7.28537	0	AT3G59730
chr3	22064200	22069199	4581	604	0	7.28537	0	AT3G59740
chr3	1635200	1638399	1272	168	0	7.27287	0	AT3G05630
chr2	7513400	7514399	302	40	5.90757e-150	7.25229	4.16852e-149	AT2G17280
chr4	16445200	16448199	1515	201	0	7.2401	0	AT4G34400
chr3	7497400	7498399	301	40	4.30077e-149	7.22827	3.03222e-148	AT3G21310
chr5	9173400	9174599	947	126	0	7.21951	0	AT5G26230
chr3	2468000	2468999	323	43	1.47269e-159	7.21543	1.09059e-158	AT3G07730
chr1	9170000	9170999	614	82	7.42723e-300	7.19254	9.77805e-299	AT1G26540
chr3	19718400	19721399	988	132	0	7.1897	0	AT3G53200
chr3	19718400	19721399	988	132	0	7.1897	0	AT3G53210
chr1	2867400	2869399	681	91	0	7.18842	0	AT1G08920
chr1	6576200	6579199	935	125	0	7.18505	0	AT1G19040
chr1	6576200	6579199	935	125	0	7.18505	0	AT1G19050
chr3	10727800	10729599	643	86	0	7.18192	0	AT3G28620
chr3	10727800	10729599	643	86	0	7.18192	0	AT3G28630
chr2	19317400	19318999	770	103	0	7.18094	0	AT2G47010
chr1	520800	521799	829	111	0	7.17397	0	AT1G02510
chr5	24668000	24669399	687	92	0	7.17294	0	AT5G61350
chr1	3524400	3525999	552	74	4.19193e-269	7.16532	4.84571e-268	AT1G10650
chr1	214000	217399	1641	220	0	7.16496	0	AT1G01590
chr4	7211400	7212599	462	62	1.52298e-225	7.15778	1.5055e-224	AT4G12030
chr3	566400	567399	268	36	5.51483e-132	7.15089	3.59962e-131	AT3G02645
chr5	19839600	19840999	587	79	4.10501e-285	7.13738	5.09009e-284	AT5G48940
chr3	9279400	9282599	1220	165	0	7.10238	0	AT3G25550
chr3	9279400	9282599	1220	165	0	7.10238	0	AT3G25560
chr5	4662800	4664799	1278	173	0	7.09599	0	AT5G14470
chr1	27341200	27341799	199	27	5.34954e-98	7.07974	2.92732e-97	AT1G72620
chr3	9578200	9579999	1334	181	0	7.07954	0	AT3G26180
chr1	588400	589999	625	85	6.37853e-301	7.063	8.42341e-300	AT1G02700
chr1	588400	589999	625	85	6.37853e-301	7.063	8.42341e-300	AT1G02710
chr5	5902600	5904399	1242	169	0	7.05932	0	AT5G17860
chr5	6067400	6071999	2196	299	0	7.05487	0	AT5G18330
chr5	6067400	6071999	2196	299	0	7.05487	0	AT5G18340
chr4	13599600	13601599	1012	138	0	7.04416	0	AT4G27110
chr4	13978000	13979199	513	70	6.55128e-247	7.03959	7.05669e-246	AT4G28150
chr5	23344400	23346399	1748	239	0	7.02541	0	AT5G57640
chr5	23344400	23346399	1748	239	0	7.02541	0	AT5G57650
chr5	5963200	5968999	1843	252	0	7.0251	0	AT5G18010
chr5	5963200	5968999	1843	252	0	7.0251	0	AT5G18015
chr5	5963200	5968999	1843	252	0	7.0251	0	AT5G18020
chr5	5963200	5968999	1843	252	0	7.0251	0	AT5G18030
chr5	24248800	24249799	490	67	1.34432e-235	7.02505	1.38675e-234	AT5G60220
chr5	16441800	16446799	1907	261	0	7.0184	0	AT5G41080
chr5	16441800	16446799	1907	261	0	7.0184	0	AT5G41090
chr3	21868000	21868599	168	23	1.32275e-82	7.01632	6.68507e-82	AT3G59140
chr1	8171000	8172999	723	99	0	7.01506	0	AT1G23060
chr5	26913800	26915999	679	93	0	7.01318	0	AT5G67440
chr1	1278400	1280999	1853	254	0	7.00761	0	AT1G04610
chr1	1719000	1721399	1421	195	0	6.99983	0	AT1G05730
chr1	1719000	1721399	1421	195	0	6.99983	0	AT1G05740
chr1	28936600	28937999	801	110	0	6.99468	0	AT1G76994
chr1	1885000	1886799	648	89	0	6.9938	2.27308e-308	AT1G06170
chr5	22971800	22979199	6790	937	0	6.96078	0	AT5G56795
chr5	22971800	22979199	6790	937	0	6.96078	0	AT5G56800
chr5	22971800	22979199	6790	937	0	6.96078	0	AT5G56810
chr5	22971800	22979199	6790	937	0	6.96078	0	AT5G56820
chr4	13411600	13413399	1674	232	0	6.93099	0	AT4G26580
chr1	4461800	4465799	1888	262	0	6.92195	0	AT1G13090
chr1	4461800	4465799	1888	262	0	6.92195	0	AT1G13100
chr1	1965800	1966999	619	86	3.90037e-293	6.91385	5.01871e-292	AT1G06450
chr4	11270200	11270999	439	61	9.33933e-209	6.91294	8.53039e-208	AT4G21120
chr3	8294600	8296599	1137	158	0	6.91244	0	AT3G23240
chr2	18406400	18407199	446	62	5.79219e-212	6.90989	5.37099e-211	AT2G44590
chr4	11150200	11151799	1006	140	0	6.90237	0	AT4G20820
chr1	18668000	18668999	287	40	3.55383e-137	6.89207	2.36488e-136	AT1G50400
chr5	25005800	25011599	2084	291	0	6.87912	0	AT5G62250
chr5	25005800	25011599	2084	291	0	6.87912	0	AT5G62260
chr2	14113000	14115799	1045	146	0	6.8753	0	AT2G33300
chr2	14113000	14115799	1045	146	0	6.8753	0	AT2G33310
chr2	14539600	14541399	986	138	0	6.86319	0	AT2G34500
chr5	21428600	21429399	421	59	5.54864e-199	6.85422	4.87994e-198	AT5G52870
chr3	11260000	11260999	335	47	8.40194e-159	6.8466	6.17905e-158	AT3G29340
chr1	18732400	18734199	513	72	1.59456e-241	6.84405	1.67733e-240	AT1G50590
chr1	23683400	23683999	185	26	7.29134e-89	6.83481	3.81844e-88	AT1G63820
chr2	8985800	8987199	1038	146	0	6.82924	0	AT2G20880
chr1	3187000	3188599	611	86	1.97578e-286	6.8245	2.47509e-285	AT1G09812
chr3	1547200	1548199	362	51	8.39725e-171	6.81815	6.60858e-170	AT3G05390
chr3	883400	886599	1774	250	0	6.81619	0	AT3G03640
chr3	883400	886599	1774	250	0	6.81619	0	AT3G03650
chr3	7108200	7109399	596	84	3.51432e-279	6.81546	4.22859e-278	AT3G20380
chr5	4173000	4174799	1163	164	0	6.81183	0	AT5G13150
chr5	33000	36199	1056	149	0	6.80778	0	AT5G01090
chr5	33000	36199	1056	149	0	6.80778	0	AT5G01100
chr2	14718400	14721399	1006	142	0	6.80515	0	AT2G34890
chr3	21229800	21231399	602	85	1.48765e-281	6.80308	1.82606e-280	AT3G57380
chr5	24954600	24955199	205	29	1.15314e-97	6.79022	6.302e-97	AT5G62140
chr3	1640800	1642999	897	127	0	6.78448	0	AT3G05640
chr4	10609600	10611999	1425	202	0	6.77628	0	AT4G19460
chr5	1129800	1130999	817	116	0	6.76538	0	AT5G04140
chr2	11833200	11834399	570	81	2.15884e-265	6.75955	2.46547e-264	AT2G27770
chr4	16981000	16982399	605	86	1.97007e-281	6.75748	2.41475e-280	AT4G35840
chr3	20679800	20680999	408	58	9.13496e-191	6.7571	7.74656e-190	AT3G55720
chr5	9734800	9737999	2474	352	0	6.75126	0	AT5G27570
chr5	9734800	9737999	2474	352	0	6.75126	0	AT5G27580
chr2	12616600	12618799	667	95	0	6.7442	2.42416e-308	AT2G29410
chr2	12616600	12618799	667	95	0	6.7442	2.42416e-308	AT2G29420
chr5	1624400	1625799	715	102	0	6.73339	0	AT5G05490
chr1	19065000	19066999	970	139	0	6.70324	0	AT1G51420
chr2	17887000	17888599	801	115	0	6.69056	0	AT2G43010
chr2	15067600	15069599	799	115	0	6.67386	0	AT2G35890
chr3	3886000	3886799	250	36	7.97256e-117	6.67061	4.81344e-116	AT3G12190
chr4	16468600	16469799	534	77	6.19265e-246	6.6616	6.65359e-245	AT4G34440
chr1	10337000	10338999	984	142	0	6.65633	0	AT1G29570
chr1	10337000	10338999	984	142	0	6.65633	0	AT1G29580
chr3	22195400	22197399	983	142	0	6.64956	0	AT3G60100
chr4	17336400	17338999	803	116	0	6.64945	0	AT4G36790
chr4	17336400	17338999	803	116	0	6.64945	0	AT4G36791
chr4	12488200	12490599	789	114	0	6.64814	0	AT4G24040
chr4	10690400	10691799	560	81	4.05443e-257	6.64096	4.53321e-256	AT4G19645
chr4	10690400	10691799	560	81	4.05443e-257	6.64096	4.53321e-256	AT4G19650
chr4	10366200	10366799	227	33	1.53836e-105	6.60754	8.7843e-105	AT4G18910
chr1	29957600	29959399	846	123	0	6.60683	0	AT1G79620
chr1	1701200	1704799	1994	290	0	6.60473	0	AT1G05675
chr1	1701200	1704799	1994	290	0	6.60473	0	AT1G05680
chr1	440800	442599	618	90	7.04931e-282	6.5959	8.66537e-281	AT1G02260
chr1	28544200	28545399	350	51	7.33217e-161	6.59213	5.4869e-160	AT1G76062
chr1	28544200	28545399	350	51	7.33217e-161	6.59213	5.4869e-160	AT1G76065
chr4	18248400	18249599	377	55	7.06871e-173	6.58426	5.5888e-172	AT4G39180
chr5	8010200	8011599	418	61	2.61261e-191	6.58225	2.21993e-190	AT5G23750
chr4	2229600	2230799	897	131	0	6.57732	0	AT4G04480
chr5	16924200	16924999	465	68	3.96419e-212	6.56859	3.67992e-211	AT5G42325
chr3	19185000	19185999	328	48	2.05906e-150	6.56388	1.45413e-149	AT3G51720
chr5	17176400	17177599	362	53	1.22173e-165	6.56086	9.37278e-165	AT5G42830
chr1	4467400	4468799	614	90	1.33148e-278	6.55321	1.59984e-277	AT1G13110
chr5	23841600	23842799	409	60	1.83449e-186	6.54787	1.53281e-185	AT5G59050
chr3	7504800	7510399	3476	512	0	6.52135	0	AT3G21330
chr3	18815400	18817599	1357	200	0	6.51745	0	AT3G50660
chr4	13738000	13738599	217	32	7.23539e-100	6.51385	3.99774e-99	AT4G27480
chr5	22895000	22896599	434	64	7.61375e-197	6.51385	6.6211e-196	AT5G56550
chr5	4461000	4462999	657	97	3.74595e-296	6.50611	4.86403e-295	AT5G13820
chr4	9933600	9935399	906	134	0	6.49458	0	AT4G17880
chr1	526600	528799	676	100	3.82865e-304	6.49344	5.11146e-303	AT1G02520
chr4	12963200	12966599	1458	216	0	6.48383	0	AT4G25350
chr1	24677200	24678399	753	112	0	6.4581	0	AT1G66230
chr4	1060200	1062199	1405	209	0	6.45741	0	AT4G02410
chr3	1050000	1051399	470	70	3.30275e-211	6.44953	3.04932e-210	AT3G04050
chr5	24758400	24760599	845	126	0	6.4419	0	AT5G61570
chr1	427000	430799	2525	377	0	6.43351	0	AT1G02210
chr1	427000	430799	2525	377	0	6.43351	0	AT1G02220
chr1	25468000	25469199	308	46	4.18639e-139	6.43163	2.80992e-138	AT1G67900
chr5	22131400	22133799	1404	210	0	6.42208	0	AT5G54510
chr1	29391600	29396199	2479	371	0	6.41846	0	AT1G78120
chr1	29391600	29396199	2479	371	0	6.41846	0	AT1G78110
chr4	17221800	17226599	2315	347	0	6.4084	0	AT4G36490
chr4	17221800	17226599	2315	347	0	6.4084	0	AT4G36500
chr4	9359200	9359999	260	39	1.85557e-117	6.40379	1.12588e-116	AT4G16620
chr5	6902600	6903799	320	48	6.7021e-144	6.40379	4.55946e-143	AT5G20420
chr2	8327800	8329999	1125	169	0	6.39431	0	AT2G19190
chr1	20548800	20552399	1967	296	0	6.38323	0	AT1G55060
chr1	20548800	20552399	1967	296	0	6.38323	0	AT1G55070
chr4	17210000	17211999	1309	197	0	6.38266	0	AT4G36440
chr4	17210000	17211999	1309	197	0	6.38266	0	AT4G36450
chr5	6576800	6578399	445	67	2.35207e-198	6.37989	2.058e-197	AT5G19490
chr3	2750000	2751999	783	118	0	6.37394	0	AT3G09010
chr4	1476800	1479599	1192	180	0	6.36109	0	AT4G03370
chr5	17882200	17883399	408	62	1.00824e-180	6.32116	8.23883e-180	AT5G44390
chr5	17451800	17452599	250	38	7.85843e-112	6.31952	4.65235e-111	AT5G43420
chr3	1795400	1796199	445	68	6.16794e-196	6.28607	5.34743e-195	AT3G05980
chr1	26145200	26147799	1273	195	0	6.27078	0	AT1G69540
chr1	25145000	25145999	287	44	4.68449e-127	6.26552	2.98457e-126	AT1G67220
chr3	17872600	17874999	1187	182	0	6.2648	0	AT3G48260
chr2	12664200	12665999	763	117	0	6.26422	0	AT2G29620
chr2	855000	856399	922	142	0	6.23693	0	AT2G02950
chr1	5493200	5493799	175	27	3.68421e-78	6.2259	1.8131e-77	AT1G15990
chr5	25994800	25995999	291	45	7.24863e-128	6.21167	4.63902e-127	AT5G65070
chr1	27979600	27980399	278	43	2.9463e-122	6.21018	1.84544e-121	AT1G74440
chr4	2259400	2261799	1013	157	0	6.1978	0	AT4G04540
chr5	9974200	9978199	1993	309	0	6.19551	0	AT5G27940
chr5	9974200	9978199	1993	309	0	6.19551	0	AT5G27944
chr5	9974200	9978199	1993	309	0	6.19551	0	AT5G27945
chr2	19154400	19155599	986	153	0	6.19033	0	AT2G46660
chr3	22009000	22010399	386	60	6.16321e-168	6.17965	4.7842e-167	AT3G59580
chr5	927200	930799	1575	245	0	6.17508	0	AT5G03640
chr1	19214000	19217999	1688	263	0	6.16516	0	AT1G51800
chr5	23366000	23367399	969	151	0	6.16417	0	AT5G57685
chr1	29864800	29868999	1795	280	0	6.15793	0	AT1G79400
chr1	29864800	29868999	1795	280	0	6.15793	0	AT1G79410
chr1	6516600	6517199	173	27	1.43932e-76	6.15475	7.01249e-76	AT1G18870
chr5	25550000	25553399	1858	290	0	6.15426	0	AT5G63850
chr5	23279800	23281199	653	102	7.00301e-281	6.14952	8.53467e-280	AT5G57480
chr5	21118800	21121199	544	85	1.94504e-234	6.14763	1.98959e-233	AT5G52000
chr5	18742600	18747199	3251	508	0	6.14726	0	AT5G46230
chr5	18742600	18747199	3251	508	0	6.14726	0	AT5G46240
chr5	8323800	8324799	428	67	8.6883e-185	6.13616	7.23121e-184	AT5G24380
chr5	26946800	26949199	1933	303	0	6.12798	0	AT5G67550
chr3	6045200	6046599	529	83	2.95824e-227	6.12217	2.95166e-226	AT3G17690
chr1	19936200	19937599	427	67	5.34615e-184	6.12183	4.43226e-183	AT1G53430
chr3	21883800	21889199	2956	465	0	6.10632	0	AT3G59190
chr3	21883800	21889199	2956	465	0	6.10632	0	AT3G59200
chr5	22547600	22549799	800	126	0	6.09884	0	AT5G55680
chr5	22547600	22549799	800	126	0	6.09884	0	AT5G55690
chr3	18841000	18842599	438	69	4.99815e-188	6.09752	4.19265e-187	AT3G50700
chr1	21887800	21888599	412	65	8.08613e-177	6.08852	6.50168e-176	AT1G59590
chr1	1140400	1141399	475	75	2.88085e-203	6.0836	2.57076e-202	AT1G04260
chr4	17790200	17792399	1443	228	0	6.07938	0	AT4G37840
chr3	5671000	5672199	410	65	3.00766e-175	6.05897	2.39798e-174	AT3G16650
chr2	18280600	18285599	3044	483	0	6.05376	0	AT2G44210
chr2	18280600	18285599	3044	483	0	6.05376	0	AT2G44220
chr2	10495000	10496999	925	147	0	6.04439	0	AT2G24680
chr3	20198400	20199399	346	55	5.20486e-148	6.04284	3.63064e-147	AT3G54570
chr2	8083600	8085599	1018	162	0	6.03616	0	AT2G18640
chr1	220400	224399	2625	418	0	6.03227	0	AT1G01600
chr1	220400	224399	2625	418	0	6.03227	0	AT1G01610
chr1	11538000	11539799	533	85	8.5331e-226	6.02332	8.47449e-225	AT1G32080
chr5	18095800	18097599	677	108	6.60435e-286	6.02134	8.2371e-285	AT5G44820
chr4	11746800	11750999	2506	400	0	6.01796	0	AT4G22200
chr5	26757800	26761399	2592	414	0	6.01399	0	AT5G67040
chr5	26757800	26761399	2592	414	0	6.01399	0	AT5G67050
chr3	20780200	20780999	363	58	1.84296e-154	6.01183	1.32678e-153	AT3G55990
chr5	816000	816599	219	35	2.71654e-94	6.01041	1.46213e-93	AT5G03350
chr1	7849800	7850999	682	109	1.55057e-287	6.01016	1.9626e-286	AT1G22230
chr5	4822600	4823399	275	44	1.42872e-117	6.00355	8.68741e-117	AT5G14900
chr1	20780000	20783999	1642	263	0	5.99716	0	AT1G55610
chr1	26597400	26598599	387	62	4.17066e-164	5.9958	3.17394e-163	AT1G70550
chr5	21419000	21421599	2145	344	0	5.98959	0	AT5G52860
chr4	10183400	10185399	804	129	0	5.98679	0	AT4G18430
chr3	8565400	8566999	746	120	0	5.97153	0	AT3G23770
chr1	29352000	29352999	379	61	3.88519e-160	5.96812	2.8922e-159	AT1G78060
chr3	7105400	7106999	646	104	8.17381e-271	5.9666	9.52607e-270	AT3G20370
chr4	17671400	17671999	180	29	1.83206e-77	5.96214	8.95662e-77	AT4G37610
chr1	25524800	25527399	2005	324	0	5.94425	0	AT1G68110
chr1	25524800	25527399	2005	324	0	5.94425	0	AT1G68120
chr2	18509600	18510399	266	43	8.03104e-113	5.94212	4.78107e-112	AT2G44890
chr1	16415200	16418199	1823	295	0	5.93598	0	AT1G43600
chr3	3243200	3243999	278	45	1.1953e-117	5.93417	7.28367e-117	AT3G10430
chr2	8647800	8648599	284	46	4.61195e-120	5.93046	2.84076e-119	AT2G20030
chr4	2290000	2292199	870	141	0	5.92691	0	AT4G04570
chr5	22658200	22661199	2059	334	0	5.92158	0	AT5G55950
chr1	24970000	24971399	536	87	1.27483e-223	5.91798	1.2472e-222	AT1G66930
chr2	15944600	15946999	1071	174	0	5.91246	0	AT2G38090
chr1	19983200	19985799	805	131	0	5.90273	0	AT1G53550
chr1	19983200	19985799	805	131	0	5.90273	0	AT1G53560
chr5	8864400	8867599	1105	180	0	5.89682	0	AT5G25470
chr5	8864400	8867599	1105	180	0	5.89682	0	AT5G25460
chr4	10974600	10975199	184	30	2.51562e-78	5.89148	1.23979e-77	AT4G20320
chr4	11894600	11895599	245	40	2.9633e-103	5.88348	1.67306e-102	AT4G22590
chr4	11894600	11895599	245	40	2.9633e-103	5.88348	1.67306e-102	AT4G22592
chr3	1710400	1712199	893	146	0	5.87525	0	AT3G05770
chr3	16765200	16766199	544	89	2.33693e-225	5.87134	2.30478e-224	AT3G45670
chr1	24016600	24018599	635	104	2.61336e-262	5.86501	2.95684e-261	AT1G64625
chr5	24009200	24010599	665	109	2.27715e-274	5.86034	2.69063e-273	AT5G59590
chr4	2544400	2548199	1101	181	0	5.84301	0	AT4G04980
chr2	7390800	7392199	407	67	1.96936e-168	5.83509	1.53151e-167	AT2G17000
chr4	13818800	13820199	899	148	0	5.8348	0	AT4G27670
chr5	15416000	15417399	1014	167	0	5.83243	0	AT5G38500
chr4	13653600	13655199	807	133	0	5.82841	0	AT4G27260
chr1	23601400	23601999	188	31	3.36806e-79	5.82538	1.66567e-78	AT1G63650
chr5	834800	836999	1604	265	0	5.81415	0	AT5G03390
chr5	23342400	23342799	133	22	1.14895e-56	5.80707	4.92299e-56	AT5G57630
chr1	24392000	24393799	852	141	0	5.80428	0	AT1G65610
chr1	8580800	8585799	2157	357	0	5.80377	0	AT1G24220
chr1	8580800	8585799	2157	357	0	5.80377	0	AT1G24230
chr4	15340400	15342199	573	95	1.83465e-234	5.79374	1.87892e-233	AT4G31680
chr1	6192000	6193599	778	129	0	5.79319	0	AT1G17990
chr3	17223800	17225399	1188	197	0	5.79266	0	AT3G46770
chr2	15860600	15861399	385	64	3.96559e-158	5.77842	2.9064e-157	AT2G37880
chr4	10114800	10116199	397	66	5.90053e-163	5.77796	4.45464e-162	AT4G18290
chr2	11672200	11675599	1494	249	0	5.76341	0	AT2G27270
chr2	11672200	11675599	1494	249	0	5.76341	0	AT2G27280
chr2	12903800	12904999	408	68	5.08967e-167	5.76341	3.92941e-166	AT2G30250
chr5	5026200	5027199	402	67	1.31921e-164	5.76341	1.00484e-163	AT5G15480
chr4	13872600	13874599	736	123	3.36662e-298	5.74779	4.41856e-297	AT4G27850
chr4	13872600	13874599	736	123	3.36662e-298	5.74779	4.41856e-297	AT4G27852
chr4	13872600	13874599	736	123	3.36662e-298	5.74779	4.41856e-297	AT4G27860
chr1	5046000	5046799	424	71	9.74747e-173	5.73635	7.69248e-172	AT1G14686
chr5	16833200	16835199	1448	243	0	5.72388	0	AT5G42120
chr4	17055200	17056199	274	46	2.20727e-112	5.72164	1.30856e-111	AT4G36060
chr3	6810600	6818199	3949	664	0	5.71277	0	AT3G19600
chr3	6810600	6818199	3949	664	0	5.71277	0	AT3G19610
chr3	6810600	6818199	3949	664	0	5.71277	0	AT3G19615
chr3	6810600	6818199	3949	664	0	5.71277	0	AT3G19620
chr1	16565000	16566399	309	52	4.11382e-126	5.70799	2.61123e-125	AT1G43780
chr2	14035000	14038799	1580	266	0	5.70563	0	AT2G33090
chr2	14035000	14038799	1580	266	0	5.70563	0	AT2G33100
chr4	12160400	12170399	5612	950	0	5.67443	0	AT4G23240
chr4	12160400	12170399	5612	950	0	5.67443	0	AT4G23250
chr4	12160400	12170399	5612	950	0	5.67443	0	AT4G23260
chr5	513600	515399	685	116	1.70621e-274	5.67232	2.02443e-273	AT5G02400
chr1	5644800	5645199	183	31	2.21185e-75	5.67045	1.07212e-74	AT1G16510
chr5	24748200	24751399	861	146	0	5.66472	0	AT5G61550
chr5	5978600	5979999	454	77	1.13276e-182	5.66361	9.33681e-182	AT5G18065
chr1	24973600	24974799	477	81	1.43522e-191	5.65668	1.22194e-190	AT1G66940
chr1	7823200	7823999	418	71	3.40997e-168	5.65517	2.64941e-167	AT1G22160
chr4	7280200	7283999	2275	387	0	5.64675	0	AT4G12210
chr4	7280200	7283999	2275	387	0	5.64675	0	AT4G12220
chr4	994800	996799	911	155	0	5.64566	0	AT4G02280
chr1	1622600	1623399	282	48	3.48819e-114	5.64334	2.0868e-113	AT1G05490
chr1	12261600	12262399	323	55	2.48972e-130	5.64115	1.61274e-129	AT1G33800
chr1	6810000	6812199	628	107	1.589e-250	5.63772	1.73569e-249	AT1G19700
chr3	5653000	5656799	1954	333	0	5.63648	0	AT3G16600
chr3	5653000	5656799	1954	333	0	5.63648	0	AT3G16610
chr5	22535800	22537599	610	104	2.73589e-243	5.6341	2.90297e-242	AT5G55650
chr1	6489200	6491399	868	148	0	5.6336	0	AT1G18830
chr5	25800200	25800999	217	37	2.27222e-88	5.6336	1.18269e-87	AT5G64540
chr2	6866000	6866799	252	43	4.13999e-102	5.62937	2.32204e-101	AT2G15760
chr4	18120800	18123199	1029	176	0	5.61605	0	AT4G38820
chr4	18120800	18123199	1029	176	0	5.61605	0	AT4G38825
chr4	18120800	18123199	1029	176	0	5.61605	0	AT4G38830
chr3	6808800	6809599	304	52	2.4609e-122	5.61563	1.54367e-121	AT3G19595
chr2	12948000	12949399	455	78	2.53151e-181	5.60331	2.0706e-180	AT2G30380
chr3	18083800	18085199	519	89	2.33645e-206	5.60151	2.11595e-205	AT3G48770
chr3	17949400	17949999	338	58	2.57435e-135	5.59779	1.70115e-134	AT3G48460
chr1	28786400	28787399	431	74	1.13054e-171	5.59466	8.90546e-171	AT1G76705
chr5	25533000	25534999	891	153	0	5.59389	0	AT5G63800
chr2	7762200	7762999	547	94	6.41935e-217	5.58969	6.11199e-216	AT2G17860
chr1	20143200	20144999	1134	195	0	5.58607	0	AT1G53940
chr1	21337400	21338599	325	56	9.69988e-130	5.57472	6.26417e-129	AT1G57610
chr5	1772600	1773799	528	91	6.17654e-209	5.5734	5.6476e-208	AT5G05890
chr1	28377200	28378799	615	106	7.2685e-243	5.57311	7.69325e-242	AT1G75580
chr1	4773600	4774799	290	50	5.24032e-116	5.57129	3.14825e-115	AT1G13950
chr5	15306200	15306799	203	35	4.92271e-82	5.57129	2.47616e-81	AT5G38300
chr4	7156000	7157199	359	62	1.01061e-142	5.562	6.8479e-142	AT4G11910
chr5	16814000	16814599	214	37	4.0746e-86	5.55572	2.1016e-85	AT5G42040
chr5	23360800	23362599	925	160	0	5.55328	0	AT5G57670
chr2	14010800	14011999	474	82	3.12905e-187	5.55255	2.62219e-186	AT2G33010
chr4	16694200	16695599	711	123	2.25884e-279	5.55255	2.72562e-278	AT4G35070
chr3	6180800	6181799	468	81	8.0729e-185	5.54995	6.72557e-184	AT3G18050
chr1	4850400	4854999	1773	307	0	5.54751	0	AT1G14185
chr1	4850400	4854999	1773	307	0	5.54751	0	AT1G14190
chr1	4850400	4854999	1773	307	0	5.54751	0	AT1G14200
chr5	26017600	26018199	225	39	3.37071e-90	5.54174	1.77394e-89	AT5G65130
chr1	22334800	22336599	547	95	7.49622e-215	5.53085	7.04298e-214	AT1G60630
chr1	18833800	18834999	654	114	1.90132e-255	5.51063	2.10651e-254	AT1G50820
chr1	28247600	28249399	969	169	0	5.50763	0	AT1G75260
chr2	18872000	18873599	504	88	3.11009e-197	5.50143	2.70736e-196	AT2G45850
chr1	22361000	22363999	1028	180	0	5.48591	0	AT1G60740
chr1	22361000	22363999	1028	180	0	5.48591	0	AT1G60750
chr1	25029000	25029599	177	31	7.04649e-71	5.48453	3.32303e-70	AT1G67050
chr3	4803000	4803999	559	98	1.24852e-217	5.47916	1.19407e-216	AT3G14380
chr1	19305400	19306799	564	99	2.66996e-219	5.47233	2.57081e-218	AT1G51950
chr3	18365600	18366599	689	121	3.95242e-267	5.46968	4.5381e-266	AT3G49540
chr5	17523000	17525199	905	159	0	5.46738	0	AT5G43620
chr1	5489200	5489999	267	47	4.78156e-105	5.45684	2.72124e-104	AT1G15980
chr5	15596000	15598199	889	157	0	5.43914	0	AT5G38970
chr5	3321600	3322399	243	43	2.12587e-95	5.42832	1.15148e-94	AT5G10520
chr4	11309800	11314999	1531	271	0	5.42668	0	AT4G21213
chr4	11309800	11314999	1531	271	0	5.42668	0	AT4G21215
chr4	11309800	11314999	1531	271	0	5.42668	0	AT4G21216
chr5	23231400	23232999	412	73	1.3196e-159	5.42129	9.78914e-159	AT5G57350
chr1	29063400	29064599	474	84	3.66916e-183	5.42035	3.03016e-182	AT1G77330
chr1	22428600	22432399	2064	366	0	5.41697	0	AT1G60913
chr1	22428600	22432399	2064	366	0	5.41697	0	AT1G60930
chr1	22428600	22432399	2064	366	0	5.41697	0	AT1G60920
chr4	1046200	1046999	411	73	7.1752e-159	5.40813	5.28142e-158	AT4G02380
chr1	9259600	9260999	636	113	3.52206e-244	5.40638	3.7418e-243	AT1G26770
chr5	26021400	26022399	315	56	2.53968e-122	5.40319	1.59192e-121	AT5G65140
chr4	6491000	6492399	780	139	5.78153e-298	5.39024	7.56476e-297	AT4G10500
chr5	9226000	9227999	757	135	4.52996e-289	5.38629	5.75933e-288	AT5G26290
chr1	3710200	3713799	1250	223	0	5.38435	0	AT1G11110
chr1	3710200	3713799	1250	223	0	5.38435	0	AT1G11112
chr5	18029600	18032399	779	139	3.12128e-297	5.38333	4.07151e-296	AT5G44690
chr3	3974800	3977799	1244	222	0	5.38264	0	AT3G12540
chr3	3974800	3977799	1244	222	0	5.38264	0	AT3G12545
chr5	26885000	26887199	661	118	1.50043e-252	5.38081	1.64739e-251	AT5G67385
chr4	8708800	8711399	1215	217	0	5.37829	0	AT4G15248
chr4	8708800	8711399	1215	217	0	5.37829	0	AT4G15250
chr5	10796800	10797999	291	52	1.10497e-112	5.37548	6.57354e-112	AT5G28770
chr3	22907000	22907999	716	128	5.8803e-273	5.37318	6.90976e-272	AT3G61880
chr2	2287600	2289399	832	149	0	5.36371	0	AT2G05940
chr3	5187000	5187799	402	72	2.90642e-154	5.36317	2.08885e-153	AT3G15357
chr4	9496200	9499399	2010	360	0	5.36317	0	AT4G16880
chr1	4384400	4390799	2367	424	0	5.36241	0	AT1G12860
chr1	4384400	4390799	2367	424	0	5.36241	0	AT1G12870
chr1	4384400	4390799	2367	424	0	5.36241	0	AT1G12880
chr5	18060600	18062799	1194	214	0	5.35943	0	AT5G44760
chr1	25749200	25749799	273	49	1.86639e-105	5.35173	1.06503e-104	AT1G68570
chr3	2884800	2887599	1203	216	0	5.34983	0	AT3G09380
chr1	6398800	6399599	217	39	2.76275e-84	5.3447	1.40795e-83	AT1G18590
chr5	1786000	1786599	189	34	1.07525e-73	5.33963	5.14754e-73	AT5G05940
chr4	8128800	8129399	172	31	3.42011e-67	5.3296	1.57543e-66	AT4G14103
chr4	8128800	8129399	172	31	3.42011e-67	5.3296	1.57543e-66	AT4G14104
chr1	21046600	21048999	626	113	7.13538e-237	5.32138	7.39634e-236	AT1G56230
chr1	7534400	7534799	155	28	1.09275e-60	5.31743	4.82769e-60	AT1G21520
chr2	18365000	18366799	542	98	3.66628e-205	5.31253	3.31324e-204	AT2G44490
chr3	17721400	17724999	1453	263	0	5.30686	0	AT3G48010
chr3	17721400	17724999	1453	263	0	5.30686	0	AT3G48020
chr2	12289800	12290999	392	71	6.10333e-149	5.30342	4.29246e-148	AT2G28650
chr1	1380600	1383399	1935	351	0	5.29544	0	AT1G04890
chr4	780800	791799	8258	1499	0	5.29177	0	AT4G01820
chr4	780800	791799	8258	1499	0	5.29177	0	AT4G01830
chr5	15280800	15284999	1509	274	0	5.29013	0	AT5G38250
chr5	15280800	15284999	1509	274	0	5.29013	0	AT5G38260
chr4	17214800	17217399	1722	313	0	5.28466	0	AT4G36470
chr1	25815200	25817199	797	145	1.46552e-298	5.27981	1.9264e-297	AT1G68740
chr2	8086800	8088199	665	121	1.41525e-249	5.27915	1.53607e-248	AT2G18650
chr5	15965600	15966799	389	71	9.1201e-147	5.26283	6.33064e-146	AT5G39865
chr5	19792800	19794399	438	80	8.72811e-165	5.25911	6.66006e-164	AT5G48820
chr5	3978600	3979599	405	74	1.56405e-152	5.25716	1.11656e-151	AT5G12300
chr2	14835800	14840599	3417	625	0	5.25162	0	AT2G35208
chr2	14835800	14840599	3417	625	0	5.25162	0	AT2G35210
chr2	14835800	14840599	3417	625	0	5.25162	0	AT2G35215
chr5	26424400	26424999	246	45	1.21168e-93	5.2511	6.50526e-93	AT5G66080
chr5	23234200	23235199	322	59	1.56866e-121	5.24242	9.74672e-121	AT5G57350
chr1	470200	471399	371	68	1.48255e-139	5.24074	9.95874e-139	AT1G02350
chr3	4915400	4916999	469	86	1.35602e-175	5.23845	1.08317e-174	AT3G14620
chr1	19057400	19058199	289	53	2.85212e-109	5.23781	1.66997e-108	AT1G51405
chr5	23728600	23729799	545	100	1.85753e-203	5.23509	1.66281e-202	AT5G58750
chr4	16503800	16505399	414	76	3.57111e-155	5.23257	2.59058e-154	AT4G34550
chr4	16503800	16505399	414	76	3.57111e-155	5.23257	2.59058e-154	AT4G34555
chr4	12626800	12628199	418	77	3.89296e-156	5.21451	2.83369e-155	AT4G24420
chr1	9219200	9220199	434	80	6.66052e-162	5.21108	5.01508e-161	AT1G26680
chr1	27477600	27478599	552	102	1.15106e-204	5.19837	1.03692e-203	AT1G73050
chr5	7383800	7385399	606	112	2.32272e-224	5.19736	2.2776e-223	AT5G22310
chr3	2301800	2303999	779	144	1.61616e-287	5.1964	2.04259e-286	AT3G07250
chr1	5522600	5533399	3802	704	0	5.18761	0	AT1G16120
chr1	5522600	5533399	3802	704	0	5.18761	0	AT1G16130
chr1	5522600	5533399	3802	704	0	5.18761	0	AT1G16150
chr1	231200	231799	189	35	9.42379e-72	5.18707	4.46884e-71	AT1G01640
chr5	2221600	2223999	1080	200	0	5.18707	0	AT5G07170
chr3	3835600	3836799	350	65	3.40918e-130	5.17229	2.20498e-129	AT3G12040
chr3	8429000	8430199	425	79	2.3684e-157	5.16761	1.72987e-156	AT3G23510
chr3	19081400	19082399	371	69	1.1993e-137	5.16479	7.98691e-137	AT3G51410
chr1	2204200	2205399	661	123	7.09742e-243	5.16208	7.5215e-242	AT1G07180
chr3	2288800	2290199	773	144	3.15117e-283	5.15638	3.88477e-282	AT3G07195
chr2	16176800	16177799	488	91	1.04542e-179	5.15118	8.50999e-179	AT2G38690
chr3	14905800	14906799	370	69	6.21481e-137	5.15087	4.12917e-136	AT3G42800
chr3	3564000	3565799	1753	327	0	5.14947	0	AT3G11380
chr3	8581800	8583799	643	120	1.10403e-235	5.14704	1.14025e-234	AT3G23800
chr5	1770600	1771599	241	45	4.76255e-90	5.14437	2.50335e-89	AT5G05880
chr3	5541600	5546399	1899	355	0	5.13836	0	AT3G16340
chr5	26611800	26612599	230	43	5.82867e-86	5.13792	3.00087e-85	AT5G66670
chr1	10680600	10682599	508	95	1.90765e-186	5.13651	1.59238e-185	AT1G30320
chr5	551400	552599	433	81	2.70569e-159	5.13489	2.00019e-158	AT5G02490
chr4	1195800	1197599	652	122	2.43409e-238	5.13353	2.53854e-237	AT4G02710
chr1	6282400	6282799	128	24	7.01375e-49	5.12303	2.85878e-48	AT1G18265
chr2	14101600	14107999	4047	759	0	5.12176	0	AT2G33260
chr2	14101600	14107999	4047	759	0	5.12176	0	AT2G33270
chr2	14101600	14107999	4047	759	0	5.12176	0	AT2G33280
chr4	9991200	9994399	2472	464	0	5.11751	0	AT4G18010
chr5	5797400	5797999	165	31	3.88402e-62	5.1127	1.73117e-61	AT5G17590
chr3	11008600	11009599	356	67	1.03058e-130	5.10391	6.69093e-130	AT3G29020
chr5	6908600	6909399	276	52	7.38705e-102	5.0984	4.13782e-101	AT5G20440
chr3	17852000	17853599	589	111	4.02107e-214	5.09707	3.7655e-213	AT3G48220
chr1	2138600	2140799	1446	273	0	5.08784	0	AT1G06970
chr5	570000	570999	286	54	3.11404e-105	5.08745	1.77461e-104	AT5G02540
chr5	439200	442199	1106	209	0	5.0832	0	AT5G02210
chr5	439200	442199	1106	209	0	5.0832	0	AT5G02220
chr4	10890600	10894999	1655	313	0	5.07904	0	AT4G20160
chr1	3323000	3323399	148	28	1.21147e-55	5.07729	5.16237e-55	AT1G10140
chr2	19314000	19315199	428	81	9.57444e-156	5.07559	6.9633e-155	AT2G47000
chr3	22857800	22859599	778	148	2.4477e-279	5.04947	2.94934e-278	AT3G61750
chr5	4207000	4207999	441	84	2.14209e-159	5.04298	1.58492e-158	AT5G13200
chr4	10665400	10666999	482	92	1.33521e-173	5.03254	1.05763e-172	AT4G19570
chr5	15938200	15942399	2097	401	0	5.02322	0	AT5G39810
chr5	15938200	15942399	2097	401	0	5.02322	0	AT5G39820
chr4	13021800	13022799	1016	195	0	5.0048	0	AT4G25490
chr3	20811600	20812999	447	86	5.7983e-160	4.99272	4.31258e-159	AT3G56080
chr4	11502200	11503799	405	78	4.71625e-145	4.98756	3.23167e-144	AT4G21650
chr3	270600	272599	1094	211	0	4.98038	0	AT3G01750
chr3	21392600	21393599	362	70	1.92721e-129	4.96751	1.24365e-128	AT3G57740
chr5	23372000	23374599	769	149	3.19604e-271	4.95756	3.73499e-270	AT5G57690
chr4	15954200	15954599	129	25	9.6781e-48	4.95653	3.91855e-47	AT4G33070
chr4	17515600	17519999	1682	326	0	4.95606	0	AT4G37220
chr4	17515600	17519999	1682	326	0	4.95606	0	AT4G37225
chr4	17515600	17519999	1682	326	0	4.95606	0	AT4G37230
chr4	17515600	17519999	1682	326	0	4.95606	0	AT4G37235
chr4	18074800	18075799	340	66	2.74953e-121	4.94838	1.70591e-120	AT4G38690
chr5	19947800	19949199	937	182	0	4.94534	0	AT5G49200
chr2	13852400	13856399	2145	417	0	4.94105	0	AT2G32645
chr2	13852400	13856399	2145	417	0	4.94105	0	AT2G32660
chr2	19043800	19044599	221	43	1.30401e-79	4.93687	6.47149e-79	AT2G46400
chr3	7080400	7081999	606	118	2.60525e-213	4.93309	2.43433e-212	AT3G20300
chr1	19209200	19211799	1112	217	0	4.92236	0	AT1G51790
chr5	23578000	23578799	251	49	9.23353e-90	4.92046	4.8415e-89	AT5G58320
chr2	7723200	7723799	210	41	1.5689e-75	4.91998	7.60904e-75	AT2G17770
chr3	6020000	6021199	604	118	6.35573e-212	4.9168	5.88716e-211	AT3G17600
chr2	19229400	19230199	225	44	1.31547e-80	4.91199	6.57811e-80	AT2G46780
chr1	29467400	29468599	644	126	1.94763e-225	4.90957	1.92306e-224	AT1G78320
chr5	14834200	14836199	1180	231	0	4.9068	0	AT5G37400
chr4	10259600	10265599	2976	585	0	4.88658	0	AT4G18640
chr4	10259600	10265599	2976	585	0	4.88658	0	AT4G18650
chr1	5453400	5454399	269	53	3.84215e-95	4.87533	2.07714e-94	AT1G15850
chr3	22242600	22242999	137	27	9.77177e-50	4.87399	4.00784e-49	AT3G60180
chr4	16348400	16349799	558	110	2.92226e-194	4.8727	2.51309e-193	AT4G34138
chr4	18288800	18289799	639	126	5.52338e-222	4.87145	5.36674e-221	AT4G39320
chr1	27082600	27083599	562	111	2.91495e-195	4.86342	2.52205e-194	AT1G71960
chr3	3745800	3749799	1326	262	0	4.8615	0	AT3G11860
chr3	3745800	3749799	1326	262	0	4.8615	0	AT3G11870
chr2	6357600	6358799	420	83	1.46128e-146	4.8607	1.01269e-145	AT2G14810
chr4	16749200	16749999	268	53	1.88191e-94	4.85721	1.01419e-93	AT4G35200
chr1	10214800	10216199	904	179	1.60786045982e-311	4.85114	2.17724723536e-310	AT1G29230
chr1	29018200	29019399	303	60	2.7092e-106	4.85087	1.55637e-105	AT1G77230
chr1	29018200	29019399	303	60	2.7092e-106	4.85087	1.55637e-105	AT1G77240
chr4	14256800	14257799	419	83	7.1241e-146	4.84913	4.90522e-145	AT4G28890
chr1	27034000	27035199	1014	201	0	4.84585	0	AT1G71870
chr4	286000	289399	1472	292	0	4.84231	0	AT4G00700
chr3	22716400	22717599	383	76	2.36983e-133	4.84076	1.55396e-132	AT3G61390
chr1	205200	205799	176	35	1.32794e-62	4.83028	5.94678e-62	AT1G01570
chr4	11498800	11499999	387	77	2.34521e-134	4.82779	1.54256e-133	AT4G21640
chr2	19058200	19064799	3557	708	0	4.8259	0	AT2G46430
chr2	19058200	19064799	3557	708	0	4.8259	0	AT2G46440
chr4	15343400	15345199	864	172	2.87739e-296	4.82518	3.74193e-295	AT4G31690
chr5	18793000	18795399	657	131	1.2547e-225	4.8175	1.24463e-224	AT5G46330
chr1	5438800	5439999	346	69	3.83506e-120	4.81676	2.36394e-119	AT1G15790
chr1	7252000	7254999	2713	542	0	4.80816	0	AT1G20850
chr1	7252000	7254999	2713	542	0	4.80816	0	AT1G20860
chr1	4915800	4916599	305	61	6.30541e-106	4.80284	3.61016e-105	AT1G14370
chr3	3511000	3513199	1110	222	0	4.80284	0	AT3G11210
chr5	989200	990399	460	92	2.39295e-158	4.80284	1.75531e-157	AT5G03760
chr5	14761200	14761999	809	162	5.87628e-276	4.79691	7.01126e-275	AT5G37280
chr1	6202400	6203999	799	160	1.4063e-272	4.79684	1.65023e-271	AT1G18020
chr5	2084000	2085799	794	159	6.87984e-271	4.7968	8.02898e-270	AT5G06740
chr5	21755600	21758799	898	180	1.09988e-305	4.79217	1.47532e-304	AT5G53550
chr1	19600800	19601999	823	165	2.41178e-280	4.7912	2.92672e-279	AT1G52615
chr5	23738200	23741399	3130	628	0	4.78754	0	AT5G58782
chr5	23738200	23741399	3130	628	0	4.78754	0	AT5G58784
chr3	7906800	7907999	483	97	1.95515e-165	4.78303	1.49725e-164	AT3G22370
chr4	14867000	14868599	722	145	7.14902e-246	4.78296	7.67148e-245	AT4G30400
chr2	7918000	7919399	647	130	1.5849e-220	4.78067	1.53123e-219	AT2G18193
chr3	5633400	5634399	487	98	1.91275e-166	4.77343	1.47271e-165	AT3G16555
chr1	10985000	10986199	636	128	1.81953e-216	4.77282	1.72471e-215	AT1G30850
chr5	8584600	8585199	447	90	6.38559e-153	4.77082	4.57009e-152	AT5G24920
chr4	8470400	8471799	466	94	5.28596e-159	4.76196	3.90429e-158	AT4G14750
chr1	26704600	26707199	1120	226	0	4.76034	0	AT1G70810
chr1	26704600	26707199	1120	226	0	4.76034	0	AT1G70820
chr1	7207800	7208999	381	77	2.91267e-130	4.75294	1.88528e-129	AT1G20750
chr4	18537800	18538399	183	37	6.14701e-64	4.75092	2.78493e-63	AT4G39970
chr4	8502800	8503199	168	34	7.4373e-59	4.74633	3.25039e-58	AT4G14805
chr2	11730000	11730799	385	78	2.83027e-131	4.74126	1.84454e-130	AT2G27430
chr5	24045000	24050999	2137	433	0	4.74072	0	AT5G59670
chr5	24045000	24050999	2137	433	0	4.74072	0	AT5G59680
chr4	15127400	15128199	222	45	8.34009e-77	4.7388	4.06567e-76	AT4G31110
chr3	16343400	16346199	823	167	6.18129e-277	4.73382	7.39588e-276	AT3G44800
chr5	4828800	4830599	660	134	1.54806e-222	4.73115	1.50759e-221	AT5G14930
chr2	15650200	15651199	369	75	1.59102e-125	4.72599	1.0069e-124	AT2G37280
chr5	22324200	22326399	1259	256	0	4.72404	0	AT5G55020
chr5	16490600	16491199	177	36	1.45364e-61	4.72279	6.46561e-61	AT5G41200
chr5	22192000	22195999	2298	468	0	4.71663	0	AT5G54630
chr5	24636600	24641399	1770	361	0	4.70971	0	AT5G61260
chr5	24636600	24641399	1770	361	0	4.70971	0	AT5G61270
chr3	8415400	8417999	828	169	6.12431e-277	4.70621	7.33799e-276	AT3G23470
chr5	18133400	18136399	1185	242	0	4.70361	0	AT5G44900
chr4	18163800	18165799	807	165	1.64624e-269	4.69805	1.91075e-268	AT4G38970
chr3	5764000	5764599	171	35	3.41839e-59	4.69306	1.49704e-58	AT3G16870
chr5	13590200	13591199	327	67	1.20045e-110	4.68814	7.08233e-110	AT5G35370
chr1	10041800	10044199	805	165	3.64045e-268	4.68641	4.19685e-267	AT1G28570
chr4	756400	758399	692	142	1.16122e-230	4.68108	1.17513e-229	AT4G01750
chr5	21237000	21239399	1890	388	0	4.67905	0	AT5G52300
chr5	24041600	24043399	526	108	6.5415e-176	4.67832	5.23504e-175	AT5G59670
chr2	14469000	14471599	862	177	2.03876e-286	4.67802	2.55024e-285	AT2G34270
chr2	14469000	14471599	862	177	2.03876e-286	4.67802	2.55024e-285	AT2G34280
chr5	585600	586799	482	99	2.24485e-161	4.6767	1.68284e-160	AT5G02600
chr4	12171200	12191799	12361	2541	0	4.6728	0	AT4G23271
chr4	12171200	12191799	12361	2541	0	4.6728	0	AT4G23280
chr4	12171200	12191799	12361	2541	0	4.6728	0	AT4G23290
chr4	12171200	12191799	12361	2541	0	4.6728	0	AT4G23300
chr4	12171200	12191799	12361	2541	0	4.6728	0	AT4G23310
chr4	12171200	12191799	12361	2541	0	4.6728	0	AT4G23270
chr4	12171200	12191799	12361	2541	0	4.6728	0	AT4G23320
chr1	23449400	23450199	243	50	1.44916e-82	4.66836	7.31957e-82	AT1G63220
chr2	11280200	11284199	2553	526	0	4.66222	0	AT2G26520
chr2	11280200	11284199	2553	526	0	4.66222	0	AT2G26530
chr2	17796400	17797199	411	85	4.76783e-137	4.64463	3.17026e-136	AT2G42760
chr2	16201000	16202199	522	108	3.12808e-173	4.64274	2.47548e-172	AT2G38760
chr3	22279600	22280799	744	154	1.43042e-245	4.64067	1.53111e-244	AT3G60280
chr4	14819400	14820599	971	201	0	4.64035	0	AT4G30270
chr2	12242000	12242399	169	35	7.59655e-58	4.63817	3.27967e-57	AT2G28570
chr5	21650000	21651399	613	127	1.19392e-202	4.63644	1.0643e-201	AT5G53370
chr1	10879600	10880399	246	51	6.46637e-83	4.63333	3.27386e-82	AT1G30670
chr3	832200	833999	467	97	1.19088e-154	4.62459	8.60234e-154	AT3G03500
chr5	8032800	8033399	178	37	1.45799e-60	4.62111	6.43795e-60	AT5G23820
chr4	17093200	17093999	245	51	3.01157e-82	4.61449	1.51663e-81	AT4G36120
chr3	9593400	9595199	975	203	0	4.61356	0	AT3G26210
chr4	14482600	14484199	504	105	3.65145e-166	4.61073	2.80383e-165	AT4G29450
chr4	14482600	14484199	504	105	3.65145e-166	4.61073	2.80383e-165	AT4G29460
chr1	1435400	1436999	657	137	1.54397e-215	4.60652	1.46027e-214	AT1G05020
chr1	27789200	27790399	537	112	1.18116e-176	4.60558	9.48819e-176	AT1G73910
chr2	12432800	12433399	244	51	1.39691e-81	4.59566	6.99766e-81	AT2G28950
chr2	16258400	16260199	1492	312	0	4.59348	0	AT2G38940
chr4	1064200	1066399	1946	407	0	4.59279	0	AT4G02420
chr4	17375400	17376199	306	64	1.46287e-101	4.59271	8.18344e-101	AT4G36880
chr5	24188600	24197799	6483	1356	0	4.59245	0	AT5G60060
chr5	24188600	24197799	6483	1356	0	4.59245	0	AT5G60070
chr5	24188600	24197799	6483	1356	0	4.59245	0	AT5G60080
chr5	24188600	24197799	6483	1356	0	4.59245	0	AT5G60090
chr1	7812800	7815599	1391	291	0	4.59158	0	AT1G22130
chr1	7812800	7815599	1391	291	0	4.59158	0	AT1G22140
chr5	5816800	5818999	1217	255	0	4.58436	0	AT5G17650
chr5	5816800	5818999	1217	255	0	4.58436	0	AT5G17660
chr5	505400	507199	520	109	2.91422e-170	4.58253	2.28084e-169	AT5G02370
chr5	505400	507199	520	109	2.91422e-170	4.58253	2.28084e-169	AT5G02380
chr1	29836600	29839599	873	183	6.9731e-284	4.58238	8.62138e-283	AT1G79320
chr1	29836600	29839599	873	183	6.9731e-284	4.58238	8.62138e-283	AT1G79330
chr3	20112400	20113199	267	56	1.05071e-88	4.57985	5.48903e-88	AT3G54310
chr1	28094400	28094999	205	43	1.02316e-68	4.57945	4.77231e-68	AT1G74770
chr1	561000	562599	724	152	1.50318e-235	4.57534	1.54874e-234	AT1G02630
chr3	16631800	16634399	846	178	3.98868e-274	4.5654	4.70643e-273	AT3G45320
chr3	16631800	16634399	846	178	3.98868e-274	4.5654	4.70643e-273	AT3G45330
chr5	3626200	3629799	1752	369	0	4.56074	0	AT5G11360
chr5	3626200	3629799	1752	369	0	4.56074	0	AT5G11370
chr4	11394600	11397599	1057	223	0	4.55301	0	AT4G21390
chr1	1636400	1637999	2051	433	0	4.54994	0	AT1G05530
chr4	10813600	10814999	373	79	1.32841e-121	4.53534	8.25998e-121	AT4G19960
chr4	12837200	12839999	2091	443	0	4.53397	0	AT4G24972
chr2	13958200	13958999	712	151	3.01276e-229	4.5293	3.03088e-228	AT2G32905
chr4	13236600	13236999	132	28	1.17559e-44	4.52839	4.64734e-44	AT4G26120
chr2	11778200	11779799	650	138	2.68668e-209	4.52441	2.45923e-208	AT2G27590
chr1	18835800	18838799	1502	319	0	4.5228	0	AT1G50830
chr3	17756400	17757399	353	75	7.49455e-115	4.52107	4.48673e-114	AT3G48090
chr3	4059600	4060599	362	77	1.43418e-117	4.51592	8.71439e-117	AT3G12775
chr5	1216200	1217199	771	164	3.1615e-247	4.51584	3.41402e-246	AT5G04340
chr3	18620400	18622399	1556	331	0	4.51554	0	AT3G50230
chr1	24848400	24851999	1245	265	0	4.51286	0	AT1G66600
chr1	24848400	24851999	1245	265	0	4.51286	0	AT1G66610
chr2	14458800	14460599	676	144	8.65266e-217	4.50933	8.22003e-216	AT2G34238
chr2	14458800	14460599	676	144	8.65266e-217	4.50933	8.22003e-216	AT2G34240
chr1	8706800	8711799	2018	430	0	4.50797	0	AT1G24570
chr1	8706800	8711799	2018	430	0	4.50797	0	AT1G24575
chr1	8706800	8711799	2018	430	0	4.50797	0	AT1G24580
chr3	2753200	2754399	459	98	9.50515e-148	4.49899	6.62487e-147	AT3G09020
chr4	10564000	10565599	674	144	1.76352e-215	4.49599	1.66607e-214	AT4G19360
chr5	853400	856199	1970	421	0	4.49482	0	AT5G03435
chr1	3025000	3025399	159	34	7.83661e-53	4.49207	3.27396e-52	AT1G09370
chr1	2434000	2436799	1061	227	0	4.4897	0	AT1G07880
chr1	2434000	2436799	1061	227	0	4.4897	0	AT1G07885
chr4	12142800	12151599	3463	741	0	4.48913	0	AT4G23190
chr4	12142800	12151599	3463	741	0	4.48913	0	AT4G23200
chr4	12142800	12151599	3463	741	0	4.48913	0	AT4G23205
chr4	12142800	12151599	3463	741	0	4.48913	0	AT4G23210
chr5	1468800	1470599	821	176	6.57641e-261	4.48083	7.42108e-260	AT5G04980
chr5	3882200	3883199	531	114	1.71152e-169	4.47422	1.33709e-168	AT5G12020
chr1	6998800	6999799	475	102	7.05376e-152	4.47323	5.02301e-151	AT1G20190
chr4	6966200	6973399	2645	568	0	4.47307	0	AT4G11460
chr4	6966200	6973399	2645	568	0	4.47307	0	AT4G11470
chr4	6966200	6973399	2645	568	0	4.47307	0	AT4G11480
chr3	5596800	5597799	330	71	3.86897e-106	4.46461	2.21816e-105	AT3G16470
chr1	1062400	1063999	664	143	1.55775e-210	4.46026	1.43357e-209	AT1G04110
chr1	4628000	4634999	2238	482	0	4.46006	0	AT1G13500
chr1	4628000	4634999	2238	482	0	4.46006	0	AT1G13510
chr1	4628000	4634999	2238	482	0	4.46006	0	AT1G13520
chr1	4628000	4634999	2238	482	0	4.46006	0	AT1G13530
chr1	20193000	20193799	315	68	4.42749e-101	4.44969	2.46708e-100	AT1G54095
chr3	7021600	7022999	463	100	3.3159e-147	4.44743	2.30734e-146	AT3G20110
chr5	7053200	7053999	296	64	5.49253e-95	4.44263	2.96562e-94	AT5G20830
chr1	26901000	26901799	277	60	6.82362e-89	4.43462	3.57569e-88	AT1G71380
chr2	478600	483999	2243	486	0	4.43324	0	AT2G02020
chr2	478600	483999	2243	486	0	4.43324	0	AT2G02023
chr2	478600	483999	2243	486	0	4.43324	0	AT2G02026
chr2	478600	483999	2243	486	0	4.43324	0	AT2G02030
chr4	13910000	13910799	359	78	4.88358e-114	4.42107	2.91954e-113	AT4G27950
chr5	21020400	21022999	759	165	7.64285e-238	4.41861	7.93202e-237	AT5G51750
chr1	22499600	22500599	492	107	4.18532e-155	4.41682	3.03356e-154	AT1G61090
chr1	26161600	26163799	1263	275	0	4.41163	0	AT1G69570
chr1	26161600	26163799	1263	275	0	4.41163	0	AT1G69572
chr1	1250200	1256799	2388	520	0	4.41122	0	AT1G04580
chr3	6601400	6603599	693	151	7.13552e-217	4.40843	6.7863e-216	AT3G19090
chr3	19023400	19024399	426	93	4.01138e-134	4.40002	2.63442e-133	AT3G51230
chr1	1797000	1800599	2050	448	0	4.39546	0	AT1G05920
chr1	1797000	1800599	2050	448	0	4.39546	0	AT1G05925
chr1	1797000	1800599	2050	448	0	4.39546	0	AT1G05930
chr5	21096200	21099799	2528	553	0	4.39117	0	AT5G51920
chr1	16140600	16141599	370	81	1.66461e-116	4.38778	1.00217e-115	AT1G43000
chr3	21982800	21983999	634	139	2.46187e-197	4.38129	2.14527e-196	AT3G59480
chr5	24739400	24741399	1561	343	0	4.37156	0	AT5G61520
chr3	19557200	19559399	1297	285	0	4.37143	0	AT3G52770
chr3	1733200	1735799	887	195	4.01725e-274	4.36935	4.73359e-273	AT3G05820
chr4	7278000	7279399	1346	296	0	4.36799	0	AT4G12190
chr3	21899400	21908399	7944	1747	0	4.36792	0	AT3G59240
chr3	21899400	21908399	7944	1747	0	4.36792	0	AT3G59250
chr3	21899400	21908399	7944	1747	0	4.36792	0	AT3G59260
chr3	21899400	21908399	7944	1747	0	4.36792	0	AT3G59270
chr4	15317400	15330199	9170	2018	0	4.36492	0	AT4G31615
chr4	15317400	15330199	9170	2018	0	4.36492	0	AT4G31620
chr4	15317400	15330199	9170	2018	0	4.36492	0	AT4G31630
chr4	15317400	15330199	9170	2018	0	4.36492	0	AT4G31640
chr4	15317400	15330199	9170	2018	0	4.36492	0	AT4G31610
chr5	18529200	18530199	318	70	6.35301e-100	4.36372	3.51476e-99	AT5G45670
chr1	7263000	7265399	644	142	3.60405e-199	4.35638	3.17626e-198	AT1G20880
chr5	6470200	6472799	1256	277	0	4.3555	0	AT5G19240
chr5	6470200	6472799	1256	277	0	4.3555	0	AT5G19250
chr1	8414200	8414799	199	44	3.21206e-63	4.34439	1.44526e-62	AT1G23800
chr2	7272800	7274599	520	115	7.6355e-161	4.34344	5.70889e-160	AT2G16750
chr1	24516400	24518599	510	113	1.7488e-157	4.33531	1.27841e-156	AT1G65900
chr1	1128800	1129399	185	41	8.28337e-59	4.33427	3.61645e-58	AT1G04240
chr1	9157200	9158999	460	102	3.37833e-142	4.33197	2.28553e-141	AT1G26480
chr1	9157200	9158999	460	102	3.37833e-142	4.33197	2.28553e-141	AT1G26490
chr1	9157200	9158999	460	102	3.37833e-142	4.33197	2.28553e-141	AT1G26500
chr5	822000	823399	333	74	1.89366e-103	4.32255	1.07056e-102	AT5G03360
chr5	1602400	1603199	207	46	2.635e-65	4.32255	1.20017e-64	AT5G05410
chr1	24555800	24557999	517	115	6.26733e-159	4.31838	4.62514e-158	AT1G65960
chr1	24555800	24557999	517	115	6.26733e-159	4.31838	4.62514e-158	AT1G65970
chr4	16751000	16752199	534	119	9.80742e-164	4.31045	7.43708e-163	AT4G35210
chr5	23425000	23425599	278	62	1.80547e-86	4.30706	9.3179e-86	AT5G57810
chr1	6301800	6304199	2240	500	0	4.30334	0	AT1G18310
chr1	19535200	19535999	273	61	8.65054e-85	4.29893	4.42698e-84	AT1G52430
chr5	22435600	22436799	904	202	2.15331e-274	4.29878	2.54784e-273	AT5G55320
chr1	23210400	23211399	340	76	6.72693e-105	4.29728	3.82328e-104	AT1G62690
chr2	12887600	12890199	2826	632	0	4.2952	0	AT2G30210
chr5	21914000	21915199	313	70	9.94111e-97	4.29511	5.4121e-96	AT5G53980
chr4	418400	420999	1149	257	0	4.29452	0	AT4G00970
chr5	26216200	26217599	357	80	1.04008e-109	4.28653	6.11502e-109	AT5G65600
chr1	4459000	4460799	1507	338	0	4.28277	0	AT1G13080
chr1	2286200	2291199	3350	752	0	4.27912	0	AT1G07440
chr1	2286200	2291199	3350	752	0	4.27912	0	AT1G07450
chr1	2286200	2291199	3350	752	0	4.27912	0	AT1G07460
chr5	6289400	6295599	2962	665	0	4.2785	0	AT5G18860
chr3	1893000	1895199	1461	329	0	4.26562	0	AT3G06260
chr1	22897800	22900799	746	168	5.34941e-225	4.26538	5.26365e-224	AT1G61940
chr1	22897800	22900799	746	168	5.34941e-225	4.26538	5.26365e-224	AT1G61950
chr2	8928000	8930399	1483	334	0	4.26504	0	AT2G20720
chr1	28252000	28253399	537	121	1.18077e-162	4.26302	8.90641e-162	AT1G75280
chr3	8589000	8589799	284	64	2.73216e-87	4.26252	1.41432e-86	AT3G23810
chr3	1010800	1013599	1545	349	0	4.25237	0	AT3G03930
chr2	11526000	11527599	757	171	1.67825e-227	4.25234	1.67649e-226	AT2G27010
chr4	16522000	16522799	208	47	1.9186e-64	4.25102	8.71542e-64	AT4G34588
chr4	16522000	16522799	208	47	1.9186e-64	4.25102	8.71542e-64	AT4G34590
chr4	16660600	16663999	2106	476	0	4.24991	0	AT4G34990
chr2	13569600	13570399	221	50	3.23473e-68	4.24571	1.50139e-67	AT2G31900
chr3	3556600	3558599	1131	256	0	4.24376	0	AT3G11340
chr3	3556600	3558599	1131	256	0	4.24376	0	AT3G11350
chr4	7233800	7234199	128	29	1.61954e-40	4.23975	6.22918e-40	AT4G12070
chr5	26003600	26008799	3798	862	0	4.23229	0	AT5G65090
chr5	26003600	26008799	3798	862	0	4.23229	0	AT5G65100
chr2	13916600	13917799	392	89	1.73482e-118	4.23082	1.0594e-117	AT2G32800
chr2	10736400	10737799	991	225	2.94875e-295	4.23077	3.81727e-294	AT2G25200
chr1	240000	248599	6314	1435	0	4.2265	0	AT1G01660
chr1	240000	248599	6314	1435	0	4.2265	0	AT1G01680
chr1	240000	248599	6314	1435	0	4.2265	0	AT1G01670
chr4	16346000	16346999	418	95	5.04942e-126	4.2265	3.20272e-125	AT4G34135
chr4	18035400	18040599	2054	467	0	4.22485	0	AT4G38580
chr4	18035400	18040599	2054	467	0	4.22485	0	AT4G38590
chr4	958000	958599	409	93	2.65744e-123	4.22443	1.67064e-122	AT4G02170
chr1	21711000	21712999	963	219	1.78536e-286	4.22387	2.23984e-285	AT1G58430
chr3	245800	255399	7238	1647	0	4.22137	0	AT3G01670
chr3	245800	255399	7238	1647	0	4.22137	0	AT3G01680
chr3	245800	255399	7238	1647	0	4.22137	0	AT3G01660
chr4	13161400	13162999	558	127	4.84155e-167	4.22045	3.74124e-166	AT4G25900
chr3	9209000	9209999	448	102	1.32132e-134	4.21896	8.71113e-134	AT3G25290
chr3	16825000	16826199	1023	233	1.26635e-303	4.21743	1.688e-302	AT3G45790
chr5	23994400	23997599	1364	311	0	4.21291	0	AT5G59530
chr5	23994400	23997599	1364	311	0	4.21291	0	AT5G59540
chr3	9709200	9709999	307	70	6.09903e-93	4.21278	3.25396e-92	AT3G26500
chr1	3679200	3681199	1989	454	0	4.2083	0	AT1G11040
chr3	19168800	19170799	1015	232	4.45862e-300	4.20248	5.8789e-299	AT3G51670
chr2	8005200	8008599	1932	442	0	4.19868	0	AT2G18470
chr1	22733400	22735399	559	128	3.26787e-166	4.19498	2.51381e-165	AT1G61610
chr2	13799200	13799999	292	67	6.42523e-88	4.18635	3.33011e-87	AT2G32510
chr4	2714600	2715999	954	219	7.45028e-281	4.18439	9.06681e-280	AT4G05310
chr4	17204600	17205999	649	149	5.91365e-192	4.18395	5.04494e-191	AT4G36430
chr5	22662600	22664599	701	161	5.0973e-207	4.18235	4.64088e-206	AT5G55960
chr2	13542600	13546199	892	205	1.87072e-262	4.17964	2.11941e-261	AT2G31862
chr5	17937000	17943399	2834	652	0	4.17523	0	AT5G44540
chr5	17937000	17943399	2834	652	0	4.17523	0	AT5G44550
chr5	17937000	17943399	2834	652	0	4.17523	0	AT5G44530
chr4	15273800	15275199	791	182	9.30976e-233	4.17478	9.48884e-232	AT4G31500
chr3	1373800	1375799	834	192	4.21125e-245	4.17247	4.50203e-244	AT3G04960
chr1	21439600	21440599	486	112	7.77437e-144	4.16818	5.28471e-143	AT1G57980
chr1	28275000	28275799	282	65	1.42494e-84	4.16739	7.2813e-84	AT1G75360
chr2	15299600	15300599	282	65	1.42494e-84	4.16739	7.2813e-84	AT2G36470
chr3	7044800	7046999	939	217	2.06691e-274	4.15656	2.449e-273	AT3G20190
chr4	14627000	14627599	173	40	1.05569e-52	4.15446	4.39966e-52	AT4G29905
chr2	16541000	16545799	2223	514	0	4.15436	0	AT2G39690
chr2	16541000	16545799	2223	514	0	4.15436	0	AT2G39700
chr2	8184000	8184599	268	62	3.53156e-80	4.15213	1.7598e-79	AT2G18890
chr2	16441400	16445399	2061	477	0	4.15038	0	AT2G39370
chr4	17617000	17618399	380	88	1.91002e-112	4.14791	1.13313e-111	AT4G37470
chr1	28127000	28132999	1999	463	0	4.14725	0	AT1G74870
chr1	28127000	28132999	1999	463	0	4.14725	0	AT1G74875
chr1	28127000	28132999	1999	463	0	4.14725	0	AT1G74880
chr1	28127000	28132999	1999	463	0	4.14725	0	AT1G74890
chr3	3387400	3388399	272	63	3.14377e-81	4.14721	1.57391e-80	AT3G10820
chr5	7182000	7183999	582	135	1.90815e-170	4.14111	1.50031e-169	AT5G21120
chr1	10633000	10635399	599	139	2.91269e-175	4.13943	2.32443e-174	AT1G30220
chr3	10589400	10590599	461	107	1.72837e-135	4.13852	1.14389e-134	AT3G28340
chr1	21441800	21442999	573	133	9.95439e-168	4.13839	7.71307e-167	AT1G57990
chr4	15943800	15947799	2098	487	0	4.13813	0	AT4G33050
chr4	7635600	7637799	659	153	1.99163e-192	4.13735	1.70246e-191	AT4G13100
chr4	16491600	16493199	646	150	1.16296e-188	4.13685	9.78425e-188	AT4G34510
chr2	1331800	1332799	766	178	5.48878e-223	4.13368	5.36367e-222	AT2G04038
chr2	8154200	8156399	559	130	2.41451e-163	4.13044	1.82446e-162	AT2G18830
chr2	15832000	15838399	3670	854	0	4.12797	0	AT2G37760
chr2	15832000	15838399	3670	854	0	4.12797	0	AT2G37770
chr2	15832000	15838399	3670	854	0	4.12797	0	AT2G37780
chr4	1256000	1256799	721	168	2.08947e-209	4.12244	1.91463e-208	AT4G02810
chr2	16743200	16743799	210	49	8.59854e-63	4.11672	3.85668e-62	AT2G40095
chr5	22357400	22357999	180	42	3.46609e-54	4.11672	1.46237e-53	AT5G55090
chr5	24699600	24702799	1080	252	9.49667665607e-312	4.11672	1.28801508033e-310	AT5G61430
chr3	22902600	22903599	458	107	1.22763e-133	4.11159	8.05606e-133	AT3G61870
chr2	18773600	18778599	4373	1023	0	4.10612	0	AT2G45550
chr2	18773600	18778599	4373	1023	0	4.10612	0	AT2G45560
chr2	14744200	14745999	470	110	8.64044e-137	4.10424	5.73631e-136	AT2G34960
chr5	2958400	2960799	674	158	1.34184e-194	4.09761	1.15746e-193	AT5G09520
chr5	2958400	2960799	674	158	1.34184e-194	4.09761	1.15746e-193	AT5G09530
chr1	8424600	8425199	179	42	1.43731e-53	4.09385	6.03728e-53	AT1G23840
chr1	9251000	9251599	200	47	1.87902e-59	4.08752	8.23738e-59	AT1G26761
chr2	7683000	7683399	136	32	3.55527e-41	4.08241	1.37364e-40	AT2G17690
chr1	16424600	16425199	314	74	1.4534e-91	4.07592	7.69642e-91	AT1G43610
chr4	8849800	8850599	280	66	6.44465e-82	4.07514	3.23598e-81	AT4G15480
chr3	2837200	2838199	369	87	4.41113e-107	4.07413	2.54266e-106	AT3G09240
chr4	434600	437199	704	166	8.80036e-202	4.07373	7.83673e-201	AT4G01010
chr1	1707600	1708599	233	55	1.70687e-68	4.06931	7.94833e-68	AT1G05690
chr1	3378200	3379199	305	72	7.58661e-89	4.06907	3.9682e-88	AT1G10300
chr4	13981600	13983599	715	169	2.51669e-204	4.06394	2.26476e-203	AT4G28170
chr4	13981600	13983599	715	169	2.51669e-204	4.06394	2.26476e-203	AT4G28180
chr3	23216000	23218399	1061	251	1.63212e-301	4.06041	2.1587e-300	AT3G62760
chr3	23216000	23218399	1061	251	1.63212e-301	4.06041	2.1587e-300	AT3G62750
chr5	18137400	18139399	612	145	8.12762e-175	4.05426	6.46798e-174	AT5G44910
chr5	18137400	18139399	612	145	8.12762e-175	4.05426	6.46798e-174	AT5G44920
chr5	18137400	18139399	612	145	8.12762e-175	4.05426	6.46798e-174	AT5G44930
chr2	17282800	17283599	253	60	9.20824e-74	4.05039	4.41571e-73	AT2G41451
chr1	26473400	26474199	219	52	4.1433e-64	4.04547	1.88113e-63	AT1G70290
chr5	24835000	24836399	425	101	8.11568e-122	4.04199	5.05364e-121	AT5G61820
chr5	9463000	9465599	2309	549	0	4.03998	0	AT5G26900
chr5	2786200	2787799	576	137	5.76785e-164	4.03859	4.38162e-163	AT5G08600
chr1	3032200	3034999	1154	275	0	4.03089	0	AT1G09390
chr1	3032200	3034999	1154	275	0	4.03089	0	AT1G09400
chr2	1334800	1336399	394	94	1.26926e-112	4.02621	7.54568e-112	AT2G04040
chr4	12266200	12267199	335	80	4.70692e-96	4.02238	2.55437e-95	AT4G23500
chr5	24065400	24065999	201	48	1.13565e-58	4.02238	4.9556e-58	AT5G59730
chr5	24065400	24065999	201	48	1.13565e-58	4.02238	4.9556e-58	AT5G59732
chr3	12449200	12451199	816	195	7.42545e-230	4.01961	7.48777e-229	AT3G30775
chr1	22155400	22157999	862	206	1.2134e-242	4.01946	1.28271e-241	AT1G60090
chr2	8898000	8899599	343	82	3.6755e-98	4.01798	2.01515e-97	AT2G20630
chr3	22254800	22255799	496	119	3.62946e-140	4.00371	2.44573e-139	AT3G60220
chr4	7951600	7952799	450	108	2.26869e-127	4.00237	1.44866e-126	AT4G13680
chr4	17780800	17781599	550	132	4.56405e-155	4.00237	3.30526e-154	AT4G37810
chr1	26450400	26451799	691	166	6.86635e-194	3.99851	5.89304e-193	AT1G70230
chr3	698800	700199	362	87	7.96023e-103	3.99685	4.47946e-102	AT3G03080
chr3	22563400	22568199	4381	1053	0	3.99644	0	AT3G60980
chr4	14119400	14121399	574	138	2.1867e-161	3.99541	1.6407e-160	AT4G28570
chr1	5089800	5091399	549	132	1.83112e-154	3.99509	1.31937e-153	AT1G14780
chr5	23708400	23709199	212	51	3.1316e-61	3.99295	1.38639e-60	AT5G58680
chr1	9432600	9433999	573	138	8.75702e-161	3.98844	6.5417e-160	AT1G27160
chr1	9432600	9433999	573	138	8.75702e-161	3.98844	6.5417e-160	AT1G27170
chr2	12683600	12684799	510	123	3.56074e-143	3.98284	2.41468e-142	AT2G29670
chr5	615400	615799	145	35	1.63646e-42	3.97949	6.37182e-42	AT5G02730
chr5	3199200	3199999	207	50	1.43137e-59	3.97675	6.28784e-59	AT5G10190
chr2	15011000	15012199	355	86	5.7797e-100	3.96513	3.20173e-99	AT2G35710
chr1	9733400	9738999	2805	680	0	3.96234	0	AT1G27940
chr5	25812200	25813399	330	80	4.90664e-93	3.96234	2.61943e-92	AT5G64570
chr5	16428600	16429999	1033	251	1.2944e-284	3.95325	1.60269e-283	AT5G41030
chr2	12582400	12583799	535	130	9.42914e-149	3.95311	6.62058e-148	AT2G29260
chr2	19077400	19078999	399	97	1.44894e-111	3.9512	8.57208e-111	AT2G46480
chr3	3897200	3904999	3113	761	0	3.92937	0	AT3G12220
chr3	3897200	3904999	3113	761	0	3.92937	0	AT3G12230
chr3	3897200	3904999	3113	761	0	3.92937	0	AT3G12240
chr2	6758800	6759999	364	89	2.46944e-101	3.92861	1.37872e-100	AT2G15480
chr2	10610400	10612399	1046	256	1.041e-285	3.92482	1.29458e-284	AT2G24940
chr2	10610400	10612399	1046	256	1.041e-285	3.92482	1.29458e-284	AT2G24945
chr5	26819000	26819799	306	75	2.28806e-85	3.91912	1.17516e-84	AT5G67210
chr4	16357600	16359399	950	233	4.27164e-259	3.91648	4.80123e-258	AT4G34160
chr3	5613400	5614399	273	67	2.52005e-76	3.91396	1.22569e-75	AT3G16500
chr5	6620600	6622399	493	121	1.10171e-135	3.91372	7.2971e-135	AT5G19610
chr4	14214200	14229799	12651	3112	0	3.90493	0	AT4G28775
chr4	14214200	14229799	12651	3112	0	3.90493	0	AT4G28780
chr4	14214200	14229799	12651	3112	0	3.90493	0	AT4G28790
chr4	14214200	14229799	12651	3112	0	3.90493	0	AT4G28800
chr4	14214200	14229799	12651	3112	0	3.90493	0	AT4G28811
chr4	14214200	14229799	12651	3112	0	3.90493	0	AT4G28815
chr1	24789400	24791999	811	200	3.64093e-220	3.8951	3.51366e-219	AT1G66460
chr3	1171800	1174599	2297	567	0	3.8914	0	AT3G04420
chr1	5734200	5738599	2149	531	0	3.8875	0	AT1G16770
chr1	5734200	5738599	2149	531	0	3.8875	0	AT1G16760
chr4	9311000	9313199	849	210	1.58892e-229	3.88344	1.60037e-228	AT4G16530
chr5	23412800	23413399	194	48	1.82445e-54	3.88229	7.71278e-54	AT5G57790
chr5	25298800	25299799	302	75	5.38647e-83	3.86789	2.72874e-82	AT5G63070
chr1	30054600	30057799	2326	578	0	3.86554	0	AT1G79910
chr1	30054600	30057799	2326	578	0	3.86554	0	AT1G79915
chr3	608600	611199	2326	578	0	3.86554	0	AT3G02810
chr1	1165200	1166199	338	84	1.69118e-92	3.86514	8.98348e-92	AT1G04350
chr1	20592000	20593999	430	107	8.95169e-117	3.86023	5.40077e-116	AT1G55200
chr3	18538200	18539599	534	133	3.31477e-144	3.85672	2.26407e-143	AT3G50010
chr1	9189200	9190199	289	72	3.08466e-79	3.85561	1.52641e-78	AT1G26590
chr5	1068600	1069599	329	82	8.48738e-90	3.85399	4.45575e-89	AT5G03960
chr5	17878000	17879999	786	196	1.20376e-210	3.85207	1.109e-209	AT5G44380
chr3	7406200	7408999	1494	373	0	3.84742	0	AT3G21120
chr3	7406200	7408999	1494	373	0	3.84742	0	AT3G21130
chr1	10824800	10825799	364	91	1.03376e-98	3.84227	5.68603e-98	AT1G30560
chr2	11213600	11214399	232	58	7.40865e-64	3.84227	3.35296e-63	AT2G26330
chr2	16197000	16198399	352	88	1.51885e-95	3.84227	8.2373e-95	AT2G38750
chr5	4267600	4270999	2377	595	0	3.83743	0	AT5G13320
chr2	2426400	2427199	371	93	3.08542e-100	3.83194	1.71477e-99	AT2G06200
chr4	15331200	15332199	247	62	1.69527e-67	3.82678	7.83441e-67	AT4G31650
chr3	20730800	20733799	1528	384	0	3.82226	0	AT3G55870
chr3	8701400	8702399	958	241	2.06181e-253	3.81836	2.27252e-252	AT3G24093
chr3	2931800	2933999	1235	311	0	3.81447	0	AT3G09550
chr5	15261000	15261799	349	88	8.64107e-94	3.80952	4.64505e-93	AT5G38210
chr3	20712000	20712799	214	54	1.86533e-58	3.80669	8.10654e-58	AT3G55810
chr2	12619800	12621199	424	107	2.9146e-113	3.80636	1.73877e-112	AT2G29430
chr2	12619800	12621199	424	107	2.9146e-113	3.80636	1.73877e-112	AT2G29440
chr3	7607200	7608399	400	101	6.26238e-107	3.80423	3.60488e-106	AT3G21600
chr1	4189200	4190999	1755	444	0	3.79684	0	AT1G12320
chr3	21216000	21216599	205	52	9.30589e-56	3.78685	3.97141e-55	AT3G57330
chr5	17420200	17425599	3111	790	0	3.78269	0	AT5G43380
chr5	17420200	17425599	3111	790	0	3.78269	0	AT5G43390
chr4	7608800	7609599	236	60	1.23921e-63	3.77823	5.60239e-63	AT4G13030
chr5	19620400	19621799	601	153	9.99929e-158	3.77321	7.31595e-157	AT5G48410
chr2	17499200	17500399	722	184	1.11573e-188	3.76918	9.39618e-188	AT2G41920
chr1	4839800	4841799	965	246	3.81581e-251	3.76808	4.17342e-250	AT1G14150
chr1	4839800	4841799	965	246	3.81581e-251	3.76808	4.17342e-250	AT1G14160
chr2	9179600	9181199	553	141	4.51548e-145	3.76733	3.09659e-144	AT2G21450
chr3	7500600	7501999	556	142	1.50403e-145	3.7611	1.03391e-144	AT3G21320
chr5	21137200	21140599	2243	574	0	3.75358	0	AT5G52050
chr3	21262800	21265999	1882	482	0	3.7506	0	AT3G57460
chr5	5574600	5582599	3368	863	0	3.74877	0	AT5G16960
chr5	5574600	5582599	3368	863	0	3.74877	0	AT5G16970
chr5	5574600	5582599	3368	863	0	3.74877	0	AT5G16980
chr5	5574600	5582599	3368	863	0	3.74877	0	AT5G16990
chr2	8493600	8495799	1299	335	0	3.72471	0	AT2G19650
chr1	172200	172799	252	65	1.31844e-66	3.72405	6.06016e-66	AT1G01470
chr2	12630400	12633799	1461	377	0	3.72252	0	AT2G29480
chr2	12630400	12633799	1461	377	0	3.72252	0	AT2G29500
chr2	12630400	12633799	1461	377	0	3.72252	0	AT2G29490
chr4	8208800	8210399	1267	327	0	3.72183	0	AT4G14250
chr3	5556200	5561199	2860	741	0	3.70745	0	AT3G16370
chr3	5556200	5561199	2860	741	0	3.70745	0	AT3G16380
chr1	6057200	6058199	316	82	2.91713e-82	3.7017	1.46994e-81	AT1G17610
chr3	5325400	5327399	578	150	2.99204e-148	3.70139	2.09051e-147	AT3G15720
chr1	22608600	22609599	300	78	4.84647e-78	3.69449	2.3789e-77	AT1G61300
chr5	20203600	20204399	219	57	1.38731e-57	3.6906	5.98035e-57	AT5G49730
chr5	14839200	14845399	2651	690	0	3.69053	0	AT5G37415
chr5	14839200	14845399	2651	690	0	3.69053	0	AT5G37420
chr5	14839200	14845399	2651	690	0	3.69053	0	AT5G37440
chr5	14839200	14845399	2651	690	0	3.69053	0	AT5G37430
chr4	17978600	17979599	407	106	1.0071e-104	3.68822	5.7163e-104	AT4G38400
chr1	18474200	18477999	2421	631	0	3.68547	0	AT1G49900
chr1	6059000	6060799	1165	304	6.01682e-294	3.68112	7.7537e-293	AT1G17615
chr2	11251000	11254799	2003	523	0	3.67881	0	AT2G26450
chr1	28885400	28888199	2120	554	0	3.67582	0	AT1G76910
chr1	29591000	29593199	528	138	1.80233e-134	3.67522	1.18639e-133	AT1G78670
chr5	8706000	8707599	459	120	3.30534e-117	3.67417	1.99985e-116	AT5G25190
chr2	18374400	18376599	906	237	1.60607e-228	3.67204	1.61192e-227	AT2G44500
chr2	11523400	11524999	714	187	2.06749e-180	3.66762	1.68621e-179	AT2G27000
chr5	214600	216599	1252	328	0	3.66656	0	AT5G01550
chr3	19712800	19714799	534	140	1.91199e-135	3.66388	1.26443e-134	AT3G53190
chr3	5109400	5111799	2936	770	0	3.66263	0	AT3G15170
chr3	6517800	6519599	475	125	3.26603e-120	3.65016	2.01464e-119	AT3G18900
chr1	4931200	4934599	1736	457	0	3.6489	0	AT1G14430
chr1	4931200	4934599	1736	457	0	3.6489	0	AT1G14420
chr4	8211400	8214399	2278	600	0	3.64696	0	AT4G14250
chr4	8211400	8214399	2278	600	0	3.64696	0	AT4G14251
chr4	13380400	13380999	186	49	1.4473e-48	3.64624	5.89353e-48	AT4G26488
chr4	13380400	13380999	186	49	1.4473e-48	3.64624	5.89353e-48	AT4G26490
chr1	19574800	19575799	239	63	1.2012e-61	3.64406	5.34558e-61	AT1G52560
chr1	18011000	18013199	1202	318	5.76323e-298	3.63083	7.5524e-297	AT1G48698
chr1	18011000	18013199	1202	318	5.76323e-298	3.63083	7.5524e-297	AT1G48700
chr2	16375800	16376799	291	77	3.73737e-74	3.6302	1.79524e-73	AT2G39220
chr5	15411800	15413199	831	220	1.08678e-206	3.62833	9.8526e-206	AT5G38490
chr5	23567600	23568599	370	98	1.81831e-93	3.62663	9.72542e-93	AT5G58280
chr2	16222200	16222999	215	57	2.56743e-55	3.62319	1.09186e-54	AT2G38820
chr4	1432600	1433799	659	175	7.61272e-164	3.61722	5.77794e-163	AT4G03270
chr5	17546400	17547399	463	123	7.3707e-116	3.6158	4.42501e-115	AT5G43690
chr4	18389600	18390399	267	71	7.86726e-68	3.61228	3.63967e-67	AT4G39600
chr3	7782800	7784599	1962	522	0	3.61041	0	AT3G22090
chr3	7782800	7784599	1962	522	0	3.61041	0	AT3G22100
chr3	22805400	22805999	233	62	1.8207e-59	3.60988	7.98579e-59	AT3G61630
chr3	18896400	18897999	481	128	5.31676e-120	3.60963	3.27253e-119	AT3G50835
chr3	18896400	18897999	481	128	5.31676e-120	3.60963	3.27253e-119	AT3G50840
chr2	19164400	19167999	1168	311	2.97988e-287	3.60753	3.76056e-286	AT2G46670
chr2	19164400	19167999	1168	311	2.97988e-287	3.60753	3.76056e-286	AT2G46680
chr3	9344800	9346399	443	118	1.34493e-110	3.6062	7.92925e-110	AT3G25670
chr1	17073800	17076999	2004	534	0	3.60483	0	AT1G45145
chr1	2164600	2165199	240	64	5.15803e-61	3.60213	2.28114e-60	AT1G07050
chr1	1376000	1379399	1466	391	0	3.60151	0	AT1G04880
chr5	9527600	9529199	836	223	6.24386e-206	3.60105	5.64861e-205	AT5G27070
chr3	5304800	5307399	868	232	3.68123e-213	3.59385	3.43219e-212	AT3G15650
chr2	19437800	19438399	243	65	1.65188e-61	3.59105	7.33968e-61	AT2G47360
chr2	10189600	10190399	228	61	7.48399e-58	3.59032	3.2327e-57	AT2G23950
chr4	17565000	17568999	2857	765	0	3.58738	0	AT4G37340
chr4	17565000	17568999	2857	765	0	3.58738	0	AT4G37360
chr3	19705800	19706399	179	48	8.00732e-46	3.58212	3.19506e-45	AT3G53170
chr3	21070600	21072399	507	136	4.53966e-125	3.58094	2.86448e-124	AT3G56920
chr1	29430400	29431599	674	181	3.88307e-165	3.57692	2.97098e-164	AT1G78230
chr1	10948800	10949399	186	50	2.25142e-47	3.57331	9.07267e-47	AT1G30820
chr5	25568600	25569399	275	74	9.31413e-69	3.56968	4.34676e-68	AT5G63900
chr5	1715800	1718599	2337	629	0	3.56891	0	AT5G05710
chr5	1715800	1718599	2337	629	0	3.56891	0	AT5G05720
chr3	3751800	3752599	204	55	1.57098e-51	3.56283	6.51217e-51	AT3G11880
chr3	21629000	21631799	875	236	2.27035e-212	3.56143	2.10985e-211	AT3G58480
chr2	8848800	8849999	430	116	1.02953e-105	3.56073	5.88665e-105	AT2G20560
chr4	13875600	13877199	411	111	5.16828e-101	3.5567	2.87797e-100	AT4G27860
chr1	8182000	8183599	1128	305	4.44353e-272	3.55253	5.20711e-271	AT1G23080
chr5	19186200	19188799	1130	306	5.01971e-272	3.54719	5.87423e-271	AT5G47250
chr4	7246600	7249199	1822	494	0	3.54282	0	AT4G12100
chr5	4438400	4439399	247	67	2.15983e-61	3.5412	9.58661e-61	AT5G13750
chr3	22914400	22915199	269	73	1.34502e-66	3.53963	6.17898e-66	AT3G61890
chr5	15463200	15464999	1304	354	0	3.53836	0	AT5G38620
chr1	19580200	19580599	136	37	8.91966e-35	3.53074	3.28556e-34	AT1G52565
chr4	12044000	12047199	2451	667	0	3.52976	0	AT4G22980
chr3	2915000	2916399	349	95	2.62045e-85	3.52882	1.34386e-84	AT3G09480
chr3	2915000	2916399	349	95	2.62045e-85	3.52882	1.34386e-84	AT3G09490
chr5	22594600	22596199	349	95	2.62045e-85	3.52882	1.34386e-84	AT5G55830
chr4	13904600	13905399	213	58	4.99297e-53	3.5276	2.09312e-52	AT4G27940
chr5	23589600	23590999	906	247	9.3499e-217	3.52338	8.87253e-216	AT5G58360
chr1	4620400	4621599	396	108	3.28755e-96	3.52208	1.78637e-95	AT1G13470
chr5	102400	103599	454	124	1.04335e-109	3.51692	6.13002e-109	AT5G01250
chr1	29329800	29332199	800	219	1.07248e-190	3.50892	9.07668e-190	AT1G78000
chr5	1974800	1975399	197	54	8.04694e-49	3.50429	3.27834e-48	AT5G06470
chr2	14573400	14573799	124	34	1.30204e-31	3.50325	4.67693e-31	AT2G34600
chr1	25352200	25357999	3053	838	0	3.49954	0	AT1G67640
chr1	7193600	7196399	1672	459	0	3.49906	0	AT1G20730
chr1	23089600	23093399	1562	429	0	3.49745	0	AT1G62400
chr1	23089600	23093399	1562	429	0	3.49745	0	AT1G62410
chr2	2072200	2073599	659	181	6.87455e-157	3.49732	5.01255e-156	AT2G05600
chr1	22767600	22768199	262	72	6.72068e-64	3.4954	3.04321e-63	AT1G61667
chr4	15390600	15392399	982	270	4.11538e-232	3.49362	4.17956e-231	AT4G31820
chr5	787600	788799	389	107	1.61069e-93	3.49216	8.63659e-93	AT5G03280
chr1	28951800	28952999	396	109	4.52293e-95	3.48977	2.44364e-94	AT1G77060
chr5	25891400	25893599	817	225	3.64064e-193	3.48793	3.1183e-192	AT5G64750
chr1	8143400	8145199	1099	303	1.70456e-258	3.48404	1.91336e-257	AT1G23000
chr5	76800	78399	914	252	1.9021e-215	3.48396	1.795e-214	AT5G01200
chr3	20137800	20142599	2346	647	0	3.48299	0	AT3G54390
chr3	20137800	20142599	2346	647	0	3.48299	0	AT3G54400
chr5	24866800	24867599	239	66	3.8004e-58	3.47842	1.64575e-57	AT5G61930
chr1	9148800	9150999	1401	387	0	3.4774	0	AT1G26450
chr3	10009600	10011999	1999	553	0	3.47229	0	AT3G27150
chr4	18271400	18272799	495	137	2.45302e-117	3.47066	1.48733e-116	AT4G39250
chr4	6263200	6266999	1752	485	0	3.46993	0	AT4G10010
chr4	12771200	12772199	372	103	8.76301e-89	3.46924	4.58072e-88	AT4G24780
chr2	7772200	7772799	303	84	1.12694e-72	3.46491	5.37691e-72	AT2G17890
chr1	26151800	26153399	422	117	3.42037e-100	3.46461	1.89845e-99	AT1G69550
chr1	6325800	6329999	1816	504	0	3.46109	0	AT1G18382
chr1	6325800	6329999	1816	504	0	3.46109	0	AT1G18390
chr4	13733000	13734199	371	103	3.05154e-88	3.45991	1.58543e-87	AT4G27460
chr3	20016800	20017999	823	229	6.17766e-192	3.45217	5.2649e-191	AT3G54050
chr5	22464400	22467999	2749	765	0	3.45177	0	AT5G55430
chr5	22464400	22467999	2749	765	0	3.45177	0	AT5G55440
chr5	22464400	22467999	2749	765	0	3.45177	0	AT5G55450
chr5	6297000	6300399	1412	393	0	3.4512	0	AT5G18870
chr3	17128200	17129599	449	125	7.33446e-106	3.45036	4.19653e-105	AT3G46520
chr4	16235600	16236399	219	61	6.68431e-53	3.4486	2.79529e-52	AT4G33870
chr2	14833600	14834799	878	245	8.33443e-204	3.44236	7.47645e-203	AT2G35200
chr4	8463000	8463399	136	38	1.22878e-33	3.43782	4.48748e-33	AT4G14746
chr5	25684200	25685799	1016	284	7.39866e-235	3.4364	7.5863e-234	AT5G64210
chr3	21345200	21347799	826	231	2.46389e-191	3.43476	2.09566e-190	AT3G57640
chr3	21345200	21347799	826	231	2.46389e-191	3.43476	2.09566e-190	AT3G57645
chr2	1357400	1359199	1001	280	3.22134e-231	3.43403	3.26769e-230	AT2G04080
chr3	4940400	4943199	2100	588	0	3.4306	0	AT3G14700
chr3	4940400	4943199	2100	588	0	3.4306	0	AT3G14710
chr3	22092400	22093999	396	111	7.74922e-93	3.42689	4.12921e-92	AT3G59790
chr1	7200000	7201999	1045	293	1.69736e-240	3.42592	1.77889e-239	AT1G20740
chr3	7578200	7579599	595	167	6.35574e-138	3.42238	4.24263e-137	AT3G21510
chr4	12802400	12806199	900	253	8.56055e-207	3.41704	7.76915e-206	AT4G24860
chr4	13056200	13059799	1827	514	0	3.41431	0	AT4G25585
chr4	13056200	13059799	1827	514	0	3.41431	0	AT4G25590
chr4	13056200	13059799	1827	514	0	3.41431	0	AT4G25580
chr2	15973200	15973799	199	56	1.16054e-47	3.41345	4.69219e-47	AT2G38120
chr3	976800	977599	302	85	5.02189e-71	3.41284	2.37482e-70	AT3G03820
chr3	21133600	21135399	731	206	6.35775e-168	3.40862	4.93073e-167	AT3G57100
chr3	21133600	21135399	731	206	6.35775e-168	3.40862	4.93073e-167	AT3G57110
chr3	9551800	9556399	1941	547	0	3.40852	0	AT3G26130
chr3	9551800	9556399	1941	547	0	3.40852	0	AT3G26125
chr2	12306400	12308999	960	271	3.70533e-219	3.40275	3.56372e-218	AT2G28690
chr2	13139000	13139999	354	100	2.03931e-82	3.40041	1.02943e-81	AT2G30860
chr1	3515400	3517999	856	242	2.5156e-195	3.39771	2.17874e-194	AT1G10640
chr5	3003800	3005599	1516	429	0	3.39445	0	AT5G09700
chr1	5518400	5519599	409	116	2.56894e-94	3.38683	1.38356e-93	AT1G16110
chr1	7084600	7085599	384	109	1.30201e-88	3.38402	6.79353e-88	AT1G20440
chr3	3858200	3859199	310	88	5.05069e-72	3.38382	2.39641e-71	AT3G12110
chr3	20279000	20279199	81	23	1.46394e-20	3.38287	4.8071e-20	AT3G54780
chr5	23174000	23180199	2883	819	0	3.38134	0	AT5G57190
chr5	23174000	23180199	2883	819	0	3.38134	0	AT5G57200
chr3	5464600	5466599	834	237	4.68184e-189	3.38023	3.94671e-188	AT3G16117
chr3	5464600	5466599	834	237	4.68184e-189	3.38023	3.94671e-188	AT3G16120
chr3	5464600	5466599	834	237	4.68184e-189	3.38023	3.94671e-188	AT3G16130
chr3	10597400	10598999	576	164	4.56844e-131	3.3737	2.97053e-130	AT3G28345
chr2	10906600	10907199	337	96	1.035e-77	3.37199	5.07156e-77	AT2G25625
chr1	1458400	1462199	1975	565	0	3.35774	0	AT1G05080
chr1	1458400	1462199	1975	565	0	3.35774	0	AT1G05085
chr1	1458400	1462199	1975	565	0	3.35774	0	AT1G05070
chr1	24833400	24834599	359	103	7.85786e-82	3.348	3.94326e-81	AT1G66560
chr1	26122000	26123399	944	271	1.08111e-210	3.34604	9.97076e-210	AT1G69490
chr1	18209400	18209999	188	54	5.68618e-44	3.3442	2.23852e-43	AT1G49230
chr4	18020400	18022999	2062	593	0	3.34012	0	AT4G38545
chr4	18020400	18022999	2062	593	0	3.34012	0	AT4G38530
chr3	9260800	9263199	691	199	2.74055e-154	3.33544	1.9713e-153	AT3G25510
chr1	9763000	9773999	4816	1387	0	3.33532	0	AT1G28020
chr1	9763000	9773999	4816	1387	0	3.33532	0	AT1G28030
chr1	9763000	9773999	4816	1387	0	3.33532	0	AT1G28040
chr1	9763000	9773999	4816	1387	0	3.33532	0	AT1G28010
chr5	21975600	21978199	1055	304	6.15198e-234	3.33355	6.28533e-233	AT5G54148
chr5	21975600	21978199	1055	304	6.15198e-234	3.33355	6.28533e-233	AT5G54150
chr5	10677600	10679199	760	219	2.74245e-169	3.33348	2.13856e-168	AT5G28650
chr2	13162200	13163199	326	94	4.79696e-74	3.33133	2.30162e-73	AT2G30930
chr4	14161400	14162999	1368	395	1.18187e-301	3.32673	1.56561e-300	AT4G28700
chr4	13971400	13975999	1717	497	0	3.3185	0	AT4G28130
chr4	13971400	13975999	1717	497	0	3.3185	0	AT4G28140
chr5	2433000	2438599	3150	914	0	3.31049	0	AT5G07680
chr4	14811400	14813199	1381	401	3.89137e-302	3.30809	5.17092e-301	AT4G30250
chr1	19831600	19832799	688	200	1.13975e-151	3.30435	8.08919e-151	AT1G53180
chr2	12482000	12483999	653	190	6.57732e-144	3.30132	4.47814e-143	AT2G29060
chr5	17204000	17204799	268	78	1.48139e-60	3.30041	6.5345e-60	AT5G42910
chr2	9810200	9812199	528	154	1.75144e-116	3.29338	1.0537e-115	AT2G23050
chr1	9241200	9243599	941	275	6.26072e-205	3.28689	5.6459e-204	AT1G26730
chr5	23676800	23677999	999	292	2.44055e-217	3.28633	2.32629e-216	AT5G58580
chr3	22662800	22663599	260	76	1.76677e-58	3.28615	7.68213e-58	AT3G61220
chr4	16530600	16532599	431	126	2.92672e-95	3.28575	1.58325e-94	AT4G34610
chr5	24488600	24489599	382	112	2.18958e-84	3.27622	1.11651e-83	AT5G60880
chr3	6723000	6724799	610	179	4.8615e-133	3.27344	3.18048e-132	AT3G19390
chr2	18400800	18401399	320	94	6.42771e-71	3.27002	3.03458e-70	AT2G44578
chr4	13119200	13119599	194	57	5.94604e-44	3.2693	2.33974e-43	AT4G25770
chr4	17423000	17423999	673	198	5.63031e-146	3.26496	3.8861e-145	AT4G36950
chr5	5995600	5996199	224	66	3.51059e-50	3.26011	1.44332e-49	AT5G18130
chr1	28389600	28391799	1411	416	3.88396e-302	3.25808	5.16911e-301	AT1G75600
chr2	18779400	18784599	4396	1297	0	3.25571	0	AT2G45570
chr2	18779400	18784599	4396	1297	0	3.25571	0	AT2G45580
chr5	4430000	4430599	166	49	1.01415e-37	3.25417	3.82482e-37	AT5G13730
chr1	3867400	3873999	5084	1502	0	3.25135	0	AT1G11490
chr1	3867400	3873999	5084	1502	0	3.25135	0	AT1G11500
chr1	3867400	3873999	5084	1502	0	3.25135	0	AT1G11510
chr1	3867400	3873999	5084	1502	0	3.25135	0	AT1G11520
chr4	11975200	11976799	704	208	1.12435e-151	3.25115	7.98652e-151	AT4G22790
chr1	8608000	8608999	656	194	2.48446e-141	3.24811	1.67814e-140	AT1G24270
chr5	4850000	4851399	358	106	3.5242e-78	3.24418	1.73585e-77	AT5G14990
chr5	4850000	4851399	358	106	3.5242e-78	3.24418	1.73585e-77	AT5G14980
chr4	18410000	18410999	597	177	2.1055e-128	3.23988	1.35053e-127	AT4G39670
chr4	2633000	2634999	672	200	1.99774e-143	3.22751	1.35691e-142	AT4G05120
chr4	14026600	14027599	309	92	2.62501e-67	3.22625	1.2118e-66	AT4G28350
chr1	12981600	12984599	1040	310	5.31155e-220	3.22255	5.1201e-219	AT1G35350
chr1	3215400	3217599	597	178	2.16506e-127	3.22168	1.38353e-126	AT1G09890
chr5	19281400	19282599	834	249	1.46495e-176	3.21732	1.17568e-175	AT5G47530
chr3	10958000	10958799	211	63	1.46141e-46	3.21714	5.8587e-46	AT3G28925
chr1	22980800	22981999	492	147	3.87263e-105	3.21496	2.20543e-104	AT1G62190
chr1	7384600	7388399	2181	652	0	3.21319	0	AT1G21090
chr1	7384600	7388399	2181	652	0	3.21319	0	AT1G21100
chr1	21941000	21941799	321	96	2.15853e-69	3.2119	1.01178e-68	AT1G59720
chr5	3007200	3018399	8057	2410	0	3.21133	0	AT5G09710
chr5	3007200	3018399	8057	2410	0	3.21133	0	AT5G09711
chr5	3007200	3018399	8057	2410	0	3.21133	0	AT5G09720
chr5	3007200	3018399	8057	2410	0	3.21133	0	AT5G09730
chr3	18929800	18931599	1136	340	1.1571e-238	3.20943	1.20823e-237	AT3G50930
chr3	618400	619399	497	149	1.13164e-105	3.20404	6.46621e-105	AT3G02840
chr2	9170600	9173199	909	273	1.38671e-190	3.19837	1.17245e-189	AT2G21420
chr2	9170600	9173199	909	273	1.38671e-190	3.19837	1.17245e-189	AT2G21430
chr4	12579000	12580399	659	198	7.92266e-139	3.19704	5.30937e-138	AT4G24260
chr2	17135800	17136399	173	52	2.9287e-38	3.19574	1.10797e-37	AT2G41090
chr3	22671200	22672599	448	135	8.0345e-95	3.18766	4.33538e-94	AT3G61250
chr5	26237200	26237799	209	63	1.52611e-45	3.18665	6.07809e-45	AT5G65640
chr5	21965200	21966799	315	95	2.39425e-67	3.18504	1.10586e-66	AT5G54130
chr5	21965200	21966799	315	95	2.39425e-67	3.18504	1.10586e-66	AT5G54140
chr1	11475400	11477999	1000	302	9.85657e-208	3.18069	8.98359e-207	AT1G31950
chr3	9565000	9571999	5094	1539	0	3.17942	0	AT3G26147
chr3	9565000	9571999	5094	1539	0	3.17942	0	AT3G26150
chr3	9565000	9571999	5094	1539	0	3.17942	0	AT3G26160
chr1	19470600	19472599	989	299	3.68524e-205	3.17726	3.32685e-204	AT1G52290
chr5	24974000	24975399	377	114	8.29542e-80	3.17661	4.12162e-79	AT5G62170
chr1	26540000	26540599	205	62	1.63681e-44	3.17607	6.46763e-44	AT1G70420
chr5	16051800	16054199	1139	345	3.23749e-235	3.17127	3.3316e-234	AT5G40120
chr1	8014400	8016199	640	194	3.28663e-133	3.16888	2.15348e-132	AT1G22650
chr1	8014400	8016199	640	194	3.28663e-133	3.16888	2.15348e-132	AT1G22651
chr5	16020400	16021799	732	222	7.26971e-152	3.16728	5.17247e-151	AT5G40010
chr3	6725600	6726399	211	64	1.46443e-45	3.16687	5.83513e-45	AT3G19400
chr4	13110000	13115199	2081	632	0	3.16288	0	AT4G25750
chr2	9279800	9283799	3269	993	0	3.16223	0	AT2G21730
chr2	9279800	9283799	3269	993	0	3.16223	0	AT2G21740
chr2	9279800	9283799	3269	993	0	3.16223	0	AT2G21750
chr3	8647000	8647599	171	52	3.02379e-37	3.15879	1.13564e-36	AT3G23930
chr3	20850200	20850799	171	52	3.02379e-37	3.15879	1.13564e-36	AT3G56200
chr1	21684400	21688199	2124	646	0	3.15828	0	AT1G58370
chr1	5920600	5921799	585	178	2.49414e-121	3.15692	1.54858e-120	AT1G17285
chr3	6032600	6033599	368	112	2.98026e-77	3.15615	1.45449e-76	AT3G17640
chr1	28174400	28183599	7569	2305	0	3.15425	0	AT1G75030
chr1	28174400	28183599	7569	2305	0	3.15425	0	AT1G75040
chr1	28174400	28183599	7569	2305	0	3.15425	0	AT1G75060
chr1	28174400	28183599	7569	2305	0	3.15425	0	AT1G75050
chr4	13666200	13672599	3118	950	0	3.15268	0	AT4G27290
chr4	13666200	13672599	3118	950	0	3.15268	0	AT4G27300
chr4	15368200	15369599	679	207	5.19126e-140	3.15085	3.49264e-139	AT4G31760
chr2	19600600	19602199	567	173	3.2753e-117	3.14822	1.98308e-116	AT2G47860
chr2	17713000	17714199	901	275	1.34954e-184	3.14717	1.12211e-183	AT2G42550
chr5	4214400	4216599	1739	531	0	3.14581	0	AT5G13210
chr4	16824800	16826999	1102	337	1.56189e-224	3.14109	1.53331e-223	AT4G35380
chr1	3055800	3058199	1383	423	5.20066e-281	3.14058	6.35628e-280	AT1G09470
chr1	3055800	3058199	1383	423	5.20066e-281	3.14058	6.35628e-280	AT1G09480
chr1	6886800	6887399	183	56	2.39048e-39	3.139	9.12041e-39	AT1G19850
chr5	22246600	22247999	1160	355	5.98224e-236	3.13876	6.18599e-235	AT5G54770
chr5	4853400	4853999	235	72	9.25379e-50	3.13519	3.79722e-49	AT5G14995
chr3	5800200	5801599	375	115	7.95708e-78	3.13229	3.90125e-77	AT3G17010
chr2	1064000	1065199	427	131	3.25984e-88	3.13101	1.69159e-87	AT2G03505
chr4	6154800	6155999	365	112	9.40486e-76	3.13042	4.56387e-75	AT4G09770
chr2	17587200	17590199	2456	754	0	3.12885	0	AT2G42200
chr2	17587200	17590199	2456	754	0	3.12885	0	AT2G42210
chr2	14066600	14070399	1764	542	0	3.12628	0	AT2G33180
chr2	14066600	14070399	1764	542	0	3.12628	0	AT2G33190
chr2	14066600	14070399	1764	542	0	3.12628	0	AT2G33200
chr3	16097200	16097999	302	93	8.65627e-63	3.11926	3.88054e-62	AT3G44490
chr4	10865000	10866399	529	163	5.48522e-108	3.11743	3.18113e-107	AT4G20080
chr2	9055600	9056199	318	98	6.49709e-66	3.11694	2.97513e-65	AT2G21130
chr5	2089400	2090399	584	180	6.8233e-119	3.11651	4.17572e-118	AT5G06760
chr1	1425600	1426199	240	74	2.58926e-50	3.11535	1.06607e-49	AT1G05000
chr5	21869600	21871399	2104	649	0	3.11407	0	AT5G53870
chr5	344000	344999	392	121	1.76379e-80	3.11192	8.80965e-80	AT5G01890
chr3	19432800	19434199	609	188	1.37816e-123	3.11163	8.67042e-123	AT3G52430
chr3	6897800	6902599	3372	1041	0	3.11146	0	AT3G19850
chr1	12374400	12375599	596	184	5.4197e-121	3.1114	3.3577e-120	AT1G34040
chr3	19804400	19805399	217	67	1.23391e-45	3.11109	4.91892e-45	AT3G53420
chr5	17325000	17325799	204	63	4.94915e-43	3.11041	1.93232e-42	AT5G43150
chr3	9498400	9499599	492	152	3.12967e-100	3.10921	1.73823e-99	AT3G25960
chr1	2318200	2326399	4308	1331	0	3.10904	0	AT1G07540
chr1	2318200	2326399	4308	1331	0	3.10904	0	AT1G07550
chr4	2445600	2446999	278	86	1.27868e-57	3.10509	5.51488e-57	AT4G04830
chr5	26728000	26729999	1286	398	5.18965e-257	3.10374	5.79488e-256	AT5G66940
chr5	3341400	3341999	281	87	3.8062e-58	3.10252	1.64742e-57	AT5G10570
chr4	12072800	12073999	410	127	1.23742e-83	3.10105	6.28736e-83	AT4G23030
chr1	8185200	8188999	1458	452	2.79184e-290	3.09847	3.56545e-289	AT1G23090
chr2	7953000	7954399	403	125	4.34125e-82	3.09687	2.18497e-81	AT2G18300
chr5	9530000	9531199	319	99	1.89014e-65	3.09516	8.61827e-65	AT5G27080
chr5	23389800	23391799	1472	457	2.05044e-292	3.094	2.63438e-291	AT5G57720
chr3	3707000	3708399	351	109	1.06469e-71	3.0932	5.04322e-71	AT3G11720
chr3	6417200	6421999	4486	1394	0	3.09118	0	AT3G18650
chr3	6417200	6421999	4486	1394	0	3.09118	0	AT3G18660
chr1	16787800	16789399	740	230	4.08143e-148	3.09052	2.84932e-147	AT1G44130
chr1	671400	672599	505	157	7.13214e-102	3.08972	3.99765e-101	AT1G02965
chr1	25829200	25833399	1251	389	2.36441e-248	3.08913	2.55974e-247	AT1G68760
chr1	25829200	25833399	1251	389	2.36441e-248	3.08913	2.55974e-247	AT1G68765
chr1	25829200	25833399	1251	389	2.36441e-248	3.08913	2.55974e-247	AT1G68770
chr1	25829200	25833399	1251	389	2.36441e-248	3.08913	2.55974e-247	AT1G68780
chr4	10668200	10670399	839	261	2.35136e-167	3.0878	1.82028e-166	AT4G19580
chr1	26149000	26149799	196	61	5.49049e-41	3.08641	2.11847e-40	AT1G69550
chr1	7430000	7432199	543	169	3.62206e-109	3.08632	2.11933e-108	AT1G21230
chr3	21836800	21837599	234	73	2.65269e-48	3.07908	1.07814e-47	AT3G59080
chr4	6748800	6751199	644	201	1.87966e-128	3.07764	1.20748e-127	AT4G11050
chr3	1625800	1628199	1839	575	0	3.07215	0	AT3G05610
chr3	23354000	23354999	486	152	2.79214e-97	3.07129	1.52398e-96	AT3G63210
chr3	1719400	1720999	316	99	5.62951e-64	3.06605	2.55183e-63	AT3G05780
chr3	1719400	1720999	316	99	5.62951e-64	3.06605	2.55183e-63	AT3G05790
chr2	8042200	8044999	957	300	2.34797e-188	3.06421	1.97345e-187	AT2G18540
chr5	17345000	17346799	1432	449	2.19026e-280	3.06355	2.6617e-279	AT5G43200
chr1	18679000	18679799	220	69	3.28677e-45	3.06268	1.30355e-44	AT1G50420
chr5	19820200	19820799	229	72	8.55762e-47	3.05514	3.43715e-46	AT5G48890
chr5	18584000	18588599	3454	1087	0	3.05225	0	AT5G45810
chr5	18584000	18588599	3454	1087	0	3.05225	0	AT5G45820
chr1	1677400	1678799	1102	347	4.8539e-215	3.05056	4.56545e-214	AT1G05615
chr5	7162200	7163199	412	130	8.69682e-82	3.04426	4.36171e-81	AT5G21080
chr4	10318000	10319599	415	131	2.58144e-82	3.04302	1.30232e-81	AT4G18790
chr3	20314000	20315199	532	168	9.74481e-105	3.0418	5.53482e-104	AT3G54830
chr3	20705400	20708799	2017	637	0	3.04155	0	AT3G55780
chr3	20705400	20708799	2017	637	0	3.04155	0	AT3G55790
chr3	17438200	17444399	2669	844	0	3.03762	0	AT3G47340
chr3	17438200	17444399	2669	844	0	3.03762	0	AT3G47341
chr1	1001200	1002999	939	297	2.08032e-182	3.03695	1.70975e-181	AT1G03920
chr2	10397600	10398199	196	62	4.80867e-40	3.03663	1.84289e-39	AT2G24480
chr2	10397600	10398199	196	62	4.80867e-40	3.03663	1.84289e-39	AT2G24490
chr5	5867200	5869199	1337	423	1.86876e-258	3.03612	2.09493e-257	AT5G17780
chr4	10221200	10223399	1640	519	0	3.03532	0	AT4G18540
chr2	14181200	14182199	420	133	6.93881e-83	3.03337	3.51097e-82	AT2G33480
chr3	4971000	4975799	4453	1411	0	3.03147	0	AT3G14810
chr1	4887200	4887999	224	71	2.72295e-45	3.03052	1.08246e-44	AT1G14315
chr3	17210800	17212399	784	249	8.49242e-152	3.02444	6.03741e-151	AT3G46720
chr3	1776000	1776799	667	212	2.15698e-129	3.02216	1.38982e-128	AT3G05937
chr5	21796600	21809399	8330	2649	0	3.02058	0	AT5G53670
chr5	21796600	21809399	8330	2649	0	3.02058	0	AT5G53680
chr5	21796600	21809399	8330	2649	0	3.02058	0	AT5G53690
chr5	21796600	21809399	8330	2649	0	3.02058	0	AT5G53700
chr5	21796600	21809399	8330	2649	0	3.02058	0	AT5G53710
chr5	21796600	21809399	8330	2649	0	3.02058	0	AT5G53720
chr5	21796600	21809399	8330	2649	0	3.02058	0	AT5G53730
chr5	16561600	16567399	3002	955	0	3.0195	0	AT5G41380
chr5	16561600	16567399	3002	955	0	3.0195	0	AT5G41390
chr2	19289600	19291599	884	282	1.10275e-169	3.01114	8.6229e-169	AT2G46950
chr4	819800	820799	294	94	6.11842e-58	3.00433	2.64553e-57	AT4G01895
chr4	819800	820799	294	94	6.11842e-58	3.00433	2.64553e-57	AT4G01897
chr2	19369400	19370599	375	120	3.96958e-73	3.00177	1.89505e-72	AT2G47180
chr4	18519800	18520999	430	138	4.03208e-83	2.99307	2.04383e-82	AT4G39940
chr5	25963400	25964599	324	104	3.13991e-63	2.99254	1.41354e-62	AT5G64990
chr1	18731000	18731599	193	62	1.35645e-38	2.99015	5.1591e-38	AT1G50580
chr5	4449200	4450999	772	248	5.893e-147	2.99015	4.09391e-146	AT5G13790
chr4	11647600	11648399	339	109	7.11019e-66	2.98745	3.25239e-65	AT4G21960
chr5	15969000	15972199	1564	503	2.07067e-294	2.98674	2.6765e-293	AT5G39870
chr5	15969000	15972199	1564	503	2.07067e-294	2.98674	2.6765e-293	AT5G39880
chr1	19204400	19207599	982	316	1.02139e-185	2.98506	8.51757e-185	AT1G51780
chr1	19204400	19207599	982	316	1.02139e-185	2.98506	8.51757e-185	AT1G51790
chr5	8125600	8129799	3670	1181	0	2.985	0	AT5G24050
chr5	8125600	8129799	3670	1181	0	2.985	0	AT5G24040
chr5	18024800	18025799	239	77	5.05151e-47	2.9815	2.0318e-46	AT5G44680
chr4	7310800	7312599	564	182	2.49079e-107	2.9767	1.43963e-106	AT4G12310
chr3	2167800	2168599	251	81	3.83898e-49	2.97657	1.567e-48	AT3G06868
chr3	2167800	2168599	251	81	3.83898e-49	2.97657	1.567e-48	AT3G06870
chr2	13003000	13005799	1901	616	0	2.96435	0	AT2G30520
chr3	8886400	8890799	1318	428	7.28519e-245	2.95801	7.77847e-244	AT3G24460
chr5	8148800	8151199	1227	399	1.16606e-227	2.95393	1.16756e-226	AT5G24100
chr4	5803800	5805999	578	188	1.31318e-108	2.95323	7.63127e-108	AT4G09080
chr1	340400	341999	2010	654	0	2.9522	0	AT1G01980
chr3	16945200	16949999	2405	783	0	2.9504	0	AT3G46130
chr3	16945200	16949999	2405	783	0	2.9504	0	AT3G46140
chr3	16945200	16949999	2405	783	0	2.9504	0	AT3G46150
chr1	24036000	24036599	181	59	1.43222e-35	2.94683	5.31e-35	AT1G64680
chr3	8622200	8623199	328	107	1.92561e-62	2.94454	8.60974e-62	AT3G23880
chr5	3933800	3938199	2000	653	0	2.94201	0	AT5G12180
chr5	3933800	3938199	2000	653	0	2.94201	0	AT5G12170
chr1	12241600	12243399	995	325	7.42552e-184	2.94082	6.15021e-183	AT1G33770
chr1	9133000	9135199	1666	545	2.91462e-305	2.93634	3.90339e-304	AT1G26400
chr5	22437600	22446199	5340	1747	0	2.93614	0	AT5G55330
chr5	22437600	22446199	5340	1747	0	2.93614	0	AT5G55340
chr5	22437600	22446199	5340	1747	0	2.93614	0	AT5G55350
chr5	22437600	22446199	5340	1747	0	2.93614	0	AT5G55360
chr5	22437600	22446199	5340	1747	0	2.93614	0	AT5G55370
chr2	7395000	7395999	339	111	4.32927e-64	2.93363	1.96348e-63	AT2G17010
chr4	16227000	16232399	2936	962	0	2.93163	0	AT4G33860
chr4	12117400	12123199	2510	823	0	2.92956	0	AT4G23130
chr4	12117400	12123199	2510	823	0	2.92956	0	AT4G23140
chr4	6631800	6632399	198	65	2.76478e-38	2.92604	1.04781e-37	AT4G10770
chr4	9546200	9547799	731	240	1.06073e-134	2.92573	7.00393e-134	AT4G16960
chr3	2630800	2633199	1797	590	0	2.92566	0	AT3G08660
chr3	8382600	8393399	5549	1822	0	2.92546	0	AT3G23410
chr3	8382600	8393399	5549	1822	0	2.92546	0	AT3G23420
chr3	8382600	8393399	5549	1822	0	2.92546	0	AT3G23430
chr3	5497400	5499799	1373	451	1.89596e-250	2.9243	2.06834e-249	AT3G16220
chr1	22198600	22199399	207	68	7.05577e-40	2.92408	2.70286e-39	AT1G60190
chr5	26599800	26601799	626	206	2.58094e-115	2.91901	1.54838e-114	AT5G66640
chr3	6752600	6753399	392	129	3.71731e-73	2.91893	1.77561e-72	AT3G19480
chr5	3653000	3654399	714	235	4.01801e-131	2.91849	2.61462e-130	AT5G11440
chr1	25926800	25931599	2813	926	0	2.91801	0	AT1G68945
chr1	25926800	25931599	2813	926	0	2.91801	0	AT1G68950
chr1	25926800	25931599	2813	926	0	2.91801	0	AT1G68960
chr4	13885800	13887199	981	323	4.66626e-179	2.91739	3.78762e-178	AT4G27890
chr2	8695800	8696399	173	57	1.45436e-33	2.91541	5.30673e-33	AT2G20142
chr4	16451200	16452599	397	131	9.50006e-74	2.91103	4.55053e-73	AT4G34410
chr4	12125400	12129199	1584	523	3.56383e-286	2.90925	4.45139e-285	AT4G23150
chr4	14478800	14479999	554	183	9.5583e-102	2.90795	5.35052e-101	AT4G29450
chr4	15280000	15282199	1277	422	6.23656e-231	2.90674	6.31877e-230	AT4G31520
chr4	12949800	12950599	278	92	3.80337e-52	2.90259	1.58122e-51	AT4G25310
chr1	21901600	21911199	4777	1583	0	2.89869	0	AT1G59630
chr1	21901600	21911199	4777	1583	0	2.89869	0	AT1G59640
chr1	21901600	21911199	4777	1583	0	2.89869	0	AT1G59620
chr5	10400	11999	374	124	4.13768e-69	2.8972	1.93629e-68	AT5G01030
chr3	6404200	6407999	2752	913	0	2.89538	0	AT3G18610
chr2	19439200	19440199	467	155	1.57203e-85	2.8941	8.07891e-85	AT2G47370
chr1	1748200	1749199	512	170	1.79593e-93	2.893	9.6117e-93	AT1G05810
chr1	12448600	12451199	825	274	5.75274e-149	2.89222	4.04922e-148	AT1G34180
chr2	12628600	12629599	325	108	3.63616e-60	2.8906	1.60228e-59	AT2G29470
chr2	10372000	10373999	373	124	1.20364e-68	2.88945	5.608e-68	AT2G24380
chr2	10372000	10373999	373	124	1.20364e-68	2.88945	5.608e-68	AT2G24390
chr2	10372000	10373999	373	124	1.20364e-68	2.88945	5.608e-68	AT2G24370
chr3	2797000	2802799	2313	769	0	2.8892	0	AT3G09120
chr3	2797000	2802799	2313	769	0	2.8892	0	AT3G09130
chr3	2797000	2802799	2313	769	0	2.8892	0	AT3G09140
chr5	8855000	8859199	2413	804	0	2.8829	0	AT5G25440
chr5	8855000	8859199	2413	804	0	2.8829	0	AT5G25450
chr5	4380400	4382599	1076	359	4.47093e-192	2.87903	3.81797e-191	AT5G13600
chr2	12872200	12875999	1887	630	0	2.87713	0	AT2G30140
chr2	12872200	12875999	1887	630	0	2.87713	0	AT2G30150
chr2	14158600	14162199	1866	623	0	2.87708	0	AT2G33420
chr4	10346000	10349199	1526	510	1.57244e-270	2.87417	1.83008e-269	AT4G18870
chr4	10346000	10349199	1526	510	1.57244e-270	2.87417	1.83008e-269	AT4G18880
chr1	17814800	17815999	368	123	3.42329e-67	2.87389	1.57604e-66	AT1G48260
chr4	15558200	15559599	834	279	7.5741e-149	2.87137	5.32246e-148	AT4G32208
chr1	5136800	5137799	816	273	1.13022e-145	2.87115	7.77576e-145	AT1G14890
chr4	10231400	10232199	236	79	7.41715e-44	2.86954	2.91324e-43	AT4G18570
chr1	19113200	19115199	600	201	1.40914e-107	2.86737	8.15563e-107	AT1G51538
chr5	19345400	19347599	852	286	3.56325e-151	2.86155	2.52266e-150	AT5G47770
chr2	18791600	18792399	405	136	3.67835e-73	2.86051	1.75798e-72	AT2G45610
chr5	22460400	22462399	941	316	1.38858e-166	2.86042	1.07106e-165	AT5G55410
chr4	9741800	9744399	789	265	4.57091e-140	2.85995	3.0777e-139	AT4G17470
chr4	11441200	11441799	262	88	3.57933e-48	2.85987	1.45337e-47	AT4G21500
chr4	16387000	16388799	671	226	5.62168e-119	2.85195	3.44282e-118	AT4G34230
chr3	22610600	22611199	187	63	6.77355e-35	2.85121	2.4972e-34	AT3G61100
chr5	5229400	5233799	1683	567	2.95063e-294	2.85121	3.80815e-293	AT5G16020
chr5	5229400	5233799	1683	567	2.95063e-294	2.85121	3.80815e-293	AT5G16023
chr5	20830400	20831799	1251	422	5.57057e-219	2.84756	5.35163e-218	AT5G51250
chr1	19524400	19526799	1105	373	1.56765e-193	2.84565	1.34408e-192	AT1G52410
chr1	19524400	19526799	1105	373	1.56765e-193	2.84565	1.34408e-192	AT1G52415
chr1	29265200	29267799	1418	479	2.72653e-247	2.8436	2.94803e-246	AT1G77830
chr1	29912800	29914599	722	244	3.92513e-127	2.84234	2.50264e-126	AT1G79520
chr3	4346600	4347799	352	119	3.07751e-63	2.84134	1.38691e-62	AT3G13380
chr1	3284000	3286799	953	323	3.46023e-166	2.83412	2.65939e-165	AT1G10060
chr3	449600	450999	333	113	1.32872e-59	2.8307	5.83995e-59	AT3G02270
chr3	19716200	19717199	268	91	2.15722e-48	2.82892	8.77599e-48	AT3G53190
chr1	23443000	23447199	2369	805	0	2.82681	0	AT1G63210
chr1	27913200	27914399	615	209	1.04138e-107	2.82655	6.03124e-107	AT1G74220
chr2	9324800	9326399	750	255	1.10509e-130	2.8252	7.16377e-130	AT2G21880
chr1	18375800	18376599	438	149	2.59502e-77	2.82368	1.26793e-76	AT1G49640
chr1	26227000	26231399	2277	775	0	2.82221	0	AT1G69720
chr1	26227000	26231399	2277	775	0	2.82221	0	AT1G69730
chr4	14135600	14137999	1250	426	3.31265e-215	2.81857	3.12268e-214	AT4G28620
chr5	6281800	6287399	2271	774	0	2.81841	0	AT5G18840
chr5	6281800	6287399	2271	774	0	2.81841	0	AT5G18850
chr1	10125200	10126999	536	183	1.68131e-93	2.81347	9.00956e-93	AT1G29025
chr3	11246800	11247799	779	266	1.07622e-134	2.81309	7.10075e-134	AT3G29300
chr5	26443400	26444399	284	97	1.14491e-50	2.81238	4.72074e-50	AT5G66150
chr4	10190200	10191399	1013	346	2.78946e-174	2.8123	2.21572e-173	AT4G18450
chr3	16214400	16215999	389	133	2.17947e-68	2.80948	1.01325e-67	AT3G44660
chr1	22557400	22558799	678	232	3.62268e-117	2.80718	2.1903e-116	AT1G61190
chr4	17492400	17497599	2615	895	0	2.80658	0	AT4G37140
chr4	17492400	17497599	2615	895	0	2.80658	0	AT4G37150
chr4	17492400	17497599	2615	895	0	2.80658	0	AT4G37160
chr3	7456200	7457999	1157	396	5.26417e-198	2.80651	4.59659e-197	AT3G21250
chr3	7456200	7457999	1157	396	5.26417e-198	2.80651	4.59659e-197	AT3G21240
chr1	7203800	7204399	149	51	1.34436e-27	2.80636	4.67921e-27	AT1G20750
chr4	11392000	11393199	631	216	3.71859e-109	2.8061	2.17432e-108	AT4G21380
chr3	183400	184199	245	84	8.98434e-44	2.80166	3.52555e-43	AT3G01470
chr3	183400	184199	245	84	8.98434e-44	2.80166	3.52555e-43	AT3G01472
chr3	18612400	18613399	390	134	5.11136e-68	2.79568	2.36855e-67	AT3G50200
chr1	11259800	11261199	706	243	9.66393e-121	2.79079	5.97846e-120	AT1G31450
chr5	10316000	10318799	1173	404	1.19127e-198	2.78898	1.04555e-197	AT5G28340
chr2	19393200	19398599	1883	649	0	2.78698	0	AT2G47240
chr2	8599000	8606999	4284	1478	0	2.78422	0	AT2G19910
chr2	8599000	8606999	4284	1478	0	2.78422	0	AT2G19920
chr1	22226800	22228799	942	325	1.32927e-159	2.78417	9.8523e-159	AT1G60280
chr5	2125800	2129599	2005	692	0	2.78315	0	AT5G06839
chr5	2125800	2129599	2005	692	0	2.78315	0	AT5G06850
chr5	25087800	25091399	1144	395	5.24719e-193	2.782	4.48985e-192	AT5G62480
chr5	25087800	25091399	1144	395	5.24719e-193	2.782	4.48985e-192	AT5G62490
chr2	149200	149999	272	94	9.96139e-48	2.77952	4.03134e-47	AT2G01290
chr2	149200	149999	272	94	9.96139e-48	2.77952	4.03134e-47	AT2G01280
chr1	10537600	10540599	1209	418	2.26935e-203	2.77829	2.02721e-202	AT1G30040
chr5	1203400	1208599	3877	1341	0	2.77712	0	AT5G04310
chr1	11239800	11241599	659	228	6.36773e-112	2.77638	3.77244e-111	AT1G31380
chr3	17359000	17359999	679	235	3.54952e-115	2.77543	2.12797e-114	AT3G47150
chr3	17359000	17359999	679	235	3.54952e-115	2.77543	2.12797e-114	AT3G47160
chr5	20759400	20762399	1216	421	4.57782e-204	2.77447	4.11088e-203	AT5G51060
chr3	2700600	2702799	2224	770	0	2.77442	0	AT3G08870
chr3	19403000	19406399	2163	749	0	2.77398	0	AT3G52320
chr3	19403000	19406399	2163	749	0	2.77398	0	AT3G52330
chr1	27279600	27281599	800	278	2.44545e-134	2.76422	1.60725e-133	AT1G72460
chr4	6500000	6502599	647	225	5.24853e-109	2.76217	3.0647e-108	AT4G10520
chr1	23041800	23045199	1624	565	2.01184e-269	2.76099	2.32876e-268	AT1G62320
chr3	5271000	5271799	267	93	2.62591e-46	2.75776	1.05123e-45	AT3G15570
chr5	6603000	6606199	1484	517	7.17299e-246	2.75722	7.68754e-245	AT5G19560
chr1	9825400	9827799	1016	354	3.7866e-169	2.75688	2.95009e-168	AT1G28130
chr4	17298400	17300799	1024	357	2.73221e-170	2.75524	2.14036e-169	AT4G36700
chr2	8505200	8505599	129	45	1.67486e-23	2.75363	5.64751e-23	AT2G19700
chr3	20441600	20442399	212	74	3.98487e-37	2.7519	1.49494e-36	AT3G55150
chr2	11724200	11727599	2845	995	0	2.74655	0	AT2G27402
chr2	11724200	11727599	2845	995	0	2.74655	0	AT2G27410
chr2	11724200	11727599	2845	995	0	2.74655	0	AT2G27420
chr1	69800	71999	734	257	6.2549e-122	2.74341	3.90063e-121	AT1G01150
chr5	1079200	1081199	1399	490	7.12108e-230	2.74252	7.18934e-229	AT5G04000
chr5	1079200	1081199	1399	490	7.12108e-230	2.74252	7.18934e-229	AT5G04010
chr2	15686800	15687799	334	117	8.49299e-57	2.74213	3.64272e-56	AT2G37380
chr5	14852000	14854999	767	269	6.0623e-127	2.73887	3.85952e-126	AT5G37450
chr4	10405000	10405799	245	86	3.70528e-42	2.7365	1.44074e-41	AT4G19000
chr5	463200	465199	977	343	1.04325e-160	2.73608	7.78647e-160	AT5G02260
chr4	9330400	9331399	475	167	2.93148e-79	2.73215	1.45145e-78	AT4G16563
chr5	22869800	22874599	3664	1290	0	2.72831	0	AT5G56470
chr5	22869800	22874599	3664	1290	0	2.72831	0	AT5G56480
chr5	22869800	22874599	3664	1290	0	2.72831	0	AT5G56500
chr5	22869800	22874599	3664	1290	0	2.72831	0	AT5G56490
chr3	18172200	18175599	2240	790	0	2.72364	0	AT3G49030
chr3	16648000	16649999	717	253	1.24509e-117	2.72224	7.57623e-117	AT3G45390
chr1	653400	654599	606	214	1.0986e-99	2.72011	6.06612e-99	AT1G02900
chr5	25224200	25224999	512	181	1.83956e-84	2.71719	9.38596e-84	AT5G62820
chr4	8032200	8036599	2039	721	0	2.7165	0	AT4G13890
chr3	5032200	5032999	274	97	3.19182e-46	2.71336	1.27658e-45	AT3G14950
chr4	7598600	7599199	268	95	3.64164e-45	2.70981	1.44362e-44	AT4G13000
chr4	314400	314999	476	169	3.91892e-78	2.7055	1.92693e-77	AT4G00750
chr1	22291600	22293199	501	178	5.2031e-82	2.70362	2.61566e-81	AT1G60500
chr3	8413200	8414399	377	134	2.80556e-62	2.70249	1.25179e-61	AT3G23460
chr1	19787800	19788799	256	91	4.73825e-43	2.70226	1.85082e-42	AT1G53100
chr5	16034600	16035999	455	162	1.92105e-74	2.69789	9.24857e-74	AT5G40060
chr4	18547800	18549999	792	282	1.06573e-127	2.69776	6.81537e-127	AT4G40010
chr1	2744400	2745799	758	270	3.02216e-122	2.69671	1.89157e-121	AT1G08630
chr1	21345000	21346199	642	229	1.10056e-103	2.69295	6.23017e-103	AT1G57630
chr4	12131400	12138799	4067	1451	0	2.69237	0	AT4G23160
chr4	12131400	12138799	4067	1451	0	2.69237	0	AT4G23170
chr4	12131400	12138799	4067	1451	0	2.69237	0	AT4G23180
chr1	19346000	19348599	1939	692	1.53779e-307	2.69153	2.06922e-306	AT1G52030
chr1	22551400	22553199	493	176	4.32143e-80	2.69068	2.15088e-79	AT1G61180
chr4	10209000	10209799	302	108	7.3521e-50	2.68603	3.01977e-49	AT4G18500
chr4	10209000	10209799	302	108	7.3521e-50	2.68603	3.01977e-49	AT4G18501
chr4	5839800	5840599	265	95	7.29311e-44	2.67948	2.86585e-43	AT4G09160
chr5	9483600	9483799	92	33	1.14677e-16	2.67795	3.60335e-16	AT5G26950
chr3	18147800	18153399	3055	1097	0	2.67505	0	AT3G48950
chr3	18147800	18153399	3055	1097	0	2.67505	0	AT3G48960
chr3	18147800	18153399	3055	1097	0	2.67505	0	AT3G48970
chr2	8114800	8116999	1807	649	1.16171e-283	2.67449	1.43423e-282	AT2G18720
chr1	5187600	5189399	740	266	1.46199e-117	2.67226	8.87706e-117	AT1G15080
chr3	7387600	7396599	5024	1811	0	2.66477	0	AT3G21090
chr3	7387600	7396599	5024	1811	0	2.66477	0	AT3G21080
chr5	26392400	26394199	1170	422	2.84451e-183	2.66319	2.35141e-182	AT5G65980
chr1	13228600	13230199	1584	572	1.1674e-246	2.66003	1.25587e-245	AT1G35730
chr5	1528200	1528999	216	78	9.4346e-36	2.66003	3.50094e-35	AT5G05160
chr5	9229800	9230999	412	149	7.05021e-66	2.65607	3.22668e-65	AT5G26300
chr3	20745400	20750199	2057	744	0	2.65576	0	AT3G55930
chr3	20745400	20750199	2057	744	0	2.65576	0	AT3G55940
chr1	20838000	20838799	210	76	1.07209e-34	2.6542	3.94226e-34	AT1G55740
chr5	6143200	6143999	370	134	2.87683e-59	2.65231	1.26051e-58	AT5G18510
chr4	13750600	13751799	577	209	5.03412e-91	2.6519	2.6592e-90	AT4G27520
chr2	17920800	17921399	265	96	4.19893e-43	2.65157	1.64241e-42	AT2G43100
chr2	7044800	7049999	2032	737	0	2.6484	0	AT2G16270
chr4	9519200	9520199	306	111	2.69359e-49	2.64805	1.10211e-48	AT4G16920
chr2	12156200	12156599	135	49	5.32938e-23	2.64646	1.78785e-22	AT2G28410
chr5	25798800	25799399	165	60	1.56393e-27	2.64156	5.43901e-27	AT5G64540
chr4	13164200	13164799	217	79	2.00399e-35	2.63852	7.41374e-35	AT4G25910
chr2	9875000	9876199	346	126	4.62822e-55	2.63775	1.96239e-54	AT2G23180
chr3	5173600	5175599	1178	429	1.97673e-181	2.63764	1.61837e-180	AT3G15356
chr3	5173600	5175599	1178	429	1.97673e-181	2.63764	1.61837e-180	AT3G15359
chr3	11648400	11649199	252	92	1.42762e-40	2.63112	5.49348e-40	AT3G29770
chr1	8656800	8659399	597	218	8.75663e-93	2.63055	4.6631e-92	AT1G24420
chr1	8656800	8659399	597	218	8.75663e-93	2.63055	4.6631e-92	AT1G24430
chr1	605000	606799	966	353	2.31718e-148	2.62864	1.62165e-147	AT1G02770
chr5	10675200	10676799	539	197	7.01744e-84	2.62815	3.56981e-83	AT5G28646
chr2	9563600	9564599	372	136	1.27047e-58	2.62744	5.53826e-58	AT2G22500
chr3	17526200	17526999	227	83	1.10681e-36	2.62709	4.13948e-36	AT3G47560
chr3	1005600	1008799	1813	663	9.63481e-276	2.62671	1.14797e-274	AT3G03910
chr3	6210000	6210599	216	79	5.32648e-35	2.62636	1.96456e-34	AT3G18120
chr5	20168200	20169399	380	139	8.93116e-60	2.62601	3.92741e-59	AT5G49665
chr1	7816400	7821599	3838	1405	0	2.62396	0	AT1G22150
chr2	12625000	12625599	183	67	5.98538e-30	2.62364	2.12049e-29	AT2G29450
chr3	23399000	23402799	2419	886	0	2.62259	0	AT3G63350
chr3	23399000	23402799	2419	886	0	2.62259	0	AT3G63360
chr3	23399000	23402799	2419	886	0	2.62259	0	AT3G63370
chr3	10120200	10120599	131	48	4.82161e-22	2.62155	1.60176e-21	AT3G27330
chr4	14541000	14542399	668	245	9.99396e-103	2.61902	5.6165e-102	AT4G29690
chr1	12595000	12600999	4437	1628	0	2.61796	0	AT1G34460
chr1	22613800	22616399	994	365	2.75906e-151	2.6159	1.95494e-150	AT1G61310
chr2	7473200	7477399	1605	590	3.56977e-242	2.61307	3.75971e-241	AT2G17160
chr2	7473200	7477399	1605	590	3.56977e-242	2.61307	3.75971e-241	AT2G17170
chr2	7473200	7477399	1605	590	3.56977e-242	2.61307	3.75971e-241	AT2G17180
chr1	26566400	26572399	3237	1190	0	2.61291	0	AT1G70500
chr1	26566400	26572399	3237	1190	0	2.61291	0	AT1G70505
chr3	23438400	23438999	280	103	3.03502e-44	2.61125	1.19648e-43	AT3G63470
chr3	23142600	23144399	897	330	2.52543e-136	2.611	1.67401e-135	AT3G62570
chr5	24201600	24204399	1675	617	1.08139e-251	2.6077	1.18578e-250	AT5G60110
chr1	29712600	29716199	2044	755	5.00612e-305	2.60053	6.69392e-304	AT1G78990
chr1	29712600	29716199	2044	755	5.00612e-305	2.60053	6.69392e-304	AT1G78995
chr4	2441400	2442599	379	140	1.27307e-58	2.60039	5.54676e-58	AT4G04810
chr3	20173600	20174199	184	68	1.24202e-29	2.59918	4.38745e-29	AT3G54490
chr1	24609200	24610399	1296	479	3.47688e-194	2.59895	2.98704e-193	AT1G66110
chr2	13168400	13170199	933	345	2.0542e-140	2.59771	1.38533e-139	AT2G30940
chr1	21706400	21708199	916	339	1.07384e-137	2.59552	7.157e-137	AT1G58420
chr5	6515200	6516399	513	190	4.02228e-78	2.59353	1.97662e-77	AT5G19340
chr2	10265600	10266199	186	69	9.71115e-30	2.58936	3.43189e-29	AT2G24150
chr3	2600200	2600799	164	61	2.27472e-26	2.58251	7.8375e-26	AT3G08560
chr4	15613200	15614399	709	264	5.32572e-106	2.57971	3.05129e-105	AT4G32340
chr5	4068200	4071199	1230	458	5.4732e-182	2.57969	4.49393e-181	AT5G12880
chr5	4068200	4071199	1230	458	5.4732e-182	2.57969	4.49393e-181	AT5G12890
chr1	18411400	18412599	521	194	1.4874e-78	2.57967	7.34316e-78	AT1G49750
chr1	18814200	18815399	588	219	2.67235e-88	2.57906	1.39011e-87	AT1G50760
chr1	3539400	3544199	3012	1123	0	2.57634	0	AT1G10680
chr4	10021800	10026199	1947	726	9.00301e-286	2.57607	1.12124e-284	AT4G18050
chr5	15310600	15311799	544	203	1.33654e-81	2.57413	6.69918e-81	AT5G38310
chr3	2643000	2644599	878	328	6.84421e-130	2.57128	4.42333e-129	AT3G08700
chr4	8492200	8494599	848	317	2.1536e-125	2.56959	1.36193e-124	AT4G14780
chr1	22924400	22928199	1835	686	3.0944e-268	2.56945	3.57217e-267	AT1G62030
chr1	27208000	27209399	543	203	3.45073e-81	2.5694	1.72658e-80	AT1G72270
chr1	29407600	29410399	1561	584	2.78331e-228	2.56754	2.79018e-227	AT1G78160
chr5	25023400	25023799	128	48	8.80645e-21	2.56151	2.89845e-20	AT5G62310
chr1	30319000	30319999	381	143	2.71947e-57	2.55927	1.16993e-56	AT1G80660
chr3	370200	374799	1448	544	2.42607e-210	2.55681	2.23026e-209	AT3G02100
chr3	370200	374799	1448	544	2.42607e-210	2.55681	2.23026e-209	AT3G02110
chr1	2631000	2631799	441	166	1.35522e-65	2.55187	6.18586e-65	AT1G08340
chr5	8831800	8834399	866	326	2.15611e-126	2.55169	1.37165e-125	AT5G25410
chr5	8831800	8834399	866	326	2.15611e-126	2.55169	1.37165e-125	AT5G25415
chr3	3646800	3647399	231	87	1.91175e-35	2.55047	7.07556e-35	AT3G11570
chr3	5765800	5767799	577	218	1.68844e-84	2.54242	8.62006e-84	AT3G16880
chr4	14315200	14316199	267	101	2.68149e-40	2.53932	1.02998e-39	AT4G29050
chr1	7531600	7532399	277	105	1.44026e-41	2.53407	5.58747e-41	AT1G21510
chr5	18877000	18881599	2633	999	0	2.53171	0	AT5G46540
chr1	3596200	3596799	195	74	7.00661e-30	2.53123	2.48125e-29	AT1G10790
chr3	9195400	9196399	598	227	9.69066e-87	2.53048	5.00733e-86	AT3G25250
chr3	20590600	20592399	711	270	1.38644e-102	2.5295	7.78654e-102	AT3G55515
chr5	3182400	3183199	242	92	2.02202e-36	2.52671	7.54917e-36	AT5G10150
chr5	18867800	18868399	418	159	3.86596e-61	2.52527	1.71061e-60	AT5G46520
chr5	2134000	2136799	1125	428	2.80184e-160	2.52486	2.08756e-159	AT5G06870
chr5	2134000	2136799	1125	428	2.80184e-160	2.52486	2.08756e-159	AT5G06890
chr5	2134000	2136799	1125	428	2.80184e-160	2.52486	2.08756e-159	AT5G06900
chr3	7425600	7426399	265	101	1.74384e-39	2.5203	6.65626e-39	AT3G21180
chr3	16788800	16790399	435	166	3.69887e-63	2.51715	1.66167e-62	AT3G45730
chr3	3600	7799	3068	1171	0	2.51667	0	AT3G01010
chr3	3600	7799	3068	1171	0	2.51667	0	AT3G01015
chr3	3600	7799	3068	1171	0	2.51667	0	AT3G01020
chr3	3600	7799	3068	1171	0	2.51667	0	AT3G01030
chr4	625000	627199	1265	483	1.06218e-178	2.51577	8.58905e-178	AT4G01470
chr4	625000	627199	1265	483	1.06218e-178	2.51577	8.58905e-178	AT4G01480
chr4	9488600	9488999	165	63	2.33503e-25	2.51577	7.98723e-25	AT4G16860
chr1	6031400	6032799	309	118	1.70293e-45	2.51539	6.77912e-45	AT1G17540
chr5	2139400	2140199	343	131	3.12802e-50	2.51507	1.28727e-49	AT5G06905
chr1	27775400	27777999	701	268	6.16841e-100	2.51253	3.41484e-99	AT1G73860
chr3	3352000	3357599	3604	1380	0	2.50861	0	AT3G10710
chr3	3352000	3357599	3604	1380	0	2.50861	0	AT3G10720
chr4	12650000	12651199	598	229	2.32572e-85	2.50838	1.19379e-84	AT4G24480
chr5	16683400	16687599	1522	583	3.49999e-213	2.50769	3.26678e-212	AT5G41720
chr5	16683400	16687599	1522	583	3.49999e-213	2.50769	3.26678e-212	AT5G41730
chr1	20917400	20918399	696	267	1.28563e-98	2.50395	7.06681e-98	AT1G55928
chr2	966600	967799	464	178	1.4458e-66	2.50395	6.63839e-66	AT2G03200
chr1	8146400	8149399	1642	630	4.49851e-229	2.50358	4.52024e-228	AT1G23010
chr3	499000	502399	3360	1291	0	2.50001	0	AT3G02430
chr3	499000	502399	3360	1291	0	2.50001	0	AT3G02440
chr1	6738400	6742599	3489	1343	0	2.49547	0	AT1G19460
chr1	6738400	6742599	3489	1343	0	2.49547	0	AT1G19464
chr1	6738400	6742599	3489	1343	0	2.49547	0	AT1G19470
chr5	24328600	24335799	2740	1055	0	2.49474	0	AT5G60500
chr5	24328600	24335799	2740	1055	0	2.49474	0	AT5G60510
chr5	24328600	24335799	2740	1055	0	2.49474	0	AT5G60520
chr5	24328600	24335799	2740	1055	0	2.49474	0	AT5G60530
chr1	29484400	29485399	610	235	4.58094e-86	2.49339	2.36133e-85	AT1G78370
chr4	6018200	6019399	443	171	6.05561e-63	2.48849	2.71754e-62	AT4G09500
chr1	4045600	4049399	2124	820	4.36455e-292	2.4881	5.59909e-291	AT1G11980
chr1	4045600	4049399	2124	820	4.36455e-292	2.4881	5.59909e-291	AT1G11990
chr1	9410400	9411199	418	162	4.34131e-59	2.4785	1.90024e-58	AT1G27100
chr3	16319000	16319599	260	101	1.76153e-37	2.47275	6.63471e-37	AT3G44770
chr3	22192600	22194599	893	347	7.96023e-123	2.47201	4.99696e-122	AT3G60100
chr3	21759600	21759999	131	51	6.5864e-20	2.46734	2.1487e-19	AT3G58850
chr4	6447200	6447799	303	118	4.24292e-43	2.46654	1.65886e-42	AT4G10400
chr5	1877200	1878199	521	203	2.49208e-72	2.4653	1.1844e-71	AT5G06200
chr2	19066000	19067199	372	145	2.70947e-52	2.46435	1.12698e-51	AT2G46450
chr1	6142600	6143399	282	110	3.74435e-40	2.46255	1.43693e-39	AT1G17840
chr1	17793800	17795799	1551	605	7.22676e-210	2.46255	6.63633e-209	AT1G48190
chr1	25559400	25560399	287	112	8.62035e-41	2.46145	3.3231e-40	AT1G68190
chr3	3300000	3302999	1473	575	3.63867e-199	2.46072	3.20346e-198	AT3G10560
chr3	3300000	3302999	1473	575	3.63867e-199	2.46072	3.20346e-198	AT3G10570
chr4	16070000	16071599	630	246	1.34945e-86	2.45999	6.96861e-86	AT4G33370
chr5	19717400	19718199	315	123	1.70238e-44	2.45999	6.7236e-44	AT5G48620
chr5	26200000	26200199	105	41	2.69243e-16	2.45999	8.42903e-16	AT5G65560
chr1	24204200	24207799	1641	641	2.67598e-221	2.45911	2.59418e-220	AT1G65150
chr1	24204200	24207799	1641	641	2.67598e-221	2.45911	2.59418e-220	AT1G65160
chr2	844000	846599	1359	531	1.2624e-183	2.4584	1.04457e-182	AT2G02890
chr3	20193800	20194999	647	253	1.25886e-88	2.45647	6.57244e-88	AT3G54550
chr1	27991200	27991999	253	99	4.72689e-36	2.45478	1.75708e-35	AT1G74470
chr2	10212600	10215999	2289	897	1.0254e-305	2.45121	1.37759e-304	AT2G24000
chr2	10212600	10215999	2289	897	1.0254e-305	2.45121	1.37759e-304	AT2G24010
chr2	12536000	12536999	398	156	3.29812e-55	2.45068	1.40191e-54	AT2G29150
chr5	9208800	9210399	431	169	1.5189e-59	2.44973	6.66551e-59	AT5G26280
chr5	19307400	19307999	224	88	5.99416e-32	2.44508	2.15947e-31	AT5G47635
chr5	15444600	15446399	873	343	1.22888e-117	2.44483	7.48294e-117	AT5G38565
chr1	658400	666399	6821	2682	0	2.44297	0	AT1G02920
chr1	658400	666399	6821	2682	0	2.44297	0	AT1G02930
chr1	658400	666399	6821	2682	0	2.44297	0	AT1G02940
chr1	658400	666399	6821	2682	0	2.44297	0	AT1G02950
chr1	658400	666399	6821	2682	0	2.44297	0	AT1G02952
chr4	2819600	2821399	427	168	1.21886e-58	2.44144	5.31602e-58	AT4G05540
chr5	2076000	2081799	3353	1320	0	2.43999	0	AT5G06720
chr5	2076000	2081799	3353	1320	0	2.43999	0	AT5G06730
chr2	18176800	18178599	1204	474	1.21537e-160	2.43992	9.06325e-160	AT2G43890
chr2	18176800	18178599	1204	474	1.21537e-160	2.43992	9.06325e-160	AT2G43900
chr5	26034600	26035799	330	130	9.51981e-46	2.43836	3.7968e-45	AT5G65165
chr5	9712200	9714199	1228	484	1.96847e-163	2.43714	1.48874e-162	AT5G27510
chr4	17975800	17976799	431	170	6.88713e-59	2.43532	3.01148e-58	AT4G38390
chr1	30135400	30138199	1916	756	5.75629e-253	2.43445	6.32821e-252	AT1G80110
chr3	11447400	11448599	385	152	9.19304e-53	2.43302	3.835e-52	AT3G29630
chr3	20948600	20951799	923	366	4.77869e-122	2.42242	2.98441e-121	AT3G56530
chr3	20948600	20951799	923	366	4.77869e-122	2.42242	2.98441e-121	AT3G56540
chr1	23704600	23706199	804	319	1.61823e-106	2.42099	9.30262e-106	AT1G63860
chr1	218800	219599	262	104	2.78275e-36	2.41989	1.03712e-35	AT1G01600
chr1	12005000	12005399	141	56	1.58595e-20	2.41857	5.20175e-20	AT1G33110
chr2	15677000	15682999	2544	1012	0	2.41471	0	AT2G37370
chr5	5899200	5900799	372	148	2.51164e-50	2.4144	1.03511e-49	AT5G17850
chr2	13890000	13890599	196	78	1.40251e-27	2.41373	4.8796e-27	AT2G32750
[truncated: 449 more rows]

## Sheet: Group II
Supplementary File 3: Group I and Group II genes
SICER ein6-1een-1 H3K27me3 merge vs ein6-1 H3K27me3 merge
Group II genes
chromosome	domain start	domain end	ChIP (reads)	CONTROL (reads)	p-value	fold change	FDR threshold	gene name
chr5	2928200	2929799	598	82	2.18033e-291	7.169	1.68976e-288	AT5G09420
chr3	20890200	20891599	857	124	0	6.79408	0	AT3G56330
chr1	3612200	3613999	676	132	2.14789e-242	5.03436	1.40852e-239	AT1G10850
chr3	20987400	20988199	454	90	2.38454e-161	4.95889	1.12935e-158	AT3G56660
chr1	30049000	30049599	194	40	7.34642e-68	4.76775	1.25256e-65	AT1G79890
chr5	7951400	7952599	502	108	5.67437e-164	4.56932	3.02338e-161	AT5G23580
chr2	16941000	16941999	278	63	3.90221e-87	4.33786	9.50466e-85	AT2G40570
chr3	9295400	9297999	1176	281	0	4.11408	0	AT3G25585
chr5	18543600	18546799	1097	270	9.79217e-306	3.99406	8.34783e-303	AT5G45720
chr3	9679000	9680599	438	108	1.73289e-123	3.98678	6.71494e-121	AT3G26440
chr3	9679000	9680599	438	108	1.73289e-123	3.98678	6.71494e-121	AT3G26445
chr5	787400	792399	3042	796	0	3.7568	0	AT5G03280
chr1	3600	5599	1183	337	1.56931e-274	3.45085	1.11487e-271	AT1G01010
chr2	5753200	5754599	506	154	9.13389e-109	3.22999	2.59555e-106	AT2G13800
chr3	9396400	9397199	430	133	9.81421e-91	3.17825	2.46077e-88	AT3G25730
chr1	29504800	29507599	1087	342	8.34287e-220	3.12446	5.08021e-217	AT1G78420
chr1	22299800	22301199	302	96	5.1243e-62	3.09248	7.40418e-60	AT1G60525
chr1	22299800	22301199	302	96	5.1243e-62	3.09248	7.40418e-60	AT1G60530
chr5	19156800	19158799	581	191	2.96477e-111	2.9903	8.71541e-109	AT5G47160
chr5	19156800	19158799	581	191	2.96477e-111	2.9903	8.71541e-109	AT5G47170
chr1	4542400	4543399	461	154	1.14412e-86	2.94274	2.70934e-84	AT1G13260
chr2	15027000	15028199	520	180	3.71842e-92	2.8399	9.60591e-90	AT2G35742
chr2	2181000	2182199	452	160	1.36075e-77	2.77709	2.76201e-75	AT2G05760
chr5	21484000	21484999	437	157	2.68351e-73	2.73623	4.97324e-71	AT5G52990
chr5	1413400	1414599	358	129	3.39326e-60	2.72813	4.66573e-58	AT5G04860
chr2	12024200	12024999	293	106	2.22167e-49	2.71727	2.49207e-47	AT2G28200
chr5	16208400	16209599	355	133	6.34233e-56	2.62391	8.58228e-54	AT5G40470
chr4	5847600	5848599	228	86	2.43622e-36	2.6062	1.85436e-34	AT4G09180
chr1	229000	231999	1192	473	9.42006e-164	2.47735	4.72388e-161	AT1G01640
chr1	229000	231999	1192	473	9.42006e-164	2.47735	4.72388e-161	AT1G01630
chr4	11196600	11197999	510	203	4.32138e-71	2.46971	7.67496e-69	AT4G20920
chr4	13904600	13907199	1164	468	5.1665e-156	2.445	2.31813e-153	AT4G27940
chr5	2932200	2932799	266	109	3.29817e-36	2.39898	2.48822e-34	AT5G09430
chr2	12675200	12675999	242	102	2.04865e-31	2.33231	1.32309e-29	AT2G29650
chr3	16441000	16441999	326	138	3.51215e-41	2.32226	3.18522e-39	AT3G44980
chr1	812000	812999	314	133	1.05714e-39	2.32086	9.01213e-38	AT1G03300
chr3	1226000	1226999	305	130	3.73847e-38	2.30636	3.06446e-36	AT3G04550
chr5	13084600	13085199	196	84	4.78725e-25	2.29376	2.23013e-23	AT5G34871
chr1	3722800	3724199	527	226	1.95497e-63	2.29231	2.87347e-61	AT1G11130
chr1	3346600	3347399	257	114	5.44683e-30	2.21615	3.31673e-28	AT1G10200
chr4	14553800	14555199	360	161	2.09491e-40	2.1981	1.84115e-38	AT4G29720
chr1	8835400	8836399	253	114	1.32015e-28	2.18166	7.55319e-27	AT1G25211
chr2	10281800	10283599	765	350	3.98676e-79	2.14865	8.28955e-77	AT2G24180
chr3	5147400	5148199	419	194	3.10562e-43	2.12317	3.15183e-41	AT3G15300
chr4	14369200	14370399	506	235	2.23813e-51	2.11667	2.72572e-49	AT4G29140
chr4	945800	946999	1249	583	7.43702e-122	2.10603	2.64169e-119	AT4G02130
chr2	1860200	1860599	134	63	8.42812e-15	2.09091	1.7397e-13	AT2G05160
chr1	205200	205999	415	196	5.95797e-41	2.08144	5.34649e-39	AT1G01570
chr5	2695000	2697599	530	252	7.34964e-51	2.06751	8.70218e-49	AT5G08380
chr5	18963200	18964999	1285	622	8.60328e-115	2.03088	2.71641e-112	AT5G46730
chr4	6021600	6023199	427	208	4.15226e-39	2.01807	3.47039e-37	AT4G09510
chr2	15860600	15867999	4273	2099	0	2.00121	0	AT2G37880
chr2	15860600	15867999	4273	2099	0	2.00121	0	AT2G37890
chr2	15860600	15867999	4273	2099	0	2.00121	0	AT2G37900
