# Supplementary material for: Epigenetic silencing of a multifunctional plant stress regulator
Source: eLife. 2019 Aug 16;8:e47835. doi: 10.7554/eLife.47835 (PMC6739875; doi:10.7554/eLife.47835)
Supplement: Supplementary file 4. — Table displaying differentially enriched epigenome features in ein6-1 een-1 mutants. Epigenome feature differences were determined with SICER (H2A.Z, H3K4me3 and H2Aub) and methylpy (5mC). [file elife-47835-supp4.xlsx]

## Sheet: Supplementary File 4
Supplementary File 4: Differentially enriched epigenome features in ein6-1een-1 mutants
SICER; ein6-1een-1 H2A.Z merge vs een-1 H2A.Z merge
H2A.Z
chromosome	domain start	domain end	ChIP (reads)	CONTROL (reads)	p-value	fold change	FDR threshold	gene name
chr3	8977400	8977999	338	55	3.8256e-127	5.22983	1.79363e-123	AT3G24610
chr5	789600	793199	1525	358	0	3.6251	0	AT5G03280
chr1	28232200	28232599	163	76	9.49292e-13	1.82519	3.87022e-10	AT1G75220
chr5	787400	788799	670	322	4.85927e-42	1.77073	1.13913e-38	AT5G03280
chr5	18971200	18971999	408	199	2.65545e-25	1.74478	3.55717e-22	AT5G46750
chr2	795800	796399	317	158	7.6157e-19	1.7074	6.49203e-16	AT2G02795
chr2	795800	796399	317	158	7.6157e-19	1.7074	6.49203e-16	AT2G02800
chr1	290200	290999	271	137	1.05562e-15	1.68338	5.82269e-13	AT1G01790
chr3	9295400	9296399	514	267	1.62249e-25	1.63827	2.34063e-22	AT3G25585
chr3	21233600	21235999	1083	579	3.37974e-46	1.59178	9.0548e-43	AT3G57390
chr3	17031400	17031799	245	131	5.28413e-12	1.59158	1.86979e-09	AT3G46340
chr4	12237800	12238399	214	115	1.51847e-10	1.58361	3.39017e-08	AT4G23440
chr5	15726600	15727199	241	133	1.32192e-10	1.54205	3.02333e-08	AT5G39260
chr2	2359400	2359999	226	125	5.56117e-10	1.53862	1.10951e-07	AT2G06050
chr1	1193200	1194199	303	168	1.25358e-12	1.53485	5.00205e-10	AT1G04420
chr1	1193200	1194199	303	168	1.25358e-12	1.53485	5.00205e-10	AT1G04425
chr5	23216400	23218799	869	491	4.81054e-30	1.50616	8.20153e-27	AT5G57330
chr5	23216400	23218799	869	491	4.81054e-30	1.50616	8.20153e-27	AT5G57320
SICER; Ler H3K4me3 merge vs ein6-1een-1 H3K4me3 merge
H3K4me3
chromosome	domain start	domain end	ChIP (reads)	CONTROL (reads)	p-value	fold change	FDR threshold	gene name
chr5	23400800	23401399	125	16	1.98e-69	8.17171	1.86e-66	AT5G57760
chr5	23400800	23401399	125	16	1.98e-69	8.17171	1.86e-66	AT5G57770
chr5	22038400	22039199	254	37	1.23e-125	7.1805	4.61e-122	AT5G54270
chr4	10809800	10810799	616	107	1.97e-260	6.02171	1.48e-256	AT4G19950
chr3	17228600	17229399	148	29	2.85e-58	5.3381	1.86e-55	AT3G46780
chr1	22700000	22700999	270	57	5.31e-97	4.95463	1.14e-93	AT1G61520
chr1	6578400	6579199	215	55	9.65e-64	4.08882	6.9e-61	AT1G19050
chr1	10722200	10722799	116	31	7.25e-34	3.91398	1.39e-31	AT1G30380
chr5	18745600	18747199	452	121	2.2e-124	3.90729	6.59e-121	AT5G46240
chr4	6408000	6409199	342	92	3.18e-94	3.88831	5.97e-91	AT4G10340
chr5	6128000	6128999	313	89	7.02e-81	3.67855	9.58e-78	AT5G18470
chr1	18175000	18175999	272	82	1.3e-65	3.46959	1.03e-62	AT1G49130
chr4	6369000	6369599	146	47	2.15e-33	3.24921	4.04e-31	AT4G10240
chr4	11401000	11401799	138	45	3.75e-31	3.20767	6.19e-29	AT4G21400
chr2	18286400	18287599	236	77	1.54e-51	3.20586	6.99e-49	AT2G44230
chr1	614800	616199	413	137	2.84e-86	3.1532	4.26e-83	AT1G02800
chr5	17911000	17912399	244	83	3.64e-50	3.07492	1.51e-47	AT5G44440
chr1	6942800	6943599	188	64	3.68e-39	3.07256	9.53e-37	AT1G20020
chr3	5468600	5469599	189	65	8.72e-39	3.04138	2.14e-36	AT3G16130
chr3	5468600	5469599	189	65	8.72e-39	3.04138	2.14e-36	AT3G16140
chr4	5778800	5779399	171	59	3.74e-35	3.03156	8.26e-33	AT4G09010
chr5	18791800	18792799	266	92	3.61e-53	3.02424	1.87e-50	AT5G46330
chr4	12269400	12270599	387	135	2.9e-75	2.99847	3.35e-72	AT4G23510
chr5	2010200	2010999	251	91	7.03e-47	2.88506	2.57e-44	AT5G06570
chr2	17592200	17592799	116	43	3.67e-22	2.82171	3.16e-20	AT2G42220
chr1	24995400	24996199	166	62	2.18e-30	2.80052	3.4e-28	AT1G66970
chr4	11849800	11850399	125	47	3.34e-23	2.78186	3.13e-21	AT4G22490
chr1	3288000	3289399	239	90	3.52e-42	2.77765	1.03e-39	AT1G10070
chr2	9230600	9231399	180	69	1.92e-31	2.72864	3.2e-29	AT2G21560
chr1	24973600	24974799	257	99	1.49e-43	2.71532	4.48e-41	AT1G66940
chr4	7521400	7522199	191	74	1.17e-32	2.69975	2.06e-30	AT4G12800
chr5	7951600	7952599	478	186	1.33e-77	2.68805	1.67e-74	AT5G23580
chr1	22925200	22926599	310	121	6.42e-51	2.67978	2.75e-48	AT1G62030
chr3	3087800	3088599	152	60	1.14e-25	2.64981	1.35e-23	AT3G10010
chr2	15662800	15663799	168	67	1.16e-27	2.62275	1.55e-25	AT2G37300
chr3	11304000	11305199	190	76	7.76e-31	2.61495	1.27e-28	AT3G29410
chr2	15954800	15955399	212	85	5.23e-34	2.60879	1.02e-31	AT2G38110
chr2	389800	390399	153	62	9.94e-25	2.5812	1.04e-22	AT2G01860
chr2	389800	390399	153	62	9.94e-25	2.5812	1.04e-22	AT2G01870
chr3	9795000	9795999	246	100	3.53e-38	2.57311	8.53e-36	AT3G26650
chr5	4391200	4392399	467	190	3.05e-70	2.5709	3.05e-67	AT5G13630
chr3	9827800	9828599	158	65	8.02e-25	2.54253	8.59e-23	AT3G26740
chr3	21233600	21234599	439	181	1.27e-64	2.53693	9.49e-62	AT3G57390
chr3	14749400	14751999	991	414	2.55e-139	2.50378	1.28e-135	AT3G42660
chr2	14145600	14146399	131	55	3.04e-20	2.49133	2.18e-18	AT2G33380
chr5	9100800	9101599	338	143	5.17e-48	2.47231	1.99e-45	AT5G26040
chr3	22565600	22566799	539	232	9.63e-73	2.4301	1.03e-69	AT3G60980
chr1	22981000	22981799	181	78	6.72e-26	2.42721	8.07e-24	AT1G62190
chr1	13026400	13027199	218	94	1.05e-30	2.42578	1.69e-28	AT1G35420
chr1	25880200	25881599	683	295	6.49e-91	2.42171	1.08e-87	AT1G68840
chr4	13217600	13218399	338	146	3.39e-46	2.42151	1.18e-43	AT4G26070
chr3	7108200	7108999	155	67	2.27e-22	2.4198	2.01e-20	AT3G20380
chr1	29715400	29716199	143	62	1.08e-20	2.4125	8.22e-19	AT1G78995
chr2	10571400	10572599	241	105	4.59e-33	2.40077	8.51e-31	AT2G24800
chr1	20058200	20059599	397	174	2.26e-52	2.38651	1.09e-49	AT1G53720
chr5	625400	626399	203	89	7.06e-28	2.38577	9.72e-26	AT5G02760
chr3	22745600	22746199	114	50	1.38e-16	2.38483	6.89e-15	AT3G61470
chr1	11198600	11200199	356	157	1.2e-46	2.37177	4.29e-44	AT1G31310
chr1	21439800	21440599	189	86	2.48e-24	2.29872	2.55e-22	AT1G57980
chr1	16871600	16872599	292	133	2.6e-36	2.29643	6e-34	AT1G44575
chr5	19786800	19788199	466	213	3.6e-56	2.28838	2.16e-53	AT5G48800
chr1	11538600	11539799	223	102	5.01e-28	2.2868	6.97e-26	AT1G32080
chr5	18096800	18097599	188	86	5.76e-24	2.28656	5.76e-22	AT5G44820
chr1	25709800	25710799	219	101	4.07e-27	2.26801	5.18e-25	AT1G68520
chr1	7042400	7043399	472	219	3.93e-55	2.25435	2.27e-52	AT1G20340
chr4	7417200	7417799	129	60	1.4e-16	2.24885	6.97e-15	AT4G12510
chr5	26568600	26569599	341	159	4.6e-40	2.24326	1.25e-37	AT5G66570
chr2	5925200	5925799	183	86	3.58e-22	2.22574	3.1e-20	AT2G14080
chr1	4393200	4394399	327	154	1.01e-37	2.22101	2.4e-35	AT1G12900
chr1	25766000	25766999	299	141	1.37e-34	2.21807	2.93e-32	AT1G68620
chr1	16127400	16127999	110	52	5.31e-14	2.21265	2e-12	AT1G42970
chr3	16890400	16891199	165	78	5.78e-20	2.21265	4.01e-18	AT3G45950
chr2	14536400	14537199	135	64	1.27e-16	2.20636	6.4e-15	AT2G34490
chr1	228800	230199	543	259	1.83e-59	2.19292	1.25e-56	AT1G01630
chr3	9354000	9354599	112	54	1.11e-13	2.16944	4.01e-12	AT3G25690
chr2	19070400	19070999	132	64	1.39e-15	2.15733	6.28e-14	AT2G46455
chr3	23214400	23214999	109	53	3.79e-13	2.15116	1.27e-11	AT3G62750
chr3	17606600	17607199	111	54	2.44e-13	2.15007	8.48e-12	AT3G47750
chr3	9680200	9680799	123	60	1.75e-14	2.14426	7.08e-13	AT3G26445
chr1	2047800	2048999	385	188	1.06e-40	2.14203	2.93e-38	AT1G06680
chr4	16661400	16662399	524	256	1.65e-54	2.14099	8.84e-52	AT4G34990
chr5	23313600	23314399	294	146	1.85e-30	2.10629	2.92e-28	AT5G57570
chr3	5619600	5620799	457	227	4.42e-46	2.10578	1.47e-43	AT3G16520
chr1	753600	754199	220	110	5.43e-23	2.09196	4.97e-21	AT1G03130
chr2	17138000	17139199	326	163	5.04e-33	2.09196	9.23e-31	AT2G41100
chr4	7421000	7421599	120	60	1.77e-13	2.09196	6.2e-12	AT4G12520
chr5	14840000	14840799	248	124	1.21e-25	2.09196	1.41e-23	AT5G37415
chr5	14840000	14840799	248	124	1.21e-25	2.09196	1.41e-23	AT5G37420
chr1	16184000	16184799	223	112	4.79e-23	2.08262	4.43e-21	AT1G43040
chr1	28794000	28794799	159	80	5.74e-17	2.07888	2.98e-15	AT1G76720
chr2	17958200	17958799	206	104	3.31e-21	2.07184	2.67e-19	AT2G43200
chr2	332400	333399	182	92	6.3e-19	2.06922	3.95e-17	AT2G01755
chr2	332400	333399	182	92	6.3e-19	2.06922	3.95e-17	AT2G01760
chr4	6373000	6373799	193	98	9.54e-20	2.05994	6.47e-18	AT4G10265
chr4	18130200	18131199	359	183	1.44e-34	2.05195	3.04e-32	AT4G38860
chr1	28301000	28302599	603	308	3e-56	2.04781	1.87e-53	AT1G75410
chr4	13388400	13389599	252	129	1.13e-24	2.04331	1.17e-22	AT4G26520
chr4	2634400	2634999	197	101	1.11e-19	2.04018	7.48e-18	AT4G05120
chr4	1498200	1499799	335	172	7.29e-32	2.03723	1.24e-29	AT4G03400
chr1	19899600	19900999	513	264	2.43e-47	2.03253	9.11e-45	AT1G53340
chr1	18198200	18199199	448	231	1.95e-41	2.02856	5.53e-39	AT1G49200
chr5	23746600	23747399	290	150	2.13e-27	2.02222	2.73e-25	AT5G58800
chr4	18165000	18165599	137	71	5.6e-14	2.0183	2.1e-12	AT4G38970
chr2	14189000	14190399	782	407	5.33e-69	2.00972	4.7e-66	AT2G33500
chr3	21970400	21971199	190	99	2.28e-18	2.00743	1.37e-16	AT3G59440
chr1	10302800	10303199	90	47	1.06e-09	2.00294	2.22e-08	AT1G29430
chr1	23795000	23795799	269	141	8.87e-25	1.99552	9.37e-23	AT1G64100
chr1	23795000	23795799	269	141	8.87e-25	1.99552	9.37e-23	AT1G64105
chr5	2061200	2061999	219	115	1.77e-20	1.99191	1.31e-18	AT5G06690
chr5	8622000	8622399	129	68	8.68e-13	1.98428	2.77e-11	AT5G25040
chr5	4445400	4446199	256	135	2.41e-23	1.98348	2.27e-21	AT5G13770
chr4	17752600	17753799	238	126	1.2e-21	1.97574	9.83e-20	AT4G37770
chr2	14024800	14026799	321	170	1.98e-28	1.97505	2.83e-26	AT2G33060
chr2	14024800	14026799	321	170	1.98e-28	1.97505	2.83e-26	AT2G33051
chr3	6742400	6743199	132	70	7.28e-13	1.97242	2.34e-11	AT3G19440
chr5	7736800	7738399	232	124	1.13e-20	1.95699	8.5e-19	AT5G23060
chr5	23307200	23308399	333	178	9.59e-29	1.9568	1.43e-26	AT5G57560
chr5	5868200	5868999	151	81	4.75e-14	1.94991	1.8e-12	AT5G17780
chr5	18953000	18954799	833	447	7.56e-68	1.94922	6.3e-65	AT5G46710
chr1	27975200	27975799	112	61	1.47e-10	1.92048	3.55e-09	AT1G74430
chr3	8084600	8085399	214	117	3.4e-18	1.91316	1.99e-16	AT3G22840
chr3	16414200	16415199	426	233	4.33e-34	1.91239	8.56e-32	AT3G44940
chr1	27996000	27996599	148	81	3.59e-13	1.91117	1.21e-11	AT1G74490
chr4	14826000	14826999	206	113	1.9e-17	1.90683	1.04e-15	AT4G30280
chr1	16923400	16925199	676	371	2.65e-52	1.90588	1.24e-49	AT1G44810
chr4	18252000	18252999	354	195	3.6e-28	1.89885	5.05e-26	AT4G39190
chr1	29908600	29909399	303	167	2.2e-24	1.89779	2.28e-22	AT1G79500
chr1	29908600	29909399	303	167	2.2e-24	1.89779	2.28e-22	AT1G79510
chr5	208800	210199	603	333	4.01e-46	1.89407	1.37e-43	AT5G01530
chr1	3874400	3874999	119	66	1.23e-10	1.88593	3.01e-09	AT1G11530
chr5	21991400	21992599	205	114	8.74e-17	1.88093	4.46e-15	AT5G54190
chr2	17831600	17832799	266	148	3.86e-21	1.87993	3.07e-19	AT2G42850
chr5	19299800	19300399	131	73	2.2e-11	1.87703	5.9e-10	AT5G47600
chr3	8254600	8255799	649	362	3.87e-48	1.87525	1.53e-45	AT3G23150
chr3	6900400	6901199	190	106	1.41e-15	1.87487	6.35e-14	AT3G19850
chr3	8703200	8704199	426	238	3.22e-32	1.87221	5.62e-30	AT3G24100
chr2	6947200	6947799	127	71	5.21e-11	1.87098	1.33e-09	AT2G15960
chr3	21894200	21895199	279	156	8.69e-22	1.87069	7.24e-20	AT3G59220
chr1	7221400	7221999	118	66	2.36e-10	1.87008	5.45e-09	AT1G20790
chr1	2884400	2884999	121	68	1.9e-10	1.86123	4.49e-09	AT1G08980
chr5	25628800	25629599	288	162	4.53e-22	1.85952	3.89e-20	AT5G64040
chr5	3219800	3220599	222	125	1.94e-17	1.85766	1.05e-15	AT5G10260
chr2	7504800	7505399	142	80	7.47e-12	1.85661	2.14e-10	AT2G17260
chr2	1077000	1077999	295	167	3.57e-22	1.84769	3.12e-20	AT2G03550
chr1	19902400	19904399	514	293	2.47e-36	1.83492	5.79e-34	AT1G53345
chr1	19902400	19904399	514	293	2.47e-36	1.83492	5.79e-34	AT1G53350
chr5	21857000	21857999	342	195	7.05e-25	1.83449	7.67e-23	AT5G53830
chr1	28335800	28336599	284	162	5.47e-21	1.83369	4.27e-19	AT1G75490
chr1	1806800	1807599	205	117	1.08e-15	1.8327	4.96e-14	AT1G05950
chr2	15650200	15651199	219	125	1.26e-16	1.83255	6.38e-15	AT2G37280
chr1	18132600	18133599	217	124	1.93e-16	1.83046	9.41e-15	AT1G49010
chr5	19244200	19245599	299	171	7.84e-22	1.82893	6.61e-20	AT5G47440
chr4	8507400	8508199	160	92	1.92e-12	1.81909	5.91e-11	AT4G14819
chr4	8507400	8508199	160	92	1.92e-12	1.81909	5.91e-11	AT4G14820
chr3	21779600	21780599	306	177	1.32e-21	1.8083	1.08e-19	AT3G58930
chr5	8073200	8074199	292	169	1.12e-20	1.80725	8.48e-19	AT5G23920
chr4	5550400	5551199	259	150	1.54e-18	1.80606	9.36e-17	AT4G08685
chr5	21882000	21883399	371	215	1.3e-25	1.80492	1.51e-23	AT5G53900
chr4	7016200	7017799	364	211	3.76e-25	1.80444	4.21e-23	AT4G11610
chr5	9578200	9579199	281	163	7.5e-20	1.80319	5.14e-18	AT5G27220
chr5	15377400	15378399	293	170	1.34e-20	1.80277	1e-18	AT5G38410
chr5	4776800	4778999	679	394	6.6e-45	1.80259	2.15e-42	AT5G14780
chr5	506400	507399	360	209	8.64e-25	1.80169	9.2e-23	AT5G02370
chr5	506400	507399	360	209	8.64e-25	1.80169	9.2e-23	AT5G02380
chr5	14995800	14996399	196	114	2.37e-14	1.79835	9.43e-13	AT5G37750
chr1	3086200	3087799	596	348	5.74e-39	1.79139	1.43e-36	AT1G09540
chr5	22192600	22194399	798	466	2.11e-51	1.79118	9.33e-49	AT5G54630
chr3	4074400	4075599	255	149	7.72e-18	1.7901	4.35e-16	AT3G12820
chr1	5977400	5978199	213	125	4.74e-15	1.78235	2.02e-13	AT1G17420
chr4	15973400	15974599	281	165	3.5e-19	1.78133	2.27e-17	AT4G33110
chr4	7260600	7260999	126	74	1.13e-09	1.78099	2.36e-08	AT4G12120
chr4	14203200	14203999	194	114	7.8e-14	1.78	2.87e-12	AT4G28750
chr4	17800	18599	173	102	1.95e-12	1.77406	5.99e-11	AT4G00050
chr2	17135800	17136599	222	131	2.3e-15	1.77257	1.01e-13	AT2G41090
chr3	7507200	7508799	670	396	5.75e-42	1.76971	1.66e-39	AT3G21330
chr1	18625000	18626399	387	229	4.6e-25	1.76766	5.12e-23	AT1G50280
chr1	11532600	11533799	336	199	5.61e-22	1.76607	4.78e-20	AT1G32060
chr4	9557000	9557799	314	186	1.16e-20	1.76579	8.66e-19	AT4G16980
chr1	10319800	10323599	549	326	2.69e-34	1.76148	5.53e-32	AT1G29490
chr1	10319800	10323599	549	326	2.69e-34	1.76148	5.53e-32	AT1G29500
chr1	10319800	10323599	549	326	2.69e-34	1.76148	5.53e-32	AT1G29510
chr5	9657000	9657799	143	85	2.19e-10	1.7597	5.11e-09	AT5G27360
chr1	5267800	5269799	442	263	7.37e-28	1.75788	1.01e-25	AT1G15310
chr3	3196000	3197199	289	172	6.39e-19	1.75749	3.99e-17	AT3G10320
chr2	14544800	14546799	378	225	4.19e-24	1.75724	4.25e-22	AT2G34510
chr5	7861800	7862599	220	131	7.33e-15	1.7566	3.07e-13	AT5G23360
chr1	24257200	24258199	178	106	2.15e-12	1.75645	6.54e-11	AT1G65310
chr4	18124600	18126399	280	167	2.79e-18	1.75374	1.66e-16	AT4G38830
chr4	18124600	18126399	280	167	2.79e-18	1.75374	1.66e-16	AT4G38840
chr4	18124600	18126399	280	167	2.79e-18	1.75374	1.66e-16	AT4G38850
chr5	3241400	3242399	295	176	3.91e-19	1.7532	2.51e-17	AT5G10310
chr2	9786400	9787599	186	111	8.67e-13	1.75272	2.77e-11	AT2G22990
chr3	17905600	17906799	271	162	1.22e-17	1.74975	6.73e-16	AT3G48350
chr2	18524400	18524799	107	64	4.13e-08	1.74875	6.44e-07	AT2G44920
chr1	26631200	26632199	401	240	4.99e-25	1.74766	5.46e-23	AT1G70630
chr5	1279600	1280399	422	253	4.29e-26	1.74468	5.19e-24	AT5G04490
chr1	19454000	19455399	335	201	4.3e-21	1.7433	3.39e-19	AT1G52220
chr1	19454000	19455399	335	201	4.3e-21	1.7433	3.39e-19	AT1G52230
chr5	15261000	15263399	375	225	2.3e-23	1.7433	2.18e-21	AT5G38210
chr5	15261000	15263399	375	225	2.3e-23	1.7433	2.18e-21	AT5G38212
chr4	16635600	16636799	433	260	1.36e-26	1.74196	1.67e-24	AT4G34920
chr5	5176400	5177599	248	149	4.45e-16	1.74096	2.11e-14	AT5G15845
chr5	5176400	5177599	248	149	4.45e-16	1.74096	2.11e-14	AT5G15850
chr5	8794400	8797199	1738	1045	1.3e-99	1.73963	3.24e-96	AT5G25340
chr5	8794400	8797199	1738	1045	1.3e-99	1.73963	3.24e-96	AT5G25350
chr1	21791600	21792399	153	92	1.22e-10	1.73951	3e-09	AT1G58848
chr4	1440200	1440999	246	148	6.69e-16	1.73859	3.14e-14	AT4G03280
chr3	19255000	19255799	206	124	1.29e-13	1.73767	4.64e-12	AT3G51895
chr2	11229800	11230599	189	114	1.4e-12	1.73412	4.36e-11	AT2G26390
chr5	8079200	8079799	126	76	5.11e-09	1.73412	9.3e-08	AT5G23940
chr1	23082200	23084199	832	502	2.36e-48	1.73357	9.57e-46	AT1G62380
chr1	5088200	5088999	280	169	1.19e-17	1.73298	6.59e-16	AT1G14770
chr5	25400200	25401199	464	281	1.31e-27	1.72717	1.74e-25	AT5G63420
chr4	455800	456799	284	172	1.08e-17	1.72708	6e-16	AT4G01050
chr4	9304800	9305799	181	110	7.15e-12	1.72111	2.06e-10	AT4G16510
chr4	9304800	9305799	181	110	7.15e-12	1.72111	2.06e-10	AT4G16515
chr1	29993000	29993799	319	194	2.22e-19	1.71993	1.45e-17	AT1G79700
chr1	10375800	10377599	337	205	2.42e-20	1.71949	1.77e-18	AT1G29670
chr3	19393800	19395199	544	331	1.57e-31	1.71907	2.65e-29	AT3G52290
chr5	15957400	15958599	335	204	3.62e-20	1.71766	2.58e-18	AT5G39860
chr3	3512000	3513199	399	243	1.28e-23	1.71747	1.24e-21	AT3G11210
chr2	16130400	16130999	118	72	2.65e-08	1.71424	4.31e-07	AT2G38540
chr4	1003800	1005199	476	291	1.92e-27	1.71095	2.49e-25	AT4G02290
chr3	21076400	21077799	577	353	9.74e-33	1.70972	1.76e-30	AT3G56940
chr3	3533600	3534799	343	210	2.92e-20	1.70843	2.11e-18	AT3G11280
chr1	8172000	8173199	248	152	3.72e-15	1.7066	1.61e-13	AT1G23060
chr4	10325000	10325799	137	84	3.22e-09	1.70594	6.15e-08	AT4G18810
chr2	9875000	9875799	225	138	6.65e-14	1.7054	2.46e-12	AT2G23180
chr5	25017000	25018199	388	238	1.62e-22	1.70521	1.44e-20	AT5G62280
chr1	25493400	25494199	189	116	5.77e-12	1.70422	1.68e-10	AT1G68010
chr2	11995200	11995799	174	107	4.18e-11	1.70094	1.08e-09	AT2G28140
chr1	19935000	19936599	411	253	1.83e-23	1.6992	1.74e-21	AT1G53430
chr3	17569600	17570399	219	135	2.21e-13	1.69681	7.71e-12	AT3G47650
chr2	15863200	15863999	264	163	1.19e-15	1.6941	5.43e-14	AT2G37890
chr2	1333400	1334399	212	131	6.36e-13	1.69273	2.06e-11	AT2G04039
chr1	25471200	25472399	351	217	4.58e-20	1.69188	3.24e-18	AT1G67910
chr1	21707400	21707999	155	96	6.8e-10	1.68882	1.47e-08	AT1G58420
chr4	15946000	15946799	155	96	6.8e-10	1.68882	1.47e-08	AT4G33050
chr3	20909800	20910399	129	80	1.63e-08	1.68664	2.75e-07	AT3G56400
chr1	6852200	6852799	166	103	2.08e-10	1.68575	4.87e-09	AT1G19830
chr5	3550400	3551599	380	236	3.04e-21	1.6842	2.47e-19	AT5G11160
chr5	16942800	16943399	151	94	1.51e-09	1.68024	3.09e-08	AT5G42380
chr1	12180800	12182199	419	261	5.46e-23	1.67918	4.97e-21	AT1G33600
chr2	9864800	9866599	216	135	1.1e-12	1.67357	3.46e-11	AT2G23170
chr2	11892200	11892999	200	125	6.9e-12	1.67357	1.99e-10	AT2G27930
chr5	2995000	2995599	120	75	7.08e-08	1.67357	1.05e-06	AT5G09660
chr5	787400	789199	1025	641	1.99e-52	1.67259	9.93e-50	AT5G03280
chr2	9061000	9061799	139	87	8.49e-09	1.67116	1.5e-07	AT2G21140
chr1	8934200	8935599	361	226	9.07e-20	1.67079	6.19e-18	AT1G25440
chr1	1503000	1503999	356	223	1.74e-19	1.66981	1.16e-17	AT1G05190
chr1	16933600	16934799	523	328	1.5e-27	1.66783	1.97e-25	AT1G44830
chr2	2348000	2348399	140	88	9.7e-09	1.66406	1.7e-07	AT2G06025
chr3	7277600	7278199	130	82	3.65e-08	1.65826	5.77e-07	AT3G20810
chr1	19672800	19673599	187	118	6.44e-11	1.65761	1.63e-09	AT1G52830
chr5	19717400	19718199	244	154	1.18e-13	1.65726	4.27e-12	AT5G48620
chr2	15724200	15724999	144	91	8.48e-09	1.65517	1.5e-07	AT2G37450
chr3	5556800	5558799	525	332	6.94e-27	1.65403	8.67e-25	AT3G16370
chr3	5556800	5558799	525	332	6.94e-27	1.65403	8.67e-25	AT3G16380
chr5	23420200	23422599	895	566	2.57e-44	1.65398	8.05e-42	AT5G57800
chr4	8092800	8093399	158	100	1.98e-09	1.65265	3.94e-08	AT4G14010
chr1	24229200	24229799	134	85	3.18e-08	1.64895	5.08e-07	AT1G65230
chr2	11393600	11394199	134	85	3.18e-08	1.64895	5.08e-07	AT2G26740
chr2	14849400	14850999	610	387	1.48e-30	1.6487	2.37e-28	AT2G35260
chr4	13653400	13655799	1128	716	1.49e-54	1.64785	8.3e-52	AT4G27260
chr3	21445200	21446199	211	134	7.76e-12	1.64703	2.21e-10	AT3G57920
chr2	10736600	10737599	349	222	3.34e-18	1.64435	1.96e-16	AT2G25200
chr5	15380800	15381999	308	196	2.82e-16	1.64368	1.36e-14	AT5G38420
chr1	28328000	28328799	245	156	2.54e-13	1.64272	8.73e-12	AT1G75460
chr3	7194800	7195599	259	165	5.98e-14	1.64187	2.24e-12	AT3G20600
chr1	15977000	15978199	348	222	5.53e-18	1.63964	3.15e-16	AT1G42550
chr3	21926200	21926999	163	104	1.94e-09	1.63937	3.89e-08	AT3G59320
chr3	21926200	21926999	163	104	1.94e-09	1.63937	3.89e-08	AT3G59330
chr3	16892800	16893799	285	182	4.91e-15	1.63793	2.09e-13	AT3G45960
chr1	20802600	20804599	576	368	2.82e-28	1.63718	3.99e-26	AT1G55670
chr1	20802600	20804599	576	368	2.82e-28	1.63718	3.99e-26	AT1G55675
chr1	20802600	20804599	576	368	2.82e-28	1.63718	3.99e-26	AT1G55680
chr5	17466000	17466799	147	94	1.24e-08	1.63573	2.14e-07	AT5G43470
chr5	23446800	23447599	186	119	2.04e-10	1.63489	4.78e-09	AT5G57887
chr5	23446800	23447599	186	119	2.04e-10	1.63489	4.78e-09	AT5G57890
chr5	23446800	23447599	186	119	2.04e-10	1.63489	4.78e-09	AT5G57880
chr5	17761200	17761999	164	105	2.2e-09	1.63372	4.32e-08	AT5G44130
chr1	28377400	28378399	370	237	9.82e-19	1.63296	6.04e-17	AT1G75580
chr2	9222400	9224399	699	448	1.74e-33	1.63201	3.31e-31	AT2G21540
chr4	15986600	15988799	728	467	1.12e-34	1.63056	2.44e-32	AT4G33150
chr2	12675200	12676199	321	206	2.05e-16	1.6299	1e-14	AT2G29650
chr3	5213000	5214199	525	337	1.55e-25	1.62949	1.77e-23	AT3G15450
chr3	5213000	5214199	525	337	1.55e-25	1.62949	1.77e-23	AT3G15460
chr3	10960000	10960799	162	104	3.24e-09	1.62931	6.17e-08	AT3G28930
chr3	18224200	18224999	224	144	5.66e-12	1.62708	1.65e-10	AT3G49160
chr1	29703200	29704399	188	121	2.58e-10	1.62516	5.92e-09	AT1G78970
chr1	1104600	1105599	174	112	1.11e-09	1.625	2.31e-08	AT1G04180
chr4	447000	447799	295	190	4.62e-15	1.62402	1.98e-13	AT4G01026
chr3	10726600	10728199	368	238	4.85e-18	1.61731	2.8e-16	AT3G28620
chr2	16572400	16573599	402	260	1.61e-19	1.61724	1.08e-17	AT2G39730
chr1	25271200	25273599	742	480	2.99e-34	1.61691	6.06e-32	AT1G67460
chr1	25271200	25273599	742	480	2.99e-34	1.61691	6.06e-32	AT1G67470
chr5	19984600	19985799	443	287	3.53e-21	1.61452	2.82e-19	AT5G49300
chr5	20583400	20584199	196	127	1.9e-10	1.61427	4.5e-09	AT5G50570
chr5	16066200	16067599	364	236	1.03e-17	1.61329	5.76e-16	AT5G40170
chr3	23229800	23230399	137	89	8.57e-08	1.6101	1.26e-06	AT3G62820
chr3	18152000	18153399	309	201	3.64e-15	1.608	1.58e-13	AT3G48970
chr4	2452800	2453399	130	85	2.42e-07	1.59973	3.25e-06	AT4G04850
chr5	2622200	2622799	130	85	2.42e-07	1.59973	3.25e-06	AT5G08150
chr1	6688600	6690199	914	598	5.61e-40	1.5987	1.48e-37	AT1G19350
chr1	18011400	18013199	296	194	3.09e-14	1.59593	1.2e-12	AT1G48700
chr3	20709400	20710399	294	193	4.48e-14	1.59336	1.71e-12	AT3G55800
chr5	15949800	15950599	230	151	2.01e-11	1.59321	5.43e-10	AT5G39850
chr5	21872600	21873399	169	111	7.12e-09	1.59253	1.28e-07	AT5G53880
chr1	148600	149999	315	207	6.9e-15	1.59171	2.91e-13	AT1G01390
chr3	17526400	17528199	263	173	1.05e-12	1.59013	3.32e-11	AT3G47560
chr3	17526400	17528199	263	173	1.05e-12	1.59013	3.32e-11	AT3G47570
chr5	3245800	3246799	269	177	6.14e-13	1.58965	2e-11	AT5G10320
chr5	23077200	23078199	348	229	3.65e-16	1.58952	1.75e-14	AT5G57030
chr1	29146600	29147599	351	231	2.8e-16	1.58934	1.36e-14	AT1G77580
chr5	6800200	6800999	313	206	9.99e-15	1.58928	4.12e-13	AT5G20140
chr1	10052400	10052999	123	81	6.81e-07	1.58834	8.36e-06	AT1G28600
chr2	16128400	16129399	305	201	2.47e-14	1.58718	9.8e-13	AT2G38530
chr1	30383800	30384799	191	126	1.19e-09	1.58557	2.47e-08	AT1G80840
chr4	17090000	17090599	191	126	1.19e-09	1.58557	2.47e-08	AT4G36110
chr5	17864400	17865599	551	364	4.53e-24	1.58334	4.56e-22	AT5G44350
chr1	17014400	17015599	283	187	2.58e-13	1.58295	8.83e-12	AT1G45010
chr5	26588400	26589399	289	191	1.51e-13	1.58266	5.35e-12	AT5G66620
chr1	11137400	11138799	269	178	1.09e-12	1.58072	3.44e-11	AT1G31173
chr2	14309600	14310399	213	141	2e-10	1.58009	4.7e-09	AT2G33830
chr3	18434600	18435799	216	143	1.52e-10	1.57994	3.67e-09	AT3G49700
chr1	21902400	21902999	145	96	1.12e-07	1.57986	1.61e-06	AT1G59620
chr5	9497800	9498599	231	153	3.97e-11	1.57922	1.03e-09	AT5G27000
chr4	17671000	17672399	430	285	5.31e-19	1.57814	3.38e-17	AT4G37610
chr5	972600	973999	493	328	3.45e-21	1.57216	2.77e-19	AT5G03720
chr4	9261400	9262599	338	225	4.04e-15	1.57129	1.74e-13	AT4G16400
chr4	9261400	9262599	338	225	4.04e-15	1.57129	1.74e-13	AT4G16410
chr3	20853400	20853599	72	48	0.000135632	1.56897	0.000963943	AT3G56210
chr5	6470200	6470999	153	102	7.95e-08	1.56897	1.17e-06	AT5G19240
chr5	26884600	26885799	318	212	2.9e-14	1.56897	1.14e-12	AT5G67385
chr5	19309000	19310399	839	560	3.58e-34	1.5671	7.17e-32	AT5G47640
chr5	19309000	19310399	839	560	3.58e-34	1.5671	7.17e-32	AT5G47650
chr4	11640800	11641599	268	179	3.05e-12	1.56605	9.14e-11	AT4G21940
chr5	2949400	2950599	247	165	2e-11	1.5658	5.43e-10	AT5G09470
chr4	12567400	12568999	675	451	8.55e-28	1.56549	1.16e-25	AT4G24230
chr4	12567400	12568999	675	451	8.55e-28	1.56549	1.16e-25	AT4G24231
chr2	17854400	17855399	381	255	1.83e-16	1.56281	8.99e-15	AT2G42890
chr2	17854400	17855399	381	255	1.83e-16	1.56281	8.99e-15	AT2G42900
chr4	439000	439999	618	414	2.29e-25	1.56139	2.61e-23	AT4G01020
chr3	245400	246399	173	116	1.89e-08	1.55995	3.15e-07	AT3G01660
chr2	14982600	14983399	249	167	2.42e-11	1.55957	6.44e-10	AT2G35637
chr2	14982600	14983399	249	167	2.42e-11	1.55957	6.44e-10	AT2G35640
chr3	10589200	10590599	896	601	1.19e-35	1.5594	2.66e-33	AT3G28340
chr3	3707000	3708799	669	449	4.31e-27	1.55848	5.44e-25	AT3G11720
chr3	645600	646599	368	247	8.38e-16	1.55838	3.89e-14	AT3G02890
chr3	645600	646599	368	247	8.38e-16	1.55838	3.89e-14	AT3G02900
chr5	15965800	15967199	531	357	8.81e-22	1.55578	7.3e-20	AT5G39865
chr3	9930200	9931999	812	546	3.4e-32	1.55556	5.86e-30	AT3G26932
chr2	16940800	16941799	619	417	7.39e-25	1.55266	7.97e-23	AT2G40570
chr3	23327800	23328799	286	193	1.82e-12	1.55	5.61e-11	AT3G63140
chr2	7209400	7210199	163	110	6.77e-08	1.54995	1.01e-06	AT2G16630
chr1	11215000	11216199	441	298	4.44e-18	1.54791	2.59e-16	AT1G31330
chr1	9356000	9357199	469	317	4.41e-19	1.54752	2.82e-17	AT1G26960
chr5	6465800	6468599	571	386	8.84e-23	1.54729	7.94e-21	AT5G19220
chr5	6465800	6468599	571	386	8.84e-23	1.54729	7.94e-21	AT5G19221
chr5	6465800	6468599	571	386	8.84e-23	1.54729	7.94e-21	AT5G19230
chr3	20434800	20436399	312	211	2.55e-13	1.54666	8.74e-12	AT3G55130
chr5	24577400	24578199	180	122	2.09e-08	1.54325	3.46e-07	AT5G61090
chr3	6542400	6543599	298	202	1.06e-12	1.54308	3.36e-11	AT3G18960
chr3	6542400	6543599	298	202	1.06e-12	1.54308	3.36e-11	AT3G18970
chr3	6234600	6235999	323	219	1.36e-13	1.5427	4.86e-12	AT3G18200
chr1	24031800	24033599	606	411	9.6e-24	1.54225	9.48e-22	AT1G64670
chr2	13019400	13020199	230	156	3.3e-10	1.54215	7.44e-09	AT2G30570
chr5	16152200	16152999	339	230	3.9e-14	1.54168	1.5e-12	AT5G40380
chr2	10328000	10329799	436	296	1.4e-17	1.5407	7.72e-16	AT2G24270
chr4	17744000	17744599	162	110	1.07e-07	1.54044	1.53e-06	AT4G37760
chr1	29430200	29432199	742	504	1.95e-28	1.53991	2.81e-26	AT1G78230
chr2	7970600	7972199	747	508	1.78e-28	1.53808	2.59e-26	AT2G18340
chr2	7970600	7972199	747	508	1.78e-28	1.53808	2.59e-26	AT2G18350
chr3	22951400	22952799	613	417	1.04e-23	1.53761	1.02e-21	AT3G61970
chr2	13799000	13799999	413	281	1.29e-16	1.53733	6.48e-15	AT2G32510
chr5	20744400	20745399	288	196	3.7e-12	1.53695	1.1e-10	AT5G51010
chr5	20744400	20745399	288	196	3.7e-12	1.53695	1.1e-10	AT5G51020
chr3	22393800	22394999	429	292	3.71e-17	1.53673	1.95e-15	AT3G60580
chr5	23903800	23904599	238	162	2.29e-10	1.53668	5.32e-09	AT5G59250
chr1	25048000	25049199	329	224	1.35e-13	1.53628	4.84e-12	AT1G67090
chr2	12666800	12667799	271	185	2.02e-11	1.53222	5.44e-10	AT2G29628
chr2	12666800	12667799	271	185	2.02e-11	1.53222	5.44e-10	AT2G29630
chr1	25720000	25720599	123	84	3.73e-06	1.53161	3.91e-05	AT1G68540
chr3	7323600	7324799	470	321	2.32e-18	1.53149	1.39e-16	AT3G20898
chr3	7323600	7324799	470	321	2.32e-18	1.53149	1.39e-16	AT3G20900
chr2	7631000	7631999	407	278	3.7e-16	1.53134	1.76e-14	AT2G17540
chr1	24036000	24037199	439	300	3.05e-17	1.53062	1.62e-15	AT1G64680
chr4	16676200	16677199	155	106	2.88e-07	1.5295	3.81e-06	AT4G35030
chr5	20616600	20617599	229	157	8.7e-10	1.52566	1.84e-08	AT5G50670
chr3	18303200	18304399	185	127	3.22e-08	1.52367	5.13e-07	AT3G49360
chr1	2029800	2030599	179	123	5.54e-08	1.5222	8.39e-07	AT1G06630
chr1	17634800	17635599	470	323	6.46e-18	1.52201	3.67e-16	AT1G47870
chr3	8459400	8460799	189	130	2.67e-08	1.52069	4.34e-07	AT3G23570
chr3	8459400	8460799	189	130	2.67e-08	1.52069	4.34e-07	AT3G23580
chr3	22048800	22049599	157	108	3.41e-07	1.52054	4.47e-06	AT3G59690
chr3	22064800	22065999	359	247	4.41e-14	1.52027	1.68e-12	AT3G59730
chr1	9259600	9260999	520	358	1.8e-19	1.5193	1.19e-17	AT1G26770
chr5	4170600	4171799	334	230	3.43e-13	1.51894	1.16e-11	AT5G13130
chr5	4170600	4171799	334	230	3.43e-13	1.51894	1.16e-11	AT5G13140
chr3	18586000	18587199	440	303	9.21e-17	1.51891	4.68e-15	AT3G50120
chr1	8907800	8909199	845	582	2.62e-30	1.51865	4.05e-28	AT1G25390
chr1	19783400	19784399	225	155	1.76e-09	1.51836	3.55e-08	AT1G53090
chr4	2350400	2351999	688	474	4.93e-25	1.51821	5.44e-23	AT4G04640
chr1	2365600	2366599	369	255	3.56e-14	1.51359	1.38e-12	AT1G07650
chr5	23009000	23009799	246	170	4.46e-10	1.51359	9.88e-09	AT5G56880
chr4	18427400	18428399	269	186	8.02e-11	1.51273	1.99e-09	AT4G39710
chr2	16291400	16292799	449	311	1.13e-16	1.51011	5.74e-15	AT2G39010
chr5	6225800	6227799	1136	787	4.96e-39	1.50982	1.26e-36	AT5G18670
chr1	1930000	1931999	303	210	7.58e-12	1.5092	2.16e-10	AT1G06310
chr1	1930000	1931999	303	210	7.58e-12	1.5092	2.16e-10	AT1G06320
chr1	1930000	1931999	303	210	7.58e-12	1.5092	2.16e-10	AT1G06330
chr1	19781600	19781999	88	61	0.000112493	1.50895	0.000817701	AT1G53080
chr1	18542000	18543799	723	502	2.3e-25	1.50646	2.59e-23	AT1G50040
chr3	9295200	9296199	519	361	1.22e-18	1.50378	7.44e-17	AT3G25585
chr1	4384400	4385999	585	407	9.75e-21	1.50343	7.5e-19	AT1G12860
chr1	25559200	25559999	171	119	2.26e-07	1.50304	3.06e-06	AT1G68190
chr1	26152800	26153999	237	165	1.65e-09	1.50241	3.36e-08	AT1G69550
chr4	5839600	5841399	1014	706	2.53e-34	1.5023	5.27e-32	AT4G09160
chr1	2703200	2704199	191	133	5.23e-08	1.50212	7.95e-07	AT1G08540
chr4	15393000	15394399	313	218	6.04e-12	1.50179	1.75e-10	AT4G31820
chr1	18549600	18549999	122	85	9.81e-06	1.50129	9.41e-05	AT1G50055
chr2	10281800	10282999	864	602	1.83e-29	1.5012	2.77e-27	AT2G24180
chr3	17388000	17388799	208	145	1.59e-08	1.50044	2.69e-07	AT3G47220
SICER; ein6-1een-1 H2Aub merge vs Ler H2Aub merge
H2Aub
chromosome	domain start	domain end	ChIP (reads)	CONTROL (reads)	p-value	fold change	FDR threshold	gene name
chr1	2600	4199	85	58	0.00150636	1.39184	0.00846243	AT1G01010
chr3	8977400	8978199	129	12	8.94423e-83	10.2096	1.11096e-78	AT3G24610
chr2	7700600	7701199	53	9	2.1961e-23	5.59285	7.79364e-21	AT2G17723
chr3	10409200	10410599	124	24	1.49245e-45	4.90693	3.70753e-42	AT3G28007
chr3	16617600	16617799	30	6	1.79113e-12	4.74864	7.36677e-11	AT3G45290
chr4	6062600	6063199	84	20	1.04134e-25	3.98886	4.79053e-23	AT4G09587
chr1	20039600	20040399	60	15	4.67903e-18	3.79891	5.43161e-16	AT1G53683
chr5	16660200	16660799	52	13	5.97994e-16	3.79891	5.05285e-14	AT5G41663
chr5	4238800	4239199	43	11	3.02223e-13	3.71258	1.48965e-11	AT5G13250
chr4	8884000	8884599	54	14	7.85511e-16	3.66324	6.37702e-14	AT4G15560
chr1	3561600	3562599	76	20	5.40138e-21	3.60897	1.11817e-18	AT1G10710
chr1	3561600	3562599	76	20	5.40138e-21	3.60897	1.11817e-18	AT1G10717
chr3	16150800	16151399	52	14	1.08769e-14	3.52756	6.62262e-13	AT3G44560
chr3	5861400	5862599	105	29	1.63469e-26	3.43867	8.82805e-24	AT3G17185
chr2	520400	521399	97	27	1.96883e-24	3.41199	7.88867e-22	AT2G02080
chr5	791400	792999	161	46	1.05562e-37	3.32405	1.63897e-34	AT5G03280
chr4	11375000	11375399	50	15	1.694e-12	3.16576	6.99043e-11	AT4G21362
chr5	18977000	18980199	392	119	4.2438e-81	3.12852	2.63561e-77	AT5G46770
chr5	18977000	18980199	392	119	4.2438e-81	3.12852	2.63561e-77	AT5G46780
chr1	18237800	18238399	68	21	1.2768e-15	3.07531	9.85037e-14	AT1G49310
chr3	6259200	6260799	100	31	8.06251e-22	3.06364	1.92585e-19	AT3G18260
chr5	796600	796999	45	14	5.90778e-11	3.0527	1.79415e-09	AT5G03300
chr2	385200	385599	48	15	1.76148e-11	3.03913	5.99433e-10	AT2G01850
chr5	22895800	22896599	76	24	1.07948e-16	3.00747	1.05162e-14	AT5G56550
chr5	7318000	7318999	79	25	3.23542e-17	3.00114	3.46441e-15	AT5G22090
chr1	19279600	19280199	60	19	1.39384e-13	2.99914	7.33599e-12	AT1G51900
chr3	17496400	17496999	63	20	4.15966e-14	2.99165	2.32735e-12	AT3G47480
chr5	26350800	26351999	91	29	2.61375e-19	2.98018	4.00807e-17	AT5G65870
chr1	11718000	11719999	168	54	2.58711e-33	2.95471	2.92132e-30	AT1G32450
chr4	7326000	7326599	61	20	3.83874e-13	2.89667	1.81989e-11	AT4G12350
chr3	7464600	7465999	91	30	2.09793e-18	2.88084	2.55474e-16	AT3G21260
chr3	21510400	21511199	69	23	2.96952e-14	2.84919	1.71556e-12	AT3G58080
chr5	10649000	10649999	99	33	1.63335e-19	2.84919	2.56808e-17	AT5G28640
chr4	7368200	7369399	80	27	6.73773e-16	2.81401	5.61673e-14	AT4G12430
chr4	7368200	7369399	80	27	6.73773e-16	2.81401	5.61673e-14	AT4G12432
chr2	13732200	13732999	103	35	1.20671e-19	2.79492	1.97219e-17	AT2G32340
chr1	3028800	3029399	50	17	1.29408e-10	2.79332	3.66146e-09	AT1G09380
chr1	8029200	8029999	88	30	5.10085e-17	2.78587	5.32417e-15	AT1G22700
chr2	8278800	8279799	79	27	1.93205e-15	2.77884	1.45003e-13	AT2G19110
chr1	8395000	8395999	105	36	1.02283e-19	2.77004	1.76453e-17	AT1G23730
chr2	9610000	9610599	58	20	9.56018e-12	2.75421	3.44194e-10	AT2G22620
chr1	18128600	18130399	164	57	6.45729e-29	2.73255	5.01287e-26	AT1G49005
chr2	18600800	18601799	69	24	2.08409e-13	2.73047	1.0523e-11	AT2G45110
chr3	7541400	7542199	77	27	1.53121e-14	2.70849	9.14385e-13	AT3G21420
chr5	20391200	20391799	54	19	9.14392e-11	2.69923	2.68503e-09	AT5G50130
chr2	12978000	12978999	159	56	1.62204e-27	2.69655	1.00737e-24	AT2G30460
chr3	12167400	12168799	105	37	6.61311e-19	2.69518	9.0764e-17	AT3G30580
chr2	6303800	6304399	51	18	3.09801e-10	2.6909	8.2223e-09	AT2G14720
chr3	1448600	1450999	130	46	9.7778e-23	2.68402	2.9622e-20	AT3G05155
chr1	29407600	29408399	70	25	4.76629e-13	2.65924	2.20903e-11	AT1G78160
chr1	1538800	1539799	89	32	7.47854e-16	2.64143	6.11124e-14	AT1G05290
chr1	5834200	5836199	139	50	1.5869e-23	2.64025	5.79733e-21	AT1G17060
chr3	13529400	13529999	50	18	8.58819e-10	2.63814	2.13775e-08	AT3G32980
chr5	18518000	18518599	61	22	1.81049e-11	2.63334	6.12755e-10	AT5G45650
chr4	14693200	14694799	130	47	5.78009e-22	2.62691	1.40773e-19	AT4G30064
chr5	278800	279399	63	23	1.45718e-11	2.60143	5.06993e-10	AT5G01734
chr1	1905800	1906399	68	25	3.47406e-12	2.58326	1.34848e-10	AT1G06225
chr2	13299800	13300999	65	24	1.16173e-11	2.57218	4.12281e-10	AT2G31215
chr5	20133200	20134599	86	32	1.40554e-14	2.5524	8.43389e-13	AT5G49615
chr5	787400	788399	142	53	1.46058e-22	2.54456	3.85996e-20	AT5G03280
chr1	17351200	17351599	40	15	9.03474e-08	2.53261	1.49428e-06	AT1G47330
chr3	23241600	23242199	72	27	2.16881e-12	2.53261	8.68994e-11	AT3G62860
chr4	12412600	12414799	205	77	3.07354e-31	2.5285	2.93665e-28	AT4G23870
chr1	3530400	3531799	93	35	2.61942e-15	2.52356	1.85919e-13	AT1G10657
chr4	18413600	18413999	53	20	1.45574e-09	2.51678	3.45071e-08	AT4G39675
chr1	16923600	16925399	225	85	1.01115e-33	2.51399	1.25595e-30	AT1G44810
chr3	8264200	8264799	60	23	2.63774e-10	2.47755	7.13798e-09	AT3G23165
chr1	19459000	19459799	73	28	4.34958e-12	2.47608	1.67264e-10	AT1G52240
chr5	22315000	22316599	80	31	7.83446e-13	2.45091	3.43858e-11	AT5G54980
chr5	25977800	25978399	72	28	1.10105e-11	2.44216	3.94125e-10	AT5G65040
chr5	3283200	3283999	82	32	5.99782e-13	2.43368	2.67501e-11	AT5G10450
chr2	6893400	6894799	156	61	1.18977e-22	2.42881	3.43677e-20	AT2G15830
chr3	8881200	8881799	69	27	3.61444e-11	2.42708	1.16308e-09	AT3G24450
chr3	9008000	9009999	245	96	3.54448e-34	2.42379	4.89178e-31	AT3G24670
chr5	3244400	3244799	43	17	1.39116e-07	2.40226	2.19006e-06	AT5G10320
chr4	7613200	7613999	101	40	4.43758e-15	2.39807	3.01198e-13	AT4G13040
chr5	7695400	7696599	111	44	2.43789e-16	2.39591	2.17849e-14	AT5G23000
chr3	5961200	5962199	68	27	8.98216e-11	2.39191	2.65006e-09	AT3G17420
chr1	12213200	12214199	65	26	2.9287e-10	2.37432	7.80631e-09	AT1G33700
chr3	2215600	2216599	137	55	3.18649e-19	2.36569	4.82675e-17	AT3G07010
chr2	11213200	11214599	171	69	3.0787e-23	2.35368	1.00633e-20	AT2G26330
chr5	1234600	1236999	173	70	2.30791e-23	2.34719	7.96293e-21	AT5G04380
chr2	6947200	6947799	74	30	3.81621e-11	2.34266	1.21541e-09	AT2G15960
chr3	22360800	22362599	192	78	1.70459e-25	2.33779	7.56166e-23	AT3G60520
chr2	9801800	9802999	81	33	6.61631e-12	2.33115	2.43861e-10	AT2G23010
chr5	4828800	4830399	161	66	2.31448e-21	2.31676	4.87257e-19	AT5G14930
chr3	17624600	17625399	68	28	3.95091e-10	2.30648	1.03751e-08	AT3G47780
chr3	16322400	16323199	89	37	2.00891e-12	2.28448	8.15447e-11	AT3G44780
chr1	26220200	26221599	103	43	5.98675e-14	2.27493	3.24723e-12	AT1G69700
chr5	1230600	1231799	91	38	1.48322e-12	2.27435	6.16155e-11	AT5G04370
chr1	23923600	23924199	79	33	3.70334e-11	2.27359	1.18861e-09	AT1G64405
chr1	6757000	6757999	93	39	1.09308e-12	2.26474	4.65768e-11	AT1G19510
chr4	8821600	8822199	81	34	2.72754e-11	2.26259	9.01032e-10	AT4G15417
chr3	17590600	17591799	114	48	5.61614e-15	2.25561	3.75044e-13	AT3G47710
chr2	9728600	9729599	128	54	1.68375e-16	2.25121	1.56073e-14	AT2G22840
chr2	7265800	7267999	194	82	7.9774e-24	2.24692	3.09648e-21	AT2G16730
chr2	7265800	7267999	194	82	7.9774e-24	2.24692	3.09648e-21	AT2G16740
chr3	15655400	15655999	52	22	7.65031e-08	2.24481	1.28152e-06	AT3G43790
chr4	219400	219999	52	22	7.65031e-08	2.24481	1.28152e-06	AT4G00480
chr1	22930000	22931399	118	50	3.03e-15	2.24136	2.13839e-13	AT1G62035
chr5	19749600	19750199	59	25	1.28735e-08	2.24136	2.5341e-07	AT5G48700
chr2	18701600	18701999	40	17	2.01707e-06	2.23466	2.49666e-05	AT2G45380
chr5	7686400	7686799	40	17	2.01707e-06	2.23466	2.49666e-05	AT5G22970
chr1	8544200	8546599	162	69	6.04936e-20	2.2298	1.10499e-17	AT1G24148
chr4	12828000	12828799	68	29	1.59229e-09	2.22695	3.73167e-08	AT4G24960
chr3	411000	411599	82	35	4.61041e-11	2.22508	1.43165e-09	AT3G02210
chr3	8261000	8261599	56	24	4.08069e-08	2.21603	7.26163e-07	AT3G23160
chr4	5149800	5150799	93	40	4.20017e-12	2.20812	1.6202e-10	AT4G08150
chr1	27760200	27760799	53	23	1.2874e-07	2.18851	2.05801e-06	AT1G73830
chr4	7038400	7038999	71	31	1.91373e-09	2.17519	4.4142e-08	AT4G11655
chr1	2908400	2910399	128	56	2.2993e-15	2.17081	1.66044e-13	AT1G09030
chr1	18011200	18013199	134	59	8.7587e-16	2.15701	7.0644e-14	AT1G48698
chr1	18011200	18013199	134	59	8.7587e-16	2.15701	7.0644e-14	AT1G48700
chr4	13906400	13907399	109	48	3.24609e-13	2.15668	1.57499e-11	AT4G27940
chr5	23286400	23287599	143	63	1.0993e-16	2.15573	1.05848e-14	AT5G57500
chr5	25897600	25899399	102	45	1.88782e-12	2.15272	7.71336e-11	AT5G64770
chr3	242600	243599	77	34	7.23751e-10	2.15086	1.83276e-08	AT3G01650
chr5	734000	734599	77	34	7.23751e-10	2.15086	1.83276e-08	AT5G03120
chr3	22117400	22118199	86	38	8.90379e-11	2.14939	2.63319e-09	AT3G59870
chr1	24522400	24524199	147	65	5.76101e-17	2.14785	5.91385e-15	AT1G65910
chr1	29343400	29343799	61	27	3.50917e-08	2.14568	6.30788e-07	AT1G78030
chr1	18181200	18182399	99	44	5.73479e-12	2.13689	2.14877e-10	AT1G49160
chr3	20196200	20196799	65	29	1.81819e-08	2.1287	3.45846e-07	AT3G54560
chr5	789600	790399	56	25	1.50513e-07	2.12739	2.35753e-06	AT5G03280
chr1	29306200	29307399	94	42	2.40869e-11	2.12558	8.02101e-10	AT1G77950
chr3	2843200	2844399	85	38	1.95399e-10	2.12439	5.40546e-09	AT3G09260
chr2	2083200	2084799	96	43	1.7343e-11	2.12032	5.93437e-10	AT2G05630
chr5	21872200	21873999	96	43	1.7343e-11	2.12032	5.93437e-10	AT5G53880
chr5	4150200	4152399	183	82	4.89274e-20	2.11952	9.20798e-18	AT5G13080
chr1	24709400	24709799	58	26	1.08056e-07	2.11863	1.76832e-06	AT1G66280
chr1	7661400	7662599	136	61	2.15985e-15	2.11743	1.57809e-13	AT1G21830
chr4	7544400	7545399	78	35	1.14532e-09	2.11654	2.77311e-08	AT4G12880
chr1	23899200	23900199	80	36	8.2287e-10	2.11051	2.06066e-08	AT1G64385
chr1	28051800	28055199	255	115	1.06566e-26	2.10592	6.30312e-24	AT1G74670
chr2	13253800	13254999	204	92	8.68123e-22	2.10592	2.03452e-19	AT2G31085
chr3	7926800	7927599	113	51	5.75805e-13	2.1043	2.58197e-11	AT3G22400
chr2	18524400	18524999	73	33	4.83115e-09	2.10092	1.0364e-07	AT2G44920
chr4	10082000	10082599	53	24	4.62319e-07	2.09732	6.66954e-06	AT4G18240
chr5	25203400	25203999	53	24	4.62319e-07	2.09732	6.66954e-06	AT5G62750
chr3	1766400	1767199	68	31	2.03639e-08	2.08328	3.84991e-07	AT3G05910
chr2	15065400	15065799	48	22	1.97915e-06	2.07214	2.4583e-05	AT2G35880
chr2	11661600	11662399	61	28	1.2023e-07	2.06905	1.94577e-06	AT2G27240
chr5	25937200	25938199	74	34	7.4323e-09	2.06706	1.52463e-07	AT5G64900
chr2	14115400	14115999	50	23	1.40907e-06	2.06463	1.81557e-05	AT2G33310
chr5	608400	609799	100	46	2.93832e-11	2.06463	9.62977e-10	AT5G02700
chr1	28933000	28933599	52	24	1.00271e-06	2.05775	1.33778e-05	AT1G76990
chr2	1173200	1173799	65	30	6.11335e-08	2.05775	1.04448e-06	AT2G03840
chr4	16204600	16206599	104	48	1.50296e-11	2.05775	5.20006e-10	AT4G33790
chr2	10386200	10386599	41	19	1.19548e-05	2.04941	0.000121714	AT2G24430
chr4	2218000	2218799	82	38	1.92927e-09	2.04941	4.43767e-08	AT4G04450
chr5	2531000	2533199	151	70	1.03601e-15	2.0487	8.14447e-14	AT5G07930
chr4	10005800	10007599	125	58	2.50479e-13	2.04683	1.2596e-11	AT4G18020
chr4	17473200	17473799	56	26	5.07192e-07	2.04557	7.20804e-06	AT4G37080
chr5	8394400	8395799	99	46	6.18036e-11	2.04398	1.87235e-09	AT5G24550
chr5	7369200	7370399	114	53	2.80226e-12	2.04281	1.09801e-10	AT5G22260
chr3	22895200	22895799	101	47	4.41173e-11	2.04091	1.38729e-09	AT3G61850
chr1	18700000	18701199	73	34	1.57482e-08	2.03912	3.04686e-07	AT1G50470
chr1	17437800	17438199	45	21	6.00675e-06	2.03513	6.57356e-05	AT1G47510
chr4	12870200	12871199	105	49	2.24697e-11	2.03513	7.5026e-10	AT4G25050
chr1	9459800	9462599	182	85	3.29673e-18	2.03354	3.89988e-16	AT1G27213
chr5	5513800	5516199	167	78	7.10351e-17	2.03339	7.23219e-15	AT5G16770
chr5	6122800	6124799	152	71	1.53631e-15	2.03322	1.16357e-13	AT5G18460
chr2	8021000	8022399	92	43	3.55681e-10	2.03198	9.38982e-09	AT2G18490
chr5	15746200	15747199	92	43	3.55681e-10	2.03198	9.38982e-09	AT5G39330
chr1	5115000	5116399	77	36	7.98293e-09	2.03136	1.62551e-07	AT1G14840
chr3	9412600	9414999	235	110	8.79725e-23	2.02897	2.73177e-20	AT3G25790
chr3	6897600	6898999	126	59	3.71571e-13	2.02823	1.76831e-11	AT3G19850
chr1	21233800	21236399	192	90	6.16632e-19	2.02609	8.60582e-17	AT1G56650
chr1	22714000	22714999	64	30	1.29383e-07	2.02609	2.06431e-06	AT1G61563
chr1	27706800	27707399	98	46	1.2874e-10	2.02334	3.65086e-09	AT1G73680
chr4	6735600	6736399	102	48	6.5353e-11	2.01817	1.9655e-09	AT4G11020
chr5	13959200	13959799	85	40	2.04806e-09	2.01817	4.70222e-08	AT5G35790
chr1	25302000	25303199	104	49	4.65576e-11	2.01575	1.44212e-09	AT1G67520
chr1	26633400	26633999	70	33	4.63752e-08	2.01458	8.15901e-07	AT1G70630
chr1	25279200	25279799	53	25	1.51309e-06	2.01342	1.92661e-05	AT1G67481
chr2	17582600	17583199	53	25	1.51309e-06	2.01342	1.92661e-05	AT2G42190
chr4	6305400	6305999	53	25	1.51309e-06	2.01342	1.92661e-05	AT4G10090
chr3	19539000	19542599	233	110	3.66623e-22	2.0117	9.29352e-20	AT3G52720
chr5	4814000	4814799	91	43	7.3764e-10	2.00989	1.86224e-08	AT5G14880
chr3	7941000	7941599	55	26	1.07176e-06	2.00904	1.4162e-05	AT3G22415
chr5	21779000	21779999	74	35	2.33928e-08	2.008	4.36935e-07	AT5G53610
chr1	24342400	24344799	152	72	4.61551e-15	2.00498	3.11572e-13	AT1G65483
chr3	1139400	1140399	76	36	1.66134e-08	2.00498	3.18449e-07	AT3G04300
chr3	3043200	3046599	249	118	2.49323e-23	2.00409	8.36985e-21	AT3G09920
chr2	873600	874399	78	37	1.17985e-08	2.00213	2.34104e-07	AT2G02990
Identification of DMRs in Ler, ein6-1, een-1 and ein6-1 een-1 seedlings using methylpy
5mC
chromosome	start	end	differentially methylated cytosines	methylation Ler	methylation ein6-1	methylation een-1	methylationein6-1een-1	gene name
chr1	27684831	27685245	51	0.00819672	0.0288248	0.742758	0.06914	AT1G73630
chr1	16912241	16912631	13	0.15873	0.0534759	0.132653	0.732719	AT1G44780
chr1	16912241	16912631	13	0.15873	0.0534759	0.132653	0.732719	AT1G44790
chr1	16184057	16184718	12	0.0116279	0.34456	0.742806	0.880829	AT1G43040
chr1	13043475	13044057	11	0.045614	0.90553	0.592798	0.731544	AT1G35461
chr1	29299612	29300010	11	0.216667	0.132258	0.509756	0.175084	AT1G77920
chr1	25468773	25468959	11	0.505051	0.604895	0.117438	0.130952	AT1G67900
chr1	29955308	29955674	11	0.234568	0.296296	0.726688	0.149123	AT1G79610
chr1	242975	243015	10	0.801527	0.119658	0.876543	0.227642	AT1G01670
chr1	7772628	7772826	10	0	0.503704	0.0035461	0.00754717	AT1G22050
chr1	9568783	9568876	10	0.383984	0.61035	0.138258	0.182232	AT1G27550
chr1	11661766	11662213	10	0.805031	0.123377	0.171598	0.031746	AT1G32337
chr1	10962455	10962850	10	0.373464	0.558559	0.291262	0.268585	AT1G30825
chr1	10118868	10118960	10	0	0.416667	0	0	AT1G29010
chr1	29506135	29506493	10	0.550898	0.413934	0.766323	0.43083	AT1G78420
chr2	2330666	2331112	16	0.957516	0.952186	0.94186	0.519305	AT2G06002
chr2	3780498	3780707	14	0.933602	0.957169	0.485714	0.965015	AT2G09970
chr2	11599851	11600659	13	0.139489	0.167558	0.396382	0.580275	AT2G27145
chr2	1119362	1119814	13	0.577778	0.622905	0.230583	0.594262	AT2G03670
chr2	1959141	1959523	12	0.236994	0.238636	0.683544	0.0948905	AT2G05360
chr2	2910643	2910917	11	0.429319	0.94501	0.8125	0.92029	AT2G07020
chr2	17664310	17664404	10	0.00621118	0.660622	0.566667	0.639269	AT2G42430
chr2	11326639	11326768	10	0.00892857	0.888601	0.625899	0.874046	AT2G26620
chr2	15836101	15836437	10	0.508	0.00346021	0.138996	0.0416667	AT2G37770
chr2	6301764	6302071	10	0.658273	0.519637	0.892031	0.467742	AT2G14720
chr3	16900271	16900832	24	0.0480226	0.805085	0.105134	0.725543	AT3G45990
chr3	18554211	18554433	16	0.156098	0.642965	0.157692	0.534632	AT3G50050
chr3	8977626	8978359	16	0.884058	0.828457	0.871409	0.300493	AT3G24610
chr3	11785035	11785272	14	0.0569307	0.727273	0.487245	0.53753	AT3G30160
chr3	6261340	6261539	14	0.0025641	0.163022	0.24053	0.796163	AT3G18260
chr3	1366859	1367308	13	0.0121951	0.00573066	0.0292553	0.484472	AT3G04940
chr3	16440909	16441135	13	0.918605	0.889286	0.360996	0.0577778	AT3G44980
chr3	911570	911804	12	0.240506	0.247458	0.253041	0.765306	AT3G03690
chr3	214357	214642	12	0.866242	0.779468	0.829787	0.209302	AT3G01540
chr3	18730094	18730349	11	0.0215054	0.53125	0.0364372	0.613861	AT3G50470
chr3	7872205	7872631	11	0.330544	0.266423	0.680124	0.749117	AT3G22260
chr3	1189875	1190099	11	0.0915493	0.151515	0.0952381	0.850932	AT3G04470
chr3	10316829	10317542	10	0.449541	0.736227	0.684211	0.764211	AT3G27820
chr3	21688419	21688580	10	0.953586	0.349727	0.932692	0.700389	AT3G58640
chr3	4599395	4599837	10	0.214815	0.26699	0.349345	0.814346	AT3G13930
chr3	10334582	10335067	10	0.577586	0.195122	0.271768	0.14375	AT3G27870
chr3	1531035	1531550	10	0.320675	0.320755	0.294595	0.644128	AT3G05350
chr3	1531035	1531550	10	0.320675	0.320755	0.294595	0.644128	AT3G05360
chr3	5185268	5185551	10	0.917241	0.857868	0.716667	0.218447	AT3G15355
chr3	10988802	10989165	10	0.217949	0.707792	0.705882	0.66426	AT3G28970
chr4	13616310	13617238	21	0.655602	0.662609	0.190865	0.0107759	AT4G27180
chr4	9173291	9173579	20	0.381605	0.792958	0.326625	0.174098	AT4G16195
chr4	11261792	11262378	19	0.0160858	0.00650759	0.463687	0.641791	AT4G21100
chr4	11256862	11257316	18	0.0176211	0.0177305	0.682171	0.808383	AT4G21090
chr4	12750486	12750755	18	0.152542	0.0835655	0.776722	0.809689	AT4G24730
chr4	10789285	10789803	12	0.242991	0.011976	0.370277	0.306818	AT4G19900
chr4	14268928	14269155	11	0.0430108	0.0272109	0.704433	0.746377	AT4G28920
chr4	11263104	11263550	11	0.0762712	0.0316456	0.804469	0.923529	AT4G21100
chr4	16185164	16185583	11	0.351852	0.718266	0.248352	0.0861538	AT4G33730
chr4	16636961	16637183	11	0.598854	0.751269	0.263333	0.0480349	AT4G34920
chr4	15246187	15246488	10	0.453659	0.409396	0.76873	0.818548	AT4G31420
chr4	11196108	11196410	10	0.469274	0.526316	0.144444	0.00884956	AT4G20920
chr4	13402647	13403260	10	0.743719	0.768116	0.515755	0.414085	AT4G26550
chr5	789482	790672	40	0.831563	0.387097	0.802301	0.0736994	AT5G03280
chr5	10001220	10001820	26	0.386667	0.758904	0.133556	0.82662	AT5G27967
chr5	5611964	5612633	22	0.246154	0.764583	0.196796	0.814727	AT5G17060
chr5	791018	791663	22	0.803279	0.317647	0.719178	0.0124224	AT5G03280
chr5	2034711	2035532	17	0.261566	0.773263	0.416789	0.73906	AT5G06620
chr5	10015934	10016180	16	0.08	0.614173	0.0304348	0.801948	AT5G27980
chr5	9822353	9822876	15	0.618619	0.907372	0.552632	0.905579	AT5G27730
chr5	25946206	25946524	15	0.631579	0.695291	0.292627	0.204334	AT5G64930
chr5	26855791	26856013	15	0.918699	0.915751	0.262136	0.172775	AT5G67300
chr5	26855791	26856013	15	0.918699	0.915751	0.262136	0.172775	AT5G67310
chr5	7641380	7641585	14	0.32021	0.884342	0.302839	0.876133	AT5G22860
chr5	6824245	6824495	13	0.645161	0.0343137	0.789256	0.00947867	AT5G20220
chr5	5865231	5865331	12	0.721805	0.0821918	0.764505	0.00507614	AT5G17770
chr5	1485128	1485498	12	0.00404858	0.630607	0.0352564	0.663677	AT5G05030
chr5	25914243	25914458	11	0.337278	0.106838	0.7251	0.801932	AT5G64820
chr5	26153137	26153571	11	0.854651	0.390698	0.633188	0.419048	AT5G65440
chr5	4837497	4837902	11	0.0901639	0.472119	0.0574324	0.525	AT5G14950
chr5	3607750	3608300	11	0.245223	0.548052	0.286232	0.59673	AT5G11310
chr5	3142196	3142287	11	0	0.565836	0.00438597	0.690355	AT5G10030
chr5	4644891	4644988	10	0.0194175	0.527273	0	0.0588235	AT5G14400
chr5	1287879	1288577	10	0.5	0.607143	0.414062	0.688053	AT5G04510
chr5	5499907	5500403	10	0.721865	0.353293	0.692308	0.333333	AT5G16730
chr5	5015278	5015895	10	0.481848	0.605405	0.325893	0.631728	AT5G15450
chr5	9286826	9287217	10	0.319277	0.76834	0.352941	0.726829	AT5G26742
chr5	4058126	4058225	10	0.942857	0.101695	0.903226	0.0120482	AT5G12850
chr5	2165188	2165607	10	0.669291	0.276527	0.683274	0.317797	AT5G06970
chr5	26317672	26317829	10	0.77707	0.565445	0.216495	0.02	AT5G65780
chr5	23011344	23011769	10	0.781182	0.782209	0.724138	0.480769	AT5G56890
