# Supplementary material for: Epigenetic silencing of a multifunctional plant stress regulator
Source: eLife. 2019 Aug 16;8:e47835. doi: 10.7554/eLife.47835 (PMC6739875; doi:10.7554/eLife.47835)
Supplement: Supplementary file 5. — Tables display the binding sites of EIN6, EIN6-ZNF and EEN that were determined with SICER and GEM. [file elife-47835-supp5.xlsx]

## Sheet: 1000 top-ranked EIN6 targets
Supplementary File 5: Binding sites of EIN6, EIN6-ZNF and EEN
GEM narrowPeak events (EIN6 ChIP vs IgG merge)
1000 top-ranked peaks of EIN6 ChIP-seq
chromsome	peak start	peak end
chr3	13590501	13590702
chr3	13591885	13592086
chr5	11185660	11185861
chr3	13591481	13591682
chr3	13591176	13591377
chr5	11184962	11185163
chr3	13592178	13592379
chr3	14195931	14196132
chr5	11186352	11186553
chr3	14195565	14195766
chr2	3626151	3626352
chr4	3951289	3951490
chr4	3951775	3951976
chr2	3622540	3622741
chr3	13589272	13589473
chr5	11733658	11733859
chr3	14204348	14204549
chr3	14193933	14194134
chr3	14192274	14192475
chr2	19698060	19698261
chr4	3954383	3954584
chr2	9949	10150
chr3	14194906	14195107
chr3	14194658	14194859
chr5	11735971	11736172
chr4	3054604	3054805
chr2	3616730	3616931
chr3	14204879	14205080
chr3	14193073	14193274
chr2	3614930	3615131
chr1	15083637	15083838
chr1	15082054	15082255
chr2	3618937	3619138
chr5	11731404	11731605
chr1	15084840	15085041
chr3	13589095	13589296
chr2	3623597	3623798
chr5	11732181	11732382
chr5	11702962	11703163
chr2	3619890	3620091
chr3	13589913	13590114
chr1	15084320	15084521
chr5	11735117	11735318
chr5	11708211	11708412
chr4	3061002	3061203
chr5	11734766	11734967
chr2	9230764	9230965
chr5	11708901	11709102
chr4	2545645	2545846
chr2	3619454	3619655
chr3	13590665	13590866
chr4	18252311	18252512
chr3	14191829	14192030
chr2	7191065	7191266
chr2	3616878	3617079
chr2	3607141	3607342
chr1	14824493	14824694
chr1	10337199	10337400
chr4	3055144	3055345
chr5	11730381	11730582
chr4	2545795	2545996
chr3	13632993	13633194
chr1	6623065	6623266
chr4	16825244	16825445
chr5	11727715	11727916
chr4	3986033	3986234
chr2	11566618	11566819
chr4	3972590	3972791
chr4	4000630	4000831
chr1	15083104	15083305
chr4	12686699	12686900
chr5	18370152	18370353
chr2	3625202	3625403
chr4	4007229	4007430
chr4	3984369	3984570
chr1	15085531	15085732
chr2	3605736	3605937
chr4	3966460	3966661
chr5	3253110	3253311
chr2	3606586	3606787
chr5	11705254	11705455
chr3	14193205	14193406
chr5	11704039	11704240
chr5	23300054	23300255
chr3	248879	249080
chr4	3987405	3987606
chr3	22211923	22212124
chr5	25704506	25704707
chr2	3623341	3623542
chr5	23842455	23842656
chr5	11702283	11702484
chr5	11728228	11728429
chr4	3970944	3971145
chr5	25551886	25552087
chr2	16840753	16840954
chr2	3621496	3621697
chr2	18300544	18300745
chr1	5598675	5598876
chr4	3977710	3977911
chr3	1437636	1437837
chr4	12687013	12687214
chr1	10334832	10335033
chr2	3495794	3495995
chr1	29867323	29867524
chr4	3965652	3965853
chr4	5740603	5740804
chr2	3615948	3616149
chr4	4009682	4009883
chr5	11727036	11727237
chr2	3616524	3616725
chr2	3624516	3624717
chr5	11724376	11724577
chr4	4006155	4006356
chr2	9443574	9443775
chr1	28248332	28248533
chr3	7104230	7104431
chr1	29867375	29867576
chr1	6833100	6833301
chr3	10506703	10506904
chr4	5740907	5741108
chr5	25704174	25704375
chr5	21805139	21805340
chr5	11733056	11733257
chr3	13588780	13588981
chr5	3550785	3550986
chr5	11704521	11704722
chr3	9302479	9302680
chr4	3998072	3998273
chr2	242852	243053
chr3	19265501	19265702
chr4	4003955	4004156
chr2	14013456	14013657
chr5	2867259	2867460
chr1	3086719	3086920
chr4	3971108	3971309
chr5	22440736	22440937
chr5	11187308	11187509
chr1	14658516	14658717
chr1	10335028	10335229
chr1	26597934	26598135
chr5	23280987	23281188
chr1	1280250	1280451
chr4	3974691	3974892
chr4	4002172	4002373
chr3	20785242	20785443
chr5	3525025	3525226
chr1	15085222	15085423
chr5	25722242	25722443
chr4	16825407	16825608
chr5	23233788	23233989
chr5	1990243	1990444
chr5	15939376	15939577
chr1	1710427	1710628
chr4	16356709	16356910
chr1	19775875	19776076
chr1	21888107	21888308
chr5	11701910	11702111
chr1	3352622	3352823
chr4	4001109	4001310
chr2	10754393	10754594
chr4	2719530	2719731
chr2	15083851	15084052
chr1	27864335	27864536
chr1	3352460	3352661
chr4	3978780	3978981
chr4	3984539	3984740
chr2	10754084	10754285
chr5	11706887	11707088
chr1	5337408	5337609
chr4	1416161	1416362
chr4	17517823	17518024
chr4	7758816	7759017
chr1	6062504	6062705
chr1	28248603	28248804
chr5	23307537	23307738
chr5	26017924	26018125
chr5	7840240	7840441
chr5	20886463	20886664
chr4	3976549	3976750
chr1	26142561	26142762
chr2	3607652	3607853
chr5	11186803	11187004
chr2	16840814	16841015
chr5	11723349	11723550
chr4	3979330	3979531
chr1	9648277	9648478
chr1	26142499	26142700
chr1	25042998	25043199
chr3	19570023	19570224
chr3	22211852	22212053
chr3	21060465	21060666
chr5	11726210	11726411
chr3	5620038	5620239
chr5	8774074	8774275
chr3	5121877	5122078
chr1	18626076	18626277
chr1	21521513	21521714
chr5	14130	14331
chr1	7105320	7105521
chr1	29365147	29365348
chr1	29392574	29392775
chr4	4010149	4010350
chr3	7507331	7507532
chr5	11765761	11765962
chr2	5296386	5296587
chr2	17946156	17946357
chr5	25271895	25272096
chr5	24386494	24386695
chr1	10344254	10344455
chr5	3267689	3267890
chr1	216217	216418
chr1	709390	709591
chr5	20993970	20994171
chr2	17675159	17675360
chr1	5727295	5727496
chr2	12814703	12814904
chr5	4818898	4819099
chr5	18746143	18746344
chr5	18032080	18032281
chr3	7795417	7795618
chr1	12091067	12091268
chr2	12814586	12814787
chr5	15597711	15597912
chr1	1675233	1675434
chr4	18458326	18458527
chr1	10332834	10333035
chr5	18036781	18036982
chr5	11707387	11707588
chr4	12006043	12006244
chr1	29365500	29365701
chr4	2588600	2588801
chr3	17179642	17179843
chr1	29238933	29239134
chr3	13589952	13590153
chr5	16816062	16816263
chr5	18746245	18746446
chr3	18528692	18528893
chr5	927614	927815
chr1	11712080	11712281
chr4	18571693	18571894
chr5	2959161	2959362
chr1	7850704	7850905
chr2	15192787	15192988
chr5	21882691	21882892
chr1	9575528	9575729
chr5	19180362	19180563
chr4	186970	187171
chr5	8774377	8774578
chr4	17518013	17518214
chr3	9302843	9303044
chr5	26147350	26147551
chr4	3976027	3976228
chr2	17809355	17809556
chr4	12138913	12139114
chr4	10440714	10440915
chr2	8493199	8493400
chr5	5422536	5422737
chr2	14282794	14282995
chr5	14935184	14935385
chr3	3186831	3187032
chr2	14081125	14081326
chr1	5528463	5528664
chr3	6803646	6803847
chr2	17808107	17808308
chr3	4915204	4915405
chr2	7190932	7191133
chr5	23735640	23735841
chr4	12148480	12148681
chr3	6420220	6420421
chr5	17586124	17586325
chr3	6697005	6697206
chr1	11800429	11800630
chr4	13810059	13810260
chr5	1931078	1931279
chr4	18123206	18123407
chr1	14659553	14659754
chr3	19441705	19441906
chr1	7696751	7696952
chr3	5693118	5693319
chr4	10522024	10522225
chr4	10522107	10522308
chr2	3607672	3607873
chr3	1796132	1796333
chr1	9473355	9473556
chr5	2436616	2436817
chr2	16689395	16689596
chr1	29458869	29459070
chr4	11155817	11156018
chr4	6443072	6443273
chr2	16840559	16840760
chr5	3550454	3550655
chr5	21242602	21242803
chr2	15083438	15083639
chr5	19255019	19255220
chr5	18529403	18529604
chr1	20878672	20878873
chr4	13155005	13155206
chr5	22443130	22443331
chr3	21060190	21060391
chr2	17114180	17114381
chr1	5598739	5598940
chr4	17147826	17148027
chr5	11727427	11727628
chr1	3472347	3472548
chr3	1105092	1105293
chr2	18158288	18158489
chr5	15929472	15929673
chr2	7757115	7757316
chr5	23148673	23148874
chr1	9648580	9648781
chr3	2603652	2603853
chr5	16432883	16433084
chr1	6521450	6521651
chr3	20551646	20551847
chr5	22520680	22520881
chr1	7512699	7512900
chr3	7507855	7508056
chr5	24954812	24955013
chr4	3999652	3999853
chr1	261257	261458
chr3	19266225	19266426
chr2	17991436	17991637
chr5	21817696	21817897
chr2	16367495	16367696
chr5	919538	919739
chr2	16439955	16440156
chr3	10506514	10506715
chr3	885832	886033
chr1	15094164	15094365
chr5	514195	514396
chr3	5110476	5110677
chr1	29458992	29459193
chr2	16743334	16743535
chr3	18930478	18930679
chr1	5337684	5337885
chr5	21743559	21743760
chr3	5326999	5327200
chr1	4461758	4461959
chr2	14959899	14960100
chr3	566964	567165
chr5	3525372	3525573
chr4	3982433	3982634
chr1	268653	268854
chr2	11283282	11283483
chr5	2138287	2138488
chr4	3999297	3999498
chr3	8972455	8972656
chr4	17049834	17050035
chr4	18244139	18244340
chr4	5268143	5268344
chr5	6903493	6903694
chr2	7513450	7513651
chr4	3983341	3983542
chr1	28587291	28587492
chr4	17147891	17148092
chr3	4037204	4037405
chr2	7757499	7757700
chr4	12044480	12044681
chr5	12619822	12620023
chr2	2271778	2271979
chr4	18252823	18253024
chr5	25813132	25813333
chr1	2328999	2329200
chr1	19059889	19060090
chr4	10389822	10390023
chr4	12138336	12138537
chr5	23302618	23302819
chr4	16452217	16452418
chr1	21521851	21522052
chr4	856863	857064
chr3	3730359	3730560
chr2	6399944	6400145
chr1	30385238	30385439
chr1	10344054	10344255
chr5	4174525	4174726
chr3	22228673	22228874
chr2	17262474	17262675
chr2	3606102	3606303
chr2	12835084	12835285
chr2	3718190	3718391
chr4	2588160	2588361
chr4	13937137	13937338
chr4	5792475	5792676
chr5	1931241	1931442
chr2	19043937	19044138
chr4	14882763	14882964
chr5	8128284	8128485
chr1	1685963	1686164
chr3	20550143	20550344
chr1	6135980	6136181
chr1	23891609	23891810
chr2	8328107	8328308
chr5	24213042	24213243
chr3	9312206	9312407
chr1	7697084	7697285
chr5	24215225	24215426
chr1	9260243	9260444
chr3	8960703	8960904
chr5	21080428	21080629
chr2	7495349	7495550
chr3	19441347	19441548
chr4	3985276	3985477
chr1	1995681	1995882
chr3	15952656	15952857
chr1	18179359	18179560
chr3	6816733	6816934
chr1	23410628	23410829
chr2	11566948	11567149
chr1	26705080	26705281
chr2	2317173	2317374
chr5	22547761	22547962
chr1	6557952	6558153
chr1	27646256	27646457
chr1	11799299	11799500
chr4	10440375	10440576
chr1	26597840	26598041
chr5	23738351	23738552
chr1	3803585	3803786
chr2	17229390	17229591
chr5	361591	361792
chr3	21868491	21868692
chr2	17991899	17992100
chr5	6298538	6298739
chr4	11941151	11941352
chr2	2271458	2271659
chr3	3402191	3402392
chr1	1168149	1168350
chr5	5578342	5578543
chr3	21628877	21629078
chr1	8147816	8148017
chr3	11166193	11166394
chr5	23730479	23730680
chr3	10848389	10848590
chr3	17504428	17504629
chr4	13733187	13733388
chr1	29834284	29834485
chr3	4915977	4916178
chr3	6900848	6901049
chr5	24758933	24759134
chr1	12091378	12091579
chr5	7559415	7559616
chr3	7628708	7628909
chr3	9260773	9260974
chr1	29238651	29238852
chr1	25815645	25815846
chr1	9473638	9473839
chr5	22358106	22358307
chr5	1913510	1913711
chr1	6945596	6945797
chr5	1529671	1529872
chr3	2870451	2870652
chr2	16444496	16444697
chr1	5613206	5613407
chr1	14660098	14660299
chr4	8828001	8828202
chr4	1279176	1279377
chr5	591853	592054
chr5	21120804	21121005
chr1	27430777	27430978
chr2	13003759	13003960
chr2	19058263	19058464
chr4	16918154	16918355
chr4	17454862	17455063
chr1	1710475	1710676
chr1	15421073	15421274
chr3	4310748	4310949
chr2	19608626	19608827
chr3	10435626	10435827
chr2	18300693	18300894
chr4	4011538	4011739
chr5	362698	362899
chr4	18458426	18458627
chr4	15558892	15559093
chr2	9231060	9231261
chr1	29459214	29459415
chr4	18153723	18153924
chr5	11726390	11726591
chr3	3186512	3186713
chr5	12619914	12620115
chr3	5029127	5029328
chr1	1304492	1304693
chr5	919836	920037
chr1	11115417	11115618
chr5	24047462	24047663
chr2	14423163	14423364
chr5	3267992	3268193
chr5	592262	592463
chr3	21863808	21864009
chr1	21888280	21888481
chr1	28144534	28144735
chr3	8588711	8588912
chr1	29009434	29009635
chr1	520773	520974
chr1	26696057	26696258
chr5	15939584	15939785
chr3	6792593	6792794
chr5	25397774	25397975
chr4	7266579	7266780
chr4	13015830	13016031
chr1	23090066	23090267
chr2	14372170	14372371
chr1	7836786	7836987
chr4	6893034	6893235
chr3	908052	908253
chr4	1251051	1251252
chr1	11215574	11215775
chr5	428094	428295
chr4	13125032	13125233
chr4	686571	686772
chr3	22556295	22556496
chr3	1087692	1087893
chr1	26240186	26240387
chr1	28747323	28747524
chr1	15138459	15138660
chr1	26122404	26122605
chr4	13663915	13664116
chr4	17530048	17530249
chr5	6578188	6578389
chr1	26414621	26414822
chr4	16918710	16918911
chr5	16433447	16433648
chr5	6285900	6286101
chr1	27993662	27993863
chr1	26142644	26142845
chr1	6268312	6268513
chr5	13902474	13902675
chr1	24848789	24848990
chr2	12889307	12889508
chr5	24103225	24103426
chr5	17586431	17586632
chr2	18442740	18442941
chr4	1157054	1157255
chr3	9723380	9723581
chr1	534042	534243
chr5	22866084	22866285
chr4	15991212	15991413
chr5	14999081	14999282
chr4	4011062	4011263
chr3	20785465	20785666
chr4	9499053	9499254
chr5	21420172	21420373
chr2	7674420	7674621
chr1	23045147	23045348
chr1	25042598	25042799
chr1	982704	982905
chr5	6291169	6291370
chr3	15952361	15952562
chr1	10680882	10681083
chr1	24609968	24610169
chr5	1206851	1207052
chr4	2719152	2719353
chr2	8491462	8491663
chr3	20066040	20066241
chr5	24701821	24702022
chr3	6033349	6033550
chr1	6062806	6063007
chr3	18546840	18547041
chr4	9753307	9753508
chr4	3979649	3979850
chr1	24517785	24517986
chr3	5693431	5693632
chr3	6543275	6543476
chr1	27719212	27719413
chr2	7637494	7637695
chr1	29643012	29643213
chr1	9956423	9956624
chr1	6578800	6579001
chr4	12044659	12044860
chr4	2736238	2736439
chr5	26773627	26773828
chr5	25507485	25507686
chr1	21344815	21345016
chr3	22394522	22394723
chr1	3288137	3288338
chr4	13872847	13873048
chr3	23399197	23399398
chr1	7194107	7194308
chr5	24701451	24701652
chr5	22873396	22873597
chr4	17151080	17151281
chr3	17439440	17439641
chr1	29512475	29512676
chr3	23400418	23400619
chr1	22869982	22870183
chr5	16724246	16724447
chr1	6060937	6061138
chr2	11671548	11671749
chr4	18547808	18548009
chr4	17033292	17033493
chr5	21795113	21795314
chr2	9443891	9444092
chr1	29076619	29076820
chr4	15291087	15291288
chr1	19776104	19776305
chr5	26879340	26879541
chr4	845005	845206
chr1	4739975	4740176
chr3	5576603	5576804
chr3	5458580	5458781
chr3	19768420	19768621
chr1	22486770	22486971
chr5	24047240	24047441
chr3	5121448	5121649
chr2	15193129	15193330
chr5	3385608	3385809
chr5	24939689	24939890
chr1	7088679	7088880
chr5	21470653	21470854
chr1	9286018	9286219
chr5	26425177	26425378
chr5	6470729	6470930
chr3	18897849	18898050
chr5	18600806	18601007
chr2	17262217	17262418
chr2	11684481	11684682
chr1	24528978	24529179
chr5	12877482	12877683
chr3	6845435	6845636
chr5	5797185	5797386
chr3	7387983	7388184
chr4	10974778	10974979
chr2	4311548	4311749
chr1	20783141	20783342
chr5	21883052	21883253
chr2	2317556	2317757
chr3	9711894	9712095
chr5	11724006	11724207
chr3	837683	837884
chr1	515020	515221
chr1	29064197	29064398
chr5	22975812	22976013
chr1	23798458	23798659
chr5	24671362	24671563
chr4	5993225	5993426
chr1	28741398	28741599
chr4	995002	995203
chr5	20931939	20932140
chr1	4467184	4467385
chr3	1796491	1796692
chr1	2255374	2255575
chr5	21795290	21795491
chr5	24744828	24745029
chr4	6245743	6245944
chr1	29391993	29392194
chr3	4973478	4973679
chr3	7105598	7105799
chr2	19617488	19617689
chr1	7169196	7169397
chr1	22870125	22870326
chr2	17226975	17227176
chr5	448092	448293
chr3	21863717	21863918
chr3	18891410	18891611
chr4	1046574	1046775
chr3	22907201	22907402
chr5	16569726	16569927
chr2	17946229	17946430
chr1	9425841	9426042
chr2	14546350	14546551
chr1	21344759	21344960
chr3	3442778	3442979
chr5	1354821	1355022
chr2	15669085	15669286
chr4	12176015	12176216
chr1	618833	619034
chr5	990177	990378
chr2	13519611	13519812
chr3	23381067	23381268
chr5	23374490	23374691
chr5	23313641	23313842
chr4	7492213	7492414
chr3	20681440	20681641
chr2	18873023	18873224
chr3	499106	499307
chr5	1529301	1529502
chr1	7200582	7200783
chr4	12883464	12883665
chr4	9499495	9499696
chr4	17375140	17375341
chr5	23342514	23342715
chr1	1926947	1927148
chr1	8281954	8282155
chr1	9241586	9241787
chr1	528461	528662
chr5	3784429	3784630
chr1	29715584	29715785
chr2	3615716	3615917
chr2	18158418	18158619
chr1	9408169	9408370
chr2	4311211	4311412
chr2	9173088	9173289
chr3	20198128	20198329
chr5	26530400	26530601
chr1	7374623	7374824
chr1	3102298	3102499
chr1	3814179	3814380
chr1	222477	222678
chr3	8588877	8589078
chr1	29599692	29599893
chr2	10490472	10490673
chr2	15104794	15104995
chr2	14017198	14017399
chr5	2357952	2358153
chr1	23891477	23891678
chr2	18253838	18254039
chr5	23476994	23477195
chr1	3187570	3187771
chr4	3978576	3978777
chr2	15944840	15945041
chr2	19251197	19251398
chr1	5727007	5727208
chr3	22496980	22497181
chr3	22196834	22197035
chr4	13929597	13929798
chr1	3485075	3485276
chr1	14822659	14822860
chr5	6218225	6218426
chr1	3814295	3814496
chr4	17570980	17571181
chr3	6900634	6900835
chr2	18883929	18884130
chr3	22738599	22738800
chr3	3196807	3197008
chr1	19668515	19668716
chr1	18500216	18500417
chr4	13929922	13930123
chr5	4008305	4008506
chr2	6823513	6823714
chr4	8711305	8711506
chr1	10663601	10663802
chr2	19317858	19318059
chr1	11260535	11260736
chr5	16026972	16027173
chr1	19524563	19524764
chr4	14797055	14797256
chr2	9925338	9925539
chr3	22435105	22435306
chr4	12909795	12909996
chr1	4624355	4624556
chr4	8055091	8055292
chr1	28183360	28183561
chr5	1624720	1624921
chr2	14929336	14929537
chr2	7256172	7256373
chr1	14509500	14509701
chr3	2867140	2867341
chr1	28814009	28814210
chr1	1646213	1646414
chr3	16984654	16984855
chr5	5719003	5719204
chr1	541549	541750
chr4	17786984	17787185
chr5	22158226	22158427
chr3	11116086	11116287
chr4	12073126	12073327
chr2	16050436	16050637
chr3	8622911	8623112
chr3	5953267	5953468
chr1	25880800	25881001
chr5	19976754	19976955
chr5	24215403	24215604
chr5	2859165	2859366
chr1	27303644	27303845
chr1	28180421	28180622
chr3	22847969	22848170
chr4	1004863	1005064
chr2	15973009	15973210
chr5	21981938	21982139
chr4	11032037	11032238
chr4	10389641	10389842
chr3	9302146	9302347
chr2	13799263	13799464
chr1	29209514	29209715
chr5	21428639	21428840
chr2	19058717	19058918
chr5	3171492	3171693
chr2	15973358	15973559
chr1	15136864	15137065
chr5	17731451	17731652
chr5	6975439	6975640
chr3	22161555	22161756
chr4	16661905	16662106
chr3	23045572	23045773
chr3	4201184	4201385
chr1	4782360	4782561
chr5	1564430	1564631
chr1	1661573	1661774
chr4	7268818	7269019
chr2	11833290	11833491
chr4	1229448	1229649
chr5	11710194	11710395
chr2	7942046	7942247
chr2	16766860	16767061
chr4	9519048	9519249
chr5	18036988	18037189
chr1	8148022	8148223
chr5	23730602	23730803
chr5	3277898	3278099
chr3	6020767	6020968
chr3	10228935	10229136
chr5	16562883	16563084
chr5	24656081	24656282
chr5	17865122	17865323
chr5	22695106	22695307
chr1	28174404	28174605
chr3	6697327	6697528
chr4	16452622	16452823
chr4	15875483	15875684
chr1	10886246	10886447
chr5	18135935	18136136
chr2	100942	101143
chr2	10631321	10631522
chr5	3890431	3890632
chr2	3627740	3627941
chr1	27279604	27279805
chr2	17522271	17522472
chr2	18498794	18498995
chr2	9538361	9538562
chr5	18979656	18979857
chr5	16156850	16157051
chr1	19667988	19668189
chr5	20801054	20801255
chr5	24662506	24662707
chr4	16574334	16574535
chr4	8710895	8711096
chr4	11708330	11708531
chr4	18428124	18428325
chr1	20912798	20912999
chr3	16932321	16932522
chr4	13001070	13001271
chr5	6774870	6775071
chr4	3040631	3040832
chr2	8471035	8471236
chr4	6307268	6307469
chr2	17809066	17809267
chr1	6860091	6860292
chr4	523626	523827
chr5	2859787	2859988
chr3	2983310	2983511
chr5	20264428	20264629
chr1	15207074	15207275
chr5	21472598	21472799
chr4	846192	846393
chr4	152346	152547
chr4	349600	349801
chr1	28823293	28823494
chr1	20783439	20783640
chr5	24767029	24767230
chr4	152022	152223
chr5	15929571	15929772
chr4	15896043	15896244
chr2	8985902	8986103
chr1	28684705	28684906
chr2	18443086	18443287
chr3	4012894	4013095
chr3	5032290	5032491
chr5	3018079	3018280
chr5	772288	772489
chr1	615692	615893
chr1	28838019	28838220
chr1	4462021	4462222
chr2	16068050	16068251
chr4	10522409	10522610
chr2	7899022	7899223
chr3	18037735	18037936
chr1	7084714	7084915
chr5	3890241	3890442
chr5	22419402	22419603
chr4	16910476	16910677
chr4	6443196	6443397
chr1	15149298	15149499
chr5	26128823	26129024
chr2	15868709	15868910
chr4	12195814	12196015
chr2	18604258	18604459
chr1	19747070	19747271
chr1	28393426	28393627
chr1	15148070	15148271
chr1	2561353	2561554
chr5	25037769	25037970
chr1	2218859	2219060
chr2	1006820	1007021
chr5	7384722	7384923
chr2	9563802	9564003
chr2	13751667	13751868
chr5	19596589	19596790
chr4	12777629	12777830
chr1	27639996	27640197
chr1	28163744	28163945
chr4	14825931	14826132
chr3	20509592	20509793
chr5	23299979	23300180
chr4	446298	446499
chr5	21139315	21139516
chr2	7898435	7898636
chr4	12526608	12526809
chr5	20071012	20071213
chr4	15290747	15290948
chr3	1514711	1514912
chr3	8972771	8972972
chr5	9463818	9464019
chr1	5891039	5891240
chr4	10890787	10890988
chr1	29077168	29077369
chr2	19600407	19600608
chr1	11827530	11827731
chr1	7253390	7253591
chr1	12852467	12852668
chr2	9086949	9087150
chr1	17837080	17837281
chr3	10045293	10045494
chr3	16890744	16890945
chr1	1527242	1527443
chr4	3980466	3980667
chr2	7391736	7391937
chr1	4467492	4467693
chr1	17785737	17785938
chr1	27996468	27996669
chr2	19461242	19461443
chr1	14657872	14658073
chr4	14043041	14043242
chr5	11711452	11711653
chr1	28164045	28164246
chr5	23941591	23941792
chr4	10891155	10891356
chr5	26246032	26246233
chr4	13397884	13398085
chr4	523918	524119
chr5	1346894	1347095
chr2	16557126	16557327
chr3	2866963	2867164
chr1	26294022	26294223
chr5	21804642	21804843
chr1	28741135	28741336
chr5	21596243	21596444
chr3	22161033	22161234
chr5	19802897	19803098
chr5	15489889	15490090
chr2	11860986	11861187
chr3	7412987	7413188
chr1	2190105	2190306
chr1	23399672	23399873
chr3	2315809	2316010
chr2	9842248	9842449
chr4	10611389	10611590
chr1	27430146	27430347
chr1	3740920	3741121
chr3	5025373	5025574
chr2	12665183	12665384
chr2	6866107	6866308
chr5	25976112	25976313
chr3	19714350	19714551
chr3	7195141	7195342
chr2	7676356	7676557
chr1	15208389	15208590
chr1	23452657	23452858
chr4	7785662	7785863
chr2	14469864	14470065
chr4	16694360	16694561
chr1	26051675	26051876
chr3	957249	957450
chr4	17791808	17792009
chr5	19011797	19011998
chr4	16694914	16695115
chr2	9914636	9914837
chr3	10912514	10912715
chr1	10538194	10538395
chr5	24076151	24076352
chr5	23366224	23366425
chr1	1482744	1482945
chr4	349434	349635
chr3	2343028	2343229
chr5	2889794	2889995
chr4	6967656	6967857
chr1	1973913	1974114
chr3	19473831	19474032
chr5	20885921	20886122
chr2	14469494	14469695
chr5	18547218	18547419
chr1	15207774	15207975
chr5	25858706	25858907
chr1	9806555	9806756
chr5	24775190	24775391
chr5	6905760	6905961
chr1	27034891	27035092
chr2	4130284	4130485
chr4	8084430	8084631
chr1	3577972	3578173
chr1	7194462	7194663
chr5	9173792	9173993
chr1	10663844	10664045
chr1	26259262	26259463
chr2	14200253	14200454
chr3	5567591	5567792
chr1	26919767	26919968
chr1	23683846	23684047
chr5	7183100	7183301
chr1	3577628	3577829
chr1	18150834	18151035
chr2	15945392	15945593

## Sheet: EIN6 ChIP-seq
Supplementary File 5: Binding sites of EIN6, EIN6-ZNF and EEN
SICER (EIN6 ChIPmerge vs IgGmerge)
EIN6 binding sites
Chromosome	domain start	domain end	ChIP_island_read_count	CONTROL_island_read_count	p-value	fold change	FDR threshold	gene name
chr3	9302000	9303599	3512	141	0	9.61195	0	AT3G25590
chr3	2866800	2867399	973	44	0	8.53368	0	AT3G09330
chr4	18251800	18253399	3299	158	0	8.05752	0	AT4G39190
chr1	1674400	1676199	3118	164	0	7.33683	0	AT1G05610
chr5	15939000	15940399	2185	115	0	7.33212	0	AT5G39820
chr1	1279400	1281199	2930	157	0	7.20185	0	AT1G04610
chr2	9230000	9231599	3165	170	0	7.18457	0	AT2G21550
chr2	9230000	9231599	3165	170	0	7.18457	0	AT2G21560
chr5	18368600	18371199	4305	244	0	6.80862	0	AT5G45340
chr5	25703800	25705599	2674	156	0	6.61474	0	AT5G64260
chr1	26141600	26143599	3321	195	0	6.57219	0	AT1G69530
chr5	3550200	3551999	2813	166	0	6.5394	0	AT5G11160
chr1	25042200	25044199	3049	182	0	6.4649	0	AT1G67070
chr4	17147200	17148399	2065	124	0	6.4265	0	AT4G36240
chr5	25551000	25553999	4279	262	0	6.30256	0	AT5G63850
chr4	16823600	16826199	3968	243	0	6.30146	0	AT4G35380
chr5	21804400	21806199	2835	174	0	6.28753	0	AT5G53710
chr5	2866800	2868599	2846	175	0	6.27585	0	AT5G09220
chr2	17807800	17809999	3590	223	0	6.21249	0	AT2G42800
chr1	29865800	29869799	6058	379	0	6.16831	0	AT1G79400
chr1	29865800	29869799	6058	379	0	6.16831	0	AT1G79410
chr2	19043400	19044799	2207	139	0	6.12722	0	AT2G46400
chr5	26017400	26018599	1910	121	0	6.0915	0	AT5G65130
chr1	26597000	26598999	3036	193	0	6.07044	0	AT1G70550
chr5	24041800	24042199	393	25	2.81231e-168	6.06637	1.39495e-167	AT5G59670
chr1	10332200	10338999	11255	719	0	6.04077	0	AT1G29550
chr1	10332200	10338999	11255	719	0	6.04077	0	AT1G29560
chr1	10332200	10338999	11255	719	0	6.04077	0	AT1G29570
chr1	10332200	10338999	11255	719	0	6.04077	0	AT1G29580
chr3	5619200	5620999	2669	171	0	6.02322	0	AT3G16520
chr3	885400	886599	1622	104	0	6.01857	0	AT3G03650
chr1	3086000	3088199	3437	221	0	6.00155	0	AT1G09540
chr4	1256000	1256799	948	61	0	5.99728	0	AT4G02810
chr1	5336800	5338599	2794	180	0	5.99004	0	AT1G15520
chr1	18625000	18626599	2619	169	0	5.98033	0	AT1G50280
chr1	10343600	10346199	3664	241	0	5.86698	0	AT1G29600
chr4	7758400	7761799	4823	318	0	5.85283	0	AT4G13340
chr5	2435800	2437399	2492	166	0	5.79317	0	AT5G07680
chr1	24647000	24648999	2890	193	0	5.77852	0	AT1G66180
chr2	16839800	16842199	3544	238	0	5.74636	0	AT2G40320
chr2	17674800	17675999	1769	119	0	5.73663	0	AT2G42450
chr3	1795200	1797199	2742	185	0	5.71968	0	AT3G05980
chr3	1795200	1797199	2742	185	0	5.71968	0	AT3G05990
chr4	5740200	5741799	2379	161	0	5.70223	0	AT4G08950
chr3	20784400	20786399	2637	179	0	5.68503	0	AT3G56000
chr4	18457800	18459399	2410	164	0	5.67086	0	AT4G39780
chr5	15929000	15930399	1834	125	0	5.66194	0	AT5G39785
chr5	24954400	24955999	1854	127	0	5.63355	0	AT5G62140
chr4	16917600	16919199	2304	158	0	5.62732	0	AT4G35680
chr1	27429800	27431399	1908	131	0	5.62061	0	AT1G72890
chr3	7506800	7509399	3752	258	0	5.61202	0	AT3G21330
chr4	12043800	12045799	2991	206	0	5.60306	0	AT4G22980
chr2	11566000	11568199	2626	182	0	5.568	0	AT2G27090
chr2	11566000	11568199	2626	182	0	5.568	0	AT2G27080
chr3	22434800	22435999	1325	92	0	5.55781	0	AT3G60690
chr5	8833400	8834399	1193	83	0	5.54675	0	AT5G25410
chr5	8833400	8834399	1193	83	0	5.54675	0	AT5G25415
chr5	23841400	23842999	2373	166	0	5.51653	0	AT5G59050
chr5	5421600	5423399	2223	156	0	5.49909	0	AT5G16570
chr4	2544200	2546799	3697	262	0	5.44533	0	AT4G04980
chr5	18600000	18601599	2038	145	0	5.42391	0	AT5G45850
chr3	18528200	18529399	1517	108	0	5.42048	0	AT3G49970
chr3	22210400	22213599	3328	237	0	5.4189	0	AT3G60130
chr4	18547400	18548399	1448	104	0	5.37293	0	AT4G40000
chr2	16699800	16702199	3284	236	0	5.36991	0	AT2G39990
chr2	16699800	16702199	3284	236	0	5.36991	0	AT2G40000
chr2	10753400	10755599	2518	181	0	5.3685	0	AT2G25250
chr2	10753400	10755599	2518	181	0	5.3685	0	AT2G25260
chr3	3401800	3402799	1279	92	0	5.36486	0	AT3G10870
chr2	7927600	7928199	555	40	1.48725e-211	5.35438	9.23178e-211	AT2G18220
chr3	19569200	19570999	2081	152	0	5.28329	0	AT3G52800
chr3	19569200	19570999	2081	152	0	5.28329	0	AT3G52810
chr3	20776200	20779199	3754	275	0	5.2679	0	AT3G55980
chr1	11711800	11712799	1361	100	0	5.25211	0	AT1G32440
chr2	18299800	18301599	2308	170	0	5.23917	0	AT2G44270
chr2	18299800	18301599	2308	170	0	5.23917	0	AT2G44280
chr2	4310800	4311999	1466	108	0	5.23825	0	AT2G10940
chr3	6899800	6901599	2181	161	0	5.22764	0	AT3G19850
chr2	18603600	18604999	1868	138	0	5.22365	0	AT2G45120
chr2	15082800	15084599	2571	190	0	5.22185	0	AT2G35930
chr4	14579600	14582599	3796	281	0	5.2131	0	AT4G29780
chr3	5109400	5111799	3182	237	0	5.18117	0	AT3G15170
chr1	7453400	7454999	2079	155	0	5.17605	0	AT1G21310
chr3	247600	250599	4241	317	0	5.1628	0	AT3G01670
chr4	10521200	10523599	3086	231	0	5.15537	0	AT4G19230
chr5	3890000	3891199	1456	109	0	5.15479	0	AT5G12050
chr3	3157400	3158199	946	71	0	5.14172	0	AT3G10200
chr3	9260400	9261399	1251	94	0	5.13577	0	AT3G25510
chr1	27645200	27646799	1687	127	0	5.1261	0	AT1G73530
chr1	27645200	27646799	1687	127	0	5.1261	0	AT1G73540
chr2	14080400	14082199	2377	179	0	5.12451	0	AT2G33230
chr3	10505800	10509399	4207	317	0	5.12141	0	AT3G28180
chr2	14422600	14423799	1362	103	0	5.10289	0	AT2G34150
chr2	14468400	14470199	2208	167	0	5.10221	0	AT2G34270
chr2	14468400	14470199	2208	167	0	5.10221	0	AT2G34260
chr1	23890600	23892199	2036	154	0	5.10191	0	AT1G64380
chr3	1436600	1438999	2934	223	0	5.07728	0	AT3G05140
chr2	9442800	9444599	2709	206	0	5.07479	0	AT2G22200
chr2	9442800	9444599	2709	206	0	5.07479	0	AT2G22201
chr4	11031800	11032799	1297	99	0	5.05569	0	AT4G20460
chr4	11031800	11032799	1297	99	0	5.05569	0	AT4G20470
chr3	19440600	19442599	2467	189	0	5.03713	0	AT3G52450
chr1	12090600	12092599	2404	185	0	5.01463	0	AT1G33360
chr1	12090600	12092599	2404	185	0	5.01463	0	AT1G33350
chr2	14282200	14283399	1438	111	0	4.99933	0	AT2G33770
chr4	10439600	10441599	2783	215	0	4.99518	0	AT4G19045
chr4	10439600	10441599	2783	215	0	4.99518	0	AT4G19050
chr1	24609400	24610399	1212	94	0	4.97566	0	AT1G66110
chr3	6419800	6421599	2611	203	0	4.96349	0	AT3G18660
chr1	9647000	9649199	2518	196	0	4.95765	0	AT1G27720
chr1	9647000	9649199	2518	196	0	4.95765	0	AT1G27730
chr1	7200400	7201399	1240	97	0	4.93317	0	AT1G20740
chr5	21419600	21421399	2377	186	0	4.93165	0	AT5G52860
chr2	18157400	18159799	3019	237	0	4.91576	0	AT2G43840
chr2	18157400	18159799	3019	237	0	4.91576	0	AT2G43850
chr1	29642000	29643599	1828	144	0	4.8988	0	AT1G78850
chr2	242000	243599	2227	176	0	4.88296	0	AT2G01540
chr4	186200	187599	1872	148	0	4.88113	0	AT4G00430
chr3	10589000	10590599	2196	174	0	4.87034	0	AT3G28340
chr1	3713200	3713799	656	52	1.1509e-227	4.86829	7.72141e-227	AT1G11112
chr2	14546000	14546999	1160	92	0	4.86571	0	AT2G34510
chr4	10610600	10611999	1361	108	0	4.86307	0	AT4G19460
chr1	29511800	29513199	1698	135	0	4.85378	0	AT1G78440
chr5	24046000	24048199	2337	186	0	4.84866	0	AT5G59680
chr3	15951800	15953199	1606	128	0	4.84185	0	AT3G44260
chr4	8949600	8950199	552	44	5.72388e-191	4.8413	3.20177e-190	AT4G15720
chr3	5025200	5025799	663	53	3.93403e-228	4.8274	2.6475e-227	AT3G14940
chr1	28740600	28741999	1723	138	0	4.81817	0	AT1G76590
chr1	215400	217599	2706	217	0	4.8122	0	AT1G01590
chr5	7838800	7840999	2643	212	0	4.81102	0	AT5G23270
chr1	17836600	17837799	1082	87	0	4.79937	0	AT1G48280
chr1	23410200	23411199	1169	94	0	4.79913	0	AT1G63120
chr1	27862800	27865799	4178	336	0	4.7985	0	AT1G74090
chr1	27862800	27865799	4178	336	0	4.7985	0	AT1G74100
chr2	16743000	16744199	1615	130	0	4.79408	0	AT2G40095
chr2	17990400	17992399	2306	186	0	4.78434	0	AT2G43280
chr2	17990400	17992399	2306	186	0	4.78434	0	AT2G43290
chr5	18584600	18585599	1029	83	0	4.78424	0	AT5G45810
chr4	13307000	13308199	1202	97	0	4.78199	0	AT4G26288
chr4	13307000	13308199	1202	97	0	4.78199	0	AT4G26290
chr4	13307000	13308199	1202	97	0	4.78199	0	AT4G26300
chr5	25995200	25996399	1222	99	0	4.76334	0	AT5G65070
chr5	20007400	20009199	2135	173	0	4.76242	0	AT5G49340
chr1	10996800	10997599	898	73	9.07939e-303	4.74711	8.56352e-302	AT1G30900
chr5	22865000	22866999	2410	196	0	4.74501	0	AT5G56460
chr4	14881600	14883399	2023	165	0	4.73138	0	AT4G30440
chr1	2927600	2930199	3210	262	0	4.72802	0	AT1G09070
chr1	2927600	2930199	3210	262	0	4.72802	0	AT1G09080
chr2	16444000	16445399	1590	130	0	4.71987	0	AT2G39370
chr2	11282200	11284199	2064	169	0	4.71302	0	AT2G26530
chr5	3524600	3526799	2709	222	0	4.70904	0	AT5G11090
chr5	15596400	15598199	2062	169	0	4.70845	0	AT5G38970
chr4	11245200	11246799	1593	131	0	4.69268	0	AT4G21065
chr4	1046000	1047199	1238	102	0	4.68378	0	AT4G02380
chr3	4973000	4974399	1644	136	0	4.66486	0	AT3G14810
chr4	15383200	15387599	4610	382	0	4.65708	0	AT4G31805
chr4	15383200	15387599	4610	382	0	4.65708	0	AT4G31810
chr4	15383200	15387599	4610	382	0	4.65708	0	AT4G31800
chr5	21240600	21243599	3747	311	0	4.64943	0	AT5G52310
chr5	20884600	20887199	2598	216	0	4.64153	0	AT5G51420
chr5	20884600	20887199	2598	216	0	4.64153	0	AT5G51430
chr4	8827400	8828599	1371	114	0	4.64097	0	AT4G15430
chr5	17864400	17865799	1575	131	0	4.63965	0	AT5G44350
chr2	12834800	12835999	1320	110	0	4.63081	0	AT2G30070
chr4	9752600	9753999	1428	119	0	4.63081	0	AT4G17490
chr1	26701800	26706199	4936	413	0	4.61213	0	AT1G70790
chr1	26701800	26706199	4936	413	0	4.61213	0	AT1G70800
chr1	26701800	26706199	4936	413	0	4.61213	0	AT1G70810
chr1	26701800	26706199	4936	413	0	4.61213	0	AT1G70820
chr2	18440800	18443599	3344	281	0	4.59236	0	AT2G44735
chr2	18440800	18443599	3344	281	0	4.59236	0	AT2G44740
chr3	19713800	19714799	952	80	5.31654232775e-310	4.59222	0	AT3G53190
chr2	7512800	7514399	1879	159	0	4.56043	0	AT2G17280
chr3	21628000	21629599	1712	145	0	4.55629	0	AT3G58480
chr3	21628000	21629599	1712	145	0	4.55629	0	AT3G58470
chr3	18929800	18931799	2474	210	0	4.54628	0	AT3G50930
chr2	15972800	15974399	1825	155	0	4.54367	0	AT2G38120
chr2	14010800	14014999	4674	397	0	4.54333	0	AT2G33010
chr2	14010800	14014999	4674	397	0	4.54333	0	AT2G33020
chr1	28163400	28164799	1694	144	0	4.5397	0	AT1G75000
chr1	3350000	3353399	3546	302	0	4.53114	0	AT1G10210
chr1	3350000	3353399	3546	302	0	4.53114	0	AT1G10220
chr4	17516600	17518599	2618	223	0	4.53044	0	AT4G37225
chr4	17516600	17518599	2618	223	0	4.53044	0	AT4G37230
chr4	17516600	17518599	2618	223	0	4.53044	0	AT4G37235
chr5	24701200	24702799	1972	168	0	4.52974	0	AT5G61430
chr5	22519600	22521799	2359	201	0	4.52906	0	AT5G55590
chr2	19057800	19059599	2063	176	0	4.52337	0	AT2G46430
chr2	10328800	10329999	1170	100	0	4.51504	0	AT2G24270
chr4	685800	687999	2047	175	0	4.51394	0	AT4G01580
chr1	5596600	5600799	4631	396	0	4.5129	0	AT1G16370
chr1	5596600	5600799	4631	396	0	4.5129	0	AT1G16380
chr1	4466400	4468999	2688	230	0	4.51001	0	AT1G13110
chr4	12686200	12689599	3703	317	0	4.50786	0	AT4G24565
chr4	12686200	12689599	3703	317	0	4.50786	0	AT4G24570
chr4	12686200	12689599	3703	317	0	4.50786	0	AT4G24580
chr3	4831000	4833799	3643	312	0	4.50589	0	AT3G14440
chr4	844200	846799	2562	220	0	4.49399	0	AT4G01950
chr4	11155200	11159799	5301	456	0	4.4861	0	AT4G20840
chr4	11155200	11159799	5301	456	0	4.4861	0	AT4G20830
chr3	11165800	11166599	1091	94	0	4.47892	0	AT3G29200
chr1	3577000	3578799	1774	153	0	4.47443	0	AT1G10750
chr1	7850000	7851599	1819	157	0	4.47105	0	AT1G22230
chr4	1250000	1251999	2223	192	0	4.46801	0	AT4G02800
chr2	19154400	19155399	1041	90	0	4.46359	0	AT2G46660
chr5	20993400	20995199	2509	217	0	4.46187	0	AT5G51670
chr1	21887600	21889999	2561	222	0	4.45177	0	AT1G59590
chr1	21887600	21889999	2561	222	0	4.45177	0	AT1G59600
chr1	2189800	2190799	1038	90	0	4.45073	0	AT1G07135
chr1	10895800	10896999	1395	121	0	4.44903	0	AT1G30710
chr2	13798800	13799999	1371	119	0	4.44597	0	AT2G32510
chr3	22228000	22229399	1725	150	0	4.43786	0	AT3G60160
chr2	7494600	7495999	1639	143	0	4.42302	0	AT2G17230
chr4	18410000	18411199	1008	88	0	4.42032	0	AT4G39670
chr3	4877800	4882199	4868	428	0	4.38917	0	AT3G14520
chr3	4877800	4882199	4868	428	0	4.38917	0	AT3G14530
chr3	4877800	4882199	4868	428	0	4.38917	0	AT3G14540
chr4	12777200	12778599	1373	121	0	4.37886	0	AT4G24790
chr1	24528200	24529399	1347	119	0	4.36814	0	AT1G65920
chr2	16108200	16111799	4073	360	0	4.36604	0	AT2G38470
chr2	16108200	16111799	4073	360	0	4.36604	0	AT2G38480
chr2	12887800	12889999	2250	199	0	4.3632	0	AT2G30210
chr1	9259400	9260999	1701	151	0	4.34714	0	AT1G26770
chr1	9806200	9806999	785	70	2.08395e-240	4.32761	1.49356e-239	AT1G28110
chr3	1104400	1106599	2273	203	0	4.32095	0	AT3G04200
chr3	1104400	1106599	2273	203	0	4.32095	0	AT3G04210
chr1	28179800	28181199	1488	133	0	4.31745	0	AT1G75050
chr3	498800	499999	1219	109	0	4.31572	0	AT3G02420
chr3	498800	499999	1219	109	0	4.31572	0	AT3G02430
chr3	17935000	17941999	9213	824	0	4.31469	0	AT3G48440
chr3	17935000	17941999	9213	824	0	4.31469	0	AT3G48430
chr5	17097800	17099599	1956	175	0	4.31327	0	AT5G42650
chr1	5726600	5728999	2544	228	0	4.30584	0	AT1G16730
chr1	5726600	5728999	2544	228	0	4.30584	0	AT1G16740
chr1	10663200	10664599	1650	148	0	4.30228	0	AT1G30280
chr1	10663200	10664599	1650	148	0	4.30228	0	AT1G30282
chr4	349000	351199	2486	223	0	4.30202	0	AT4G00820
chr1	29364400	29366399	2430	218	0	4.30156	0	AT1G78080
chr3	6020200	6021799	1301	117	0	4.29109	0	AT3G17600
chr4	13445000	13445599	533	48	2.20492e-162	4.28511	1.05756e-161	AT4G26650
chr4	5992800	5994199	1610	145	0	4.28483	0	AT4G09460
chr1	3484600	3486799	2642	238	0	4.28383	0	AT1G10560
chr2	17521800	17522999	1275	115	0	4.27847	0	AT2G41970
chr3	9722000	9723799	2006	181	0	4.27689	0	AT3G26520
chr4	7068400	7069399	951	86	3.51411e-286	4.26735	3.11868e-285	AT4G11730
chr2	7898000	7899399	1636	148	0	4.26577	0	AT2G18160
chr2	7898000	7899399	1636	148	0	4.26577	0	AT2G18162
chr5	2938200	2939599	1470	133	0	4.26522	0	AT5G09440
chr2	15192400	15194199	1978	179	0	4.26431	0	AT2G36220
chr2	15192400	15194199	1978	179	0	4.26431	0	AT2G36230
chr4	10875200	10876199	839	76	2.39996e-252	4.26015	1.80152e-251	AT4G20110
chr5	25721800	25723199	1478	134	0	4.25643	0	AT5G64310
chr4	12386600	12387399	713	65	2.29817e-213	4.23304	1.43677e-212	AT4G23780
chr3	16932000	16933399	1345	123	0	4.21981	0	AT3G46110
chr1	3252400	3255399	3225	295	0	4.21875	0	AT1G09970
chr5	18035400	18037399	2294	210	0	4.21551	0	AT5G44700
chr4	1155800	1158199	2620	240	0	4.21275	0	AT4G02640
chr4	1155800	1158199	2620	240	0	4.21275	0	AT4G02650
chr1	29833800	29835599	1812	166	0	4.21237	0	AT1G79310
chr1	3549800	3550999	1233	113	0	4.21076	0	AT1G10690
chr3	17504000	17506199	2335	214	0	4.21065	0	AT3G47500
chr2	19608000	19611399	3566	327	0	4.20833	0	AT2G47890
chr2	19608000	19611399	3566	327	0	4.20833	0	AT2G47895
chr2	19608000	19611399	3566	327	0	4.20833	0	AT2G47900
chr4	16661400	16662599	1427	131	0	4.20367	0	AT4G34990
chr1	29539400	29540799	1416	130	0	4.20335	0	AT1G78530
chr5	22439400	22444199	4542	417	0	4.20327	0	AT5G55340
chr5	22439400	22444199	4542	417	0	4.20327	0	AT5G55350
chr5	22439400	22444199	4542	417	0	4.20327	0	AT5G55360
chr1	6622000	6625799	4204	386	0	4.20292	0	AT1G19180
chr1	6622000	6625799	4204	386	0	4.20292	0	AT1G19190
chr1	6622000	6625799	4204	386	0	4.20292	0	AT1G19200
chr3	17974600	17976799	2361	217	0	4.19868	0	AT3G48515
chr3	17974600	17976799	2361	217	0	4.19868	0	AT3G48520
chr5	25296000	25297199	1098	101	0	4.19524	0	AT5G63060
chr1	26412800	26415599	2966	273	0	4.19261	0	AT1G70140
chr1	7084200	7085799	1693	156	0	4.18802	0	AT1G20440
chr4	2587200	2589599	2655	245	0	4.18191	0	AT4G05050
chr3	7794800	7796399	1939	179	0	4.18024	0	AT3G22120
chr3	7794800	7796399	1939	179	0	4.18024	0	AT3G22121
chr1	9956000	9956999	1082	100	0	4.17545	0	AT1G28370
chr1	21343800	21345999	2119	196	0	4.17206	0	AT1G57620
chr1	21343800	21345999	2119	196	0	4.17206	0	AT1G57630
chr5	3170600	3171999	1372	127	0	4.16895	0	AT5G10120
chr5	3170600	3171999	1372	127	0	4.16895	0	AT5G10130
chr3	23380400	23381599	1220	113	0	4.16637	0	AT3G63280
chr2	14958800	14960599	1755	163	0	4.15495	0	AT2G35615
chr2	15104400	15105799	1485	138	0	4.15263	0	AT2G35950
chr1	28247800	28250599	3271	304	0	4.15225	0	AT1G75260
chr1	28247800	28250599	3271	304	0	4.15225	0	AT1G75270
chr1	4274600	4275799	1129	105	0	4.14936	0	AT1G12550
chr3	509000	511799	2932	273	0	4.14455	0	AT3G02468
chr3	509000	511799	2932	273	0	4.14455	0	AT3G02470
chr1	25013200	25014199	923	86	1.07875e-268	4.14171	8.76173e-268	AT1G67025
chr1	29075400	29077599	2134	199	0	4.13826	0	AT1G77380
chr1	9285000	9286599	1383	129	0	4.13722	0	AT1G26800
chr1	4289800	4291199	1211	113	0	4.13563	0	AT1G12610
chr5	3017400	3018399	1113	104	0	4.12988	0	AT5G09730
chr2	9841800	9842799	822	77	3.71409e-238	4.11962	2.638e-237	AT2G23118
chr2	9841800	9842799	822	77	3.71409e-238	4.11962	2.638e-237	AT2G23120
chr2	13554800	13557599	3019	283	0	4.11673	0	AT2G31880
chr2	13554800	13557599	3019	283	0	4.11673	0	AT2G31890
chr1	21520000	21522399	2982	280	0	4.10985	0	AT1G58120
chr1	21520000	21522399	2982	280	0	4.10985	0	AT1G58122
chr1	4140000	4141399	1147	108	0	4.09841	0	AT1G12200
chr1	4140000	4141399	1147	108	0	4.09841	0	AT1G12210
chr4	10974400	10976199	1869	176	0	4.09801	0	AT4G20320
chr1	28746800	28748199	1284	121	0	4.09502	0	AT1G76600
chr2	12814200	12816599	2886	272	0	4.09452	0	AT2G30020
chr1	21316600	21318199	1018	96	5.14425e-292	4.09216	4.68955e-291	AT1G57560
chr5	8773600	8775799	2724	257	0	4.09025	0	AT5G25280
chr3	18891000	18892599	1461	138	0	4.08552	0	AT3G50820
chr1	26239600	26240799	1143	108	0	4.08412	0	AT1G69760
chr4	1414800	1418399	3213	304	0	4.07862	0	AT4G03205
chr4	1414800	1418399	3213	304	0	4.07862	0	AT4G03210
chr4	1414800	1418399	3213	304	0	4.07862	0	AT4G03220
chr3	907400	908999	1721	163	0	4.07445	0	AT3G03680
chr2	9924800	9926599	1992	189	0	4.06728	0	AT2G23320
chr2	9924800	9926599	1992	189	0	4.06728	0	AT2G23321
chr4	16694000	16695599	1675	159	0	4.06531	0	AT4G35070
chr5	14933400	14935999	2705	257	0	4.06172	0	AT5G37600
chr4	15289800	15291599	1757	167	0	4.06005	0	AT4G31550
chr5	21743000	21745999	2839	270	0	4.05768	0	AT5G53520
chr1	19737200	19737799	557	53	2.04297e-159	4.0556	9.64488e-159	AT1G52980
chr1	4758400	4759999	1438	137	0	4.05055	0	AT1G13920
chr3	5121200	5123599	2434	232	0	4.04863	0	AT3G15210
chr5	513200	514999	1975	189	0	4.03256	0	AT5G02400
chr1	1303600	1305999	2278	218	0	4.03249	0	AT1G04680
chr3	21721400	21722599	1139	109	0	4.03249	0	AT3G58740
chr1	19057200	19061399	3990	382	0	4.03075	0	AT1G51405
chr1	19057200	19061399	3990	382	0	4.03075	0	AT1G51410
chr1	24677000	24678199	1034	99	2.05706e-291	4.03052	1.86937e-290	AT1G66230
chr1	30383600	30386399	2902	278	0	4.02836	0	AT1G80840
chr1	30383600	30386399	2902	278	0	4.02836	0	AT1G80850
chr5	7559000	7560199	1418	136	0	4.02359	0	AT5G22740
chr3	3442400	3443999	1522	146	0	4.02289	0	AT3G10985
chr1	27308600	27313199	4427	425	0	4.01973	0	AT1G72530
chr1	27308600	27313199	4427	425	0	4.01973	0	AT1G72520
chr1	24848000	24849599	1583	152	0	4.01896	0	AT1G66600
chr5	2958400	2961399	3424	329	0	4.01619	0	AT5G09520
chr5	2958400	2961399	3424	329	0	4.01619	0	AT5G09530
chr5	21079400	21081399	2287	220	0	4.01162	0	AT5G51850
chr4	13154600	13155999	1599	154	0	4.00686	0	AT4G25885
chr4	13154600	13155999	1599	154	0	4.00686	0	AT4G25880
chr3	17177400	17180199	2667	257	0	4.00466	0	AT3G46620
chr4	11172600	11175199	2640	255	0	3.99521	0	AT4G20870
chr4	11172600	11175199	2640	255	0	3.99521	0	AT4G20860
chr2	10846800	10850599	3838	371	0	3.99215	0	AT2G25490
chr4	8709600	8711999	2162	209	0	3.99195	0	AT4G15250
chr5	17882200	17883399	1219	118	0	3.98655	0	AT5G44390
chr1	7384400	7386399	2084	202	0	3.98128	0	AT1G21090
chr2	13751200	13752399	1072	104	2.09662e-297	3.97775	1.94177e-296	AT2G32390
chr4	522400	524399	2080	202	0	3.97364	0	AT4G01250
chr4	6441600	6443799	2368	230	0	3.9731	0	AT4G10390
chr5	24211400	24215799	4571	444	0	3.97287	0	AT5G60120
chr5	24211400	24215799	4571	444	0	3.97287	0	AT5G60130
chr5	24211400	24215799	4571	444	0	3.97287	0	AT5G60140
chr1	26122000	26123399	1575	153	0	3.97251	0	AT1G69490
chr2	7255400	7256799	1295	126	0	3.96621	0	AT2G16720
chr1	22867600	22871399	3318	323	0	3.96415	0	AT1G61890
chr2	18285000	18288199	2988	291	0	3.96245	0	AT2G44230
chr2	18285000	18288199	2988	291	0	3.96245	0	AT2G44220
chr3	9892600	9893799	1138	111	0	3.95636	0	AT3G26840
chr5	19253200	19255999	2624	256	0	3.95549	0	AT5G47460
chr5	19253200	19255999	2624	256	0	3.95549	0	AT5G47470
chr5	6975200	6975999	891	87	8.34984e-246	3.95216	6.09454e-245	AT5G20630
chr3	16896000	16898399	2487	243	0	3.94953	0	AT3G45970
chr3	16896000	16898399	2487	243	0	3.94953	0	AT3G45980
chr1	2327600	2330199	2142	210	0	3.93619	0	AT1G07560
chr3	6402800	6403399	561	55	4.58625e-155	3.93619	2.09372e-154	AT3G18600
chr3	16984200	16985199	1030	101	2.76667e-282	3.93543	2.40634e-281	AT3G46230
chr4	9743600	9744799	1152	113	0	3.93414	0	AT4G17470
chr5	24774800	24776399	1658	163	0	3.9253	0	AT5G61640
chr5	21793800	21795999	2441	240	0	3.92494	0	AT5G53660
chr3	5692800	5694599	2033	200	0	3.92268	0	AT3G16720
chr1	19667000	19669399	2458	242	0	3.91961	0	AT1G52810
chr1	19667000	19669399	2458	242	0	3.91961	0	AT1G52820
chr4	916000	916599	538	53	5.60432e-148	3.91726	2.45806e-147	AT4G02075
chr5	16431600	16434599	3186	314	0	3.91554	0	AT5G41050
chr5	16431600	16434599	3186	314	0	3.91554	0	AT5G41040
chr4	13015000	13016399	1531	151	0	3.91268	0	AT4G25470
chr1	1994400	1996599	2331	230	0	3.91102	0	AT1G06520
chr1	6832200	6836599	4692	463	0	3.91069	0	AT1G19770
chr1	6832200	6836599	4692	463	0	3.91069	0	AT1G19780
chr5	23476600	23478799	2199	217	0	3.91058	0	AT5G58000
chr4	16521800	16523199	1459	144	0	3.90993	0	AT4G34588
chr4	16521800	16523199	1459	144	0	3.90993	0	AT4G34590
chr5	23342000	23343599	1712	169	0	3.90925	0	AT5G57630
chr3	21346000	21346799	759	75	7.13596e-207	3.90532	4.32174e-206	AT3G57640
chr3	21346000	21346799	759	75	7.13596e-207	3.90532	4.32174e-206	AT3G57645
chr5	23147600	23150199	2732	270	0	3.90475	0	AT5G57130
chr5	23147600	23150199	2732	270	0	3.90475	0	AT5G57140
chr5	6902400	6904199	2054	203	0	3.90463	0	AT5G20420
chr3	6802600	6804199	1790	177	0	3.90262	0	AT3G19580
chr4	16447400	16448799	1324	131	0	3.90025	0	AT4G34400
chr1	1635200	1637999	2405	238	0	3.89955	0	AT1G05520
chr1	1635200	1637999	2405	238	0	3.89955	0	AT1G05530
chr1	2254800	2256599	1827	181	0	3.89526	0	AT1G07340
chr3	22975000	22976399	1211	120	0	3.89439	0	AT3G62030
chr3	22975000	22976399	1211	120	0	3.89439	0	AT3G62040
chr4	16560000	16562999	3192	317	0	3.88579	0	AT4G34710
chr3	22906800	22907999	1287	128	0	3.88011	0	AT3G61880
chr2	14602400	14603399	633	63	1.59438e-171	3.87739	8.02716e-171	AT2G34660
chr2	9538000	9538999	944	94	2.92195e-254	3.87543	2.21048e-253	AT2G22470
chr1	5638800	5639999	974	97	3.29185e-262	3.87492	2.59155e-261	AT1G16500
chr5	23310200	23315399	4943	494	0	3.86135	0	AT5G57565
chr5	23310200	23315399	4943	494	0	3.86135	0	AT5G57567
chr5	23310200	23315399	4943	494	0	3.86135	0	AT5G57570
chr5	23310200	23315399	4943	494	0	3.86135	0	AT5G57580
chr1	5137000	5137799	720	72	1.30352e-193	3.85901	7.38153e-193	AT1G14890
chr5	8496600	8497599	560	56	3.34862e-151	3.85901	1.49811e-150	AT5G24760
chr4	6491000	6491799	909	91	2.26183e-243	3.85477	1.63856e-242	AT4G10500
chr5	26878200	26879799	1597	160	0	3.85178	0	AT5G67370
chr5	25525800	25527999	1996	200	0	3.85129	0	AT5G63790
chr5	25525800	25527999	1996	200	0	3.85129	0	AT5G63780
chr4	700400	701999	1206	121	0	3.84625	0	AT4G01630
chr3	933600	934599	897	90	1.50274e-239	3.84615	1.07171e-238	AT3G03726
chr4	14256400	14257799	1174	118	0	3.83939	0	AT4G28890
chr1	19774200	19776999	2915	293	0	3.83925	0	AT1G53060
chr1	19774200	19776999	2915	293	0	3.83925	0	AT1G53050
chr3	8587800	8589799	2357	237	0	3.83784	0	AT3G23810
chr5	18546000	18547599	1064	107	7.81363e-283	3.83737	6.83007e-282	AT5G45720
chr1	435200	436999	1718	173	0	3.83224	0	AT1G02230
chr2	8470400	8471599	1281	129	0	3.83209	0	AT2G19572
chr2	8470400	8471599	1281	129	0	3.83209	0	AT2G19570
chr5	5718600	5719599	981	99	6.90498e-260	3.82393	5.37774e-259	AT5G17350
chr4	57200	59399	2170	219	0	3.82377	0	AT4G00150
chr3	22160600	22162399	1833	185	0	3.82355	0	AT3G60000
chr1	707400	713199	5564	562	0	3.82056	0	AT1G03050
chr1	707400	713199	5564	562	0	3.82056	0	AT1G03055
chr1	707400	713199	5564	562	0	3.82056	0	AT1G03060
chr1	340000	341999	2135	216	0	3.81435	0	AT1G01970
chr1	340000	341999	2135	216	0	3.81435	0	AT1G01980
chr1	24517200	24518599	1492	151	0	3.81301	0	AT1G65900
chr4	10890400	10892199	1746	177	0	3.80669	0	AT4G20160
chr5	989200	990799	1706	173	0	3.80548	0	AT5G03760
chr5	21138800	21140599	1783	181	0	3.80145	0	AT5G52050
chr4	12526200	12527399	1103	112	1.13997e-289	3.80044	1.02951e-288	AT4G24120
chr3	21059800	21062399	2412	245	0	3.79916	0	AT3G56880
chr3	19081000	19082599	1447	147	0	3.79863	0	AT3G51410
chr4	6864000	6866399	2033	207	0	3.79003	0	AT4G11280
chr1	29235600	29239399	3953	403	0	3.78528	0	AT1G77760
chr1	7088000	7089399	1616	165	0	3.77949	0	AT1G20450
chr3	4078200	4079599	1125	115	5.54816e-293	3.77512	5.07368e-292	AT3G12830
chr1	2238000	2241599	3025	310	0	3.76565	0	AT1G07280
chr5	18388200	18389199	1014	104	2.82503e-263	3.76254	2.23616e-262	AT5G45370
chr5	9546600	9547999	1394	143	0	3.76186	0	AT5G27130
chr1	9469600	9475199	5143	528	0	3.75888	0	AT1G27250
chr1	9469600	9475199	5143	528	0	3.75888	0	AT1G27270
chr1	9469600	9475199	5143	528	0	3.75888	0	AT1G27280
chr1	9469600	9475199	5143	528	0	3.75888	0	AT1G27260
chr2	9563200	9564799	1529	157	0	3.75823	0	AT2G22500
chr1	28645400	28646799	1305	134	0	3.75822	0	AT1G76360
chr5	21428200	21429599	1499	154	0	3.75627	0	AT5G52870
chr1	25815000	25816599	1557	160	0	3.7553	0	AT1G68740
chr4	6306000	6307999	1682	173	0	3.75194	0	AT4G10090
chr5	16562600	16563799	1400	144	0	3.75182	0	AT5G41380
chr4	12005000	12007599	2245	231	0	3.75042	0	AT4G22880
chr4	12005000	12007599	2245	231	0	3.75042	0	AT4G22890
chr4	10388800	10391999	2866	295	0	3.74913	0	AT4G18970
chr4	10388800	10391999	2866	295	0	3.74913	0	AT4G18975
chr2	14016200	14018399	1787	184	0	3.74785	0	AT2G33020
chr2	14016200	14018399	1787	184	0	3.74785	0	AT2G33030
chr4	18571400	18573399	2049	211	0	3.74745	0	AT4G40060
chr2	2269000	2272399	3451	356	0	3.74086	0	AT2G05920
chr1	10537600	10538799	1076	111	3.28648e-277	3.74081	2.77267e-276	AT1G30040
chr5	23373600	23374999	1395	144	0	3.73842	0	AT5G57690
chr5	23373600	23374999	1395	144	0	3.73842	0	AT5G57700
chr5	1129600	1130999	1490	154	0	3.73372	0	AT5G04140
chr3	18709000	18711599	2331	241	0	3.73251	0	AT3G50420
chr3	18709000	18711599	2331	241	0	3.73251	0	AT3G50410
chr1	28143800	28145399	1557	161	0	3.73198	0	AT1G74929
chr1	28143800	28145399	1557	161	0	3.73198	0	AT1G74930
chr1	907600	908999	1139	118	9.9367e-292	3.72493	9.03949e-291	AT1G03630
chr1	29636600	29638599	1920	199	0	3.72327	0	AT1G78830
chr3	15354600	15355399	598	62	2.39655e-154	3.72208	1.08894e-153	AT3G43430
chr2	14199800	14200799	887	92	1.74073e-227	3.72059	1.16606e-226	AT2G33530
chr5	26073800	26074599	877	91	7.72233e-225	3.71907	5.12568e-224	AT5G65240
chr1	1973000	1974599	1513	157	0	3.71891	0	AT1G06470
chr1	1973000	1974599	1513	157	0	3.71891	0	AT1G06475
chr4	13872600	13876599	3633	377	0	3.71878	0	AT4G27850
chr4	13872600	13876599	3633	377	0	3.71878	0	AT4G27852
chr4	13872600	13876599	3633	377	0	3.71878	0	AT4G27860
chr2	7635000	7637999	2861	297	0	3.71738	0	AT2G17550
chr5	1085600	1086799	1098	114	1.42756e-280	3.71684	1.21973e-279	AT5G04020
chr1	8281200	8282399	1242	129	0	3.71542	0	AT1G23330
chr1	1482400	1483799	1309	136	0	3.7143	0	AT1G05140
chr4	7265800	7267399	1694	176	0	3.7143	0	AT4G12130
chr4	7265800	7267399	1694	176	0	3.7143	0	AT4G12140
chr5	9229400	9230199	539	56	4.99391e-139	3.7143	2.08139e-138	AT5G26300
chr4	18478800	18481199	2127	221	0	3.71408	0	AT4G39830
chr5	24973200	24975599	2521	262	0	3.71319	0	AT5G62170
chr3	22847400	22848799	1270	132	0	3.71284	0	AT3G61730
chr1	3187000	3188199	1163	121	3.04635e-296	3.70912	2.81537e-295	AT1G09812
chr1	18499400	18501399	2037	212	0	3.70793	0	AT1G49960
chr1	28895400	28896999	1498	156	0	3.70564	0	AT1G76930
chr2	19600000	19602399	2170	226	0	3.70533	0	AT2G47860
chr3	22805200	22806399	892	93	2.79302e-227	3.70133	1.86808e-226	AT3G61630
chr3	22650200	22651399	805	84	3.58908e-205	3.69822	2.14975e-204	AT3G61190
chr1	9407000	9408799	1791	187	0	3.69598	0	AT1G27100
chr3	5951600	5953999	2279	238	0	3.69525	0	AT3G17380
chr3	5951600	5953999	2279	238	0	3.69525	0	AT3G17390
chr3	18896600	18898599	2020	211	0	3.69441	0	AT3G50835
chr3	18896600	18898599	2020	211	0	3.69441	0	AT3G50840
chr3	21948400	21949799	1262	132	0	3.68945	0	AT3G59400
chr5	21294000	21295199	1051	110	5.27328e-266	3.68711	4.23174e-265	AT5G52470
chr3	5573600	5577399	3506	367	0	3.68656	0	AT3G16410
chr5	25396800	25398399	1690	177	0	3.68459	0	AT5G63410
chr1	26172000	26173599	1451	152	0	3.68383	0	AT1G69580
chr5	16156400	16157999	1365	143	0	3.6836	0	AT5G40384
chr1	614000	616599	2376	249	0	3.68233	0	AT1G02800
chr2	15354800	15355399	496	52	9.97446e-127	3.6809	3.84125e-126	AT2G36630
chr5	23299000	23308399	8556	897	0	3.6809	0	AT5G57530
chr5	23299000	23308399	8556	897	0	3.6809	0	AT5G57535
chr5	23299000	23308399	8556	897	0	3.6809	0	AT5G57540
chr5	23299000	23308399	8556	897	0	3.6809	0	AT5G57550
chr5	23299000	23308399	8556	897	0	3.6809	0	AT5G57560
chr5	24386200	24387399	1342	141	0	3.6729	0	AT5G60680
chr5	22418800	22419999	1179	124	3.12871e-296	3.66917	2.88843e-295	AT5G55260
chr5	22418800	22419999	1179	124	3.12871e-296	3.66917	2.88843e-295	AT5G55270
chr3	18546400	18547999	1758	185	0	3.6671	0	AT3G50030
chr3	19473400	19474599	988	104	1.94331e-248	3.66606	1.43525e-247	AT3G52520
chr5	24766400	24767599	1273	134	0	3.66606	0	AT5G61600
chr5	26244800	26246399	1197	126	2.17757e-300	3.66606	2.03621e-299	AT5G65660
chr5	26529800	26531199	1415	149	0	3.66477	0	AT5G66440
chr1	29009000	29010999	2068	218	0	3.66075	0	AT1G77210
chr5	25298600	25299799	977	103	3.14182e-245	3.66044	2.28938e-244	AT5G63070
chr3	19264800	19269599	4403	465	0	3.65403	0	AT3G51910
chr3	19264800	19269599	4403	465	0	3.65403	0	AT3G51920
chr3	19264800	19269599	4403	465	0	3.65403	0	AT3G51915
chr2	1005800	1007199	1221	129	6.20398e-305	3.6526	5.88331e-304	AT2G03310
chr3	7626000	7629399	2951	312	0	3.64998	0	AT3G21660
chr3	7626000	7629399	2951	312	0	3.64998	0	AT3G21670
chr1	7836400	7837799	1447	153	0	3.64967	0	AT1G22190
chr1	7836400	7837799	1447	153	0	3.64967	0	AT1G22200
chr4	11590800	11592199	1105	117	1.79197e-275	3.64462	1.49732e-274	AT4G21850
chr5	259400	261399	1700	180	0	3.64462	0	AT5G01690
chr5	259400	261399	1700	180	0	3.64462	0	AT5G01700
chr1	18822000	18822999	831	88	7.87172e-208	3.64413	4.794e-207	AT1G50780
chr4	5792000	5793399	1237	131	5.73612e-308	3.64397	5.48741e-307	AT4G09030
chr1	20142800	20144199	1114	118	1.48994e-277	3.64317	1.25944e-276	AT1G53935
chr1	20142800	20144199	1114	118	1.48994e-277	3.64317	1.25944e-276	AT1G53940
chr4	7014000	7015399	1161	123	4.44586e-289	3.64253	4.00265e-288	AT4G11610
chr4	10823400	10824399	991	105	3.89376e-247	3.64217	2.86123e-246	AT4G19970
chr4	16310600	16312199	1311	139	0	3.63969	0	AT4G34050
chr1	24810800	24812799	1866	198	0	3.63683	0	AT1G66500
chr2	11752600	11753799	1243	132	2.30804e-308	3.6339	2.2177e-307	AT2G27500
chr2	18374200	18376999	2711	288	0	3.63256	0	AT2G44500
chr5	7182400	7183999	1289	137	0	3.63085	0	AT5G21120
chr5	26128200	26129399	903	96	1.7717e-224	3.62988	1.17061e-223	AT5G65390
chr2	11833000	11834399	1345	143	0	3.62963	0	AT2G27770
chr4	16451400	16453999	2464	262	0	3.62924	0	AT4G34410
chr4	16451400	16453999	2464	262	0	3.62924	0	AT4G34412
chr4	151800	153799	1747	186	0	3.62457	0	AT4G00342
chr4	151800	153799	1747	186	0	3.62457	0	AT4G00350
chr2	17886400	17888799	1755	187	0	3.62169	0	AT2G43010
chr5	16026000	16027999	1914	204	0	3.62066	0	AT5G40030
chr4	17150600	17153599	3029	323	0	3.61887	0	AT4G36250
chr5	6285200	6287399	1903	203	0	3.61759	0	AT5G18840
chr5	6285200	6287399	1903	203	0	3.61759	0	AT5G18850
chr1	555400	556399	862	92	2.37024e-213	3.61573	1.48076e-212	AT1G02610
chr5	3545000	3547199	1667	178	0	3.61403	0	AT5G11140
chr5	3545000	3547199	1667	178	0	3.61403	0	AT5G11150
chr1	4781600	4782799	1030	110	3.52523e-254	3.61344	2.66456e-253	AT1G13970
chr1	692200	696399	4266	456	0	3.61021	0	AT1G03010
chr1	692200	696399	4266	456	0	3.61021	0	AT1G03000
chr1	20782000	20783999	2376	254	0	3.60985	0	AT1G55610
chr1	23044400	23045599	1169	125	1.22117e-287	3.60895	1.09378e-286	AT1G62320
chr3	6696200	6699799	3095	331	0	3.60835	0	AT3G19310
chr3	6696200	6699799	3095	331	0	3.60835	0	AT3G19320
chr3	6696200	6699799	3095	331	0	3.60835	0	AT3G19330
chr1	19580000	19580799	728	78	9.93067e-180	3.60174	5.25157e-179	AT1G52565
chr4	14825200	14827199	1661	178	0	3.60102	0	AT4G30280
chr1	2949800	2950999	914	98	9.93109e-225	3.59912	6.57171e-224	AT1G09155
chr4	16639600	16641799	2117	227	0	3.59891	0	AT4G34940
chr5	3267000	3270999	3777	405	0	3.59889	0	AT5G10370
chr5	3267000	3270999	3777	405	0	3.59889	0	AT5G10380
chr5	3267000	3270999	3777	405	0	3.59889	0	AT5G10390
chr5	3267000	3270999	3777	405	0	3.59889	0	AT5G10400
chr5	21055600	21056799	1268	136	1.53137056068e-310	3.59796	0	AT5G51810
chr3	5337600	5338399	829	89	9.32667e-204	3.59452	5.53315e-203	AT3G15760
chr4	11958200	11958999	689	74	1.00322e-169	3.59305	5.00749e-169	AT4G22758
chr3	22393600	22395199	1564	168	0	3.59256	0	AT3G60580
chr5	22221600	22221999	391	42	1.85485e-97	3.59256	5.76498e-97	AT5G54690
chr5	25506000	25509999	3435	369	0	3.59233	0	AT5G63720
chr5	25506000	25509999	3435	369	0	3.59233	0	AT5G63730
chr1	17179200	17180199	930	100	8.79615e-228	3.58888	5.90589e-227	AT1G45474
chr1	91200	92199	883	95	2.95923e-216	3.58685	1.88246e-215	AT1G01220
chr1	28782800	28785399	2370	255	0	3.58661	0	AT1G76700
chr5	1912800	1914399	1589	171	0	3.58595	0	AT5G06270
chr4	1003600	1005399	1700	183	0	3.58487	0	AT4G02290
chr5	16722400	16724799	1830	197	0	3.58477	0	AT5G41780
chr1	20912200	20913599	1189	128	5.44637e-290	3.58466	4.92888e-289	AT1G55920
chr1	21439800	21442999	2989	322	0	3.58217	0	AT1G57980
chr1	21439800	21442999	2989	322	0	3.58217	0	AT1G57990
chr1	11114200	11115999	1809	195	0	3.57997	0	AT1G31130
chr3	4309800	4311399	1493	161	0	3.57857	0	AT3G13310
chr3	4309800	4311399	1493	161	0	3.57857	0	AT3G13300
chr4	7318800	7319799	686	74	4.66137e-168	3.57741	2.30817e-167	AT4G12330
chr1	2551200	2552599	1251	135	5.13689e-304	3.57602	4.8608e-303	AT1G08135
chr1	2551200	2552599	1251	135	5.13689e-304	3.57602	4.8608e-303	AT1G08140
chr5	22156600	22159599	2603	281	0	3.57474	0	AT5G54540
chr5	22156600	22159599	2603	281	0	3.57474	0	AT5G54550
chr1	8147600	8151999	3829	414	0	3.56912	0	AT1G23010
chr1	8147600	8151999	3829	414	0	3.56912	0	AT1G23020
chr1	6801800	6802999	1008	109	7.2163e-245	3.5687	5.24959e-244	AT1G19660
chr3	8603600	8605999	2265	245	0	3.56762	0	AT3G23820
chr5	8622000	8622399	379	41	1.05269e-93	3.56723	3.18549e-93	AT5G25040
chr2	11860400	11861399	1063	115	6.36713e-258	3.56707	4.90623e-257	AT2G27830
chr3	6563200	6564399	730	79	6.33132e-178	3.56592	3.31396e-177	AT3G19030
chr4	13816600	13819999	2750	298	0	3.56117	0	AT4G27660
chr4	13816600	13819999	2750	298	0	3.56117	0	AT4G27670
chr2	9739800	9741599	1614	175	0	3.55911	0	AT2G22870
chr2	9739800	9741599	1614	175	0	3.55911	0	AT2G22880
chr2	19250800	19254799	3513	381	0	3.55819	0	AT2G46860
chr2	19250800	19254799	3513	381	0	3.55819	0	AT2G46850
chr5	23056200	23057799	1715	186	0	3.55817	0	AT5G56980
chr1	11827200	11828599	1253	136	3.1404e-302	3.5554	2.95557e-301	AT1G32700
chr4	16354600	16359399	4154	451	0	3.5544	0	AT4G34150
chr4	16354600	16359399	4154	451	0	3.5544	0	AT4G34160
chr4	9157200	9157799	442	48	2.61492e-108	3.55351	8.82612e-108	AT4G16155
chr4	9157200	9157799	442	48	2.61492e-108	3.55351	8.82612e-108	AT4G16160
chr2	19075000	19076799	1206	131	1.04243e-290	3.55265	9.4633e-290	AT2G46470
chr2	19075000	19076799	1206	131	1.04243e-290	3.55265	9.4633e-290	AT2G46480
chr5	5794400	5798199	3231	351	0	3.55227	0	AT5G17570
chr5	5794400	5798199	3231	351	0	3.55227	0	AT5G17580
chr5	5794400	5798199	3231	351	0	3.55227	0	AT5G17590
chr4	16573400	16574799	1224	133	7.08912e-295	3.55145	6.52394e-294	AT4G34730
chr4	16573400	16574799	1224	133	7.08912e-295	3.55145	6.52394e-294	AT4G34740
chr1	23089400	23091599	2052	223	0	3.55098	0	AT1G62400
chr5	3737200	3738399	873	95	1.00682e-210	3.54623	6.22743e-210	AT5G11610
chr3	22675200	22676799	1516	165	0	3.54561	0	AT3G61260
chr5	24660400	24663199	2654	289	0	3.54388	0	AT5G61340
chr5	24660400	24663199	2654	289	0	3.54388	0	AT5G61330
chr4	6631800	6632599	652	71	6.19383e-158	3.54377	2.90367e-157	AT4G10770
chr5	23732400	23736999	3918	427	0	3.54089	0	AT5G58760
chr5	23732400	23736999	3918	427	0	3.54089	0	AT5G58770
chr5	23732400	23736999	3918	427	0	3.54089	0	AT5G58780
chr2	18364600	18367799	2696	294	0	3.53874	0	AT2G44490
chr1	21238000	21240799	2209	241	0	3.53716	0	AT1G56660
chr2	15718000	15719199	988	108	1.00771e-236	3.53028	7.10535e-236	AT2G37440
chr1	10680000	10682999	2606	285	0	3.52863	0	AT1G30320
chr5	15305800	15306999	978	107	4.3292e-234	3.52721	3.0063e-233	AT5G38300
chr5	26854000	26856599	2376	260	0	3.52654	0	AT5G67300
chr5	26854000	26856599	2376	260	0	3.52654	0	AT5G67310
chr3	5028200	5030399	2147	235	0	3.52566	0	AT3G14940
chr3	5028200	5030399	2147	235	0	3.52566	0	AT3G14950
chr5	23279000	23281599	2647	290	0	3.52235	0	AT5G57480
chr1	6557000	6562799	5591	613	0	3.5197	0	AT1G18980
chr1	6557000	6562799	5591	613	0	3.5197	0	AT1G18990
chr1	6557000	6562799	5591	613	0	3.5197	0	AT1G19000
chr5	8127200	8129799	2233	245	0	3.51721	0	AT5G24050
chr5	8127200	8129799	2233	245	0	3.51721	0	AT5G24040
chr2	16765800	16768799	2716	298	0	3.51714	0	AT2G40130
chr1	24974000	24974999	865	95	2.4699e-206	3.51373	1.4886e-205	AT1G66940
chr5	18742600	18747399	4068	447	0	3.51196	0	AT5G46230
chr5	18742600	18747399	4068	447	0	3.51196	0	AT5G46240
chr4	17125800	17127999	1929	212	0	3.51134	0	AT4G36190
chr4	17125800	17127999	1929	212	0	3.51134	0	AT4G36195
chr4	9650200	9654399	3552	391	0	3.50568	0	AT4G17200
chr4	9650200	9654399	3552	391	0	3.50568	0	AT4G17210
chr4	9650200	9654399	3552	391	0	3.50568	0	AT4G17190
chr1	28764200	28767599	2707	298	0	3.50548	0	AT1G76630
chr1	28764200	28767599	2707	298	0	3.50548	0	AT1G76640
chr1	28764200	28767599	2707	298	0	3.50548	0	AT1G76650
chr3	20296200	20298999	2498	275	0	3.50539	0	AT3G54810
chr4	11707200	11710199	2822	311	0	3.50165	0	AT4G22100
chr4	8029600	8030199	526	58	6.99152e-126	3.49972	2.67359e-125	AT4G13885
chr2	8097600	8099799	1859	205	0	3.49946	0	AT2G18690
chr1	6683000	6683799	671	74	8.28759e-160	3.49918	3.92109e-159	AT1G19330
chr3	17949400	17950199	734	81	2.07781e-174	3.49693	1.06393e-173	AT3G48460
chr2	17261600	17262999	1521	168	0	3.49378	0	AT2G41410
chr5	21236800	21239599	2272	251	0	3.4931	0	AT5G52300
chr1	3469600	3472999	3243	359	0	3.48601	0	AT1G10522
chr1	3469600	3472999	3243	359	0	3.48601	0	AT1G10530
chr5	24102800	24104199	1192	132	3.28019e-280	3.4848	2.79169e-279	AT5G59820
chr1	22031400	22040399	7521	833	0	3.48423	0	AT1G59860
chr1	22031400	22040399	7521	833	0	3.48423	0	AT1G59865
chr1	22031400	22040399	7521	833	0	3.48423	0	AT1G59870
chr5	18228800	18232399	2870	318	0	3.48282	0	AT5G45110
chr5	18228800	18232399	2870	318	0	3.48282	0	AT5G45113
chr5	23398400	23403199	4078	452	0	3.48165	0	AT5G57747
chr5	23398400	23403199	4078	452	0	3.48165	0	AT5G57750
chr5	23398400	23403199	4078	452	0	3.48165	0	AT5G57760
chr5	23398400	23403199	4078	452	0	3.48165	0	AT5G57770
chr2	15686800	15687999	1073	119	5.06959e-252	3.4796	3.79892e-251	AT2G37380
chr5	26421800	26425799	3543	393	0	3.479	0	AT5G66070
chr5	26421800	26425799	3543	393	0	3.479	0	AT5G66080
chr5	26421800	26425799	3543	393	0	3.479	0	AT5G66090
chr5	23851800	23854199	1857	206	0	3.47873	0	AT5G59090
chr1	30147400	30148199	631	70	2.74672e-149	3.47862	1.21388e-148	AT1G80140
chr2	10832400	10835799	2747	305	0	3.47564	0	AT2G25460
chr4	18163200	18165999	1962	218	0	3.47311	0	AT4G38960
chr4	18163200	18165999	1962	218	0	3.47311	0	AT4G38970
chr5	11400	16199	3543	394	0	3.47017	0	AT5G01030
chr5	11400	16199	3543	394	0	3.47017	0	AT5G01040
chr4	13809800	13813999	3452	384	0	3.46909	0	AT4G27652
chr4	13809800	13813999	3452	384	0	3.46909	0	AT4G27657
chr4	13809800	13813999	3452	384	0	3.46909	0	AT4G27654
chr5	24188600	24189999	1141	127	1.55256e-266	3.46703	1.24936e-265	AT5G60060
chr4	8665200	8666199	862	96	6.78584e-202	3.46507	3.99585e-201	AT4G15200
chr1	4542200	4543999	1651	184	0	3.46262	0	AT1G13260
chr2	6743800	6744799	780	87	1.38782e-182	3.4598	7.41562e-182	AT2G15440
chr5	1989200	1992399	3003	335	0	3.45929	0	AT5G06520
chr5	1989200	1992399	3003	335	0	3.45929	0	AT5G06530
chr3	20717000	20718999	1675	187	0	3.4566	0	AT3G55830
chr3	20717000	20718999	1675	187	0	3.4566	0	AT3G55840
chr1	9355800	9357599	1451	162	0	3.45644	0	AT1G26960
chr5	21116400	21117999	1388	155	0	3.45568	0	AT5G51990
chr3	3352600	3358599	4531	506	0	3.45557	0	AT3G10710
chr3	3352600	3358599	4531	506	0	3.45557	0	AT3G10720
chr3	3352600	3358599	4531	506	0	3.45557	0	AT3G10730
chr5	22357000	22358599	1728	193	0	3.45511	0	AT5G55090
chr4	6966600	6968599	1593	178	0	3.4536	0	AT4G11460
chr4	6966600	6968599	1593	178	0	3.4536	0	AT4G11470
chr1	117000	118999	1942	217	0	3.45355	0	AT1G01300
chr3	5031800	5033199	1199	134	1.97595e-278	3.45295	1.67513e-277	AT3G14950
chr1	5045600	5046799	957	107	1.12649e-222	3.45147	7.37596e-222	AT1G14686
chr5	1354200	1356199	2030	227	0	3.45101	0	AT5G04700
chr5	26146600	26150399	3307	370	0	3.44912	0	AT5G65430
chr3	20780200	20781399	1081	121	8.66491e-251	3.4476	6.45425e-250	AT3G55990
chr4	17048800	17050399	1553	174	0	3.44428	0	AT4G36040
chr5	19179800	19181599	2008	225	0	3.44395	0	AT5G47229
chr5	19179800	19181599	2008	225	0	3.44395	0	AT5G47230
chr1	23795000	23796199	821	92	7.42153e-191	3.44375	4.14607e-190	AT1G64100
chr1	23795000	23796199	821	92	7.42153e-191	3.44375	4.14607e-190	AT1G64105
chr1	29713400	29716399	2757	309	0	3.44314	0	AT1G78990
chr1	29713400	29716399	2757	309	0	3.44314	0	AT1G78995
chr1	29713400	29716399	2757	309	0	3.44314	0	AT1G79000
chr3	9812800	9814599	1516	170	0	3.44133	0	AT3G26710
chr1	10900800	10902199	1210	136	7.75886e-279	3.43338	6.5905e-278	AT1G30730
chr2	16050000	16051599	1459	164	0	3.43311	0	AT2G38310
chr5	1283200	1285599	1885	212	0	3.43124	0	AT5G04500
chr5	25097800	25100599	2142	241	0	3.42988	0	AT5G62520
chr5	25097800	25100599	2142	241	0	3.42988	0	AT5G62530
chr5	21910600	21911599	888	100	7.45383e-205	3.4268	4.43717e-204	AT5G53970
chr1	7192400	7195399	2575	290	0	3.42654	0	AT1G20730
chr1	7192400	7195399	2575	290	0	3.42654	0	AT1G20720
chr4	314400	315399	799	90	1.54578e-184	3.42594	8.35181e-184	AT4G00750
chr1	29708400	29711399	2484	280	0	3.42349	0	AT1G78980
chr5	6290400	6292799	1925	217	0	3.42332	0	AT5G18860
chr3	4914200	4919999	4984	562	0	3.4223	0	AT3G14610
chr3	4914200	4919999	4984	562	0	3.4223	0	AT3G14630
chr3	4914200	4919999	4984	562	0	3.4223	0	AT3G14640
chr3	4914200	4919999	4984	562	0	3.4223	0	AT3G14620
chr5	6470000	6472999	2864	323	0	3.42174	0	AT5G19240
chr5	6470000	6472999	2864	323	0	3.42174	0	AT5G19250
chr3	3533200	3535199	1720	194	0	3.42139	0	AT3G11280
chr3	3533200	3535199	1720	194	0	3.42139	0	AT3G11285
chr1	1685200	1687399	1923	217	0	3.41976	0	AT1G05630
chr4	13732600	13734199	1700	192	0	3.41683	0	AT4G27460
chr5	2137400	2139799	2300	260	0	3.41374	0	AT5G06900
chr5	2137400	2139799	2300	260	0	3.41374	0	AT5G06905
chr1	23683200	23684399	1309	148	4.92486e-299	3.41314	4.58549e-298	AT1G63820
chr5	22547200	22549599	2096	237	0	3.41286	0	AT5G55680
chr5	22547200	22549599	2096	237	0	3.41286	0	AT5G55690
chr5	16568800	16570199	1185	134	6.37584e-271	3.41263	5.23215e-270	AT5G41400
chr5	21817200	21819399	2131	241	0	3.41226	0	AT5G53750
chr5	6160200	6163599	3137	355	0	3.41006	0	AT5G18550
chr1	23443000	23443799	706	80	4.43577e-162	3.40558	2.11939e-161	AT1G63210
chr4	13928200	13930799	2479	281	0	3.40444	0	AT4G28005
chr4	13928200	13930799	2479	281	0	3.40444	0	AT4G28010
chr4	13928200	13930799	2479	281	0	3.40444	0	AT4G28000
chr4	13021800	13022799	916	104	6.38243e-209	3.3989	3.91711e-208	AT4G25490
chr1	3474400	3476199	1488	169	0	3.39776	0	AT1G10540
chr1	20802200	20803599	1109	126	4.07114e-252	3.39654	3.05335e-251	AT1G55660
chr1	20802200	20803599	1109	126	4.07114e-252	3.39654	3.05335e-251	AT1G55670
chr5	16646200	16647199	783	89	1.02662e-178	3.39506	5.41256e-178	AT5G41620
chr2	16556800	16557799	950	108	3.39606e-216	3.3945	2.15876e-215	AT2G39705
chr1	28359000	28361799	2243	255	0	3.39442	0	AT1G75530
chr5	19975600	19977599	1636	186	0	3.39427	0	AT5G49280
chr3	10434800	10438199	3131	356	0	3.39398	0	AT3G28040
chr1	28182800	28183999	1098	125	5.70792e-249	3.38976	4.2228e-248	AT1G75060
chr1	787000	788999	1748	199	0	3.38972	0	AT1G03220
chr1	28812800	28815399	2265	258	0	3.38785	0	AT1G76760
chr1	28812800	28815399	2265	258	0	3.38785	0	AT1G76770
chr4	14324200	14325599	1167	133	4.75948e-264	3.38606	3.78457e-263	AT4G29080
chr4	13124800	13126999	1702	194	0	3.38559	0	AT4G25800
chr1	6266400	6268999	2158	246	0	3.38526	0	AT1G18200
chr1	6266400	6268999	2158	246	0	3.38526	0	AT1G18210
chr3	22279600	22280599	693	79	7.25214e-158	3.38518	3.39615e-157	AT3G60280
chr1	5644400	5645199	640	73	6.91886e-146	3.38324	3.00288e-145	AT1G16510
chr3	17905200	17906799	1464	167	0	3.38299	0	AT3G48350
chr3	8295400	8296399	875	100	6.26115e-198	3.37663	3.62564e-197	AT3G23240
chr1	11213800	11216199	1776	203	0	3.37616	0	AT1G31320
chr1	11213800	11216199	1776	203	0	3.37616	0	AT1G31330
chr5	23632400	23633399	866	99	7.5986e-196	3.37566	4.35097e-195	AT5G58460
chr3	8382600	8385799	2606	298	0	3.37469	0	AT3G23410
chr3	21380600	21381999	1145	131	9.18427e-258	3.37295	7.05828e-257	AT3G57680
chr3	9578600	9580199	1206	138	2.73516e-271	3.37244	2.25089e-270	AT3G26180
chr5	8584600	8585199	463	53	9.13016e-106	3.37117	3.03121e-105	AT5G24920
chr5	5893600	5894799	829	95	5.56637e-187	3.36749	3.03953e-186	AT5G17830
chr5	21118800	21122999	3331	382	0	3.36502	0	AT5G52000
chr5	21118800	21122999	3331	382	0	3.36502	0	AT5G52010
chr1	21707200	21707999	706	81	2.17822e-159	3.36353	1.02779e-158	AT1G58420
chr1	5090800	5091799	697	80	2.64442e-157	3.36216	1.23505e-156	AT1G14780
chr3	5180400	5181599	810	93	2.76169e-182	3.36107	1.47386e-181	AT3G15352
chr3	5180400	5181599	810	93	2.76169e-182	3.36107	1.47386e-181	AT3G15353
chr4	16851800	16852999	1036	119	3.09282e-232	3.35961	2.12235e-231	AT4G35480
chr2	14557000	14558399	1288	148	6.73807e-288	3.35838	6.04761e-287	AT2G34555
chr1	10633400	10635599	1809	208	0	3.35623	0	AT1G30220
chr1	27303200	27304799	1539	177	0	3.35538	0	AT1G72510
chr5	16202000	16203199	852	98	4.02245e-191	3.35498	2.25293e-190	AT5G40460
chr5	18031400	18034599	2738	315	0	3.35428	0	AT5G44690
chr5	18031400	18034599	2738	315	0	3.35428	0	AT5G44700
chr1	523400	524599	973	112	1.18001e-217	3.35252	7.54497e-217	AT1G02520
chr2	2359000	2360399	860	99	1.11592e-192	3.35227	6.29056e-192	AT2G06050
chr3	21818600	21821399	2221	256	0	3.34799	0	AT3G59030
chr3	21818600	21821399	2221	256	0	3.34799	0	AT3G59040
chr3	3186200	3188199	2090	241	0	3.34661	0	AT3G10300
chr5	1929600	1931799	2176	251	0	3.3455	0	AT5G06310
chr5	1929600	1931799	2176	251	0	3.3455	0	AT5G06320
chr4	1032400	1034999	2011	232	0	3.34503	0	AT4G02330
chr2	16366000	16368399	2461	284	0	3.34402	0	AT2G39210
chr1	30052400	30056799	3830	442	0	3.34389	0	AT1G79900
chr1	30052400	30056799	3830	442	0	3.34389	0	AT1G79910
chr5	20263800	20265199	1152	133	3.90595e-256	3.34254	2.97816e-255	AT5G49860
chr2	149000	150199	1142	132	1.57929e-253	3.33863	1.19165e-252	AT2G01290
chr2	149000	150199	1142	132	1.57929e-253	3.33863	1.19165e-252	AT2G01280
chr2	19286000	19287599	1245	144	6.84484e-276	3.33644	5.72484e-275	AT2G46940
chr2	19286000	19287599	1245	144	6.84484e-276	3.33644	5.72484e-275	AT2G46930
chr2	12767600	12768599	631	73	3.87451e-141	3.33567	1.63557e-140	AT2G29950
chr4	10256800	10258599	1573	182	0	3.33529	0	AT4G18630
chr4	13965600	13966999	1227	142	9.97717e-272	3.33451	8.22621e-271	AT4G28100
chr5	917400	922599	4234	490	0	3.3345	0	AT5G03620
chr5	917400	922599	4234	490	0	3.3345	0	AT5G03630
chr5	917400	922599	4234	490	0	3.3345	0	AT5G03610
chr3	23011200	23014199	2469	286	0	3.33143	0	AT3G62150
chr5	2889200	2890199	915	106	4.64844e-203	3.33113	2.74838e-202	AT5G09320
chr4	8136200	8138199	1709	198	0	3.33083	0	AT4G14120
chr4	8136200	8138199	1709	198	0	3.33083	0	AT4G14130
chr5	25269000	25272799	2908	337	0	3.32997	0	AT5G62960
chr5	25269000	25272799	2908	337	0	3.32997	0	AT5G62970
chr2	14458800	14459599	604	70	6.89542e-135	3.32978	2.79765e-134	AT2G34238
chr2	14458800	14459599	604	70	6.89542e-135	3.32978	2.79765e-134	AT2G34240
chr5	3651200	3654999	2933	340	0	3.32896	0	AT5G11430
chr5	3651200	3654999	2933	340	0	3.32896	0	AT5G11450
chr5	3651200	3654999	2933	340	0	3.32896	0	AT5G11440
chr3	5457800	5459599	1509	175	0	3.32757	0	AT3G16090
chr3	5457800	5459599	1509	175	0	3.32757	0	AT3G16100
chr1	19883600	19885199	1284	149	3.68848e-283	3.32548	3.24043e-282	AT1G53310
chr4	13217600	13218399	741	86	1.49679e-164	3.32503	7.24697e-164	AT4G26070
chr3	17438200	17441599	2645	307	0	3.32478	0	AT3G47340
chr3	17438200	17441599	2645	307	0	3.32478	0	AT3G47341
chr3	5426800	5427599	672	78	1.85114e-149	3.32469	8.18918e-149	AT3G15990
chr1	11928800	11930199	1093	127	5.01189e-241	3.32118	3.60385e-240	AT1G32920
chr2	989400	990599	998	116	3.219e-220	3.32008	2.08422e-219	AT2G03260
chr2	8491200	8495799	4112	478	0	3.31972	0	AT2G19640
chr2	8491200	8495799	4112	478	0	3.31972	0	AT2G19650
chr3	19813600	19815799	1565	182	0	3.31833	0	AT3G53450
chr4	6230600	6232199	1229	143	3.76216e-270	3.31659	3.07573e-269	AT4G09940
chr5	25088400	25090399	1736	202	0	3.31646	0	AT5G62480
chr5	25088400	25090399	1736	202	0	3.31646	0	AT5G62490
chr3	19692000	19693599	1289	150	3.74437e-283	3.31618	3.28622e-282	AT3G53120
chr3	19692000	19693599	1289	150	3.74437e-283	3.31618	3.28622e-282	AT3G53130
chr2	7941600	7943199	1478	172	0	3.31606	0	AT2G18250
chr2	7941600	7943199	1478	172	0	3.31606	0	AT2G18260
chr1	27394800	27396799	1984	231	0	3.31441	0	AT1G72790
chr5	84400	87199	2774	323	0	3.31421	0	AT5G01210
chr5	84400	87199	2774	323	0	3.31421	0	AT5G01215
chr5	84400	87199	2774	323	0	3.31421	0	AT5G01220
chr2	7925200	7925999	515	60	1.40809e-114	3.31232	4.96219e-114	AT2G18210
chr2	11683800	11685199	1287	150	4.12364e-282	3.31103	3.56877e-281	AT2G27310
chr2	17796000	17797399	1098	128	5.06159e-241	3.31031	3.63659e-240	AT2G42760
chr5	7389800	7390799	832	97	2.80811e-183	3.31	1.50601e-182	AT5G22330
chr5	7389800	7390799	832	97	2.80811e-183	3.31	1.50601e-182	AT5G22320
chr3	20509200	20510199	892	104	2.76371e-196	3.30984	1.58668e-195	AT3G55320
chr5	589600	592999	3121	364	0	3.30878	0	AT5G02630
chr5	589600	592999	3121	364	0	3.30878	0	AT5G02620
chr4	7962200	7964599	1791	209	0	3.30693	0	AT4G13710
chr3	20547800	20552199	3676	429	0	3.3067	0	AT3G55420
chr3	20547800	20552199	3676	429	0	3.3067	0	AT3G55430
chr1	3480200	3481199	531	62	1.06003e-117	3.30506	3.82215e-117	AT1G10550
chr5	23174600	23175599	882	103	1.10408e-193	3.30451	6.2603e-193	AT5G57190
chr4	2714600	2715199	479	56	3.02498e-106	3.30083	1.00852e-105	AT4G05310
chr5	2858000	2860399	2171	254	0	3.29839	0	AT5G08780
chr5	2858000	2860399	2171	254	0	3.29839	0	AT5G08790
chr2	10617000	10617599	547	64	7.96294e-121	3.29825	2.93309e-120	AT2G24960
chr1	10411800	10412999	922	108	1.7246e-201	3.29445	1.01348e-200	AT1G29740
chr1	3813600	3817599	3329	390	0	3.29401	0	AT1G11330
chr1	3813600	3817599	3329	390	0	3.29401	0	AT1G11340
chr1	3813600	3817599	3329	390	0	3.29401	0	AT1G11350
chr1	1435400	1437399	1690	198	0	3.2938	0	AT1G05020
chr1	28585400	28587799	2096	246	0	3.288	0	AT1G76170
chr1	28585400	28587799	2096	246	0	3.288	0	AT1G76180
chr1	20748600	20750999	1900	223	0	3.28795	0	AT1G55550
chr1	7852800	7854199	1141	134	8.56705e-248	3.28592	6.3059e-247	AT1G22240
chr2	18711800	18713199	1013	119	3.17743e-220	3.28502	2.05883e-219	AT2G45410
chr4	8400800	8402999	1583	186	0	3.28431	0	AT4G14650
chr1	6059800	6063799	3455	406	0	3.28396	0	AT1G17615
chr1	6059800	6063799	3455	406	0	3.28396	0	AT1G17620
chr2	7474600	7476199	1276	150	2.09704e-276	3.28273	1.76236e-275	AT2G17170
chr2	16687800	16690199	2312	272	0	3.28016	0	AT2G39975
chr2	16687800	16690199	2312	272	0	3.28016	0	AT2G39980
chr3	3988600	3988999	238	28	1.31387e-53	3.28016	2.7436e-53	AT3G12570
chr4	16255200	16255599	238	28	1.31387e-53	3.28016	2.7436e-53	AT4G33905
chr4	8211200	8213399	1538	181	0	3.27909	0	AT4G14250
chr1	18178400	18182199	2999	353	0	3.27852	0	AT1G49150
chr1	18178400	18182199	2999	353	0	3.27852	0	AT1G49160
chr1	22315200	22316999	1375	162	1.06161e-296	3.2754	9.82156e-296	AT1G60590
chr5	13900400	13902999	1952	230	0	3.27513	0	AT5G35735
chr1	9877600	9879399	1239	146	1.4212e-267	3.27487	1.14789e-266	AT1G28260
chr2	15944600	15946799	1909	225	0	3.27416	0	AT2G38090
chr5	18029600	18030399	441	52	7.03138e-97	3.27274	2.17608e-96	AT5G44690
chr5	21880400	21883399	2866	338	0	3.27217	0	AT5G53890
chr5	21880400	21883399	2866	338	0	3.27217	0	AT5G53895
chr5	21880400	21883399	2866	338	0	3.27217	0	AT5G53900
chr1	20812000	20812999	746	88	5.82054e-162	3.27139	2.77951e-161	AT1G55690
chr4	16617000	16617599	373	44	2.72427e-82	3.27139	7.46369e-82	AT4G34880
chr3	2315200	2316799	1432	169	3.73658e-308	3.26988	3.5785e-307	AT3G07270
chr3	864400	865399	771	91	3.61848e-167	3.26956	1.78164e-166	AT3G03590
chr1	26694600	26696599	1991	235	0	3.26949	0	AT1G70780
chr1	26694600	26696599	1991	235	0	3.26949	0	AT1G70782
chr5	3532000	3532799	737	87	6.98725e-160	3.26907	3.30945e-159	AT5G11100
chr5	16441600	16444399	1999	236	0	3.26871	0	AT5G41080
chr4	418400	420599	1592	188	0	3.26784	0	AT4G00970
chr5	4414800	4415999	1143	135	2.93248e-246	3.2673	2.14581e-245	AT5G13680
chr5	4414800	4415999	1143	135	2.93248e-246	3.2673	2.14581e-245	AT5G13690
chr4	12138000	12144999	5976	706	0	3.26649	0	AT4G23190
chr4	12138000	12144999	5976	706	0	3.26649	0	AT4G23205
chr4	12138000	12144999	5976	706	0	3.26649	0	AT4G23180
chr5	25017200	25018199	694	82	1.62135e-150	3.26604	7.22394e-150	AT5G62280
chr2	18119800	18120999	1049	124	5.64966e-226	3.2646	3.76428e-225	AT2G43710
chr1	11585600	11586799	744	88	6.24481e-161	3.26262	2.97234e-160	AT1G32180
chr1	6135000	6137799	1995	236	0	3.26217	0	AT1G17820
chr1	6135000	6137799	1995	236	0	3.26217	0	AT1G17830
chr3	10848200	10849799	1580	187	0	3.26055	0	AT3G28850
chr5	18979000	18980199	1039	123	2.2092e-223	3.25977	1.45198e-222	AT5G46780
chr5	22872800	22874399	1461	173	0	3.25897	0	AT5G56500
chr5	22872800	22874399	1461	173	0	3.25897	0	AT5G56490
chr5	24778000	24779199	895	106	1.10165e-192	3.25832	6.21416e-192	AT5G61650
chr1	9359400	9360799	1089	129	8.58898e-234	3.25772	5.95016e-233	AT1G26970
chr4	18376800	18377399	422	50	3.35123e-92	3.25701	1.00192e-91	AT4G39530
chr5	19301000	19302199	945	112	4.26651e-203	3.25604	2.52428e-202	AT5G47610
chr5	19301000	19302199	945	112	4.26651e-203	3.25604	2.52428e-202	AT5G47620
chr2	14371000	14373999	2708	321	0	3.25551	0	AT2G34020
chr1	3295200	3295999	489	58	2.85463e-106	3.25355	9.52091e-106	AT1G10090
chr2	10478400	10479599	902	107	9.80448e-194	3.25311	5.56289e-193	AT2G24640
chr1	18836800	18837999	952	113	3.79384e-204	3.25113	2.25381e-203	AT1G50830
chr5	9656800	9657599	556	66	2.45243e-120	3.25092	9.01053e-120	AT5G27360
chr1	20219000	20219399	219	26	6.42402e-49	3.25047	1.27675e-48	AT1G54160
chr1	1732000	1732999	640	76	4.81825e-138	3.24969	1.99388e-137	AT1G05785
chr1	1732000	1732999	640	76	4.81825e-138	3.24969	1.99388e-137	AT1G05790
chr5	24785400	24786399	724	86	9.54593e-156	3.24875	4.38549e-155	AT5G61670
chr4	15487800	15493399	4958	589	0	3.24838	0	AT4G32020
chr4	15487800	15493399	4958	589	0	3.24838	0	AT4G32030
chr3	6840200	6842999	2575	306	0	3.24737	0	AT3G19680
chr3	6840200	6842999	2575	306	0	3.24737	0	AT3G19690
chr1	18365600	18366799	976	116	7.68456e-209	3.24689	4.71295e-208	AT1G49620
chr3	7107800	7109199	1144	136	3.14787e-244	3.24611	2.28234e-243	AT3G20380
chr5	23355400	23356999	1379	164	1.16218e-293	3.24486	1.06614e-292	AT5G57660
chr4	6266200	6267199	672	80	2.63823e-144	3.24157	1.13486e-143	AT4G10010
chr5	23940800	23941999	1134	135	1.21945e-241	3.24157	8.78306e-241	AT5G59350
chr3	17498200	17499399	1117	133	5.33379e-238	3.24099	3.78226e-237	AT3G47490
chr2	8326200	8329399	2628	313	0	3.24009	0	AT2G19190
chr3	4798000	4799599	1402	167	7.64776e-298	3.23972	7.11315e-297	AT3G14370
chr4	8977800	8978599	705	84	4.43758e-151	3.23881	1.98326e-150	AT4G15770
chr1	29355200	29355999	411	49	4.28823e-89	3.23684	1.24698e-88	AT1G78070
chr4	17210200	17211999	1300	155	5.3079e-276	3.23659	4.44365e-275	AT4G36450
chr5	26772600	26775999	3019	360	0	3.23621	0	AT5G67080
chr5	26772600	26775999	3019	360	0	3.23621	0	AT5G67090
chr3	10611200	10611599	218	26	2.1018e-48	3.23563	4.14792e-48	AT3G28360
chr1	9766800	9767999	830	99	4.05189e-177	3.23533	2.11071e-176	AT1G28010
chr5	21826400	21827199	553	66	8.44602e-119	3.23338	3.06568e-118	AT5G53770
chr5	21826400	21827199	553	66	8.44602e-119	3.23338	3.06568e-118	AT5G53760
chr3	18036400	18038199	1441	172	3.72143e-305	3.23304	3.53678e-304	AT3G48680
chr3	18036400	18038199	1441	172	3.72143e-305	3.23304	3.53678e-304	AT3G48690
chr5	26021400	26022599	1022	122	3.30059e-217	3.23271	2.1073e-216	AT5G65140
chr3	5325600	5327799	1985	237	0	3.23213	0	AT3G15720
chr1	1251000	1252199	837	100	3.56946e-178	3.22999	1.87284e-177	AT1G04580
chr1	24790600	24792399	1238	148	5.51114e-262	3.22801	4.3348e-261	AT1G66460
chr1	27034000	27035199	1087	130	3.05754e-230	3.22673	2.0785e-229	AT1G71870
chr3	20114600	20115799	1045	125	2.14873e-221	3.22613	1.39957e-220	AT3G54320
chr5	2691400	2693799	1722	206	0	3.22583	0	AT5G08370
chr2	14817400	14818199	618	74	7.64287e-132	3.2228	3.0526e-131	AT2G35150
chr2	19368800	19370399	1344	161	2.35923e-283	3.22144	2.07474e-282	AT2G47170
chr2	19368800	19370399	1344	161	2.35923e-283	3.22144	2.07474e-282	AT2G47180
chr5	1563600	1566199	2095	251	0	3.22097	0	AT5G05270
chr5	1563600	1566199	2095	251	0	3.22097	0	AT5G05280
chr5	1563600	1566199	2095	251	0	3.22097	0	AT5G05282
chr4	18426800	18428799	1559	187	0	3.21722	0	AT4G39710
chr1	7103200	7109999	5476	657	0	3.21643	0	AT1G20510
chr1	7103200	7109999	5476	657	0	3.21643	0	AT1G20515
chr1	7103200	7109999	5476	657	0	3.21643	0	AT1G20520
chr1	7103200	7109999	5476	657	0	3.21643	0	AT1G20530
chr1	29178800	29180199	1216	146	8.40704e-256	3.21408	6.39889e-255	AT1G77640
chr5	20167000	20169799	2257	271	0	3.21394	0	AT5G49665
chr3	5616800	5618399	1374	165	1.33749e-288	3.2135	1.20168e-287	AT3G16510
chr4	550200	551599	1307	157	1.50028e-274	3.21257	1.24999e-273	AT4G01328
chr4	550200	551599	1307	157	1.50028e-274	3.21257	1.24999e-273	AT4G01330
chr1	30139000	30140199	1048	126	2.03278e-220	3.20972	1.31813e-219	AT1G80120
chr4	17373200	17376199	2287	275	0	3.20929	0	AT4G36870
chr4	17373200	17376199	2287	275	0	3.20929	0	AT4G36880
chr1	21538400	21539799	1214	146	8.69831e-255	3.20879	6.60329e-254	AT1G58180
chr1	7696400	7698999	2270	273	0	3.20877	0	AT1G21910
chr3	22496400	22497999	1480	178	5.6855062143e-310	3.20862	0	AT3G60890
chr3	22496400	22497999	1480	178	5.6855062143e-310	3.20862	0	AT3G60880
chr1	10936800	10938199	1272	153	9.16426e-267	3.20828	7.38821e-266	AT1G30800
chr1	10936800	10938199	1272	153	9.16426e-267	3.20828	7.38821e-266	AT1G30810
chr1	6543200	6545399	2095	252	0	3.20819	0	AT1G18940
chr1	20362000	20362599	532	64	4.06033e-113	3.2078	1.41204e-112	AT1G54510
chr5	23677000	23677799	482	58	1.07729e-102	3.20697	3.48889e-102	AT5G58580
chr3	21893800	21895599	1561	188	0	3.20421	0	AT3G59220
chr1	28503600	28504599	714	86	1.19836e-150	3.20388	5.34479e-150	AT1G75920
chr4	13066200	13069399	2706	326	0	3.20322	0	AT4G25610
chr4	13066200	13069399	2706	326	0	3.20322	0	AT4G25620
chr2	18253200	18255999	2158	260	0	3.20298	0	AT2G44130
chr2	18253200	18255999	2158	260	0	3.20298	0	AT2G44140
chr4	8198600	8199199	307	37	3.45329e-66	3.20194	8.16923e-66	AT4G14225
chr5	4898400	4900199	1294	156	1.88797e-270	3.201	1.54495e-269	AT5G15120
chr5	5800200	5801199	647	78	1.37585e-136	3.201	5.65593e-136	AT5G17600
chr1	26946800	26948199	1044	126	2.15713e-218	3.19747	1.38333e-217	AT1G71680
chr1	26946800	26948199	1044	126	2.15713e-218	3.19747	1.38333e-217	AT1G71690
chr3	7450800	7451999	986	119	2.05933e-206	3.19747	1.24201e-205	AT3G21230
chr5	1623000	1625999	2311	279	0	3.19648	0	AT5G05480
chr5	1623000	1625999	2311	279	0	3.19648	0	AT5G05490
chr3	9841200	9841799	381	46	2.48231e-81	3.19627	6.74145e-81	AT3G26750
chr1	981600	983599	1681	203	0	3.19557	0	AT1G03860
chr1	981600	983599	1681	203	0	3.19557	0	AT1G03870
chr3	8889400	8890799	1109	134	1.96393e-231	3.19376	1.3403e-230	AT3G24460
chr1	7510400	7513399	2506	303	0	3.19164	0	AT1G21450
chr1	7510400	7513399	2506	303	0	3.19164	0	AT1G21460
chr1	19849400	19851999	2332	282	0	3.19121	0	AT1G53230
chr1	19849400	19851999	2332	282	0	3.19121	0	AT1G53233
chr1	14158400	14161799	3134	379	0	3.19107	0	AT1G37130
chr1	27717200	27723199	4693	568	0	3.18844	0	AT1G73690
chr1	27717200	27723199	4693	568	0	3.18844	0	AT1G73700
chr1	27717200	27723199	4693	568	0	3.18844	0	AT1G73710
chr5	5144200	5146399	1883	228	0	3.18707	0	AT5G15770
chr5	5144200	5146399	1883	228	0	3.18707	0	AT5G15780
chr1	2139800	2140799	867	105	6.17812e-181	3.18644	3.27508e-180	AT1G06970
chr4	5448200	5448799	355	43	1.30892e-75	3.18593	3.38796e-75	AT4G08555
chr2	19317200	19320799	2938	356	0	3.18477	0	AT2G47010
chr2	19317200	19320799	2938	356	0	3.18477	0	AT2G47015
chr2	19317200	19320799	2938	356	0	3.18477	0	AT2G47020
chr1	1211000	1215799	3986	483	0	3.18468	0	AT1G04470
chr4	994600	996999	2012	244	0	3.1821	0	AT4G02280
chr5	19235600	19236599	643	78	1.44406e-134	3.18121	5.85349e-134	AT5G47430
chr1	2137200	2138599	1236	150	5.28145e-256	3.17983	4.02342e-255	AT1G06960
chr1	2137200	2138599	1236	150	5.28145e-256	3.17983	4.02342e-255	AT1G06970
chr3	23044800	23046199	1244	151	1.4303e-257	3.17921	1.09824e-256	AT3G62270
chr4	10765000	10765799	519	63	5.08688e-109	3.17909	1.72499e-108	AT4G19810
chr3	2601800	2607999	5081	617	0	3.1779	0	AT3G08560
chr3	2601800	2607999	5081	617	0	3.1779	0	AT3G08570
chr3	2601800	2607999	5081	617	0	3.1779	0	AT3G08580
chr4	12195400	12196399	897	109	3.36326e-186	3.17572	1.83193e-185	AT4G23340
chr2	17226400	17230999	3974	483	0	3.1751	0	AT2G41312
chr2	17226400	17230999	3974	483	0	3.1751	0	AT2G41330
chr2	17226400	17230999	3974	483	0	3.1751	0	AT2G41340
chr2	17226400	17230999	3974	483	0	3.1751	0	AT2G41342
chr1	170800	172999	1530	186	0	3.17435	0	AT1G01460
chr1	170800	172999	1530	186	0	3.17435	0	AT1G01470
chr4	1193200	1193799	370	45	3.02576e-78	3.17296	8.00775e-78	AT4G02700
chr4	1193200	1193799	370	45	3.02576e-78	3.17296	8.00775e-78	AT4G02710
chr5	16734000	16735399	1036	126	2.3201e-214	3.17296	1.45885e-213	AT5G41800
chr1	27979000	27980399	1118	136	4.82638e-231	3.17233	3.28609e-230	AT1G74440
chr5	23170800	23171599	452	55	5.92369e-95	3.17141	1.81077e-94	AT5G57180
chr5	23170800	23171599	452	55	5.92369e-95	3.17141	1.81077e-94	AT5G57181
chr5	23170800	23171599	452	55	5.92369e-95	3.17141	1.81077e-94	AT5G57190
chr5	7044200	7045399	723	88	2.98308e-150	3.17053	1.32573e-149	AT5G20810
chr3	16271600	16273199	1256	153	1.06979e-258	3.16792	8.29467e-258	AT3G44720
chr3	450200	451399	878	107	1.4774e-181	3.16655	7.86533e-181	AT3G02270
chr2	7390800	7392599	1600	195	0	3.16637	0	AT2G17000
chr1	6746200	6747199	574	70	1.67819e-119	3.16439	6.11431e-119	AT1G19480
chr1	6746200	6747199	574	70	1.67819e-119	3.16439	6.11431e-119	AT1G19485
chr2	5071600	5072799	738	90	6.90755e-153	3.16439	3.11269e-152	AT2G12480
chr5	21870000	21871799	1238	151	1.46946e-254	3.16388	1.11457e-253	AT5G53870
chr4	274000	275199	1139	139	3.05057e-234	3.16217	2.12516e-233	AT4G00660
chr3	20289600	20290399	549	67	2.72049e-114	3.16209	9.55624e-114	AT3G54800
chr5	1215800	1217199	1154	141	7.05993e-237	3.15837	4.98601e-236	AT5G04340
chr1	18807800	18813199	4230	517	0	3.15737	0	AT1G50750
chr1	18807800	18813199	4230	517	0	3.15737	0	AT1G50740
chr1	259600	263399	2846	348	0	3.15596	0	AT1G01700
chr1	259600	263399	2846	348	0	3.15596	0	AT1G01710
chr4	6892000	6894399	2150	263	0	3.1547	0	AT4G11330
chr4	6892000	6894399	2150	263	0	3.1547	0	AT4G11340
chr3	18084400	18084999	425	52	9.75423e-89	3.154	2.82607e-88	AT3G48770
chr2	14726600	14731399	3876	475	0	3.14895	0	AT2G34910
chr2	14726600	14731399	3876	475	0	3.14895	0	AT2G34920
chr5	1528200	1532199	3525	432	0	3.14885	0	AT5G05160
chr5	1528200	1532199	3525	432	0	3.14885	0	AT5G05170
chr3	19116800	19120999	3499	429	0	3.14748	0	AT3G51540
chr3	19116800	19120999	3499	429	0	3.14748	0	AT3G51550
chr4	13936400	13939199	2414	296	0	3.14718	0	AT4G28025
chr4	13936400	13939199	2414	296	0	3.14718	0	AT4G28030
chr4	10883800	10885799	1582	194	0	3.14688	0	AT4G20140
chr4	16631000	16632199	897	110	9.22188e-184	3.14685	4.97024e-183	AT4G34910
chr4	16631000	16632199	897	110	9.22188e-184	3.14685	4.97024e-183	AT4G34900
chr5	1150800	1152999	2103	258	0	3.14554	0	AT5G04190
chr4	12072600	12074999	1825	224	0	3.14406	0	AT4G23030
chr1	28577800	28580999	2411	296	0	3.14327	0	AT1G76160
chr5	22465400	22468199	2093	257	0	3.14277	0	AT5G55440
chr5	22465400	22468199	2093	257	0	3.14277	0	AT5G55450
chr4	18462400	18464799	1930	237	0	3.14257	0	AT4G39790
chr1	1461200	1462399	969	119	7.01765e-198	3.14234	4.06101e-197	AT1G05085
chr4	8208800	8209799	692	85	4.83341e-142	3.14169	2.05579e-141	AT4G14250
chr4	12220600	12221799	928	114	1.54208e-189	3.14137	8.54369e-189	AT4G23400
chr3	11304800	11305199	293	36	1.36242e-61	3.14081	3.08884e-61	AT3G29410
chr1	24655000	24657799	2107	259	0	3.13936	0	AT1G66200
chr2	18468600	18469399	667	82	7.77892e-137	3.13898	3.20082e-136	AT2G44798
chr3	9208800	9210399	1065	131	1.05161e-216	3.13729	6.69449e-216	AT3G25290
chr3	956800	958399	1382	170	2.31697e-280	3.13715	1.97771e-279	AT3G03780
chr3	9555200	9555599	317	39	2.61218e-66	3.13668	6.19292e-66	AT3G26130
chr3	8960200	8964199	2982	367	0	3.13558	0	AT3G24560
chr3	8960200	8964199	2982	367	0	3.13558	0	AT3G24550
chr4	445000	448599	2778	342	0	3.1346	0	AT4G01023
chr4	445000	448599	2778	342	0	3.1346	0	AT4G01026
chr4	445000	448599	2778	342	0	3.1346	0	AT4G01030
chr4	445000	448599	2778	342	0	3.1346	0	AT4G01020
chr1	30260000	30261599	1218	150	5.26381e-247	3.13352	3.86471e-246	AT1G80480
chr1	30260000	30261599	1218	150	5.26381e-247	3.13352	3.86471e-246	AT1G80490
chr1	8981800	8982999	1193	147	8.38789e-242	3.13184	6.04636e-241	AT1G25560
chr5	26794000	26795399	1128	139	9.31841e-229	3.13163	6.30023e-228	AT5G67140
chr1	19524200	19526799	1995	246	0	3.12956	0	AT1G52410
chr1	19524200	19526799	1995	246	0	3.12956	0	AT1G52415
chr5	22594600	22597399	2238	276	0	3.12915	0	AT5G55830
chr5	22594600	22597399	2238	276	0	3.12915	0	AT5G55835
chr4	2259400	2261999	1905	235	0	3.12826	0	AT4G04540
chr1	99800	101999	1629	201	0	3.12753	0	AT1G01240
chr4	9367600	9368599	713	88	2.93536e-145	3.12668	1.26893e-144	AT4G16640
chr4	14828400	14829999	1393	172	5.12542e-281	3.12535	4.4008e-280	AT4G30290
chr4	13722400	13728999	5426	670	0	3.12522	0	AT4G27430
chr4	13722400	13728999	5426	670	0	3.12522	0	AT4G27435
chr4	13722400	13728999	5426	670	0	3.12522	0	AT4G27440
chr4	13722400	13728999	5426	670	0	3.12522	0	AT4G27450
chr4	1611200	1611799	340	42	1.57917e-70	3.12396	3.8866e-70	AT4G03635
chr4	10231400	10232999	1246	154	2.69498e-251	3.12229	2.01085e-250	AT4G18570
chr5	14844600	14845399	728	90	6.67243e-148	3.12151	2.92359e-147	AT5G37440
chr2	14736600	14740799	3340	413	0	3.12085	0	AT2G34930
chr2	14736600	14740799	3340	413	0	3.12085	0	AT2G34940
chr3	6714600	6715999	1423	176	2.66602e-286	3.1201	2.36843e-285	AT3G19380
chr1	11795800	11801199	4429	548	0	3.1189	0	AT1G32620
chr1	11795800	11801199	4429	548	0	3.1189	0	AT1G32630
chr1	11795800	11801199	4429	548	0	3.1189	0	AT1G32640
chr1	11795800	11801199	4429	548	0	3.1189	0	AT1G32610
chr1	7251600	7254799	2634	326	0	3.11799	0	AT1G20850
chr1	7251600	7254799	2634	326	0	3.11799	0	AT1G20860
chr3	5808200	5809599	1139	141	2.03882e-229	3.11731	1.38275e-228	AT3G17030
chr3	5808200	5809599	1139	141	2.03882e-229	3.11731	1.38275e-228	AT3G17040
chr5	17987200	17988399	945	117	9.02137e-191	3.11689	5.03659e-190	AT5G44590
chr3	22008800	22010599	1405	174	3.56475e-282	3.11604	3.09122e-281	AT3G59580
chr1	25021600	25022599	767	95	2.95924e-155	3.11564	1.35451e-154	AT1G67040
chr4	2718200	2720599	1994	247	0	3.11533	0	AT4G05330
chr4	2718200	2720599	1994	247	0	3.11533	0	AT4G05320
chr3	18815800	18817399	1299	161	8.57174e-261	3.11357	6.71787e-260	AT3G50660
chr2	18495200	18496599	1065	132	2.62185e-214	3.11352	1.6468e-213	AT2G44840
chr5	25037200	25038199	847	105	5.9687e-171	3.11294	2.99638e-170	AT5G62350
chr4	7111200	7111999	637	79	3.78275e-129	3.11163	1.48834e-128	AT4G11820
chr4	8084200	8084999	790	98	1.80567e-159	3.11084	8.52923e-159	AT4G13990
chr5	20070600	20071799	943	117	8.78229e-190	3.1103	4.88434e-189	AT5G49480
chr5	4518000	4519199	959	119	6.38396e-193	3.10991	3.60571e-192	AT5G14000
chr2	14539400	14541599	1958	243	0	3.10944	0	AT2G34500
chr5	6064000	6066399	1924	239	0	3.10658	0	AT5G18320
chr1	11010400	11010799	354	44	1.11052e-72	3.10475	2.79393e-72	AT1G30925
chr4	11126000	11126599	539	67	2.57183e-109	3.10449	8.73822e-109	AT4G20740
chr4	14711000	14711799	555	69	1.8578e-112	3.10399	6.44793e-112	AT4G30090
chr4	17569800	17571999	1801	224	0	3.10271	0	AT4G37370
chr2	9172200	9174399	1913	238	0	3.1018	0	AT2G21430
chr2	9172200	9174399	1913	238	0	3.1018	0	AT2G21440
chr3	834800	838999	3014	375	0	3.10162	0	AT3G03510
chr3	834800	838999	3014	375	0	3.10162	0	AT3G03520
chr5	23845200	23848799	2805	349	0	3.10158	0	AT5G59070
chr5	23845200	23848799	2805	349	0	3.10158	0	AT5G59080
chr5	1134800	1135599	442	55	5.69826e-90	3.10124	1.66869e-89	AT5G04140
chr5	3784000	3786399	1639	204	0	3.10045	0	AT5G11740
chr3	8581800	8584599	2137	266	0	3.10027	0	AT3G23800
chr1	4840000	4841999	1261	157	1.46594e-251	3.0995	1.09662e-250	AT1G14150
chr1	4840000	4841999	1261	157	1.46594e-251	3.0995	1.09662e-250	AT1G14160
chr5	23365800	23366999	1068	133	2.06362e-213	3.09881	1.29106e-212	AT5G57685
chr3	8969600	8973399	2987	372	0	3.09862	0	AT3G24580
chr3	8969600	8973399	2987	372	0	3.09862	0	AT3G24590
chr3	8969600	8973399	2987	372	0	3.09862	0	AT3G24600
chr2	9737600	9738199	337	42	4.83425e-69	3.0964	1.17453e-68	AT2G22860
chr5	3399000	3400399	1155	144	3.51746e-230	3.09525	2.3893e-229	AT5G10750
chr5	3399000	3400399	1155	144	3.51746e-230	3.09525	2.3893e-229	AT5G10760
chr4	14830800	14832199	1187	148	1.86254e-236	3.09503	1.31221e-235	AT4G30300
chr4	14830800	14832199	1187	148	1.86254e-236	3.09503	1.31221e-235	AT4G30310
chr4	12883000	12884599	1243	155	1.93754e-247	3.09468	1.42495e-246	AT4G25090
chr4	12883000	12884599	1243	155	1.93754e-247	3.09468	1.42495e-246	AT4G25100
chr1	7238600	7239599	866	108	3.40132e-173	3.09436	1.72943e-172	AT1G20823
chr4	7951800	7952999	962	120	4.99196e-192	3.09364	2.80677e-191	AT4G13680
chr4	958000	958799	689	86	3.61809e-138	3.0917	1.49937e-137	AT4G02170
chr5	3515800	3516999	977	122	1.12383e-194	3.09037	6.39307e-194	AT5G11070
chr2	19557200	19560799	2929	366	0	3.08826	0	AT2G47730
chr2	19557200	19560799	2929	366	0	3.08826	0	AT2G47740
chr2	19557200	19560799	2929	366	0	3.08826	0	AT2G47750
chr1	5522000	5529599	5688	711	0	3.08721	0	AT1G16120
chr1	5522000	5529599	5688	711	0	3.08721	0	AT1G16130
chr1	28597000	28598599	1208	151	1.08531e-239	3.08721	7.74651e-239	AT1G76220
chr3	6844200	6846599	1920	240	0	3.08721	0	AT3G19700
chr4	15820200	15820799	408	51	1.06475e-82	3.08721	2.92629e-82	AT4G32800
chr2	16437800	16440599	2191	274	0	3.0858	0	AT2G39360
chr5	22108400	22110199	1519	190	2.18961e-300	3.08518	2.04528e-299	AT5G54450
chr1	10715600	10720799	4429	554	0	3.08512	0	AT1G30360
chr1	10715600	10720799	4429	554	0	3.08512	0	AT1G30370
chr3	17481400	17482999	1175	147	6.33544e-233	3.08458	4.36469e-232	AT3G47440
chr3	17481400	17482999	1175	147	6.33544e-233	3.08458	4.36469e-232	AT3G47430
chr3	18657400	18658199	631	79	3.40035e-126	3.08232	1.30317e-125	AT3G50330
chr3	10707200	10708599	1046	131	2.49885e-207	3.08132	1.51759e-206	AT3G28560
chr5	22563800	22565199	1038	130	9.26785e-206	3.08127	5.56646e-205	AT5G55740
chr5	22563800	22565199	1038	130	9.26785e-206	3.08127	5.56646e-205	AT5G55750
chr1	4739600	4741199	1493	187	1.06088e-294	3.08102	9.74241e-294	AT1G13830
chr5	19595600	19597399	1453	182	7.40325e-287	3.08085	6.60382e-286	AT5G48360
chr4	11545800	11546399	439	55	1.70506e-88	3.08019	4.93019e-88	AT4G21740
chr4	1511400	1512999	1261	158	3.32591e-249	3.07988	2.46264e-248	AT4G03420
chr5	4814000	4821999	6081	762	0	3.07961	0	AT5G14890
chr5	4814000	4821999	6081	762	0	3.07961	0	AT5G14880
chr1	29357400	29358599	742	93	1.09638e-147	3.07891	4.79426e-147	AT1G78070
chr5	24639400	24640799	1085	136	1.09923e-214	3.0787	6.92184e-214	AT5G61270
chr3	19271400	19272999	1372	172	1.11307e-270	3.07823	9.11693e-270	AT3G51930
chr2	18756400	18757399	741	93	3.38238e-147	3.07476	1.47535e-146	AT2G45530
chr2	6865600	6866999	1203	151	3.037e-237	3.07443	2.14659e-236	AT2G15760
chr4	5839600	5840999	1434	180	2.97431e-282	3.07435	2.58436e-281	AT4G09160
chr5	926600	930799	3471	436	0	3.07216	0	AT5G03640
chr5	17920400	17921599	963	121	3.60894e-190	3.07126	2.01228e-189	AT5G44480
chr1	28173600	28175599	1472	185	4.03467e-289	3.07052	3.63621e-288	AT1G75030
chr5	19010800	19012399	1185	149	3.95064e-233	3.06908	2.72603e-232	AT5G46850
chr5	19010800	19012399	1185	149	3.95064e-233	3.06908	2.72603e-232	AT5G46860
chr5	22809200	22809999	668	84	1.40616e-132	3.06883	5.64473e-132	AT5G56320
chr3	20117600	20118999	1161	146	2.0124e-228	3.06871	1.35849e-227	AT3G54320
chr1	8342400	8342999	270	34	5.56059e-55	3.06451	1.18024e-54	AT1G23510
chr4	7784400	7786199	1199	151	2.71317e-235	3.06421	1.89617e-234	AT4G13390
chr4	7784400	7786199	1199	151	2.71317e-235	3.06421	1.89617e-234	AT4G13395
chr4	11313000	11313799	619	78	1.14097e-122	3.06247	4.26762e-122	AT4G21215
chr1	7500600	7504199	3087	389	0	3.06241	0	AT1G21430
chr1	7500600	7504199	3087	389	0	3.06241	0	AT1G21440
chr1	12069800	12070599	722	91	1.35914e-142	3.06176	5.79779e-142	AT1G33270
chr1	29467200	29468399	714	90	5.04874e-141	3.06148	2.12971e-140	AT1G78320
chr2	13714800	13716799	1451	183	1.50806e-283	3.0598	1.32889e-282	AT2G32290
chr1	22733400	22734399	777	98	4.2811e-153	3.05964	1.93415e-152	AT1G61610
chr1	1708000	1713399	4208	531	0	3.05814	0	AT1G05690
chr1	1708000	1713399	4208	531	0	3.05814	0	AT1G05700
chr1	30241400	30244799	2599	328	0	3.0578	0	AT1G80440
chr1	30241400	30244799	2599	328	0	3.0578	0	AT1G80450
chr1	25466800	25468599	1450	183	4.61908e-283	3.05769	4.04575e-282	AT1G67900
chr1	9329600	9330599	903	114	3.1038e-177	3.05674	1.61974e-176	AT1G26920
chr3	2167400	2170199	2083	263	0	3.0564	0	AT3G06868
chr3	2167400	2170199	2083	263	0	3.0564	0	AT3G06870
chr3	2167400	2170199	2083	263	0	3.0564	0	AT3G06880
chr1	20100200	20103999	2756	348	0	3.05616	0	AT1G53830
chr1	20100200	20103999	2756	348	0	3.05616	0	AT1G53850
chr1	20100200	20103999	2756	348	0	3.05616	0	AT1G53840
chr3	3195800	3197599	1694	214	0	3.05475	0	AT3G10320
chr1	27148200	27150599	1860	235	0	3.05437	0	AT1G72150
chr2	9914200	9915799	1472	186	8.51426e-287	3.05401	7.57934e-286	AT2G23300
chr1	6463800	6467399	2919	369	0	3.0527	0	AT1G18740
chr1	6463800	6467399	2919	369	0	3.0527	0	AT1G18745
chr1	6463800	6467399	2919	369	0	3.0527	0	AT1G18750
chr5	4169600	4175799	4886	618	0	3.05099	0	AT5G13130
chr5	4169600	4175799	4886	618	0	3.05099	0	AT5G13140
chr5	4169600	4175799	4886	618	0	3.05099	0	AT5G13150
chr3	8404000	8404799	664	84	1.24704e-130	3.05046	4.93772e-130	AT3G23440
chr1	18542000	18543799	1453	184	3.32832e-282	3.04736	2.88907e-281	AT1G50040
chr5	2503400	2504399	876	111	4.5314e-171	3.04549	2.27746e-170	AT5G07830
chr3	22129600	22131199	1310	166	1.87126e-254	3.04536	1.41809e-253	AT3G59900
chr3	22129600	22131199	1310	166	1.87126e-254	3.04536	1.41809e-253	AT3G59910
chr4	15924000	15925199	726	92	3.21642e-142	3.04526	1.37004e-141	AT4G33000
chr5	8416200	8418999	2097	266	0	3.04224	0	AT5G24590
chr3	20930600	20931399	607	77	3.72961e-119	3.0421	1.35488e-118	AT3G56450
chr1	11595400	11596199	646	82	1.60607e-126	3.04015	6.16333e-126	AT1G32190
chr5	25973800	25976599	1914	243	0	3.03957	0	AT5G65020
chr5	25973800	25976599	1914	243	0	3.03957	0	AT5G65030
chr5	22045400	22046399	890	113	3.06287e-173	3.0394	1.55916e-172	AT5G54280
chr5	3384800	3387199	1881	239	0	3.03715	0	AT5G10720
chr1	4850200	4851199	692	88	5.68056e-135	3.03459	2.3069e-134	AT1G14185
chr2	16128400	16129199	574	73	2.17031e-112	3.03435	7.52658e-112	AT2G38530
chr5	22192600	22194399	1659	211	0	3.03417	0	AT5G54630
chr1	20273400	20274999	1242	158	5.68395e-240	3.03348	4.06363e-239	AT1G54310
chr4	10262000	10263799	1186	151	5.42365e-229	3.03098	3.66981e-228	AT4G18640
chr1	1486000	1487999	1390	177	7.66606e-268	3.03052	6.20331e-267	AT1G05150
chr1	1486000	1487999	1390	177	7.66606e-268	3.03052	6.20331e-267	AT1G05160
chr3	5003800	5005799	1625	207	0	3.02942	0	AT3G14870
chr4	13662800	13664399	1333	170	2.20977e-256	3.02592	1.68931e-255	AT4G27270
chr4	13662800	13664399	1333	170	2.20977e-256	3.02592	1.68931e-255	AT4G27280
chr1	28776800	28780799	2689	343	0	3.02533	0	AT1G76680
chr1	28776800	28780799	2689	343	0	3.02533	0	AT1G76690
chr1	28776800	28780799	2689	343	0	3.02533	0	AT1G76700
chr5	24075000	24076599	1160	148	2.5321e-223	3.02463	1.66169e-222	AT5G59750
chr5	24075000	24076599	1160	148	2.5321e-223	3.02463	1.66169e-222	AT5G59760
chr5	20582800	20583999	525	67	1.74195e-102	3.02385	5.63515e-102	AT5G50570
chr1	26258800	26260599	1316	168	9.16446e-253	3.02289	6.89114e-252	AT1G69780
chr1	1826600	1832399	4534	579	0	3.02189	0	AT1G06030
chr1	1826600	1832399	4534	579	0	3.02189	0	AT1G06040
chr1	1826600	1832399	4534	579	0	3.02189	0	AT1G06050
chr3	17223600	17224799	986	126	8.88201e-190	3.01983	4.93665e-189	AT3G46770
chr3	20679800	20682399	1885	241	0	3.01836	0	AT3G55720
chr3	20679800	20682399	1885	241	0	3.01836	0	AT3G55730
chr3	20146000	20148599	1994	255	0	3.0176	0	AT3G54420
chr3	20146000	20148599	1994	255	0	3.0176	0	AT3G54430
chr3	20146000	20148599	1994	255	0	3.0176	0	AT3G54440
chr5	15949800	15950999	1125	144	1.31543e-215	3.01485	8.33137e-215	AT5G39850
chr4	17225000	17226599	1218	156	5.5044e-233	3.013	3.79516e-232	AT4G36490
chr4	17225000	17226599	1218	156	5.5044e-233	3.013	3.79516e-232	AT4G36500
chr1	12983600	12984799	929	119	2.56396e-178	3.01262	1.34689e-177	AT1G35350
chr1	4509000	4513999	3831	491	0	3.01097	0	AT1G13210
chr4	14818000	14820599	2091	268	0	3.01089	0	AT4G30260
chr4	14818000	14820599	2091	268	0	3.01089	0	AT4G30270
chr2	18882000	18886599	3351	430	0	3.00734	0	AT2G45880
chr2	18882000	18886599	3351	430	0	3.00734	0	AT2G45890
chr2	18882000	18886599	3351	430	0	3.00734	0	AT2G45900
chr5	18141400	18142199	444	57	2.66944e-86	3.00597	7.57051e-86	AT5G44930
chr3	21462600	21463799	919	118	8.63173e-176	3.00545	4.45385e-175	AT3G57958
chr3	21462600	21463799	919	118	8.63173e-176	3.00545	4.45385e-175	AT3G57960
chr3	945400	946599	880	113	1.99194e-168	3.00525	9.8916e-168	AT3G03770
chr3	4865400	4871399	3839	493	0	3.00502	0	AT3G14490
chr3	4865400	4871399	3839	493	0	3.00502	0	AT3G14510
chr3	2126200	2127399	1090	140	6.754e-208	3.00452	4.12193e-207	AT3G06740
chr3	9307200	9313399	4523	581	0	3.00418	0	AT3G25600
chr3	9307200	9313399	4523	581	0	3.00418	0	AT3G25610
chr5	22731600	22732799	903	116	1.18256e-172	3.00404	5.98841e-172	AT5G56160
chr4	18152600	18156599	3112	400	0	3.00231	0	AT4G38950
chr4	18152600	18156599	3112	400	0	3.00231	0	AT4G38940
chr5	20525800	20526599	521	67	1.45629e-100	3.00081	4.64382e-100	AT5G50400
chr5	14792400	14792999	443	57	8.05125e-86	2.9992	2.27444e-85	AT5G37340
chr5	14792400	14792999	443	57	8.05125e-86	2.9992	2.27444e-85	AT5G37350
chr4	17349000	17350199	979	126	2.01251e-186	2.99839	1.09756e-185	AT4G36830
chr5	26766200	26766999	668	86	5.4808e-128	2.99746	2.12573e-127	AT5G67060
chr2	14989600	14990999	792	102	3.56509e-151	2.99641	1.59414e-150	AT2G35658
chr2	14989600	14990999	792	102	3.56509e-151	2.99641	1.59414e-150	AT2G35660
chr4	17451800	17452999	924	119	6.34534e-176	2.99641	3.27604e-175	AT4G37030
chr2	10120400	10122399	1529	197	3.96104e-289	2.99514	3.57355e-288	AT2G23770
chr2	19460400	19462599	1917	247	0	2.99503	0	AT2G47430
chr3	10045000	10047199	1591	205	1.03295e-300	2.99497	9.67976e-300	AT3G27210
chr4	12166400	12167799	1094	141	1.48926e-207	2.99415	9.05082e-207	AT4G23250
chr4	12166400	12167799	1094	141	1.48926e-207	2.99415	9.05082e-207	AT4G23260
chr5	4932800	4933599	481	62	1.02879e-92	2.99385	3.08743e-92	AT5G15190
chr5	2578200	2579199	783	101	3.96082e-149	2.99169	1.74689e-148	AT5G08050
chr5	17829800	17831199	1062	137	2.77747e-201	2.99144	1.63001e-200	AT5G44260
chr2	12664000	12666199	1651	213	2.42068068553e-311	2.99119	2.35449019803e-310	AT2G29620
chr4	6372800	6373799	713	92	5.74451e-136	2.99073	2.34819e-135	AT4G10265
chr5	26785800	26786599	372	48	3.65405e-72	2.99073	9.12728e-72	AT5G67110
chr3	10520600	10521399	612	79	5.26089e-117	2.98951	1.88522e-116	AT3G28210
chr1	8734400	8735199	581	75	3.3103e-111	2.98945	1.13849e-110	AT1G24650
chr3	18249800	18250999	1208	156	3.31106e-228	2.98826	2.22997e-227	AT3G49220
chr3	6616800	6617999	844	109	3.03973e-160	2.98808	1.44367e-159	AT3G19150
chr1	29391600	29396199	3732	482	0	2.98793	0	AT1G78120
chr1	29391600	29396199	3732	482	0	2.98793	0	AT1G78110
chr4	7239200	7240399	1022	132	1.91318e-193	2.98781	1.08198e-192	AT4G12080
chr2	12937200	12938799	1200	155	1.2226e-226	2.98762	8.15845e-226	AT2G30360
chr2	12937200	12938799	1200	155	1.2226e-226	2.98762	8.15845e-226	AT2G30362
chr3	8900200	8902799	2043	264	0	2.98635	0	AT3G24480
chr3	23398200	23402799	3753	485	0	2.98616	0	AT3G63350
chr3	23398200	23402799	3753	485	0	2.98616	0	AT3G63360
chr3	23398200	23402799	3753	485	0	2.98616	0	AT3G63370
chr3	23398200	23402799	3753	485	0	2.98616	0	AT3G63340
chr1	4528800	4529999	936	121	3.74588e-177	2.98515	1.95247e-176	AT1G13250
chr2	14217400	14223599	5120	662	0	2.98461	0	AT2G33570
chr2	14217400	14223599	5120	662	0	2.98461	0	AT2G33585
chr2	14217400	14223599	5120	662	0	2.98461	0	AT2G33580
chr2	7766800	7767799	727	94	3.76356e-138	2.98458	1.55891e-137	AT2G17880
chr3	995400	996199	688	89	8.72869e-131	2.98315	3.45932e-130	AT3G03870
chr4	6512600	6513599	943	122	3.03152e-178	2.98283	1.59155e-177	AT4G10540
chr1	19305200	19306599	1082	140	4.41943e-204	2.98246	2.62366e-203	AT1G51950
chr5	23412200	23413799	1244	161	3.86067e-234	2.98175	2.68736e-233	AT5G57790
chr3	4791400	4793999	1978	256	0	2.98169	0	AT3G14360
chr3	4791400	4793999	1978	256	0	2.98169	0	AT3G14362
chr4	16642800	16644799	1823	236	0	2.98092	0	AT4G34950
chr2	14522400	14523599	1104	143	7.83429e-208	2.97926	4.77453e-207	AT2G34410
chr2	14522400	14523599	1104	143	7.83429e-208	2.97926	4.77453e-207	AT2G34420
chr4	11517400	11519799	1991	258	0	2.97802	0	AT4G21680
chr5	16438400	16440599	1435	186	4.88358e-269	2.97725	3.97019e-268	AT5G41070
chr5	16438400	16440599	1435	186	4.88358e-269	2.97725	3.97019e-268	AT5G41071
chr4	13959600	13960999	941	122	2.70295e-177	2.9765	1.4114e-176	AT4G28085
chr2	16452200	16453399	964	125	1.60161e-181	2.97607	8.52136e-181	AT2G39400
chr4	13978000	13979799	1318	171	5.83223e-247	2.97437	4.27844e-246	AT4G28150
chr3	18615000	18616599	1449	188	3.19131e-271	2.97431	2.62133e-270	AT3G50210
chr1	4737200	4738399	1025	133	1.23144e-192	2.97405	6.93731e-192	AT1G13820
chr3	19534600	19535799	1017	132	4.54424e-191	2.97319	2.54355e-190	AT3G52700
chr3	19534600	19535799	1017	132	4.54424e-191	2.97319	2.54355e-190	AT3G52710
chr3	8565600	8567399	1502	195	9.12589e-281	2.97243	7.82797e-280	AT3G23770
chr2	18820200	18821999	1471	191	5.65211e-275	2.97204	4.71369e-274	AT2G45680
chr2	18820200	18821999	1471	191	5.65211e-275	2.97204	4.71369e-274	AT2G45685
chr2	15010400	15012399	1393	181	2.94556e-260	2.96995	2.30229e-259	AT2G35710
chr5	17582800	17583799	808	105	4.509e-152	2.9696	2.02661e-151	AT5G43755
chr1	18756800	18758399	1131	147	9.93272e-212	2.96908	6.1743e-211	AT1G50640
chr4	16909800	16913199	2385	310	0	2.96895	0	AT4G35650
chr4	16909800	16913199	2385	310	0	2.96895	0	AT4G35655
chr4	16909800	16913199	2385	310	0	2.96895	0	AT4G35660
chr1	6576000	6579599	2677	348	0	2.96856	0	AT1G19040
chr1	6576000	6579599	2677	348	0	2.96856	0	AT1G19050
chr4	288800	290399	1261	164	1.60382e-235	2.9672	1.12358e-234	AT4G00700
chr4	288800	290399	1261	164	1.60382e-235	2.9672	1.12358e-234	AT4G00710
chr2	14065800	14067799	1384	180	3.22606e-258	2.96715	2.49248e-257	AT2G33180
chr2	16803400	16804799	1107	144	4.97713e-207	2.96661	3.01639e-206	AT2G40230
chr5	7364600	7366599	1545	201	8.49085e-288	2.96625	7.61294e-287	AT5G22240
chr5	7364600	7366599	1545	201	8.49085e-288	2.96625	7.61294e-287	AT5G22250
chr5	19600000	19600599	538	70	6.16624e-102	2.96593	1.98518e-101	AT5G48370
chr5	16690200	16690399	146	19	2.088e-29	2.96535	3.18295e-29	AT5G41740
chr4	17280000	17283799	2809	366	0	2.96174	0	AT4G36648
chr4	17280000	17283799	2809	366	0	2.96174	0	AT4G36650
chr5	15634600	15635999	1013	132	3.55109e-189	2.9615	1.96618e-188	AT5G39050
chr4	12909400	12911999	1849	241	0	2.96071	0	AT4G25180
chr4	12909400	12911999	1849	241	0	2.96071	0	AT4G25170
chr3	4012600	4013799	1028	134	7.75645e-192	2.9605	4.3527e-191	AT3G12630
chr3	21863400	21868999	4364	569	0	2.95971	0	AT3G59140
chr1	6942600	6946599	2675	349	0	2.95784	0	AT1G20020
chr1	6942600	6946599	2675	349	0	2.95784	0	AT1G20030
chr1	25441600	25443399	1211	158	3.52614e-225	2.95776	2.34225e-224	AT1G67850
chr1	25441600	25443399	1211	158	3.52614e-225	2.95776	2.34225e-224	AT1G67855
chr1	25441600	25443399	1211	158	3.52614e-225	2.95776	2.34225e-224	AT1G67856
chr1	2752200	2753599	981	128	6.55016e-183	2.95757	3.50858e-182	AT1G08650
chr3	1038800	1039599	682	89	6.09834e-128	2.95713	2.36419e-127	AT3G04010
chr5	3276800	3278399	1226	160	7.70708e-228	2.95697	5.17866e-227	AT5G10430
chr4	8054600	8057199	2053	268	0	2.95618	0	AT4G13940
chr1	6671000	6672599	1256	164	3.68165e-233	2.95544	2.54446e-232	AT1G19300
chr2	10906200	10907199	842	110	4.51592e-157	2.9539	2.10236e-156	AT2G25625
chr1	3118200	3119599	995	130	4.23351e-185	2.95363	2.29447e-184	AT1G09630
chr5	21469600	21473399	3152	412	0	2.95233	0	AT5G52930
chr5	21469600	21473399	3152	412	0	2.95233	0	AT5G52940
chr4	18120800	18126399	4200	549	0	2.95225	0	AT4G38820
chr4	18120800	18126399	4200	549	0	2.95225	0	AT4G38825
chr4	18120800	18126399	4200	549	0	2.95225	0	AT4G38830
chr4	18120800	18126399	4200	549	0	2.95225	0	AT4G38840
chr4	18120800	18126399	4200	549	0	2.95225	0	AT4G38850
chr5	20216400	20217199	543	71	4.36556e-102	2.95133	1.40806e-101	AT5G49760
chr4	15272800	15275399	1956	256	0	2.94853	0	AT4G31500
chr4	15272800	15275399	1956	256	0	2.94853	0	AT4G31490
chr1	3240600	3241799	871	114	6.34197e-162	2.94842	3.02685e-161	AT1G09950
chr1	6520400	6525999	3918	513	0	2.94729	0	AT1G18879
chr1	6520400	6525999	3918	513	0	2.94729	0	AT1G18890
chr1	6520400	6525999	3918	513	0	2.94729	0	AT1G18880
chr3	7387600	7390399	2184	286	0	2.94688	0	AT3G21080
chr1	29430000	29434399	3145	412	0	2.94577	0	AT1G78230
chr1	29430000	29434399	3145	412	0	2.94577	0	AT1G78240
chr2	8647800	8649599	1290	169	3.64326e-238	2.94564	2.58981e-237	AT2G20030
chr2	8647800	8649599	1290	169	3.64326e-238	2.94564	2.58981e-237	AT2G20050
chr3	252400	254999	1931	253	0	2.94536	0	AT3G01680
chr4	8020600	8023199	1533	201	3.81911e-282	2.94322	3.30851e-281	AT4G13850
chr4	8020600	8023199	1533	201	3.81911e-282	2.94322	3.30851e-281	AT4G13860
chr5	758200	759799	1365	179	1.80904e-251	2.94277	1.35097e-250	AT5G03190
chr5	26602600	26604599	1525	200	1.40253e-280	2.9425	1.19951e-279	AT5G66650
chr1	3760600	3761399	564	74	2.24079e-105	2.94119	7.41965e-105	AT1G11220
chr3	7531200	7532199	792	104	9.84074e-147	2.93879	4.2881e-146	AT3G21390
chr4	9833800	9834799	830	109	1.26523e-153	2.93851	5.72509e-153	AT4G17670
chr5	904400	905399	845	111	2.75279e-156	2.93772	1.27339e-155	AT5G03570
chr3	7822000	7822599	274	36	2.30195e-52	2.93714	4.73483e-52	AT3G22170
chr1	8414400	8414999	449	59	3.24371e-84	2.93677	9.04895e-84	AT1G23800
chr2	13178800	13179799	662	87	6.3299e-123	2.9364	2.37269e-122	AT2G30970
chr1	6164200	6165799	1027	135	3.60822e-189	2.93571	1.99655e-188	AT1G17920
chr5	17871400	17873999	1681	221	8.194e-308	2.93529	7.82154e-307	AT5G44360
chr4	11884600	11885599	654	86	2.33158e-121	2.93464	8.62833e-121	AT4G22570
chr3	913000	913799	692	91	2.98308e-128	2.93454	1.16112e-127	AT3G03690
chr2	17111600	17114799	2494	328	0	2.93426	0	AT2G41000
chr2	17111600	17114799	2494	328	0	2.93426	0	AT2G41010
chr1	18342200	18343799	1285	169	8.06427e-236	2.93422	5.67233e-235	AT1G49560
chr5	511400	512399	517	68	1.91831e-96	2.93398	5.9137e-96	AT5G02390
chr3	5141000	5141399	266	35	8.56218e-51	2.93285	1.73493e-50	AT3G15260
chr3	5141000	5141399	266	35	8.56218e-51	2.93285	1.73493e-50	AT3G15270
chr1	27580800	27582599	1231	162	8.38143e-226	2.93237	5.57589e-225	AT1G73360
chr3	22187400	22188799	1003	132	1.78906e-184	2.93226	9.66028e-184	AT3G60080
chr1	1965800	1966999	889	117	8.3408e-164	2.93219	4.02492e-163	AT1G06450
chr4	9358400	9360199	1284	169	2.36902e-235	2.93193	1.65699e-234	AT4G16620
chr5	2671200	2671999	509	67	7.0773e-95	2.9317	2.15962e-94	AT5G08305
chr3	9409200	9410799	1238	163	6.70675e-227	2.93095	4.47887e-226	AT3G25780
chr4	11940400	11943799	2642	348	0	2.92974	0	AT4G22730
chr4	13411400	13413599	1655	218	3.48169e-302	2.92966	3.27324e-301	AT4G26580
chr4	13411400	13413599	1655	218	3.48169e-302	2.92966	3.27324e-301	AT4G26582
chr4	405400	407399	1631	215	1.71365e-297	2.92746	1.58878e-296	AT4G00950
chr3	22253400	22256199	2154	284	0	2.92687	0	AT3G60220
chr4	16798600	16799799	796	105	1.99807e-146	2.9255	8.69355e-146	AT4G35300
chr4	18248400	18249799	849	112	5.58331e-156	2.92527	2.57453e-155	AT4G39180
chr5	15488600	15490599	1516	200	2.28547e-276	2.92513	1.91887e-275	AT5G38700
chr3	3405800	3407399	1205	159	3.55991e-220	2.9246	2.30324e-219	AT3G10880
chr2	18591600	18592599	970	128	9.5389e-178	2.92441	4.98689e-177	AT2G45080
chr1	18321400	18322199	447	59	2.8102e-83	2.92369	7.76257e-83	AT1G49500
chr1	19047800	19048399	409	54	2.23229e-76	2.92284	5.8212e-76	AT1G51380
chr4	17453800	17455799	1848	244	0	2.92273	0	AT4G37030
chr4	17453800	17455799	1848	244	0	2.92273	0	AT4G37040
chr5	17176200	17177799	1090	144	4.80781e-199	2.92106	2.79894e-198	AT5G42830
chr1	27990200	27996999	5194	687	0	2.91757	0	AT1G74470
chr1	27990200	27996999	5194	687	0	2.91757	0	AT1G74480
chr1	27990200	27996999	5194	687	0	2.91757	0	AT1G74490
chr3	20137600	20138999	1005	133	3.08517e-183	2.91602	1.65358e-182	AT3G54390
chr2	6399400	6401599	1783	236	0	2.91552	0	AT2G14890
chr3	22501400	22502799	1148	152	9.23347e-209	2.91457	5.65493e-208	AT3G60910
chr4	7268400	7269999	1231	163	1.23575e-223	2.91438	8.14024e-223	AT4G12150
chr5	5577400	5581599	3119	413	0	2.91435	0	AT5G16970
chr5	5577400	5581599	3119	413	0	2.91435	0	AT5G16980
chr1	22197400	22201599	2997	397	0	2.91321	0	AT1G60200
chr1	22197400	22201599	2997	397	0	2.91321	0	AT1G60190
chr5	10338800	10340399	619	82	1.07758e-113	2.91308	3.76549e-113	AT5G28380
chr5	817800	823199	3985	528	0	2.91253	0	AT5G03360
chr2	19289200	19291599	1954	259	0	2.91139	0	AT2G46950
chr4	1060000	1062999	2074	275	0	2.9104	0	AT4G02410
chr4	15895000	15896399	1131	150	3.60949e-205	2.90969	2.16049e-204	AT4G32920
chr1	22824200	22826599	1832	243	0	2.90934	0	AT1G61800
chr2	19395400	19397399	1485	197	2.03247e-268	2.90895	1.64619e-267	AT2G47240
chr4	13749800	13752999	2382	316	0	2.90891	0	AT4G27520
chr4	13749800	13752999	2382	316	0	2.90891	0	AT4G27530
chr3	12599600	12600599	761	101	9.06328e-139	2.90763	3.77204e-138	AT3G30842
chr3	8180800	8181999	964	128	5.93041e-175	2.90632	3.04738e-174	AT3G23030
chr4	13395400	13398199	2779	369	0	2.90628	0	AT4G26540
chr4	13395400	13398199	2779	369	0	2.90628	0	AT4G26542
chr4	17791000	17792599	1249	166	1.54529e-225	2.90356	1.02725e-224	AT4G37840
chr2	7200600	7201799	910	121	6.1513e-165	2.90223	2.98489e-164	AT2G16600
chr1	22092400	22096599	3113	414	0	2.90172	0	AT1G59990
chr1	22092400	22096599	3113	414	0	2.90172	0	AT1G60000
chr1	22092400	22096599	3113	414	0	2.90172	0	AT1G60010
chr1	28377400	28378599	1060	141	1.45203e-191	2.9011	8.14312e-191	AT1G75580
chr5	22416200	22417199	872	116	4.76835e-158	2.90091	2.23661e-157	AT5G55260
chr3	17874600	17875599	669	89	7.39919e-122	2.90076	2.74868e-121	AT3G48260
chr1	3540800	3542999	1586	211	3.40602e-285	2.90066	3.01662e-284	AT1G10680
chr5	10316000	10317199	511	68	1.20973e-93	2.89993	3.65814e-93	AT5G28340
chr3	5216200	5217399	826	110	1.35334e-149	2.89777	5.99307e-149	AT3G15460
chr3	5216200	5217399	826	110	1.35334e-149	2.89777	5.99307e-149	AT3G15470
chr3	10686600	10687399	548	73	4.47515e-100	2.8969	1.4208e-99	AT3G28510
chr4	14369000	14370599	1381	184	4.17943e-248	2.89636	3.08154e-247	AT4G29140
chr1	5612200	5614999	2139	285	0	2.89629	0	AT1G16420
chr1	5612200	5614999	2139	285	0	2.89629	0	AT1G16430
chr5	15501200	15501999	510	68	3.51857e-93	2.89426	1.06068e-92	AT5G38710
chr4	13128400	13130599	1574	210	8.78943e-282	2.89242	7.59167e-281	AT4G25810
chr4	13128400	13130599	1574	210	8.78943e-282	2.89242	7.59167e-281	AT4G25820
chr2	322600	323799	712	95	6.35453e-129	2.89223	2.49458e-128	AT2G01730
chr4	12147200	12151599	2803	374	0	2.89219	0	AT4G23200
chr4	12147200	12151599	2803	374	0	2.89219	0	AT4G23210
chr5	23230400	23235399	4039	539	0	2.89175	0	AT5G57345
chr5	23230400	23235399	4039	539	0	2.89175	0	AT5G57350
chr5	26181600	26183999	1686	225	1.6368e-301	2.89169	1.53549e-300	AT5G65500
chr1	518200	521999	3183	425	0	2.89017	0	AT1G02500
chr1	518200	521999	3183	425	0	2.89017	0	AT1G02510
chr3	7021200	7022599	1108	148	8.40436e-199	2.88904	4.88945e-198	AT3G20110
chr5	8784800	8785799	509	68	1.02141e-92	2.88858	3.06633e-92	AT5G25310
chr3	1049800	1051599	1406	188	4.03718e-251	2.88605	3.00976e-250	AT3G04050
chr1	18987800	18988799	860	115	1.23274e-154	2.88587	5.61007e-154	AT1G51210
chr1	57200	58999	1488	199	1.57487e-265	2.88553	1.26265e-264	AT1G01120
chr5	5191600	5192199	329	44	1.03923e-60	2.88549	2.33424e-60	AT5G15900
chr5	9173400	9174599	1226	164	3.54015e-219	2.88485	2.27525e-218	AT5G26230
chr3	8941200	8942599	1054	141	8.60898e-189	2.88468	4.75157e-188	AT3G24518
chr3	8941200	8942599	1054	141	8.60898e-189	2.88468	4.75157e-188	AT3G24520
chr5	1205400	1207999	1958	262	0	2.88395	0	AT5G04310
chr4	647800	649999	1532	205	4.71165e-273	2.8839	3.90324e-272	AT4G01516
chr1	1375600	1379199	2966	397	0	2.88308	0	AT1G04870
chr1	1375600	1379199	2966	397	0	2.88308	0	AT1G04880
chr4	11758600	11759599	762	102	4.30399e-137	2.88291	1.77265e-136	AT4G22217
chr4	11758600	11759599	762	102	4.30399e-137	2.88291	1.77265e-136	AT4G22220
chr5	24753000	24756399	2525	338	0	2.88284	0	AT5G61560
chr5	17522600	17523999	1128	151	1.2124e-201	2.88276	7.13442e-201	AT5G43620
chr5	22525400	22526599	986	132	1.40328e-176	2.88256	7.27953e-176	AT5G55600
chr5	22525400	22526599	986	132	1.40328e-176	2.88256	7.27953e-176	AT5G55610
chr3	18437600	18442199	3144	421	0	2.88188	0	AT3G49710
chr3	18437600	18442199	3144	421	0	2.88188	0	AT3G49720
chr5	26500200	26503399	2427	325	0	2.88179	0	AT5G66330
chr5	26500200	26503399	2427	325	0	2.88179	0	AT5G66340
chr3	5999400	6000399	739	99	7.24309e-133	2.88062	2.91026e-132	AT3G17520
chr1	8385200	8386399	948	127	1.08237e-169	2.88058	5.39945e-169	AT1G23710
chr1	7373800	7376999	2157	289	0	2.88024	0	AT1G21065
chr1	7373800	7376999	2157	289	0	2.88024	0	AT1G21070
chr1	7373800	7376999	2157	289	0	2.88024	0	AT1G21060
chr5	23737800	23741599	2745	368	0	2.87853	0	AT5G58782
chr5	23737800	23741599	2745	368	0	2.87853	0	AT5G58784
chr3	4526400	4527799	992	133	3.2086e-177	2.8783	1.67343e-176	AT3G13782
chr1	26323200	26324599	865	116	8.14627e-155	2.87762	3.71118e-154	AT1G69890
chr5	17550000	17552599	1961	263	0	2.87738	0	AT5G43700
chr5	17550000	17552599	1961	263	0	2.87738	0	AT5G43710
chr2	8086800	8088399	1364	183	2.14503e-242	2.87633	1.54879e-241	AT2G18650
chr5	16043600	16044399	559	75	6.81287e-101	2.87625	2.17807e-100	AT5G40100
chr1	3842000	3844599	1714	230	8.6118e-304	2.8758	8.14011e-303	AT1G11410
chr1	3842000	3844599	1714	230	8.6118e-304	2.8758	8.14011e-303	AT1G11420
chr1	1884800	1886399	1169	157	8.63831e-208	2.87337	5.25719e-207	AT1G06170
chr4	11670800	11673599	1846	248	0	2.87247	0	AT4G22030
chr4	11583800	11585399	1042	140	2.16869e-185	2.87221	1.17758e-184	AT4G21830
chr4	11583800	11585399	1042	140	2.16869e-185	2.87221	1.17758e-184	AT4G21820
chr5	2360400	2364399	2992	402	0	2.87218	0	AT5G07460
chr5	2360400	2364399	2992	402	0	2.87218	0	AT5G07470
chr5	16942600	16943599	625	84	3.39879e-112	2.87129	1.17542e-111	AT5G42380
chr2	6370600	6371199	372	50	8.58761e-68	2.8711	2.06003e-67	AT2G14835
chr4	17590800	17593999	2187	294	0	2.87063	0	AT4G37409
chr4	17590800	17593999	2187	294	0	2.87063	0	AT4G37410
chr4	17590800	17593999	2187	294	0	2.87063	0	AT4G37420
chr2	18833200	18836199	2037	274	0	2.86891	0	AT2G45720
chr3	565000	569799	3880	522	0	2.86838	0	AT3G02640
chr3	565000	569799	3880	522	0	2.86838	0	AT3G02645
chr3	565000	569799	3880	522	0	2.86838	0	AT3G02650
chr5	251600	254999	2579	347	0	2.86812	0	AT5G01670
chr5	251600	254999	2579	347	0	2.86812	0	AT5G01680
chr3	1304600	1305999	951	128	5.89175e-169	2.86712	2.93242e-168	AT3G04760
chr4	18576400	18577399	884	119	3.33904e-157	2.86669	1.5578e-156	AT4G40070
chr4	8470400	8471999	1218	164	1.67653e-215	2.86602	1.06107e-214	AT4G14750
chr1	27639200	27640599	1166	157	2.05208e-206	2.86599	1.23893e-205	AT1G73500
chr4	16875800	16877399	1166	157	2.05208e-206	2.86599	1.23893e-205	AT4G35550
chr3	20065600	20068399	2146	289	0	2.86555	0	AT3G54200
chr3	20065600	20068399	2146	289	0	2.86555	0	AT3G54210
chr4	483800	484599	542	73	2.61676e-97	2.86518	8.12435e-97	AT4G01120
chr3	20736400	20737599	928	125	9.84895e-165	2.86493	4.77118e-164	AT3G55880
chr1	7548000	7549799	1158	156	7.45001e-205	2.86457	4.43793e-204	AT1G21540
chr2	10135000	10137599	2004	270	0	2.86424	0	AT2G23810
chr4	12169200	12176999	4986	672	0	2.86325	0	AT4G23260
chr4	12169200	12176999	4986	672	0	2.86325	0	AT4G23271
chr4	12169200	12176999	4986	672	0	2.86325	0	AT4G23280
chr4	12169200	12176999	4986	672	0	2.86325	0	AT4G23270
chr3	7560400	7561199	638	86	6.08913e-114	2.86285	2.13034e-113	AT3G21465
chr1	19154400	19157199	2047	276	0	2.8621	0	AT1G51660
chr1	19154400	19157199	2047	276	0	2.8621	0	AT1G51670
chr4	14146800	14147599	608	82	1.2983e-108	2.86132	4.39236e-108	AT4G28650
chr4	14146800	14147599	608	82	1.2983e-108	2.86132	4.39236e-108	AT4G28652
chr1	10987400	10989799	1727	233	1.9739e-303	2.86031	1.86377e-302	AT1G30860
chr3	7935000	7935799	541	73	7.51868e-97	2.8599	2.32607e-96	AT3G22410
chr4	1505600	1506599	726	98	5.20647e-129	2.85882	2.04573e-128	AT4G03415
chr5	23760200	23762399	1696	229	1.18564e-297	2.85803	1.10158e-296	AT5G58840
chr3	8432600	8433199	385	52	1.52974e-69	2.85715	3.726e-69	AT3G23510
chr5	20759800	20762399	1769	239	4.81448706291e-310	2.85631	0	AT5G51060
chr2	7994200	7997199	2028	274	0	2.85623	0	AT2G18420
chr2	7994200	7997199	2028	274	0	2.85623	0	AT2G18440
chr5	23727200	23731399	3271	442	0	2.85584	0	AT5G58740
chr5	23727200	23731399	3271	442	0	2.85584	0	AT5G58750
chr5	23727200	23731399	3271	442	0	2.85584	0	AT5G58760
chr1	26293800	26295799	1295	175	1.25794e-227	2.85567	8.43305e-227	AT1G69840
chr5	8188400	8189599	651	88	1.08517e-115	2.85479	3.84596e-115	AT5G24165
chr5	8188400	8189599	651	88	1.08517e-115	2.85479	3.84596e-115	AT5G24170
chr2	17891400	17892399	673	91	1.85371e-119	2.85397	6.74815e-119	AT2G43018
chr2	17891400	17892399	673	91	1.85371e-119	2.85397	6.74815e-119	AT2G43020
chr5	8706200	8707399	769	104	4.36813e-136	2.85344	1.78808e-135	AT5G25190
chr5	26732800	26733199	244	33	7.22128e-45	2.85333	1.36485e-44	AT5G66950
chr1	5799600	5800399	451	61	7.41667e-81	2.85314	2.00423e-80	AT1G16960
chr4	10022800	10023399	340	46	1.54486e-61	2.85231	3.49701e-61	AT4G18050
chr2	16772200	16776799	3104	420	0	2.85199	0	AT2G40140
chr2	16772200	16776799	3104	420	0	2.85199	0	AT2G40150
chr5	6833600	6837599	2867	388	0	2.85149	0	AT5G20250
chr5	6833600	6837599	2867	388	0	2.85149	0	AT5G20260
chr2	14767800	14768399	399	54	9.44e-72	2.85138	2.35056e-71	AT2G35040
chr2	13141400	13143199	1262	171	6.16466e-221	2.848	4.00037e-220	AT2G30870
chr2	13141400	13143199	1262	171	6.16466e-221	2.848	4.00037e-220	AT2G30880
chr4	11929800	11931599	1387	188	2.03164e-242	2.84705	1.46814e-241	AT4G22690
chr1	18284400	18285799	826	112	2.27149e-145	2.84602	9.82923e-145	AT1G49410
chr1	18284400	18285799	826	112	2.27149e-145	2.84602	9.82923e-145	AT1G49405
chr3	7611200	7612199	730	99	9.59834e-129	2.84553	3.75784e-128	AT3G21620
chr4	18286600	18287399	553	75	3.81735e-98	2.84538	1.19369e-97	AT4G39300
chr3	6180800	6182999	1725	234	1.97024e-300	2.84478	1.84433e-299	AT3G18050
chr2	12712800	12713399	258	35	4.41365e-47	2.84464	8.55346e-47	AT2G29760
chr4	12256200	12257199	656	89	6.98072e-116	2.84439	2.4791e-115	AT4G23493
chr1	9670800	9676199	3818	518	0	2.84434	0	AT1G27760
chr1	9670800	9676199	3818	518	0	2.84434	0	AT1G27770
chr3	2365200	2367999	2122	288	0	2.84334	0	AT3G07390
chr3	2365200	2367999	2122	288	0	2.84334	0	AT3G07400
chr5	1035800	1037199	1149	156	9.49215e-201	2.84231	5.55942e-200	AT5G03870
chr5	24744600	24751799	5257	714	0	2.84129	0	AT5G61530
chr5	24744600	24751799	5257	714	0	2.84129	0	AT5G61540
chr5	24744600	24751799	5257	714	0	2.84129	0	AT5G61550
chr5	21128000	21128999	802	109	1.07757e-140	2.83938	4.53453e-140	AT5G52030
chr1	29062400	29065799	2124	289	0	2.83617	0	AT1G77320
chr1	29062400	29065799	2124	289	0	2.83617	0	AT1G77330
chr4	13454800	13459999	4020	547	0	2.83606	0	AT4G26680
chr4	13454800	13459999	4020	547	0	2.83606	0	AT4G26690
chr5	20930200	20933399	2137	291	0	2.83392	0	AT5G51530
chr5	20930200	20933399	2137	291	0	2.83392	0	AT5G51540
chr2	917200	918799	1219	166	8.72225e-212	2.83382	5.42572e-211	AT2G03090
chr5	14239000	14239799	697	95	4.69068e-122	2.8313	1.74548e-121	AT5G36180
chr2	8838200	8839799	1181	161	6.59341e-205	2.83074	3.93034e-204	AT2G20510
chr2	8838200	8839799	1181	161	6.59341e-205	2.83074	3.93034e-204	AT2G20515
chr2	18072400	18075599	2213	302	0	2.82781	0	AT2G43540
chr2	18072400	18075599	2213	302	0	2.82781	0	AT2G43550
chr2	18072400	18075599	2213	302	0	2.82781	0	AT2G43560
chr4	13653400	13655999	2198	300	0	2.82737	0	AT4G27260
chr1	17451400	17451999	337	46	3.60185e-60	2.82715	8.03638e-60	AT1G47530
chr3	22194000	22197399	2366	323	0	2.82676	0	AT3G60100
chr5	2846400	2847799	1018	139	1.5288e-176	2.82624	7.92593e-176	AT5G08730
chr5	6344400	6345799	886	121	6.01784e-154	2.82569	2.72728e-153	AT5G19000
chr5	6344400	6345799	886	121	6.01784e-154	2.82569	2.72728e-153	AT5G19010
chr2	13916400	13919199	1962	268	0	2.82514	0	AT2G32800
chr2	13916400	13919199	1962	268	0	2.82514	0	AT2G32810
chr3	3001200	3003399	1559	213	1.19504e-268	2.82451	9.68815e-268	AT3G09780
chr4	15875000	15876599	1346	184	4.11477e-232	2.82295	2.8192e-231	AT4G32890
chr5	20259400	20260599	1002	137	1.98205e-173	2.82243	1.01015e-172	AT5G49850
chr5	8857000	8858799	1097	150	1.35202e-189	2.82222	7.505e-189	AT5G25450
chr2	14572800	14574399	1214	166	1.59101e-209	2.82219	9.806e-209	AT2G34600
chr5	16586200	16586599	234	32	2.16977e-42	2.8219	3.99526e-42	AT5G41430
chr1	19600400	19602199	1455	199	1.75559e-250	2.82154	1.30657e-249	AT1G52615
chr2	16374600	16377199	1857	254	0	2.82133	0	AT2G39220
chr2	15706600	15706999	212	29	1.31334e-38	2.82107	2.29558e-38	AT2G37430
chr2	1117400	1117999	497	68	3.13707e-87	2.82048	8.97262e-87	AT2G03667
chr2	1117400	1117999	497	68	3.13707e-87	2.82048	8.97262e-87	AT2G03670
chr5	97600	98399	592	81	2.05252e-103	2.82041	6.70202e-103	AT5G01240
chr3	9195400	9196999	1162	159	1.93676e-200	2.82023	1.13357e-199	AT3G25250
chr2	8968400	8971799	2353	322	0	2.81995	0	AT2G20830
chr2	8968400	8971799	2353	322	0	2.81995	0	AT2G20835
chr2	8968400	8971799	2353	322	0	2.81995	0	AT2G20840
chr4	10499000	10501199	1403	192	2.12861e-241	2.81989	1.53186e-240	AT4G19200
chr1	11123000	11124199	738	101	3.11355e-128	2.81975	1.20975e-127	AT1G31160
chr1	23016600	23017599	657	90	2.87346e-114	2.81708	1.00855e-113	AT1G62300
chr2	16933800	16935599	1146	157	2.50086e-197	2.81683	1.44338e-196	AT2G40540
chr2	16933800	16935599	1146	157	2.50086e-197	2.81683	1.44338e-196	AT2G40550
chr3	5135200	5135999	518	71	1.50663e-90	2.81545	4.43739e-90	AT3G15240
chr1	9763200	9764399	642	88	1.3208e-111	2.81532	4.55152e-111	AT1G28010
chr2	18305400	18306399	598	82	4.54763e-104	2.81425	1.49275e-103	AT2G44290
chr5	24667800	24672199	3163	434	0	2.81245	0	AT5G61350
chr5	24667800	24672199	3163	434	0	2.81245	0	AT5G61360
chr5	24667800	24672199	3163	434	0	2.81245	0	AT5G61370
chr3	1513000	1515599	1851	254	0	2.81222	0	AT3G05310
chr3	1513000	1515599	1851	254	0	2.81222	0	AT3G05320
chr5	26551400	26552799	925	127	3.1768e-159	2.8107	1.49653e-158	AT5G66510
chr5	26551400	26552799	925	127	3.1768e-159	2.8107	1.49653e-158	AT5G66520
chr4	11773200	11775599	1798	247	1.19021e-306	2.80911	1.13239e-305	AT4G22265
chr4	11773200	11775599	1798	247	1.19021e-306	2.80911	1.13239e-305	AT4G22270
chr5	6577600	6579799	1594	219	4.003e-272	2.8088	3.30988e-271	AT5G19490
chr5	6577600	6579799	1594	219	4.003e-272	2.8088	3.30988e-271	AT5G19500
chr5	24958200	24959199	837	115	3.68485e-144	2.80869	1.58272e-143	AT5G62150
chr2	151200	151799	422	58	6.59635e-74	2.80776	1.67895e-73	AT2G01300
chr3	7488400	7489799	953	131	1.20316e-163	2.80736	5.79951e-163	AT3G21295
chr3	7488400	7489799	953	131	1.20316e-163	2.80736	5.79951e-163	AT3G21290
chr3	6434200	6435799	1302	179	1.54658e-222	2.80695	1.01189e-221	AT3G18710
chr3	20888400	20889599	749	103	4.29653e-129	2.80621	1.68972e-128	AT3G56320
chr5	15513000	15516999	3585	493	0	2.8062	0	AT5G38740
chr4	10026000	10027199	836	115	1.03687e-143	2.80533	4.44922e-143	AT4G18050
chr4	17540400	17542399	1541	212	1.35582e-262	2.80506	1.06932e-261	AT4G37260
chr4	17540400	17542399	1541	212	1.35582e-262	2.80506	1.06932e-261	AT4G37270
chr5	4556200	4559599	2515	346	0	2.80503	0	AT5G14120
chr5	4556200	4559599	2515	346	0	2.80503	0	AT5G14130
chr1	3810200	3811199	596	82	3.61436e-103	2.80484	1.1771e-102	AT1G11330
chr1	1799600	1801799	1613	222	1.53079e-274	2.80387	1.2742e-273	AT1G05930
chr1	1799600	1801799	1613	222	1.53079e-274	2.80387	1.2742e-273	AT1G05940
chr1	28786800	28788399	1206	166	6.32081e-206	2.80359	3.80427e-205	AT1G76705
chr5	24652600	24656799	3297	454	0	2.80246	0	AT5G61300
chr5	24652600	24656799	3297	454	0	2.80246	0	AT5G61310
chr5	24652600	24656799	3297	454	0	2.80246	0	AT5G61320
chr3	7194800	7195799	806	111	2.17158e-138	2.80213	9.01633e-138	AT3G20600
chr3	22249200	22250799	1125	155	5.67114e-192	2.8009	3.18659e-191	AT3G60200
chr2	11254000	11254999	704	97	4.1336e-121	2.80077	1.5271e-120	AT2G26460
chr5	22535800	22536799	820	113	1.33299e-140	2.80034	5.60396e-140	AT5G55650
chr5	6953400	6953999	312	43	4.87565e-55	2.80003	1.03536e-54	AT5G20550
chr1	24928000	24928999	682	94	2.41939e-117	2.79984	8.69483e-117	AT1G66810
chr5	25229400	25230399	740	102	4.333e-127	2.79967	1.67311e-126	AT5G62840
chr5	25229400	25230399	740	102	4.333e-127	2.79967	1.67311e-126	AT5G62850
chr4	10347400	10349799	1828	252	6.19983609625e-310	2.79931	0	AT4G18880
chr1	588400	590199	1131	156	1.24715e-192	2.79778	7.02128e-192	AT1G02700
chr1	588400	590199	1131	156	1.24715e-192	2.79778	7.02128e-192	AT1G02710
chr1	28602800	28603999	1044	144	5.09641e-178	2.79778	2.67079e-177	AT1G76240
chr2	11264000	11264399	203	28	1.36261e-36	2.79778	2.31394e-36	AT2G26480
chr5	7804200	7805799	1363	188	1.37441e-231	2.79778	9.38716e-231	AT5G23190
chr1	3516400	3517999	1109	153	7.25305e-189	2.79715	4.00572e-188	AT1G10640
chr4	13495200	13496599	1022	141	2.96642e-174	2.7971	1.51805e-173	AT4G26830
chr5	6545400	6547199	1319	182	4.63297e-224	2.79672	3.0565e-223	AT5G19410
chr4	17872000	17873399	985	136	7.87907e-168	2.79495	3.89264e-167	AT4G38050
chr4	17872000	17873399	985	136	7.87907e-168	2.79495	3.89264e-167	AT4G38052
chr3	16890400	16891399	1166	161	3.69343e-198	2.79479	2.14302e-197	AT3G45950
chr5	21601400	21604399	1832	253	0	2.79435	0	AT5G53240
chr5	21601400	21604399	1832	253	0	2.79435	0	AT5G53250
chr1	25574400	25575399	753	104	7.44816e-129	2.79407	2.92127e-128	AT1G68238
chr1	25574400	25575399	753	104	7.44816e-129	2.79407	2.92127e-128	AT1G68240
chr3	16263200	16263599	340	47	1.79263e-59	2.79162	3.97324e-59	AT3G44716
chr3	20196200	20199399	2416	334	0	2.79143	0	AT3G54560
chr3	20196200	20199399	2416	334	0	2.79143	0	AT3G54570
chr1	7032000	7033199	1027	142	1.82184e-174	2.79099	9.33412e-174	AT1G20310
chr1	23886000	23886999	658	91	1.11334e-112	2.79036	3.86871e-112	AT1G64355
chr4	16969200	16969999	470	65	3.28354e-81	2.79036	8.90633e-81	AT4G35810
chr2	18871600	18874199	2132	295	0	2.78895	0	AT2G45850
chr2	15158400	15159399	766	106	1.27662e-130	2.78868	5.05256e-130	AT2G36090
chr3	3748800	3749399	448	62	1.9362e-77	2.78845	5.08864e-77	AT3G11870
chr1	24828400	24829599	643	89	5.09579e-110	2.78803	1.73747e-109	AT1G66550
chr3	20345000	20346999	1567	217	4.25477e-264	2.78667	3.38633e-263	AT3G54920
chr4	9449000	9453199	2809	389	0	2.78662	0	AT4G16780
chr4	9449000	9453199	2809	389	0	2.78662	0	AT4G16790
chr1	4089600	4090599	628	87	2.33203e-107	2.78558	7.8379e-107	AT1G12090
chr1	12177600	12179599	1660	230	2.30738e-279	2.7852	1.96183e-278	AT1G33590
chr5	4068400	4068999	368	51	6.59098e-64	2.78454	1.52848e-63	AT5G12880
chr3	20192800	20194599	1277	177	2.0862e-215	2.78416	1.31939e-214	AT3G54550
chr4	17554600	17556399	844	117	3.07267e-143	2.78377	1.31395e-142	AT4G37300
chr4	17554600	17556399	844	117	3.07267e-143	2.78377	1.31395e-142	AT4G37310
chr4	8306800	8307799	714	99	1.55517e-121	2.78317	5.7649e-121	AT4G14440
chr3	6142400	6143399	742	103	5.80864e-126	2.77999	2.22223e-125	AT3G17930
chr2	14929000	14932799	2687	373	0	2.77994	0	AT2G35550
chr3	5789400	5790599	950	132	2.77466e-160	2.77732	1.31849e-159	AT3G16950
chr3	18030800	18031599	439	61	1.94095e-75	2.77722	5.01642e-75	AT3G48670
chr1	7337800	7339599	1280	178	9.81485e-215	2.77502	6.18485e-214	AT1G21000
chr2	16540000	16542199	1582	220	9.53834e-265	2.77498	7.61931e-264	AT2G39681
chr2	16540000	16542199	1582	220	9.53834e-265	2.77498	7.61931e-264	AT2G39690
chr1	7534000	7534999	647	90	8.64616e-110	2.7742	2.94341e-109	AT1G21520
chr5	22090400	22091199	611	85	8.29317e-104	2.77395	2.71506e-103	AT5G54400
chr5	21920000	21921199	776	108	4.71623e-131	2.77277	1.87253e-130	AT5G54010
chr1	4899000	4899999	711	99	3.36056e-120	2.77147	1.23159e-119	AT1G14345
chr3	19007000	19008599	1249	174	5.60177e-209	2.77006	3.44041e-208	AT3G51160
chr2	9678000	9679399	904	126	7.23957e-152	2.76869	3.24886e-151	AT2G22760
chr1	27982600	27988199	3745	522	0	2.76858	0	AT1G74453
chr1	27982600	27988199	3745	522	0	2.76858	0	AT1G74456
chr1	27982600	27988199	3745	522	0	2.76858	0	AT1G74458
chr1	27982600	27988199	3745	522	0	2.76858	0	AT1G74460
chr1	27982600	27988199	3745	522	0	2.76858	0	AT1G74450
chr5	23753600	23754799	868	121	6.88664e-146	2.76828	2.99039e-145	AT5G58820
chr4	9660600	9663599	2360	329	0	2.76817	0	AT4G17230
chr1	7929800	7930799	746	104	9.76948e-126	2.7681	3.72935e-125	AT1G22460
chr3	9809600	9810799	717	100	7.28873e-121	2.76691	2.68816e-120	AT3G26700
chr5	447800	450399	1634	228	7.97539e-272	2.76562	6.5882e-271	AT5G02230
chr5	19281400	19282999	1125	157	5.96334e-188	2.76521	3.27064e-187	AT5G47530
chr5	15858400	15859599	652	91	5.21011e-110	2.76492	1.77576e-109	AT5G39610
chr2	18406400	18407199	523	73	9.74876e-89	2.76474	2.82542e-88	AT2G44590
chr5	16841400	16842399	659	92	4.06608e-111	2.76423	1.39566e-110	AT5G42140
chr4	1412000	1413199	881	123	1.16605e-147	2.76406	5.09634e-147	AT4G03205
chr4	1412000	1413199	881	123	1.16605e-147	2.76406	5.09634e-147	AT4G03200
chr1	2492400	2493199	487	68	9.41557e-83	2.76373	2.58936e-82	AT1G08030
chr1	29557400	29558399	666	93	3.17327e-112	2.76355	1.09786e-111	AT1G78580
chr5	22499200	22500599	1074	150	2.55873e-179	2.76305	1.35066e-178	AT5G55540
chr1	19746200	19748599	1732	242	2.58346e-287	2.7619	2.30922e-286	AT1G53000
chr1	19746200	19748599	1732	242	2.58346e-287	2.7619	2.30922e-286	AT1G53010
chr4	18485000	18487199	1603	224	4.5038e-266	2.7616	3.61757e-265	AT4G39838
chr4	18485000	18487199	1603	224	4.5038e-266	2.7616	3.61757e-265	AT4G39840
chr1	3261200	3261799	415	58	8.85831e-71	2.76119	2.18481e-70	AT1G09980
chr2	15820000	15820599	415	58	8.85831e-71	2.76119	2.18481e-70	AT2G37720
chr1	22499600	22500599	422	59	6.89246e-72	2.76017	1.7172e-71	AT1G61090
chr1	2124000	2129599	3941	551	0	2.76014	0	AT1G06920
chr1	2124000	2129599	3941	551	0	2.76014	0	AT1G06923
chr1	2124000	2129599	3941	551	0	2.76014	0	AT1G06925
chr1	2124000	2129599	3941	551	0	2.76014	0	AT1G06930
chr3	22379800	22380799	665	93	8.79008e-112	2.7594	3.03148e-111	AT3G60550
chr1	5501000	5502399	951	133	9.89086e-159	2.75934	4.65185e-158	AT1G16020
chr1	5501000	5502399	951	133	9.89086e-159	2.75934	4.65185e-158	AT1G16022
chr1	5501000	5502399	951	133	9.89086e-159	2.75934	4.65185e-158	AT1G16025
chr1	5501000	5502399	951	133	9.89086e-159	2.75934	4.65185e-158	AT1G16030
chr5	2080200	2081599	1001	140	6.36373e-167	2.75919	3.1245e-166	AT5G06730
chr4	17885000	17885599	479	67	3.35221e-81	2.7589	9.08976e-81	AT4G38092
chr5	14912800	14914199	1008	141	4.97313e-168	2.75878	2.45975e-167	AT5G37540
chr1	25766000	25767199	822	115	1.78396e-137	2.75835	7.36484e-137	AT1G68620
chr5	4092400	4093599	922	129	7.33939e-154	2.75815	3.32274e-153	AT5G12950
chr4	8875600	8879599	2958	414	0	2.75724	0	AT4G15545
chr4	8875600	8879599	2958	414	0	2.75724	0	AT4G15550
chr3	22824600	22826799	1336	187	1.35008e-221	2.75703	8.80024e-221	AT3G61680
chr3	2174600	2175999	1000	140	1.75862e-166	2.75644	8.61518e-166	AT3G06880
chr3	6664000	6666999	2221	311	0	2.7559	0	AT3G19240
chr3	6664000	6666999	2221	311	0	2.7559	0	AT3G19250
chr1	7823000	7823799	607	85	4.91231e-102	2.75579	1.58265e-101	AT1G22160
chr3	5566400	5568599	1342	188	2.91391e-222	2.75468	1.90365e-221	AT3G16400
chr4	15209800	15212799	1756	246	5.63347e-290	2.75464	5.09292e-289	AT4G31350
chr1	16580200	16580799	414	58	2.45515e-70	2.75454	6.02552e-70	AT1G43810
chr3	3726400	3731199	3668	514	0	2.75386	0	AT3G11800
chr3	3726400	3731199	3668	514	0	2.75386	0	AT3G11810
chr3	3726400	3731199	3668	514	0	2.75386	0	AT3G11820
chr3	2342400	2343599	999	140	4.85513e-166	2.75368	2.3731e-165	AT3G07340
chr4	16381200	16384199	2417	339	0	2.7514	0	AT4G34215
chr4	16381200	16384199	2417	339	0	2.7514	0	AT4G34220
chr4	9353400	9355399	1511	212	2.88678e-249	2.75046	2.13931e-248	AT4G16610
chr5	26710800	26713399	1404	197	8.77224e-232	2.75028	5.99608e-231	AT5G66880
chr5	26710800	26713399	1404	197	8.77224e-232	2.75028	5.99608e-231	AT5G66890
chr3	17629000	17630799	1126	158	2.0728e-186	2.75016	1.12974e-185	AT3G47780
chr3	17629000	17630799	1126	158	2.0728e-186	2.75016	1.12974e-185	AT3G47790
chr2	15031600	15033599	1354	190	1.35349e-223	2.75005	8.90912e-223	AT2G35760
chr2	15031600	15033599	1354	190	1.35349e-223	2.75005	8.90912e-223	AT2G35765
chr2	12902600	12903199	399	56	1.12342e-67	2.74955	2.68973e-67	AT2G30240
chr5	25079000	25080999	1432	201	3.27772e-236	2.74931	2.30738e-235	AT5G62470
chr5	14565400	14566199	356	50	1.41242e-60	2.74762	3.16677e-60	AT5G36925
chr1	19844600	19848199	2463	346	0	2.74704	0	AT1G53210
chr1	19844600	19848199	2463	346	0	2.74704	0	AT1G53220
chr5	15411600	15414799	1943	273	0	2.74654	0	AT5G38490
chr3	6790600	6795599	3302	464	0	2.74622	0	AT3G19553
chr3	6790600	6795599	3302	464	0	2.74622	0	AT3G19560
chr4	18242600	18246799	2718	382	0	2.74576	0	AT4G39170
chr4	18242600	18246799	2718	382	0	2.74576	0	AT4G39180
chr1	3045400	3045599	128	18	3.2563e-23	2.74419	4.48674e-23	AT1G09430
chr1	3045400	3045599	128	18	3.2563e-23	2.74419	4.48674e-23	AT1G09440
chr4	6872400	6873799	903	127	1.91809e-149	2.74385	8.48107e-149	AT4G11300
chr2	14213600	14214799	839	118	4.90901e-139	2.74382	2.04699e-138	AT2G33560
chr1	512200	516999	3063	431	0	2.74249	0	AT1G02470
chr1	512200	516999	3063	431	0	2.74249	0	AT1G02475
chr1	512200	516999	3063	431	0	2.74249	0	AT1G02480
chr1	512200	516999	3063	431	0	2.74249	0	AT1G02490
chr1	29450800	29459799	6076	855	0	2.74238	0	AT1G78265
chr1	29450800	29459799	6076	855	0	2.74238	0	AT1G78270
chr1	29450800	29459799	6076	855	0	2.74238	0	AT1G78280
chr1	29450800	29459799	6076	855	0	2.74238	0	AT1G78290
chr3	947800	949199	938	132	5.55969e-155	2.74224	2.53546e-154	AT3G03770
chr1	16923400	16924599	874	123	1.42097e-144	2.74209	6.12756e-144	AT1G44810
chr1	20266800	20267799	547	77	2.094e-91	2.7414	6.20301e-91	AT1G54280
chr4	11503400	11504599	767	108	4.44136e-127	2.74061	1.71419e-126	AT4G21650
chr5	9318000	9319199	717	101	6.95733e-119	2.73952	2.52638e-118	AT5G26670
chr1	3210400	3211799	951	134	9.30436e-157	2.73875	4.32236e-156	AT1G09880
chr3	22563800	22566599	1717	242	1.02295e-280	2.73798	8.76596e-280	AT3G60980
chr1	541200	543999	1944	274	0	2.73793	0	AT1G02570
chr1	541200	543999	1944	274	0	2.73793	0	AT1G02575
chr5	305000	305799	525	74	1.22057e-87	2.73781	3.5095e-87	AT5G01790
chr5	20800000	20801599	1525	215	1.63013e-249	2.73721	1.20907e-248	AT5G51180
chr5	20800000	20801599	1525	215	1.63013e-249	2.73721	1.20907e-248	AT5G51190
chr3	2869600	2871399	1468	207	3.21098e-240	2.73673	2.29751e-239	AT3G09340
chr3	2869600	2871399	1468	207	3.21098e-240	2.73673	2.29751e-239	AT3G09350
chr1	19214400	19216199	1170	165	5.7675e-192	2.73639	3.23864e-191	AT1G51800
chr5	20616600	20617199	312	44	4.93458e-53	2.73639	1.02295e-52	AT5G50670
chr1	19277600	19278599	567	80	2.71678e-94	2.73507	8.24973e-94	AT1G51890
chr5	6479400	6480399	659	93	3.84783e-109	2.7345	1.30584e-108	AT5G19260
chr1	19778000	19778999	673	95	2.3366e-111	2.7338	8.04246e-111	AT1G53070
chr1	25771400	25772599	864	122	3.76286e-142	2.73294	1.60202e-141	AT1G68640
chr2	19502800	19503599	524	74	3.3517e-87	2.7326	9.58334e-87	AT2G47520
chr3	8309400	8310999	963	136	4.26001e-158	2.73252	1.99924e-157	AT3G23250
chr5	425800	432799	5013	708	0	2.73238	0	AT5G02160
chr5	425800	432799	5013	708	0	2.73238	0	AT5G02170
chr5	425800	432799	5013	708	0	2.73238	0	AT5G02180
chr5	425800	432799	5013	708	0	2.73238	0	AT5G02150
chr1	28148000	28150399	1678	237	1.97149e-273	2.73224	1.63634e-272	AT1G74950
chr5	17910200	17911399	757	107	1.17527e-124	2.73016	4.44745e-124	AT5G44440
chr1	4461400	4465199	2865	405	0	2.72989	0	AT1G13090
chr1	4461400	4465199	2865	405	0	2.72989	0	AT1G13100
chr3	8641600	8644599	2009	284	0	2.72984	0	AT3G23920
chr1	1933000	1934199	863	122	1.03024e-141	2.72978	4.36699e-141	AT1G06340
chr1	8549000	8552399	2581	365	0	2.7288	0	AT1G24150
chr5	5148600	5149399	502	71	1.95127e-83	2.72848	5.40023e-83	AT5G15790
chr5	7383800	7385599	1534	217	1.52688e-249	2.72798	1.13346e-248	AT5G22310
chr3	1579400	1582799	2290	324	0	2.72751	0	AT3G05470
chr3	21233400	21235799	1604	227	1.29493e-260	2.72681	1.01304e-259	AT3G57390
chr5	2962600	2963599	664	94	2.24872e-109	2.72594	7.64336e-109	AT5G09540
chr2	11041600	11042999	1010	143	5.61631e-165	2.7256	2.72681e-164	AT2G25900
chr4	15123400	15123999	346	49	3.79591e-58	2.72493	8.30356e-58	AT4G31100
chr4	15123400	15123999	346	49	3.79591e-58	2.72493	8.30356e-58	AT4G31080
chr1	4819800	4820599	473	67	1.46102e-78	2.72435	3.87486e-78	AT1G14070
chr1	4819800	4820599	473	67	1.46102e-78	2.72435	3.87486e-78	AT1G14071
chr3	2563800	2565999	1666	236	3.8369e-270	2.7242	3.13389e-269	AT3G08030
chr2	12997600	13005599	5427	769	0	2.72339	0	AT2G30500
chr2	12997600	13005599	5427	769	0	2.72339	0	AT2G30505
chr2	12997600	13005599	5427	769	0	2.72339	0	AT2G30520
chr3	8550200	8551399	882	125	3.65108e-144	2.72292	1.56899e-143	AT3G23730
chr5	61800	63599	1030	146	7.2854e-168	2.72245	3.60137e-167	AT5G01180
chr1	752000	754599	1813	257	2.16105e-293	2.72233	1.98039e-292	AT1G03120
chr1	752000	754599	1813	257	2.16105e-293	2.72233	1.98039e-292	AT1G03140
chr1	752000	754599	1813	257	2.16105e-293	2.72233	1.98039e-292	AT1G03130
chr1	3285000	3290799	3901	553	0	2.72224	0	AT1G10060
chr1	3285000	3290799	3901	553	0	2.72224	0	AT1G10070
chr1	3285000	3290799	3901	553	0	2.72224	0	AT1G10090
chr3	20112200	20113199	656	93	7.88831e-108	2.72206	2.65431e-107	AT3G54310
chr2	16114200	16115399	1008	143	4.18119e-164	2.7202	2.0199e-163	AT2G38490
chr1	28728200	28729599	1015	144	3.2625e-165	2.72007	1.58488e-164	AT1G76560
chr1	28728200	28729599	1015	144	3.2625e-165	2.72007	1.58488e-164	AT1G76570
chr4	9497400	9501599	3213	456	0	2.71908	0	AT4G16890
chr1	23567000	23570799	2381	338	0	2.71843	0	AT1G63540
chr1	23567000	23570799	2381	338	0	2.71843	0	AT1G63550
chr2	14743400	14746199	1944	276	0	2.71809	0	AT2G34940
chr2	14743400	14746199	1944	276	0	2.71809	0	AT2G34950
chr2	14743400	14746199	1944	276	0	2.71809	0	AT2G34960
chr3	1554600	1555399	662	94	1.67638e-108	2.71773	5.66926e-108	AT3G05410
chr3	7595600	7597399	1324	188	2.2143e-214	2.71773	1.39333e-213	AT3G21560
chr1	9424400	9429599	3535	502	0	2.71745	0	AT1G27130
chr1	9424400	9429599	3535	502	0	2.71745	0	AT1G27135
chr1	9424400	9429599	3535	502	0	2.71745	0	AT1G27140
chr1	9424400	9429599	3535	502	0	2.71745	0	AT1G27150
chr3	19039800	19040599	563	80	1.52108e-92	2.71578	4.55854e-92	AT3G51290
chr1	12657000	12658199	837	119	3.28664e-136	2.71428	1.34728e-135	AT1G34575
chr5	17939600	17942199	1765	251	3.85465e-284	2.71361	3.40357e-283	AT5G44540
chr5	17939600	17942199	1765	251	3.85465e-284	2.71361	3.40357e-283	AT5G44550
chr5	17939600	17942199	1765	251	3.85465e-284	2.71361	3.40357e-283	AT5G44530
chr4	2778400	2778799	239	34	1.33242e-40	2.71266	2.39819e-40	AT4G05497
chr1	25829000	25830799	963	137	3.74079e-156	2.71257	1.72858e-155	AT1G68760
chr1	25829000	25830799	963	137	3.74079e-156	2.71257	1.72858e-155	AT1G68765
chr1	25829000	25830799	963	137	3.74079e-156	2.71257	1.72858e-155	AT1G68770
chr4	11736400	11737399	738	105	2.92773e-120	2.71233	1.07432e-119	AT4G22170
chr1	22884400	22885199	562	80	4.1425e-92	2.71096	1.23594e-91	AT1G61900
chr1	3217800	3218399	288	41	2.19305e-48	2.71072	4.32407e-48	AT1G09900
chr3	2978800	2979599	576	82	2.50809e-94	2.71072	7.6187e-94	AT3G09710
chr3	1226000	1227599	1215	173	4.95557e-196	2.71023	2.83943e-195	AT3G04550
chr3	1226000	1227599	1215	173	4.95557e-196	2.71023	2.83943e-195	AT3G04560
chr4	6160800	6161999	913	130	5.78957e-148	2.71021	2.53803e-147	AT4G09780
chr3	282400	284399	1292	184	3.25196e-208	2.7097	1.98604e-207	AT3G01780
chr3	282400	284399	1292	184	3.25196e-208	2.7097	1.98604e-207	AT3G01790
chr5	19294800	19295799	667	95	9.67389e-109	2.70943	3.2741e-108	AT5G47580
chr3	19066200	19066799	337	48	3.65948e-56	2.70935	7.86302e-56	AT3G51360
chr3	17536600	17537599	702	100	2.77296e-114	2.70903	9.73665e-114	AT3G47590
chr2	11380400	11381799	877	125	5.45199e-142	2.70748	2.31776e-141	AT2G26710
chr3	6812200	6818799	4574	652	0	2.70723	0	AT3G19610
chr3	6812200	6818799	4574	652	0	2.70723	0	AT3G19615
chr3	6812200	6818799	4574	652	0	2.70723	0	AT3G19630
chr3	6812200	6818799	4574	652	0	2.70723	0	AT3G19620
chr5	338600	340199	933	133	7.4552e-151	2.70711	3.32849e-150	AT5G01880
chr5	338600	340199	933	133	7.4552e-151	2.70711	3.32849e-150	AT5G01881
chr1	5872200	5873599	1031	147	2.30179e-166	2.70656	1.12697e-165	AT1G17180
chr1	18733400	18734199	561	80	1.12617e-91	2.70613	3.3417e-91	AT1G50590
chr1	25239000	25240399	813	116	1.39052e-131	2.70463	5.54109e-131	AT1G67365
chr1	25239000	25240399	813	116	1.39052e-131	2.70463	5.54109e-131	AT1G67370
chr1	19160400	19161599	932	133	2.02163e-150	2.70421	8.99362e-150	AT1G51680
chr4	11391800	11393199	988	141	2.76866e-159	2.70404	1.30497e-158	AT4G21380
chr3	255800	262799	4302	614	0	2.70382	0	AT3G01690
chr3	255800	262799	4302	614	0	2.70382	0	AT3G01700
chr3	255800	262799	4302	614	0	2.70382	0	AT3G01705
chr3	255800	262799	4302	614	0	2.70382	0	AT3G01710
chr3	255800	262799	4302	614	0	2.70382	0	AT3G01720
chr5	23974600	23976999	1758	251	4.15309e-281	2.70285	3.57297e-280	AT5G59450
chr5	23974600	23976999	1758	251	4.15309e-281	2.70285	3.57297e-280	AT5G59460
chr1	22444400	22447399	2114	302	0	2.70131	0	AT1G60950
chr1	22444400	22447399	2114	302	0	2.70131	0	AT1G60960
chr1	26186600	26188199	1120	160	6.71138e-180	2.70131	3.55129e-179	AT1G69610
chr1	28537800	28538799	686	98	3.36498e-111	2.70131	1.15638e-110	AT1G76040
chr2	8985600	8988199	1834	262	7.43584e-293	2.70131	6.7928e-292	AT2G20880
chr2	8985600	8988199	1834	262	7.43584e-293	2.70131	6.7928e-292	AT2G20890
chr3	8473600	8474199	350	50	5.98216e-58	2.70131	1.30663e-57	AT3G23600
chr3	8473600	8474199	350	50	5.98216e-58	2.70131	1.30663e-57	AT3G23590
chr4	7260600	7261199	287	41	5.97724e-48	2.70131	1.17192e-47	AT4G12120
chr5	9189400	9189999	273	39	9.99732e-46	2.70131	1.90816e-45	AT5G26240
chr5	26094800	26095999	665	95	7.12467e-108	2.70131	2.39828e-107	AT5G65300
chr5	25809000	25813599	3267	467	0	2.69966	0	AT5G64560
chr5	25809000	25813599	3267	467	0	2.69966	0	AT5G64570
chr5	25809000	25813599	3267	467	0	2.69966	0	AT5G64572
chr2	17945800	17947399	1616	231	4.24396e-258	2.69964	3.276e-257	AT2G43150
chr5	14995800	14999599	3183	455	0	2.69961	0	AT5G37750
chr5	14995800	14999599	3183	455	0	2.69961	0	AT5G37760
chr5	14995800	14999599	3183	455	0	2.69961	0	AT5G37770
chr1	29967000	29968999	1301	186	2.89056e-208	2.69923	1.76657e-207	AT1G79640
chr2	854800	856599	1287	184	4.74294e-206	2.69921	2.85658e-205	AT2G02950
chr3	22551800	22553399	1070	153	1.03091e-171	2.69879	5.1993e-171	AT3G60966
chr3	22551800	22553399	1070	153	1.03091e-171	2.69879	5.1993e-171	AT3G60961
chr4	13527400	13528799	944	135	9.01232e-152	2.69845	4.03817e-151	AT4G26930
chr1	30127600	30129399	1202	172	2.50485e-192	2.69682	1.40928e-191	AT1G80070
chr1	30127600	30129399	1202	172	2.50485e-192	2.69682	1.40928e-191	AT1G80080
chr2	7499400	7500199	531	76	2.26211e-86	2.69623	6.41951e-86	AT2G17250
chr5	26225000	26228399	2326	333	0	2.69551	0	AT5G65620
chr5	26225000	26228399	2326	333	0	2.69551	0	AT5G65630
[truncated: 9,568 more rows]

## Sheet: EIN6-ZNF DAP-seq
Supplementary File 5: Binding sites of EIN6, EIN6-ZNF and EEN
GEM narrowPeak events
1000 top-ranked peaks of EIN6-ZNF DAP-seq
chromsome	peak start	peak end
chr4	3953453	3953654
chr3	13591908	13592109
chr3	14202232	14202433
chr3	14202548	14202749
chr4	3952884	3953085
chr2	8599	8800
chr3	13591493	13591694
chr3	13590491	13590692
chr5	11185619	11185820
chr5	11186263	11186464
chr2	6292	6493
chr3	14192380	14192581
chr2	3626196	3626397
chr2	3447	3648
chr2	9029	9230
chr2	2747	2948
chr4	3950823	3951024
chr2	5707	5908
chr5	11732168	11732369
chr2	5884	6085
chr2	2349	2550
chr2	3884	4085
chr2	1284	1485
chr2	4463	4664
chr2	5266	5467
chr4	3952660	3952861
chr2	3627219	3627420
chr3	14191836	14192037
chr3	13592173	13592374
chr5	11184970	11185171
chr3	13590671	13590872
chr2	5405	5606
chr2	3621097	3621298
chr4	3954627	3954828
chr3	14193226	14193427
chr4	3054597	3054798
chr2	3622534	3622735
chr4	3952083	3952284
chr2	3625672	3625873
chr2	9929	10130
chr2	3626874	3627075
chr4	3952440	3952641
chr2	5081	5282
chr3	14192909	14193110
chr2	3619405	3619606
chr2	3760	3961
chr2	4606	4807
chr4	3951525	3951726
chr5	11708192	11708393
chr3	13591597	13591798
chr5	11733665	11733866
chr4	3951163	3951364
chr4	3954345	3954546
chr4	3955068	3955269
chr2	3607121	3607322
chr5	11731418	11731619
chr2	3618363	3618564
chr2	1807	2008
chr2	3618936	3619137
chr5	11723604	11723805
chr2	3619872	3620073
chr2	3614949	3615150
chr2	7191048	7191249
chr2	3291	3492
chr2	4328	4529
chr4	3955797	3955998
chr5	11735973	11736174
chr3	13587600	13587801
chr5	11728512	11728713
chr5	11733536	11733737
chr5	11708911	11709112
chr3	13587610	13587811
chr2	9857	10058
chr4	3055149	3055350
chr5	11727704	11727905
chr2	3618016	3618217
chr2	3609	3810
chr2	3625176	3625377
chr2	3624500	3624701
chr2	3616522	3616723
chr2	3621603	3621804
chr4	3966458	3966659
chr4	3060991	3061192
chr2	19698058	19698259
chr1	15082751	15082952
chr5	11734779	11734980
chr2	3623346	3623547
chr2	3615961	3616162
chr5	11730391	11730592
chr5	11727424	11727625
chr4	4009687	4009888
chr5	11727036	11727237
chr5	11729121	11729322
chr4	3986020	3986221
chr1	15084352	15084553
chr5	11735112	11735313
chr4	3972593	3972794
chr2	3617127	3617328
chr4	3984357	3984558
chr4	3970939	3971140
chr5	11187417	11187618
chr1	15083639	15083840
chr5	11705247	11705448
chr4	4007222	4007423
chr2	7190952	7191153
chr1	15082260	15082461
chr2	3605727	3605928
chr1	15084869	15085070
chr5	11726384	11726585
chr5	3253107	3253308
chr5	11188160	11188361
chr2	1414	1615
chr4	3984533	3984734
chr5	11704054	11704255
chr4	3971101	3971302
chr1	15083123	15083324
chr1	15085546	15085747
chr2	3606575	3606776
chr5	11184559	11184760
chr5	11702971	11703172
chr5	11728236	11728437
chr5	11186916	11187117
chr5	11702303	11702504
chr5	11733039	11733240
chr5	11731048	11731249
chr5	11735915	11736116
chr3	13705870	13706071
chr2	3607641	3607842
chr2	3606107	3606308
chr1	15085234	15085435
chr1	15082041	15082242
chr3	13632992	13633193
chr2	10165	10366
chr3	7104252	7104453
chr4	4005628	4005829
chr2	10004	10205
chr5	11726044	11726245
chr4	3987394	3987595
chr4	4010162	4010363
chr4	4006153	4006354
chr5	11703202	11703403
chr3	13709947	13710148
chr4	4000642	4000843
chr5	11724402	11724603
chr4	3965620	3965821
chr5	11706891	11707092
chr2	3398733	3398934
chr3	14212644	14212845
chr3	13814728	13814929
chr3	13816196	13816397
chr4	4011067	4011268
chr2	3498347	3498548
chr2	3623600	3623801
chr3	13751334	13751535
chr3	13706313	13706514
chr3	14180375	14180576
chr3	13708764	13708965
chr5	12881297	12881498
chr3	13598526	13598727
chr3	13589268	13589469
chr5	11701920	11702121
chr3	14223123	14223324
chr3	13592277	13592478
chr5	11723330	11723531
chr3	13590276	13590477
chr5	11707388	11707589
chr5	12886591	12886792
chr5	11724187	11724388
chr5	11188575	11188776
chr4	3967322	3967523
chr5	12885941	12886142
chr3	13705579	13705780
chr2	3319918	3320119
chr2	3459848	3460049
chr2	3377902	3378103
chr4	4003955	4004156
chr2	3482316	3482517
chr2	3283492	3283693
chr3	13706832	13707033
chr2	3342206	3342407
chr5	12886319	12886520
chr4	4008545	4008746
chr4	3055946	3056147
chr4	18252230	18252431
chr1	15700067	15700268
chr5	11710140	11710341
chr5	12885494	12885695
chr3	13853799	13854000
chr3	13709693	13709894
chr2	5199893	5200094
chr1	5598739	5598940
chr2	3460994	3461195
chr2	3381944	3382145
chr2	3248255	3248456
chr2	3358590	3358791
chr4	11099713	11099914
chr3	13712960	13713161
chr4	3969127	3969328
chr2	3629283	3629484
chr5	1354821	1355022
chr4	3982441	3982642
chr4	3977658	3977859
chr5	12877644	12877845
chr2	5203381	5203582
chr2	3337526	3337727
chr2	3377167	3377368
chr5	11765762	11765963
chr2	3460339	3460540
chr2	3718144	3718345
chr1	216262	216463
chr4	16574334	16574535
chr2	16439863	16440064
chr4	3974684	3974885
chr3	13836567	13836768
chr2	3409246	3409447
chr2	3499966	3500167
chr4	4010630	4010831
chr4	5268143	5268344
chr4	3969300	3969501
chr3	14175554	14175755
chr1	30297915	30298116
chr3	14215468	14215669
chr3	13853888	13854089
chr2	3495796	3495997
chr4	3998071	3998272
chr2	3428967	3429168
chr1	15701357	15701558
chr5	15680652	15680853
chr1	26142582	26142783
chr3	14181238	14181439
chr2	3471557	3471758
chr2	18604258	18604459
chr1	3352410	3352611
chr4	3976557	3976758
chr4	3842753	3842954
chr4	4002173	4002374
chr3	14223654	14223855
chr2	3357748	3357949
chr2	3389972	3390173
chr3	22228751	22228952
chr3	14211167	14211368
chr2	9230774	9230975
chr5	11945109	11945310
chr1	24203857	24204058
chr3	13815358	13815559
chr4	10522089	10522290
chr1	21344759	21344960
chr2	3260291	3260492
chr1	29302434	29302635
chr5	15694228	15694429
chr5	12873278	12873479
chr4	17931071	17931272
chr4	4778276	4778477
chr1	27864335	27864536
chr1	25833143	25833344
chr1	10332834	10333035
chr5	20264428	20264629
chr4	413720	413921
chr1	28613537	28613738
chr2	3296051	3296252
chr1	6796748	6796949
chr5	26147350	26147551
chr1	26414248	26414449
chr1	18500766	18500967
chr1	914093	914294
chr2	3458918	3459119
chr2	16840753	16840954
chr4	1046598	1046799
chr1	23886441	23886642
chr1	4140194	4140395
chr1	23354810	23355011
chr5	11730685	11730886
chr3	13736926	13737127
chr5	2138287	2138488
chr5	8533191	8533392
chr5	21817696	21817897
chr1	9260258	9260459
chr2	5203060	5203261
chr1	1685963	1686164
chr4	17147826	17148027
chr4	17530048	17530249
chr5	6457491	6457692
chr5	6298538	6298739
chr5	11704528	11704729
chr5	14743210	14743411
chr3	14214847	14215048
chr1	23575375	23575576
chr4	4011531	4011732
chr3	22394522	22394723
chr4	3849659	3849860
chr5	985017	985218
chr5	427940	428141
chr5	11990815	11991016
chr1	28741408	28741609
chr1	23452693	23452894
chr4	3965772	3965973
chr3	14213815	14214016
chr1	2956995	2957196
chr5	3540510	3540711
chr1	7427501	7427702
chr1	11215423	11215624
chr5	24754341	24754542
chr4	12870636	12870837
chr5	20008425	20008626
chr3	5458280	5458481
chr1	2255396	2255597
chr1	23090534	23090735
chr2	3468338	3468539
chr4	14369371	14369572
chr1	6833100	6833301
chr1	29867375	29867576
chr5	6291169	6291370
chr3	1795869	1796070
chr3	23022035	23022236
chr3	13707364	13707565
chr1	11827722	11827923
chr1	9614783	9614984
chr4	143935	144136
chr4	3059377	3059578
chr5	1589962	1590163
chr2	3383002	3383203
chr1	7108508	7108709
chr3	14190657	14190858
chr1	23410628	23410829
chr1	26597862	26598063
chr2	3443749	3443950
chr2	3292304	3292505
chr5	585780	585981
chr5	18655769	18655970
chr2	5205616	5205817
chr4	2545750	2545951
chr1	9735099	9735300
chr1	1710439	1710640
chr1	10626955	10627156
chr1	28360213	28360414
chr1	2867711	2867912
chr1	2869080	2869281
chr1	18446416	18446617
chr1	8021321	8021522
chr5	20761119	20761320
chr2	19043896	19044097
chr4	13085224	13085425
chr1	19048350	19048551
chr1	29540178	29540379
chr1	29727806	29728007
chr1	30408888	30409089
chr1	18839537	18839738
chr3	7021350	7021551
chr1	17484347	17484548
chr1	12091229	12091430
chr5	17865122	17865323
chr5	25143679	25143880
chr1	1995688	1995889
chr3	14219059	14219260
chr5	1808451	1808652
chr5	25053054	25053255
chr5	22555529	22555730
chr1	27993662	27993863
chr1	7495435	7495636
chr1	4852815	4853016
chr1	29009434	29009635
chr3	13849516	13849717
chr1	435514	435715
chr1	10681022	10681223
chr5	21501792	21501993
chr5	21870399	21870600
chr4	703943	704144
chr4	13819468	13819669
chr2	19290501	19290702
chr1	2329017	2329218
chr5	26530226	26530427
chr4	9651674	9651875
chr4	11941151	11941352
chr3	5110476	5110677
chr1	10174904	10175105
chr4	3850200	3850401
chr1	24829022	24829223
chr2	14282777	14282978
chr5	6836743	6836944
chr4	12682136	12682337
chr5	7616671	7616872
chr5	9152209	9152410
chr5	6515554	6515755
chr3	1581716	1581917
chr1	7200866	7201067
chr1	26259233	26259434
chr1	24147834	24148035
chr1	709444	709645
chr5	12880579	12880780
chr2	3278683	3278884
chr5	2222883	2223084
chr5	15906285	15906486
chr4	14635388	14635589
chr4	2533220	2533421
chr4	12172270	12172471
chr3	1497627	1497828
chr3	22155810	22156011
chr1	20550396	20550597
chr2	242893	243094
chr1	9243156	9243357
chr1	10787501	10787702
chr1	27148878	27149079
chr1	28301369	28301570
chr1	7850730	7850931
chr1	29512487	29512688
chr1	24223802	24224003
chr2	3387353	3387554
chr5	11936498	11936699
chr1	3102318	3102519
chr2	3416712	3416913
chr5	23308083	23308284
chr5	23401568	23401769
chr5	7122277	7122478
chr5	21805139	21805340
chr3	6889970	6890171
chr3	13710366	13710567
chr3	283557	283758
chr1	23798473	23798674
chr1	22825068	22825269
chr1	7512699	7512900
chr4	2394192	2394393
chr4	14042968	14043169
chr4	10974778	10974979
chr1	18543555	18543756
chr1	19958908	19959109
chr1	29121542	29121743
chr1	6499432	6499633
chr1	30324949	30325150
chr1	7050714	7050915
chr3	13721131	13721332
chr3	22780397	22780598
chr2	7676356	7676557
chr5	6903493	6903694
chr1	5522207	5522408
chr4	4001115	4001316
chr1	24557743	24557944
chr5	12875740	12875941
chr1	9806555	9806756
chr1	4459124	4459325
chr1	10337384	10337585
chr3	13723153	13723354
chr1	2949966	2950167
chr4	8531101	8531302
chr4	12489508	12489709
chr4	15508015	15508216
chr5	25742836	25743037
chr2	3359035	3359236
chr3	14218275	14218476
chr1	4520544	4520745
chr1	18884308	18884509
chr1	28458749	28458950
chr1	3086719	3086920
chr1	24528978	24529179
chr3	13754931	13755132
chr3	14173230	14173431
chr3	1579827	1580028
chr3	13750559	13750760
chr3	4878453	4878654
chr2	15718655	15718856
chr2	9443574	9443775
chr1	9525920	9526121
chr4	419388	419589
chr4	1406884	1407085
chr4	12144246	12144447
chr4	1475224	1475425
chr4	17493232	17493433
chr5	17668979	17669180
chr5	21428442	21428643
chr5	23400935	23401136
chr1	5953390	5953591
chr4	3060427	3060628
chr2	3323532	3323733
chr1	3508668	3508869
chr1	3027847	3028048
chr1	7853481	7853682
chr1	15700762	15700963
chr1	20587143	20587344
chr1	3814377	3814578
chr1	4073470	4073671
chr3	13751456	13751657
chr2	15068659	15068860
chr4	7266602	7266803
chr4	13876013	13876214
chr4	14847211	14847412
chr4	16694554	16694755
chr4	18571693	18571894
chr5	1990243	1990444
chr5	25551823	25552024
chr5	5908417	5908618
chr5	4829317	4829518
chr2	3363476	3363677
chr5	11941962	11942163
chr5	16398984	16399185
chr4	16822207	16822408
chr3	14221754	14221955
chr1	11475368	11475569
chr3	22914411	22914612
chr1	26487059	26487260
chr1	27720527	27720728
chr1	6387327	6387528
chr4	350144	350345
chr4	16745606	16745807
chr4	18458377	18458578
chr4	1306957	1307158
chr4	2511089	2511290
chr4	10786988	10787189
chr5	102441	102642
chr5	1290305	1290506
chr5	16814353	16814554
chr5	22548010	22548211
chr2	3384417	3384618
chr3	3109696	3109897
chr3	15910458	15910659
chr2	6823580	6823781
chr2	8948782	8948983
chr2	18991189	18991390
chr1	29844274	29844475
chr1	28236622	28236823
chr1	8414401	8414602
chr1	22500172	22500373
chr1	28170943	28171144
chr4	13750941	13751142
chr4	14772133	14772334
chr5	8706932	8707133
chr5	21795333	21795534
chr5	24759528	24759729
chr5	272792	272993
chr5	10315512	10315713
chr1	21521524	21521725
chr5	16692829	16693030
chr4	14484088	14484289
chr2	9386707	9386908
chr1	7338436	7338637
chr1	7253758	7253959
chr1	19775875	19776076
chr5	17176562	17176763
chr5	26913804	26914005
chr5	20168673	20168874
chr5	15950055	15950256
chr5	1536326	1536527
chr3	8588711	8588912
chr3	19265523	19265724
chr3	23354196	23354397
chr3	7105598	7105799
chr3	6845435	6845636
chr2	5204502	5204703
chr5	19947931	19948132
chr1	4850450	4850651
chr1	11595742	11595943
chr1	19522080	19522281
chr1	24000884	24001085
chr1	20783242	20783443
chr1	29374106	29374307
chr1	975590	975791
chr1	22115955	22116156
chr1	29715705	29715906
chr4	18249383	18249584
chr4	1483911	1484112
chr4	1478355	1478556
chr4	11174208	11174409
chr2	3508764	3508965
chr1	7930069	7930270
chr5	3010338	3010539
chr5	9975186	9975387
chr5	19532962	19533163
chr5	23305581	23305782
chr5	1522296	1522497
chr3	13713272	13713473
chr3	20340563	20340764
chr1	20609645	20609846
chr1	4624355	4624556
chr1	1675342	1675543
chr1	21558566	21558767
chr1	2551747	2551948
chr1	23368294	23368495
chr5	12881880	12882081
chr4	1251051	1251252
chr4	2243968	2244169
chr4	6491305	6491506
chr4	2499653	2499854
chr4	14964064	14964265
chr5	1702971	1703172
chr5	17940277	17940478
chr5	21283200	21283401
chr5	23842507	23842708
chr5	441402	441603
chr5	23420925	23421126
chr3	13750954	13751155
chr3	305969	306170
chr3	17482100	17482301
chr5	12871295	12871496
chr2	3277072	3277273
chr1	27197930	27198131
chr1	5597889	5598090
chr1	17476411	17476612
chr1	1416236	1416437
chr1	2632147	2632348
chr2	3294342	3294543
chr5	8622116	8622317
chr5	9648785	9648986
chr5	18111028	18111229
chr5	19301222	19301423
chr5	23760522	23760723
chr5	21242602	21242803
chr5	23754092	23754293
chr5	2018871	2019072
chr2	12474076	12474277
chr2	7256172	7256373
chr3	8945817	8946018
chr1	23778624	23778825
chr1	3803585	3803786
chr4	13496417	13496618
chr4	701790	701991
chr1	6521274	6521475
chr1	10559792	10559993
chr1	26187153	26187354
chr1	27996055	27996256
chr1	30218913	30219114
chr1	9428119	9428320
chr1	24974289	24974490
chr1	5731495	5731696
chr1	23683645	23683846
chr1	27886296	27886497
chr5	20831980	20832181
chr5	6021927	6022128
chr5	25331751	25331952
chr2	18835225	18835426
chr5	16698141	16698342
chr5	14774008	14774209
chr5	463743	463944
chr5	20947067	20947268
chr5	3385719	3385920
chr5	23312485	23312686
chr5	2180061	2180262
chr3	10435626	10435827
chr3	19272039	19272240
chr3	21894520	21894721
chr3	17253450	17253651
chr3	22556295	22556496
chr5	19258186	19258387
chr4	14150371	14150572
chr4	10184271	10184472
chr4	7963107	7963308
chr4	13781059	13781260
chr1	558211	558412
chr1	17618773	17618974
chr1	17721026	17721227
chr1	20327618	20327819
chr1	20912798	20912999
chr1	22798624	22798825
chr1	24572783	24572984
chr1	28314250	28314451
chr1	8836049	8836250
chr1	22552620	22552821
chr1	20706735	20706936
chr1	26696057	26696258
chr1	19859442	19859643
chr1	4739975	4740176
chr1	3025770	3025971
chr1	222477	222678
chr1	25042998	25043199
chr1	28377850	28378051
chr1	17375056	17375257
chr2	1704662	1704863
chr1	1459486	1459687
chr3	7168461	7168662
chr3	11088323	11088524
chr3	16770872	16771073
chr3	21801655	21801856
chr1	19985226	19985427
chr5	21568775	21568976
chr5	24071104	24071305
chr5	6624360	6624561
chr5	18277912	18278113
chr5	3550785	3550986
chr5	24047462	24047663
chr5	22547860	22548061
chr1	3683141	3683342
chr4	16746803	16747004
chr1	30274349	30274550
chr1	911194	911395
chr1	3089643	3089844
chr1	4285448	4285649
chr1	4759477	4759678
chr1	7200194	7200395
chr1	8579652	8579853
chr1	10538194	10538395
chr1	11313723	11313924
chr1	27157475	27157676
chr1	27447113	27447314
chr1	28382186	28382387
chr1	29709701	29709902
chr1	27430720	27430921
chr1	10344254	10344455
chr2	18696231	18696432
chr3	21102749	21102950
chr5	2993336	2993537
chr5	21772045	21772246
chr5	23311058	23311259
chr5	592262	592463
chr5	17628303	17628504
chr5	26431173	26431374
chr5	24954770	24954971
chr5	23923789	23923990
chr5	20993959	20994160
chr5	8317160	8317361
chr5	3415393	3415594
chr5	2997111	2997312
chr1	8684855	8685056
chr1	23649090	23649291
chr1	2289063	2289264
chr1	9450931	9451132
chr4	374090	374291
chr4	12852716	12852917
chr4	15316742	15316943
chr4	12153788	12153989
chr3	4915204	4915405
chr3	22510504	22510705
chr3	13800991	13801192
chr1	1797835	1798036
chr1	29214189	29214390
chr1	9285746	9285947
chr1	17150856	17151057
chr1	28180104	28180305
chr5	20822233	20822434
chr2	3430659	3430860
chr5	4633283	4633484
chr5	26581163	26581364
chr5	990022	990223
chr5	24501006	24501207
chr5	23342577	23342778
chr5	17455548	17455749
chr5	6029279	6029480
chr5	21080428	21080629
chr5	26540722	26540923
chr5	21360796	21360997
chr5	23366224	23366425
chr1	18474721	18474922
chr1	11538683	11538884
chr4	447190	447391
chr1	22912489	22912690
chr2	14081069	14081270
chr4	16218365	16218566
chr4	13733247	13733448
chr4	13901258	13901459
chr4	17300242	17300443
chr4	16969317	16969518
chr3	9302843	9303044
chr1	2120393	2120594
chr1	4801315	4801516
chr1	17099543	17099744
chr1	8380789	8380990
chr1	10372792	10372993
chr1	6399823	6400024
chr1	18625839	18626040
chr1	16416939	16417140
chr1	27430493	27430694
chr1	29277668	29277869
chr1	27689079	27689280
chr1	8827537	8827738
chr3	566940	567141
chr1	6316813	6317014
chr5	5965322	5965523
chr1	27791741	27791942
chr1	18828677	18828878
chr5	2685436	2685637
chr5	7840257	7840458
chr5	21911040	21911241
chr5	514195	514396
chr1	18937935	18938136
chr5	6426011	6426212
chr1	11965877	11966078
chr4	6992540	6992741
chr4	13491854	13492055
chr4	18554583	18554784
chr4	9834415	9834616
chr3	237760	237961
chr3	10310949	10311150
chr3	22496980	22497181
chr3	22211950	22212151
chr3	19037396	19037597
chr1	5604	5805
chr5	2089622	2089823
chr1	3938643	3938844
chr4	9096894	9097095
chr5	11773347	11773548
chr1	2620828	2621029
chr1	3475910	3476111
chr1	11161759	11161960
chr1	19863130	19863331
chr1	26540426	26540627
chr1	28672082	28672283
chr1	21906135	21906336
chr1	29392574	29392775
chr1	7194583	7194784
chr1	22998697	22998898
chr1	6060937	6061138
chr1	18778612	18778813
chr5	23233776	23233977
chr5	1206894	1207095
chr5	16959840	16960041
chr5	18097167	18097368
chr5	21301767	21301968
chr5	21505277	21505478
chr5	22157825	22158026
chr5	22447621	22447822
chr5	24065917	24066118
chr5	22665676	22665877
chr5	18600806	18601007
chr5	5578342	5578543
chr5	21241547	21241748
chr5	15270866	15271067
chr5	22520680	22520881
chr2	3341222	3341423
chr5	23478015	23478216
chr2	6819128	6819329
chr2	7942046	7942247
chr2	8087624	8087825
chr2	19601174	19601375
chr2	18883929	18884130
chr3	2134442	2134643
chr3	5337891	5338092
chr3	7583895	7584096
chr3	13850533	13850734
chr3	6900946	6901147
chr3	20785242	20785443
chr4	6893034	6893235
chr4	8084430	8084631
chr4	18238237	18238438
chr4	18291189	18291390
chr4	16448127	16448328
chr4	14131527	14131728
chr4	10875800	10876001
chr5	6329630	6329831
chr1	17179246	17179447
chr1	7641764	7641965
chr1	429325	429526
chr1	635253	635454
chr1	8029501	8029702
chr1	8337817	8338018
chr1	9878987	9879188
chr1	12375021	12375222
chr1	18407870	18408071
chr1	29680842	29681043
chr1	30373793	30373994
chr1	5046029	5046230
chr1	3491893	3492094
chr1	9356641	9356842
chr1	13219324	13219525
chr1	2492825	2493026
chr5	18284888	18285089
chr5	810801	811002
chr5	12616189	12616390
chr5	12887242	12887443
chr5	17527029	17527230
chr5	21429032	21429233
chr5	22802422	22802623
chr5	25570766	25570967
chr5	26879456	26879657
chr5	3307255	3307456
chr5	6285936	6286137
chr5	2867259	2867460
chr5	18725394	18725595
chr5	26779260	26779461
chr1	21888280	21888481
chr1	29076619	29076820
chr5	21320103	21320304
chr2	13173513	13173714
chr2	14013456	14013657
chr3	908052	908253
chr3	2304097	2304298
chr3	13798532	13798733
chr3	22459657	22459858
chr3	22502123	22502324
chr1	27722486	27722687
chr4	8762819	8763020
chr4	15274532	15274733
chr4	16714587	16714788
chr4	18075192	18075393
chr4	11499950	11500151
chr4	3851826	3852027
chr4	13653978	13654179
chr4	2545600	2545801
chr4	11749739	11749940
chr4	17726053	17726254
chr4	7281367	7281568
chr4	18325033	18325234
chr4	14840286	14840487
chr5	12876564	12876765
chr1	3164831	3165032
chr1	28684879	28685080
chr1	4385250	4385451
chr1	5032720	5032921
chr1	8885390	8885591
chr1	11092676	11092877
chr1	12347376	12347577
chr1	15267119	15267320
chr1	18021434	18021635
chr1	18465364	18465565
chr1	19320026	19320227
chr1	19730059	19730260
chr1	23563503	23563704
chr1	25230309	25230510
chr1	28928323	28928524
chr1	27326728	27326929
chr1	22485149	22485350
chr1	24834063	24834264
chr1	12044347	12044548
chr1	17366423	17366624
chr1	541549	541750
chr1	25813704	25813905
chr1	12974381	12974582
chr1	28371889	28372090
chr1	3126201	3126402
chr5	1619052	1619253
chr5	6687252	6687453
chr5	21420172	21420373
chr5	8634752	8634953
chr5	23302630	23302831
chr5	7935176	7935377
chr5	22685567	22685768
chr1	26038406	26038607
chr1	28819907	28820108
chr5	24671531	24671732
chr1	26531917	26532118
chr1	21522754	21522955
chr2	3948347	3948548
chr2	3965535	3965736
chr1	25012825	25013026
chr1	8426036	8426237
chr3	7907687	7907888
chr3	17224101	17224302
chr3	21582415	21582616
chr3	3951736	3951937
chr4	2728402	2728603
chr4	8123369	8123570
chr4	10944996	10945197
chr4	17151080	17151281
chr4	12128536	12128737
chr4	349388	349589
chr4	9699197	9699398
chr1	25442612	25442813
chr1	22247338	22247539
chr1	21888096	21888297
chr5	20616870	20617071
chr1	2257997	2258198
chr1	3761002	3761203
chr1	3900389	3900590
chr1	8223492	8223693
chr1	11376827	11377028
chr1	19668515	19668716
chr1	27011662	27011863
chr1	3485993	3486194
chr1	24609968	24610169
chr1	8202824	8203025
chr1	1716793	1716994
chr1	26191013	26191214
chr1	21024344	21024545
chr1	9945983	9946184
chr1	9318190	9318391
chr1	7557071	7557272
chr1	9978959	9979160
chr5	222985	223186
chr5	3433886	3434087
chr5	5469787	5469988
chr5	6684233	6684434
chr5	14744311	14744512
chr5	22133171	22133372
chr5	23307347	23307548
chr5	25152055	25152256
chr5	21192251	21192452
chr5	22086204	22086405
chr5	6515312	6515513
chr5	4171307	4171508
chr5	2513163	2513364
chr5	1504068	1504269
chr1	28715186	28715387
chr2	16935112	16935313
chr1	18679696	18679897
chr1	11533119	11533320
chr3	6752555	6752756
chr3	20042646	20042847
chr3	23425418	23425619
chr3	8377435	8377636
chr3	2528352	2528553
chr3	7508074	7508275
chr3	4511175	4511376
chr5	11832065	11832266
chr1	3849578	3849779
chr1	299496	299697
chr4	6122465	6122666
chr4	14867397	14867598
chr4	14109293	14109494
chr4	6245736	6245937
chr4	15600129	15600330
chr4	16224845	16225046
chr4	15910798	15910999
chr5	1390897	1391098
chr1	25143536	25143737
chr2	3366471	3366672

## Sheet: EEN ChIP-seq
Supplementary File 5: Binding sites of EIN6, EIN6-ZNF and EEN
SICER (EEN ChIP vs IgG)
EEN binding sites
Chromosome	domain start	domain end	ChIP_island_read_count	CONTROL_island_read_count	p-value	fold change	FDR threshold	gene name
chr3	15952000	15953199	1145	103	0	10.3252	0	AT3G44260
chr4	12686200	12688999	2762	262	0	9.79155	0	AT4G24565
chr4	12686200	12688999	2762	262	0	9.79155	0	AT4G24570
chr4	12686200	12688999	2762	262	0	9.79155	0	AT4G24580
chr4	14579600	14582999	2876	277	0	9.64357	0	AT4G29780
chr4	14579600	14582999	2876	277	0	9.64357	0	AT4G29790
chr2	16699400	16702199	2945	285	0	9.59775	0	AT2G39990
chr2	16699400	16702199	2945	285	0	9.59775	0	AT2G40000
chr2	15192400	15194399	1730	180	0	8.92694	0	AT2G36220
chr2	15192400	15194399	1730	180	0	8.92694	0	AT2G36230
chr1	9647200	9649199	1833	192	0	8.86727	0	AT1G27720
chr1	9647200	9649199	1833	192	0	8.86727	0	AT1G27730
chr2	10753600	10755399	1417	152	0	8.65875	0	AT2G25250
chr1	6831800	6834599	2146	241	0	8.27069	0	AT1G19770
chr1	6831800	6834599	2146	241	0	8.27069	0	AT1G19780
chr4	5740000	5741599	1390	160	0	8.06907	0	AT4G08950
chr5	13900200	13902999	1832	217	0	7.84142	0	AT5G35735
chr1	2189800	2190799	766	91	0	7.81837	0	AT1G07135
chr1	29364000	29366399	1621	196	0	7.68167	0	AT1G78080
chr1	28766600	28767599	731	89	0	7.6288	0	AT1G76650
chr1	9407000	9408799	1048	129	0	7.54572	0	AT1G27100
chr1	29804000	29809999	4474	553	0	7.51449	0	AT1G79240
chr1	2927600	2929799	1847	235	0	7.30008	0	AT1G09070
chr1	2927600	2929799	1847	235	0	7.30008	0	AT1G09080
chr3	17907400	17911999	2895	373	0	7.20889	0	AT3G48350
chr3	17907400	17911999	2895	373	0	7.20889	0	AT3G48360
chr5	20011400	20016799	3087	416	0	6.89243	0	AT5G49360
chr4	6863800	6866599	1726	242	0	6.62452	0	AT4G11280
chr1	12851600	12853399	1227	174	0	6.54974	0	AT1G35140
chr1	22034000	22040599	4077	581	0	6.51769	0	AT1G59870
chr2	8911400	8913799	1241	178	0	6.47561	0	AT2G20670
chr3	17974600	17976999	1537	223	0	6.40174	0	AT3G48515
chr3	17974600	17976999	1537	223	0	6.40174	0	AT3G48520
chr4	522400	524399	1185	172	0	6.3991	0	AT4G01250
chr3	20549200	20553999	2320	345	0	6.24594	0	AT3G55430
chr3	20549200	20553999	2320	345	0	6.24594	0	AT3G55440
chr5	24102600	24104199	798	120	0	6.17661	0	AT5G59820
chr1	14158400	14162199	2287	344	0	6.17499	0	AT1G37130
chr5	25332800	25337199	2016	305	0	6.13931	0	AT5G63160
chr1	30240800	30244999	2231	343	0	6.04135	0	AT1G80440
chr1	30240800	30244999	2231	343	0	6.04135	0	AT1G80450
chr3	21059000	21061199	1229	191	0	5.97651	0	AT3G56880
chr4	7756400	7761599	2428	381	0	5.91906	0	AT4G13340
chr3	20774000	20779599	2860	458	0	5.80002	0	AT3G55980
chr3	4078200	4079799	862	141	0	5.67828	0	AT3G12830
chr2	7754400	7757999	2097	345	0	5.64558	0	AT2G17830
chr2	7754400	7757999	2097	345	0	5.64558	0	AT2G17840
chr2	19557600	19559999	1512	249	0	5.64003	0	AT2G47730
chr2	19557600	19559999	1512	249	0	5.64003	0	AT2G47740
chr1	24647200	24648799	777	129	4.09256e-307	5.59449	1.05118e-305	AT1G66180
chr4	2716800	2720599	2195	366	0	5.57035	0	AT4G05330
chr4	2716800	2720599	2195	366	0	5.57035	0	AT4G05320
chr2	16108400	16110999	1351	226	0	5.55234	0	AT2G38470
chr2	16108400	16110999	1351	226	0	5.55234	0	AT2G38480
chr2	12813400	12817799	2040	343	0	5.52414	0	AT2G30020
chr3	9721200	9723799	1367	231	0	5.49649	0	AT3G26520
chr5	1215800	1217599	751	128	6.50673e-290	5.44953	1.58395e-288	AT5G04340
chr4	2587400	2589599	1217	208	0	5.43446	0	AT4G05050
chr4	7785000	7786199	479	82	3.14102e-185	5.42563	4.97379e-184	AT4G13390
chr4	7785000	7786199	479	82	3.14102e-185	5.42563	4.97379e-184	AT4G13395
chr4	9752600	9753999	675	116	6.72956e-259	5.40474	1.45376e-257	AT4G17490
chr5	5718600	5720599	892	154	0	5.37989	0	AT5G17350
chr5	5718600	5720599	892	154	0	5.37989	0	AT5G17360
chr2	15081000	15084799	1717	298	0	5.35159	0	AT2G35930
chr3	19568000	19570999	1188	207	0	5.33059	0	AT3G52800
chr3	19568000	19570999	1188	207	0	5.33059	0	AT3G52810
chr1	8910000	8912599	1081	191	0	5.2568	0	AT1G25400
chr5	6831600	6837999	3687	652	0	5.25236	0	AT5G20250
chr5	6831600	6837999	3687	652	0	5.25236	0	AT5G20260
chr4	16451800	16454799	1815	323	0	5.21919	0	AT4G34410
chr4	16451800	16454799	1815	323	0	5.21919	0	AT4G34412
chr4	16451800	16454799	1815	323	0	5.21919	0	AT4G34415
chr2	13554000	13557399	1667	298	0	5.19575	0	AT2G31880
chr2	13554000	13557399	1667	298	0	5.19575	0	AT2G31890
chr5	26602800	26604399	680	123	1.63273e-248	5.13491	3.37086e-247	AT5G66650
chr1	30260600	30260999	110	20	2.94379e-42	5.10848	1.20788e-41	AT1G80480
chr1	30260600	30260999	110	20	2.94379e-42	5.10848	1.20788e-41	AT1G80490
chr4	17048600	17050799	1160	212	0	5.08219	0	AT4G36040
chr1	6462600	6466999	1886	346	0	5.06284	0	AT1G18740
chr1	6462600	6466999	1886	346	0	5.06284	0	AT1G18745
chr1	6462600	6466999	1886	346	0	5.06284	0	AT1G18750
chr1	6626600	6628199	692	130	1.04454e-243	4.94415	2.14295e-242	AT1G19210
chr1	6626600	6628199	692	130	1.04454e-243	4.94415	2.14295e-242	AT1G19220
chr1	27308200	27313199	2227	419	0	4.93668	0	AT1G72530
chr1	27308200	27313199	2227	419	0	4.93668	0	AT1G72520
chr3	5121200	5127199	2406	454	0	4.92231	0	AT3G15210
chr3	5121200	5127199	2406	454	0	4.92231	0	AT3G15220
chr1	28745800	28748199	1138	216	0	4.89347	0	AT1G76600
chr5	8300200	8300799	203	39	7.25985e-72	4.8346	5.06018e-71	AT5G24340
chr1	267600	271799	1879	361	0	4.83447	0	AT1G01710
chr1	267600	271799	1879	361	0	4.83447	0	AT1G01720
chr1	267600	271799	1879	361	0	4.83447	0	AT1G01725
chr1	267600	271799	1879	361	0	4.83447	0	AT1G01730
chr1	28143800	28146799	1207	234	0	4.79093	0	AT1G74929
chr1	28143800	28146799	1207	234	0	4.79093	0	AT1G74930
chr1	28143800	28146799	1207	234	0	4.79093	0	AT1G74940
chr4	15487800	15494599	2587	502	0	4.78654	0	AT4G32020
chr4	15487800	15494599	2587	502	0	4.78654	0	AT4G32030
chr4	15487800	15494599	2587	502	0	4.78654	0	AT4G32040
chr1	28586200	28587999	829	162	4.38363e-280	4.75301	1.02874e-278	AT1G76170
chr1	28586200	28587999	829	162	4.38363e-280	4.75301	1.02874e-278	AT1G76180
chr4	13809600	13814599	1938	379	0	4.74945	0	AT4G27652
chr4	13809600	13814599	1938	379	0	4.74945	0	AT4G27657
chr4	13809600	13814599	1938	379	0	4.74945	0	AT4G27654
chr1	29636600	29638599	915	180	9.6152e-307	4.72147	2.45037e-305	AT1G78830
chr1	30383600	30388399	2080	410	0	4.71203	0	AT1G80840
chr1	30383600	30388399	2080	410	0	4.71203	0	AT1G80850
chr1	30383600	30388399	2080	410	0	4.71203	0	AT1G80860
chr3	507400	511799	2138	422	0	4.7057	0	AT3G02468
chr3	507400	511799	2138	422	0	4.7057	0	AT3G02470
chr3	507400	511799	2138	422	0	4.7057	0	AT3G02460
chr5	6470000	6472999	1256	248	0	4.70399	0	AT5G19240
chr5	6470000	6472999	1256	248	0	4.70399	0	AT5G19250
chr1	27643800	27647199	1443	285	0	4.70273	0	AT1G73530
chr1	27643800	27647199	1443	285	0	4.70273	0	AT1G73540
chr5	16814800	16819199	1700	336	0	4.69936	0	AT5G42050
chr5	16814800	16819199	1700	336	0	4.69936	0	AT5G42053
chr5	16814800	16819199	1700	336	0	4.69936	0	AT5G42060
chr5	16814800	16819199	1700	336	0	4.69936	0	AT5G42070
chr2	14219000	14222199	1380	273	0	4.6951	0	AT2G33570
chr2	14219000	14222199	1380	273	0	4.6951	0	AT2G33580
chr3	17438000	17441399	1604	319	0	4.67028	0	AT3G47340
chr2	17111000	17115399	1779	354	0	4.66769	0	AT2G41000
chr2	17111000	17115399	1779	354	0	4.66769	0	AT2G41010
chr2	17111000	17115399	1779	354	0	4.66769	0	AT2G41997
chr2	13658800	13661599	1072	214	0	4.65275	0	AT2G32150
chr3	4309600	4313599	1527	307	0	4.61987	0	AT3G13310
chr3	4309600	4313599	1527	307	0	4.61987	0	AT3G13300
chr2	11683400	11684999	528	107	7.20882e-173	4.58331	1.05924e-171	AT2G27310
chr2	13824200	13824799	142	29	4.66918e-48	4.54799	2.16964e-47	AT2G32560
chr4	13749000	13751999	1209	248	0	4.52797	0	AT4G27510
chr4	13749000	13751999	1209	248	0	4.52797	0	AT4G27520
chr1	7835200	7837799	1159	238	0	4.52309	0	AT1G22190
chr1	7835200	7837799	1159	238	0	4.52309	0	AT1G22200
chr1	27639000	27640599	718	148	6.70347e-230	4.506	1.29389e-228	AT1G73500
chr2	16771600	16774799	1452	300	0	4.49546	0	AT2G40140
chr4	13663200	13664599	531	110	7.17193e-170	4.48364	1.03061e-168	AT4G27270
chr4	13663200	13664599	531	110	7.17193e-170	4.48364	1.03061e-168	AT4G27280
chr5	14750200	14753399	1439	300	0	4.45521	0	AT5G37250
chr5	14750200	14753399	1439	300	0	4.45521	0	AT5G37260
chr1	3776600	3782399	2426	507	0	4.44439	0	AT1G11260
chr1	3776600	3782399	2426	507	0	4.44439	0	AT1G11270
chr3	22141800	22145199	1286	269	0	4.44035	0	AT3G59940
chr3	22141800	22145199	1286	269	0	4.44035	0	AT3G59950
chr5	3524200	3527599	1338	280	0	4.43841	0	AT5G11090
chr3	9307400	9307799	128	27	3.72696e-42	4.40327	1.52348e-41	AT3G25600
chr4	14818400	14821799	1121	237	0	4.39325	0	AT4G30260
chr4	14818400	14821799	1121	237	0	4.39325	0	AT4G30270
chr1	23689800	23690599	269	57	2.40521e-85	4.38335	1.99638e-84	AT1G63840
chr5	24063400	24066399	1115	238	0	4.35138	0	AT5G59730
chr5	24063400	24066399	1115	238	0	4.35138	0	AT5G59732
chr5	6414200	6416399	876	187	1.59285e-269	4.35102	3.65906e-268	AT5G19120
chr5	6414200	6416399	876	187	1.59285e-269	4.35102	3.65906e-268	AT5G19130
chr2	18253600	18257999	1784	381	0	4.34909	0	AT2G44130
chr2	18253600	18257999	1784	381	0	4.34909	0	AT2G44140
chr2	10829800	10831599	771	165	6.47293e-237	4.3401	1.27968e-235	AT2G25450
chr4	11172200	11175399	1182	253	0	4.33936	0	AT4G20870
chr4	11172200	11175399	1182	253	0	4.33936	0	AT4G20860
chr3	20295400	20299599	1615	348	0	4.31045	0	AT3G54810
chr1	7238600	7239599	291	63	5.23862e-90	4.29024	4.60603e-89	AT1G20823
chr1	8384600	8386799	679	147	2.3098e-206	4.29024	3.98655e-205	AT1G23710
chr3	5692600	5694999	756	164	6.21417e-229	4.28161	1.19239e-227	AT3G16720
chr1	23890400	23891999	575	125	2.14727e-174	4.27255	3.18381e-173	AT1G64380
chr3	12447400	12451399	1763	389	0	4.20951	0	AT3G30770
chr3	12447400	12451399	1763	389	0	4.20951	0	AT3G30775
chr5	24217600	24218199	163	36	1.81813e-50	4.20546	8.77331e-50	AT5G60142
chr5	24217600	24218199	163	36	1.81813e-50	4.20546	8.77331e-50	AT5G60150
chr5	3513000	3517199	1279	283	0	4.19772	0	AT5G11060
chr5	3513000	3517199	1279	283	0	4.19772	0	AT5G11070
chr5	8773400	8778399	1993	443	0	4.17862	0	AT5G25280
chr5	1928400	1931999	1338	298	0	4.17031	0	AT5G06310
chr5	1928400	1931999	1338	298	0	4.17031	0	AT5G06320
chr5	25697600	25706599	2959	663	0	4.14534	0	AT5G64250
chr5	25697600	25706599	2959	663	0	4.14534	0	AT5G64260
chr5	19180000	19181199	461	104	1.06197e-134	4.11715	1.27359e-133	AT5G47230
chr1	11798200	11801199	1154	261	0	4.10671	0	AT1G32630
chr1	11798200	11801199	1154	261	0	4.10671	0	AT1G32640
chr1	21440400	21443799	1364	309	0	4.10001	0	AT1G57980
chr1	21440400	21443799	1364	309	0	4.10001	0	AT1G57990
chr5	19397200	19401799	1874	425	0	4.09552	0	AT5G47910
chr3	19440600	19442799	844	192	5.73281e-242	4.08291	1.16878e-240	AT3G52450
chr5	25518200	25524199	2046	466	0	4.07801	0	AT5G63770
chr5	25518200	25524199	2046	466	0	4.07801	0	AT5G63780
chr3	23324200	23324799	136	31	4.31697e-41	4.0748	1.73423e-40	AT3G63120
chr3	23324200	23324799	136	31	4.31697e-41	4.0748	1.73423e-40	AT3G63130
chr1	7104400	7106199	657	151	8.97368e-187	4.04126	1.44912e-185	AT1G20510
chr1	7104400	7106199	657	151	8.97368e-187	4.04126	1.44912e-185	AT1G20515
chr1	10420400	10420799	100	23	1.46349e-30	4.03832	4.23218e-30	AT1G29750
chr1	27982000	27985199	1139	262	0	4.03786	0	AT1G74448
chr1	27982000	27985199	1139	262	0	4.03786	0	AT1G74453
chr1	27982000	27985199	1139	262	0	4.03786	0	AT1G74456
chr1	27982000	27985199	1139	262	0	4.03786	0	AT1G74450
chr5	20070800	20071599	399	92	4.39495e-114	4.02823	4.70044e-113	AT5G49480
chr5	25525000	25528399	1422	329	0	4.01451	0	AT5G63790
chr5	25525000	25528399	1422	329	0	4.01451	0	AT5G63780
chr1	22866000	22871199	1896	441	0	3.99327	0	AT1G61870
chr1	22866000	22871199	1896	441	0	3.99327	0	AT1G61880
chr1	22866000	22871199	1896	441	0	3.99327	0	AT1G61890
chr2	17137000	17142599	1986	466	0	3.95842	0	AT2G41100
chr2	17137000	17142599	1986	466	0	3.95842	0	AT2G41110
chr2	17137000	17142599	1986	466	0	3.95842	0	AT2G41120
chr1	25877400	25882599	1747	411	0	3.94803	0	AT1G68840
chr1	25877400	25882599	1747	411	0	3.94803	0	AT1G68845
chr1	9671000	9675999	1962	463	0	3.93593	0	AT1G27760
chr1	9671000	9675999	1962	463	0	3.93593	0	AT1G27770
chr3	6704200	6704799	148	35	1.05676e-42	3.92756	4.39689e-42	AT3G19340
chr1	20728000	20728399	109	26	8.76357e-32	3.89388	2.64938e-31	AT1G55525
chr1	20728000	20728399	109	26	8.76357e-32	3.89388	2.64938e-31	AT1G55520
chr3	18437600	18442399	1696	405	0	3.88955	0	AT3G49710
chr3	18437600	18442399	1696	405	0	3.88955	0	AT3G49720
chr3	18437600	18442399	1696	405	0	3.88955	0	AT3G49725
chr3	7194800	7195599	255	61	8.45026e-71	3.88275	5.77877e-70	AT3G20600
chr3	618200	619999	620	149	2.07138e-167	3.86486	2.95059e-166	AT3G02840
chr3	618200	619999	620	149	2.07138e-167	3.86486	2.95059e-166	AT3G02850
chr4	16352000	16358199	2020	488	0	3.84468	0	AT4G34150
chr4	16352000	16358199	2020	488	0	3.84468	0	AT4G34160
chr4	16352000	16358199	2020	488	0	3.84468	0	AT4G34140
chr1	12180600	12182399	695	168	5.08514e-186	3.84242	8.17129e-185	AT1G33600
chr5	23056200	23057799	647	157	1.45657e-172	3.82766	2.13064e-171	AT5G56980
chr3	5210600	5216599	2152	524	0	3.81452	0	AT3G15440
chr3	5210600	5216599	2152	524	0	3.81452	0	AT3G15450
chr3	5210600	5216599	2152	524	0	3.81452	0	AT3G15460
chr3	5210600	5216599	2152	524	0	3.81452	0	AT3G15470
chr3	5210600	5216599	2152	524	0	3.81452	0	AT3G15430
chr1	6298800	6302599	1374	335	0	3.80952	0	AT1G18300
chr1	6298800	6302599	1374	335	0	3.80952	0	AT1G18310
chr1	18807800	18812599	1676	409	0	3.80609	0	AT1G50750
chr1	18807800	18812599	1676	409	0	3.80609	0	AT1G50740
chr5	22603200	22603599	102	25	5.4384e-29	3.78956	1.47834e-28	AT5G55850
chr2	19100000	19101399	285	70	2.14814e-76	3.7816	1.59982e-75	AT2G46520
chr5	26903600	26907199	1100	272	8.98535e-285	3.75623	2.15516e-283	AT5G67420
chr1	3995000	3995399	97	24	2.17882e-27	3.75396	5.59192e-27	AT1G11840
chr5	18368600	18371199	917	227	1.50975e-237	3.75208	3.00294e-236	AT5G45340
chr5	1601000	1604399	1300	322	0	3.74987	0	AT5G05410
chr5	1601000	1604399	1300	322	0	3.74987	0	AT5G05420
chr2	7767000	7767999	331	82	2.15809e-87	3.74924	1.83325e-86	AT2G17880
chr5	16441600	16444999	996	247	3.39021e-257	3.74534	7.27557e-256	AT5G41080
chr5	23995400	24001999	2042	512	0	3.70437	0	AT5G59530
chr5	23995400	24001999	2042	512	0	3.70437	0	AT5G59540
chr5	23995400	24001999	2042	512	0	3.70437	0	AT5G59550
chr5	23995400	24001999	2042	512	0	3.70437	0	AT5G59560
chr5	289800	291799	566	142	2.8777e-145	3.70218	3.6384e-144	AT5G01750
chr5	289800	291799	566	142	2.8777e-145	3.70218	3.6384e-144	AT5G01760
chr3	17177600	17183399	1844	463	0	3.69921	0	AT3G46620
chr3	17177600	17183399	1844	463	0	3.69921	0	AT3G46630
chr3	17177600	17183399	1844	463	0	3.69921	0	AT3G46640
chr1	6265600	6268799	950	239	4.14485e-241	3.69194	8.39784e-240	AT1G18200
chr1	6265600	6268799	950	239	4.14485e-241	3.69194	8.39784e-240	AT1G18210
chr1	24636200	24639399	1060	268	4.9575e-267	3.67367	1.13086e-265	AT1G66160
chr1	24636200	24639399	1060	268	4.9575e-267	3.67367	1.13086e-265	AT1G66170
chr2	2269200	2272599	1350	343	0	3.65568	0	AT2G05920
chr4	9759000	9760399	412	105	2.03314e-104	3.64449	1.99762e-103	AT4G17500
chr5	6825600	6827999	879	225	1.7395e-218	3.62857	3.16997e-217	AT5G20220
chr5	6825600	6827999	879	225	1.7395e-218	3.62857	3.16997e-217	AT5G20225
chr5	6825600	6827999	879	225	1.7395e-218	3.62857	3.16997e-217	AT5G20230
chr1	206600	207199	125	32	3.08423e-33	3.62818	9.72993e-33	AT1G01570
chr2	17267600	17271199	1229	317	2.10625e-301	3.60099	5.32603e-300	AT2G41420
chr2	17267600	17271199	1229	317	2.10625e-301	3.60099	5.32603e-300	AT2G41430
chr2	17267600	17271199	1229	317	2.10625e-301	3.60099	5.32603e-300	AT2G41440
chr5	8889400	8889999	182	47	8.76703e-47	3.59668	3.94456e-46	AT5G25520
chr5	8889400	8889999	182	47	8.76703e-47	3.59668	3.94456e-46	AT5G25530
chr5	20371600	20371999	116	30	1.22385e-30	3.59142	3.55178e-30	AT5G50100
chr1	787000	788999	777	201	7.0797e-191	3.59049	1.1605e-189	AT1G03220
chr3	4907800	4908199	112	29	1.2739e-29	3.58714	3.5608e-29	AT3G14590
chr3	6803000	6805599	814	211	2.58445e-199	3.5832	4.32332e-198	AT3G19580
chr4	14534800	14537399	871	226	8.36512e-213	3.57963	1.46704e-211	AT4G29660
chr4	14534800	14537399	871	226	8.36512e-213	3.57963	1.46704e-211	AT4G29670
chr5	23306200	23311799	2162	561	0	3.57949	0	AT5G57550
chr5	23306200	23311799	2162	561	0	3.57949	0	AT5G57560
chr5	23306200	23311799	2162	561	0	3.57949	0	AT5G57565
chr1	8060600	8061199	127	33	3.96319e-33	3.57453	1.24307e-32	AT1G22767
chr4	16560200	16563399	1046	272	2.79136e-254	3.57184	5.87447e-253	AT4G34710
chr1	26322600	26325199	753	196	1.32323e-183	3.56835	2.07519e-182	AT1G69880
chr1	26322600	26325199	753	196	1.32323e-183	3.56835	2.07519e-182	AT1G69890
chr1	8308600	8310599	786	205	4.89371e-191	3.56121	8.06226e-190	AT1G23390
chr5	25037400	25039199	558	146	7.44615e-136	3.54985	9.06318e-135	AT5G62350
chr3	7278800	7282799	1107	290	2.20865e-266	3.54551	4.93467e-265	AT3G20820
chr4	18052800	18055599	700	184	9.96635e-169	3.53353	1.42589e-167	AT4G38620
chr1	3180200	3180799	140	37	1.59308e-35	3.51443	5.42445e-35	AT1G09800
chr3	22650000	22651599	479	127	5.10761e-115	3.50317	5.49869e-114	AT3G61190
chr2	12820600	12823599	874	234	5.49799e-205	3.46916	9.43919e-204	AT2G30040
chr2	11146800	11150799	1340	359	0	3.46688	0	AT2G26190
chr4	14246000	14246399	97	26	6.64652e-25	3.46519	1.52361e-24	AT4G28860
chr1	1477600	1479999	656	176	4.06507e-154	3.46194	5.47945e-153	AT1G05136
chr1	22053600	22057799	1340	361	3.31811545291e-310	3.44768	0	AT1G59910
chr1	22053600	22057799	1340	361	3.31811545291e-310	3.44768	0	AT1G59900
chr5	2150400	2151199	222	60	2.36889e-53	3.43661	1.20363e-52	AT5G06940
chr5	2150400	2151199	222	60	2.36889e-53	3.43661	1.20363e-52	AT5G06950
chr1	21758600	21759399	244	66	2.48793e-58	3.4338	1.38729e-57	AT1G58602
chr5	4262200	4262799	133	36	7.18083e-33	3.43145	2.24152e-32	AT5G13300
chr1	571200	575599	1396	378	0	3.43022	0	AT1G02660
chr1	6061800	6063399	517	141	2.06621e-119	3.40565	2.30033e-118	AT1G17620
chr3	8404400	8405199	176	48	2.6097e-42	3.40565	1.0735e-41	AT3G23440
chr3	5296000	5299199	886	242	2.66504e-202	3.40053	4.50433e-201	AT3G15620
chr3	5296000	5299199	886	242	2.66504e-202	3.40053	4.50433e-201	AT3G15630
chr3	5296000	5299199	886	242	2.66504e-202	3.40053	4.50433e-201	AT3G15640
chr1	5976800	5981599	1529	418	0	3.3975	0	AT1G17420
chr3	8641400	8644599	1020	280	6.57944e-231	3.38354	1.27751e-229	AT3G23920
chr1	26415000	26415599	142	39	2.72944e-34	3.38184	8.90788e-34	AT1G70140
chr4	7180000	7180599	142	39	2.72944e-34	3.38184	8.90788e-34	AT4G11970
chr1	21237800	21242199	1314	361	2.52687e-296	3.38078	6.24444e-295	AT1G56660
chr1	21237800	21242199	1314	361	2.52687e-296	3.38078	6.24444e-295	AT1G56670
chr1	12177400	12179399	654	180	1.64173e-148	3.37469	2.14212e-147	AT1G33590
chr4	18432600	18433999	236	65	3.51062e-55	3.37231	1.83814e-54	AT4G39730
chr2	10832400	10835799	1063	293	3.41485e-239	3.36973	6.83389e-238	AT2G25460
chr2	296200	298199	643	178	6.42249e-145	3.35521	8.08886e-144	AT2G01670
chr1	11115000	11115999	314	87	5.13545e-72	3.35227	3.58711e-71	AT1G31130
chr3	1477200	1479799	727	202	1.12414e-162	3.34281	1.55379e-161	AT3G05200
chr3	1477200	1479799	727	202	1.12414e-162	3.34281	1.55379e-161	AT3G05210
chr2	11282200	11284999	722	201	3.78469e-161	3.33634	5.18725e-160	AT2G26530
chr3	3923200	3923799	154	43	3.3487e-36	3.32645	1.17583e-35	AT3G12320
chr1	24901600	24904599	784	219	6.04326e-174	3.32507	8.91997e-173	AT1G66760
chr3	8960200	8963999	1209	338	1.96823e-266	3.3223	4.42784e-265	AT3G24560
chr3	8960200	8963999	1209	338	1.96823e-266	3.3223	4.42784e-265	AT3G24550
chr1	11927200	11933199	1632	457	0	3.3169	0	AT1G32920
chr1	11927200	11933199	1632	457	0	3.3169	0	AT1G32928
chr1	11927200	11933199	1632	457	0	3.3169	0	AT1G32930
chr5	21138800	21140799	867	243	3.48133e-191	3.31392	5.76452e-190	AT5G52050
chr3	3186000	3188399	819	230	2.92254e-180	3.30739	4.51816e-179	AT3G10300
chr5	8416200	8419199	1009	284	9.52114e-221	3.29991	1.75469e-219	AT5G24590
chr5	24764000	24767999	1081	305	1.64049e-235	3.29196	3.22365e-234	AT5G61580
chr5	24764000	24767999	1081	305	1.64049e-235	3.29196	3.22365e-234	AT5G61590
chr5	24764000	24767999	1081	305	1.64049e-235	3.29196	3.22365e-234	AT5G61600
chr1	2187400	2188799	347	98	2.72693e-77	3.28876	2.04489e-76	AT1G07128
chr1	2187400	2188799	347	98	2.72693e-77	3.28876	2.04489e-76	AT1G07130
chr2	428400	429199	145	41	1.155e-33	3.28483	3.69011e-33	AT2G01930
chr5	9800	16399	2051	580	0	3.28448	0	AT5G01030
chr5	9800	16399	2051	580	0	3.28448	0	AT5G01040
chr1	3663800	3664999	311	88	2.35221e-69	3.28251	1.5659e-68	AT1G10950
chr1	3663800	3664999	311	88	2.35221e-69	3.28251	1.5659e-68	AT1G10960
chr1	10715400	10719599	1387	393	1.33178e-299	3.27803	3.34174e-298	AT1G30360
chr1	10715400	10719599	1387	393	1.33178e-299	3.27803	3.34174e-298	AT1G30370
chr2	17330600	17331599	215	61	1.55436e-48	3.27369	7.29545e-48	AT2G41550
chr1	4525400	4526399	271	77	2.04617e-60	3.26894	1.19189e-59	AT1G13245
chr5	5360600	5360999	95	27	1.05353e-22	3.26805	2.19311e-22	AT5G16380
chr5	5360600	5360999	95	27	1.05353e-22	3.26805	2.19311e-22	AT5G16390
chr2	9562400	9564799	657	187	1.82097e-142	3.26327	2.26718e-141	AT2G22500
chr2	11566200	11569799	1238	354	2.61414e-264	3.24823	5.8009e-263	AT2G27090
chr2	11566200	11569799	1238	354	2.61414e-264	3.24823	5.8009e-263	AT2G27080
chr1	7696400	7698199	552	158	3.48042e-119	3.24497	3.84852e-118	AT1G21910
chr5	18505600	18506199	192	55	4.83962e-43	3.24241	2.02395e-42	AT5G45630
chr1	9956200	9956999	202	58	5.15323e-45	3.23484	2.25031e-44	AT1G28370
chr1	20704800	20707399	772	222	1.52454e-164	3.22993	2.14356e-163	AT1G55450
chr4	17539800	17543199	983	283	1.97001e-208	3.22623	3.41817e-207	AT4G37260
chr4	17539800	17543199	983	283	1.97001e-208	3.22623	3.41817e-207	AT4G37270
chr1	24811200	24812799	566	163	4.23673e-121	3.22521	4.78208e-120	AT1G66500
chr1	6802600	6803399	166	48	4.58526e-37	3.21215	1.65822e-36	AT1G19660
chr4	13015000	13016599	484	140	2.70756e-103	3.21104	2.64433e-102	AT4G25470
chr3	20895800	20898199	711	206	3.75811e-150	3.20576	4.94312e-149	AT3G56360
chr1	7346200	7346999	213	62	1.87141e-46	3.19093	8.39688e-46	AT1G21010
chr1	1028000	1029399	371	109	4.80726e-78	3.16138	3.62993e-77	AT1G04000
chr3	7103600	7104599	864	254	3.9844e-178	3.15943	6.10193e-177	AT3G20362
chr3	7103600	7104599	864	254	3.9844e-178	3.15943	6.10193e-177	AT3G20365
chr3	19138600	19139599	272	80	8.4895e-58	3.15797	4.67783e-57	AT3G51600
chr3	19138600	19139599	272	80	8.4895e-58	3.15797	4.67783e-57	AT3G51610
chr5	5355000	5359199	1054	310	1.49787e-216	3.15797	2.69948e-215	AT5G16350
chr5	5355000	5359199	1054	310	1.49787e-216	3.15797	2.69948e-215	AT5G16360
chr5	5355000	5359199	1054	310	1.49787e-216	3.15797	2.69948e-215	AT5G16375
chr5	5355000	5359199	1054	310	1.49787e-216	3.15797	2.69948e-215	AT5G16370
chr3	3441600	3444399	832	245	3.23001e-171	3.15418	4.6828e-170	AT3G10985
chr3	3441600	3444399	832	245	3.23001e-171	3.15418	4.6828e-170	AT3G10986
chr1	20100400	20103999	1046	309	1.45134e-213	3.14414	2.55907e-212	AT1G53830
chr1	20100400	20103999	1046	309	1.45134e-213	3.14414	2.55907e-212	AT1G53850
chr1	20100400	20103999	1046	309	1.45134e-213	3.14414	2.55907e-212	AT1G53840
chr3	18361200	18365199	1234	365	5.48494e-251	3.14016	1.13961e-249	AT3G49530
chr5	17730000	17731799	453	134	8.20895e-94	3.13995	7.47978e-93	AT5G44060
chr5	2533200	2533799	125	37	1.32301e-27	3.13789	3.42784e-27	AT5G07940
chr2	11750400	11755199	996	295	1.02767e-202	3.13593	1.74598e-201	AT2G27500
chr3	1431400	1431999	135	40	1.37573e-29	3.13475	3.84214e-29	AT3G05120
chr2	14573200	14574199	317	94	3.54537e-66	3.13228	2.25879e-65	AT2G34600
chr2	9924800	9926599	428	127	2.22054e-88	3.13018	1.89618e-87	AT2G23320
chr2	9924800	9926599	428	127	2.22054e-88	3.13018	1.89618e-87	AT2G23321
chr1	21169800	21172599	818	243	2.98294e-166	3.12663	4.23059e-165	AT1G56510
chr4	8010600	8012799	414	123	2.03291e-85	3.12625	1.69167e-84	AT4G13820
chr4	8010600	8012799	414	123	2.03291e-85	3.12625	1.69167e-84	AT4G13830
chr2	17262000	17262799	232	69	6.92905e-49	3.12297	3.26626e-48	AT2G41410
chr1	290800	291599	161	48	1.54184e-34	3.1154	5.09057e-34	AT1G01790
chr1	8981600	8984199	734	219	1.65715e-148	3.11301	2.15363e-147	AT1G25560
chr3	9867400	9867999	174	52	5.17264e-37	3.10796	1.86857e-36	AT3G26810
chr5	22777200	22777799	127	38	1.34336e-27	3.10419	3.47781e-27	AT5G56260
chr5	7245200	7253399	2224	669	0	3.08772	0	AT5G21930
chr5	7245200	7253399	2224	669	0	3.08772	0	AT5G21940
chr3	6562800	6565999	817	246	8.49702e-163	3.08472	1.17946e-161	AT3G19030
chr3	6562800	6565999	817	246	8.49702e-163	3.08472	1.17946e-161	AT3G19035
chr2	7898000	7899399	395	119	5.48387e-80	3.08304	4.23895e-79	AT2G18160
chr2	7898000	7899399	395	119	5.48387e-80	3.08304	4.23895e-79	AT2G18162
chr1	24602200	24602799	209	63	1.91573e-43	3.0813	8.06339e-43	AT1G66090
chr1	5390000	5391399	388	117	1.65321e-78	3.08017	1.25414e-77	AT1G15670
chr5	22894400	22897999	805	243	7.5725e-160	3.07694	1.03353e-158	AT5G56550
chr5	23620600	23624599	1108	335	1.79856e-218	3.07202	3.25939e-217	AT5G58420
chr5	23620600	23624599	1108	335	1.79856e-218	3.07202	3.25939e-217	AT5G58430
chr5	23620600	23624599	1108	335	1.79856e-218	3.07202	3.25939e-217	AT5G58440
chr1	23541400	23542399	165	50	1.54117e-34	3.06509	5.09352e-34	AT1G63480
chr4	5792000	5793199	330	100	1.13981e-66	3.06509	7.31903e-66	AT4G09030
chr5	8284400	8285399	188	57	5.38916e-39	3.06346	2.04889e-38	AT5G24320
chr3	18465600	18470199	1131	343	6.16698e-222	3.06265	1.14299e-220	AT3G49780
chr3	18465600	18470199	1131	343	6.16698e-222	3.06265	1.14299e-220	AT3G49790
chr2	10975200	10976399	313	95	3.24022e-63	3.0602	1.96461e-62	AT2G25735
chr5	24386000	24389599	948	288	5.49087e-186	3.05735	8.78001e-185	AT5G60680
chr2	9739400	9742599	765	233	4.96688e-150	3.04954	6.50681e-149	AT2G22870
chr2	9739400	9742599	765	233	4.96688e-150	3.04954	6.50681e-149	AT2G22880
chr2	9739400	9742599	765	233	4.96688e-150	3.04954	6.50681e-149	AT2G22890
chr3	8267200	8268799	371	113	4.37981e-74	3.04947	3.12624e-73	AT3G23170
chr3	9708600	9712799	1168	356	2.14906e-227	3.04735	4.05216e-226	AT3G26500
chr3	9708600	9712799	1168	356	2.14906e-227	3.04735	4.05216e-226	AT3G26510
chr4	16852000	16852999	223	68	1.96363e-45	3.04596	8.62096e-45	AT4G35480
chr4	17279600	17285399	1469	450	4.01118e-283	3.03206	9.5507e-282	AT4G36648
chr4	17279600	17285399	1469	450	4.01118e-283	3.03206	9.5507e-282	AT4G36650
chr2	15515200	15516999	519	159	9.66921e-102	3.03179	9.35934e-101	AT2G36950
chr3	6663000	6667999	1563	481	5.71391e-299	3.01816	1.42281e-297	AT3G19230
chr3	6663000	6667999	1563	481	5.71391e-299	3.01816	1.42281e-297	AT3G19235
chr3	6663000	6667999	1563	481	5.71391e-299	3.01816	1.42281e-297	AT3G19240
chr3	6663000	6667999	1563	481	5.71391e-299	3.01816	1.42281e-297	AT3G19250
chr1	4540600	4543799	747	230	3.39093e-144	3.01663	4.23802e-143	AT1G13260
chr5	9684000	9685599	412	127	1.502e-80	3.01316	1.18061e-79	AT5G27420
chr3	19371000	19371799	188	58	4.95574e-38	3.01064	1.8475e-37	AT3G52220
chr3	19371000	19371799	188	58	4.95574e-38	3.01064	1.8475e-37	AT3G52230
chr1	28776000	28780399	1183	365	4.52699e-226	3.01038	8.48681e-225	AT1G76680
chr1	28776000	28780399	1183	365	4.52699e-226	3.01038	8.48681e-225	AT1G76690
chr5	26051600	26053399	382	118	1.23807e-74	3.00684	8.97464e-74	AT5G65205
chr5	26051600	26053399	382	118	1.23807e-74	3.00684	8.97464e-74	AT5G65207
chr4	8972400	8974799	550	170	3.06755e-106	3.00499	3.06005e-105	AT4G15760
chr3	1526200	1527199	194	60	4.99009e-39	3.00317	1.89938e-38	AT3G05350
chr2	11041800	11042999	336	104	9.49148e-66	3.00078	6.00023e-65	AT2G25900
chr4	13380200	13380799	187	58	1.50379e-37	2.99463	5.51163e-37	AT4G26488
chr4	13380200	13380799	187	58	1.50379e-37	2.99463	5.51163e-37	AT4G26490
chr1	30302200	30304199	551	171	8.84537e-106	2.99285	8.79683e-105	AT1G80610
chr3	19425600	19427599	554	172	2.81416e-106	2.99165	2.81589e-105	AT3G52400
chr4	15024200	15024599	103	32	1.16791e-21	2.98962	2.32726e-21	AT4G30860
chr1	25656800	25659599	624	194	3.96463e-119	2.98753	4.36913e-118	AT1G68440
chr4	16939200	16947199	2125	661	0	2.98598	0	AT4G35740
chr4	16939200	16947199	2125	661	0	2.98598	0	AT4G35760
chr4	16939200	16947199	2125	661	0	2.98598	0	AT4G35770
chr4	16939200	16947199	2125	661	0	2.98598	0	AT4G35780
chr4	16939200	16947199	2125	661	0	2.98598	0	AT4G35750
chr1	21167200	21168399	331	103	2.70775e-64	2.98483	1.66654e-63	AT1G56500
chr1	21167200	21168399	331	103	2.70775e-64	2.98483	1.66654e-63	AT1G56510
chr3	18514400	18516999	568	177	2.74293e-108	2.9806	2.78737e-107	AT3G49940
chr5	22961800	22962599	186	58	4.53915e-37	2.97861	1.64336e-36	AT5G56760
chr2	10846800	10850799	1074	335	4.22047e-202	2.97775	7.09648e-201	AT2G25490
chr4	7787000	7787799	176	55	4.31077e-35	2.97221	1.44075e-34	AT4G13400
chr4	807200	810799	1087	340	1.21893e-203	2.96947	2.08175e-202	AT4G01865
chr4	807200	810799	1087	340	1.21893e-203	2.96947	2.08175e-202	AT4G01870
chr4	807200	810799	1087	340	1.21893e-203	2.96947	2.08175e-202	AT4G01880
chr4	807200	810799	1087	340	1.21893e-203	2.96947	2.08175e-202	AT4G01860
chr3	16896000	16898199	632	198	3.21499e-119	2.9647	3.56711e-118	AT3G45970
chr3	16896000	16898199	632	198	3.21499e-119	2.9647	3.56711e-118	AT3G45980
chr1	30215800	30220599	1200	377	5.27717e-223	2.95644	9.83665e-222	AT1G80370
chr1	30215800	30220599	1200	377	5.27717e-223	2.95644	9.83665e-222	AT1G80380
chr2	12148400	12149199	210	66	4.55464e-41	2.95532	1.82746e-40	AT2G28400
chr3	5347800	5349399	353	111	2.47475e-67	2.9538	1.59854e-66	AT3G15810
chr1	182200	183599	219	69	1.43955e-42	2.94798	5.96295e-42	AT1G01490
chr1	930800	931999	219	69	1.43955e-42	2.94798	5.96295e-42	AT1G03730
chr2	13185400	13186199	146	46	3.71588e-29	2.94798	1.01773e-28	AT2G30980
chr4	1046000	1047999	476	150	1.26512e-89	2.94744	1.10343e-88	AT4G02380
chr2	14861200	14862199	285	90	1.7466e-54	2.94125	9.05787e-54	AT2G35290
chr3	10045200	10045999	247	78	1.52992e-47	2.94125	7.02902e-47	AT3G27210
chr2	6917000	6920199	877	277	2.33091e-162	2.94069	3.20819e-161	AT2G15880
chr3	3354600	3357999	929	294	2.64539e-171	2.93493	3.85235e-170	AT3G10720
chr3	1047200	1047799	120	38	3.42569e-24	2.9331	7.58629e-24	AT3G04040
chr1	21887800	21888799	281	89	1.63325e-53	2.93255	8.32449e-53	AT1G59590
chr3	5252200	5254799	584	185	1.69209e-108	2.93204	1.72488e-107	AT3G15520
chr3	5252200	5254799	584	185	1.69209e-108	2.93204	1.72488e-107	AT3G15530
chr1	29387600	29389199	416	132	8.08162e-78	2.92717	6.08828e-77	AT1G78100
chr5	4074000	4074599	132	42	3.34853e-26	2.91913	8.15143e-26	AT5G12900
chr1	29898000	29899599	515	164	3.30793e-95	2.9167	3.06547e-94	AT1G79480
chr2	2033600	2034599	273	87	1.41818e-51	2.91456	6.94608e-51	AT2G05540
chr1	7083600	7085799	593	189	4.2988e-109	2.91422	4.42356e-108	AT1G20430
chr1	7083600	7085799	593	189	4.2988e-109	2.91422	4.42356e-108	AT1G20440
chr2	9840600	9842999	607	194	3.99091e-111	2.90614	4.18597e-110	AT2G23110
chr2	9840600	9842999	607	194	3.99091e-111	2.90614	4.18597e-110	AT2G23118
chr2	9840600	9842999	607	194	3.99091e-111	2.90614	4.18597e-110	AT2G23120
chr5	24713200	24713799	125	40	1.00273e-24	2.90254	2.27938e-24	AT5G61455
chr4	841400	846799	1596	511	5.07513e-287	2.90095	1.2263e-285	AT4G01935
chr4	841400	846799	1596	511	5.07513e-287	2.90095	1.2263e-285	AT4G01940
chr4	841400	846799	1596	511	5.07513e-287	2.90095	1.2263e-285	AT4G01950
chr1	6213400	6213999	128	41	3.14841e-25	2.89971	7.3201e-25	AT1G18060
chr1	6213400	6213999	128	41	3.14841e-25	2.89971	7.3201e-25	AT1G18070
chr3	21261200	21263599	608	195	1.06996e-110	2.896	1.11508e-109	AT3G57450
chr3	21261200	21263599	608	195	1.06996e-110	2.896	1.11508e-109	AT3G57460
chr1	2759400	2760399	224	72	3.40302e-42	2.88964	1.3928e-41	AT1G08660
chr1	2759400	2760399	224	72	3.40302e-42	2.88964	1.3928e-41	AT1G08670
chr1	7570600	7571799	252	81	3.59076e-47	2.88964	1.63134e-46	AT1G21600
chr3	87400	89399	494	159	6.38244e-90	2.88575	5.59664e-89	AT3G01280
chr3	87400	89399	494	159	6.38244e-90	2.88575	5.59664e-89	AT3G01290
chr2	12834800	12835399	124	40	2.94557e-24	2.87932	6.54526e-24	AT2G30070
chr4	17669200	17674999	1550	500	1.57545e-275	2.87932	3.6708e-274	AT4G37608
chr4	17669200	17674999	1550	500	1.57545e-275	2.87932	3.6708e-274	AT4G37610
chr5	2354000	2359199	1214	392	4.66758e-216	2.87648	8.36574e-215	AT5G07430
chr5	2354000	2359199	1214	392	4.66758e-216	2.87648	8.36574e-215	AT5G07440
chr5	2354000	2359199	1214	392	4.66758e-216	2.87648	8.36574e-215	AT5G07450
chr1	11749800	11750199	96	31	2.98243e-19	2.87633	5.28446e-19	AT1G32500
chr2	106600	109799	867	280	4.98474e-155	2.87601	6.7751e-154	AT2G01180
chr3	5351200	5352599	260	84	3.2685e-48	2.8749	1.52312e-47	AT3G15820
chr5	771600	774599	730	236	9.85096e-131	2.87303	1.16007e-129	AT5G03240
chr5	771600	774599	730	236	9.85096e-131	2.87303	1.16007e-129	AT5G03250
chr1	5773200	5773799	133	43	9.08717e-26	2.87284	2.15581e-25	AT1G16870
chr1	5773200	5773799	133	43	9.08717e-26	2.87284	2.15581e-25	AT1G16880
chr5	14998000	14999799	528	171	5.2775e-95	2.86792	4.86305e-94	AT5G37760
chr5	14998000	14999799	528	171	5.2775e-95	2.86792	4.86305e-94	AT5G37770
chr1	5171000	5172599	423	137	1.31526e-76	2.8678	9.81781e-76	AT1G15010
chr1	5171000	5172599	423	137	1.31526e-76	2.8678	9.81781e-76	AT1G15015
chr3	22602800	22607999	1293	419	1.24195e-228	2.86625	2.36915e-227	AT3G61060
chr3	22602800	22607999	1293	419	1.24195e-228	2.86625	2.36915e-227	AT3G61070
chr3	22602800	22607999	1293	419	1.24195e-228	2.86625	2.36915e-227	AT3G61080
chr4	298800	300999	515	167	1.52482e-92	2.86431	1.38166e-91	AT4G00730
chr1	21042800	21044999	595	193	1.79998e-106	2.86344	1.80662e-105	AT1G56220
chr5	7524200	7525999	446	145	3.73168e-80	2.8569	2.90519e-79	AT5G22630
chr1	7265200	7266199	255	83	8.64562e-47	2.85359	3.89531e-46	AT1G20880
chr1	7265200	7266199	255	83	8.64562e-47	2.85359	3.89531e-46	AT1G20890
chr5	25718200	25723399	1464	477	2.96961e-256	2.8507	6.33129e-255	AT5G64300
chr5	25718200	25723399	1464	477	2.96961e-256	2.8507	6.33129e-255	AT5G64310
chr5	25718200	25723399	1464	477	2.96961e-256	2.8507	6.33129e-255	AT5G64320
chr2	10135000	10137599	727	237	1.73663e-128	2.84915	2.03042e-127	AT2G23810
chr3	2408400	2409599	230	75	2.57627e-42	2.84836	1.06108e-41	AT3G07550
chr5	21607000	21607599	138	45	2.5941e-26	2.84836	6.36238e-26	AT5G53270
chr5	21607000	21607599	138	45	2.5941e-26	2.84836	6.36238e-26	AT5G53280
chr4	14880000	14883399	877	286	2.28425e-154	2.84815	3.09179e-153	AT4G30430
chr4	14880000	14883399	877	286	2.28425e-154	2.84815	3.09179e-153	AT4G30440
chr1	24127600	24129199	521	170	1.1311e-92	2.84654	1.02776e-91	AT1G64950
chr4	747600	748199	144	47	2.55025e-27	2.84573	6.53489e-27	AT4G01720
chr5	9648400	9648999	147	48	7.99793e-28	2.84449	2.09048e-27	AT5G27350
chr3	21288200	21293199	1491	487	6.88999e-260	2.84366	1.49834e-258	AT3G57520
chr1	20430200	20433199	617	202	1.07722e-108	2.83702	1.10153e-107	AT1G54740
chr2	13002600	13006999	1132	371	6.92855e-197	2.83401	1.15311e-195	AT2G30520
chr5	973400	974599	256	84	2.23365e-46	2.83067	9.99473e-46	AT5G03720
chr5	973400	974599	256	84	2.23365e-46	2.83067	9.99473e-46	AT5G03730
chr3	1592600	1595599	788	259	3.1651e-137	2.82589	3.88141e-136	AT3G05500
chr3	1592600	1595599	788	259	3.1651e-137	2.82589	3.88141e-136	AT3G05510
chr3	5504600	5507599	675	222	8.43295e-118	2.8241	9.26205e-117	AT3G16240
chr3	5504600	5507599	675	222	8.43295e-118	2.8241	9.26205e-117	AT3G16250
chr2	17885800	17886799	176	58	2.11956e-32	2.81847	6.53496e-32	AT2G43010
chr1	2436800	2440399	1064	351	2.89013e-183	2.81555	4.51082e-182	AT1G07885
chr1	2436800	2440399	1064	351	2.89013e-183	2.81555	4.51082e-182	AT1G07890
chr1	19915400	19916999	297	98	5.96153e-53	2.81488	3.001e-52	AT1G53380
chr1	26239600	26240799	315	104	5.81404e-56	2.81324	3.08883e-55	AT1G69760
chr3	10587400	10590799	781	258	6.39301e-135	2.81164	7.72371e-134	AT3G28330
chr3	10587400	10590799	781	258	6.39301e-135	2.81164	7.72371e-134	AT3G28340
chr5	261000	268599	2042	675	0	2.80984	0	AT5G01710
chr5	261000	268599	2042	675	0	2.80984	0	AT5G01712
chr5	261000	268599	2042	675	0	2.80984	0	AT5G01720
chr5	261000	268599	2042	675	0	2.80984	0	AT5G01700
chr2	14173200	14173799	121	40	7.11962e-23	2.80966	1.49737e-22	AT2G33450
chr2	14173200	14173799	121	40	7.11962e-23	2.80966	1.49737e-22	AT2G33440
chr4	15130000	15130599	130	43	2.17993e-24	2.80804	4.88053e-24	AT4G31110
chr4	15130000	15130599	130	43	2.17993e-24	2.80804	4.88053e-24	AT4G31115
chr3	561600	562199	133	44	6.82302e-25	2.80755	1.56297e-24	AT3G02620
chr3	561600	562199	133	44	6.82302e-25	2.80755	1.56297e-24	AT3G02630
chr2	2287200	2289399	589	195	5.02633e-102	2.8055	4.89429e-101	AT2G05940
chr5	229200	231199	465	154	4.92927e-81	2.80454	3.92178e-80	AT5G01610
chr5	229200	231199	465	154	4.92927e-81	2.80454	3.92178e-80	AT5G01595
chr5	229200	231199	465	154	4.92927e-81	2.80454	3.92178e-80	AT5G01600
chr2	220400	221399	160	53	1.98464e-29	2.80397	5.5238e-29	AT2G01480
chr2	220400	221399	160	53	1.98464e-29	2.80397	5.5238e-29	AT2G01490
chr2	17701200	17701799	163	54	6.22335e-30	2.80364	1.76527e-29	AT2G42500
chr2	17701200	17701799	163	54	6.22335e-30	2.80364	1.76527e-29	AT2G42510
chr2	8122200	8123199	199	66	5.68452e-36	2.80052	1.97265e-35	AT2G18735
chr2	8122200	8123199	199	66	5.68452e-36	2.80052	1.97265e-35	AT2G18740
chr3	2347400	2349199	428	142	1.43609e-74	2.79952	1.0364e-73	AT3G07350
chr2	18817400	18823199	1419	471	4.63257e-241	2.79827	9.32806e-240	AT2G45670
chr2	18817400	18823199	1419	471	4.63257e-241	2.79827	9.32806e-240	AT2G45680
chr2	18817400	18823199	1419	471	4.63257e-241	2.79827	9.32806e-240	AT2G45685
chr2	18817400	18823199	1419	471	4.63257e-241	2.79827	9.32806e-240	AT2G45690
chr1	29235600	29239599	1119	372	3.48305e-190	2.79393	5.68086e-189	AT1G77760
chr2	7994400	7997599	881	293	3.36962e-150	2.79278	4.45008e-149	AT2G18420
chr2	7994400	7997599	881	293	3.36962e-150	2.79278	4.45008e-149	AT2G18450
chr2	7994400	7997599	881	293	3.36962e-150	2.79278	4.45008e-149	AT2G18440
chr3	1287200	1292199	1044	348	7.79799e-177	2.78644	1.17764e-175	AT3G04730
chr3	1287200	1292199	1044	348	7.79799e-177	2.78644	1.17764e-175	AT3G04732
chr4	17225400	17226999	390	130	1.17646e-67	2.78644	7.64463e-67	AT4G36500
chr5	3283600	3286599	796	266	6.74008e-135	2.77946	8.11296e-134	AT5G10450
chr1	25047200	25050199	726	243	6.15937e-123	2.77498	7.0746e-122	AT1G67090
chr1	5699600	5703199	800	268	5.20511e-135	2.77258	6.31192e-134	AT1G16670
chr1	5699600	5703199	800	268	5.20511e-135	2.77258	6.31192e-134	AT1G16680
chr1	26814800	26816599	358	120	9.5242e-62	2.77096	5.61807e-61	AT1G71100
chr1	2177400	2178599	286	96	1.05555e-49	2.76709	5.03393e-49	AT1G07100
chr1	2177400	2178599	286	96	1.05555e-49	2.76709	5.03393e-49	AT1G07110
chr1	11609600	11612399	572	192	5.97978e-97	2.76709	5.58912e-96	AT1G32220
chr1	11609600	11612399	572	192	5.97978e-97	2.76709	5.58912e-96	AT1G32225
chr1	11609600	11612399	572	192	5.97978e-97	2.76709	5.58912e-96	AT1G32230
chr1	25229800	25232999	845	284	1.08704e-141	2.76355	1.34316e-140	AT1G67340
chr1	1660600	1662399	350	118	7.41223e-60	2.75496	4.25681e-59	AT1G05575
chr1	1660600	1662399	350	118	7.41223e-60	2.75496	4.25681e-59	AT1G05577
chr1	11738200	11740399	602	203	3.92776e-101	2.75441	3.75729e-100	AT1G32460
chr1	11738200	11740399	602	203	3.92776e-101	2.75441	3.75729e-100	AT1G32470
chr3	6551200	6551999	163	55	4.34213e-29	2.75267	1.18428e-28	AT3G18990
chr3	22809400	22810799	311	105	2.47145e-53	2.75106	1.25379e-52	AT3G61640
chr3	8685400	8687799	533	180	1.30488e-89	2.75032	1.13205e-88	AT3G24050
chr1	18319600	18322599	571	193	1.10679e-95	2.74794	1.03153e-94	AT1G49490
chr1	18319600	18322599	571	193	1.10679e-95	2.74794	1.03153e-94	AT1G49500
chr1	19174000	19175599	396	134	5.35623e-67	2.74485	3.45297e-66	AT1G51700
chr1	180000	180999	195	66	3.4998e-34	2.74422	1.13595e-33	AT1G01490
chr1	26694600	26696399	428	145	4.51533e-72	2.7416	3.16073e-71	AT1G70780
chr1	26694600	26696399	428	145	4.51533e-72	2.7416	3.16073e-71	AT1G70782
chr2	15136000	15136799	165	56	3.78319e-29	2.73668	1.03443e-28	AT2G36050
chr5	25075600	25081399	1352	460	1.60114e-220	2.72991	2.93423e-219	AT5G62460
chr5	25075600	25081399	1352	460	1.60114e-220	2.72991	2.93423e-219	AT5G62470
chr1	739400	747599	2122	722	0	2.72984	0	AT1G03090
chr1	739400	747599	2122	722	0	2.72984	0	AT1G03100
chr1	739400	747599	2122	722	0	2.72984	0	AT1G03103
chr1	10860000	10860799	144	49	1.27488e-25	2.72958	2.99616e-25	AT1G30630
chr1	10860000	10860799	144	49	1.27488e-25	2.72958	2.99616e-25	AT1G30640
chr1	10264200	10266799	670	228	1.41705e-110	2.72941	1.47211e-109	AT1G29340
chr2	15988600	15989599	191	65	3.08323e-33	2.72928	9.73621e-33	AT2G38160
chr2	15988600	15989599	191	65	3.08323e-33	2.72928	9.73621e-33	AT2G38170
chr2	17360400	17364399	1078	367	3.41526e-176	2.72823	5.1339e-175	AT2G41640
chr2	17360400	17364399	1078	367	3.41526e-176	2.72823	5.1339e-175	AT2G41650
chr4	7214600	7216599	443	151	9.20087e-74	2.72493	6.51046e-73	AT4G12040
chr4	9660800	9663999	865	295	1.74635e-141	2.72347	2.14965e-140	AT4G17230
chr1	537600	538799	208	71	8.15153e-36	2.72103	2.80785e-35	AT1G02560
chr3	22741400	22742799	284	97	5.34993e-48	2.71941	2.48243e-47	AT3G61460
chr4	386600	387999	240	82	6.63582e-41	2.71848	2.63976e-40	AT4G00905
chr5	18834600	18835599	187	64	2.70174e-32	2.71388	8.29857e-32	AT5G46440
chr4	12137800	12144999	1836	629	5.33591e-295	2.71113	1.3087e-293	AT4G23190
chr4	12137800	12144999	1836	629	5.33591e-295	2.71113	1.3087e-293	AT4G23205
chr4	12137800	12144999	1836	629	5.33591e-295	2.71113	1.3087e-293	AT4G23180
chr2	2329400	2330999	359	123	9.93179e-60	2.71093	5.68377e-59	AT2G06000
chr2	2329400	2330999	359	123	9.93179e-60	2.71093	5.68377e-59	AT2G06002
chr4	2661400	2662799	353	121	9.99199e-59	2.70968	5.60996e-58	AT4G05150
chr4	12519800	12520799	242	83	5.71275e-41	2.70811	2.2851e-40	AT4G24110
chr4	12519800	12520799	242	83	5.71275e-41	2.70811	2.2851e-40	AT4G24100
chr5	6217600	6218599	242	83	5.71275e-41	2.70811	2.2851e-40	AT5G18650
chr2	18698800	18699399	134	46	1.14567e-23	2.70568	2.48648e-23	AT2G45360
chr1	29178600	29180199	396	136	2.24764e-65	2.70449	1.40456e-64	AT1G77640
chr4	18213600	18218799	1336	459	2.26793e-214	2.70348	4.02065e-213	AT4G39080
chr4	18213600	18218799	1336	459	2.26793e-214	2.70348	4.02065e-213	AT4G39090
chr4	18213600	18218799	1336	459	2.26793e-214	2.70348	4.02065e-213	AT4G39100
chr2	14534200	14534799	128	44	1.16971e-22	2.70201	2.42876e-22	AT2G34480
chr5	17458600	17459399	157	54	2.91749e-27	2.70044	7.44086e-27	AT5G43450
chr5	17458600	17459399	157	54	2.91749e-27	2.70044	7.44086e-27	AT5G43455
chr2	10765000	10765999	218	75	5.96016e-37	2.69975	2.14829e-36	AT2G25290
chr4	18458000	18459199	380	131	1.95174e-62	2.69427	1.16818e-61	AT4G39780
chr5	3161600	3162599	171	59	2.42202e-29	2.69199	6.70683e-29	AT5G10100
chr1	7216600	7217199	142	49	9.63915e-25	2.69167	2.19267e-24	AT1G20770
chr1	7216600	7217199	142	49	9.63915e-25	2.69167	2.19267e-24	AT1G20780
chr4	1277800	1280399	681	235	9.82248e-110	2.69159	1.01395e-108	AT4G02890
chr4	1277800	1280399	681	235	9.82248e-110	2.69159	1.01395e-108	AT4G02880
chr3	3724000	3731799	2051	708	0	2.69068	0	AT3G11780
chr3	3724000	3731799	2051	708	0	2.69068	0	AT3G11800
chr3	3724000	3731799	2051	708	0	2.69068	0	AT3G11810
chr3	3724000	3731799	2051	708	0	2.69068	0	AT3G11820
chr3	3724000	3731799	2051	708	0	2.69068	0	AT3G11825
chr4	10942000	10943599	338	117	2.01706e-55	2.68324	1.05953e-54	AT4G20260
chr1	8974600	8978399	907	314	1.7133e-144	2.68291	2.14953e-143	AT1G25540
chr1	8974600	8978399	907	314	1.7133e-144	2.68291	2.14953e-143	AT1G25550
chr5	17712400	17714999	595	206	1.16225e-95	2.68274	1.08013e-94	AT5G44020
chr5	17712400	17714999	595	206	1.16225e-95	2.68274	1.08013e-94	AT5G44030
chr3	383200	387799	915	317	1.45938e-145	2.68096	1.85233e-144	AT3G02130
chr3	383200	387799	915	317	1.45938e-145	2.68096	1.85233e-144	AT3G02140
chr4	9601000	9608199	1793	622	5.06588e-282	2.67743	1.19746e-280	AT4G17080
chr4	9601000	9608199	1793	622	5.06588e-282	2.67743	1.19746e-280	AT4G17085
chr4	9601000	9608199	1793	622	5.06588e-282	2.67743	1.19746e-280	AT4G17090
chr1	30156200	30158199	392	136	1.20344e-63	2.67717	7.3376e-63	AT1G80180
chr1	197400	202399	1146	398	7.00245e-181	2.67442	1.08771e-179	AT1G01550
chr1	197400	202399	1146	398	7.00245e-181	2.67442	1.08771e-179	AT1G01560
chr1	197400	202399	1146	398	7.00245e-181	2.67442	1.08771e-179	AT1G01540
chr3	4379600	4380199	118	41	1.04417e-20	2.67317	1.99185e-20	AT3G13445
chr3	22675000	22677399	463	161	1.93212e-74	2.67106	1.3913e-73	AT3G61260
chr2	11860400	11862199	414	144	8.60415e-67	2.67034	5.53584e-66	AT2G27830
chr2	11860400	11862199	414	144	8.60415e-67	2.67034	5.53584e-66	AT2G27840
chr2	18372600	18377799	1183	412	9.81202e-186	2.66696	1.56131e-184	AT2G44500
chr2	18372600	18377799	1183	412	9.81202e-186	2.66696	1.56131e-184	AT2G44510
chr2	9788000	9790799	445	155	1.93918e-71	2.6666	1.33734e-70	AT2G22990
chr2	16049200	16053199	867	302	8.7544e-137	2.6665	1.06954e-135	AT2G38310
chr3	17987000	17987799	155	54	2.1567e-26	2.66604	5.30556e-26	AT3G48530
chr5	17235000	17235599	132	46	8.52128e-23	2.66529	1.78297e-22	AT5G42960
chr5	2855000	2861199	1623	566	3.23279e-253	2.66337	6.75985e-252	AT5G08760
chr5	2855000	2861199	1623	566	3.23279e-253	2.66337	6.75985e-252	AT5G08770
chr5	2855000	2861199	1623	566	3.23279e-253	2.66337	6.75985e-252	AT5G08780
chr5	2855000	2861199	1623	566	3.23279e-253	2.66337	6.75985e-252	AT5G08790
chr2	17410600	17411199	129	45	2.71986e-22	2.6626	5.57998e-22	AT2G41740
chr2	19696400	19698199	1376	480	5.49409e-215	2.6626	9.7933e-214	AT2G48160
chr3	2611200	2612599	258	90	2.55133e-42	2.6626	1.05214e-41	AT3G08590
chr3	2611200	2612599	258	90	2.55133e-42	2.6626	1.05214e-41	AT3G08600
chr3	2952400	2954399	344	120	1.23313e-55	2.6626	6.48785e-55	AT3G09630
chr4	11742000	11743199	301	105	5.58118e-49	2.6626	2.63852e-48	AT4G22190
chr1	26399200	26406599	1711	597	1.48226e-266	2.66198	3.35774e-265	AT1G70090
chr1	26399200	26406599	1711	597	1.48226e-266	2.66198	3.35774e-265	AT1G70100
chr1	26399200	26406599	1711	597	1.48226e-266	2.66198	3.35774e-265	AT1G70110
chr5	26157000	26157599	126	44	8.68296e-22	2.65979	1.74193e-21	AT5G65440
chr5	26157000	26157599	126	44	8.68296e-22	2.65979	1.74193e-21	AT5G65445
chr1	3639600	3640399	166	58	5.65661e-28	2.65833	1.49046e-27	AT1G10910
chr5	25263600	25264199	123	43	2.77251e-21	2.65684	5.43832e-21	AT5G62950
chr1	12582000	12582999	200	70	3.82303e-33	2.65375	1.20142e-32	AT1G34418
chr1	6567800	6569999	467	164	8.28822e-74	2.64486	5.87743e-73	AT1G19020
chr1	6567800	6569999	467	164	8.28822e-74	2.64486	5.87743e-73	AT1G19025
chr2	1966400	1968599	447	157	9.82409e-71	2.64446	6.70422e-70	AT2G05380
chr5	3377000	3379199	537	189	3.53836e-84	2.63901	2.90734e-83	AT5G10695
chr5	3377000	3379199	537	189	3.53836e-84	2.63901	2.90734e-83	AT5G10700
chr5	3377000	3379199	537	189	3.53836e-84	2.63901	2.90734e-83	AT5G10710
chr5	3377000	3379199	537	189	3.53836e-84	2.63901	2.90734e-83	AT5G10690
chr3	256600	258799	500	176	1.56594e-78	2.63868	1.19069e-77	AT3G01690
chr3	2472800	2473599	213	75	8.46603e-35	2.63783	2.81224e-34	AT3G07740
chr3	2472800	2473599	213	75	8.46603e-35	2.63783	2.81224e-34	AT3G07750
chr3	19310200	19313799	849	300	1.06456e-130	2.62854	1.24913e-129	AT3G52060
chr3	19310200	19313799	849	300	1.06456e-130	2.62854	1.24913e-129	AT3G52070
chr3	19310200	19313799	849	300	1.06456e-130	2.62854	1.24913e-129	AT3G52072
chr2	18862400	18867999	1160	410	1.55094e-177	2.62786	2.36409e-176	AT2G45810
chr2	18862400	18867999	1160	410	1.55094e-177	2.62786	2.36409e-176	AT2G45820
chr2	18862400	18867999	1160	410	1.55094e-177	2.62786	2.36409e-176	AT2G45830
chr5	206000	206799	147	52	1.57356e-24	2.62569	3.54485e-24	AT5G01520
chr3	18616200	18616799	127	45	1.96069e-21	2.62132	3.86685e-21	AT3G50210
chr5	21124200	21124799	155	55	1.30036e-25	2.61757	3.05384e-25	AT5G52020
chr3	16756800	16759199	580	206	2.71905e-89	2.61511	2.35266e-88	AT3G45640
chr5	2892000	2893199	290	103	7.41687e-46	2.61511	3.28275e-45	AT5G09320
chr5	2892000	2893199	290	103	7.41687e-46	2.61511	3.28275e-45	AT5G09330
chr4	17698600	17699399	152	54	4.13333e-25	2.61444	9.56235e-25	AT4G37670
chr1	26470800	26474799	993	353	8.10699e-151	2.61278	1.07939e-149	AT1G70290
chr4	14807000	14807999	180	64	2.77637e-29	2.61229	7.65555e-29	AT4G30230
chr4	14807000	14807999	180	64	2.77637e-29	2.61229	7.65555e-29	AT4G30240
chr1	3252200	3256399	1082	385	7.94161e-164	2.61033	1.10707e-162	AT1G09970
chr1	3252200	3256399	1082	385	7.94161e-164	2.61033	1.10707e-162	AT1G09980
chr4	10640600	10647199	1518	541	4.0655e-228	2.60617	7.71027e-227	AT4G19520
chr1	7088000	7089199	356	127	2.50202e-55	2.60361	1.31215e-54	AT1G20450
chr1	23390800	23392799	440	157	8.69231e-68	2.60305	5.65954e-67	AT1G63080
chr1	23390800	23392799	440	157	8.69231e-68	2.60305	5.65954e-67	AT1G63090
chr1	19844600	19851999	1843	658	1.71647e-275	2.60153	3.97102e-274	AT1G53210
chr1	19844600	19851999	1843	658	1.71647e-275	2.60153	3.97102e-274	AT1G53220
chr1	19844600	19851999	1843	658	1.71647e-275	2.60153	3.97102e-274	AT1G53230
chr1	19844600	19851999	1843	658	1.71647e-275	2.60153	3.97102e-274	AT1G53233
chr1	3018000	3018599	126	45	5.20406e-21	2.60068	1.00746e-20	AT1G09340
chr5	387800	389199	207	74	4.96106e-33	2.59817	1.55456e-32	AT5G02020
chr5	387800	389199	207	74	4.96106e-33	2.59817	1.55456e-32	AT5G02021
chr4	15289400	15292599	740	265	1.36386e-111	2.59367	1.43977e-110	AT4G31550
chr4	16340800	16351199	2721	975	0	2.59211	0	AT4G34120
chr4	16340800	16351199	2721	975	0	2.59211	0	AT4G34131
chr4	16340800	16351199	2721	975	0	2.59211	0	AT4G34135
chr4	16340800	16351199	2721	975	0	2.59211	0	AT4G34138
chr4	16340800	16351199	2721	975	0	2.59211	0	AT4G34140
chr5	20786600	20789399	597	215	1.29509e-89	2.57908	1.12655e-88	AT5G51140
chr5	20786600	20789399	597	215	1.29509e-89	2.57908	1.12655e-88	AT5G51150
chr1	20912400	20913799	383	138	2.56323e-58	2.5778	1.42684e-57	AT1G55920
chr1	18748200	18748599	97	35	2.13035e-16	2.57414	3.26408e-16	AT1G50620
chr2	15088800	15089599	169	61	6.08888e-27	2.57327	1.52374e-26	AT2G35940
chr3	3281200	3282199	169	61	6.08888e-27	2.57327	1.52374e-26	AT3G10525
chr1	3140600	3141199	119	43	1.38531e-19	2.57044	2.49939e-19	AT1G09710
chr3	4650800	4653999	749	271	7.3774e-111	2.56709	7.71317e-110	AT3G14050
chr3	4510400	4517799	1802	652	5.13269e-263	2.56706	1.13127e-261	AT3G13750
chr3	4510400	4517799	1802	652	5.13269e-263	2.56706	1.13127e-261	AT3G13760
chr1	813000	813599	116	42	4.40414e-19	2.5653	7.72798e-19	AT1G03300
chr1	813000	813599	116	42	4.40414e-19	2.5653	7.72798e-19	AT1G03310
chr4	16258200	16263199	1118	405	7.67775e-164	2.56399	1.07488e-162	AT4G33910
chr4	16258200	16263199	1118	405	7.67775e-164	2.56399	1.07488e-162	AT4G33920
chr1	30011200	30011799	160	58	1.9315e-25	2.56225	4.50683e-25	AT1G79750
chr4	10578000	10579399	226	82	5.97084e-35	2.5599	1.98947e-34	AT4G19395
chr5	20090600	20092999	531	193	1.11504e-78	2.55544	8.49828e-78	AT5G49520
chr1	9884000	9887999	800	291	4.22505e-117	2.55344	4.6094e-116	AT1G28280
chr1	9884000	9887999	800	291	4.22505e-117	2.55344	4.6094e-116	AT1G28281
chr2	1022400	1023399	206	75	7.18403e-32	2.55114	2.17589e-31	AT2G03360
chr3	22373000	22374799	401	146	7.87635e-60	2.55106	4.51541e-59	AT3G60530
chr3	19449000	19451599	505	184	1.28127e-74	2.54919	9.26722e-74	AT3G52470
chr1	5199000	5199599	126	46	2.92987e-20	2.54414	5.48635e-20	AT1G15110
chr5	9160000	9160399	93	34	1.77527e-15	2.54058	2.59682e-15	AT5G26210
chr4	14796600	14800799	1028	376	3.05161e-148	2.53942	3.95014e-147	AT4G30210
chr1	22884600	22885199	123	45	9.28634e-20	2.53876	1.69751e-19	AT1G61900
chr5	25019000	25019599	123	45	9.28634e-20	2.53876	1.69751e-19	AT5G62290
chr5	9096200	9099599	847	310	1.89144e-122	2.53776	2.1573e-121	AT5G26030
chr5	9096200	9099599	847	310	1.89144e-122	2.53776	2.1573e-121	AT5G26038
chr5	9096200	9099599	847	310	1.89144e-122	2.53776	2.1573e-121	AT5G26040
chr1	4289400	4290999	448	164	6.48756e-66	2.53725	4.1172e-65	AT1G12610
chr3	18572600	18573199	131	48	7.53792e-21	2.53489	1.45066e-20	AT3G50080
chr3	1538400	1539999	251	92	6.9748e-38	2.53405	2.57665e-37	AT3G05370
chr3	1538400	1539999	251	92	6.9748e-38	2.53405	2.57665e-37	AT3G05380
chr1	21553000	21553799	150	55	1.57762e-23	2.53313	3.38789e-23	AT1G58200
chr1	21553000	21553799	150	55	1.57762e-23	2.53313	3.38789e-23	AT1G58210
chr3	18493800	18494799	169	62	3.3257e-26	2.53177	8.1019e-26	AT3G49870
chr1	23129000	23129599	128	47	2.38582e-20	2.52954	4.48045e-20	AT1G62480
chr2	18422800	18423799	177	65	2.7171e-27	2.52923	6.94607e-27	AT2G44660
chr3	4747600	4747999	98	36	4.54378e-16	2.52844	6.86513e-16	AT3G14260
chr3	15901800	15903399	381	140	4.89509e-56	2.5277	2.60486e-55	AT3G44190
chr3	5758000	5763599	1202	442	3.38971e-171	2.52587	4.89258e-170	AT3G16857
chr3	5758000	5763599	1202	442	3.38971e-171	2.52587	4.89258e-170	AT3G16860
chr3	5758000	5763599	1202	442	3.38971e-171	2.52587	4.89258e-170	AT3G16870
chr1	8860600	8861999	329	121	1.23404e-48	2.52545	5.80036e-48	AT1G25275
chr5	2828600	2829199	125	46	7.54992e-20	2.52395	1.3867e-19	AT5G08690
chr5	2828600	2829199	125	46	7.54992e-20	2.52395	1.3867e-19	AT5G08695
chr4	12611600	12615999	1060	391	2.05564e-150	2.51801	2.72582e-149	AT4G24370
chr4	12611600	12615999	1060	391	2.05564e-150	2.51801	2.72582e-149	AT4G24380
chr4	12611600	12615999	1060	391	2.05564e-150	2.51801	2.72582e-149	AT4G24390
chr4	1382400	1382999	149	55	4.03974e-23	2.51624	8.5569e-23	AT4G03113
chr4	1382400	1382999	149	55	4.03974e-23	2.51624	8.5569e-23	AT4G03115
chr3	3645600	3647399	363	134	4.62239e-53	2.51612	2.33409e-52	AT3G11560
chr3	3645600	3647399	363	134	4.62239e-53	2.51612	2.33409e-52	AT3G11570
chr5	2203800	2207199	858	317	7.05312e-122	2.51395	8.01647e-121	AT5G07090
chr5	2203800	2207199	858	317	7.05312e-122	2.51395	8.01647e-121	AT5G07100
chr5	2203800	2207199	858	317	7.05312e-122	2.51395	8.01647e-121	AT5G07110
chr5	2203800	2207199	858	317	7.05312e-122	2.51395	8.01647e-121	AT5G07120
chr1	17285200	17286999	265	98	3.04863e-39	2.51159	1.16996e-38	AT1G47128
chr1	4229200	4231599	392	145	6.70338e-57	2.511	3.65049e-56	AT1G12423
chr4	12399000	12400199	197	73	1.18851e-29	2.50653	3.32783e-29	AT4G23820
chr1	1995600	1996199	143	53	4.01707e-22	2.50605	8.16937e-22	AT1G06520
chr3	16556800	16558199	232	86	1.70059e-34	2.50564	5.59205e-34	AT3G45210
chr3	18158400	18161599	833	309	1.58678e-117	2.50389	1.73694e-116	AT3G48980
chr3	18158400	18161599	833	309	1.58678e-117	2.50389	1.73694e-116	AT3G48990
chr5	7207000	7208999	458	170	1.16729e-65	2.50233	7.35078e-65	AT5G21170
chr5	7207000	7208999	458	170	1.16729e-65	2.50233	7.35078e-65	AT5G21222
chr5	552800	557399	1058	393	3.37939e-148	2.50047	4.35715e-147	AT5G02500
chr5	26452800	26460999	1878	699	5.16448e-260	2.49544	1.13064e-258	AT5G66190
chr5	26452800	26460999	1878	699	5.16448e-260	2.49544	1.13064e-258	AT5G66200
chr5	26452800	26460999	1878	699	5.16448e-260	2.49544	1.13064e-258	AT5G66210
chr5	26452800	26460999	1878	699	5.16448e-260	2.49544	1.13064e-258	AT5G66211
chr5	22312400	22313399	220	82	1.64187e-32	2.49194	5.07177e-32	AT5G54960
chr5	22312400	22313399	220	82	1.64187e-32	2.49194	5.07177e-32	AT5G54970
chr2	7494400	7496199	397	148	8.79503e-57	2.49148	4.76568e-56	AT2G17230
chr5	26949400	26950799	260	97	6.06795e-38	2.48961	2.2544e-37	AT5G67560
chr1	17192600	17193399	150	56	8.26133e-23	2.4879	1.73079e-22	AT1G45688
chr5	25321600	25324599	616	230	1.62998e-86	2.48761	1.36333e-85	AT5G63120
chr5	25321600	25324599	616	230	1.62998e-86	2.48761	1.36333e-85	AT5G63130
chr3	11191200	11193399	490	183	2.74178e-69	2.48699	1.82152e-68	AT3G29240
chr3	1258800	1262199	912	342	7.58548e-126	2.47684	8.80564e-125	AT3G04630
chr3	1258800	1262199	912	342	7.58548e-126	2.47684	8.80564e-125	AT3G04650
chr3	1258800	1262199	912	342	7.58548e-126	2.47684	8.80564e-125	AT3G04640
chr2	7692400	7693799	253	95	1.48284e-36	2.47358	5.28638e-36	AT2G17705
chr2	7692400	7693799	253	95	1.48284e-36	2.47358	5.28638e-36	AT2G17710
chr4	2593400	2594599	221	83	3.29714e-32	2.47311	1.0061e-31	AT4G05070
chr4	2593400	2594599	221	83	3.29714e-32	2.47311	1.0061e-31	AT4G05071
chr4	5268200	5268399	221	83	3.29714e-32	2.47311	1.0061e-31	AT4G08345
chr4	7602000	7602999	221	83	3.29714e-32	2.47311	1.0061e-31	AT4G13010
chr2	17489400	17490599	213	80	4.03214e-31	2.47297	1.1968e-30	AT2G41900
chr1	130400	131399	181	68	9.08466e-27	2.47228	2.26042e-26	AT1G01320
chr3	21759800	21761599	258	97	3.7946e-37	2.47045	1.3784e-36	AT3G58850
chr1	25296800	25298199	319	120	2.44755e-45	2.4691	1.07167e-44	AT1G67510
chr1	25296800	25298199	319	120	2.44755e-45	2.4691	1.07167e-44	AT1G67500
chr1	20560400	20562599	364	137	2.36774e-51	2.4678	1.15622e-50	AT1G55110
chr3	8181000	8182199	308	116	9.27306e-44	2.46616	3.94892e-43	AT3G23030
chr3	16788200	16790599	374	141	1.55483e-52	2.46366	7.75511e-52	AT3G45730
chr3	6780200	6780999	183	69	7.24928e-27	2.46338	1.81065e-26	AT3G19540
chr3	20736400	20737599	188	71	1.84721e-27	2.4594	4.74831e-27	AT3G55880
chr4	9254000	9256199	553	209	3.57771e-76	2.45758	2.65239e-75	AT4G16380
chr4	9329400	9333999	973	368	6.06847e-132	2.45581	7.17223e-131	AT4G16563
chr5	965000	967199	428	162	2.45926e-59	2.4539	1.40002e-58	AT5G03690
chr5	965000	967199	428	162	2.45926e-59	2.4539	1.40002e-58	AT5G03700
chr5	6466200	6468599	544	206	1.06677e-74	2.45279	7.75011e-74	AT5G19220
chr5	6466200	6468599	544	206	1.06677e-74	2.45279	7.75011e-74	AT5G19221
chr5	6466200	6468599	544	206	1.06677e-74	2.45279	7.75011e-74	AT5G19230
chr1	5727000	5727799	161	61	1.07052e-23	2.45146	2.33114e-23	AT1G16730
chr1	5727000	5727799	161	61	1.07052e-23	2.45146	2.33114e-23	AT1G16740
chr4	9991000	9994999	894	339	7.70595e-121	2.44944	8.66786e-120	AT4G18010
chr3	3418800	3420999	411	156	8.90243e-57	2.44707	4.81587e-56	AT3G10920
chr3	3418800	3420999	411	156	8.90243e-57	2.44707	4.81587e-56	AT3G10930
chr1	116000	129399	2981	1132	0	2.44593	0	AT1G01300
chr1	116000	129399	2981	1132	0	2.44593	0	AT1G01305
chr1	116000	129399	2981	1132	0	2.44593	0	AT1G01310
chr1	116000	129399	2981	1132	0	2.44593	0	AT1G01320
chr1	116000	129399	2981	1132	0	2.44593	0	AT1G01290
chr5	20899600	20901599	287	109	2.61572e-40	2.44559	1.03049e-39	AT5G51460
chr1	29641000	29647399	1328	505	2.81216e-177	2.44251	4.26664e-176	AT1G78850
chr1	29641000	29647399	1328	505	2.81216e-177	2.44251	4.26664e-176	AT1G78860
chr4	9945000	9948399	560	213	3.49293e-76	2.44195	2.59543e-75	AT4G17900
chr1	21623800	21626399	602	229	1.0725e-81	2.44169	8.59582e-81	AT1G58290
chr1	26512400	26514999	481	183	9.5597e-66	2.44131	6.03167e-65	AT1G70370
chr1	789800	791399	339	129	5.07993e-47	2.44084	2.30149e-46	AT1G03230
chr5	25841600	25844199	507	193	4.27166e-69	2.43994	2.82068e-68	AT5G64660
chr1	21005400	21008199	548	209	3.19811e-74	2.43536	2.2928e-73	AT1G56145
chr1	21005400	21008199	548	209	3.19811e-74	2.43536	2.2928e-73	AT1G56140
chr2	14208600	14209399	152	58	3.26527e-22	2.43413	6.67584e-22	AT2G33540
chr5	16569400	16570199	152	58	3.26527e-22	2.43413	6.67584e-22	AT5G41400
chr2	10426000	10429599	757	289	2.16689e-101	2.43291	2.09124e-100	AT2G24540
chr2	10426000	10429599	757	289	2.16689e-101	2.43291	2.09124e-100	AT2G24545
chr2	10426000	10429599	757	289	2.16689e-101	2.43291	2.09124e-100	AT2G24550
chr3	3944800	3945999	343	131	3.17898e-47	2.43193	1.4483e-46	AT3G12400
chr5	17522400	17523799	335	128	3.86024e-46	2.43088	1.72258e-45	AT5G43620
chr5	9629000	9632799	688	263	3.8005e-92	2.42975	3.42465e-91	AT5G27320
chr5	9629000	9632799	688	263	3.8005e-92	2.42975	3.42465e-91	AT5G27330
chr3	8941200	8944199	596	228	4.83731e-80	2.42795	3.74805e-79	AT3G24518
chr3	8941200	8944199	596	228	4.83731e-80	2.42795	3.74805e-79	AT3G24520
chr1	11221400	11222799	290	111	4.01743e-40	2.42663	1.5789e-39	AT1G31350
chr1	19819800	19822199	504	193	6.23022e-68	2.4255	4.06459e-67	AT1G53170
chr5	20800200	20802199	459	176	6.3144e-62	2.42231	3.73822e-61	AT5G51180
chr5	20800200	20802199	459	176	6.3144e-62	2.42231	3.73822e-61	AT5G51190
chr1	29446800	29459999	2978	1142	0	2.42207	0	AT1G78260
chr1	29446800	29459999	2978	1142	0	2.42207	0	AT1G78265
chr1	29446800	29459999	2978	1142	0	2.42207	0	AT1G78270
chr1	29446800	29459999	2978	1142	0	2.42207	0	AT1G78280
chr1	29446800	29459999	2978	1142	0	2.42207	0	AT1G78290
chr5	16688400	16692999	1023	393	1.72664e-134	2.41775	2.06312e-133	AT5G41740
chr4	9556200	9558799	557	214	2.38179e-74	2.41752	1.71132e-73	AT4G16980
chr5	25753000	25754999	320	123	1.09519e-43	2.41643	4.65169e-43	AT5G64410
chr3	6168600	6171799	658	253	2.95466e-87	2.41565	2.49692e-86	AT3G18030
chr3	6168600	6171799	658	253	2.95466e-87	2.41565	2.49692e-86	AT3G18035
chr5	5418800	5420199	221	85	7.6847e-31	2.41492	2.26037e-30	AT5G16567
chr1	7493200	7497599	886	341	2.11318e-116	2.41328	2.29773e-115	AT1G21400
chr1	7493200	7497599	886	341	2.11318e-116	2.41328	2.29773e-115	AT1G21410
chr5	7663200	7668599	1089	420	6.55244e-142	2.40828	8.12702e-141	AT5G22910
chr5	7663200	7668599	1089	420	6.55244e-142	2.40828	8.12702e-141	AT5G22920
chr5	7663200	7668599	1089	420	6.55244e-142	2.40828	8.12702e-141	AT5G22930
chr4	11006000	11007399	337	130	1.41985e-45	2.40777	6.25884e-45	AT4G20380
chr4	11006000	11007399	337	130	1.41985e-45	2.40777	6.25884e-45	AT4G20390
chr4	18485600	18487399	352	136	2.3397e-47	2.40399	1.07192e-46	AT4G39838
chr4	18485600	18487399	352	136	2.3397e-47	2.40399	1.07192e-46	AT4G39840
chr1	28668800	28669999	295	114	4.76027e-40	2.40351	1.86859e-39	AT1G76410
chr5	22306200	22309799	830	321	3.53168e-108	2.40161	3.57775e-107	AT5G54930
chr5	22306200	22309799	830	321	3.53168e-108	2.40161	3.57775e-107	AT5G54940
chr5	19975800	19978199	473	183	1.17036e-62	2.40071	7.04375e-62	AT5G49280
chr4	7042400	7043799	266	103	3.36228e-36	2.39869	1.17933e-35	AT4G11660
chr1	29354200	29360199	1288	499	6.89023e-166	2.39742	9.72983e-165	AT1G78070
chr2	10565600	10568599	609	236	1.00161e-79	2.39681	7.72402e-79	AT2G24780
chr2	10565600	10568599	609	236	1.00161e-79	2.39681	7.72402e-79	AT2G24790
chr2	6389200	6390399	196	76	3.40722e-27	2.39536	8.66617e-27	AT2G14860
chr4	12108600	12109799	196	76	3.40722e-27	2.39536	8.66617e-27	AT4G23103
chr4	12326600	12327999	263	102	1.03751e-35	2.39488	3.55501e-35	AT4G23650
chr4	12326600	12327999	263	102	1.03751e-35	2.39488	3.55501e-35	AT4G23660
chr2	11669600	11671999	546	212	1.85016e-71	2.39213	1.27865e-70	AT2G27260
chr2	8139400	8140599	206	80	2.18269e-28	2.3917	5.82647e-28	AT2G18790
chr1	28552600	28555999	594	231	2.72887e-77	2.38838	2.04165e-76	AT1G76100
chr1	28552600	28555999	594	231	2.72887e-77	2.38838	2.04165e-76	AT1G76110
chr1	4575400	4578199	658	256	2.78679e-85	2.38734	2.30723e-84	AT1G13350
chr1	4575400	4578199	658	256	2.78679e-85	2.38734	2.30723e-84	AT1G13360
chr5	26615200	26618599	789	307	9.60718e-102	2.38708	9.32697e-101	AT5G66675
chr5	26615200	26618599	789	307	9.60718e-102	2.38708	9.32697e-101	AT5G66680
chr1	22629600	22630599	203	79	6.74261e-28	2.3867	1.76946e-27	AT1G61340
chr3	3919000	3919599	131	51	9.27371e-19	2.38578	1.59888e-18	AT3G12290
chr3	3919000	3919599	131	51	9.27371e-19	2.38578	1.59888e-18	AT3G12280
chr3	7041600	7042399	208	81	1.70595e-28	2.3851	4.5688e-28	AT3G20170
chr5	7242400	7243799	295	115	2.16495e-39	2.38261	8.36736e-39	AT5G21930
chr5	7242400	7243799	295	115	2.16495e-39	2.38261	8.36736e-39	AT5G21920
chr5	4441400	4442199	159	62	3.03325e-22	2.38196	6.21121e-22	AT5G13760
chr5	4441400	4442199	159	62	3.03325e-22	2.38196	6.21121e-22	AT5G13750
chr5	22580600	22581999	318	124	2.92255e-42	2.38196	1.20068e-41	AT5G55790
chr5	22580600	22581999	318	124	2.92255e-42	2.38196	1.20068e-41	AT5G55800
chr2	16349600	16350999	269	105	4.94876e-36	2.37953	1.72282e-35	AT2G39190
chr2	3259600	3509799	157939	61663	0	2.379	0	AT2G07673
chr2	3259600	3509799	157939	61663	0	2.379	0	AT2G07674
chr2	3259600	3509799	157939	61663	0	2.379	0	AT2G07675
chr2	3259600	3509799	157939	61663	0	2.379	0	AT2G07676
chr2	3259600	3509799	157939	61663	0	2.379	0	AT2G07684
chr2	3259600	3509799	157939	61663	0	2.379	0	AT2G07745
chr2	3259600	3509799	157939	61663	0	2.379	0	AT2G07746
chr2	3259600	3509799	157939	61663	0	2.379	0	AT2G07751
chr2	3259600	3509799	157939	61663	0	2.379	0	AT2G07768
chr2	3259600	3509799	157939	61663	0	2.379	0	AT2G07669
chr2	3259600	3509799	157939	61663	0	2.379	0	AT2G07678
chr2	3259600	3509799	157939	61663	0	2.379	0	AT2G07681
chr2	3259600	3509799	157939	61663	0	2.379	0	AT2G07748
chr2	3259600	3509799	157939	61663	0	2.379	0	AT2G07778
chr2	3259600	3509799	157939	61663	0	2.379	0	AT2G07752
chr2	3259600	3509799	157939	61663	0	2.379	0	AT2G07753
chr2	3259600	3509799	157939	61663	0	2.379	0	AT2G07754
chr2	3259600	3509799	157939	61663	0	2.379	0	AT2G07772
chr2	3259600	3509799	157939	61663	0	2.379	0	AT2G07774
chr2	3259600	3509799	157939	61663	0	2.379	0	AT2G07687
chr2	3259600	3509799	157939	61663	0	2.379	0	AT2G07689
chr2	3259600	3509799	157939	61663	0	2.379	0	AT2G07691
chr2	3259600	3509799	157939	61663	0	2.379	0	AT2G07692
chr2	3259600	3509799	157939	61663	0	2.379	0	AT2G07755
chr2	3259600	3509799	157939	61663	0	2.379	0	AT2G07792
chr2	3259600	3509799	157939	61663	0	2.379	0	AT2G07599
chr2	3259600	3509799	157939	61663	0	2.379	0	AT2G07695
chr2	3259600	3509799	157939	61663	0	2.379	0	AT2G07696
chr2	3259600	3509799	157939	61663	0	2.379	0	AT2G07785
chr2	3259600	3509799	157939	61663	0	2.379	0	AT2G07667
chr2	3259600	3509799	157939	61663	0	2.379	0	AT2G07698
chr2	3259600	3509799	157939	61663	0	2.379	0	AT2G07701
chr2	3259600	3509799	157939	61663	0	2.379	0	AT2G07702
chr2	3259600	3509799	157939	61663	0	2.379	0	AT2G07793
chr2	3259600	3509799	157939	61663	0	2.379	0	AT2G07705
chr2	3259600	3509799	157939	61663	0	2.379	0	AT2G07706
chr2	3259600	3509799	157939	61663	0	2.379	0	AT2G07707
chr2	3259600	3509799	157939	61663	0	2.379	0	AT2G07708
chr2	3259600	3509799	157939	61663	0	2.379	0	AT2G07794
chr2	3259600	3509799	157939	61663	0	2.379	0	AT2G07713
chr2	3259600	3509799	157939	61663	0	2.379	0	AT2G07715
chr2	3259600	3509799	157939	61663	0	2.379	0	AT2G07718
chr2	3259600	3509799	157939	61663	0	2.379	0	AT2G07719
chr2	3259600	3509799	157939	61663	0	2.379	0	AT2G07721
chr2	3259600	3509799	157939	61663	0	2.379	0	AT2G07722
chr2	3259600	3509799	157939	61663	0	2.379	0	AT2G07724
chr2	3259600	3509799	157939	61663	0	2.379	0	AT2G07725
chr2	3259600	3509799	157939	61663	0	2.379	0	AT2G07727
chr2	3259600	3509799	157939	61663	0	2.379	0	AT2G07728
chr2	3259600	3509799	157939	61663	0	2.379	0	AT2G07756
chr2	3259600	3509799	157939	61663	0	2.379	0	AT2G07757
chr2	3259600	3509799	157939	61663	0	2.379	0	AT2G07815
chr2	3259600	3509799	157939	61663	0	2.379	0	AT2G07732
chr2	3259600	3509799	157939	61663	0	2.379	0	AT2G07758
chr2	3259600	3509799	157939	61663	0	2.379	0	AT2G07820
chr2	3259600	3509799	157939	61663	0	2.379	0	AT2G07775
chr2	3259600	3509799	157939	61663	0	2.379	0	AT2G07787
chr2	3259600	3509799	157939	61663	0	2.379	0	AT2G07806
chr2	3259600	3509799	157939	61663	0	2.379	0	AT2G07825
chr2	3259600	3509799	157939	61663	0	2.379	0	AT2G07827
chr2	3259600	3509799	157939	61663	0	2.379	0	AT2G07830
chr2	3259600	3509799	157939	61663	0	2.379	0	AT2G07738
chr2	3259600	3509799	157939	61663	0	2.379	0	AT2G07739
chr2	3259600	3509799	157939	61663	0	2.379	0	AT2G07741
chr2	3259600	3509799	157939	61663	0	2.379	0	AT2G07759
chr2	3259600	3509799	157939	61663	0	2.379	0	AT2G07761
chr2	3259600	3509799	157939	61663	0	2.379	0	AT2G07762
chr2	3259600	3509799	157939	61663	0	2.379	0	AT2G07763
chr2	3259600	3509799	157939	61663	0	2.379	0	AT2G07764
chr2	3259600	3509799	157939	61663	0	2.379	0	AT2G07765
chr2	3259600	3509799	157939	61663	0	2.379	0	AT2G07766
chr2	3259600	3509799	157939	61663	0	2.379	0	AT2G07795
chr2	3259600	3509799	157939	61663	0	2.379	0	AT2G07835
chr2	3259600	3509799	157939	61663	0	2.379	0	AT2G07798
chr2	3259600	3509799	157939	61663	0	2.379	0	AT2G07734
chr2	3259600	3509799	157939	61663	0	2.379	0	AT2G07714
chr4	11155400	11159599	963	376	8.75367e-123	2.37885	1.00191e-121	AT4G20840
chr4	11155400	11159599	963	376	8.75367e-123	2.37885	1.00191e-121	AT4G20830
chr5	19886200	19887199	233	91	1.77209e-31	2.37817	5.31301e-31	AT5G49060
chr4	9299800	9302799	535	209	3.05936e-69	2.37759	2.02838e-68	AT4G16500
chr4	9299800	9302799	535	209	3.05936e-69	2.37759	2.02838e-68	AT4G16510
chr1	27740800	27742399	271	106	3.85716e-36	2.37461	1.35001e-35	AT1G73760
chr1	27740800	27742399	271	106	3.85716e-36	2.37461	1.35001e-35	AT1G73770
chr5	6694800	6695799	207	81	4.10216e-28	2.37364	1.08438e-27	AT5G19820
chr1	5844200	5846199	378	148	2.10237e-49	2.37224	9.9679e-49	AT1G17090
chr1	5844200	5846199	378	148	2.10237e-49	2.37224	9.9679e-49	AT1G17100
chr1	5844200	5846199	378	148	2.10237e-49	2.37224	9.9679e-49	AT1G17110
chr5	7364000	7366599	641	251	4.27396e-82	2.37199	3.4339e-81	AT5G22220
chr5	7364000	7366599	641	251	4.27396e-82	2.37199	3.4339e-81	AT5G22240
chr5	7364000	7366599	641	251	4.27396e-82	2.37199	3.4339e-81	AT5G22250
chr5	13588000	13588999	194	76	1.97897e-26	2.37092	4.87199e-26	AT5G35360
chr5	13588000	13588999	194	76	1.97897e-26	2.37092	4.87199e-26	AT5G35370
chr5	26399000	26399999	171	67	1.50324e-23	2.37056	3.23881e-23	AT5G66005
chr5	26399000	26399999	171	67	1.50324e-23	2.37056	3.23881e-23	AT5G66010
chr1	1974000	1974799	153	60	2.8995e-21	2.36848	5.67717e-21	AT1G06475
chr1	26381600	26382799	209	82	3.1922e-28	2.36734	8.47962e-28	AT1G70040
chr1	26381600	26382799	209	82	3.1922e-28	2.36734	8.47962e-28	AT1G70050
chr1	18932600	18934599	369	145	6.04008e-48	2.36367	2.79471e-47	AT1G51090
chr1	18932600	18934599	369	145	6.04008e-48	2.36367	2.79471e-47	AT1G51100
chr3	1197400	1198999	257	101	4.4095e-34	2.36342	1.42555e-33	AT3G04485
chr1	6620800	6624799	865	340	4.32439e-109	2.36301	4.43589e-108	AT1G19180
chr1	6620800	6624799	865	340	4.32439e-109	2.36301	4.43589e-108	AT1G19190
chr2	7971600	7972599	173	68	1.16873e-23	2.36301	2.53315e-23	AT2G18350
chr5	25928600	25929399	145	57	3.55848e-20	2.36277	6.62922e-20	AT5G64860
chr2	12617400	12619399	384	151	9.88449e-50	2.36202	4.72082e-49	AT2G29410
chr2	12617400	12619399	384	151	9.88449e-50	2.36202	4.72082e-49	AT2G29420
chr5	26394200	26394999	150	59	8.95195e-21	2.36139	1.71369e-20	AT5G65980
chr5	26394200	26394999	150	59	8.95195e-21	2.36139	1.71369e-20	AT5G65990
chr1	7041000	7043599	518	204	4.62283e-66	2.35846	2.93951e-65	AT1G20340
chr1	877600	877999	99	39	2.18416e-14	2.35776	3.05455e-14	AT1G03515
chr1	877600	877999	99	39	2.18416e-14	2.35776	3.05455e-14	AT1G03520
chr4	11993600	11993999	99	39	2.18416e-14	2.35776	3.05455e-14	AT4G22840
chr4	16284800	16285399	132	52	1.74062e-18	2.35776	2.96805e-18	AT4G33980
chr2	11117800	11118399	137	54	4.37131e-19	2.35644	7.6745e-19	AT2G26100
chr3	23200800	23202999	515	203	1.4107e-65	2.35635	8.86646e-65	AT3G62720
chr2	17918800	17919799	175	69	9.07045e-24	2.35569	1.97912e-23	AT2G43090
chr5	9050400	9052199	380	150	7.16359e-49	2.353	3.37195e-48	AT5G25930
chr5	22123600	22126599	552	218	7.51082e-70	2.35186	5.03086e-69	AT5G54500
chr2	14308600	14311199	514	203	3.33526e-65	2.35178	2.07626e-64	AT2G33830
chr5	17585000	17588599	691	273	9.27017e-87	2.35095	7.7736e-86	AT5G43760
chr5	16298400	16299999	329	130	1.5367e-42	2.35061	6.35325e-42	AT5G40720
chr4	15764600	15765999	263	104	2.05686e-34	2.34883	6.74318e-34	AT4G32680
chr4	15764600	15765999	263	104	2.05686e-34	2.34883	6.74318e-34	AT4G32690
chr5	19623400	19624599	220	87	3.76702e-29	2.34873	1.03087e-28	AT5G48410
chr5	19623400	19624599	220	87	3.76702e-29	2.34873	1.03087e-28	AT5G48412
chr4	17902000	17902399	91	36	2.72045e-13	2.34784	3.62801e-13	AT4G38150
chr4	17902000	17902399	91	36	2.72045e-13	2.34784	3.62801e-13	AT4G38160
chr1	16134400	16137999	738	292	3.2144e-92	2.34748	2.90454e-91	AT1G42980
chr1	16134400	16137999	738	292	3.2144e-92	2.34748	2.90454e-91	AT1G42990
chr1	8431800	8436599	935	370	3.90706e-116	2.34714	4.23416e-115	AT1G23870
chr1	8431800	8436599	935	370	3.90706e-116	2.34714	4.23416e-115	AT1G23880
chr5	2757800	2759399	303	120	3.47545e-39	2.34526	1.32751e-38	AT5G08520
chr5	2757800	2759399	303	120	3.47545e-39	2.34526	1.32751e-38	AT5G08530
chr2	9007000	9009599	659	261	1.89648e-82	2.34517	1.52749e-81	AT2G20960
chr1	4153600	4159399	1189	471	1.104e-146	2.34471	1.41226e-145	AT1G12240
chr1	4153600	4159399	1189	471	1.104e-146	2.34471	1.41226e-145	AT1G12244
chr1	4153600	4159399	1189	471	1.104e-146	2.34471	1.41226e-145	AT1G12250
chr1	20863800	20864599	159	63	1.35227e-21	2.34415	2.68642e-21	AT1G55810
chr1	20863800	20864599	159	63	1.35227e-21	2.34415	2.68642e-21	AT1G55820
chr2	15469400	15470999	275	109	1.01946e-35	2.34334	3.49681e-35	AT2G36854
chr2	15469400	15470999	275	109	1.01946e-35	2.34334	3.49681e-35	AT2G36860
chr2	15469400	15470999	275	109	1.01946e-35	2.34334	3.49681e-35	AT2G36850
chr5	26293800	26294799	174	69	2.15764e-23	2.34223	4.61825e-23	AT5G65710
chr1	25765400	25767599	436	173	3.68854e-55	2.34083	1.92821e-54	AT1G68620
chr5	8588600	8591199	539	214	1.51858e-67	2.3394	9.84814e-67	AT5G24930
chr4	9775400	9776199	141	56	2.61796e-19	2.33862	4.65891e-19	AT4G17530
chr4	9775400	9776199	141	56	2.61796e-19	2.33862	4.65891e-19	AT4G17540
chr4	15819200	15820399	224	89	2.25208e-29	2.33769	6.25215e-29	AT4G32800
chr4	10296000	10299399	717	285	7.6869e-89	2.3367	6.5986e-88	AT4G18710
chr1	7609400	7616399	1557	619	7.02312e-190	2.33629	1.13977e-188	AT1G21670
chr1	7609400	7616399	1557	619	7.02312e-190	2.33629	1.13977e-188	AT1G21680
chr1	7609400	7616399	1557	619	7.02312e-190	2.33629	1.13977e-188	AT1G21690
chr2	2587400	2589199	332	132	2.16788e-42	2.33611	8.95142e-42	AT2G06510
chr2	2587400	2589199	332	132	2.16788e-42	2.33611	8.95142e-42	AT2G06520
chr2	2587400	2589199	332	132	2.16788e-42	2.33611	8.95142e-42	AT2G06530
chr4	6656400	6657199	166	66	2.62897e-22	2.33611	5.40031e-22	AT4G10840
chr3	19995800	19998599	503	200	5.21244e-63	2.33597	3.1487e-62	AT3G54000
chr2	11513000	11513799	143	57	2.01984e-19	2.33018	3.61819e-19	AT2G26975
chr5	2561600	2562799	198	79	5.18429e-26	2.32791	1.24714e-25	AT5G07990
chr4	16533800	16535199	238	95	8.55019e-31	2.32692	2.50365e-30	AT4G34620
chr1	171200	173599	496	198	1.12532e-61	2.32673	6.62598e-61	AT1G01470
chr1	171200	173599	496	198	1.12532e-61	2.32673	6.62598e-61	AT1G01471
chr5	4155400	4158999	776	310	5.57252e-95	2.32503	5.12044e-94	AT5G13100
chr5	4155400	4158999	776	310	5.57252e-95	2.32503	5.12044e-94	AT5G13110
chr2	18425000	18426399	245	98	1.66358e-31	2.32204	4.99226e-31	AT2G44670
chr4	13066600	13068799	557	223	1.4617e-68	2.31995	9.61303e-68	AT4G25610
chr4	13066600	13068799	557	223	1.4617e-68	2.31995	9.61303e-68	AT4G25620
chr2	18623600	18627599	834	334	2.22741e-101	2.31925	2.1433e-100	AT2G45170
chr2	18623600	18627599	834	334	2.22741e-101	2.31925	2.1433e-100	AT2G45180
chr5	25535000	25536199	222	89	1.24427e-28	2.31682	3.34609e-28	AT5G63800
chr5	4203200	4209199	1498	601	2.14275e-179	2.31508	3.297e-178	AT5G13190
chr5	4203200	4209199	1498	601	2.14275e-179	2.31508	3.297e-178	AT5G13200
chr1	30147200	30147799	132	53	7.57351e-18	2.31327	1.24835e-17	AT1G80140
chr5	832200	835199	523	210	3.82421e-64	2.31319	2.34484e-63	AT5G03380
chr5	832200	835199	523	210	3.82421e-64	2.31319	2.34484e-63	AT5G03390
chr3	23088800	23093399	866	348	1.92723e-104	2.31136	1.89928e-103	AT3G62390
chr3	23088800	23093399	866	348	1.92723e-104	2.31136	1.89928e-103	AT3G62400
chr3	23088800	23093399	866	348	1.92723e-104	2.31136	1.89928e-103	AT3G62410
chr3	23088800	23093399	866	348	1.92723e-104	2.31136	1.89928e-103	AT3G62420
chr3	23088800	23093399	866	348	1.92723e-104	2.31136	1.89928e-103	AT3G62422
chr2	19481000	19481999	169	68	3.66226e-22	2.30838	7.46644e-22	AT2G47470
chr3	6081400	6095199	3071	1236	0	2.30776	0	AT3G17770
chr3	6081400	6095199	3071	1236	0	2.30776	0	AT3G17780
chr3	6081400	6095199	3071	1236	0	2.30776	0	AT3G17790
chr3	6081400	6095199	3071	1236	0	2.30776	0	AT3G17800
chr3	6081400	6095199	3071	1236	0	2.30776	0	AT3G17810
chr4	18095800	18097999	482	194	5.1239e-59	2.30767	2.90176e-58	AT4G38770
chr4	18095800	18097999	482	194	5.1239e-59	2.30767	2.90176e-58	AT4G38760
chr5	25748000	25751799	755	304	5.3137e-91	2.30676	4.72297e-90	AT5G64395
chr5	25748000	25751799	755	304	5.3137e-91	2.30676	4.72297e-90	AT5G64400
chr5	25748000	25751799	755	304	5.3137e-91	2.30676	4.72297e-90	AT5G64401
chr5	25748000	25751799	755	304	5.3137e-91	2.30676	4.72297e-90	AT5G64410
chr1	29624800	29626199	288	116	3.83219e-36	2.30602	1.34271e-35	AT1G78790
chr1	29624800	29626199	288	116	3.83219e-36	2.30602	1.34271e-35	AT1G78800
chr5	9288600	9289199	144	58	3.65475e-19	2.30602	6.44421e-19	AT5G26742
chr2	16845200	16846199	201	81	7.1714e-26	2.30484	1.70877e-25	AT2G40330
chr3	19117200	19121599	972	392	4.67036e-116	2.30308	5.04461e-115	AT3G51540
chr3	19117200	19121599	972	392	4.67036e-116	2.30308	5.04461e-115	AT3G51550
chr4	12571600	12573999	424	171	5.48503e-52	2.30302	2.70683e-51	AT4G24240
chr4	8344400	8345599	203	82	5.49417e-26	2.29938	1.31779e-25	AT4G14540
chr3	4532200	4535999	688	278	1.51715e-82	2.29865	1.22499e-81	AT3G13790
chr3	2132600	2134599	386	156	2.448e-47	2.29822	1.11997e-46	AT3G06760
chr4	13021400	13024599	682	276	1.37447e-81	2.29511	1.0989e-80	AT4G25490
chr4	13021400	13024599	682	276	1.37447e-81	2.29511	1.0989e-80	AT4G25500
chr1	30237600	30239999	378	153	2.91292e-46	2.29472	1.30163e-45	AT1G80420
chr1	30237600	30239999	378	153	2.91292e-46	2.29472	1.30163e-45	AT1G80430
chr4	12909400	12914199	966	391	1.71892e-114	2.29472	1.84445e-113	AT4G25180
chr4	12909400	12914199	966	391	1.71892e-114	2.29472	1.84445e-113	AT4G25190
chr4	12909400	12914199	966	391	1.71892e-114	2.29472	1.84445e-113	AT4G25170
chr3	3825400	3826199	158	64	1.35091e-20	2.29301	2.56351e-20	AT3G12010
chr3	3825400	3826199	158	64	1.35091e-20	2.29301	2.56351e-20	AT3G12012
chr3	3825400	3826199	158	64	1.35091e-20	2.29301	2.56351e-20	AT3G12020
chr1	9963400	9967599	827	335	3.22951e-98	2.29292	3.03592e-97	AT1G28380
chr1	9963400	9967599	827	335	3.22951e-98	2.29292	3.03592e-97	AT1G28390
chr2	19332200	19332799	148	60	2.14087e-19	2.29108	3.82659e-19	AT2G47050
chr3	5046000	5050999	1031	418	1.31769e-121	2.29093	1.49247e-120	AT3G14990
chr3	5046000	5050999	1031	418	1.31769e-121	2.29093	1.49247e-120	AT3G15000
chr5	8326200	8326799	143	58	8.52946e-19	2.29001	1.47446e-18	AT5G24380
chr5	8326200	8326799	143	58	8.52946e-19	2.29001	1.47446e-18	AT5G24390
chr5	16449600	16451199	308	125	6.45433e-38	2.2886	2.38979e-37	AT5G41100
chr2	9537800	9539199	271	110	1.26879e-33	2.28826	4.0497e-33	AT2G22470
chr1	10013600	10014399	165	67	2.59498e-21	2.28738	5.09622e-21	AT1G28480
chr5	7785400	7786599	224	91	3.94592e-28	2.28631	1.04393e-27	AT5G23140
chr5	7785400	7786599	224	91	3.94592e-28	2.28631	1.04393e-27	AT5G23150
chr3	21294400	21300199	1131	460	2.82056e-132	2.28367	3.3457e-131	AT3G57530
chr4	18022800	18029199	1589	647	2.31176e-184	2.28112	3.64297e-183	AT4G38540
chr4	18022800	18029199	1589	647	2.31176e-184	2.28112	3.64297e-183	AT4G38545
chr4	18022800	18029199	1589	647	2.31176e-184	2.28112	3.64297e-183	AT4G38550
chr4	18022800	18029199	1589	647	2.31176e-184	2.28112	3.64297e-183	AT4G38552
chr4	18022800	18029199	1589	647	2.31176e-184	2.28112	3.64297e-183	AT4G38560
chr4	18022800	18029199	1589	647	2.31176e-184	2.28112	3.64297e-183	AT4G38530
chr4	744000	745399	206	84	7.41821e-26	2.27781	1.765e-25	AT4G01720
chr2	18907600	18914799	1518	619	1.07166e-175	2.27777	1.60355e-174	AT2G45960
chr2	18907600	18914799	1518	619	1.07166e-175	2.27777	1.60355e-174	AT2G45970
chr2	18907600	18914799	1518	619	1.07166e-175	2.27777	1.60355e-174	AT2G45950
chr1	30403000	30406599	711	290	1.38144e-83	2.2772	1.12375e-82	AT1G80910
chr1	30403000	30406599	711	290	1.38144e-83	2.2772	1.12375e-82	AT1G80920
chr1	30403000	30406599	711	290	1.38144e-83	2.2772	1.12375e-82	AT1G80930
chr3	9979600	9981799	402	164	2.84123e-48	2.27673	1.32781e-47	AT3G27050
chr3	9979600	9981799	402	164	2.84123e-48	2.27673	1.32781e-47	AT3G27060
chr5	3397800	3399999	527	215	1.50391e-62	2.27667	9.03456e-62	AT5G10745
chr5	3397800	3399999	527	215	1.50391e-62	2.27667	9.03456e-62	AT5G10750
chr5	2974800	2976199	299	122	1.76585e-36	2.27636	6.26791e-36	AT5G09585
chr5	2974800	2976199	299	122	1.76585e-36	2.27636	6.26791e-36	AT5G09590
chr1	23953000	23954399	348	142	4.42462e-42	2.27625	1.80188e-41	AT1G64500
chr1	22342800	22344199	223	91	9.09235e-28	2.27611	2.36423e-27	AT1G60660
chr1	22342800	22344199	223	91	9.09235e-28	2.27611	2.36423e-27	AT1G60670
chr5	23658000	23659399	223	91	9.09235e-28	2.27611	2.36423e-27	AT5G58520
chr1	25416800	25418599	321	131	5.5448e-39	2.27595	2.1056e-38	AT1G67785
chr1	25416800	25418599	321	131	5.5448e-39	2.27595	2.1056e-38	AT1G67790
chr1	25416800	25418599	321	131	5.5448e-39	2.27595	2.1056e-38	AT1G67792
chr4	16698400	16704999	1306	533	2.97601e-151	2.27586	3.97858e-150	AT4G35080
chr4	16698400	16704999	1306	533	2.97601e-151	2.27586	3.97858e-150	AT4G35090
chr5	26848400	26857999	2014	822	8.48248e-232	2.27571	1.65688e-230	AT5G67290
chr5	26848400	26857999	2014	822	8.48248e-232	2.27571	1.65688e-230	AT5G67300
chr5	26848400	26857999	2014	822	8.48248e-232	2.27571	1.65688e-230	AT5G67310
chr5	26848400	26857999	2014	822	8.48248e-232	2.27571	1.65688e-230	AT5G67320
chr5	96800	98399	240	98	1.11718e-29	2.27465	3.13617e-29	AT5G01240
chr4	17189200	17189999	154	63	9.48965e-20	2.27043	1.73128e-19	AT4G36380
chr4	17997600	18008199	2727	1116	4.03742611698e-311	2.2696	0	AT4G38470
chr4	17997600	18008199	2727	1116	4.03742611698e-311	2.2696	0	AT4G38490
chr4	17997600	18008199	2727	1116	4.03742611698e-311	2.2696	0	AT4G38495
chr4	17997600	18008199	2727	1116	4.03742611698e-311	2.2696	0	AT4G38500
chr4	17997600	18008199	2727	1116	4.03742611698e-311	2.2696	0	AT4G38480
chr2	17854200	17856999	537	220	3.85566e-63	2.26715	2.33342e-62	AT2G42890
chr2	17854200	17856999	537	220	3.85566e-63	2.26715	2.33342e-62	AT2G42900
chr2	17854200	17856999	537	220	3.85566e-63	2.26715	2.33342e-62	AT2G42910
chr3	2365200	2367799	488	200	1.49814e-57	2.26631	8.19954e-57	AT3G07390
chr3	2365200	2367799	488	200	1.49814e-57	2.26631	8.19954e-57	AT3G07400
chr4	17639000	17642199	505	207	1.8733e-59	2.26595	1.06831e-58	AT4G37540
chr3	19534200	19536399	422	173	4.69059e-50	2.26566	2.25342e-49	AT3G52700
chr3	19534200	19536399	422	173	4.69059e-50	2.26566	2.25342e-49	AT3G52710
chr1	27745000	27745399	100	41	1.69494e-13	2.2654	2.27902e-13	AT1G73790
chr4	15065600	15068999	646	265	2.89757e-75	2.2642	2.1288e-74	AT4G30960
chr4	16166400	16167599	234	96	1.01261e-28	2.26398	2.73212e-28	AT4G33650
chr4	16166400	16167599	234	96	1.01261e-28	2.26398	2.73212e-28	AT4G33660
chr4	16848800	16849799	190	78	1.06168e-23	2.2625	2.31343e-23	AT4G35470
chr3	5083800	5084599	151	62	2.87083e-19	2.26211	5.09225e-19	AT3G15095
chr3	5083800	5084599	151	62	2.87083e-19	2.26211	5.09225e-19	AT3G15110
chr3	9195200	9196999	302	124	2.33856e-36	2.26211	8.26029e-36	AT3G25250
chr4	14626200	14627599	302	124	2.33856e-36	2.26211	8.26029e-36	AT4G29905
chr1	21362400	21365199	560	230	2.12404e-65	2.26146	1.33243e-64	AT1G57680
chr4	7657200	7658199	221	91	4.76401e-27	2.25569	1.20094e-26	AT4G13180
chr4	10030000	10031999	318	131	6.58419e-38	2.25468	2.43511e-37	AT4G18070
chr3	3856800	3857799	182	75	1.26798e-22	2.25392	2.62781e-22	AT3G12100
chr1	23100400	23101199	165	68	1.04591e-20	2.25374	1.99402e-20	AT1G62422
chr1	11249200	11249999	148	61	8.67033e-19	2.25352	1.49723e-18	AT1G31410
chr1	11249200	11249999	148	61	8.67033e-19	2.25352	1.49723e-18	AT1G31420
chr3	3676000	3676999	211	87	7.46353e-26	2.25264	1.77449e-25	AT3G11650
chr5	6494000	6495599	308	127	1.02368e-36	2.25256	3.66951e-36	AT5G19290
chr5	6494000	6495599	308	127	1.02368e-36	2.25256	3.66951e-36	AT5G19300
chr3	8375200	8378399	686	283	7.80208e-79	2.25147	5.96028e-78	AT3G23390
chr3	8375200	8378399	686	283	7.80208e-79	2.25147	5.96028e-78	AT3G23400
chr1	3030800	3031799	184	76	9.61218e-23	2.24871	2.00351e-22	AT1G09390
chr3	18733000	18734399	276	114	5.08772e-33	2.24871	1.59272e-32	AT3G50480
chr4	12171200	12171999	184	76	9.61218e-23	2.24871	2.00351e-22	AT4G23270
chr5	1678600	1679599	184	76	9.61218e-23	2.24871	2.00351e-22	AT5G05610
chr5	1678600	1679599	184	76	9.61218e-23	2.24871	2.00351e-22	AT5G05620
chr1	20803000	20804599	266	110	7.92562e-32	2.24604	2.39827e-31	AT1G55670
chr1	20803000	20804599	266	110	7.92562e-32	2.24604	2.39827e-31	AT1G55675
chr1	20803000	20804599	266	110	7.92562e-32	2.24604	2.39827e-31	AT1G55680
chr5	2131600	2134399	532	220	2.30475e-61	2.24604	1.35461e-60	AT5G06860
chr5	2131600	2134399	532	220	2.30475e-61	2.24604	1.35461e-60	AT5G06865
chr5	2131600	2134399	532	220	2.30475e-61	2.24604	1.35461e-60	AT5G06870
chr3	6840200	6843399	797	330	1.73507e-90	2.24323	1.53799e-89	AT3G19680
chr3	6840200	6843399	797	330	1.73507e-90	2.24323	1.53799e-89	AT3G19690
chr1	3947200	3948799	263	109	2.36864e-31	2.24108	7.06909e-31	AT1G11710
chr2	19017000	19020999	615	255	3.60394e-70	2.24008	2.43902e-69	AT2G46320
chr2	19017000	19020999	615	255	3.60394e-70	2.24008	2.43902e-69	AT2G46330
chr3	9182400	9182999	123	51	8.7158e-16	2.24008	1.29881e-15	AT3G25220
chr5	3798800	3799799	176	73	1.1443e-21	2.23933	2.28161e-21	AT5G11790
chr4	17904000	17904799	159	66	9.46122e-20	2.2376	1.72706e-19	AT4G38160
chr4	17904000	17904799	159	66	9.46122e-20	2.2376	1.72706e-19	AT4G38170
chr5	26147800	26151399	619	257	2.06445e-70	2.23711	1.40005e-69	AT5G65430
chr4	18410000	18410799	171	71	4.53893e-21	2.237	8.81309e-21	AT4G39670
chr5	22331000	22332199	248	103	1.45668e-29	2.23637	4.06474e-29	AT5G55040
chr3	5337000	5338199	231	96	1.18678e-27	2.23496	3.07732e-27	AT3G15760
chr2	7576600	7577199	125	52	6.58453e-16	2.23273	9.87982e-16	AT2G17450
chr3	17494200	17495399	274	114	2.59671e-32	2.23241	7.991e-32	AT3G47470
chr3	19421600	19422599	173	72	3.42927e-21	2.23173	6.69436e-21	AT3G52380
chr4	1150600	1152199	269	112	1.02382e-31	2.23081	3.08947e-31	AT4G02620
chr4	1150600	1152199	269	112	1.02382e-31	2.23081	3.08947e-31	AT4G02630
chr3	7463200	7465199	293	122	2.42136e-34	2.23068	7.9302e-34	AT3G21250
chr3	7463200	7465199	293	122	2.42136e-34	2.23068	7.9302e-34	AT3G21260
chr4	17561400	17562799	317	132	5.74492e-37	2.23056	2.073e-36	AT4G37320
chr4	17561400	17562799	317	132	5.74492e-37	2.23056	2.073e-36	AT4G37330
chr5	8896400	8898199	372	155	6.26253e-43	2.22915	2.61232e-42	AT5G25560
chr5	18689800	18690599	168	70	1.35995e-20	2.22915	2.57916e-20	AT5G46080
chr5	23197600	23198199	132	55	1.24675e-16	2.22915	1.9311e-16	AT5G57250
chr5	19604200	19607199	667	278	4.59212e-75	2.22849	3.36618e-74	AT5G48380
chr5	18386600	18388199	247	103	3.28116e-29	2.22735	8.99424e-29	AT5G45360
chr5	15617000	15617599	139	58	2.36229e-17	2.22595	3.79035e-17	AT5G39020
chr3	294800	298599	793	331	1.66075e-88	2.22523	1.42188e-87	AT3G01830
chr3	294800	298599	793	331	1.66075e-88	2.22523	1.42188e-87	AT3G01840
chr3	294800	298599	793	331	1.66075e-88	2.22523	1.42188e-87	AT3G01820
chr3	22833600	22835399	273	114	5.83485e-32	2.22427	1.77219e-31	AT3G61690
chr3	22833600	22835399	273	114	5.83485e-32	2.22427	1.77219e-31	AT3G61700
chr4	14713400	14715399	364	152	7.30568e-42	2.22427	2.97146e-41	AT4G30097
chr4	14713400	14715399	364	152	7.30568e-42	2.22427	2.97146e-41	AT4G30100
chr2	972800	977799	1008	421	1.10589e-111	2.22386	1.17124e-110	AT2G03230
chr2	972800	977799	1008	421	1.10589e-111	2.22386	1.17124e-110	AT2G03240
chr1	28162800	28164999	419	175	8.02889e-48	2.22385	3.70442e-47	AT1G75010
chr1	28162800	28164999	419	175	8.02889e-48	2.22385	3.70442e-47	AT1G75000
chr1	7336600	7341799	895	374	2.49467e-99	2.2227	2.35873e-98	AT1G21000
chr1	29172200	29173599	227	95	7.95645e-27	2.21938	1.98425e-26	AT1G77620
chr1	29172200	29173599	227	95	7.95645e-27	2.21938	1.98425e-26	AT1G77630
chr5	19312600	19313199	129	54	3.74284e-16	2.21883	5.67076e-16	AT5G47660
chr5	20942600	20945999	461	193	4.05082e-52	2.21857	2.00512e-51	AT5G51560
chr2	14737000	14740399	826	346	2.1982e-91	2.21734	1.96992e-90	AT2G34930
chr3	2614800	2615799	179	75	1.47054e-21	2.21677	2.91605e-21	AT3G08610
chr4	13996200	13998799	539	226	2.42082e-60	2.21518	1.40511e-59	AT4G28230
chr4	13996200	13998799	539	226	2.42082e-60	2.21518	1.40511e-59	AT4G28240
chr4	8983800	8986399	460	193	9.02228e-52	2.21375	4.43901e-51	AT4G15790
chr4	8983800	8986399	460	193	9.02228e-52	2.21375	4.43901e-51	AT4G15800
chr2	15227600	15230599	450	189	1.38649e-50	2.21146	6.71028e-50	AT2G36320
chr2	16032600	16033399	150	63	2.53908e-18	2.21146	4.28478e-18	AT2G38270
chr2	7214400	7215799	269	113	3.87299e-31	2.21107	1.15061e-30	AT2G16640
chr5	3913800	3914399	119	50	5.94278e-15	2.21058	8.52103e-15	AT5G12100
chr1	3288600	3291399	671	282	3.65429e-74	2.21005	2.6141e-73	AT1G10070
chr1	3288600	3291399	671	282	3.65429e-74	2.21005	2.6141e-73	AT1G10090
chr4	15675400	15678199	532	224	4.67215e-59	2.20593	2.65053e-58	AT4G32480
chr5	5466600	5467199	133	56	2.11708e-16	2.20593	3.24527e-16	AT5G16660
chr1	5177400	5182999	1142	481	6.73762e-124	2.20521	7.76612e-123	AT1G15030
chr1	5177400	5182999	1142	481	6.73762e-124	2.20521	7.76612e-123	AT1G15040
chr1	5177400	5182999	1142	481	6.73762e-124	2.20521	7.76612e-123	AT1G15045
chr1	5177400	5182999	1142	481	6.73762e-124	2.20521	7.76612e-123	AT1G15050
chr2	9213200	9215999	470	198	2.18056e-52	2.20476	1.0843e-51	AT2G21520
chr1	27348200	27349799	242	102	4.8724e-28	2.20366	1.28486e-27	AT1G72640
chr1	27348200	27349799	242	102	4.8724e-28	2.20366	1.28486e-27	AT1G72645
chr1	27348200	27349799	242	102	4.8724e-28	2.20366	1.28486e-27	AT1G72650
chr2	12808800	12809799	185	78	6.25703e-22	2.20296	1.26537e-21	AT2G30010
chr3	3088400	3092999	801	338	2.73701e-87	2.20112	2.319e-86	AT3G10015
chr3	3088400	3092999	801	338	2.73701e-87	2.20112	2.319e-86	AT3G10020
chr3	3088400	3092999	801	338	2.73701e-87	2.20112	2.319e-86	AT3G10030
chr5	23733400	23734599	199	84	2.2631e-23	2.20041	4.83764e-23	AT5G58760
chr5	23733400	23734599	199	84	2.2631e-23	2.20041	4.83764e-23	AT5G58770
chr5	25234000	25236199	400	169	1.18464e-44	2.19838	5.13185e-44	AT5G62865
chr2	13872800	13873999	213	90	8.20029e-25	2.19819	1.87452e-24	AT2G32710
chr1	26357000	26357999	168	71	5.15138e-20	2.19776	9.52056e-20	AT1G69980
chr4	14733800	14734999	201	85	1.69894e-23	2.19637	3.64361e-23	AT4G30130
chr2	8530800	8535199	714	302	1.13435e-77	2.19594	8.5259e-77	AT2G19800
chr1	11967400	11968399	215	91	6.1544e-25	2.19445	1.41378e-24	AT1G33040
chr1	11967400	11968399	215	91	6.1544e-25	2.19445	1.41378e-24	AT1G33050
chr4	8875400	8879599	928	393	6.01342e-100	2.19323	5.70226e-99	AT4G15545
chr4	8875400	8879599	928	393	6.01342e-100	2.19323	5.70226e-99	AT4G15550
chr3	7818000	7819399	243	103	8.11504e-28	2.19128	2.1194e-27	AT3G22160
chr3	10518000	10520799	552	234	2.68108e-60	2.19105	1.55341e-59	AT3G28210
chr3	10518000	10520799	552	234	2.68108e-60	2.19105	1.55341e-59	AT3G28200
chr4	10989400	10992399	573	243	1.90151e-62	2.19017	1.1402e-61	AT4G20350
chr4	10989400	10992399	573	243	1.90151e-62	2.19017	1.1402e-61	AT4G20360
chr4	10989400	10992399	573	243	1.90151e-62	2.19017	1.1402e-61	AT4G20362
chr4	7858200	7859599	257	109	2.9529e-29	2.18996	8.12856e-29	AT4G13505
chr4	7858200	7859599	257	109	2.9529e-29	2.18996	8.12856e-29	AT4G13510
chr1	25781200	25784199	495	210	3.18822e-54	2.18935	1.64037e-53	AT1G68670
chr1	13639000	13640599	271	115	1.0758e-30	2.18877	3.13048e-30	AT1G36280
chr5	3464200	3466599	485	206	4.86852e-53	2.18677	2.45458e-52	AT5G10960
chr1	6049200	6049999	153	65	3.19161e-18	2.18629	5.34721e-18	AT1G17580
chr1	28485800	28486399	120	51	9.98351e-15	2.18545	1.41285e-14	AT1G75860
chr1	28485800	28486399	120	51	9.98351e-15	2.18545	1.41285e-14	AT1G75870
chr2	255400	257399	414	176	1.58717e-45	2.18482	6.98696e-45	AT2G01570
chr4	15485000	15486999	301	128	1.07356e-33	2.18416	3.4434e-33	AT4G32010
chr3	7913000	7919999	1458	621	1.28574e-153	2.18069	1.72596e-152	AT3G22380
chr4	16707800	16711599	753	321	2.19297e-80	2.17881	1.71958e-79	AT4G35100
chr5	18407000	18408599	274	117	1.32775e-30	2.17517	3.84988e-30	AT5G45428
chr5	18407000	18408599	274	117	1.32775e-30	2.17517	3.84988e-30	AT5G45430
chr5	26538000	26539199	213	91	3.00009e-24	2.17404	6.66187e-24	AT5G66460
chr1	26534000	26541799	1266	541	9.63913e-133	2.17353	1.14755e-131	AT1G70410
chr1	26534000	26541799	1266	541	9.63913e-133	2.17353	1.14755e-131	AT1G70420
chr4	6905200	6906599	241	103	3.93904e-27	2.17324	9.97605e-27	AT4G11355
chr4	6905200	6906599	241	103	3.93904e-27	2.17324	9.97605e-27	AT4G11360
chr1	23789000	23789599	131	56	1.05036e-15	2.17276	1.55811e-15	AT1G64090
chr1	4928200	4928999	152	65	7.06022e-18	2.172	1.16433e-17	AT1G14400
chr5	1705800	1706799	173	74	4.78688e-20	2.17142	8.86197e-20	AT5G05690
chr1	18405400	18406599	194	83	3.2675e-22	2.17096	6.67413e-22	AT1G49730
chr3	4957000	4959399	409	175	2.22709e-44	2.17077	9.59677e-44	AT3G14760
chr3	4957000	4959399	409	175	2.22709e-44	2.17077	9.59677e-44	AT3G14770
chr5	1606000	1611999	1063	455	1.89358e-111	2.16996	1.99253e-110	AT5G05435
chr5	1606000	1611999	1063	455	1.89358e-111	2.16996	1.99253e-110	AT5G05440
chr5	1606000	1611999	1063	455	1.89358e-111	2.16996	1.99253e-110	AT5G05430
chr3	21948400	21950199	320	137	3.60429e-35	2.16949	1.20835e-34	AT3G59400
chr3	21948400	21950199	320	137	3.60429e-35	2.16949	1.20835e-34	AT3G59410
chr4	11967600	11969799	355	152	9.22033e-39	2.16927	3.4811e-38	AT4G22780
chr1	27148200	27151999	752	322	1.70238e-79	2.16916	1.30971e-78	AT1G72150
chr1	487000	489999	532	228	7.99239e-57	2.16723	4.3452e-56	AT1G02400
chr1	487000	489999	532	228	7.99239e-57	2.16723	4.3452e-56	AT1G02405
chr1	21601000	21601999	182	78	6.7775e-21	2.16723	1.30663e-20	AT1G58250
chr1	25829200	25829799	126	54	4.16415e-15	2.16723	6.01304e-15	AT1G68760
chr1	25829200	25829799	126	54	4.16415e-15	2.16723	6.01304e-15	AT1G68770
chr4	13707600	13710399	527	226	3.11273e-56	2.16586	1.66182e-55	AT4G27410
chr3	10910400	10912999	443	190	1.25484e-47	2.1656	5.7815e-47	AT3G28910
chr2	7255600	7256999	303	130	2.88466e-33	2.16485	9.11799e-33	AT2G16720
chr1	25693200	25696199	529	227	2.32627e-56	2.16451	1.24807e-55	AT1G68490
chr1	28440000	28442999	505	217	9.57466e-54	2.16153	4.89538e-53	AT1G75740
chr1	28440000	28442999	505	217	9.57466e-54	2.16153	4.89538e-53	AT1G75750
chr1	18926600	18927999	221	95	9.33545e-25	2.16072	2.12507e-24	AT1G51060
chr1	18926600	18927999	221	95	9.33545e-25	2.16072	2.12507e-24	AT1G51070
chr4	12539400	12542399	572	246	1.88857e-60	2.15968	1.10206e-59	AT4G24160
chr5	15843800	15844999	232	100	9.88015e-26	2.15485	2.33713e-25	AT5G39570
chr1	29486000	29488999	559	241	8.28242e-59	2.15439	4.65815e-58	AT1G78380
chr5	23668000	23668799	167	72	4.13439e-19	2.15433	7.26246e-19	AT5G58550
chr4	12899600	12899999	109	47	3.49245e-13	2.15406	4.64615e-13	AT4G25130
chr1	29092600	29093999	248	107	2.67077e-27	2.15277	6.83298e-27	AT1G77410
chr1	29092600	29093999	248	107	2.67077e-27	2.15277	6.83298e-27	AT1G77420
chr1	28466400	28467999	234	101	7.36382e-26	2.15191	1.75334e-25	AT1G75820
chr1	27067200	27067799	176	76	5.83149e-20	2.15094	1.07653e-19	AT1G71920
chr2	16821600	16825399	699	302	1.35428e-72	2.14981	9.50037e-72	AT2G40270
chr3	633800	638399	886	383	2.95185e-91	2.14864	2.63807e-90	AT3G02875
chr3	633800	638399	886	383	2.95185e-91	2.14864	2.63807e-90	AT3G02880
chr3	633800	638399	886	383	2.95185e-91	2.14864	2.63807e-90	AT3G02885
chr5	25115200	25117599	495	214	5.06533e-52	2.14843	2.5035e-51	AT5G62575
chr5	25115200	25117599	495	214	5.06533e-52	2.14843	2.5035e-51	AT5G62570
chr1	7872600	7875399	414	179	7.08477e-44	2.14821	3.03686e-43	AT1G22275
chr1	7872600	7875399	414	179	7.08477e-44	2.14821	3.03686e-43	AT1G22280
chr1	5398600	5409999	2521	1090	7.4582e-255	2.1482	1.57978e-253	AT1G15690
chr1	5398600	5409999	2521	1090	7.4582e-255	2.1482	1.57978e-253	AT1G15700
chr1	5398600	5409999	2521	1090	7.4582e-255	2.1482	1.57978e-253	AT1G15710
chr1	5398600	5409999	2521	1090	7.4582e-255	2.1482	1.57978e-253	AT1G15730
chr1	5398600	5409999	2521	1090	7.4582e-255	2.1482	1.57978e-253	AT1G15720
chr1	25539000	25539999	185	80	8.22964e-21	2.14788	1.58098e-20	AT1G68140
chr5	23384000	23389799	1077	466	3.65584e-110	2.14664	3.78583e-109	AT5G57710
chr5	23384000	23389799	1077	466	3.65584e-110	2.14664	3.78583e-109	AT5G57720
chr1	4150400	4151999	275	119	7.65315e-30	2.14642	2.16143e-29	AT1G12230
chr2	19446000	19448799	513	222	1.03591e-53	2.14631	5.28817e-53	AT2G47390
chr2	19446000	19448799	513	222	1.03591e-53	2.14631	5.28817e-53	AT2G47400
chr2	19446000	19448799	513	222	1.03591e-53	2.14631	5.28817e-53	AT2G47410
chr1	18756400	18758599	358	155	3.92157e-38	2.14526	1.46699e-37	AT1G50640
chr1	29098600	29101399	515	223	7.71867e-54	2.14502	3.95885e-53	AT1G77450
chr2	19203800	19205599	314	136	1.07708e-33	2.14447	3.45131e-33	AT2G46735
chr2	19203800	19205599	314	136	1.07708e-33	2.14447	3.45131e-33	AT2G46740
chr3	21931400	21935399	736	319	9.17146e-76	2.14297	6.76862e-75	AT3G59340
chr3	21931400	21935399	736	319	9.17146e-76	2.14297	6.76862e-75	AT3G59350
chr3	21931400	21935399	736	319	9.17146e-76	2.14297	6.76862e-75	AT3G59360
chr1	979400	984599	964	418	2.19523e-98	2.14205	2.0696e-97	AT1G03860
chr1	979400	984599	964	418	2.19523e-98	2.14205	2.0696e-97	AT1G03870
chr1	18451800	18452799	182	79	2.40192e-20	2.1398	4.5081e-20	AT1G49840
chr1	28457400	28461999	827	359	1.55917e-84	2.13964	1.28434e-83	AT1G75790
chr1	28457400	28461999	827	359	1.55917e-84	2.13964	1.28434e-83	AT1G75810
chr1	28457400	28461999	827	359	1.55917e-84	2.13964	1.28434e-83	AT1G75800
chr5	4392200	4393399	175	76	1.26741e-19	2.13872	2.29046e-19	AT5G13640
chr5	4392200	4393399	175	76	1.26741e-19	2.13872	2.29046e-19	AT5G13630
chr4	8309200	8310599	244	106	1.68289e-26	2.13803	4.15564e-26	AT4G14450
chr4	8309200	8310599	244	106	1.68289e-26	2.13803	4.15564e-26	AT4G14455
chr3	4937000	4937999	168	73	6.69276e-19	2.13755	1.16188e-18	AT3G14690
chr4	10354800	10355999	191	83	3.38645e-21	2.13739	6.61473e-21	AT4G18890
chr3	9469800	9471199	246	107	1.25122e-26	2.1354	3.10379e-26	AT3G25882
chr3	9469800	9471199	246	107	1.25122e-26	2.1354	3.10379e-26	AT3G25880
chr1	24957200	24957999	154	67	1.87111e-17	2.13489	3.01262e-17	AT1G66890
chr1	30083400	30084399	216	94	1.28215e-23	2.1343	2.76429e-23	AT1G79970
chr1	30083400	30084399	216	94	1.28215e-23	2.1343	2.76429e-23	AT1G79980
chr1	30083400	30084399	216	94	1.28215e-23	2.1343	2.76429e-23	AT1G79990
chr2	14050800	14051799	170	74	4.97171e-19	2.13376	8.69117e-19	AT2G33150
chr4	6299200	6300399	232	101	3.44931e-25	2.13351	7.99691e-25	AT4G10070
chr4	6299200	6300399	232	101	3.44931e-25	2.13351	7.99691e-25	AT4G10080
chr5	21945400	21946999	294	128	2.47759e-31	2.13337	7.38072e-31	AT5G54070
chr5	21945400	21946999	294	128	2.47759e-31	2.13337	7.38072e-31	AT5G54075
chr5	21945400	21946999	294	128	2.47759e-31	2.13337	7.38072e-31	AT5G54080
chr3	7084800	7088199	684	298	9.29458e-70	2.13191	6.21289e-69	AT3G20310
chr3	7084800	7088199	684	298	9.29458e-70	2.13191	6.21289e-69	AT3G20320
chr1	8266600	8272599	1074	468	4.21902e-108	2.13151	4.24767e-107	AT1G23310
chr5	8557800	8559599	296	129	1.84139e-31	2.13123	5.51066e-31	AT5G24890
chr4	18555000	18559799	998	435	1.45259e-100	2.13093	1.38549e-99	AT4G40020
chr4	18555000	18559799	998	435	1.45259e-100	2.13093	1.38549e-99	AT4G40030
chr4	18555000	18559799	998	435	1.45259e-100	2.13093	1.38549e-99	AT4G40040
chr4	18555000	18559799	998	435	1.45259e-100	2.13093	1.38549e-99	AT4G40042
chr4	18555000	18559799	998	435	1.45259e-100	2.13093	1.38549e-99	AT4G40045
chr5	16973800	16975199	234	102	2.56261e-25	2.13081	5.96237e-25	AT5G42440
chr1	19913000	19913999	172	75	3.69127e-19	2.13008	6.50509e-19	AT1G53380
chr1	20647600	20648999	227	99	1.34606e-24	2.12971	3.04287e-24	AT1G55330
chr1	20647600	20648999	227	99	1.34606e-24	2.12971	3.04287e-24	AT1G55325
chr2	13971400	13972399	188	82	9.84711e-21	2.12948	1.88174e-20	AT2G32940
chr4	9928400	9930599	376	164	2.7377e-39	2.12948	1.05187e-38	AT4G17870
chr5	6182200	6183599	204	89	2.63551e-22	2.12897	5.41035e-22	AT5G18590
chr5	6182200	6183599	204	89	2.63551e-22	2.12897	5.41035e-22	AT5G18600
chr1	19856600	19858199	275	120	2.64508e-29	2.12853	7.29972e-29	AT1G53240
chr1	19856600	19858199	275	120	2.64508e-29	2.12853	7.29972e-29	AT1G53250
chr5	7647000	7647799	158	69	1.03065e-17	2.12685	1.69029e-17	AT5G22870
chr1	5889800	5891199	245	107	2.69203e-26	2.12672	6.59264e-26	AT1G17220
chr1	17090200	17091799	309	135	1.44236e-32	2.12595	4.45969e-32	AT1G45163
chr1	17090200	17091799	309	135	1.44236e-32	2.12595	4.45969e-32	AT1G45165
chr1	17090200	17091799	309	135	1.44236e-32	2.12595	4.45969e-32	AT1G45160
chr1	7974600	7978599	753	329	4.68279e-76	2.12583	3.46378e-75	AT1G22570
chr4	16310400	16312199	318	139	2.04771e-33	2.12491	6.49768e-33	AT4G34050
chr5	31200	37999	1281	560	1.67168e-127	2.12466	1.94751e-126	AT5G01090
chr5	31200	37999	1281	560	1.67168e-127	2.12466	1.94751e-126	AT5G01100
chr4	14825800	14828999	535	234	1.36902e-54	2.12357	7.11106e-54	AT4G30280
chr4	14825800	14828999	535	234	1.36902e-54	2.12357	7.11106e-54	AT4G30290
chr3	19473200	19474399	240	105	1.04851e-25	2.123	2.47486e-25	AT3G52520
chr1	5460400	5461399	169	74	1.07238e-18	2.12121	1.84693e-18	AT1G15885
chr1	5460400	5461399	169	74	1.07238e-18	2.12121	1.84693e-18	AT1G15890
chr1	6683000	6684999	322	141	1.12836e-33	2.12112	3.6121e-33	AT1G19330
chr1	6683000	6684999	322	141	1.12836e-33	2.12112	3.6121e-33	AT1G19340
chr5	17839000	17843999	950	416	7.87506e-95	2.12109	7.19564e-94	AT5G44280
chr5	17839000	17843999	950	416	7.87506e-95	2.12109	7.19564e-94	AT5G44283
chr5	17839000	17843999	950	416	7.87506e-95	2.12109	7.19564e-94	AT5G44286
chr5	17839000	17843999	950	416	7.87506e-95	2.12109	7.19564e-94	AT5G44290
chr1	7886200	7889199	484	212	1.91131e-49	2.1205	9.07524e-49	AT1G22330
chr4	6100600	6102399	324	142	8.37289e-34	2.11927	2.69087e-33	AT4G09649
chr4	6100600	6102399	324	142	8.37289e-34	2.11927	2.69087e-33	AT4G09650
chr5	8468000	8468999	187	82	2.1176e-20	2.11815	3.99052e-20	AT5G24710
chr5	8468000	8468999	187	82	2.1176e-20	2.11815	3.99052e-20	AT5G24735
chr1	29989800	29991799	301	132	1.61354e-31	2.11798	4.84655e-31	AT1G79690
chr1	29989800	29991799	301	132	1.61354e-31	2.11798	4.84655e-31	AT1G79700
chr5	26831200	26833399	497	218	1.50118e-50	2.11753	7.2546e-50	AT5G67250
chr1	9933600	9936199	501	220	8.26503e-51	2.11516	4.01198e-50	AT1G28330
chr3	16926200	16927599	255	112	6.04654e-27	2.11471	1.51605e-26	AT3G46090
chr5	18978400	18979999	305	134	8.87264e-32	2.11409	2.67987e-31	AT5G46780
chr2	15548800	15550599	264	116	8.55276e-28	2.11385	2.23014e-27	AT2G37025
chr2	15548800	15550599	264	116	8.55276e-28	2.11385	2.23014e-27	AT2G37020
chr3	20605000	20606799	330	145	3.416e-34	2.11385	1.11097e-33	AT3G55560
chr3	19509600	19511399	314	138	1.25817e-32	2.11339	3.89757e-32	AT3G52605
chr3	19509600	19511399	314	138	1.25817e-32	2.11339	3.89757e-32	AT3G52610
chr1	6148800	6150999	439	193	1.0942e-44	2.11269	4.74638e-44	AT1G17850
chr1	6148800	6150999	439	193	1.0942e-44	2.11269	4.74638e-44	AT1G17860
chr1	6148800	6150999	439	193	1.0942e-44	2.11269	4.74638e-44	AT1G17870
chr4	14858800	14860999	332	146	2.53237e-34	2.1121	8.28545e-34	AT4G30370
chr4	14858800	14860999	332	146	2.53237e-34	2.1121	8.28545e-34	AT4G30380
chr1	27382600	27384399	343	151	2.66385e-35	2.10982	8.98603e-35	AT1G72740
chr1	27382600	27384399	343	151	2.66385e-35	2.10982	8.98603e-35	AT1G72750
chr1	18377800	18379999	386	170	2.07871e-39	2.10895	8.0436e-39	AT1G49650
chr1	18377800	18379999	386	170	2.07871e-39	2.10895	8.0436e-39	AT1G49660
chr1	7175800	7179999	742	327	1.65467e-73	2.10758	1.1683e-72	AT1G20693
chr1	7175800	7179999	742	327	1.65467e-73	2.10758	1.1683e-72	AT1G20696
chr1	7175800	7179999	742	327	1.65467e-73	2.10758	1.1683e-72	AT1G20690
chr1	7175800	7179999	742	327	1.65467e-73	2.10758	1.1683e-72	AT1G20691
chr5	19668200	19670399	397	175	2.18951e-40	2.10708	8.64672e-40	AT5G48530
chr5	19668200	19670399	397	175	2.18951e-40	2.10708	8.64672e-40	AT5G48540
chr1	17846800	17848599	431	190	1.20902e-43	2.10694	5.11521e-43	AT1G48300
chr1	17846800	17848599	431	190	1.20902e-43	2.10694	5.11521e-43	AT1G48310
chr4	18075000	18078399	533	235	2.06927e-53	2.10663	1.05303e-52	AT4G38690
chr4	18075000	18078399	533	235	2.06927e-53	2.10663	1.05303e-52	AT4G38700
chr4	18075000	18078399	533	235	2.06927e-53	2.10663	1.05303e-52	AT4G38710
chr1	7373800	7374599	161	71	1.21427e-17	2.10618	1.98344e-17	AT1G21065
chr1	7373800	7374599	161	71	1.21427e-17	2.10618	1.98344e-17	AT1G21060
chr5	2027800	2028799	195	86	6.36765e-21	2.10603	1.2298e-20	AT5G06600
chr3	23356200	23357999	297	131	9.86535e-31	2.10578	2.87842e-30	AT3G63220
chr2	9844000	9844999	204	90	8.95877e-22	2.10531	1.79395e-21	AT2G23130
chr1	3071800	3072999	222	98	1.77764e-23	2.10405	3.8099e-23	AT1G09520
chr3	4924000	4927599	761	336	5.28778e-75	2.10365	3.85878e-74	AT3G14650
chr3	4924000	4927599	761	336	5.28778e-75	2.10365	3.85878e-74	AT3G14660
chr2	16010600	16012799	496	219	1.06155e-49	2.10362	5.05514e-49	AT2G38220
chr2	16010600	16012799	496	219	1.06155e-49	2.10362	5.05514e-49	AT2G38230
chr2	16010600	16012799	496	219	1.06155e-49	2.10362	5.05514e-49	AT2G38240
chr4	7846000	7847199	206	91	6.62781e-22	2.10259	1.33621e-21	AT4G13494
chr4	7846000	7847199	206	91	6.62781e-22	2.10259	1.33621e-21	AT4G13495
chr5	641800	643199	215	95	9.33267e-23	2.10205	1.94774e-22	AT5G02811
chr5	641800	643199	215	95	9.33267e-23	2.10205	1.94774e-22	AT5G02815
chr5	641800	643199	215	95	9.33267e-23	2.10205	1.94774e-22	AT5G02820
chr5	641800	643199	215	95	9.33267e-23	2.10205	1.94774e-22	AT5G02810
chr3	5358200	5359399	251	111	3.69535e-26	2.10029	8.96891e-26	AT3G15850
chr3	5358200	5359399	251	111	3.69535e-26	2.10029	8.96891e-26	AT3G15840
chr1	5075400	5078999	658	291	6.30635e-65	2.10021	3.90348e-64	AT1G14740
chr2	19086400	19090599	825	365	1.00419e-80	2.09937	7.95064e-80	AT2G46505
chr2	19086400	19090599	825	365	1.00419e-80	2.09937	7.95064e-80	AT2G46500
chr3	1033000	1035399	461	204	4.03948e-46	2.09894	1.80011e-45	AT3G03990
chr3	1033000	1035399	461	204	4.03948e-46	2.09894	1.80011e-45	AT3G03980
chr2	16561400	16563199	323	143	5.94479e-33	2.09795	1.85924e-32	AT2G39710
chr3	2128600	2130199	289	128	1.09243e-29	2.09709	3.072e-29	AT3G06750
chr1	28228600	28230999	440	195	5.68502e-44	2.09579	2.44007e-43	AT1G75210
chr1	28228600	28230999	440	195	5.68502e-44	2.09579	2.44007e-43	AT1G75220
chr2	13875000	13876799	300	133	1.14369e-30	2.09507	3.32507e-30	AT2G32710
chr2	13875000	13876799	300	133	1.14369e-30	2.09507	3.32507e-30	AT2G32720
chr5	14912600	14914199	354	157	9.27954e-36	2.09427	3.1863e-35	AT5G37540
chr2	13894400	13895999	239	106	7.49729e-25	2.09421	1.71622e-24	AT2G32765
chr2	13894400	13895999	239	106	7.49729e-25	2.09421	1.71622e-24	AT2G32770
chr2	13894400	13895999	239	106	7.49729e-25	2.09421	1.71622e-24	AT2G32760
chr2	18495200	18495999	151	67	1.851e-16	2.0933	2.84273e-16	AT2G44840
chr1	21707200	21707999	160	71	2.58711e-17	2.0931	4.1409e-17	AT1G58420
chr2	411800	413199	205	91	1.40625e-21	2.09238	2.79196e-21	AT2G01905
chr2	9207000	9210599	592	263	4.88315e-58	2.09071	2.70899e-57	AT2G21490
chr2	9207000	9210599	592	263	4.88315e-58	2.09071	2.70899e-57	AT2G21500
chr1	1157600	1158799	162	72	1.90966e-17	2.08983	3.07014e-17	AT1G04310
chr3	9827400	9828399	198	88	7.38645e-21	2.08983	1.42235e-20	AT3G26730
chr3	9827400	9828399	198	88	7.38645e-21	2.08983	1.42235e-20	AT3G26740
chr3	10204800	10208599	666	296	6.19153e-65	2.08983	3.83969e-64	AT3G27550
chr3	10204800	10208599	666	296	6.19153e-65	2.08983	3.83969e-64	AT3G27540
chr1	3157400	3159999	571	254	6.81611e-56	2.088	3.60944e-55	AT1G09750
chr1	3157400	3159999	571	254	6.81611e-56	2.088	3.60944e-55	AT1G09760
chr3	3432800	3433799	227	101	1.52039e-23	2.08753	3.27252e-23	AT3G10970
chr3	4571600	4572599	173	77	1.97282e-18	2.08682	3.35349e-18	AT3G13880
chr1	26089000	26091199	319	142	3.57279e-32	2.08656	1.08717e-31	AT1G69400
chr1	26089000	26091199	319	142	3.57279e-32	2.08656	1.08717e-31	AT1G69410
chr3	9532200	9532999	155	69	1.00781e-16	2.08647	1.56845e-16	AT3G26085
chr3	9532200	9532999	155	69	1.00781e-16	2.08647	1.56845e-16	AT3G26090
chr1	27338600	27341599	611	272	1.53968e-59	2.08642	8.79583e-59	AT1G72600
chr1	27338600	27341599	611	272	1.53968e-59	2.08642	8.79583e-59	AT1G72610
chr1	27338600	27341599	611	272	1.53968e-59	2.08642	8.79583e-59	AT1G72620
chr3	726400	729999	577	257	2.75393e-56	2.08531	1.47268e-55	AT3G03140
chr3	726400	729999	577	257	2.75393e-56	2.08531	1.47268e-55	AT3G03150
chr3	726400	729999	577	257	2.75393e-56	2.08531	1.47268e-55	AT3G03160
chr3	913400	914799	229	102	1.12249e-23	2.08528	2.44022e-23	AT3G03690
chr5	471800	473199	229	102	1.12249e-23	2.08528	2.44022e-23	AT5G02290
chr5	269800	272799	579	258	2.03548e-56	2.08443	1.09567e-55	AT5G01720
chr4	7488000	7490199	377	168	1.58741e-37	2.0843	5.81161e-37	AT4G12720
chr4	18538400	18539999	249	111	1.64816e-25	2.08356	3.85674e-25	AT4G39970
chr4	18538400	18539999	249	111	1.64816e-25	2.08356	3.85674e-25	AT4G39980
chr4	18040400	18041399	186	83	1.50512e-19	2.08144	2.70954e-19	AT4G38600
chr4	18040400	18041399	186	83	1.50512e-19	2.08144	2.70954e-19	AT4G38590
chr3	22247600	22251199	540	241	1.39687e-52	2.08116	6.98864e-52	AT3G60190
chr3	22247600	22251199	540	241	1.39687e-52	2.08116	6.98864e-52	AT3G60200
chr3	6713800	6715799	354	158	3.02915e-35	2.08101	1.01972e-34	AT3G19380
chr4	13055400	13056399	197	88	1.55834e-20	2.07928	2.95027e-20	AT4G25570
chr4	13055400	13056399	197	88	1.55834e-20	2.07928	2.95027e-20	AT4G25580
chr4	11424400	11426999	396	177	4.9506e-39	2.07803	1.88655e-38	AT4G21445
chr4	11424400	11426999	396	177	4.9506e-39	2.07803	1.88655e-38	AT4G21450
chr4	18570600	18575599	785	351	4.88745e-75	2.07726	3.57463e-74	AT4G40060
chr4	18570600	18575599	785	351	4.88745e-75	2.07726	3.57463e-74	AT4G40065
chr4	15501000	15503999	568	254	6.23455e-55	2.07703	3.25394e-54	AT4G32060
chr1	7398800	7401399	427	191	7.74211e-42	2.07646	3.14505e-41	AT1G21130
chr1	395000	396199	228	102	2.36005e-23	2.07617	5.04158e-23	AT1G02120
chr1	395000	396199	228	102	2.36005e-23	2.07617	5.04158e-23	AT1G02110
chr4	16498200	16498999	152	68	2.88993e-16	2.07617	4.40717e-16	AT4G34530
chr4	16498200	16498999	152	68	2.88993e-16	2.07617	4.40717e-16	AT4G34540
chr4	17032400	17035599	608	272	1.40467e-58	2.07617	7.85943e-58	AT4G35985
chr4	17032400	17035599	608	272	1.40467e-58	2.07617	7.85943e-58	AT4G35987
chr1	23825600	23827399	371	166	1.27618e-36	2.07584	4.55957e-36	AT1G64190
chr5	19134800	19138199	628	281	2.10999e-60	2.07578	1.22688e-59	AT5G47110
chr5	19134800	19138199	628	281	2.10999e-60	2.07578	1.22688e-59	AT5G47120
chr3	8900400	8902999	467	209	1.72643e-45	2.07539	7.58977e-45	AT3G24480
chr1	18627400	18628599	210	94	1.19071e-21	2.07501	2.37124e-21	AT1G50290
chr1	18627400	18628599	210	94	1.19071e-21	2.07501	2.37124e-21	AT1G50300
chr3	2636200	2637999	277	124	7.19102e-28	2.07485	1.88259e-27	AT3G08670
chr3	2636200	2637999	277	124	7.19102e-28	2.07485	1.88259e-27	AT3G08680
chr1	1953600	1959199	1099	492	8.86149e-104	2.07473	8.68053e-103	AT1G06410
chr1	1953600	1959199	1099	492	8.86149e-104	2.07473	8.68053e-103	AT1G06420
chr3	18760600	18761799	201	90	8.46857e-21	2.07435	1.62497e-20	AT3G50560
chr3	20754800	20756399	288	129	7.49989e-29	2.07363	2.03533e-28	AT3G55950
chr2	17731000	17734399	625	280	5.95192e-60	2.07325	3.4424e-59	AT2G42580
chr2	17731000	17734399	625	280	5.95192e-60	2.07325	3.4424e-59	AT2G42590
chr2	17731000	17734399	625	280	5.95192e-60	2.07325	3.4424e-59	AT2G42600
chr5	25416800	25417599	145	65	1.52553e-15	2.07197	2.2446e-15	AT5G63470
chr5	25416800	25417599	145	65	1.52553e-15	2.07197	2.2446e-15	AT5G63480
chr1	932800	934599	310	139	8.17048e-31	2.07146	2.40001e-30	AT1G03740
chr1	29634200	29635799	310	139	8.17048e-31	2.07146	2.40001e-30	AT1G78820
chr1	23705600	23706999	223	100	9.10315e-23	2.07126	1.90227e-22	AT1G63860
chr2	17582400	17584399	388	174	5.36849e-38	2.07115	1.99681e-37	AT2G42190
chr1	27478400	27479199	165	74	2.19003e-17	2.071	3.51741e-17	AT1G73050
chr1	27478400	27479199	165	74	2.19003e-17	2.071	3.51741e-17	AT1G73060
chr1	2150400	2153199	606	272	6.08314e-58	2.06934	3.36897e-57	AT1G07000
chr1	2150400	2153199	606	272	6.08314e-58	2.06934	3.36897e-57	AT1G07010
chr2	9526000	9528199	452	203	9.66832e-44	2.0681	4.11187e-43	AT2G22430
chr3	16669400	16669999	118	53	5.68609e-13	2.06793	7.50325e-13	AT3G45443
chr5	6456600	6458399	376	169	1.06735e-36	2.06647	3.82183e-36	AT5G19190
chr5	5999200	6000399	209	94	2.49308e-21	2.06513	4.902e-21	AT5G18140
chr5	5999200	6000399	209	94	2.49308e-21	2.06513	4.902e-21	AT5G18150
chr3	181800	185199	669	301	2.32656e-63	2.06437	1.41326e-62	AT3G01470
chr3	181800	185199	669	301	2.32656e-63	2.06437	1.41326e-62	AT3G01472
chr3	181800	185199	669	301	2.32656e-63	2.06437	1.41326e-62	AT3G01460
chr1	8428800	8430999	320	144	1.77747e-31	2.06403	5.32425e-31	AT1G23860
chr4	1228800	1230199	280	126	8.15424e-28	2.06403	2.12793e-27	AT4G02770
chr4	1228800	1230199	280	126	8.15424e-28	2.06403	2.12793e-27	AT4G02760
chr3	7092400	7094599	391	176	6.07014e-38	2.06345	2.25265e-37	AT3G20330
chr3	7092400	7094599	391	176	6.07014e-38	2.06345	2.25265e-37	AT3G20340
chr1	2445000	2446399	242	109	2.78141e-24	2.06214	6.19315e-24	AT1G07910
chr4	5636000	5640599	837	377	1.81321e-78	2.06212	1.37232e-77	AT4G08850
chr1	29116800	29117799	193	87	9.28933e-20	2.06047	1.69663e-19	AT1G77480
chr1	29116800	29117799	193	87	9.28933e-20	2.06047	1.69663e-19	AT1G77490
chr1	22444400	22447399	610	275	1.04837e-57	2.06028	5.75721e-57	AT1G60950
chr1	22444400	22447399	610	275	1.04837e-57	2.06028	5.75721e-57	AT1G60960
chr1	24251400	24252599	204	92	9.60281e-21	2.05954	1.83721e-20	AT1G65295
chr1	29345000	29347799	561	253	3.26812e-53	2.05954	1.65537e-52	AT1G78040
chr1	29345000	29347799	561	253	3.26812e-53	2.05954	1.65537e-52	AT1G78050
chr4	1041000	1042799	286	129	3.25659e-28	2.05923	8.64361e-28	AT4G02360
chr4	1041000	1042799	286	129	3.25659e-28	2.05923	8.64361e-28	AT4G02370
chr2	13916200	13919599	696	314	2.1376e-65	2.05877	1.33836e-64	AT2G32800
chr2	13916200	13919599	696	314	2.1376e-65	2.05877	1.33836e-64	AT2G32810
chr5	25921400	25923199	277	125	2.30225e-27	2.05825	5.90404e-27	AT5G64850
chr5	5260400	5264399	647	292	6.62781e-61	2.05802	3.88847e-60	AT5G16110
chr5	5289000	5290599	257	116	1.56592e-25	2.0578	3.66956e-25	AT5G16200
chr3	4831400	4833799	494	223	5.03803e-47	2.05755	2.28568e-46	AT3G14440
chr5	16184600	16186199	272	123	8.81745e-27	2.05396	2.19561e-26	AT5G40440
chr5	16184600	16186199	272	123	8.81745e-27	2.05396	2.19561e-26	AT5G40450
chr1	1142800	1144799	367	166	2.38035e-35	2.05346	8.05883e-35	AT1G04270
chr1	1142800	1144799	367	166	2.38035e-35	2.05346	8.05883e-35	AT1G04280
chr4	8303600	8305799	367	166	2.38035e-35	2.05346	8.05883e-35	AT4G14420
chr4	8303600	8305799	367	166	2.38035e-35	2.05346	8.05883e-35	AT4G14430
chr5	9983400	9984999	294	133	9.55635e-29	2.05317	2.58053e-28	AT5G27950
chr5	766400	767999	243	110	4.25167e-24	2.05184	9.37724e-24	AT5G03220
chr3	5339800	5344799	899	407	4.50362e-83	2.05161	3.64536e-82	AT3G15780
chr3	5339800	5344799	899	407	4.50362e-83	2.05161	3.64536e-82	AT3G15790
chr3	5339800	5344799	899	407	4.50362e-83	2.05161	3.64536e-82	AT3G15770
chr5	4196000	4197599	254	115	4.41466e-25	2.05147	1.01987e-24	AT5G13180
chr1	1744800	1746999	318	144	7.63982e-31	2.05113	2.2492e-30	AT1G05805
chr1	4439400	4440399	181	82	1.87444e-18	2.05019	3.19124e-18	AT1G13000
chr1	4439400	4440399	181	82	1.87444e-18	2.05019	3.19124e-18	AT1G13010
chr5	24288600	24292399	788	357	5.48767e-73	2.05016	3.85793e-72	AT5G60390
chr5	24288600	24292399	788	357	5.48767e-73	2.05016	3.85793e-72	AT5G60400
chr5	8430800	8432599	309	140	5.39004e-30	2.05003	1.53289e-29	AT5G24620
chr5	8430800	8432599	309	140	5.39004e-30	2.05003	1.53289e-29	AT5G24630
chr1	8117200	8121999	918	416	1.39728e-84	2.04964	1.15391e-83	AT1G22930
chr3	9462600	9464399	331	150	5.8639e-32	2.04958	1.77935e-31	AT3G25860
chr3	9462600	9464399	331	150	5.8639e-32	2.04958	1.77935e-31	AT3G25870
chr4	6794600	6796399	278	126	3.50917e-27	2.04929	8.90811e-27	AT4G11140
chr2	12706400	12708199	300	136	3.80418e-29	2.04885	1.0393e-28	AT2G29740
chr1	11827200	11829799	432	196	6.44587e-41	2.04718	2.56733e-40	AT1G32700
chr5	23691800	23693399	249	113	1.68958e-24	2.04668	3.79052e-24	AT5G58620
chr1	6696600	6698799	390	177	3.95121e-37	2.04654	1.43369e-36	AT1G19373
chr1	6696600	6698799	390	177	3.95121e-37	2.04654	1.43369e-36	AT1G19376
chr1	6696600	6698799	390	177	3.95121e-37	2.04654	1.43369e-36	AT1G19380
chr5	25097600	25100799	696	316	2.08589e-64	2.04574	1.28624e-63	AT5G62520
chr5	25097600	25100799	696	316	2.08589e-64	2.04574	1.28624e-63	AT5G62530
chr5	22053400	22055599	370	168	2.65852e-35	2.0456	8.97734e-35	AT5G54300
chr5	22053400	22055599	370	168	2.65852e-35	2.0456	8.97734e-35	AT5G54290
chr2	15975800	15976999	196	89	1.04321e-19	2.04548	1.89579e-19	AT2G38120
chr3	22633000	22635799	469	213	4.01408e-44	2.04514	1.72743e-43	AT3G61150
chr1	26476400	26478999	427	194	2.4505e-40	2.04435	9.66568e-40	AT1G70300
chr4	5251400	5252999	275	125	9.85372e-27	2.04339	2.44804e-26	AT4G08310
chr4	5251400	5252999	275	125	9.85372e-27	2.04339	2.44804e-26	AT4G08320
chr5	692800	695199	363	165	1.37582e-34	2.04339	4.55165e-34	AT5G02950
chr5	692800	695199	363	165	1.37582e-34	2.04339	4.55165e-34	AT5G02960
chr5	692800	695199	363	165	1.37582e-34	2.04339	4.55165e-34	AT5G02970
chr5	3996800	3997599	165	75	7.01219e-17	2.04339	1.09812e-16	AT5G12350
chr3	23036000	23041199	1005	457	1.35689e-91	2.04258	1.21933e-90	AT3G62245
chr3	23036000	23041199	1005	457	1.35689e-91	2.04258	1.21933e-90	AT3G62250
chr3	23036000	23041199	1005	457	1.35689e-91	2.04258	1.21933e-90	AT3G62260
chr3	23036000	23041199	1005	457	1.35689e-91	2.04258	1.21933e-90	AT3G62240
chr1	28366000	28367399	233	106	6.22968e-23	2.04164	1.31274e-22	AT1G75540
chr5	19045200	19047799	400	182	8.49999e-38	2.04135	3.13299e-37	AT5G46910
chr5	5121800	5122999	189	86	5.45195e-19	2.04123	9.5103e-19	AT5G15700
chr5	5121800	5122999	189	86	5.45195e-19	2.04123	9.5103e-19	AT5G15710
chr4	17553600	17556399	479	218	8.64158e-45	2.04083	3.75851e-44	AT4G37295
chr4	17553600	17556399	479	218	8.64158e-45	2.04083	3.75851e-44	AT4G37300
chr4	17553600	17556399	479	218	8.64158e-45	2.04083	3.75851e-44	AT4G37310
chr1	26743000	26746399	624	284	1.19752e-57	2.04077	6.56524e-57	AT1G70940
chr5	17385400	17386199	145	66	4.89645e-15	2.04058	7.05487e-15	AT5G43320
chr5	17385400	17386199	145	66	4.89645e-15	2.04058	7.05487e-15	AT5G43310
chr5	26568200	26570799	558	254	8.90213e-52	2.04047	4.38652e-51	AT5G66568
chr5	26568200	26570799	558	254	8.90213e-52	2.04047	4.38652e-51	AT5G66570
chr1	23082200	23084399	402	183	6.24926e-38	2.04035	2.31649e-37	AT1G62380
chr1	23082200	23084399	402	183	6.24926e-38	2.04035	2.31649e-37	AT1G62390
chr5	23952800	23954399	257	117	4.92532e-25	2.04022	1.13383e-24	AT5G59385
chr5	23952800	23954399	257	117	4.92532e-25	2.04022	1.13383e-24	AT5G59380
chr5	5493200	5494599	246	112	4.74489e-24	2.04007	1.04509e-23	AT5G16720
chr5	5493200	5494599	246	112	4.74489e-24	2.04007	1.04509e-23	AT5G16715
chr5	24958000	24959599	237	108	3.35991e-23	2.03823	7.1494e-23	AT5G62150
chr5	10862000	10864999	588	268	2.87263e-54	2.03785	1.48268e-53	AT5G28840
chr1	12458400	12459799	215	98	3.13337e-21	2.0377	6.12773e-21	AT1G34210
chr2	12624600	12625999	283	129	2.87135e-27	2.03763	7.32891e-27	AT2G29450
chr2	12624600	12625999	283	129	2.87135e-27	2.03763	7.32891e-27	AT2G29452
chr4	9824800	9825399	136	62	3.51449e-14	2.0374	4.87633e-14	AT4G17620
chr4	9824800	9825399	136	62	3.51449e-14	2.0374	4.87633e-14	AT4G17640
chr5	17256400	17257599	204	93	3.03137e-20	2.0374	5.66667e-20	AT5G43020
chr2	13276800	13278399	250	114	2.55898e-24	2.03687	5.71347e-24	AT2G31160
chr1	28218400	28220999	410	187	1.82419e-38	2.03644	6.87126e-38	AT1G75180
chr1	28218400	28220999	410	187	1.82419e-38	2.03644	6.87126e-38	AT1G75190
chr1	28218400	28220999	410	187	1.82419e-38	2.03644	6.87126e-38	AT1G75200
chr4	11929800	11931599	480	219	1.30159e-44	2.03576	5.631e-44	AT4G22690
chr2	385200	390399	962	439	5.07275e-87	2.03535	4.27579e-86	AT2G01850
chr2	385200	390399	962	439	5.07275e-87	2.03535	4.27579e-86	AT2G01860
chr2	385200	390399	962	439	5.07275e-87	2.03535	4.27579e-86	AT2G01870
chr2	18614600	18615599	195	89	2.15477e-19	2.03504	3.84933e-19	AT2G45150
chr4	17686800	17687999	184	84	2.09026e-18	2.03455	3.53836e-18	AT4G37640
chr3	20760600	20763399	449	205	8.30993e-42	2.03433	3.36733e-41	AT3G55960
chr2	9579600	9580599	173	79	2.03111e-17	2.03399	3.26379e-17	AT2G22540
chr5	20191600	20195799	740	338	2.42806e-67	2.0335	1.57149e-66	AT5G49700
chr5	20191600	20195799	740	338	2.42806e-67	2.0335	1.57149e-66	AT5G49710
chr4	10477200	10480799	683	312	2.55951e-62	2.03327	1.52635e-61	AT4G19160
chr4	10275200	10277999	464	212	4.70149e-43	2.03288	1.96871e-42	AT4G18670
chr3	5707600	5709199	221	101	1.2385e-21	2.03236	2.46342e-21	AT3G16780
chr2	12023400	12025599	361	165	5.79037e-34	2.03213	1.86642e-33	AT2G28200
chr4	15155600	15156799	175	80	1.4893e-17	2.03178	2.41337e-17	AT4G31180
chr4	15155600	15156799	175	80	1.4893e-17	2.03178	2.41337e-17	AT4G31170
chr4	9398200	9398999	153	70	1.4138e-15	2.03012	2.08302e-15	AT4G16700
chr4	9398200	9398999	153	70	1.4138e-15	2.03012	2.08302e-15	AT4G16710
chr2	6946600	6948199	271	124	5.66526e-26	2.02991	1.35683e-25	AT2G15950
chr2	6946600	6948199	271	124	5.66526e-26	2.02991	1.35683e-25	AT2G15960
chr3	4489600	4490599	177	81	1.09182e-17	2.02963	1.78791e-17	AT3G13690
chr5	5574400	5578199	686	314	2.81845e-62	2.02919	1.67464e-61	AT5G16960
chr5	5574400	5578199	686	314	2.81845e-62	2.02919	1.67464e-61	AT5G16970
chr4	15048000	15049399	332	152	2.74449e-31	2.02873	8.16092e-31	AT4G30920
chr5	2298400	2299999	249	114	5.25268e-24	2.02873	1.15538e-23	AT5G07300
chr5	2298400	2299999	249	114	5.25268e-24	2.02873	1.15538e-23	AT5G07290
chr4	16443600	16445599	441	202	8.74282e-41	2.02776	3.46947e-40	AT4G34390
chr4	16443600	16445599	441	202	8.74282e-41	2.02776	3.46947e-40	AT4G34400
chr1	9479800	9484599	895	410	2.29541e-80	2.02753	1.79559e-79	AT1G27290
chr1	9479800	9484599	895	410	2.29541e-80	2.02753	1.79559e-79	AT1G27300
chr1	9479800	9484599	895	410	2.29541e-80	2.02753	1.79559e-79	AT1G27310
chr5	25881000	25882999	299	137	2.42368e-28	2.02712	6.45391e-28	AT5G64740
chr1	265600	266799	192	88	6.04208e-19	2.0265	1.0506e-18	AT1G01710
chr2	10736600	10737799	205	94	4.57069e-20	2.02561	8.47136e-20	AT2G25200
chr3	20147600	20148399	157	72	7.58715e-16	2.02533	1.13425e-15	AT3G54430
chr3	20147600	20148399	157	72	7.58715e-16	2.02533	1.13425e-15	AT3G54440
chr3	22434800	22436399	290	133	1.70823e-27	2.02523	4.40146e-27	AT3G60690
chr4	14846800	14851599	885	406	3.25067e-79	2.02463	2.49499e-78	AT4G30350
chr3	22169200	22170199	170	78	5.70284e-17	2.02434	8.97379e-17	AT3G60030
chr1	6560600	6562999	427	196	2.31625e-39	2.02349	8.92571e-39	AT1G19000
chr1	9328600	9331199	427	196	2.31625e-39	2.02349	8.92571e-39	AT1G26920
chr1	9328600	9331199	427	196	2.31625e-39	2.02349	8.92571e-39	AT1G26921
chr1	2873200	2878999	993	456	2.27659e-88	2.02262	1.93897e-87	AT1G08930
chr1	2873200	2878999	993	456	2.27659e-88	2.02262	1.93897e-87	AT1G08940
chr5	20939600	20941799	394	181	2.02045e-36	2.02184	7.14828e-36	AT5G51550
chr3	21238200	21240799	433	199	9.15803e-40	2.02099	3.57339e-39	AT3G57400
chr3	1742600	1743399	161	74	4.06856e-16	2.0208	6.1614e-16	AT3G05840
chr2	11514800	11517599	533	245	2.0954e-48	2.02064	9.80658e-48	AT2G26980
chr5	6728800	6729999	211	97	1.79944e-20	2.02041	3.4008e-20	AT5G19900
chr4	5775000	5779599	846	389	2.116e-75	2.01999	1.5581e-74	AT4G09000
chr4	5775000	5779599	846	389	2.116e-75	2.01999	1.5581e-74	AT4G09010
chr1	56600	58799	400	184	7.9818e-37	2.01916	2.87063e-36	AT1G01115
chr1	56600	58799	400	184	7.9818e-37	2.01916	2.87063e-36	AT1G01120
chr3	18036600	18039999	689	317	9.35871e-62	2.01878	5.53046e-61	AT3G48680
chr3	18036600	18039999	689	317	9.35871e-62	2.01878	5.53046e-61	AT3G48690
chr3	18036600	18039999	689	317	9.35871e-62	2.01878	5.53046e-61	AT3G48700
chr3	3697600	3702199	802	369	1.71518e-71	2.01872	1.18788e-70	AT3G11700
chr3	3697600	3702199	802	369	1.71518e-71	2.01872	1.18788e-70	AT3G11710
chr3	9666200	9666999	163	75	2.97857e-16	2.01862	4.53811e-16	AT3G26400
chr3	556200	557599	226	104	9.99567e-22	2.01838	1.99913e-21	AT3G02610
chr2	3239200	3258599	10392	4786	0	2.01677	0	AT2G07742
chr2	3239200	3258599	10392	4786	0	2.01677	0	AT2G07771
chr2	3239200	3258599	10392	4786	0	2.01677	0	AT2G07773
chr2	3239200	3258599	10392	4786	0	2.01677	0	AT2G07671
chr2	3239200	3258599	10392	4786	0	2.01677	0	AT2G07672
chr2	3239200	3258599	10392	4786	0	2.01677	0	AT2G07743
chr2	3239200	3258599	10392	4786	0	2.01677	0	AT2G07749
chr2	3239200	3258599	10392	4786	0	2.01677	0	AT2G07776
chr2	3239200	3258599	10392	4786	0	2.01677	0	AT2G07777
chr2	3239200	3258599	10392	4786	0	2.01677	0	AT2G07779
chr1	26795400	26797199	317	146	1.4899e-29	2.01667	4.15389e-29	AT1G71030
chr1	26795400	26797199	317	146	1.4899e-29	2.01667	4.15389e-29	AT1G71040
chr1	9456400	9457799	230	106	5.36571e-22	2.01535	1.08647e-21	AT1G27210
chr1	4854400	4854999	128	59	3.81517e-13	2.01505	5.06928e-13	AT1G14200
chr5	24480200	24481199	180	83	1.20062e-17	2.0143	1.96213e-17	AT5G60850
chr4	17349800	17356799	1299	599	1.1604e-113	2.01424	1.237e-112	AT4G36830
chr4	17349800	17356799	1299	599	1.1604e-113	2.01424	1.237e-112	AT4G36840
chr4	17349800	17356799	1299	599	1.1604e-113	2.01424	1.237e-112	AT4G36850
chr1	4899000	4899999	193	89	9.05551e-19	2.01417	1.56209e-18	AT1G14345
chr1	2690800	2692199	219	101	5.18249e-21	2.01396	1.00388e-20	AT1G08510
chr3	4303200	4304799	310	143	7.68028e-29	2.01351	2.08082e-28	AT3G13290
chr3	4303200	4304799	310	143	7.68028e-29	2.01351	2.08082e-28	AT3G13300
chr2	8470000	8472599	455	210	3.03385e-41	2.01243	1.22027e-40	AT2G19572
chr2	8470000	8472599	455	210	3.03385e-41	2.01243	1.22027e-40	AT2G19580
chr2	8470000	8472599	455	210	3.03385e-41	2.01243	1.22027e-40	AT2G19570
chr3	3068600	3069599	169	78	1.16759e-16	2.01243	1.81193e-16	AT3G09980
chr5	8282200	8283599	260	120	1.66356e-24	2.01243	3.73728e-24	AT5G24318
chr2	5539000	5541599	496	229	1.01329e-44	2.01175	4.40125e-44	AT2G13360
chr1	4466400	4469199	418	193	4.90253e-38	2.01163	1.82975e-37	AT1G13110
chr1	4466400	4469199	418	193	4.90253e-38	2.01163	1.82975e-37	AT1G13120
chr3	5174800	5176199	236	109	2.10853e-22	2.01101	4.34494e-22	AT3G15356
chr3	5174800	5176199	236	109	2.10853e-22	2.01101	4.34494e-22	AT3G15351
chr4	17342600	17345599	472	218	1.25486e-42	2.01101	5.20785e-42	AT4G36800
chr4	17342600	17345599	472	218	1.25486e-42	2.01101	5.20785e-42	AT4G36808
chr4	17342600	17345599	472	218	1.25486e-42	2.01101	5.20785e-42	AT4G36810
chr4	16056200	16057199	171	79	8.54253e-17	2.01047	1.33265e-16	AT4G33320
chr4	16056200	16057199	171	79	8.54253e-17	2.01047	1.33265e-16	AT4G33300
chr4	16056200	16057199	171	79	8.54253e-17	2.01047	1.33265e-16	AT4G33310
chr5	24003600	24005199	316	146	3.02322e-29	2.01031	8.29414e-29	AT5G59570
chr4	470400	473999	738	341	2.75734e-65	2.01016	1.71978e-64	AT4G01090
chr3	19083800	19084599	145	67	1.52007e-14	2.01012	2.1382e-14	AT3G51420
chr3	22186600	22188999	383	177	5.82971e-35	2.00981	1.94642e-34	AT3G60075
chr3	22186600	22188999	383	177	5.82971e-35	2.00981	1.94642e-34	AT3G60080
chr1	29655800	29656999	199	92	3.55169e-19	2.00907	6.26927e-19	AT1G78890
chr1	29655800	29656999	199	92	3.55169e-19	2.00907	6.26927e-19	AT1G78880
chr1	29655800	29656999	199	92	3.55169e-19	2.00907	6.26927e-19	AT1G78882
chr3	19007200	19008599	279	129	4.98109e-26	2.00883	1.20091e-25	AT3G51160
chr3	4388200	4389799	253	117	8.59259e-24	2.00846	1.87988e-23	AT3G13460
chr3	4388200	4389799	253	117	8.59259e-24	2.00846	1.87988e-23	AT3G13470
chr2	13036600	13042199	962	445	3.82692e-84	2.00791	3.13654e-83	AT2G30600
chr2	13036600	13042199	962	445	3.82692e-84	2.00791	3.13654e-83	AT2G30615
chr1	1430600	1432799	441	204	7.97724e-40	2.00788	3.11638e-39	AT1G05010
chr2	11120800	11122399	268	124	4.7886e-25	2.00744	1.10392e-24	AT2G26110
chr5	15376000	15378599	404	187	1.29072e-36	2.00664	4.60647e-36	AT5G38400
chr5	15376000	15378599	404	187	1.29072e-36	2.00664	4.60647e-36	AT5G38410
chr1	6578600	6579399	149	69	8.12257e-15	2.0057	1.15601e-14	AT1G19050
chr5	7314600	7316599	380	176	1.60732e-34	2.00539	5.30138e-34	AT5G22090
chr2	17541800	17543199	205	95	1.39153e-19	2.00428	2.50921e-19	AT2G42040
chr3	23352400	23355399	533	247	1.88377e-47	2.00428	8.64257e-47	AT3G63210
chr2	18830000	18831199	192	89	1.84235e-18	2.00373	3.13824e-18	AT2G45700
chr2	18830000	18831199	192	89	1.84235e-18	2.00373	3.13824e-18	AT2G45710
chr5	26367400	26370999	576	267	4.63504e-51	2.00373	2.26001e-50	AT5G65925
chr5	26367400	26370999	576	267	4.63504e-51	2.00373	2.26001e-50	AT5G65930
chr1	6753800	6754599	151	70	5.93626e-15	2.00358	8.51543e-15	AT1G19490
chr1	5242800	5243799	166	77	3.25167e-16	2.00238	4.94496e-16	AT1G15240
chr1	5242800	5243799	166	77	3.25167e-16	2.00238	4.94496e-16	AT1G15230
chr1	5413400	5417599	683	317	6.30615e-60	2.0012	3.63439e-59	AT1G15740
chr1	5413400	5417599	683	317	6.30615e-60	2.0012	3.63439e-59	AT1G15750
chr5	15634600	15636199	265	123	1.32305e-24	2.0011	2.99707e-24	AT5G39050
chr1	10897600	10900199	549	255	1.56806e-48	1.99968	7.34916e-48	AT1G30720
chr5	4500400	4500999	127	59	7.80371e-13	1.99931	1.02314e-12	AT5G13950
chr1	12091000	12092399	226	105	3.0173e-21	1.99916	5.90428e-21	AT1G33360
chr1	12091000	12092399	226	105	3.0173e-21	1.99916	5.90428e-21	AT1G33350
chr1	21780000	21784599	1259	585	3.86468e-108	1.99894	3.90297e-107	AT1G58807
chr5	84600	86999	456	212	1.3353e-40	1.99783	5.28612e-40	AT5G01210
chr5	84600	86999	456	212	1.3353e-40	1.99783	5.28612e-40	AT5G01215
chr5	84600	86999	456	212	1.3353e-40	1.99783	5.28612e-40	AT5G01220
chr5	14629200	14630399	200	93	5.26846e-19	1.99745	9.20007e-19	AT5G37020
chr1	10375200	10380199	972	452	7.09267e-84	1.99736	5.78407e-83	AT1G29670
chr1	10375200	10380199	972	452	7.09267e-84	1.99736	5.78407e-83	AT1G29680
chr1	10375200	10380199	972	452	7.09267e-84	1.99736	5.78407e-83	AT1G29690
chr3	5644600	5646599	329	153	6.90006e-30	1.99725	1.95212e-29	AT3G16570
chr5	1518000	1523199	1004	467	1.67731e-86	1.99685	1.39933e-85	AT5G05140
chr3	4049200	4052799	733	341	9.04889e-64	1.99654	5.52761e-63	AT3G12740
chr3	4049200	4052799	733	341	9.04889e-64	1.99654	5.52761e-63	AT3G12750
chr1	4020600	4021399	144	67	3.09642e-14	1.99626	4.30726e-14	AT1G11910
chr1	2538200	2539199	174	81	9.27471e-17	1.99523	1.4448e-16	AT1G08115
chr1	2538200	2539199	174	81	9.27471e-17	1.99523	1.4448e-16	AT1G08120
chr4	16090600	16092599	348	162	2.07094e-31	1.99523	6.19195e-31	AT4G33440
chr4	16090600	16092599	348	162	2.07094e-31	1.99523	6.19195e-31	AT4G33430
chr5	26714200	26718999	979	456	4.09543e-84	1.9941	3.3482e-83	AT5G66890
chr5	26714200	26718999	979	456	4.09543e-84	1.9941	3.3482e-83	AT5G66900
chr5	26714200	26718999	979	456	4.09543e-84	1.9941	3.3482e-83	AT5G66910
chr4	10347800	10349799	397	185	1.9604e-35	1.99319	6.64741e-35	AT4G18880
chr4	8013600	8015399	281	131	1.08705e-25	1.99234	2.56396e-25	AT4G13840
chr5	17363000	17363799	148	69	1.65042e-14	1.99224	2.31855e-14	AT5G43270
chr1	24928400	24930999	403	188	7.68917e-36	1.99102	2.65419e-35	AT1G66810
chr1	24928400	24930999	403	188	7.68917e-36	1.99102	2.65419e-35	AT1G66820
chr1	24928400	24930999	403	188	7.68917e-36	1.99102	2.65419e-35	AT1G66830
chr2	14253000	14253999	180	84	3.6159e-17	1.99032	5.7593e-17	AT2G33700
chr2	16641600	16644599	480	224	3.17525e-42	1.99032	1.30121e-41	AT2G39865
chr2	16641600	16644599	480	224	3.17525e-42	1.99032	1.30121e-41	AT2G39870
chr3	3303200	3304399	195	91	1.99107e-18	1.99032	3.38274e-18	AT3G10570
chr3	3303200	3304399	195	91	1.99107e-18	1.99032	3.38274e-18	AT3G10572
chr4	16654200	16655599	240	112	3.37458e-22	1.99032	6.88854e-22	AT4G34970
chr4	16654200	16655599	240	112	3.37458e-22	1.99032	6.88854e-22	AT4G34975
chr3	2288800	2291399	512	239	7.38739e-45	1.98976	3.21731e-44	AT3G07195
chr3	2288800	2291399	512	239	7.38739e-45	1.98976	3.21731e-44	AT3G07200
chr2	17639200	17641599	377	176	1.30633e-33	1.98956	4.16544e-33	AT2G42350
chr2	17639200	17641599	377	176	1.30633e-33	1.98956	4.16544e-33	AT2G42360
chr5	23107600	23109999	362	169	2.32896e-32	1.98953	7.1738e-32	AT5G57100
chr5	23107600	23109999	362	169	2.32896e-32	1.98953	7.1738e-32	AT5G57110
chr3	18972800	18974599	287	134	4.25367e-26	1.98933	1.03087e-25	AT3G51080
chr2	19586200	19587399	197	92	1.45467e-18	1.98887	2.49481e-18	AT2G47820
chr5	1249800	1250599	152	71	8.79298e-15	1.98845	1.2487e-14	AT5G04420
chr5	1249800	1250599	152	71	8.79298e-15	1.98845	1.2487e-14	AT5G04430
chr2	2763400	2765599	396	185	3.92699e-35	1.98816	1.31383e-34	AT2G06850
chr3	14320800	14322199	214	100	5.87048e-20	1.98766	1.08312e-19	AT3G42170
chr3	5616400	5620999	830	388	5.04766e-71	1.9869	3.47372e-70	AT3G16510
chr3	5616400	5620999	830	388	5.04766e-71	1.9869	3.47372e-70	AT3G16520
chr3	2383000	2389399	1048	490	5.23607e-89	1.98653	4.50661e-88	AT3G07440
chr3	2383000	2389399	1048	490	5.23607e-89	1.98653	4.50661e-88	AT3G07450
chr3	2383000	2389399	1048	490	5.23607e-89	1.98653	4.50661e-88	AT3G07460
chr3	2383000	2389399	1048	490	5.23607e-89	1.98653	4.50661e-88	AT3G07470
chr3	2383000	2389399	1048	490	5.23607e-89	1.98653	4.50661e-88	AT3G07480
chr3	4657600	4661599	725	339	2.68895e-62	1.9864	1.60061e-61	AT3G14060
chr3	4657600	4661599	725	339	2.68895e-62	1.9864	1.60061e-61	AT3G14067
chr3	4657600	4661599	725	339	2.68895e-62	1.9864	1.60061e-61	AT3G14070
chr5	18697400	18698199	139	65	1.17775e-13	1.98623	1.59877e-13	AT5G46110
chr2	14042400	14045999	603	282	3.49794e-52	1.98608	1.73409e-51	AT2G33120
chr2	14042400	14045999	603	282	3.49794e-52	1.98608	1.73409e-51	AT2G33110
chr2	12837800	12838399	124	58	2.17309e-12	1.98574	2.7886e-12	AT2G30070
chr5	25868200	25870399	310	145	6.79273e-28	1.98574	1.78118e-27	AT5G64710
chr5	17357000	17358399	233	109	1.73594e-21	1.98545	3.42983e-21	AT5G43260
chr3	7795000	7796199	280	131	2.18104e-25	1.98525	5.08182e-25	AT3G22120
chr3	7795000	7796199	280	131	2.18104e-25	1.98525	5.08182e-25	AT3G22121
chr3	6271800	6274399	327	153	2.7773e-29	1.98511	7.65165e-29	AT3G18290
chr5	21560400	21562799	453	212	1.0717e-39	1.98468	4.16179e-39	AT5G53170
chr5	21560400	21562799	453	212	1.0717e-39	1.98468	4.16179e-39	AT5G53160
chr3	19908800	19909999	188	88	1.02855e-17	1.98428	1.68769e-17	AT3G53720
chr1	12122600	12124599	284	133	1.16561e-25	1.98333	2.74528e-25	AT1G33420
chr1	12122600	12124599	284	133	1.16561e-25	1.98333	2.74528e-25	AT1G33430
chr1	12122600	12124599	284	133	1.16561e-25	1.98333	2.74528e-25	AT1G33415
chr5	2938000	2941799	708	332	1.88149e-60	1.98072	1.09989e-59	AT5G09440
chr5	2938000	2941799	708	332	1.88149e-60	1.98072	1.09989e-59	AT5G09443
chr5	2938000	2941799	708	332	1.88149e-60	1.98072	1.09989e-59	AT5G09445
chr5	2938000	2941799	708	332	1.88149e-60	1.98072	1.09989e-59	AT5G09450
chr5	1622800	1624599	290	136	4.55209e-26	1.98056	1.09951e-25	AT5G05480
chr5	1622800	1624599	290	136	4.55209e-26	1.98056	1.09951e-25	AT5G05490
chr5	24257200	24258599	290	136	4.55209e-26	1.98056	1.09951e-25	AT5G60270
chr5	1318200	1319599	226	106	8.92317e-21	1.9803	1.70918e-20	AT5G04590
chr5	1318200	1319599	226	106	8.92317e-21	1.9803	1.70918e-20	AT5G04560
chr3	3760400	3761599	194	91	4.0029e-18	1.98011	6.68927e-18	AT3G11910
chr1	28882600	28884799	405	190	1.64256e-35	1.97984	5.58711e-35	AT1G76900
chr4	732400	733599	211	99	1.61281e-19	1.97959	2.9018e-19	AT4G01690
chr4	732400	733599	211	99	1.61281e-19	1.97959	2.9018e-19	AT4G01700
chr1	24294200	24295399	196	92	2.92212e-18	1.97878	4.91084e-18	AT1G65390
chr1	24294200	24295399	196	92	2.92212e-18	1.97878	4.91084e-18	AT1G65410
chr2	18795600	18796399	147	69	3.33152e-14	1.97878	4.62837e-14	AT2G45620
chr2	18795600	18796399	147	69	3.33152e-14	1.97878	4.62837e-14	AT2G45630
chr2	12997400	12999599	409	192	8.78493e-36	1.97857	3.01965e-35	AT2G30500
chr3	19975600	19977199	264	124	7.83138e-24	1.97748	1.71795e-23	AT3G53950
chr3	6434200	6435999	347	163	1.21274e-30	1.97729	3.52266e-30	AT3G18710
chr3	23276000	23278399	398	187	8.36189e-35	1.97683	2.78048e-34	AT3G62980
chr1	11410600	11412599	336	158	1.15719e-29	1.9752	3.2457e-29	AT1G31812
chr3	17739200	17740199	202	95	1.13632e-18	1.97495	1.95499e-18	AT3G48050
chr2	18963000	18965399	389	183	5.81924e-34	1.97436	1.87388e-33	AT2G46160
chr2	18963000	18965399	389	183	5.81924e-34	1.97436	1.87388e-33	AT2G46170
chr2	2025800	2026999	204	96	8.29308e-19	1.97373	1.43512e-18	AT2G05520
chr4	17286200	17288399	357	168	2.5302e-31	1.97373	7.53057e-31	AT4G36660
chr4	17286200	17288399	357	168	2.5302e-31	1.97373	7.53057e-31	AT4G36670
chr3	2379400	2381799	393	185	3.1095e-34	1.9731	1.01229e-33	AT3G07430
chr3	2379400	2381799	393	185	3.1095e-34	1.9731	1.01229e-33	AT3G07440
chr4	13743600	13746599	622	293	8.83533e-53	1.97175	4.43398e-52	AT4G27510
chr4	13743600	13746599	622	293	8.83533e-53	1.97175	4.43398e-52	AT4G27500
chr4	13945000	13952999	1524	718	8.02591e-126	1.97147	9.28387e-125	AT4G28060
chr4	13945000	13952999	1524	718	8.02591e-126	1.97147	9.28387e-125	AT4G28068
chr4	13945000	13952999	1524	718	8.02591e-126	1.97147	9.28387e-125	AT4G28070
chr4	13945000	13952999	1524	718	8.02591e-126	1.97147	9.28387e-125	AT4G28080
chr4	12135400	12136599	208	98	4.41648e-19	1.97136	7.74546e-19	AT4G23170
chr2	10437600	10439599	335	158	2.29929e-29	1.96932	6.3778e-29	AT2G24570
chr4	11806400	11808399	371	175	2.81604e-32	1.96909	8.6334e-32	AT4G22350
chr4	11806400	11808399	371	175	2.81604e-32	1.96909	8.6334e-32	AT4G22360
chr5	21723200	21724599	212	100	2.35151e-19	1.96909	4.19389e-19	AT5G53490
chr5	25109800	25111799	354	167	6.87377e-31	1.96886	2.0255e-30	AT5G62560
chr3	6428800	6430599	373	176	2.05762e-32	1.96845	6.35001e-32	AT3G18680
chr3	6428800	6430599	373	176	2.05762e-32	1.96845	6.35001e-32	AT3G18690
chr3	18628200	18630599	339	160	1.22706e-29	1.96793	3.43281e-29	AT3G50250
chr3	18628200	18630599	339	160	1.22706e-29	1.96793	3.43281e-29	AT3G50240
chr3	8918000	8923199	839	396	5.01534e-70	1.96787	3.38018e-69	AT3G24500
chr3	8918000	8923199	839	396	5.01534e-70	1.96787	3.38018e-69	AT3G24503
chr3	8918000	8923199	839	396	5.01534e-70	1.96787	3.38018e-69	AT3G24495
chr3	6465800	6467599	288	136	1.80407e-25	1.9669	4.21855e-25	AT3G18773
chr5	19118600	19120599	307	145	5.37012e-27	1.96652	1.34956e-26	AT5G47070
chr2	18012400	18013399	182	86	7.73977e-17	1.96563	1.20915e-16	AT2G43360
chr2	18012400	18013399	182	86	7.73977e-17	1.96563	1.20915e-16	AT2G43370
chr5	15380600	15385399	861	407	1.60633e-71	1.96489	1.11724e-70	AT5G38420
chr5	15380600	15385399	861	407	1.60633e-71	1.96489	1.11724e-70	AT5G38430
chr3	9132000	9133599	258	122	5.81498e-23	1.96421	1.22694e-22	AT3G25070
chr5	23719000	23725199	1273	602	1.75106e-104	1.96409	1.7309e-103	AT5G58710
chr5	23719000	23725199	1273	602	1.75106e-104	1.96409	1.7309e-103	AT5G58720
chr5	23719000	23725199	1273	602	1.75106e-104	1.96409	1.7309e-103	AT5G58730
chr1	28546200	28550399	704	333	8.27263e-59	1.96362	4.6647e-58	AT1G76070
chr1	28546200	28550399	704	333	8.27263e-59	1.96362	4.6647e-58	AT1G76080
chr5	23696800	23701399	704	333	8.27263e-59	1.96362	4.6647e-58	AT5G58630
chr5	23696800	23701399	704	333	8.27263e-59	1.96362	4.6647e-58	AT5G58640
chr5	23696800	23701399	704	333	8.27263e-59	1.96362	4.6647e-58	AT5G58650
chr3	2484000	2488399	820	388	4.69668e-68	1.96296	3.07026e-67	AT3G07770
chr3	2484000	2488399	820	388	4.69668e-68	1.96296	3.07026e-67	AT3G07780
chr3	2484000	2488399	820	388	4.69668e-68	1.96296	3.07026e-67	AT3G07790
chr5	19228000	19229599	281	133	9.18957e-25	1.96238	2.09332e-24	AT5G47390
chr5	19228000	19229599	281	133	9.18957e-25	1.96238	2.09332e-24	AT5G47400
chr4	13816400	13818199	338	160	2.42906e-29	1.96212	6.72061e-29	AT4G27660
chr2	10726000	10727199	226	107	2.58631e-20	1.96179	4.85138e-20	AT2G25180
chr1	30359000	30359799	154	73	1.87985e-14	1.95942	2.63632e-14	AT1G80790
chr1	30359000	30359799	154	73	1.87985e-14	1.95942	2.63632e-14	AT1G80780
chr2	16570600	16574199	675	320	3.7083e-56	1.95922	1.97655e-55	AT2G39730
chr2	17777000	17778399	232	110	1.00363e-20	1.95895	1.91565e-20	AT2G42700
chr2	17777000	17778399	232	110	1.00363e-20	1.95895	1.91565e-20	AT2G42690
chr5	24144000	24147599	563	267	3.55258e-47	1.95851	1.61625e-46	AT5G59960
chr5	24144000	24147599	563	267	3.55258e-47	1.95851	1.61625e-46	AT5G59970
chr5	24144000	24147599	563	267	3.55258e-47	1.95851	1.61625e-46	AT5G59980
chr3	19623600	19624799	196	93	8.46673e-18	1.9575	1.39276e-17	AT3G52920
chr1	2011600	2014199	472	224	7.62601e-40	1.95714	2.98274e-39	AT1G06560
chr1	2011600	2014199	472	224	7.62601e-40	1.95714	2.98274e-39	AT1G06570
chr1	2011600	2014199	472	224	7.62601e-40	1.95714	2.98274e-39	AT1G06580
chr1	13451800	13456199	708	336	1.25065e-58	1.95714	7.00966e-58	AT1G36060
chr1	13451800	13456199	708	336	1.25065e-58	1.95714	7.00966e-58	AT1G36050
chr4	15383200	15384799	295	140	1.01362e-25	1.95714	2.39423e-25	AT4G31800
chr5	25628000	25630399	442	210	2.40039e-37	1.95493	8.76826e-37	AT5G64040
[truncated: 3,414 more rows]

## Sheet: 1000 top-ranked EEN targets
Supplementary File 5: Binding sites of EIN6, EIN6-ZNF and EEN
SICER (EEN CHIP vs IgG)
1000 top-ranked EEN targets (domain at chr2 3259600-3509799 got removed from list)
Chromosome	domain start	domain end	gene name
chr3	15952000	15953199	AT3G44260
chr4	12686200	12688999	AT4G24565
chr4	12686200	12688999	AT4G24570
chr4	12686200	12688999	AT4G24580
chr4	14579600	14582999	AT4G29780
chr4	14579600	14582999	AT4G29790
chr2	16699400	16702199	AT2G39990
chr2	16699400	16702199	AT2G40000
chr2	15192400	15194399	AT2G36220
chr2	15192400	15194399	AT2G36230
chr1	9647200	9649199	AT1G27720
chr1	9647200	9649199	AT1G27730
chr2	10753600	10755399	AT2G25250
chr1	6831800	6834599	AT1G19770
chr1	6831800	6834599	AT1G19780
chr4	5740000	5741599	AT4G08950
chr5	13900200	13902999	AT5G35735
chr1	2189800	2190799	AT1G07135
chr1	29364000	29366399	AT1G78080
chr1	28766600	28767599	AT1G76650
chr1	9407000	9408799	AT1G27100
chr1	29804000	29809999	AT1G79240
chr1	2927600	2929799	AT1G09070
chr1	2927600	2929799	AT1G09080
chr3	17907400	17911999	AT3G48350
chr3	17907400	17911999	AT3G48360
chr5	20011400	20016799	AT5G49360
chr4	6863800	6866599	AT4G11280
chr1	12851600	12853399	AT1G35140
chr1	22034000	22040599	AT1G59870
chr2	8911400	8913799	AT2G20670
chr3	17974600	17976999	AT3G48515
chr3	17974600	17976999	AT3G48520
chr4	522400	524399	AT4G01250
chr3	20549200	20553999	AT3G55430
chr3	20549200	20553999	AT3G55440
chr5	24102600	24104199	AT5G59820
chr1	14158400	14162199	AT1G37130
chr5	25332800	25337199	AT5G63160
chr1	30240800	30244999	AT1G80440
chr1	30240800	30244999	AT1G80450
chr3	21059000	21061199	AT3G56880
chr4	7756400	7761599	AT4G13340
chr3	20774000	20779599	AT3G55980
chr3	4078200	4079799	AT3G12830
chr2	7754400	7757999	AT2G17830
chr2	7754400	7757999	AT2G17840
chr2	19557600	19559999	AT2G47730
chr2	19557600	19559999	AT2G47740
chr1	24647200	24648799	AT1G66180
chr4	2716800	2720599	AT4G05330
chr4	2716800	2720599	AT4G05320
chr2	16108400	16110999	AT2G38470
chr2	16108400	16110999	AT2G38480
chr2	12813400	12817799	AT2G30020
chr3	9721200	9723799	AT3G26520
chr5	1215800	1217599	AT5G04340
chr4	2587400	2589599	AT4G05050
chr4	7785000	7786199	AT4G13390
chr4	7785000	7786199	AT4G13395
chr4	9752600	9753999	AT4G17490
chr5	5718600	5720599	AT5G17350
chr5	5718600	5720599	AT5G17360
chr2	15081000	15084799	AT2G35930
chr3	19568000	19570999	AT3G52800
chr3	19568000	19570999	AT3G52810
chr1	8910000	8912599	AT1G25400
chr5	6831600	6837999	AT5G20250
chr5	6831600	6837999	AT5G20260
chr4	16451800	16454799	AT4G34410
chr4	16451800	16454799	AT4G34412
chr4	16451800	16454799	AT4G34415
chr2	13554000	13557399	AT2G31880
chr2	13554000	13557399	AT2G31890
chr5	26602800	26604399	AT5G66650
chr1	30260600	30260999	AT1G80480
chr1	30260600	30260999	AT1G80490
chr4	17048600	17050799	AT4G36040
chr1	6462600	6466999	AT1G18740
chr1	6462600	6466999	AT1G18745
chr1	6462600	6466999	AT1G18750
chr1	6626600	6628199	AT1G19210
chr1	6626600	6628199	AT1G19220
chr1	27308200	27313199	AT1G72530
chr1	27308200	27313199	AT1G72520
chr3	5121200	5127199	AT3G15210
chr3	5121200	5127199	AT3G15220
chr1	28745800	28748199	AT1G76600
chr5	8300200	8300799	AT5G24340
chr1	267600	271799	AT1G01710
chr1	267600	271799	AT1G01720
chr1	267600	271799	AT1G01725
chr1	267600	271799	AT1G01730
chr1	28143800	28146799	AT1G74929
chr1	28143800	28146799	AT1G74930
chr1	28143800	28146799	AT1G74940
chr4	15487800	15494599	AT4G32020
chr4	15487800	15494599	AT4G32030
chr4	15487800	15494599	AT4G32040
chr1	28586200	28587999	AT1G76170
chr1	28586200	28587999	AT1G76180
chr4	13809600	13814599	AT4G27652
chr4	13809600	13814599	AT4G27657
chr4	13809600	13814599	AT4G27654
chr1	29636600	29638599	AT1G78830
chr1	30383600	30388399	AT1G80840
chr1	30383600	30388399	AT1G80850
chr1	30383600	30388399	AT1G80860
chr3	507400	511799	AT3G02468
chr3	507400	511799	AT3G02470
chr3	507400	511799	AT3G02460
chr5	6470000	6472999	AT5G19240
chr5	6470000	6472999	AT5G19250
chr1	27643800	27647199	AT1G73530
chr1	27643800	27647199	AT1G73540
chr5	16814800	16819199	AT5G42050
chr5	16814800	16819199	AT5G42053
chr5	16814800	16819199	AT5G42060
chr5	16814800	16819199	AT5G42070
chr2	14219000	14222199	AT2G33570
chr2	14219000	14222199	AT2G33580
chr3	17438000	17441399	AT3G47340
chr2	17111000	17115399	AT2G41000
chr2	17111000	17115399	AT2G41010
chr2	17111000	17115399	AT2G41997
chr2	13658800	13661599	AT2G32150
chr3	4309600	4313599	AT3G13310
chr3	4309600	4313599	AT3G13300
chr2	11683400	11684999	AT2G27310
chr2	13824200	13824799	AT2G32560
chr4	13749000	13751999	AT4G27510
chr4	13749000	13751999	AT4G27520
chr1	7835200	7837799	AT1G22190
chr1	7835200	7837799	AT1G22200
chr1	27639000	27640599	AT1G73500
chr2	16771600	16774799	AT2G40140
chr4	13663200	13664599	AT4G27270
chr4	13663200	13664599	AT4G27280
chr5	14750200	14753399	AT5G37250
chr5	14750200	14753399	AT5G37260
chr1	3776600	3782399	AT1G11260
chr1	3776600	3782399	AT1G11270
chr3	22141800	22145199	AT3G59940
chr3	22141800	22145199	AT3G59950
chr5	3524200	3527599	AT5G11090
chr3	9307400	9307799	AT3G25600
chr4	14818400	14821799	AT4G30260
chr4	14818400	14821799	AT4G30270
chr1	23689800	23690599	AT1G63840
chr5	24063400	24066399	AT5G59730
chr5	24063400	24066399	AT5G59732
chr5	6414200	6416399	AT5G19120
chr5	6414200	6416399	AT5G19130
chr2	18253600	18257999	AT2G44130
chr2	18253600	18257999	AT2G44140
chr2	10829800	10831599	AT2G25450
chr4	11172200	11175399	AT4G20870
chr4	11172200	11175399	AT4G20860
chr3	20295400	20299599	AT3G54810
chr1	7238600	7239599	AT1G20823
chr1	8384600	8386799	AT1G23710
chr3	5692600	5694999	AT3G16720
chr1	23890400	23891999	AT1G64380
chr3	12447400	12451399	AT3G30770
chr3	12447400	12451399	AT3G30775
chr5	24217600	24218199	AT5G60142
chr5	24217600	24218199	AT5G60150
chr5	3513000	3517199	AT5G11060
chr5	3513000	3517199	AT5G11070
chr5	8773400	8778399	AT5G25280
chr5	1928400	1931999	AT5G06310
chr5	1928400	1931999	AT5G06320
chr5	25697600	25706599	AT5G64250
chr5	25697600	25706599	AT5G64260
chr5	19180000	19181199	AT5G47230
chr1	11798200	11801199	AT1G32630
chr1	11798200	11801199	AT1G32640
chr1	21440400	21443799	AT1G57980
chr1	21440400	21443799	AT1G57990
chr5	19397200	19401799	AT5G47910
chr3	19440600	19442799	AT3G52450
chr5	25518200	25524199	AT5G63770
chr5	25518200	25524199	AT5G63780
chr3	23324200	23324799	AT3G63120
chr3	23324200	23324799	AT3G63130
chr1	7104400	7106199	AT1G20510
chr1	7104400	7106199	AT1G20515
chr1	10420400	10420799	AT1G29750
chr1	27982000	27985199	AT1G74448
chr1	27982000	27985199	AT1G74453
chr1	27982000	27985199	AT1G74456
chr1	27982000	27985199	AT1G74450
chr5	20070800	20071599	AT5G49480
chr5	25525000	25528399	AT5G63790
chr5	25525000	25528399	AT5G63780
chr1	22866000	22871199	AT1G61870
chr1	22866000	22871199	AT1G61880
chr1	22866000	22871199	AT1G61890
chr2	17137000	17142599	AT2G41100
chr2	17137000	17142599	AT2G41110
chr2	17137000	17142599	AT2G41120
chr1	25877400	25882599	AT1G68840
chr1	25877400	25882599	AT1G68845
chr1	9671000	9675999	AT1G27760
chr1	9671000	9675999	AT1G27770
chr3	6704200	6704799	AT3G19340
chr1	20728000	20728399	AT1G55525
chr1	20728000	20728399	AT1G55520
chr3	18437600	18442399	AT3G49710
chr3	18437600	18442399	AT3G49720
chr3	18437600	18442399	AT3G49725
chr3	7194800	7195599	AT3G20600
chr3	618200	619999	AT3G02840
chr3	618200	619999	AT3G02850
chr4	16352000	16358199	AT4G34150
chr4	16352000	16358199	AT4G34160
chr4	16352000	16358199	AT4G34140
chr1	12180600	12182399	AT1G33600
chr5	23056200	23057799	AT5G56980
chr3	5210600	5216599	AT3G15440
chr3	5210600	5216599	AT3G15450
chr3	5210600	5216599	AT3G15460
chr3	5210600	5216599	AT3G15470
chr3	5210600	5216599	AT3G15430
chr1	6298800	6302599	AT1G18300
chr1	6298800	6302599	AT1G18310
chr1	18807800	18812599	AT1G50750
chr1	18807800	18812599	AT1G50740
chr5	22603200	22603599	AT5G55850
chr2	19100000	19101399	AT2G46520
chr5	26903600	26907199	AT5G67420
chr1	3995000	3995399	AT1G11840
chr5	18368600	18371199	AT5G45340
chr5	1601000	1604399	AT5G05410
chr5	1601000	1604399	AT5G05420
chr2	7767000	7767999	AT2G17880
chr5	16441600	16444999	AT5G41080
chr5	23995400	24001999	AT5G59530
chr5	23995400	24001999	AT5G59540
chr5	23995400	24001999	AT5G59550
chr5	23995400	24001999	AT5G59560
chr5	289800	291799	AT5G01750
chr5	289800	291799	AT5G01760
chr3	17177600	17183399	AT3G46620
chr3	17177600	17183399	AT3G46630
chr3	17177600	17183399	AT3G46640
chr1	6265600	6268799	AT1G18200
chr1	6265600	6268799	AT1G18210
chr1	24636200	24639399	AT1G66160
chr1	24636200	24639399	AT1G66170
chr2	2269200	2272599	AT2G05920
chr4	9759000	9760399	AT4G17500
chr5	6825600	6827999	AT5G20220
chr5	6825600	6827999	AT5G20225
chr5	6825600	6827999	AT5G20230
chr1	206600	207199	AT1G01570
chr2	17267600	17271199	AT2G41420
chr2	17267600	17271199	AT2G41430
chr2	17267600	17271199	AT2G41440
chr5	8889400	8889999	AT5G25520
chr5	8889400	8889999	AT5G25530
chr5	20371600	20371999	AT5G50100
chr1	787000	788999	AT1G03220
chr3	4907800	4908199	AT3G14590
chr3	6803000	6805599	AT3G19580
chr4	14534800	14537399	AT4G29660
chr4	14534800	14537399	AT4G29670
chr5	23306200	23311799	AT5G57550
chr5	23306200	23311799	AT5G57560
chr5	23306200	23311799	AT5G57565
chr1	8060600	8061199	AT1G22767
chr4	16560200	16563399	AT4G34710
chr1	26322600	26325199	AT1G69880
chr1	26322600	26325199	AT1G69890
chr1	8308600	8310599	AT1G23390
chr5	25037400	25039199	AT5G62350
chr3	7278800	7282799	AT3G20820
chr4	18052800	18055599	AT4G38620
chr1	3180200	3180799	AT1G09800
chr3	22650000	22651599	AT3G61190
chr2	12820600	12823599	AT2G30040
chr2	11146800	11150799	AT2G26190
chr4	14246000	14246399	AT4G28860
chr1	1477600	1479999	AT1G05136
chr1	22053600	22057799	AT1G59910
chr1	22053600	22057799	AT1G59900
chr5	2150400	2151199	AT5G06940
chr5	2150400	2151199	AT5G06950
chr1	21758600	21759399	AT1G58602
chr5	4262200	4262799	AT5G13300
chr1	571200	575599	AT1G02660
chr1	6061800	6063399	AT1G17620
chr3	8404400	8405199	AT3G23440
chr3	5296000	5299199	AT3G15620
chr3	5296000	5299199	AT3G15630
chr3	5296000	5299199	AT3G15640
chr1	5976800	5981599	AT1G17420
chr3	8641400	8644599	AT3G23920
chr1	26415000	26415599	AT1G70140
chr4	7180000	7180599	AT4G11970
chr1	21237800	21242199	AT1G56660
chr1	21237800	21242199	AT1G56670
chr1	12177400	12179399	AT1G33590
chr4	18432600	18433999	AT4G39730
chr2	10832400	10835799	AT2G25460
chr2	296200	298199	AT2G01670
chr1	11115000	11115999	AT1G31130
chr3	1477200	1479799	AT3G05200
chr3	1477200	1479799	AT3G05210
chr2	11282200	11284999	AT2G26530
chr3	3923200	3923799	AT3G12320
chr1	24901600	24904599	AT1G66760
chr3	8960200	8963999	AT3G24560
chr3	8960200	8963999	AT3G24550
chr1	11927200	11933199	AT1G32920
chr1	11927200	11933199	AT1G32928
chr1	11927200	11933199	AT1G32930
chr5	21138800	21140799	AT5G52050
chr3	3186000	3188399	AT3G10300
chr5	8416200	8419199	AT5G24590
chr5	24764000	24767999	AT5G61580
chr5	24764000	24767999	AT5G61590
chr5	24764000	24767999	AT5G61600
chr1	2187400	2188799	AT1G07128
chr1	2187400	2188799	AT1G07130
chr2	428400	429199	AT2G01930
chr5	9800	16399	AT5G01030
chr5	9800	16399	AT5G01040
chr1	3663800	3664999	AT1G10950
chr1	3663800	3664999	AT1G10960
chr1	10715400	10719599	AT1G30360
chr1	10715400	10719599	AT1G30370
chr2	17330600	17331599	AT2G41550
chr1	4525400	4526399	AT1G13245
chr5	5360600	5360999	AT5G16380
chr5	5360600	5360999	AT5G16390
chr2	9562400	9564799	AT2G22500
chr2	11566200	11569799	AT2G27090
chr2	11566200	11569799	AT2G27080
chr1	7696400	7698199	AT1G21910
chr5	18505600	18506199	AT5G45630
chr1	9956200	9956999	AT1G28370
chr1	20704800	20707399	AT1G55450
chr4	17539800	17543199	AT4G37260
chr4	17539800	17543199	AT4G37270
chr1	24811200	24812799	AT1G66500
chr1	6802600	6803399	AT1G19660
chr4	13015000	13016599	AT4G25470
chr3	20895800	20898199	AT3G56360
chr1	7346200	7346999	AT1G21010
chr1	1028000	1029399	AT1G04000
chr3	7103600	7104599	AT3G20362
chr3	7103600	7104599	AT3G20365
chr3	19138600	19139599	AT3G51600
chr3	19138600	19139599	AT3G51610
chr5	5355000	5359199	AT5G16350
chr5	5355000	5359199	AT5G16360
chr5	5355000	5359199	AT5G16375
chr5	5355000	5359199	AT5G16370
chr3	3441600	3444399	AT3G10985
chr3	3441600	3444399	AT3G10986
chr1	20100400	20103999	AT1G53830
chr1	20100400	20103999	AT1G53850
chr1	20100400	20103999	AT1G53840
chr3	18361200	18365199	AT3G49530
chr5	17730000	17731799	AT5G44060
chr5	2533200	2533799	AT5G07940
chr2	11750400	11755199	AT2G27500
chr3	1431400	1431999	AT3G05120
chr2	14573200	14574199	AT2G34600
chr2	9924800	9926599	AT2G23320
chr2	9924800	9926599	AT2G23321
chr1	21169800	21172599	AT1G56510
chr4	8010600	8012799	AT4G13820
chr4	8010600	8012799	AT4G13830
chr2	17262000	17262799	AT2G41410
chr1	290800	291599	AT1G01790
chr1	8981600	8984199	AT1G25560
chr3	9867400	9867999	AT3G26810
chr5	22777200	22777799	AT5G56260
chr5	7245200	7253399	AT5G21930
chr5	7245200	7253399	AT5G21940
chr3	6562800	6565999	AT3G19030
chr3	6562800	6565999	AT3G19035
chr2	7898000	7899399	AT2G18160
chr2	7898000	7899399	AT2G18162
chr1	24602200	24602799	AT1G66090
chr1	5390000	5391399	AT1G15670
chr5	22894400	22897999	AT5G56550
chr5	23620600	23624599	AT5G58420
chr5	23620600	23624599	AT5G58430
chr5	23620600	23624599	AT5G58440
chr1	23541400	23542399	AT1G63480
chr4	5792000	5793199	AT4G09030
chr5	8284400	8285399	AT5G24320
chr3	18465600	18470199	AT3G49780
chr3	18465600	18470199	AT3G49790
chr2	10975200	10976399	AT2G25735
chr5	24386000	24389599	AT5G60680
chr2	9739400	9742599	AT2G22870
chr2	9739400	9742599	AT2G22880
chr2	9739400	9742599	AT2G22890
chr3	8267200	8268799	AT3G23170
chr3	9708600	9712799	AT3G26500
chr3	9708600	9712799	AT3G26510
chr4	16852000	16852999	AT4G35480
chr4	17279600	17285399	AT4G36648
chr4	17279600	17285399	AT4G36650
chr2	15515200	15516999	AT2G36950
chr3	6663000	6667999	AT3G19230
chr3	6663000	6667999	AT3G19235
chr3	6663000	6667999	AT3G19240
chr3	6663000	6667999	AT3G19250
chr1	4540600	4543799	AT1G13260
chr5	9684000	9685599	AT5G27420
chr3	19371000	19371799	AT3G52220
chr3	19371000	19371799	AT3G52230
chr1	28776000	28780399	AT1G76680
chr1	28776000	28780399	AT1G76690
chr5	26051600	26053399	AT5G65205
chr5	26051600	26053399	AT5G65207
chr4	8972400	8974799	AT4G15760
chr3	1526200	1527199	AT3G05350
chr2	11041800	11042999	AT2G25900
chr4	13380200	13380799	AT4G26488
chr4	13380200	13380799	AT4G26490
chr1	30302200	30304199	AT1G80610
chr3	19425600	19427599	AT3G52400
chr4	15024200	15024599	AT4G30860
chr1	25656800	25659599	AT1G68440
chr4	16939200	16947199	AT4G35740
chr4	16939200	16947199	AT4G35760
chr4	16939200	16947199	AT4G35770
chr4	16939200	16947199	AT4G35780
chr4	16939200	16947199	AT4G35750
chr1	21167200	21168399	AT1G56500
chr1	21167200	21168399	AT1G56510
chr3	18514400	18516999	AT3G49940
chr5	22961800	22962599	AT5G56760
chr2	10846800	10850799	AT2G25490
chr4	7787000	7787799	AT4G13400
chr4	807200	810799	AT4G01865
chr4	807200	810799	AT4G01870
chr4	807200	810799	AT4G01880
chr4	807200	810799	AT4G01860
chr3	16896000	16898199	AT3G45970
chr3	16896000	16898199	AT3G45980
chr1	30215800	30220599	AT1G80370
chr1	30215800	30220599	AT1G80380
chr2	12148400	12149199	AT2G28400
chr3	5347800	5349399	AT3G15810
chr1	182200	183599	AT1G01490
chr1	930800	931999	AT1G03730
chr2	13185400	13186199	AT2G30980
chr4	1046000	1047999	AT4G02380
chr2	14861200	14862199	AT2G35290
chr3	10045200	10045999	AT3G27210
chr2	6917000	6920199	AT2G15880
chr3	3354600	3357999	AT3G10720
chr3	1047200	1047799	AT3G04040
chr1	21887800	21888799	AT1G59590
chr3	5252200	5254799	AT3G15520
chr3	5252200	5254799	AT3G15530
chr1	29387600	29389199	AT1G78100
chr5	4074000	4074599	AT5G12900
chr1	29898000	29899599	AT1G79480
chr2	2033600	2034599	AT2G05540
chr1	7083600	7085799	AT1G20430
chr1	7083600	7085799	AT1G20440
chr2	9840600	9842999	AT2G23110
chr2	9840600	9842999	AT2G23118
chr2	9840600	9842999	AT2G23120
chr5	24713200	24713799	AT5G61455
chr4	841400	846799	AT4G01935
chr4	841400	846799	AT4G01940
chr4	841400	846799	AT4G01950
chr1	6213400	6213999	AT1G18060
chr1	6213400	6213999	AT1G18070
chr3	21261200	21263599	AT3G57450
chr3	21261200	21263599	AT3G57460
chr1	2759400	2760399	AT1G08660
chr1	2759400	2760399	AT1G08670
chr1	7570600	7571799	AT1G21600
chr3	87400	89399	AT3G01280
chr3	87400	89399	AT3G01290
chr2	12834800	12835399	AT2G30070
chr4	17669200	17674999	AT4G37608
chr4	17669200	17674999	AT4G37610
chr5	2354000	2359199	AT5G07430
chr5	2354000	2359199	AT5G07440
chr5	2354000	2359199	AT5G07450
chr1	11749800	11750199	AT1G32500
chr2	106600	109799	AT2G01180
chr3	5351200	5352599	AT3G15820
chr5	771600	774599	AT5G03240
chr5	771600	774599	AT5G03250
chr1	5773200	5773799	AT1G16870
chr1	5773200	5773799	AT1G16880
chr5	14998000	14999799	AT5G37760
chr5	14998000	14999799	AT5G37770
chr1	5171000	5172599	AT1G15010
chr1	5171000	5172599	AT1G15015
chr3	22602800	22607999	AT3G61060
chr3	22602800	22607999	AT3G61070
chr3	22602800	22607999	AT3G61080
chr4	298800	300999	AT4G00730
chr1	21042800	21044999	AT1G56220
chr5	7524200	7525999	AT5G22630
chr1	7265200	7266199	AT1G20880
chr1	7265200	7266199	AT1G20890
chr5	25718200	25723399	AT5G64300
chr5	25718200	25723399	AT5G64310
chr5	25718200	25723399	AT5G64320
chr2	10135000	10137599	AT2G23810
chr3	2408400	2409599	AT3G07550
chr5	21607000	21607599	AT5G53270
chr5	21607000	21607599	AT5G53280
chr4	14880000	14883399	AT4G30430
chr4	14880000	14883399	AT4G30440
chr1	24127600	24129199	AT1G64950
chr4	747600	748199	AT4G01720
chr5	9648400	9648999	AT5G27350
chr3	21288200	21293199	AT3G57520
chr1	20430200	20433199	AT1G54740
chr2	13002600	13006999	AT2G30520
chr5	973400	974599	AT5G03720
chr5	973400	974599	AT5G03730
chr3	1592600	1595599	AT3G05500
chr3	1592600	1595599	AT3G05510
chr3	5504600	5507599	AT3G16240
chr3	5504600	5507599	AT3G16250
chr2	17885800	17886799	AT2G43010
chr1	2436800	2440399	AT1G07885
chr1	2436800	2440399	AT1G07890
chr1	19915400	19916999	AT1G53380
chr1	26239600	26240799	AT1G69760
chr3	10587400	10590799	AT3G28330
chr3	10587400	10590799	AT3G28340
chr5	261000	268599	AT5G01710
chr5	261000	268599	AT5G01712
chr5	261000	268599	AT5G01720
chr5	261000	268599	AT5G01700
chr2	14173200	14173799	AT2G33450
chr2	14173200	14173799	AT2G33440
chr4	15130000	15130599	AT4G31110
chr4	15130000	15130599	AT4G31115
chr3	561600	562199	AT3G02620
chr3	561600	562199	AT3G02630
chr2	2287200	2289399	AT2G05940
chr5	229200	231199	AT5G01610
chr5	229200	231199	AT5G01595
chr5	229200	231199	AT5G01600
chr2	220400	221399	AT2G01480
chr2	220400	221399	AT2G01490
chr2	17701200	17701799	AT2G42500
chr2	17701200	17701799	AT2G42510
chr2	8122200	8123199	AT2G18735
chr2	8122200	8123199	AT2G18740
chr3	2347400	2349199	AT3G07350
chr2	18817400	18823199	AT2G45670
chr2	18817400	18823199	AT2G45680
chr2	18817400	18823199	AT2G45685
chr2	18817400	18823199	AT2G45690
chr1	29235600	29239599	AT1G77760
chr2	7994400	7997599	AT2G18420
chr2	7994400	7997599	AT2G18450
chr2	7994400	7997599	AT2G18440
chr3	1287200	1292199	AT3G04730
chr3	1287200	1292199	AT3G04732
chr4	17225400	17226999	AT4G36500
chr5	3283600	3286599	AT5G10450
chr1	25047200	25050199	AT1G67090
chr1	5699600	5703199	AT1G16670
chr1	5699600	5703199	AT1G16680
chr1	26814800	26816599	AT1G71100
chr1	2177400	2178599	AT1G07100
chr1	2177400	2178599	AT1G07110
chr1	11609600	11612399	AT1G32220
chr1	11609600	11612399	AT1G32225
chr1	11609600	11612399	AT1G32230
chr1	25229800	25232999	AT1G67340
chr1	1660600	1662399	AT1G05575
chr1	1660600	1662399	AT1G05577
chr1	11738200	11740399	AT1G32460
chr1	11738200	11740399	AT1G32470
chr3	6551200	6551999	AT3G18990
chr3	22809400	22810799	AT3G61640
chr3	8685400	8687799	AT3G24050
chr1	18319600	18322599	AT1G49490
chr1	18319600	18322599	AT1G49500
chr1	19174000	19175599	AT1G51700
chr1	180000	180999	AT1G01490
chr1	26694600	26696399	AT1G70780
chr1	26694600	26696399	AT1G70782
chr2	15136000	15136799	AT2G36050
chr5	25075600	25081399	AT5G62460
chr5	25075600	25081399	AT5G62470
chr1	739400	747599	AT1G03090
chr1	739400	747599	AT1G03100
chr1	739400	747599	AT1G03103
chr1	10860000	10860799	AT1G30630
chr1	10860000	10860799	AT1G30640
chr1	10264200	10266799	AT1G29340
chr2	15988600	15989599	AT2G38160
chr2	15988600	15989599	AT2G38170
chr2	17360400	17364399	AT2G41640
chr2	17360400	17364399	AT2G41650
chr4	7214600	7216599	AT4G12040
chr4	9660800	9663999	AT4G17230
chr1	537600	538799	AT1G02560
chr3	22741400	22742799	AT3G61460
chr4	386600	387999	AT4G00905
chr5	18834600	18835599	AT5G46440
chr4	12137800	12144999	AT4G23190
chr4	12137800	12144999	AT4G23205
chr4	12137800	12144999	AT4G23180
chr2	2329400	2330999	AT2G06000
chr2	2329400	2330999	AT2G06002
chr4	2661400	2662799	AT4G05150
chr4	12519800	12520799	AT4G24110
chr4	12519800	12520799	AT4G24100
chr5	6217600	6218599	AT5G18650
chr2	18698800	18699399	AT2G45360
chr1	29178600	29180199	AT1G77640
chr4	18213600	18218799	AT4G39080
chr4	18213600	18218799	AT4G39090
chr4	18213600	18218799	AT4G39100
chr2	14534200	14534799	AT2G34480
chr5	17458600	17459399	AT5G43450
chr5	17458600	17459399	AT5G43455
chr2	10765000	10765999	AT2G25290
chr4	18458000	18459199	AT4G39780
chr5	3161600	3162599	AT5G10100
chr1	7216600	7217199	AT1G20770
chr1	7216600	7217199	AT1G20780
chr4	1277800	1280399	AT4G02890
chr4	1277800	1280399	AT4G02880
chr3	3724000	3731799	AT3G11780
chr3	3724000	3731799	AT3G11800
chr3	3724000	3731799	AT3G11810
chr3	3724000	3731799	AT3G11820
chr3	3724000	3731799	AT3G11825
chr4	10942000	10943599	AT4G20260
chr1	8974600	8978399	AT1G25540
chr1	8974600	8978399	AT1G25550
chr5	17712400	17714999	AT5G44020
chr5	17712400	17714999	AT5G44030
chr3	383200	387799	AT3G02130
chr3	383200	387799	AT3G02140
chr4	9601000	9608199	AT4G17080
chr4	9601000	9608199	AT4G17085
chr4	9601000	9608199	AT4G17090
chr1	30156200	30158199	AT1G80180
chr1	197400	202399	AT1G01550
chr1	197400	202399	AT1G01560
chr1	197400	202399	AT1G01540
chr3	4379600	4380199	AT3G13445
chr3	22675000	22677399	AT3G61260
chr2	11860400	11862199	AT2G27830
chr2	11860400	11862199	AT2G27840
chr2	18372600	18377799	AT2G44500
chr2	18372600	18377799	AT2G44510
chr2	9788000	9790799	AT2G22990
chr2	16049200	16053199	AT2G38310
chr3	17987000	17987799	AT3G48530
chr5	17235000	17235599	AT5G42960
chr5	2855000	2861199	AT5G08760
chr5	2855000	2861199	AT5G08770
chr5	2855000	2861199	AT5G08780
chr5	2855000	2861199	AT5G08790
chr2	17410600	17411199	AT2G41740
chr2	19696400	19698199	AT2G48160
chr3	2611200	2612599	AT3G08590
chr3	2611200	2612599	AT3G08600
chr3	2952400	2954399	AT3G09630
chr4	11742000	11743199	AT4G22190
chr1	26399200	26406599	AT1G70090
chr1	26399200	26406599	AT1G70100
chr1	26399200	26406599	AT1G70110
chr5	26157000	26157599	AT5G65440
chr5	26157000	26157599	AT5G65445
chr1	3639600	3640399	AT1G10910
chr5	25263600	25264199	AT5G62950
chr1	12582000	12582999	AT1G34418
chr1	6567800	6569999	AT1G19020
chr1	6567800	6569999	AT1G19025
chr2	1966400	1968599	AT2G05380
chr5	3377000	3379199	AT5G10695
chr5	3377000	3379199	AT5G10700
chr5	3377000	3379199	AT5G10710
chr5	3377000	3379199	AT5G10690
chr3	256600	258799	AT3G01690
chr3	2472800	2473599	AT3G07740
chr3	2472800	2473599	AT3G07750
chr3	19310200	19313799	AT3G52060
chr3	19310200	19313799	AT3G52070
chr3	19310200	19313799	AT3G52072
chr2	18862400	18867999	AT2G45810
chr2	18862400	18867999	AT2G45820
chr2	18862400	18867999	AT2G45830
chr5	206000	206799	AT5G01520
chr3	18616200	18616799	AT3G50210
chr5	21124200	21124799	AT5G52020
chr3	16756800	16759199	AT3G45640
chr5	2892000	2893199	AT5G09320
chr5	2892000	2893199	AT5G09330
chr4	17698600	17699399	AT4G37670
chr1	26470800	26474799	AT1G70290
chr4	14807000	14807999	AT4G30230
chr4	14807000	14807999	AT4G30240
chr1	3252200	3256399	AT1G09970
chr1	3252200	3256399	AT1G09980
chr4	10640600	10647199	AT4G19520
chr1	7088000	7089199	AT1G20450
chr1	23390800	23392799	AT1G63080
chr1	23390800	23392799	AT1G63090
chr1	19844600	19851999	AT1G53210
chr1	19844600	19851999	AT1G53220
chr1	19844600	19851999	AT1G53230
chr1	19844600	19851999	AT1G53233
chr1	3018000	3018599	AT1G09340
chr5	387800	389199	AT5G02020
chr5	387800	389199	AT5G02021
chr4	15289400	15292599	AT4G31550
chr4	16340800	16351199	AT4G34120
chr4	16340800	16351199	AT4G34131
chr4	16340800	16351199	AT4G34135
chr4	16340800	16351199	AT4G34138
chr4	16340800	16351199	AT4G34140
chr5	20786600	20789399	AT5G51140
chr5	20786600	20789399	AT5G51150
chr1	20912400	20913799	AT1G55920
chr1	18748200	18748599	AT1G50620
chr2	15088800	15089599	AT2G35940
chr3	3281200	3282199	AT3G10525
chr1	3140600	3141199	AT1G09710
chr3	4650800	4653999	AT3G14050
chr3	4510400	4517799	AT3G13750
chr3	4510400	4517799	AT3G13760
chr1	813000	813599	AT1G03300
chr1	813000	813599	AT1G03310
chr4	16258200	16263199	AT4G33910
chr4	16258200	16263199	AT4G33920
chr1	30011200	30011799	AT1G79750
chr4	10578000	10579399	AT4G19395
chr5	20090600	20092999	AT5G49520
chr1	9884000	9887999	AT1G28280
chr1	9884000	9887999	AT1G28281
chr2	1022400	1023399	AT2G03360
chr3	22373000	22374799	AT3G60530
chr3	19449000	19451599	AT3G52470
chr1	5199000	5199599	AT1G15110
chr5	9160000	9160399	AT5G26210
chr4	14796600	14800799	AT4G30210
chr1	22884600	22885199	AT1G61900
chr5	25019000	25019599	AT5G62290
chr5	9096200	9099599	AT5G26030
chr5	9096200	9099599	AT5G26038
chr5	9096200	9099599	AT5G26040
chr1	4289400	4290999	AT1G12610
chr3	18572600	18573199	AT3G50080
chr3	1538400	1539999	AT3G05370
chr3	1538400	1539999	AT3G05380
chr1	21553000	21553799	AT1G58200
chr1	21553000	21553799	AT1G58210
chr3	18493800	18494799	AT3G49870
chr1	23129000	23129599	AT1G62480
chr2	18422800	18423799	AT2G44660
chr3	4747600	4747999	AT3G14260
chr3	15901800	15903399	AT3G44190
chr3	5758000	5763599	AT3G16857
chr3	5758000	5763599	AT3G16860
chr3	5758000	5763599	AT3G16870
chr1	8860600	8861999	AT1G25275
chr5	2828600	2829199	AT5G08690
chr5	2828600	2829199	AT5G08695
chr4	12611600	12615999	AT4G24370
chr4	12611600	12615999	AT4G24380
chr4	12611600	12615999	AT4G24390
chr4	1382400	1382999	AT4G03113
chr4	1382400	1382999	AT4G03115
chr3	3645600	3647399	AT3G11560
chr3	3645600	3647399	AT3G11570
chr5	2203800	2207199	AT5G07090
chr5	2203800	2207199	AT5G07100
chr5	2203800	2207199	AT5G07110
chr5	2203800	2207199	AT5G07120
chr1	17285200	17286999	AT1G47128
chr1	4229200	4231599	AT1G12423
chr4	12399000	12400199	AT4G23820
chr1	1995600	1996199	AT1G06520
chr3	16556800	16558199	AT3G45210
chr3	18158400	18161599	AT3G48980
chr3	18158400	18161599	AT3G48990
chr5	7207000	7208999	AT5G21170
chr5	7207000	7208999	AT5G21222
chr5	552800	557399	AT5G02500
chr5	26452800	26460999	AT5G66190
chr5	26452800	26460999	AT5G66200
chr5	26452800	26460999	AT5G66210
chr5	26452800	26460999	AT5G66211
chr5	22312400	22313399	AT5G54960
chr5	22312400	22313399	AT5G54970
chr2	7494400	7496199	AT2G17230
chr5	26949400	26950799	AT5G67560
chr1	17192600	17193399	AT1G45688
chr5	25321600	25324599	AT5G63120
chr5	25321600	25324599	AT5G63130
chr3	11191200	11193399	AT3G29240
chr3	1258800	1262199	AT3G04630
chr3	1258800	1262199	AT3G04650
chr3	1258800	1262199	AT3G04640
chr2	7692400	7693799	AT2G17705
chr2	7692400	7693799	AT2G17710
chr4	2593400	2594599	AT4G05070
chr4	2593400	2594599	AT4G05071
chr4	5268200	5268399	AT4G08345
chr4	7602000	7602999	AT4G13010
chr2	17489400	17490599	AT2G41900
chr1	130400	131399	AT1G01320
chr3	21759800	21761599	AT3G58850
chr1	25296800	25298199	AT1G67510
chr1	25296800	25298199	AT1G67500
chr1	20560400	20562599	AT1G55110
chr3	8181000	8182199	AT3G23030
chr3	16788200	16790599	AT3G45730
chr3	6780200	6780999	AT3G19540
chr3	20736400	20737599	AT3G55880
chr4	9254000	9256199	AT4G16380
chr4	9329400	9333999	AT4G16563
chr5	965000	967199	AT5G03690
chr5	965000	967199	AT5G03700
chr5	6466200	6468599	AT5G19220
chr5	6466200	6468599	AT5G19221
chr5	6466200	6468599	AT5G19230
chr1	5727000	5727799	AT1G16730
chr1	5727000	5727799	AT1G16740
chr4	9991000	9994999	AT4G18010
chr3	3418800	3420999	AT3G10920
chr3	3418800	3420999	AT3G10930
chr1	116000	129399	AT1G01300
chr1	116000	129399	AT1G01305
chr1	116000	129399	AT1G01310
chr1	116000	129399	AT1G01320
chr1	116000	129399	AT1G01290
chr5	20899600	20901599	AT5G51460
chr1	29641000	29647399	AT1G78850
chr1	29641000	29647399	AT1G78860
chr4	9945000	9948399	AT4G17900
chr1	21623800	21626399	AT1G58290
chr1	26512400	26514999	AT1G70370
chr1	789800	791399	AT1G03230
chr5	25841600	25844199	AT5G64660
chr1	21005400	21008199	AT1G56145
chr1	21005400	21008199	AT1G56140
chr2	14208600	14209399	AT2G33540
chr5	16569400	16570199	AT5G41400
chr2	10426000	10429599	AT2G24540
chr2	10426000	10429599	AT2G24545
chr2	10426000	10429599	AT2G24550
chr3	3944800	3945999	AT3G12400
chr5	17522400	17523799	AT5G43620
chr5	9629000	9632799	AT5G27320
chr5	9629000	9632799	AT5G27330
chr3	8941200	8944199	AT3G24518
chr3	8941200	8944199	AT3G24520
chr1	11221400	11222799	AT1G31350
chr1	19819800	19822199	AT1G53170
chr5	20800200	20802199	AT5G51180
chr5	20800200	20802199	AT5G51190
chr1	29446800	29459999	AT1G78260
chr1	29446800	29459999	AT1G78265
chr1	29446800	29459999	AT1G78270
chr1	29446800	29459999	AT1G78280
chr1	29446800	29459999	AT1G78290
chr5	16688400	16692999	AT5G41740
chr4	9556200	9558799	AT4G16980
chr5	25753000	25754999	AT5G64410
chr3	6168600	6171799	AT3G18030
chr3	6168600	6171799	AT3G18035
chr5	5418800	5420199	AT5G16567
chr1	7493200	7497599	AT1G21400
chr1	7493200	7497599	AT1G21410
chr5	7663200	7668599	AT5G22910
chr5	7663200	7668599	AT5G22920
chr5	7663200	7668599	AT5G22930
chr4	11006000	11007399	AT4G20380
chr4	11006000	11007399	AT4G20390
chr4	18485600	18487399	AT4G39838
chr4	18485600	18487399	AT4G39840
chr1	28668800	28669999	AT1G76410
chr5	22306200	22309799	AT5G54930
chr5	22306200	22309799	AT5G54940
chr5	19975800	19978199	AT5G49280
chr4	7042400	7043799	AT4G11660
chr1	29354200	29360199	AT1G78070
chr2	10565600	10568599	AT2G24780
chr2	10565600	10568599	AT2G24790
chr2	6389200	6390399	AT2G14860
chr4	12108600	12109799	AT4G23103
chr4	12326600	12327999	AT4G23650
chr4	12326600	12327999	AT4G23660
chr2	11669600	11671999	AT2G27260
chr2	8139400	8140599	AT2G18790
chr1	28552600	28555999	AT1G76100
chr1	28552600	28555999	AT1G76110
chr1	4575400	4578199	AT1G13350
chr1	4575400	4578199	AT1G13360
chr5	26615200	26618599	AT5G66675
chr5	26615200	26618599	AT5G66680
chr1	22629600	22630599	AT1G61340
chr3	3919000	3919599	AT3G12290
chr3	3919000	3919599	AT3G12280
chr3	7041600	7042399	AT3G20170
chr5	7242400	7243799	AT5G21930
chr5	7242400	7243799	AT5G21920
chr5	4441400	4442199	AT5G13760
chr5	4441400	4442199	AT5G13750
chr5	22580600	22581999	AT5G55790
chr5	22580600	22581999	AT5G55800
chr2	16349600	16350999	AT2G39190
chr2	3259600	3509799	AT2G07673	removed from list
chr2	3259600	3509799	AT2G07674
chr2	3259600	3509799	AT2G07675
chr2	3259600	3509799	AT2G07676
chr2	3259600	3509799	AT2G07684
chr2	3259600	3509799	AT2G07745
chr2	3259600	3509799	AT2G07746
chr2	3259600	3509799	AT2G07751
chr2	3259600	3509799	AT2G07768
chr2	3259600	3509799	AT2G07669
chr2	3259600	3509799	AT2G07678
chr2	3259600	3509799	AT2G07681
chr2	3259600	3509799	AT2G07748
chr2	3259600	3509799	AT2G07778
chr2	3259600	3509799	AT2G07752
chr2	3259600	3509799	AT2G07753
chr2	3259600	3509799	AT2G07754
chr2	3259600	3509799	AT2G07772
chr2	3259600	3509799	AT2G07774
chr2	3259600	3509799	AT2G07687
chr2	3259600	3509799	AT2G07689
chr2	3259600	3509799	AT2G07691
chr2	3259600	3509799	AT2G07692
chr2	3259600	3509799	AT2G07755
chr2	3259600	3509799	AT2G07792
chr2	3259600	3509799	AT2G07599
chr2	3259600	3509799	AT2G07695
chr2	3259600	3509799	AT2G07696
chr2	3259600	3509799	AT2G07785
chr2	3259600	3509799	AT2G07667
chr2	3259600	3509799	AT2G07698
chr2	3259600	3509799	AT2G07701
chr2	3259600	3509799	AT2G07702
chr2	3259600	3509799	AT2G07793
chr2	3259600	3509799	AT2G07705
chr2	3259600	3509799	AT2G07706
chr2	3259600	3509799	AT2G07707
chr2	3259600	3509799	AT2G07708
chr2	3259600	3509799	AT2G07794
chr2	3259600	3509799	AT2G07713
chr2	3259600	3509799	AT2G07715
chr2	3259600	3509799	AT2G07718
chr2	3259600	3509799	AT2G07719
chr2	3259600	3509799	AT2G07721
chr2	3259600	3509799	AT2G07722
chr2	3259600	3509799	AT2G07724
chr2	3259600	3509799	AT2G07725
chr2	3259600	3509799	AT2G07727
chr2	3259600	3509799	AT2G07728
chr2	3259600	3509799	AT2G07756
chr2	3259600	3509799	AT2G07757
chr2	3259600	3509799	AT2G07815
chr2	3259600	3509799	AT2G07732
chr2	3259600	3509799	AT2G07758
chr2	3259600	3509799	AT2G07820
chr2	3259600	3509799	AT2G07775
chr2	3259600	3509799	AT2G07787
chr2	3259600	3509799	AT2G07806
chr2	3259600	3509799	AT2G07825
chr2	3259600	3509799	AT2G07827
chr2	3259600	3509799	AT2G07830
chr2	3259600	3509799	AT2G07738
chr2	3259600	3509799	AT2G07739
chr2	3259600	3509799	AT2G07741
chr2	3259600	3509799	AT2G07759
chr2	3259600	3509799	AT2G07761
chr2	3259600	3509799	AT2G07762
chr2	3259600	3509799	AT2G07763
chr2	3259600	3509799	AT2G07764
chr2	3259600	3509799	AT2G07765
chr2	3259600	3509799	AT2G07766
chr2	3259600	3509799	AT2G07795
chr2	3259600	3509799	AT2G07835
chr2	3259600	3509799	AT2G07798
chr2	3259600	3509799	AT2G07734
chr2	3259600	3509799	AT2G07714
chr4	11155400	11159599	AT4G20840
chr4	11155400	11159599	AT4G20830
chr5	19886200	19887199	AT5G49060
chr4	9299800	9302799	AT4G16500
chr4	9299800	9302799	AT4G16510
chr1	27740800	27742399	AT1G73760
chr1	27740800	27742399	AT1G73770
chr5	6694800	6695799	AT5G19820
chr1	5844200	5846199	AT1G17090
chr1	5844200	5846199	AT1G17100
chr1	5844200	5846199	AT1G17110
chr5	7364000	7366599	AT5G22220
chr5	7364000	7366599	AT5G22240
chr5	7364000	7366599	AT5G22250
chr5	13588000	13588999	AT5G35360
chr5	13588000	13588999	AT5G35370
chr5	26399000	26399999	AT5G66005
chr5	26399000	26399999	AT5G66010
chr1	1974000	1974799	AT1G06475
chr1	26381600	26382799	AT1G70040
chr1	26381600	26382799	AT1G70050
chr1	18932600	18934599	AT1G51090
chr1	18932600	18934599	AT1G51100
chr3	1197400	1198999	AT3G04485
chr1	6620800	6624799	AT1G19180
chr1	6620800	6624799	AT1G19190
chr2	7971600	7972599	AT2G18350
chr5	25928600	25929399	AT5G64860
chr2	12617400	12619399	AT2G29410
chr2	12617400	12619399	AT2G29420
chr5	26394200	26394999	AT5G65980
chr5	26394200	26394999	AT5G65990
chr1	7041000	7043599	AT1G20340
chr1	877600	877999	AT1G03515
chr1	877600	877999	AT1G03520
chr4	11993600	11993999	AT4G22840
chr4	16284800	16285399	AT4G33980
chr2	11117800	11118399	AT2G26100
chr3	23200800	23202999	AT3G62720
chr2	17918800	17919799	AT2G43090
chr5	9050400	9052199	AT5G25930
chr5	22123600	22126599	AT5G54500
chr2	14308600	14311199	AT2G33830
chr5	17585000	17588599	AT5G43760
chr5	16298400	16299999	AT5G40720
chr4	15764600	15765999	AT4G32680
chr4	15764600	15765999	AT4G32690
chr5	19623400	19624599	AT5G48410
chr5	19623400	19624599	AT5G48412
chr4	17902000	17902399	AT4G38150
chr4	17902000	17902399	AT4G38160
chr1	16134400	16137999	AT1G42980
chr1	16134400	16137999	AT1G42990
chr1	8431800	8436599	AT1G23870
chr1	8431800	8436599	AT1G23880
chr5	2757800	2759399	AT5G08520
chr5	2757800	2759399	AT5G08530
chr2	9007000	9009599	AT2G20960
chr1	4153600	4159399	AT1G12240
chr1	4153600	4159399	AT1G12244
chr1	4153600	4159399	AT1G12250
chr1	20863800	20864599	AT1G55810
chr1	20863800	20864599	AT1G55820
chr2	15469400	15470999	AT2G36854
chr2	15469400	15470999	AT2G36860
chr2	15469400	15470999	AT2G36850
chr5	26293800	26294799	AT5G65710
chr1	25765400	25767599	AT1G68620
chr5	8588600	8591199	AT5G24930
chr4	9775400	9776199	AT4G17530
chr4	9775400	9776199	AT4G17540
chr4	15819200	15820399	AT4G32800
chr4	10296000	10299399	AT4G18710
chr1	7609400	7616399	AT1G21670
chr1	7609400	7616399	AT1G21680
chr1	7609400	7616399	AT1G21690
chr2	2587400	2589199	AT2G06510
chr2	2587400	2589199	AT2G06520
chr2	2587400	2589199	AT2G06530
chr4	6656400	6657199	AT4G10840
chr3	19995800	19998599	AT3G54000
chr2	11513000	11513799	AT2G26975
chr5	2561600	2562799	AT5G07990
chr4	16533800	16535199	AT4G34620
chr1	171200	173599	AT1G01470
chr2	3612000	3630199	AT2G08986
