# Supplementary material for: Epigenetic silencing of a multifunctional plant stress regulator
Source: eLife. 2019 Aug 16;8:e47835. doi: 10.7554/eLife.47835 (PMC6739875; doi:10.7554/eLife.47835)
Supplement: Supplementary file 7. — Tables displaying differentially regulated genes in ino80-8, een-2 and arp5-1 seedlings. Differentially expressed genes were discovered with edgeR. [file elife-47835-supp7.xlsx]

## Sheet: up-regulated in ino80-8
Supplementary File 7: Differentially regulated genes in untreated ino80-8, een-2 and arp5-1 seedlings
edgeR Col-0 vs ino80-8
up-regulated genes in ino80-8
GeneID	logFC	logCPM	F	PValue	FDR
AT3G05260	9.15343	2.22292	140.651	2.67862e-21	2.25038e-18
AT5G57550	7.8741	1.03699	48.7259	2.46666e-10	3.61974e-08
AT1G12805	7.36626	0.591623	30.878	1.98715e-07	1.54579e-05
AT1G25310	7.33676	0.586413	33.6228	6.69347e-08	5.73812e-06
AT4G27160	6.71941	5.1774	327.985	1.07191e-34	3.60215e-31
AT2G13680	6.35948	-0.200678	14.4402	0.000239339	0.00709885
AT1G75830	6.18209	4.3554	408.171	1.05272e-38	5.89613e-35
AT2G17850	6.14333	-0.352955	12.1725	0.000702242	0.017113
AT2G40435	5.98945	-0.463115	10.6254	0.00149093	0.0309085
AT5G54740	5.98135	6.29143	981.084	1.99114e-56	2.23041e-52
AT5G44120	5.95497	8.15725	1688.48	2.62082e-68	8.80727e-64
AT3G22640	5.89838	5.34812	733.56	2.62599e-50	2.20616e-46
AT1G21550	5.8938	-0.522762	9.96485	0.00206674	0.0400074
AT1G64310	5.88196	-0.523952	9.90393	0.00213029	0.0409204
AT5G12030	5.52482	2.43908	131.629	1.76983e-20	1.41607e-17
AT1G13609	5.49012	1.10004	39.0469	8.14717e-09	8.63678e-07
AT3G22500	5.43364	1.85354	86.4793	1.65416e-15	5.67224e-13
AT3G27660	5.12978	2.97719	185.081	2.8951e-25	5.12052e-22
AT5G35660	5.10355	2.71322	153.561	1.4644e-22	1.64037e-19
AT1G77950	4.79607	3.05516	189.228	1.34236e-25	2.50612e-22
AT1G68250	4.73689	5.10343	599.502	3.45136e-46	2.31966e-42
AT2G05580	4.73221	1.7208	72.4103	1.0239e-13	2.66731e-11
AT1G03880	4.71346	3.27397	198.571	2.46954e-26	4.88169e-23
AT2G23640	4.616	0.381291	21.2869	1.08124e-05	0.000535124
AT4G27170	4.60972	1.9586	74.1675	6.00927e-14	1.62856e-11
AT1G05510	4.60727	2.49481	125.805	6.81057e-20	4.51442e-17
AT4G27140	4.52243	3.33476	154.55	1.19107e-22	1.3802e-19
AT1G54870	4.4589	4.18004	353.244	4.93361e-36	2.07243e-32
AT5G45690	4.41445	2.07634	85.233	2.35433e-15	7.8334e-13
AT2G23240	4.37674	1.76872	69.8179	2.26957e-13	5.56708e-11
AT1G54860	4.3249	1.72105	66.6679	6.0675e-13	1.41596e-10
AT4G25140	4.29463	4.14089	280.348	5.98758e-32	1.54779e-28
AT4G27150	4.27165	3.58297	180.388	7.00175e-25	1.12045e-21
AT1G27990	4.25518	1.30441	46.0384	6.21731e-10	8.2257e-08
AT2G41260	4.07263	4.23726	322.152	2.23832e-34	6.83806e-31
AT2G15010	4.05709	1.11684	35.685	2.94293e-08	2.73954e-06
AT4G28520	4.0007	7.44689	1000.9	7.43101e-57	1.24859e-52
AT2G02120	3.99983	1.70301	56.9413	1.42438e-11	2.6741e-09
AT3G04960	3.84395	0.966384	30.4309	2.34256e-07	1.78507e-05
AT4G26740	3.7294	1.71087	57.5802	1.15096e-11	2.17291e-09
AT3G46230	3.67916	2.57074	88.5816	9.16742e-16	3.3854e-13
AT3G01570	3.66597	3.95237	246.537	8.71226e-30	1.95184e-26
AT3G50770	3.6555	2.44119	93.6717	2.25418e-16	9.46898e-14
AT1G08090	3.59593	0.285171	14.546	0.000226812	0.0067993
AT2G42560	3.58699	2.80195	121.686	1.80347e-19	1.12232e-16
AT5G36140	3.50578	1.01432	30.1461	2.62778e-07	1.98863e-05
AT1G65090	3.48281	2.02536	67.1288	5.24845e-13	1.24207e-10
AT4G16160	3.47014	1.85422	56.9056	1.44148e-11	2.69117e-09
AT3G53310	3.44033	0.969679	28.2425	5.70441e-07	3.92018e-05
AT3G56350	3.3238	2.02589	63.8999	1.46177e-12	3.16921e-10
AT5G51760	3.30976	0.861408	24.4413	2.78425e-06	0.00015994
AT1G14950	3.2971	0.841621	23.6337	3.92602e-06	0.00021664
AT3G22490	3.25257	0.473869	16.6615	8.52601e-05	0.00301914
AT3G58540	3.20269	0.442594	15.9244	0.000119582	0.00403469
AT4G18920	3.17694	-0.0205246	9.76655	0.00227617	0.0428759
AT2G21490	3.09335	2.61141	87.4984	1.24154e-15	4.43851e-13
AT4G11310	3.04573	1.77765	43.7485	1.42407e-09	1.74657e-07
AT1G04560	2.96956	3.49689	141.712	1.85265e-21	1.59637e-18
AT2G24680	2.96381	0.277241	11.5112	0.000964174	0.0218926
AT5G55240	2.94441	0.839698	20.3729	1.61394e-05	0.000743983
AT4G34400	2.85885	0.768018	18.3319	3.99972e-05	0.00160971
AT3G03776	2.85246	0.501962	14.4758	0.000234392	0.00698098
AT4G39480	2.78283	1.2774	27.3186	8.34634e-07	5.46859e-05
AT5G50770	2.7393	0.100074	9.37289	0.00277168	0.0499423
AT1G80090	2.72485	1.39057	30.655	2.14038e-07	1.64594e-05
AT3G26830	2.71404	1.22734	25.3113	1.92812e-06	0.000115911
AT1G47540	2.67377	0.841574	18.2003	4.24348e-05	0.0016876
AT3G16530	2.63286	3.59551	133.275	1.2166e-20	9.9717e-18
AT2G33070	2.59419	1.54141	31.9882	1.25537e-07	1.01711e-05
AT3G50480	2.58277	2.73929	75.0046	4.67069e-14	1.29718e-11
AT4G01390	2.56065	0.282437	10.1929	0.00184139	0.036637
AT1G16730	2.55339	0.746947	15.4158	0.000151262	0.00488639
AT5G33355	2.5473	0.745288	15.4232	0.000150744	0.00487561
AT2G40170	2.51654	4.44701	183.541	3.86232e-25	6.48966e-22
AT5G56080	2.5043	3.2764	92.9333	2.7567e-16	1.14369e-13
AT2G41280	2.48116	2.16958	47.3413	3.90243e-10	5.44155e-08
AT3G21351	2.40039	0.994963	16.6102	8.72846e-05	0.0030682
AT5G02780	2.39761	1.79588	34.702	4.31063e-08	3.85262e-06
AT5G64120	2.39602	6.39947	385.285	1.25557e-37	6.02765e-34
AT1G24095	2.38293	0.41248	10.4374	0.00163165	0.0332716
AT1G13790	2.37769	0.617424	12.4481	0.00061311	0.0154334
AT1G78520	2.37071	0.411166	10.2041	0.00183126	0.0364651
AT3G46870	2.36647	0.794384	14.5016	0.000231576	0.00690516
AT5G23990	2.35771	1.77027	32.2095	1.1496e-07	9.4687e-06
AT5G48390	2.35764	0.613521	12.0302	0.000749772	0.0180617
AT5G57220	2.35682	1.66437	30.4328	2.34076e-07	1.78507e-05
AT1G43800	2.35207	3.09827	41.8682	2.84072e-09	3.2581e-07
ATCG00160	2.34391	0.590157	11.8487	0.00081852	0.0192182
AT5G65165	2.3394	0.589978	11.8793	0.000806521	0.0189798
AT1G52120	2.33452	1.09224	18.7148	3.36884e-05	0.00139219
AT5G43590	2.29475	0.908886	15.6243	0.000137345	0.00452941
AT4G12170	2.28567	1.03993	16.7032	8.36501e-05	0.00298098
AT3G60140	2.26639	4.17351	146.056	7.20759e-22	6.92032e-19
AT2G41240	2.25537	1.68564	29.0137	4.16101e-07	3.03981e-05
AT4G13300	2.23406	0.529353	10.0927	0.00193518	0.0380302
AT5G66780	2.22453	2.87258	62.472	2.31395e-12	4.92154e-10
AT4G12870	2.1879	2.00153	34.3551	4.93575e-08	4.38798e-06
AT1G49700	2.16083	1.51432	23.7937	3.66693e-06	0.000204652
AT2G28490	2.13784	3.42344	87.0807	1.39624e-15	4.93901e-13
AT1G58460	2.12644	0.930955	14.1641	0.000271305	0.00783038
AT3G19920	2.11348	2.35148	43.1316	1.7844e-09	2.13398e-07
AT1G24580	2.10437	0.592078	9.63055	0.0024361	0.0452545
AT5G22470	2.0935	2.61198	50.9588	1.09379e-10	1.70962e-08
AT2G42730	2.08383	1.15051	16.6776	8.46341e-05	0.00300413
AT4G27300	2.06314	1.83508	27.1525	8.94046e-07	5.7985e-05
AT5G01870	2.04241	2.52921	43.6645	1.46842e-09	1.78791e-07
AT4G09600	2.00839	1.48618	20.6602	1.42247e-05	0.000674219
AT4G37900	1.99121	3.26015	70.2516	1.98498e-13	4.94113e-11
AT5G09710	1.98903	0.694507	9.84943	0.00218404	0.041607
AT1G45035	1.96899	0.670375	9.76767	0.00227489	0.0428759
AT1G77520	1.96356	1.70013	23.5454	4.07695e-06	0.000223866
AT2G18000	1.95799	0.669088	9.56605	0.00251596	0.0464045
AT1G07400	1.95141	1.15374	14.8594	0.000195911	0.00600693
AT1G56300	1.93566	4.17509	107.693	5.65012e-18	2.87685e-15
AT5G37990	1.92301	4.90234	162.235	2.45592e-23	3.05671e-20
AT1G03106	1.91818	2.74153	45.949	6.42023e-10	8.4278e-08
AT1G72100	1.90841	2.91693	51.721	8.39889e-11	1.33765e-08
AT2G22540	1.9066	4.38602	120.654	2.30812e-19	1.38508e-16
AT1G73190	1.90557	3.70311	83.5531	3.80266e-15	1.22873e-12
AT2G26692	1.90444	1.13193	14.1341	0.000275157	0.00790313
AT1G76720	1.90317	2.33546	35.8422	2.76939e-08	2.60687e-06
AT3G51810	1.87876	4.19304	106.027	8.64467e-18	4.33588e-15
AT4G25150	1.86703	2.06553	28.2802	5.61668e-07	3.88371e-05
AT3G56970	1.8009	2.42076	33.6933	6.39655e-08	5.5117e-06
AT1G48470	1.80029	1.41435	15.0866	0.000176239	0.00550513
AT3G09190	1.78207	1.03689	11.7695	0.00085053	0.0198624
AT5G11610	1.7819	1.0358	11.5441	0.00094885	0.0215738
AT3G54940	1.76504	3.94758	80.112	1.02917e-14	3.08796e-12
AT2G41810	1.75912	1.54306	17.5789	5.61693e-05	0.00212325
AT3G05190	1.75719	2.46295	30.4825	2.29433e-07	1.75629e-05
AT3G45130	1.7569	1.21124	13.1539	0.000437506	0.0116408
AT5G40420	1.75127	4.21931	85.9138	1.94091e-15	6.58832e-13
AT3G11000	1.73602	0.889819	9.69048	0.00236424	0.0441881
AT1G75060	1.73478	1.59807	17.8609	4.94471e-05	0.00190777
AT4G11990	1.72467	0.888746	9.67091	0.00238746	0.0445262
AT2G36640	1.71075	3.04226	43.8862	1.35435e-09	1.67327e-07
AT1G15330	1.7083	3.68043	67.6698	4.42917e-13	1.05562e-10
AT1G27461	1.70608	1.42287	14.1863	0.00026849	0.0077714
AT3G58450	1.70073	2.56422	33.7332	6.29714e-08	5.45401e-06
ATCG01130	1.69727	2.5015	28.1643	5.89054e-07	4.02341e-05
AT1G18970	1.68541	3.12279	47.4642	3.73542e-10	5.23036e-08
AT1G17810	1.67535	3.77787	71.7217	1.26352e-13	3.24128e-11
AT4G28140	1.66712	2.28335	26.7927	1.03792e-06	6.64367e-05
AT3G53160	1.66454	1.05784	10.6236	0.00148852	0.0308776
AT4G28940	1.61827	1.28091	12.1817	0.000696944	0.0170333
AT2G16660	1.61742	1.87189	19.5423	2.32985e-05	0.00102614
AT2G23110	1.60731	1.42413	12.7313	0.000535266	0.0138366
AT3G12145	1.59083	2.78761	33.8615	5.98789e-08	5.22658e-06
AT4G33560	1.58407	1.40164	11.3823	0.0010266	0.0229839
AT2G12190	1.5818	1.89391	18.6957	3.39779e-05	0.00140101
AT4G22250	1.55594	1.93485	18.9998	2.96596e-05	0.00125215
AT1G12130	1.55419	1.31539	11.7176	0.000872231	0.0202286
AT5G48430	1.54985	3.53971	50.3515	1.35128e-10	2.04549e-08
AT4G21903	1.53981	1.29886	10.9074	0.00129476	0.0276778
AT4G15236	1.53239	1.51418	13.4928	0.000372455	0.0102208
AT1G78390	1.52706	1.70194	15.337	0.000156892	0.00501174
AT1G66345	1.51184	2.173	21.5754	9.53473e-06	0.000481103
AT5G07330	1.50732	2.3895	24.7605	2.43236e-06	0.000142901
AT1G01580	1.49033	4.80956	96.5525	1.03525e-16	4.57759e-14
AT4G24150	1.48729	2.56868	26.3802	1.2323e-06	7.72601e-05
AT1G03445	1.48106	1.97136	18.0669	4.50604e-05	0.00177223
AT4G34570	1.47994	3.38085	45.2989	8.11361e-10	1.04467e-07
AT3G54420	1.47228	1.40798	11.5345	0.000953292	0.0216602
AT1G23540	1.46452	1.17508	9.41305	0.00271639	0.0492364
AT5G64770	1.46388	2.97688	34.7678	4.20154e-08	3.76514e-06
AT2G32620	1.4625	1.39795	11.0425	0.00121184	0.0261673
AT1G14520	1.45477	3.5867	48.1222	2.95763e-10	4.21149e-08
AT5G52950	1.45221	2.7467	28.3121	5.54376e-07	3.8412e-05
AT5G07660	1.44019	1.84752	15.4529	0.000148683	0.00483668
AT2G18540	1.42479	2.43215	23.1398	4.85036e-06	0.000261632
AT1G02670	1.42259	1.83811	15.1149	0.000173936	0.00544238
AT4G21250	1.41907	1.78905	14.2448	0.000261207	0.00764621
AT3G25190	1.4168	3.56441	44.2224	1.19832e-09	1.50822e-07
AT1G17665	1.41536	2.25455	20.4251	1.57729e-05	0.000733123
AT5G65080	1.39777	1.86573	14.3158	0.000252646	0.00742797
AT5G39150	1.39528	2.4428	20.6424	1.43362e-05	0.000677594
AT5G51440	1.39281	2.12069	17.9632	4.72167e-05	0.00183012
AT5G25020	1.38981	2.08108	17.5181	5.77373e-05	0.00217025
AT2G19410	1.38664	1.75495	13.3051	0.000407154	0.011014
AT3G20440	1.38384	1.41045	10.4454	0.00162525	0.0331612
AT3G18450	1.38145	1.3478	9.69365	0.0023605	0.0441881
AT1G05650	1.37713	3.48209	42.0743	2.63245e-09	3.02957e-07
AT5G46050	1.37451	2.11149	17.5938	5.57916e-05	0.0021118
AT5G17810	1.37268	1.98604	15.0327	0.000180722	0.0056233
AT5G47980	1.35519	3.35599	36.882	1.856e-08	1.84529e-06
AT2G28590	1.35103	1.9707	15.3798	0.000153808	0.0049478
AT4G31830	1.34932	1.38032	9.39458	0.00274168	0.0495078
AT3G41979	1.33802	1.61363	11.1058	0.00117487	0.0256042
AT1G77170	1.33243	1.77538	12.3685	0.00063702	0.015916
AT5G11460	1.32979	3.40068	37.1301	1.68773e-08	1.69302e-06
AT5G45095	1.32577	1.49228	9.60322	0.00246961	0.0456994
AT1G67820	1.3249	1.66677	11.7587	0.000854997	0.0199252
AT4G10630	1.32079	1.48762	10.026	0.00200042	0.0390045
AT5G64080	1.32027	2.26015	17.524	5.75837e-05	0.0021694
AT4G25110	1.31231	1.70655	11.8864	0.000803752	0.0189279
AT4G11210	1.31208	5.48959	100.856	3.30448e-17	1.56404e-14
AT5G14450	1.30928	3.20139	28.6648	4.79819e-07	3.43802e-05
AT1G13420	1.30431	6.51768	131.087	2.00347e-20	1.56574e-17
AT5G02690	1.30062	1.54237	10.2544	0.00178617	0.0358073
AT1G61340	1.2981	2.30463	17.1587	6.79661e-05	0.00249618
AT1G69830	1.29241	5.27626	89.067	8.00682e-16	2.98966e-13
AT1G69900	1.28888	2.24062	16.7685	8.11903e-05	0.00291184
AT5G52640	1.28723	4.44605	64.144	1.35193e-12	2.9501e-10
AT5G42900	1.28216	2.74682	22.8886	5.40282e-06	0.000290035
AT4G25410	1.28165	2.56975	20.7657	1.3581e-05	0.000650273
AT1G35625	1.27375	2.29927	17.0551	7.12459e-05	0.00260808
AT1G02920	1.26853	5.38915	91.6238	3.9465e-16	1.57883e-13
AT3G51450	1.26704	2.41965	18.6203	3.51436e-05	0.001442
AT5G65100	1.26286	1.61606	10.1876	0.00184623	0.0367116
AT5G66400	1.2618	6.03015	109.345	3.71897e-18	1.98375e-15
AT5G50200	1.25791	5.63022	96.6869	9.98609e-17	4.47443e-14
AT5G55250	1.25701	4.70512	66.2887	6.83841e-13	1.56597e-10
AT1G02700	1.25391	2.43374	17.6073	5.54531e-05	0.00210327
AT1G27020	1.25214	4.91139	71.632	1.29868e-13	3.30623e-11
AT1G66800	1.25192	5.5249	92.4449	3.15057e-16	1.29116e-13
AT3G59930	1.23535	3.85453	42.9703	1.89307e-09	2.24041e-07
AT5G44310	1.23485	2.3908	15.2204	0.000165619	0.00523086
AT5G01300	1.23233	2.5125	18.2923	4.07152e-05	0.00163079
AT1G60090	1.21646	2.10834	13.2491	0.000418135	0.0112682
AT3G58060	1.20818	2.37231	15.5096	0.000144831	0.00473447
ATCG00040	1.20747	3.09282	21.2647	1.09175e-05	0.000539535
AT1G66700	1.20015	4.24213	49.707	1.69268e-10	2.51693e-08
AT5G38710	1.19194	2.48799	14.5118	0.000230467	0.00687949
AT4G31940	1.18579	3.65619	34.3174	5.00899e-08	4.44135e-06
AT1G04640	1.17761	3.26211	27.6303	7.33814e-07	4.88314e-05
AT5G62490	1.1723	2.85193	19.6672	2.20432e-05	0.000978549
AT5G58860	1.16677	2.8948	20.8051	1.33484e-05	0.000642655
AT5G07650	1.16526	2.22401	13.6833	0.000340341	0.00949142
AT4G21020	1.16092	3.79399	34.7965	4.15485e-08	3.73325e-06
AT1G48660	1.1599	3.32322	26.3207	1.26325e-06	7.90529e-05
AT5G40080	1.15484	2.284	13.7234	0.000333955	0.00933657
AT1G30820	1.14846	5.88126	88.2044	1.01866e-15	3.72086e-13
AT5G44417	1.14756	3.61347	31.0083	1.85717e-07	1.44803e-05
AT1G48130	1.14472	4.5763	54.481	3.2628e-11	5.65187e-09
AT3G08800	1.12618	2.9811	21.1784	1.13365e-05	0.000556966
AT5G46960	1.12614	2.01703	11.1724	0.00113729	0.0249958
AT1G78460	1.12599	2.5424	15.8881	0.000121601	0.00409458
AT1G21100	1.12501	6.06723	86.6054	1.5963e-15	5.53027e-13
AT1G04050	1.12419	2.71201	18.1678	4.30592e-05	0.00170839
AT4G29990	1.12417	2.59407	16.8766	7.72825e-05	0.00279602
AT4G37610	1.12153	3.60845	30.5088	2.27015e-07	1.74175e-05
AT1G18940	1.11903	2.78229	18.0572	4.52579e-05	0.00177287
AT4G31770	1.11829	3.28822	25.0583	2.14494e-06	0.000128257
AT1G53920	1.11683	2.58831	16.6396	8.61184e-05	0.00304312
AT4G00910	1.11374	4.28958	44.0717	1.26587e-09	1.57553e-07
AT4G30660	1.1127	2.85918	19.0584	2.8895e-05	0.00122914
AT5G45380	1.11109	3.82295	34.9193	3.96088e-08	3.58775e-06
AT5G07280	1.1047	3.70743	32.0237	1.23777e-07	1.01012e-05
AT4G12400	1.10047	3.43073	26.6914	1.08254e-06	6.86393e-05
AT1G47840	1.10004	3.52665	28.7712	4.59399e-07	3.31289e-05
AT4G38050	1.09877	2.52527	15.4918	0.000146032	0.00476797
AT3G51350	1.08282	3.43926	25.945	1.47793e-06	9.12978e-05
AT2G21720	1.07918	2.40198	13.5203	0.000367633	0.0101477
AT5G28430	1.07838	1.98345	10.2536	0.0017869	0.0358073
AT1G05575	1.07666	2.01785	10.2999	0.00174643	0.0351219
AT3G13610	1.07247	4.18015	36.9131	1.83405e-08	1.82888e-06
AT5G03860	1.07004	8.23093	85.4294	2.22656e-15	7.48237e-13
AT1G17180	1.06901	3.93209	32.7406	9.31292e-08	7.76577e-06
AT3G17520	1.067	5.16787	57.6241	1.13427e-11	2.16575e-09
AT4G24670	1.06698	2.58022	15.1244	0.000173174	0.00542358
AT2G43510	1.06622	3.157	21.3191	1.06613e-05	0.000529206
AT4G25940	1.06347	3.9055	33.0952	8.09517e-08	6.818e-06
AT4G20240	1.05207	2.79611	16.6166	8.70275e-05	0.00306237
AT2G31010	1.05186	4.25586	39.3623	7.23415e-09	7.74216e-07
AT3G12830	1.04196	2.26616	11.6367	0.000907135	0.0208653
AT2G13550	1.04135	2.07183	10.0521	0.0019746	0.0386693
AT4G21326	1.03847	4.12381	36.3159	2.30698e-08	2.24063e-06
AT5G16240	1.03814	2.48923	13.231	0.000421762	0.0113274
AT1G52050	1.03718	3.03709	18.5788	3.58037e-05	0.0014673
AT2G02850	1.03444	3.12093	17.6623	5.40893e-05	0.00205518
AT3G07720	1.03441	6.71662	87.0309	1.41595e-15	4.95656e-13
AT2G15880	1.0344	4.92816	49.8205	1.62674e-10	2.42962e-08
AT5G47330	1.02939	2.34092	11.928	0.000787736	0.0186553
AT3G20940	1.02657	4.88535	51.013	1.0734e-10	1.68558e-08
AT1G77990	1.02515	3.31757	21.4413	1.01081e-05	0.000506234
AT3G59330	1.02489	2.97164	17.9756	4.69543e-05	0.00182228
AT3G15720	1.02107	2.50222	13.0445	0.000460914	0.0121961
AT4G23420	1.0208	4.05031	32.7127	9.41612e-08	7.83239e-06
AT1G06730	1.01759	3.95894	31.302	1.65095e-07	1.30235e-05
AT4G12545	1.01459	7.33872	89.3506	7.399e-16	2.79375e-13
AT2G31790	1.01138	2.46577	12.6426	0.000558482	0.0142895
AT5G39550	1.01038	3.30922	20.281	1.68063e-05	0.000769448
AT1G32380	1.00763	3.47586	23.6443	3.90838e-06	0.000216021
AT2G04090	1.00683	3.41483	20.7495	1.36779e-05	0.000652905
AT5G49850	1.00253	3.30243	20.383	1.60677e-05	0.000741697
AT4G19690	1.002	6.21683	74.8074	4.95579e-14	1.36508e-11
AT1G66810	1.00162	2.51005	12.7945	0.000519329	0.0134869
AT1G11450	1.0011	3.14462	19.1889	2.72625e-05	0.00117156
AT4G01883	0.998386	2.43505	11.9443	0.000781549	0.0186005
AT3G02620	0.99352	6.15607	70.007	2.14071e-13	5.28959e-11
AT1G17455	0.988008	3.60672	24.6201	2.58116e-06	0.000150329
AT3G09350	0.984486	3.66299	25.3598	1.88921e-06	0.00011398
AT5G23840	0.979733	5.36465	56.1915	1.83118e-11	3.36266e-09
AT1G03410	0.978714	4.14136	32.8379	8.96099e-08	7.50958e-06
AT4G22212	0.978133	5.134	50.8437	1.13845e-10	1.76302e-08
AT1G50950	0.970046	2.56649	12.3111	0.000654831	0.0162664
AT1G64180	0.969685	2.21807	9.66927	0.00238942	0.044535
AT5G64650	0.968722	2.86568	14.331	0.000250848	0.00738156
AT5G04120	0.966683	7.48401	66.5706	6.25649e-13	1.45e-10
AT5G23535	0.963008	3.44785	21.2029	1.12162e-05	0.00055267
AT3G45680	0.957454	2.50761	11.6255	0.000912085	0.0209505
AT5G10625	0.951596	3.66158	23.2315	4.6633e-06	0.000252758
AT2G15220	0.951082	3.76855	24.8602	2.33202e-06	0.000137246
AT4G36600	0.94943	2.59277	12.1611	0.000703884	0.0171282
AT3G02850	0.949031	4.1223	30.7361	2.07169e-07	1.60159e-05
AT1G60730	0.947977	5.4205	53.2197	5.01588e-11	8.55628e-09
AT1G52160	0.947223	2.9764	15.4122	0.000151514	0.00488639
AT4G01630	0.941543	4.335	29.2376	3.79825e-07	2.81766e-05
AT5G20710	0.93859	4.82072	41.7036	3.01901e-09	3.4275e-07
AT2G02990	0.938424	4.01042	27.7902	6.87022e-07	4.61748e-05
AT3G48940	0.935621	4.74791	35.8056	2.80889e-08	2.63666e-06
AT3G15670	0.930524	5.34679	42.9698	1.8934e-09	2.24041e-07
AT3G26290	0.930073	2.30401	9.70477	0.00234743	0.0440208
AT3G15770	0.923726	4.98855	43.7527	1.42193e-09	1.74657e-07
AT1G60050	0.921986	3.65634	20.3241	1.64903e-05	0.000758079
AT3G28930	0.921843	2.70468	12.2795	0.000664864	0.0164164
AT1G77120	0.918846	4.11802	18.4097	3.86247e-05	0.00157141
AT2G19870	0.914182	2.91603	13.9175	0.000304714	0.00859052
AT2G28860	0.913932	4.36824	32.173	1.16639e-07	9.58347e-06
AT1G05680	0.9138	3.97769	24.8781	2.31439e-06	0.000136687
AT1G60930	0.912956	2.66784	10.7954	0.00136794	0.0289133
AT1G13270	0.909524	3.87623	24.5297	2.68192e-06	0.000155365
AT3G56070	0.907795	3.49608	19.6358	2.23523e-05	0.000989949
AT2G29420	0.906533	5.97172	59.0706	7.02371e-12	1.38789e-09
AT4G31320	0.904961	2.63113	11.4507	0.00099295	0.0223284
AT2G37950	0.904211	2.8122	12.4557	0.000610878	0.0153887
AT3G13760	0.903941	2.61366	11.0532	0.00120551	0.0260913
AT3G23580	0.902017	2.69502	11.4791	0.000979331	0.0221024
AT5G49690	0.900926	2.71545	12.0072	0.000758132	0.0182113
AT5G17270	0.898543	2.44351	9.62184	0.00244673	0.0453423
AT1G78490	0.897065	3.81827	23.1851	4.7569e-06	0.000257416
AT4G22690	0.895563	2.36218	9.38976	0.00274832	0.0496011
AT4G01700	0.894472	3.70705	18.87	3.14289e-05	0.00131201
AT1G56430	0.893644	3.53118	19.0725	2.87135e-05	0.00122296
AT3G24500	0.892685	4.59808	33.7556	6.24203e-08	5.42024e-06
AT3G03450	0.88999	3.64385	20.6856	1.40666e-05	0.000668611
AT5G24280	0.888352	2.91742	13.0519	0.000459286	0.0121626
AT3G60810	0.884679	3.35408	17.0512	7.13731e-05	0.00260989
AT5G53090	0.883978	3.44561	17.9753	4.69602e-05	0.00182228
AT5G38005	0.877017	3.55554	18.8584	3.1593e-05	0.00131559
AT5G40250	0.872462	5.26353	43.2478	1.71004e-09	2.05235e-07
AT2G26370	0.871783	4.23126	26.5248	1.16026e-06	7.30162e-05
AT4G33070	0.87142	3.36156	15.7007	0.000132582	0.00439823
AT1G15380	0.870104	4.88428	36.4035	2.23046e-08	2.18527e-06
AT3G53040	0.869413	3.39383	16.677	8.46575e-05	0.00300413
AT4G39950	0.867063	6.06399	50.7911	1.15943e-10	1.78367e-08
AT2G02230	0.865333	3.38257	16.6672	8.5038e-05	0.00301445
AT4G27910	0.86322	4.57009	31.5428	1.49936e-07	1.19681e-05
AT3G29250	0.8583	7.17663	60.3731	4.57847e-12	9.15831e-10
AT4G01200	0.855959	2.68461	10.6643	0.00145898	0.0304258
AT2G43780	0.855102	2.82479	11.5498	0.00094623	0.0215288
AT1G02930	0.854495	3.84898	20.2153	1.73002e-05	0.000789911
AT1G26740	0.853145	2.91613	11.3287	0.00105374	0.0234975
AT5G05410	0.846381	3.95608	22.4341	6.57147e-06	0.000343444
AT3G50570	0.844615	2.9239	11.934	0.000785454	0.0186503
AT1G62280	0.843428	3.24975	14.2169	0.000264662	0.00770731
AT4G34131	0.843153	5.7739	47.2509	4.03004e-10	5.57323e-08
AT1G10830	0.83899	4.35548	27.3928	8.09417e-07	5.32299e-05
AT4G25580	0.833906	4.44666	25.1701	2.04625e-06	0.000122793
AT5G42830	0.833	2.96643	11.9799	0.000768196	0.0184131
AT4G25300	0.832968	2.84771	11.1105	0.0011722	0.0255625
AT1G63480	0.830687	3.39853	15.53	0.00014347	0.00469915
AT3G02510	0.829213	4.01481	21.2278	1.10946e-05	0.000547481
AT2G01880	0.825668	4.33694	25.8919	1.51117e-06	9.30089e-05
AT1G30070	0.82556	3.04246	12.3994	0.000627613	0.0157161
AT5G48570	0.825253	3.0915	12.8356	0.000509236	0.013235
AT5G51790	0.813917	4.02847	21.3485	1.05254e-05	0.000524007
AT5G11100	0.812669	4.24146	23.3777	4.38027e-06	0.000237801
AT5G57390	0.808809	3.18281	12.9483	0.000482541	0.0126381
AT4G02550	0.808535	3.36884	14.3369	0.000250162	0.00736782
AT1G24020	0.807641	4.79281	31.1413	1.76066e-07	1.38241e-05
AT5G26290	0.803981	3.47527	14.4152	0.000241135	0.00714579
AT1G53940	0.803971	3.24246	12.8425	0.000507545	0.0132013
AT1G70880	0.802359	4.00685	20.3887	1.60279e-05	0.000740998
AT1G64970	0.801538	3.60339	15.9406	0.000118689	0.0040086
AT1G10070	0.79983	5.32578	35.9876	2.61819e-08	2.49124e-06
AT5G49480	0.799745	5.34041	37.7284	1.34309e-08	1.37605e-06
AT1G55265	0.797479	5.45891	38.8444	8.79456e-09	9.29375e-07
AT4G33490	0.796773	3.08817	11.9314	0.00078643	0.0186503
AT3G47340	0.796767	8.50351	55.3012	2.47156e-11	4.43284e-09
AT2G28960	0.793585	3.6239	16.0883	0.000110892	0.0037756
AT3G22750	0.791351	3.47824	14.7801	0.000203302	0.00619399
AT4G02970	0.787859	4.53659	26.2661	1.29237e-06	8.05756e-05
AT4G19680	0.787093	2.98321	10.6462	0.00147203	0.0305922
AT1G11100	0.78536	2.86908	9.99232	0.00203415	0.0394674
AT1G21400	0.785263	5.10331	33.3034	7.45705e-08	6.36026e-06
AT4G30930	0.783282	3.26261	12.7756	0.00052406	0.0135888
AT5G55125	0.783088	3.14013	11.736	0.000864448	0.0200898
AT3G01260	0.782373	5.77277	40.4933	4.7343e-09	5.2507e-07
AT3G19050	0.780743	3.24919	12.6374	0.000559898	0.0143083
AT4G36515	0.780575	2.91034	9.69088	0.00236377	0.0441881
AT1G52200	0.777285	4.98725	31.1298	1.76884e-07	1.38559e-05
AT3G24927	0.77653	5.22569	32.2599	1.12683e-07	9.30395e-06
AT1G45015	0.772173	5.33562	34.8611	4.05166e-08	3.65029e-06
AT3G08040	0.771242	4.65594	26.7669	1.0491e-06	6.70245e-05
AT1G32860	0.771013	3.33993	12.1919	0.000693529	0.0169661
AT4G31800	0.768155	3.61569	15.271	0.00016177	0.00512856
AT5G53880	0.768008	2.98814	10.132	0.00189785	0.0374061
AT3G49600	0.766772	5.00911	30.7343	2.07318e-07	1.60159e-05
AT5G63520	0.766605	2.99977	9.90936	0.00211984	0.0408236
AT3G49120	0.764727	8.36481	52.3018	6.87403e-11	1.13236e-08
AT3G46490	0.764338	3.79906	16.7927	8.0301e-05	0.0028892
AT5G60950	0.764201	3.12404	11.193	0.0011259	0.0248067
AT1G51890	0.764084	3.36526	12.9552	0.000480964	0.0126272
AT3G59340	0.760835	3.74296	16.1071	0.000109934	0.00374678
AT2G26540	0.759878	4.36793	22.6499	5.98743e-06	0.000316164
AT1G32560	0.759812	4.04816	16.5727	8.87935e-05	0.00311798
AT3G48710	0.759302	4.34308	22.1948	7.28759e-06	0.000377349
AT5G23760	0.758599	3.28661	12.254	0.000673081	0.0165706
AT1G63300	0.758006	5.13236	31.3879	1.59518e-07	1.26429e-05
AT2G25890	0.757962	4.09525	18.3803	3.91381e-05	0.00158589
AT5G43180	0.757234	3.70652	14.8642	0.000195478	0.00599914
AT3G30775	0.757204	6.49151	45.3062	8.09235e-10	1.04467e-07
AT3G20490	0.755504	3.25327	11.1239	0.00116457	0.0254622
AT2G38400	0.753676	6.73596	47.71	3.42311e-10	4.81312e-08
AT4G37700	0.751344	3.23296	11.4499	0.000993335	0.0223284
AT4G33050	0.750179	3.46235	13.1206	0.000444502	0.0118083
AT3G13730	0.749208	3.13265	10.8268	0.00134698	0.0285767
AT1G76680	0.748403	5.9833	39.9582	5.78349e-09	6.33075e-07
AT2G28160	0.748314	4.45077	22.6867	5.89313e-06	0.000311872
AT3G08880	0.747474	3.12943	10.6539	0.00146648	0.0305146
AT5G57560	0.743696	5.19326	29.9975	2.79047e-07	2.09317e-05
AT1G53440	0.741023	4.22349	19.5733	2.29802e-05	0.00101478
AT5G48010	0.732086	7.38901	46.2958	5.669e-10	7.55979e-08
AT2G02170	0.731977	4.65922	22.854	5.48365e-06	0.000293904
AT4G12600	0.731456	4.52635	21.6339	9.2951e-06	0.000470424
AT4G02850	0.726494	3.02636	9.57099	0.00250975	0.0463153
AT3G22590	0.725602	3.73161	14.2029	0.000266409	0.00773116
AT1G76690	0.724909	5.58409	33.8191	6.08832e-08	5.30046e-06
AT4G12550	0.724129	8.29668	48.412	2.66958e-10	3.84704e-08
AT2G22330	0.722861	7.2292	40.8579	4.13258e-09	4.59852e-07
AT1G05210	0.721513	3.14294	10.1793	0.00185387	0.0368241
AT2G43535	0.72147	8.69911	49.5958	1.75994e-10	2.60541e-08
AT5G39580	0.717153	5.19429	24.5939	2.60994e-06	0.00015148
AT5G13520	0.71526	4.39324	20.4103	1.58757e-05	0.000736882
AT3G58830	0.715128	3.81283	14.9559	0.000187301	0.00580651
AT4G18197	0.714655	3.97293	15.8129	0.000125889	0.00420834
AT1G47750	0.71419	3.45297	11.9755	0.000769848	0.0184265
AT5G07720	0.713684	3.16465	9.97654	0.00205016	0.0397315
AT4G15530	0.713435	6.2279	35.8498	2.7613e-08	2.60656e-06
AT5G47990	0.712546	8.38722	47.2679	4.00566e-10	5.56241e-08
AT1G14960	0.711983	4.2244	17.9484	4.75336e-05	0.00184028
AT5G35935	0.711913	3.99806	16.3541	9.81438e-05	0.00340013
AT4G30650	0.710376	4.50227	20.6081	1.45538e-05	0.000683075
AT5G07580	0.708467	5.37032	30.1102	2.66626e-07	2.00896e-05
AT4G12480	0.705913	5.34176	23.3814	4.37335e-06	0.000237801
AT3G47040	0.704848	4.08533	16.6343	8.63273e-05	0.00304596
AT2G36270	0.704638	3.26543	10.4902	0.00158972	0.0325548
AT1G78370	0.697928	4.62285	20.3883	1.60305e-05	0.000740998
AT5G67520	0.693828	4.569	20.6464	1.43112e-05	0.000677362
AT1G06515	0.693817	4.3675	19.0555	2.89319e-05	0.00122915
AT4G27100	0.693695	4.36135	18.4608	3.77481e-05	0.00153846
AT4G20860	0.691889	4.99755	24.468	2.75299e-06	0.000158415
AT1G67320	0.691475	3.42605	11.065	0.00119856	0.0260192
AT5G57910	0.691269	4.16704	16.9566	7.45165e-05	0.00270522
AT5G19040	0.690678	4.00451	15.3537	0.000155679	0.00498247
AT4G36880	0.68906	7.56964	42.3121	2.41137e-09	2.79428e-07
AT2G37520	0.68807	5.17719	26.285	1.28223e-06	8.00916e-05
AT3G05640	0.688043	3.77025	13.4531	0.000379537	0.0103778
AT5G57950	0.688028	3.55525	11.8907	0.000802063	0.0189279
AT1G52070	0.68802	4.1468	14.6287	0.000218196	0.00658802
AT5G01670	0.687332	3.96962	14.1211	0.000276845	0.00793804
AT2G04500	0.686923	3.28212	9.94639	0.00208114	0.0402166
AT3G54880	0.678139	4.57294	20.077	1.83882e-05	0.00083392
AT1G62510	0.673767	3.72181	12.5376	0.000587324	0.0148622
AT5G40160	0.673163	3.44447	10.3141	0.00173415	0.0349377
AT1G10682	0.671625	7.14517	38.3226	1.07153e-08	1.11829e-06
AT3G27360	0.670879	3.28138	9.5312	0.00256024	0.0470918
AT1G55130	0.669955	4.74076	20.9604	1.24705e-05	0.000605594
AT4G16990	0.669384	3.36592	9.80708	0.00223062	0.0422548
AT4G00240	0.667781	3.35342	9.92459	0.00210383	0.0406084
AT5G22020	0.667314	4.76541	21.0091	1.22076e-05	0.000594544
AT5G05060	0.667227	5.61239	28.5246	5.08146e-07	3.6102e-05
AT3G21720	0.664456	11.0695	36.381	2.24986e-08	2.19357e-06
AT3G09020	0.664403	3.48945	10.6749	0.00145138	0.030313
AT3G23790	0.661807	4.61774	18.3225	4.01659e-05	0.00161456
AT5G10870	0.661341	3.77786	12.598	0.000570559	0.0145145
AT4G11211	0.661094	6.12165	33.0612	8.20442e-08	6.89274e-06
AT1G11790	0.660578	4.00826	14.1617	0.000271618	0.00783038
AT5G19520	0.658621	4.66376	18.6756	3.42847e-05	0.00141193
AT1G16520	0.657248	4.75357	19.9378	1.95543e-05	0.000879683
AT5G61190	0.657135	5.24114	24.4997	2.71623e-06	0.000156836
AT3G23510	0.654224	6.57302	35.4522	3.2205e-08	2.97321e-06
AT1G17170	0.651384	5.20123	23.7462	3.74207e-06	0.000207855
AT5G49680	0.650959	3.88127	12.0072	0.000758147	0.0182113
AT1G33110	0.648997	3.58966	10.7352	0.00140903	0.029631
AT4G36670	0.647619	4.75284	19.9416	1.9522e-05	0.000879406
AT2G19930	0.647215	4.49816	17.6641	5.40461e-05	0.00205518
AT3G24420	0.643925	3.48344	9.91765	0.0021111	0.040702
AT5G24140	0.64381	6.27566	30.2619	2.50778e-07	1.90235e-05
AT3G09925	0.643189	4.5254	17.3376	6.26605e-05	0.00232162
AT1G67190	0.643109	3.62004	10.7281	0.00141392	0.0296782
AT2G25240	0.640139	3.53578	10.2317	0.00180637	0.0360898
AT1G14540	0.638355	3.58116	10.0911	0.0019368	0.0380398
AT1G68400	0.63808	4.46905	16.6964	8.39104e-05	0.00298709
AT5G18150	0.637817	3.89974	12.5246	0.000591009	0.014933
AT2G37230	0.637521	3.75053	11.1788	0.0011337	0.0249332
AT4G18580	0.637331	4.08726	13.7379	0.000331665	0.00928799
AT3G59370	0.636911	4.61936	18.1467	4.34709e-05	0.00172066
AT5G27120	0.63682	4.65122	18.011	4.62111e-05	0.00180363
AT3G06660	0.633889	3.47596	9.41745	0.0027104	0.0491544
AT2G22670	0.633587	7.80303	36.0204	2.58527e-08	2.46813e-06
AT1G80640	0.633372	4.06752	13.3573	0.000397197	0.010773
AT3G20380	0.633201	4.07917	11.8437	0.0008205	0.0192414
AT5G60530	0.633005	4.38917	15.8387	0.000124399	0.00418041
AT2G37620	0.631332	5.83401	27.9199	6.51294e-07	4.41265e-05
AT1G52240	0.630812	3.9387	12.4242	0.000620173	0.0155645
AT2G43040	0.629819	4.77365	18.0213	4.59956e-05	0.00179731
AT1G48270	0.62481	3.52414	9.57315	0.00250704	0.0462907
AT2G19780	0.624602	3.78535	11.1208	0.0011663	0.0254669
AT5G16990	0.624569	3.90969	11.4737	0.0009819	0.0221264
AT3G50740	0.624315	5.76526	26.2448	1.3039e-06	8.10067e-05
AT4G11120	0.624099	3.79092	11.3272	0.00105451	0.0234992
AT3G22850	0.622057	5.87158	27.396	8.08369e-07	5.32299e-05
AT3G15940	0.617839	5.79513	26.2444	1.30411e-06	8.10067e-05
AT4G29690	0.617531	5.60908	23.4529	4.24153e-06	0.000231674
AT5G48290	0.616039	4.24117	13.6793	0.000340985	0.00950151
AT4G39880	0.613932	4.00863	12.2986	0.000658782	0.0163093
AT2G34700	0.612733	4.95745	19.195	2.71877e-05	0.00117156
AT3G46200	0.612211	3.59962	9.7627	0.00228053	0.0429341
AT5G11910	0.61121	4.05612	12.0771	0.000733	0.0177212
AT5G27760	0.609084	4.3428	14.2168	0.00026467	0.00770731
AT1G26930	0.608476	3.92752	11.6343	0.000908181	0.0208751
AT4G36910	0.608374	4.36209	14.4745	0.000234534	0.00698098
AT2G35300	0.60828	4.25691	12.9289	0.000487042	0.012737
AT1G55320	0.607423	3.63847	9.47486	0.00263352	0.0481498
AT3G23990	0.601303	5.82897	23.9119	3.48688e-06	0.00019562
AT2G31360	0.599639	6.05634	26.7505	1.05631e-06	6.72298e-05
AT4G36640	0.598102	5.49257	22.4001	6.66854e-06	0.000347538
AT5G12480	0.596897	6.23758	27.6851	7.17419e-07	4.81215e-05
AT5G44380	0.594972	9.83069	37.5118	1.45868e-08	1.48542e-06
AT5G20380	0.594848	4.89397	17.8203	5.03626e-05	0.00193605
AT5G45020	0.594356	3.76197	10.0477	0.00197892	0.0387088
AT4G20780	0.593279	4.09031	11.8961	0.000799966	0.0188917
AT4G16260	0.592414	7.38979	31.04	1.83364e-07	1.43301e-05
AT3G28130	0.591444	4.61328	15.5821	0.000140051	0.00460059
AT5G38970	0.589262	4.04076	11.5822	0.000931473	0.021265
AT4G32280	0.58884	3.81012	9.89128	0.002139	0.040958
AT3G52840	0.586293	6.75655	28.7395	4.65391e-07	3.34893e-05
AT5G39865	0.585529	4.14233	11.5066	0.000966303	0.0219113
AT4G09020	0.585195	4.49514	14.2047	0.00026618	0.00773116
AT2G22770	0.584754	6.44043	27.3181	8.34812e-07	5.46859e-05
AT5G47760	0.584674	4.21182	12.5495	0.000583982	0.0148085
AT4G12980	0.584639	4.10595	11.705	0.000877571	0.0203245
AT4G30910	0.584442	5.65306	22.4555	6.5109e-06	0.000340808
AT1G12080	0.580467	10.4281	37.704	1.35562e-08	1.38467e-06
AT5G64100	0.580322	8.66656	31.9877	1.25563e-07	1.01711e-05
AT3G17840	0.579927	4.55793	14.355	0.000248039	0.00731171
AT3G57150	0.57986	5.30725	19.3176	2.57442e-05	0.00111919
AT3G14890	0.579158	3.71875	9.39695	0.00273842	0.0495078
AT5G43350	0.578625	6.50788	27.5346	7.63371e-07	5.05978e-05
AT1G64960	0.577947	4.07033	11.3147	0.00106098	0.0236277
AT1G62480	0.577891	9.24184	33.9134	5.86729e-08	5.13464e-06
AT4G37220	0.577756	3.81929	9.86544	0.0021667	0.0413705
AT5G23830	0.577325	6.08951	25.1416	2.07094e-06	0.000124053
AT1G61740	0.575962	7.63262	29.9277	2.87041e-07	2.14833e-05
AT1G47270	0.575938	4.6912	15.1308	0.000172658	0.00541249
AT1G14980	0.574679	5.22474	18.7215	3.35871e-05	0.00139173
AT4G15233	0.574375	4.19345	12.0486	0.000743137	0.0179405
AT1G12650	0.571344	3.90226	10.0261	0.00200031	0.0390045
AT4G21350	0.566575	4.0458	10.6141	0.00149548	0.0309664
AT2G46970	0.564312	5.02838	16.6433	8.59711e-05	0.00304111
AT1G59960	0.564249	4.61894	14.2799	0.000256942	0.00754767
AT5G41080	0.563784	6.69686	25.3537	1.894e-06	0.000114064
AT4G30140	0.563338	5.28046	16.6306	8.64742e-05	0.00304608
AT5G49510	0.562358	5.00994	16.4552	9.37021e-05	0.00327324
AT1G74310	0.561294	4.14105	10.4344	0.00163406	0.0332803
AT3G20370	0.561205	7.46776	28.1985	5.80833e-07	3.98344e-05
AT2G29490	0.560562	4.06245	10.1791	0.00185408	0.0368241
AT5G07460	0.559978	5.15488	16.361	9.78375e-05	0.00339301
AT5G03700	0.559074	4.30465	12.0361	0.000747657	0.0180237
AT2G21660	0.554767	8.22878	29.0137	4.16103e-07	3.03981e-05
AT3G15356	0.554443	7.80776	27.5807	7.48984e-07	4.97423e-05
AT4G37390	0.551636	5.11192	16.3016	0.000100537	0.00346618
AT2G20060	0.551235	4.16917	10.8663	0.00132115	0.0280994
AT5G10920	0.55117	4.24499	11.2223	0.00110988	0.0245202
AT3G45830	0.55058	4.93703	15.3791	0.000153859	0.0049478
AT3G46640	0.550065	5.03388	16.1171	0.000109433	0.0037335
AT1G13730	0.549234	4.54943	12.7245	0.000537019	0.01385
AT3G18080	0.547511	6.27455	23.1278	4.87534e-06	0.000262557
AT3G29075	0.547069	5.16886	16.7762	8.09064e-05	0.00290787
AT1G35580	0.545809	8.48414	27.8882	6.59857e-07	4.45271e-05
AT2G47350	0.545292	4.40903	11.93	0.000786969	0.0186503
AT2G46740	0.544078	5.34712	14.7612	0.000205098	0.00624304
AT1G55535	0.543875	4.02754	9.85602	0.00217689	0.0415413
AT3G17465	0.543814	4.00061	9.73154	0.00231627	0.0435337
AT1G29090	0.543687	4.6405	10.6289	0.00148464	0.030816
AT5G10180	0.541776	6.71426	24.7066	2.4884e-06	0.000145684
AT1G26750	0.540363	4.06995	9.84199	0.00219216	0.0417247
AT1G72130	0.539666	5.67038	19.4629	2.41343e-05	0.00105741
AT1G73480	0.537575	4.4239	11.7009	0.000879321	0.020351
AT4G02340	0.537071	5.0099	15.2855	0.000160688	0.00510391
AT1G54000	0.536053	6.79831	23.4361	4.27216e-06	0.000232684
AT2G29570	0.535842	4.17997	10.1723	0.00186027	0.0369035
AT1G66200	0.534602	9.52409	29.034	4.1268e-07	3.02797e-05
AT3G10500	0.534333	4.96122	14.8993	0.000192308	0.0059395
AT2G01940	0.534181	4.78363	13.5902	0.000355673	0.00984546
AT3G14260	0.532841	4.27654	10.6557	0.00146516	0.0305095
AT3G50660	0.532802	5.89277	19.9888	1.91185e-05	0.000864706
AT3G44150	0.531643	4.14826	10.1002	0.00192805	0.0379122
AT4G24230	0.531118	5.60046	18.3663	3.93842e-05	0.00158884
AT4G11190	0.531086	6.78693	22.0253	7.84246e-06	0.000403592
AT1G69840	0.530369	4.97855	14.6642	0.000214608	0.00649721
AT1G22360	0.52795	7.4449	24.9407	2.25409e-06	0.000134068
AT4G22290	0.527358	4.99764	14.712	0.000209864	0.00637658
AT2G31020	0.527255	4.35437	11.0199	0.00122535	0.0263622
AT1G65295	0.527079	4.53931	12.1106	0.000721234	0.0175123
AT4G17070	0.52674	4.26397	10.0549	0.00197184	0.0386377
AT5G66590	0.526157	6.38462	22.2236	7.19731e-06	0.00037325
AT5G08650	0.526079	5.34718	16.0556	0.00011257	0.00382497
AT4G23490	0.526032	4.36054	11.0133	0.00122931	0.0264306
AT1G21680	0.525565	5.78463	18.8952	3.10776e-05	0.0013022
AT2G30140	0.524671	4.26057	10.4057	0.00165742	0.0336745
AT5G45250	0.523703	4.3293	10.6022	0.00150428	0.0311085
AT3G15450	0.521386	8.15974	24.8633	2.32899e-06	0.000137246
AT4G26400	0.520484	5.43204	15.1826	0.00016855	0.00531001
AT5G16630	0.520208	4.3021	10.0242	0.00200217	0.0390045
AT5G20250	0.519417	8.20629	24.526	2.68612e-06	0.000155365
AT2G04030	0.517697	6.02429	18.2636	4.12431e-05	0.00164881
AT4G15390	0.515427	7.10672	22.6984	5.8637e-06	0.000310804
AT1G51420	0.514842	4.36436	10.4328	0.0016354	0.0332874
AT5G62760	0.511664	4.35283	10.3793	0.00167917	0.0340585
AT1G34040	0.509974	4.64607	11.92	0.000790774	0.0187141
AT3G03920	0.509655	4.6806	12.016	0.000754928	0.0181729
AT5G39860	0.509625	4.7035	11.8012	0.000837594	0.0195903
AT1G51470	0.508101	4.82486	10.5533	0.00154096	0.0316915
AT1G26800	0.50728	4.50619	10.3565	0.00169823	0.0343788
AT5G61590	0.504163	4.92651	12.997	0.00047146	0.0124165
AT5G36180	0.503916	6.31406	19.6295	2.24142e-05	0.000991089
AT4G34215	0.501779	5.04573	13.4953	0.000372018	0.0102208
AT5G17400	0.497101	4.6434	11.0416	0.00121239	0.0261673
AT2G05380	0.496024	9.67336	25.8934	1.51021e-06	9.30089e-05
AT5G19240	0.496014	4.32607	9.69207	0.00236237	0.0441881
AT2G24280	0.495819	5.44161	14.8502	0.00019676	0.00602426
AT5G23720	0.492413	5.32292	14.1611	0.000271692	0.00783038
AT3G49050	0.490748	4.68251	11.0328	0.00121764	0.0262299
AT5G46790	0.4876	4.94589	12.2511	0.00067401	0.0165813
AT2G45740	0.486542	4.56753	10.4491	0.00162224	0.03312
AT2G39890	0.485994	4.77829	11.1601	0.00114411	0.0251129
AT5G40690	0.485401	5.46923	14.7282	0.000208291	0.00633449
AT5G41800	0.485115	5.06029	12.7489	0.000530792	0.0137315
AT5G53760	0.484398	4.88837	11.4947	0.000971926	0.0219863
AT3G03470	0.483917	5.08472	12.6904	0.000545864	0.0140243
AT2G28190	0.482755	6.81304	19.7749	2.10156e-05	0.000939133
AT1G56660	0.480486	6.74695	19.1889	2.72618e-05	0.00117156
AT1G27300	0.480448	4.62245	9.90365	0.00212587	0.0408694
AT4G20830	0.478527	6.29561	18.0569	4.52648e-05	0.00177287
AT5G47950	0.4785	5.37388	13.8042	0.000321438	0.00900912
AT3G06860	0.478006	7.63504	19.7446	2.13e-05	0.000950579
AT1G73640	0.477263	4.83543	11.1919	0.00112647	0.0248067
AT5G23400	0.47404	5.16516	12.7004	0.000543258	0.0139787
AT2G20450	0.473855	4.6242	10.2118	0.00182425	0.0364039
AT3G51910	0.471583	4.8339	11.0528	0.00120577	0.0260913
AT2G03760	0.470202	4.80148	10.6728	0.00145288	0.0303255
AT3G03640	0.469889	5.98954	16.2989	0.000100662	0.00346618
AT1G02340	0.469084	6.11126	16.7483	8.19461e-05	0.00293582
AT2G27830	0.467757	5.98796	15.3306	0.000157357	0.00501231
AT1G17190	0.467373	6.73515	18.3785	3.91694e-05	0.00158589
AT4G23430	0.466825	5.66396	14.2194	0.000264348	0.00770731
AT1G14230	0.466761	5.70354	14.5114	0.000230511	0.00687949
AT2G46600	0.463291	5.15391	12.0534	0.000741423	0.017912
AT3G25230	0.462289	6.3267	16.9944	7.3243e-05	0.00266667
AT1G71740	0.461165	4.92658	10.8014	0.00136387	0.0288621
AT3G12580	0.460908	6.06536	15.6043	0.000138622	0.00456664
AT1G17650	0.460607	4.65763	9.79029	0.00224937	0.0424426
AT5G53190	0.457464	4.95739	10.8801	0.00131224	0.0279605
AT3G02770	0.455494	5.12304	11.4119	0.0010119	0.022686
AT2G43010	0.454791	5.369	11.9719	0.00077118	0.0184328
AT5G26280	0.45477	8.97462	20.6088	1.45494e-05	0.000683075
AT5G43580	0.454358	6.59799	17.3381	6.26485e-05	0.00232162
AT1G67900	0.45431	4.69705	9.69835	0.00235497	0.0441376
AT4G17460	0.454078	5.60665	13.4953	0.000372017	0.0102208
AT5G13280	0.453924	4.76411	9.90586	0.00212353	0.0408498
AT5G63140	0.453285	4.90293	10.1538	0.00187742	0.037156
AT2G33860	0.452872	4.78044	9.87498	0.00215643	0.0412447
AT1G67350	0.451147	6.17615	15.4696	0.00014754	0.00480433
AT4G16210	0.450507	5.17473	11.4118	0.00101194	0.022686
AT3G62040	0.449135	6.43936	16.2841	0.000101351	0.0034825
AT1G48260	0.447528	5.04778	10.7953	0.00136802	0.0289133
AT5G11950	0.447227	5.88336	13.3741	0.000394041	0.0106961
AT2G37190	0.445869	6.24564	15.4509	0.000148821	0.00483668
AT3G02480	0.445705	5.64925	11.9403	0.000783053	0.01861
AT4G05070	0.444919	5.81984	12.9735	0.000476777	0.0125368
AT1G27770	0.444017	6.35968	15.7141	0.000131766	0.00437549
AT5G08000	0.44254	4.97946	10.0106	0.00201575	0.0392283
AT1G30700	0.441378	5.31399	11.3469	0.00104443	0.023321
AT1G30720	0.441224	5.68058	13.0132	0.000467836	0.0123307
AT2G19760	0.439746	8.47217	18.4596	3.77691e-05	0.00153846
AT3G44320	0.438697	5.57405	12.3201	0.000652017	0.0162184
AT5G08540	0.438424	4.90389	9.83834	0.00219615	0.0417665
AT2G24580	0.438099	5.1017	10.2452	0.00179436	0.0359352
AT1G75220	0.436494	7.41059	17.0204	7.23826e-05	0.0026382
AT1G13110	0.43648	6.55681	15.7299	0.000130807	0.00435224
AT1G54990	0.435588	5.47186	11.7198	0.000871281	0.0202206
AT2G44650	0.435265	5.13707	10.2127	0.00182342	0.0364039
AT3G15630	0.433507	5.48318	11.2828	0.00107762	0.0239032
AT4G27120	0.433075	5.01501	9.80594	0.00223189	0.0422551
AT4G17870	0.431321	6.16408	13.9213	0.000304162	0.00858671
AT1G18660	0.430652	5.54883	11.8521	0.000817176	0.0192036
AT1G63680	0.43061	4.88493	9.43019	0.00269314	0.0488941
AT2G30990	0.429595	5.00993	9.67077	0.00238763	0.0445262
AT3G43800	0.427927	6.08717	13.2352	0.000420916	0.0113183
AT4G31500	0.425415	7.73552	16.3909	9.65042e-05	0.0033537
AT1G02360	0.424089	5.43231	11.0093	0.0012317	0.0264651
AT4G12110	0.423989	5.39615	11.0051	0.00123422	0.0264852
AT5G45390	0.422853	6.46647	14.5329	0.0002282	0.00682265
AT2G31980	0.422628	6.77427	12.262	0.000670496	0.0165407
AT5G59350	0.419343	5.1426	9.67834	0.00237862	0.0444076
AT5G15830	0.41805	5.4681	10.5301	0.00155874	0.0319536
AT1G21670	0.417697	5.28062	10.2428	0.00179648	0.0359564
AT1G76950	0.41643	5.40821	10.6117	0.00149725	0.0309822
AT3G13110	0.416278	5.7744	11.9085	0.000795208	0.0187925
AT2G05520	0.41613	8.605	16.5225	9.08573e-05	0.00318048
AT3G29320	0.415318	5.23514	9.62869	0.00243836	0.0452714
AT3G09850	0.414082	5.48174	10.8065	0.00136049	0.0288268
AT4G16143	0.413738	7.04303	14.8858	0.000193518	0.00596075
AT3G16450	0.413655	9.87703	18.3871	3.90187e-05	0.0015836
AT4G29840	0.412056	5.69114	11.1481	0.00115083	0.0252438
AT3G61070	0.412047	6.30001	13.4791	0.000374881	0.0102589
AT4G23870	0.411844	6.65828	14.2367	0.000262204	0.00766872
AT3G09270	0.411828	5.9584	12.2023	0.000690052	0.0169141
AT3G18410	0.411432	5.99512	12.5619	0.000580525	0.0147345
AT1G64200	0.411367	6.17623	13.1125	0.00044621	0.0118443
AT1G65590	0.408375	6.36571	13.409	0.000387562	0.0105458
AT2G05540	0.408136	7.41605	11.7539	0.000857011	0.0199583
AT3G25717	0.406129	6.02989	11.9778	0.000768981	0.0184188
AT3G62650	0.404288	6.23226	12.4309	0.000618183	0.0155262
AT3G21250	0.403829	5.69366	11.0582	0.00120259	0.0260728
AT5G37600	0.402669	7.49099	14.378	0.00024538	0.00725243
AT2G23790	0.400692	5.80857	11.1374	0.0011569	0.0253275
AT5G66650	0.398859	5.34749	9.50384	0.00259555	0.0476189
AT2G19800	0.39801	6.45158	12.1723	0.00070009	0.017073
AT2G18170	0.397336	5.34414	9.38379	0.00275656	0.0497232
AT2G22795	0.396681	6.65548	12.7061	0.000541768	0.0139511
AT5G58710	0.393903	6.50124	12.7894	0.000520602	0.0135095
AT2G17710	0.392715	7.3852	13.4804	0.000374662	0.0102589
AT1G65290	0.391807	6.62472	12.8546	0.000504636	0.0131358
AT5G63600	0.386113	7.78741	13.689	0.000339419	0.00947358
AT2G38750	0.385647	7.98172	13.6087	0.000352568	0.00978368
AT5G62680	0.38407	6.87074	12.618	0.000565111	0.0144086
AT3G01190	0.382025	7.62773	13.2143	0.000425122	0.0114016
AT1G11580	0.381652	6.92894	12.2283	0.000681445	0.016752
AT5G52840	0.380872	6.45598	11.6846	0.000886292	0.0204982
AT1G57990	0.380277	6.94575	12.4561	0.000610748	0.0153887
AT1G03230	0.379844	6.01559	10.3819	0.001677	0.0340518
AT5G58560	0.379236	5.61843	9.50351	0.00259598	0.0476189
AT1G75900	0.378218	7.08655	12.2945	0.00066007	0.01631
AT3G66654	0.376957	6.04576	10.7298	0.00141276	0.0296723
AT3G43810	0.373109	7.35986	12.2593	0.000671375	0.0165407
AT2G36410	0.37224	6.91938	11.9624	0.000774718	0.0184539
AT5G02450	0.371582	6.37216	11.146	0.00115202	0.0252535
AT4G33120	0.370259	7.32847	11.9096	0.000794785	0.0187925
AT1G70330	0.368269	6.61932	11.2211	0.00111054	0.0245202
AT5G47540	0.367798	5.90503	9.68653	0.00236891	0.0442508
AT1G68440	0.367338	6.9719	11.6568	0.000898332	0.0207054
AT1G47420	0.366544	6.90525	11.5711	0.00093647	0.0213501
AT2G31570	0.365481	7.70714	12.173	0.000699857	0.017073
AT2G37710	0.364011	5.97677	9.80902	0.00222847	0.0422378
AT3G23800	0.362826	6.41621	10.3378	0.00171393	0.0346342
AT1G68560	0.362483	8.81621	12.9503	0.000482083	0.0126381
AT4G21410	0.361717	6.14635	9.94736	0.00208014	0.0402166
AT2G43610	0.361572	6.31545	9.64803	0.00241491	0.0449353
AT5G15090	0.361567	7.12408	11.4753	0.000981126	0.0221264
AT3G52300	0.361546	8.1796	12.3356	0.000647152	0.0161332
AT1G66580	0.357364	6.74749	10.7418	0.0014044	0.0295522
AT1G45201	0.357231	8.18555	11.508	0.00096566	0.0219113
AT3G55750	0.356513	6.04599	9.50054	0.00259984	0.0476638
AT5G20080	0.356319	6.31707	9.91305	0.00211594	0.040772
AT3G51330	0.350388	6.68461	10.1086	0.00191999	0.0377759
AT4G09800	0.350208	6.77344	10.4345	0.00163395	0.0332803
AT4G16980	0.347787	8.24038	11.1211	0.00116612	0.0254669
AT3G46600	0.346232	6.33097	9.46953	0.00264056	0.0481884
AT5G19230	0.346071	6.85527	10.0103	0.00201608	0.0392283
AT1G54030	0.344653	7.10173	10.1526	0.00187856	0.0371565
AT5G22920	0.342252	6.53912	9.53832	0.00255112	0.0469498
AT5G20500	0.341976	6.36649	9.37599	0.00276738	0.0498915
AT5G07010	0.338462	7.5582	10.1164	0.00191264	0.0376754
AT1G80920	0.337031	7.51399	10.0253	0.0020011	0.0390045
AT3G11340	0.336685	7.54613	9.97911	0.00204755	0.0397045
AT5G28020	0.333111	6.78708	9.46246	0.00264993	0.048266
AT3G02260	0.33194	6.87519	9.39638	0.00273921	0.0495078
AT2G16600	0.331706	8.21716	10.2708	0.00177173	0.0355668
AT3G44310	0.324585	9.57102	11.0245	0.00122258	0.0263195
AT2G45180	0.319584	9.7233	10.2848	0.00175949	0.0353633
AT4G23100	0.318767	8.18235	9.54375	0.0025442	0.0468738
AT3G15950	0.316304	10.2258	11.0984	0.00117918	0.0256814

## Sheet: down-regulated in ino80-8
Supplementary File 7: Differentially regulated genes in untreated ino80-8, een-2 and arp5-1 seedlings
edgeR Col-0 vs ino80-8
up-regulated genes in ino80-8
GeneID	logFC	logCPM	F	PValue	FDR
AT3G26520	-0.254566	13.0011	9.46554	0.00264584	0.0482439
AT5G53460	-0.300883	9.78276	9.55973	0.00252393	0.0465259
AT5G60660	-0.302175	9.53142	9.47922	0.00262776	0.0480708
AT3G48990	-0.314405	10.0104	10.7898	0.00137172	0.0289734
AT5G43760	-0.31458	8.49125	9.54087	0.00254786	0.0469156
AT3G14067	-0.319029	8.67082	9.97542	0.00205131	0.0397315
AT1G20110	-0.328713	7.1516	9.42698	0.00269748	0.0489465
AT4G11320	-0.330129	8.96531	10.7158	0.0014225	0.0298024
AT4G23670	-0.332661	11.6058	13.4168	0.000386127	0.0105152
AT1G64640	-0.333004	7.51573	9.79644	0.00224249	0.0423365
AT4G32460	-0.333937	9.36025	11.2787	0.00107976	0.023935
AT5G17330	-0.335667	8.43089	10.7745	0.00138202	0.0291725
AT1G09750	-0.336534	7.60668	9.8962	0.00213377	0.0409376
AT5G62000	-0.337878	7.61409	10.2069	0.00182871	0.0364495
AT1G01470	-0.338624	6.68462	9.62122	0.00244749	0.0453423
AT4G27000	-0.34259	7.01863	10.2354	0.00180308	0.0360491
AT1G15750	-0.34275	7.58879	10.6636	0.0014595	0.0304258
AT4G34350	-0.343416	6.96339	9.60215	0.00247094	0.0456994
AT3G11170	-0.344903	6.52265	9.70876	0.00234276	0.0439578
AT5G11670	-0.345815	7.80977	10.7509	0.00139817	0.0294764
AT5G23660	-0.348093	6.24768	9.46284	0.00264942	0.048266
AT4G38350	-0.348423	6.77124	10.379	0.00167941	0.0340585
AT1G28240	-0.35119	6.33817	9.89571	0.00213429	0.0409376
AT2G45620	-0.351866	6.43952	10.0638	0.00196319	0.0384907
AT3G18050	-0.352434	6.3213	9.82685	0.00220875	0.0419351
AT1G70890	-0.35437	7.93908	11.6164	0.00091613	0.0210062
AT1G06040	-0.354452	7.00089	10.8726	0.00131708	0.0280308
AT5G02840	-0.354859	6.41225	10.2753	0.00176781	0.0355095
AT4G35800	-0.355616	6.96728	10.9439	0.00127181	0.0272571
AT5G56980	-0.359215	7.07235	11.2334	0.00110387	0.024405
AT4G02290	-0.359528	7.8297	11.6052	0.000921099	0.0210855
AT5G01020	-0.360404	6.10819	9.84978	0.00218366	0.041607
AT5G16110	-0.360924	7.50549	11.6741	0.000890823	0.0205846
AT1G26110	-0.36116	8.07053	12.2137	0.000686282	0.0168463
AT3G08590	-0.362054	7.18335	11.5768	0.000933921	0.0213064
AT5G54310	-0.363226	7.00031	11.4819	0.000977983	0.0220868
AT1G07110	-0.363274	6.11757	9.95074	0.00207665	0.040176
AT3G13460	-0.364283	7.81435	12.2137	0.000686283	0.0168463
AT3G52140	-0.3648	6.33356	10.5978	0.00150754	0.0311412
AT2G17840	-0.364841	7.65913	12.0906	0.000728234	0.0176314
AT3G48360	-0.365518	6.62545	11.1124	0.00117111	0.0255553
AT3G11420	-0.366711	5.81287	9.52132	0.00257293	0.0472735
AT1G64650	-0.367173	6.80227	10.3409	0.00171129	0.0346017
AT2G46820	-0.369915	6.48385	10.4614	0.00161241	0.0329592
AT2G16500	-0.370602	6.12726	10.614	0.00149557	0.0309664
AT5G16910	-0.372923	6.14786	10.6854	0.00144395	0.0301953
AT4G12510	-0.373012	7.20253	12.2962	0.000659555	0.0163093
AT1G29120	-0.373496	6.01825	10.2036	0.00183167	0.0364651
AT5G19740	-0.373777	6.28732	10.8129	0.00135625	0.0287551
AT4G14130	-0.37418	9.05479	11.4712	0.000983095	0.0221279
AT5G64940	-0.374324	6.05991	10.1338	0.00189618	0.037395
AT2G37220	-0.374743	8.19026	12.6103	0.000567214	0.0144513
AT1G25550	-0.374799	6.15425	10.6504	0.00146903	0.0305488
AT2G35370	-0.374961	6.21613	9.62473	0.0024432	0.0453362
AT4G16380	-0.377367	7.26163	12.3972	0.000628289	0.0157167
AT2G42600	-0.378037	6.61969	11.4967	0.000970995	0.0219863
AT1G66180	-0.379294	7.66765	13.0815	0.000452861	0.0120114
AT5G13390	-0.380315	5.97428	10.5292	0.00155941	0.0319536
AT5G42100	-0.380786	6.35652	11.6158	0.000916386	0.0210062
AT3G23820	-0.380816	8.17669	13.6538	0.000345119	0.00960872
AT5G43330	-0.381568	6.1063	11.0486	0.00120826	0.0261117
AT1G19350	-0.382083	7.61396	13.1912	0.00042981	0.0114815
AT3G63210	-0.382384	6.88356	11.6717	0.000891865	0.0205846
AT5G24670	-0.383468	5.66014	9.65348	0.00240835	0.0448628
AT1G34110	-0.384191	5.97666	10.5867	0.00151583	0.0312512
AT2G23120	-0.386938	6.42685	11.9718	0.00077121	0.0184328
AT4G02510	-0.387041	7.67341	12.0955	0.000726523	0.0176153
AT4G08950	-0.388226	7.64655	13.2466	0.000418646	0.0112729
AT2G43680	-0.388513	7.97923	13.9691	0.000297386	0.00843347
AT1G35720	-0.389068	8.96999	15.0256	0.000181317	0.00563661
AT5G02790	-0.390749	5.93364	10.3347	0.00171661	0.0346467
AT2G42010	-0.392793	6.52128	12.5305	0.000589323	0.0149016
AT2G38380	-0.394665	7.04215	13.584	0.000356721	0.00985822
AT5G07740	-0.395116	6.43741	12.1914	0.000693687	0.0169661
AT5G01990	-0.396482	5.497	9.78594	0.00225426	0.042511
AT5G51300	-0.397918	6.14595	12.2606	0.000670957	0.0165407
AT1G23800	-0.398039	6.77645	13.4958	0.000371936	0.0102208
AT2G36910	-0.398784	6.81623	13.5058	0.000370182	0.0102051
AT5G01960	-0.399556	5.57837	10.423	0.00164332	0.0334284
AT3G18990	-0.401084	5.79052	11.2626	0.00108825	0.0241073
AT2G33790	-0.401606	6.03719	11.8477	0.00081894	0.0192182
AT1G67730	-0.40207	7.72701	14.6746	0.000213564	0.00647727
AT1G07080	-0.403006	7.08361	14.1733	0.000270134	0.00781226
AT5G51150	-0.403966	5.37527	9.49296	0.00260974	0.0478191
AT1G78970	-0.404675	6.27552	12.7579	0.000528512	0.0136831
AT3G28200	-0.405083	6.23464	12.5483	0.000584321	0.0148085
AT2G26355	-0.405491	5.31577	9.75753	0.00228643	0.043021
AT2G22470	-0.405905	7.66696	13.8557	0.000313729	0.0088151
AT5G53660	-0.406121	5.66574	10.1476	0.00188323	0.0372072
AT2G30520	-0.406192	5.94427	11.5985	0.000924128	0.0211405
AT1G75180	-0.40832	5.39358	10.1475	0.00188333	0.0372072
AT4G23700	-0.409771	6.58189	14.0333	0.000288528	0.00822652
AT3G49360	-0.409919	5.68524	11.4052	0.00101517	0.0227432
AT2G39400	-0.410034	5.1425	9.39777	0.0027373	0.0495078
AT2G38080	-0.412224	5.82354	11.8029	0.000836881	0.0195903
AT3G17510	-0.413013	5.66147	11.4833	0.000977325	0.0220868
AT5G03760	-0.413249	6.99078	14.8466	0.000197092	0.00602665
AT1G76460	-0.413912	5.78056	11.8868	0.000803565	0.0189279
AT5G53370	-0.414336	6.41562	13.6423	0.000347002	0.00965313
AT2G45160	-0.416068	5.19445	9.89351	0.00213663	0.0409449
AT5G51890	-0.416666	6.04323	13.1551	0.000437252	0.0116408
AT2G18280	-0.417851	8.38549	16.7049	8.35844e-05	0.00298098
AT3G56910	-0.418941	6.47628	13.4904	0.000372881	0.0102208
AT5G56140	-0.419503	5.9733	13.0387	0.000462199	0.0122205
AT4G18020	-0.419539	5.15326	9.7968	0.00224209	0.0423365
AT5G17460	-0.4196	5.43607	10.8029	0.00136289	0.0288595
AT1G07720	-0.419676	7.33258	15.6331	0.000136788	0.00451548
AT5G16390	-0.421035	6.55497	14.2537	0.000260118	0.00762099
AT3G56590	-0.421486	6.3439	13.9139	0.000305229	0.00859785
AT4G25080	-0.422536	6.53252	13.387	0.000391631	0.0106479
AT3G18035	-0.423376	6.33618	14.1614	0.000271649	0.00783038
AT5G51670	-0.424599	5.42896	11.0348	0.00121641	0.0262203
AT5G20840	-0.425594	5.76298	12.6417	0.000558738	0.0142895
AT4G36850	-0.426301	5.31188	9.5109	0.00258638	0.0474948
AT3G17770	-0.427084	5.08257	10.0708	0.00195641	0.0384025
AT4G18120	-0.428482	6.16278	14.1934	0.000267591	0.00775875
AT2G01190	-0.430492	6.65247	15.358	0.000155371	0.00497735
AT1G26440	-0.431305	5.54003	12.0938	0.000727109	0.0176168
AT2G41530	-0.431899	6.39875	15.1702	0.000169522	0.00532909
AT1G49570	-0.432108	6.6807	15.7619	0.000128886	0.00429555
AT2G26330	-0.43348	6.88726	15.2778	0.000161261	0.00511726
AT1G05890	-0.433723	6.68825	15.5982	0.000139015	0.00457103
AT5G20050	-0.434264	5.02212	10.1757	0.00185715	0.0368633
AT3G14370	-0.434498	6.22774	14.1043	0.000279052	0.00798768
AT3G43670	-0.436084	6.70831	16.1195	0.000109309	0.00373306
AT5G11720	-0.436185	6.04481	14.2221	0.000264011	0.00770731
AT5G51210	-0.436213	5.25694	10.8825	0.00131067	0.0279473
AT1G17200	-0.437126	5.76513	13.2877	0.000410547	0.0110815
AT5G66200	-0.437831	6.3139	15.3336	0.000157137	0.00501219
AT5G64260	-0.438684	9.45523	19.5505	2.32142e-05	0.00102377
AT2G40280	-0.438726	5.13585	10.7169	0.00142173	0.0298024
AT3G14415	-0.439128	6.86344	15.1711	0.000169453	0.00532909
AT1G48650	-0.439186	4.79785	9.57492	0.00250482	0.0462752
AT5G51180	-0.439498	4.78869	9.48344	0.00262221	0.0479954
AT3G21560	-0.439794	5.00267	10.3535	0.00170067	0.0344075
AT3G54580	-0.439807	8.69839	18.8031	3.23829e-05	0.00134349
AT3G07430	-0.440202	4.97433	10.2078	0.00182783	0.0364495
AT2G46220	-0.44226	5.76303	12.9488	0.000482424	0.0126381
AT5G65390	-0.442396	8.43923	17.9423	4.76647e-05	0.00184147
AT3G01480	-0.442978	5.19537	11.1928	0.00112597	0.0248067
AT4G28300	-0.443011	7.36463	17.2037	6.65922e-05	0.00245107
AT4G21960	-0.44343	10.7118	22.7874	5.64316e-06	0.000301972
AT2G24790	-0.444187	6.75591	15.6333	0.000136779	0.00451548
AT4G00560	-0.444759	4.90742	9.89306	0.0021371	0.0409449
AT5G62350	-0.44552	7.07752	16.1834	0.000106145	0.00362869
AT3G11200	-0.445666	5.99978	14.8713	0.000194834	0.00598481
AT2G12462	-0.447215	5.15923	11.0396	0.00121356	0.0261756
AT1G49340	-0.447702	6.49208	16.5433	8.9997e-05	0.00315365
AT4G18670	-0.447757	7.1544	16.87	7.7516e-05	0.00280099
AT4G26870	-0.447816	5.40919	12.3101	0.000655141	0.0162664
AT3G15210	-0.448226	4.86409	10.2352	0.00180326	0.0360491
AT3G55800	-0.448917	6.75229	14.7946	0.00020193	0.00616336
AT5G10430	-0.449265	10.2833	20.308	1.66074e-05	0.000762421
AT2G30570	-0.449338	7.04158	15.7604	0.000128975	0.00429555
AT5G55480	-0.449712	6.67393	16.9808	7.36998e-05	0.00268039
AT1G33230	-0.450054	5.33977	12.3217	0.000651495	0.0162174
AT4G00230	-0.450598	4.78576	10.0282	0.00199817	0.0390045
AT3G58490	-0.451196	5.40189	12.6297	0.000561959	0.01435
AT1G65845	-0.451741	4.95905	9.69296	0.00236132	0.0441881
AT5G06839	-0.451893	4.9161	10.5976	0.00150772	0.0311412
AT2G28800	-0.451978	7.56739	16.8979	7.65368e-05	0.00277456
AT5G13650	-0.45209	6.1148	15.4745	0.000147204	0.00479805
AT2G25970	-0.452102	6.88778	17.5933	5.58037e-05	0.0021118
AT1G05830	-0.452616	5.53633	13.2669	0.000414621	0.0111824
AT1G09090	-0.452798	4.67195	9.47191	0.0026374	0.0481884
AT2G20890	-0.45285	6.85543	17.3965	6.10105e-05	0.0022705
AT3G12320	-0.453286	5.1915	11.7634	0.000853052	0.0199075
AT3G22120	-0.453745	7.554	15.9002	0.000120925	0.0040759
AT5G14920	-0.454334	7.64747	18.3673	3.93669e-05	0.00158884
AT5G38560	-0.454858	5.69564	13.6367	0.000347922	0.00967074
AT2G34020	-0.454999	6.62006	17.4227	6.02889e-05	0.00224613
AT1G64530	-0.455053	4.95879	10.9261	0.00128294	0.0274607
AT3G63200	-0.456046	6.22409	15.8258	0.000125145	0.00419292
AT4G06744	-0.456095	6.1021	15.817	0.00012565	0.00420565
AT1G29670	-0.456206	7.847	19.1663	2.75376e-05	0.00118187
AT1G27200	-0.456485	5.04104	11.3651	0.00103524	0.0231464
AT3G57630	-0.45682	4.69891	9.46892	0.00264136	0.0481884
AT1G68710	-0.457515	5.55904	13.3839	0.000392214	0.0106551
AT5G04810	-0.457671	6.12348	14.4032	0.000242498	0.00717354
AT5G65630	-0.458117	6.64188	17.7628	5.16875e-05	0.0019765
AT2G41640	-0.45818	4.85342	10.5466	0.00154604	0.0317572
AT2G28840	-0.458201	8.52505	19.0223	2.93635e-05	0.00124301
AT2G02780	-0.459063	5.91785	15.3327	0.000157204	0.00501219
AT2G23030	-0.459684	4.76586	10.1613	0.00187052	0.0370412
AT3G19290	-0.460146	5.53066	13.4991	0.000371352	0.0102208
AT5G19860	-0.461266	7.33481	18.8853	3.12151e-05	0.00130633
AT5G06630	-0.461894	5.18776	10.7327	0.00141072	0.029648
AT4G39900	-0.461928	5.43672	12.3045	0.000656906	0.0162797
AT5G38420	-0.46251	9.76282	20.4605	1.55289e-05	0.000724791
AT3G48870	-0.462663	6.89157	18.1118	4.41582e-05	0.00174375
AT1G22910	-0.462783	6.44453	17.1154	6.93188e-05	0.00254308
AT1G54500	-0.462855	4.94925	11.0502	0.0012073	0.0261076
AT5G44190	-0.462872	5.19621	12.3372	0.00064666	0.0161329
AT1G06430	-0.463594	4.76577	9.99473	0.00203172	0.039443
AT2G35940	-0.463688	5.31252	12.9108	0.000491264	0.0128175
AT1G01320	-0.46384	7.07072	17.5157	5.78001e-05	0.00217025
AT1G28660	-0.464096	7.59896	19.4148	2.46563e-05	0.00107607
AT3G20100	-0.465198	4.92152	11.1818	0.00113204	0.024913
AT4G27710	-0.465912	5.40009	13.2297	0.000422019	0.0113274
AT2G45830	-0.466535	4.6137	9.93165	0.00209646	0.0404893
AT5G66190	-0.466858	5.85522	14.1422	0.000274119	0.00788127
AT4G28240	-0.467144	6.05025	15.7876	0.000127365	0.00425036
AT4G20070	-0.467451	5.11404	11.0074	0.00123285	0.0264728
AT5G60580	-0.467898	5.51251	13.9946	0.000293835	0.00834686
AT2G35060	-0.469487	5.63637	14.5409	0.000227354	0.00680948
AT3G63000	-0.469694	5.48181	14.0125	0.000291375	0.00829802
AT1G68190	-0.470338	4.6496	9.63802	0.00242702	0.0451356
AT2G45970	-0.470382	5.78011	15.4337	0.000150015	0.00485671
AT3G23810	-0.47058	7.60474	19.8312	2.04985e-05	0.000920927
AT5G60170	-0.470813	6.18642	17.2978	6.38056e-05	0.00235634
AT5G12350	-0.471311	5.49178	14.2057	0.000266049	0.00773116
AT3G27850	-0.472009	7.00469	18.6566	3.4577e-05	0.00142049
AT1G72410	-0.473487	6.07792	16.6329	8.63801e-05	0.00304596
AT3G14690	-0.473498	5.55195	13.8827	0.000309749	0.00871056
AT4G08150	-0.473907	6.64688	19.0142	2.94701e-05	0.00124571
AT2G04842	-0.474443	4.87993	10.4723	0.00160377	0.0328025
AT4G12570	-0.475537	4.78264	10.9218	0.00128564	0.027501
AT3G17790	-0.47556	4.80916	11.0599	0.00120158	0.0260679
AT4G13340	-0.475602	6.84397	18.9315	3.05782e-05	0.00128769
AT4G27600	-0.476024	5.53798	14.5334	0.00022815	0.00682265
AT2G32230	-0.476091	5.03959	12.3075	0.000655961	0.0162683
AT5G12860	-0.477069	7.0344	19.4035	2.47794e-05	0.00108004
AT2G40510	-0.477633	5.87377	16.0416	0.0001133	0.0038459
AT3G44100	-0.477901	5.83234	15.8274	0.000125051	0.00419292
AT4G37800	-0.478105	7.13645	19.1915	2.72303e-05	0.00117156
AT1G02810	-0.478326	4.78924	11.2879	0.00107493	0.0238751
AT5G65990	-0.478582	5.09181	12.5989	0.000570324	0.0145145
AT1G01600	-0.479427	5.03954	12.4346	0.000617089	0.0155103
AT2G38540	-0.480262	6.47926	16.9558	7.45434e-05	0.00270522
AT3G21690	-0.481166	4.65223	10.3359	0.00171553	0.0346457
AT5G19530	-0.482636	4.90673	12.0091	0.000757442	0.0182113
AT1G15030	-0.483093	4.75377	11.1346	0.00115845	0.025345
AT5G15180	-0.483805	5.54014	14.7876	0.000202592	0.00617795
AT3G18530	-0.483833	5.25098	12.7292	0.000535823	0.0138404
AT1G80300	-0.484135	5.99517	15.8688	0.000122684	0.00412693
AT5G64430	-0.484324	6.45521	19.1529	2.7703e-05	0.00118594
AT3G48970	-0.484366	6.75009	19.7287	2.14503e-05	0.000956016
AT4G13010	-0.484532	4.9864	12.1143	0.000719962	0.0174941
AT4G30210	-0.486767	7.11111	19.9622	1.93452e-05	0.000872613
AT3G03520	-0.489469	5.70839	16.4181	9.5307e-05	0.00331895
AT1G29350	-0.490019	4.59651	10.5883	0.00151461	0.0312452
AT5G62900	-0.490492	4.41345	9.60732	0.00246456	0.0456317
AT3G15880	-0.491017	5.94569	17.388	6.12446e-05	0.00227669
AT1G13250	-0.493235	4.59631	10.747	0.00140085	0.0294959
AT1G62750	-0.49325	6.27533	16.2774	0.00010166	0.00348956
AT3G01290	-0.493854	6.53062	20.1704	1.76459e-05	0.000804599
AT3G32980	-0.494172	10.2534	26.3855	1.22958e-06	7.72336e-05
AT3G48520	-0.495243	4.62892	11.2437	0.00109836	0.0242992
AT4G38770	-0.495985	10.9302	28.4299	5.2825e-07	3.72156e-05
AT2G24180	-0.496814	5.62138	16.3881	9.66276e-05	0.00335452
AT1G30490	-0.496902	4.66974	11.6105	0.000918722	0.0210454
AT5G06760	-0.497188	6.12213	14.442	0.000238133	0.00706932
AT3G15360	-0.497236	4.81434	12.1626	0.00070339	0.0171282
AT3G01770	-0.49742	6.03605	17.7623	5.16988e-05	0.0019765
AT3G13290	-0.497474	5.01879	13.2347	0.000421004	0.0113183
AT1G34630	-0.498068	6.12577	18.1412	4.35781e-05	0.00172287
AT5G22740	-0.498492	6.24794	19.0909	2.84786e-05	0.0012145
AT5G20630	-0.499229	8.35456	20.8827	1.29025e-05	0.000622972
AT4G25100	-0.499861	8.02791	20.3977	1.59643e-05	0.000739972
AT5G64840	-0.500134	6.06095	17.9798	4.68639e-05	0.00182228
AT4G12880	-0.500722	7.42992	22.148	7.43661e-06	0.000383951
AT3G26510	-0.500885	7.50897	19.534	2.33849e-05	0.0010286
AT3G14100	-0.501634	6.55573	20.6255	1.44427e-05	0.000681667
AT3G09220	-0.502838	6.17014	19.4674	2.40861e-05	0.00105668
AT3G55020	-0.503326	6.30862	19.7783	2.09844e-05	0.000938988
AT3G18535	-0.505134	4.64016	11.8214	0.000829444	0.0194376
AT5G03280	-0.505296	7.64632	22.6208	6.06281e-06	0.000319343
AT3G47470	-0.506006	8.50178	20.5566	1.48866e-05	0.00069772
AT1G53470	-0.506144	5.07276	14.1418	0.000274162	0.00788127
AT2G28470	-0.506813	7.93686	23.8311	3.60894e-06	0.000201794
AT1G61890	-0.508322	7.06374	22.583	6.16251e-06	0.000324086
AT2G22490	-0.50841	4.42097	10.8512	0.00133095	0.0282722
AT3G23700	-0.508517	4.93305	13.4381	0.000382244	0.0104348
AT1G77590	-0.508665	4.74026	12.3093	0.000655401	0.0162664
AT1G71950	-0.510988	5.10256	14.2113	0.000265349	0.00772038
AT5G17420	-0.51114	5.22868	15.2565	0.000162865	0.00515843
AT1G20880	-0.512169	4.54946	11.4135	0.00101108	0.022686
AT4G22360	-0.51225	4.20493	9.85404	0.00217903	0.0415586
AT3G29240	-0.512399	7.35492	18.0629	4.51429e-05	0.00177223
AT3G21230	-0.513249	4.62026	12.0039	0.000759366	0.0182275
AT4G03280	-0.514201	6.82723	20.2511	1.70288e-05	0.000778576
AT3G55360	-0.514561	7.39987	23.4506	4.24559e-06	0.000231674
AT1G80240	-0.516746	6.24976	21.1005	1.17291e-05	0.00057457
AT5G65660	-0.517073	7.53888	23.7222	3.78049e-06	0.000209297
AT5G66080	-0.517868	4.86995	12.9007	0.000493648	0.0128697
AT4G27410	-0.520134	5.73436	17.9836	4.67843e-05	0.00182228
AT2G47400	-0.520188	6.90241	16.8763	7.72951e-05	0.00279602
AT4G34480	-0.520517	4.85873	13.4344	0.000382924	0.0104449
AT5G52440	-0.523345	5.84977	19.1117	2.82164e-05	0.00120484
AT3G62090	-0.523704	4.25872	10.3654	0.00169071	0.0342473
AT1G03630	-0.524665	4.90671	13.7313	0.000332709	0.00930949
AT5G65760	-0.524936	4.72422	13.0274	0.000464691	0.012267
AT1G06680	-0.52506	8.27894	21.3547	1.04973e-05	0.000523384
AT5G53580	-0.525336	4.65554	12.4221	0.000620802	0.0155687
AT5G17010	-0.525417	4.19639	10.1659	0.00186626	0.0370004
AT5G06640	-0.526095	6.59013	20.5114	1.51857e-05	0.000710744
AT4G09650	-0.526321	6.23696	20.1092	1.81292e-05	0.0008244
AT3G48200	-0.528258	4.37894	11.2965	0.00107043	0.0237908
AT3G54890	-0.52865	6.91392	20.9791	1.23688e-05	0.000601526
AT1G78230	-0.530161	5.83664	19.706	2.16671e-05	0.000964403
AT3G60070	-0.532356	5.1771	15.9847	0.000116304	0.00393991
AT5G06530	-0.532615	4.28018	10.8411	0.00133756	0.0283947
AT1G80940	-0.533121	4.75986	13.8295	0.000317633	0.00891221
AT4G17550	-0.533172	4.02433	9.40684	0.00272487	0.0493369
AT4G01050	-0.534121	6.94257	21.5168	9.78126e-06	0.000492065
AT2G30700	-0.53446	5.07025	15.3206	0.000158092	0.00503095
AT1G25390	-0.535332	3.98274	9.4696	0.00264046	0.0481884
AT5G52820	-0.535563	4.33394	11.2167	0.00111294	0.024557
AT1G10570	-0.536894	4.35176	10.5827	0.00151882	0.0312937
AT1G01060	-0.540263	7.07697	24.4844	2.73385e-06	0.000157583
AT5G38410	-0.541012	9.25048	27.2363	8.63564e-07	5.62404e-05
AT4G26850	-0.541357	6.66337	23.7623	3.71635e-06	0.000206768
AT2G45250	-0.54153	4.45111	12.1936	0.000692957	0.0169661
AT3G63160	-0.541745	5.4247	16.3943	9.63513e-05	0.00335185
AT1G35420	-0.542452	4.36459	9.92135	0.00210722	0.0406505
AT1G61360	-0.543156	4.17317	10.5952	0.00150951	0.0311592
AT3G63540	-0.543185	5.19632	15.182	0.000168599	0.00531001
AT5G37500	-0.543656	4.8804	15.1353	0.000172296	0.00540616
AT5G05760	-0.543969	4.02504	9.84149	0.0021927	0.0417247
AT1G09540	-0.544018	4.58388	13.206	0.00042679	0.0114262
AT3G62700	-0.546745	7.61262	27.1485	8.95528e-07	5.7985e-05
AT1G22430	-0.546999	4.73563	13.2047	0.000427059	0.0114262
AT4G15560	-0.54745	7.58238	25.5899	1.71509e-06	0.000104224
AT3G26470	-0.547578	4.4874	12.5464	0.000584854	0.0148109
AT5G55960	-0.548283	6.10671	22.7206	5.80775e-06	0.000308812
AT4G34220	-0.549289	4.91798	15.6024	0.000138745	0.00456664
AT2G39190	-0.549332	5.07712	16.3359	9.89707e-05	0.00342524
AT3G24480	-0.549476	6.61639	23.5875	4.00439e-06	0.000220454
AT4G20380	-0.549615	5.60468	18.863	3.15281e-05	0.00131452
AT2G36080	-0.550309	5.22797	17.5502	5.69047e-05	0.00214622
AT1G06190	-0.550339	4.71751	13.9273	0.000303302	0.00857952
AT4G25700	-0.550978	5.12035	16.7316	8.25728e-05	0.00295198
AT3G44990	-0.551962	7.91509	27.3021	8.40365e-07	5.49425e-05
AT4G00150	-0.552523	5.7865	21.2915	1.07907e-05	0.000534841
AT5G53170	-0.552555	5.81291	21.1711	1.1373e-05	0.00055794
AT2G26500	-0.55351	5.90408	20.3324	1.64302e-05	0.000756353
AT4G17950	-0.55392	4.35122	11.9813	0.00076769	0.0184131
AT5G49700	-0.55407	4.94144	15.6397	0.000136374	0.00451391
AT3G54660	-0.554214	6.35416	24.2711	2.99279e-06	0.000170462
AT1G73170	-0.554259	4.56886	13.6054	0.00035312	0.00978489
AT4G04692	-0.554562	5.66268	19.1588	2.763e-05	0.00118432
AT3G57470	-0.555086	5.01428	15.9804	0.000116535	0.00394375
AT1G58030	-0.55558	8.1922	28.3829	5.38526e-07	3.7624e-05
AT2G44300	-0.555912	4.44122	12.6573	0.000554585	0.0142157
AT1G26460	-0.556202	4.5782	13.9202	0.000304323	0.00858671
AT5G46240	-0.557123	4.34785	12.3372	0.000646659	0.0161329
AT3G53980	-0.557643	7.75642	27.6413	7.30514e-07	4.87082e-05
AT3G47730	-0.557713	6.18235	23.9736	3.39641e-06	0.000191826
AT4G03205	-0.560362	4.33236	10.8945	0.00130296	0.0278075
AT2G19710	-0.561576	4.44865	13.1446	0.000439448	0.0116833
AT1G23740	-0.562959	4.03026	9.63423	0.00243162	0.0451962
AT4G16140	-0.563059	4.28769	11.7597	0.000854579	0.0199252
AT4G18780	-0.563481	4.59052	14.152	0.000272858	0.00785723
AT4G02260	-0.563982	4.6894	14.557	0.000225648	0.00677649
AT5G46110	-0.566992	7.31496	24.9779	2.21896e-06	0.000132213
AT3G02065	-0.56706	3.87747	10.0084	0.00201793	0.0392283
AT4G35300	-0.568803	5.713	21.9161	8.22291e-06	0.000421879
AT4G31140	-0.570091	4.68615	14.8365	0.000198021	0.00604953
AT4G37330	-0.571169	5.55471	20.4907	1.53247e-05	0.000716253
AT2G33380	-0.572054	4.7616	13.4227	0.000385059	0.0104947
AT1G76410	-0.572375	3.81662	9.88345	0.00214736	0.0410945
AT5G58330	-0.572699	5.8191	21.4185	1.02092e-05	0.000509778
AT4G28040	-0.572742	7.23914	28.6578	4.81201e-07	3.44059e-05
AT1G54220	-0.572955	4.13334	11.673	0.000891264	0.0205846
AT1G15290	-0.573591	5.55444	18.9247	3.06717e-05	0.00129002
AT5G55180	-0.576778	5.15043	17.9418	4.76737e-05	0.00184147
AT1G28260	-0.57727	5.16314	18.8102	3.2281e-05	0.0013417
AT1G01790	-0.577392	5.00082	17.3512	6.22769e-05	0.0023125
AT1G60790	-0.577762	4.07294	11.6197	0.00091465	0.0209951
AT3G51390	-0.577911	4.06618	11.591	0.000927463	0.0212023
AT5G57700	-0.579648	4.57193	15.0201	0.000181785	0.00564593
AT1G32990	-0.580367	5.74177	22.3994	6.67049e-06	0.000347538
AT4G32040	-0.581276	5.52921	21.5009	9.84931e-06	0.000494748
AT3G11410	-0.581871	6.00819	23.9551	3.42331e-06	0.000193021
AT5G37260	-0.582755	6.69689	28.5116	5.1085e-07	3.61972e-05
AT1G60950	-0.583045	7.4749	27.4578	7.87972e-07	5.20232e-05
AT1G05340	-0.583193	4.87009	16.4238	9.50586e-05	0.00331374
AT1G05010	-0.585731	6.68145	28.3958	5.3568e-07	3.75814e-05
AT5G61910	-0.586405	4.26556	13.2049	0.000427013	0.0114262
AT3G13490	-0.586408	4.52036	14.9203	0.000190431	0.00589268
AT2G47630	-0.587007	5.90029	24.2786	2.98332e-06	0.000170211
AT3G10490	-0.588852	5.01461	18.0737	4.49233e-05	0.00177189
AT5G14640	-0.589152	5.44701	21.5293	9.72793e-06	0.000490115
AT4G07507	-0.589186	3.70171	9.44584	0.00267209	0.048617
AT3G18680	-0.589398	4.92432	18.0634	4.51329e-05	0.00177223
AT2G47800	-0.589414	5.8484	24.5996	2.60365e-06	0.000151376
AT4G32260	-0.590364	7.32224	27.2441	8.6076e-07	5.61667e-05
AT5G57240	-0.590566	6.39269	26.731	1.06486e-06	6.7646e-05
AT3G14850	-0.59138	4.66792	15.4421	0.00014943	0.00484242
AT2G33800	-0.593952	7.05944	29.7511	3.08327e-07	2.30252e-05
AT1G49130	-0.593966	4.5706	14.6568	0.000215352	0.00651387
AT5G22860	-0.594171	3.86608	10.9384	0.00127521	0.0273126
AT1G02170	-0.594939	5.20321	20.4298	1.57402e-05	0.000732619
AT2G44920	-0.595616	4.0713	11.9621	0.000774838	0.0184539
AT1G12750	-0.596168	3.80122	10.5714	0.00152727	0.0314292
AT1G53170	-0.597725	4.02995	12.0791	0.000732295	0.0177169
AT4G10060	-0.599956	4.83866	16.6878	8.42397e-05	0.00299563
AT1G44446	-0.601351	5.45363	20.6673	1.41805e-05	0.000673071
AT5G22500	-0.601446	8.04654	33.6954	6.39141e-08	5.5117e-06
AT5G18760	-0.601506	3.81339	10.9062	0.00129556	0.0276778
AT3G24430	-0.60231	5.27601	20.6124	1.45261e-05	0.000683075
AT5G53420	-0.602871	4.17519	10.894	0.00130328	0.0278075
AT5G14500	-0.60325	3.99796	11.7515	0.000858001	0.0199675
AT3G21055	-0.603873	6.28036	25.68	1.65147e-06	0.000100905
AT1G69260	-0.606484	5.19927	19.4327	2.44601e-05	0.0010689
AT1G32080	-0.607101	5.49682	21.4335	1.01424e-05	0.000507197
AT1G79040	-0.607769	7.71548	25.4221	1.84038e-06	0.000111234
AT5G10770	-0.608061	9.04633	36.0326	2.57314e-08	2.46355e-06
AT5G13370	-0.609072	4.71546	15.6381	0.000136472	0.00451391
AT1G49450	-0.609287	3.90279	11.5871	0.000929219	0.021228
AT3G17040	-0.609735	4.84291	16.8286	7.89939e-05	0.00285133
AT1G08380	-0.610417	6.96298	28.7262	4.67929e-07	3.35999e-05
AT2G33770	-0.61164	7.23928	32.7781	9.17573e-08	7.67041e-06
AT5G66570	-0.611859	9.01374	29.2509	3.77772e-07	2.80863e-05
AT1G52100	-0.614867	6.93875	28.9465	4.27658e-07	3.10398e-05
AT3G49960	-0.615436	3.85607	9.44999	0.00266654	0.0485422
AT5G01520	-0.615625	5.73491	26.0841	1.39443e-06	8.64574e-05
AT5G62720	-0.615694	6.01071	28.1854	5.8397e-07	3.9968e-05
AT1G23310	-0.616729	7.09275	27.9926	6.32114e-07	4.29135e-05
AT1G30620	-0.617563	4.08672	13.308	0.000406602	0.0110104
AT4G38970	-0.618185	7.9089	31.4445	1.55948e-07	1.23892e-05
AT1G24280	-0.618491	4.42174	15.5723	0.00014069	0.00461707
AT4G09730	-0.620582	3.93237	12.0382	0.000746898	0.0180183
AT2G30460	-0.621583	4.58915	17.2788	6.43567e-05	0.00237399
AT1G58602	-0.622256	3.83486	11.6521	0.000900366	0.020738
AT1G01040	-0.623273	5.27196	21.6766	9.12414e-06	0.000463167
AT4G00180	-0.623406	4.41587	15.0429	0.000179866	0.00560185
AT3G55130	-0.624633	5.1236	17.9778	4.69062e-05	0.00182228
AT1G08640	-0.626516	4.29041	15.3627	0.000155029	0.00497396
AT2G46680	-0.626524	5.90622	26.8975	9.93726e-07	6.38511e-05
AT2G45290	-0.627317	5.97589	28.2549	5.67533e-07	3.90819e-05
AT2G30170	-0.627441	3.68938	10.3008	0.00174561	0.0351219
AT5G17670	-0.629087	3.48865	9.57988	0.00249861	0.0461858
AT5G41870	-0.630935	4.04903	13.605	0.000353193	0.00978489
AT3G23150	-0.631161	5.10129	21.6971	9.04301e-06	0.000459743
AT1G09630	-0.631239	4.16347	14.5787	0.000223366	0.00672698
AT3G26570	-0.631285	5.65066	25.7314	1.61626e-06	9.91141e-05
AT3G26740	-0.631698	5.24154	19.1249	2.80505e-05	0.00119928
AT3G06370	-0.631715	4.20601	14.8974	0.000192475	0.0059395
AT1G75710	-0.632072	4.66811	18.1759	4.2904e-05	0.00170424
AT3G62200	-0.63278	3.59576	10.1094	0.00191922	0.0377759
AT1G09350	-0.632848	4.59053	17.7728	5.14543e-05	0.00197163
AT5G55970	-0.633873	4.95281	20.7588	1.36222e-05	0.000651173
AT5G40850	-0.635441	7.16273	35.3995	3.28701e-08	3.0263e-06
AT3G10405	-0.63556	3.7269	10.5509	0.00154284	0.0317108
AT5G54300	-0.636808	3.91367	12.6747	0.00054998	0.0141085
AT3G54000	-0.637402	3.63798	10.8519	0.00133051	0.0282722
AT1G44000	-0.63883	4.08197	13.9801	0.000295856	0.00839718
AT4G24930	-0.638985	4.0279	12.7121	0.000540201	0.0139214
AT1G48420	-0.640732	5.48493	25.5083	1.77485e-06	0.000107661
AT4G16120	-0.641743	4.53517	17.8181	5.04106e-05	0.00193605
AT1G01630	-0.641881	6.0107	30.3397	2.43026e-07	1.84771e-05
AT4G24960	-0.6425	5.46367	25.859	1.53214e-06	9.4127e-05
AT5G04960	-0.642527	4.62691	17.4708	5.89882e-05	0.00220562
AT5G17700	-0.64317	4.74889	19.294	2.60157e-05	0.00112807
AT5G61640	-0.644268	3.38733	9.43095	0.00269212	0.0488941
AT5G51160	-0.644463	3.4466	10.008	0.00201832	0.0392283
AT5G57530	-0.645986	3.71654	10.7205	0.0014192	0.0297704
AT1G46554	-0.646499	4.1563	15.236	0.000164418	0.00520268
AT2G21910	-0.647535	3.68664	11.6437	0.000904037	0.0208083
AT4G21280	-0.647685	6.97539	32.0224	1.23842e-07	1.01012e-05
AT2G39380	-0.647949	4.00072	13.5854	0.000356473	0.00985822
AT1G68010	-0.648214	5.83647	24.9162	2.27752e-06	0.000134746
AT1G67340	-0.649813	3.94012	13.6331	0.000348514	0.00967919
AT1G71340	-0.651016	4.83367	20.7181	1.38679e-05	0.000660102
AT2G22860	-0.651079	4.45866	17.4487	5.95826e-05	0.00222228
AT5G02170	-0.65122	5.3974	23.45	4.24672e-06	0.000231674
AT4G16190	-0.651822	8.30325	38.8006	8.94137e-09	9.41927e-07
AT4G12470	-0.652791	7.45245	34.59	4.50317e-08	4.01403e-06
AT5G54190	-0.653525	9.59442	40.4084	4.88685e-09	5.38434e-07
AT5G57345	-0.654158	3.41683	9.79666	0.00224225	0.0423365
AT2G17220	-0.654352	4.15379	15.4902	0.000146139	0.00476797
AT2G35780	-0.654603	5.97048	31.1484	1.75569e-07	1.38173e-05
AT1G54780	-0.655044	5.10047	23.1542	4.82043e-06	0.000260435
AT5G66920	-0.657055	7.13936	37.1616	1.66754e-08	1.67778e-06
AT1G64860	-0.658905	4.991	19.2239	2.68412e-05	0.00115938
AT4G09010	-0.659967	5.29441	24.3077	2.94666e-06	0.000168406
AT2G11520	-0.661965	4.59936	19.782	2.09504e-05	0.000938716
AT5G02760	-0.66304	4.91177	21.7956	8.66449e-06	0.000442508
AT4G10340	-0.664447	8.51474	34.9082	3.97801e-08	3.59357e-06
AT1G68590	-0.667823	5.21078	24.7467	2.44653e-06	0.000143483
AT4G04955	-0.670861	5.61826	29.1359	3.95895e-07	2.91756e-05
AT2G24980	-0.672031	5.88187	28.5079	5.11641e-07	3.61972e-05
AT5G22410	-0.672651	3.70112	12.1076	0.000722281	0.0175251
AT4G28080	-0.672782	7.19146	35.7385	2.88263e-08	2.69086e-06
AT4G37640	-0.674418	5.37622	27.6424	7.30186e-07	4.87082e-05
AT1G44575	-0.677534	7.38883	37.9748	1.22286e-08	1.26444e-06
AT3G53510	-0.678193	3.6576	12.6241	0.000563458	0.0143774
AT5G11020	-0.678716	3.72614	13.1744	0.000433269	0.0115486
AT5G44260	-0.678869	5.48348	26.8038	1.03315e-06	6.62579e-05
AT1G77060	-0.681155	3.14658	9.43598	0.00268534	0.0488052
AT3G23450	-0.682213	4.23024	15.2064	0.000166698	0.00525999
AT4G21770	-0.683461	3.34145	10.4595	0.00161393	0.0329702
AT1G52690	-0.683801	7.2627	40.2658	5.15426e-09	5.66043e-07
AT5G17600	-0.686311	3.22647	10.0295	0.0019969	0.0390045
AT2G01180	-0.687408	4.83297	23.086	4.96355e-06	0.00026688
AT4G13390	-0.691015	5.99998	33.208	7.74274e-08	6.57057e-06
AT3G14595	-0.691102	6.02225	35.4911	3.17231e-08	2.93679e-06
AT4G17030	-0.693403	3.60425	12.4097	0.000624521	0.0156503
AT1G69252	-0.69553	6.38989	37.4478	1.49475e-08	1.51756e-06
AT1G79750	-0.699005	8.19171	45.2157	8.36106e-10	1.07242e-07
AT1G21070	-0.699559	4.66667	21.8984	8.28633e-06	0.000424485
AT2G38980	-0.701265	4.00552	14.5592	0.000225411	0.00677543
AT2G46830	-0.702777	6.08224	35.8881	2.72075e-08	2.57552e-06
AT1G01610	-0.703831	6.34	39.5263	6.80129e-09	7.30215e-07
AT4G05120	-0.70685	4.24532	18.5408	3.64178e-05	0.00149064
AT1G32060	-0.707471	8.21794	35.7888	2.82712e-08	2.64639e-06
AT5G64040	-0.707625	5.66384	30.7894	2.02775e-07	1.57373e-05
AT2G33580	-0.710229	3.34571	11.2561	0.0010917	0.0241678
AT5G11110	-0.711041	5.96111	35.3822	3.30904e-08	3.03826e-06
AT1G31910	-0.711378	6.98967	42.4362	2.30361e-09	2.68795e-07
AT2G26740	-0.712873	4.20859	15.3615	0.000155117	0.00497396
AT3G27925	-0.713841	4.26083	18.3129	4.03409e-05	0.00161966
AT1G44790	-0.71406	3.60661	12.9159	0.00049006	0.012796
AT3G63240	-0.714844	3.74994	14.6428	0.00021677	0.00655085
AT3G52100	-0.715463	3.8115	15.0061	0.000182966	0.00567736
AT5G17230	-0.715742	5.71181	31.5266	1.50909e-07	1.20173e-05
AT3G54590	-0.716429	7.41702	41.3322	3.46453e-09	3.91893e-07
AT4G36180	-0.717366	4.63231	23.5279	4.10768e-06	0.000225185
AT5G62280	-0.718365	5.87543	31.948	1.27564e-07	1.03048e-05
AT1G74960	-0.718535	5.48785	32.4288	1.05372e-07	8.74331e-06
AT5G47740	-0.718966	3.12295	9.79942	0.00223916	0.0423365
AT5G11260	-0.718991	4.27554	19.0275	2.92962e-05	0.00124301
AT5G01530	-0.721282	8.35311	41.7381	2.98069e-09	3.39546e-07
AT2G24270	-0.721423	7.74403	33.5504	6.76627e-08	5.78577e-06
AT5G35790	-0.722686	4.78894	23.5852	4.00826e-06	0.000220454
AT2G03070	-0.723	4.26342	19.6869	2.18513e-05	0.000971313
AT4G38280	-0.724353	3.6391	14.1905	0.000267957	0.00776268
AT5G38940	-0.724455	3.36226	11.742	0.000861957	0.0200457
AT4G00290	-0.725386	3.34827	11.9681	0.000772605	0.0184396
AT5G52310	-0.725845	8.31126	48.213	2.8641e-10	4.09567e-08
AT5G56380	-0.72944	3.37426	11.7291	0.000867371	0.0201437
AT2G39730	-0.730589	8.50982	44.1552	1.228e-09	1.53981e-07
AT5G57170	-0.731725	3.86847	16.2988	0.000100669	0.00346618
AT1G67360	-0.732023	5.39551	31.8449	1.32913e-07	1.07111e-05
AT5G13630	-0.732366	7.6694	42.1667	2.54422e-09	2.93809e-07
AT5G25610	-0.736231	8.78594	53.0953	5.23417e-11	8.83891e-09
AT2G39470	-0.738267	3.94915	17.0428	7.16475e-05	0.00261424
AT1G05910	-0.738286	4.27606	20.8622	1.30188e-05	0.000627688
AT1G80020	-0.739836	4.78065	26.631	1.11008e-06	6.9989e-05
AT3G32940	-0.740692	4.86638	27.0899	9.17539e-07	5.9296e-05
AT3G62220	-0.741973	3.566	14.1278	0.000275972	0.00791976
AT3G15030	-0.742124	4.06638	18.3566	3.95553e-05	0.00159383
AT2G42220	-0.743967	5.369	28.5249	5.08076e-07	3.6102e-05
AT4G18370	-0.744151	4.03722	17.7999	5.08288e-05	0.00194989
AT1G67740	-0.744889	6.4569	39.7995	6.13805e-09	6.69705e-07
AT1G20340	-0.745236	7.72833	44.3314	1.15181e-09	1.45513e-07
AT2G37870	-0.746593	4.96422	28.9489	4.27249e-07	3.10398e-05
AT1G18650	-0.747793	4.36209	20.7879	1.34495e-05	0.000645674
AT2G41190	-0.747886	5.88258	39.5314	6.78828e-09	7.30215e-07
AT5G45460	-0.748588	3.45812	12.6867	0.000546812	0.0140379
AT5G01920	-0.749587	5.18823	30.1409	2.63336e-07	1.98863e-05
AT4G30920	-0.75045	5.56651	36.2107	2.40236e-08	2.31321e-06
AT5G23220	-0.751031	6.98907	46.7595	4.80211e-10	6.48092e-08
AT5G47530	-0.754987	3.99718	18.5223	3.6721e-05	0.00150123
AT5G38520	-0.755534	4.37152	21.0116	1.21943e-05	0.000594544
AT1G37130	-0.755635	8.14926	52.9708	5.4623e-11	9.17803e-09
AT2G26930	-0.757665	3.41855	13.1864	0.000430797	0.0114988
AT4G28660	-0.757671	4.21659	20.012	1.89234e-05	0.000857037
AT5G41040	-0.757843	6.63447	47.1092	4.23873e-10	5.83781e-08
AT1G61560	-0.758392	3.5793	14.4114	0.000241568	0.00715233
AT1G07150	-0.759413	3.11653	11.3622	0.00103669	0.0231634
AT1G62440	-0.759435	5.98666	41.0113	3.90324e-09	4.37228e-07
AT5G28500	-0.760438	4.82639	28.3528	5.45195e-07	3.78992e-05
AT5G06290	-0.762483	5.57845	37.3919	1.52701e-08	1.54564e-06
AT5G40610	-0.763197	3.25274	12.4445	0.000614168	0.0154484
AT1G67090	-0.763344	11.2536	58.5892	8.23429e-12	1.6088e-09
AT1G01390	-0.763582	3.33858	12.9469	0.000482884	0.0126381
AT4G23890	-0.764072	4.49265	22.783	5.6538e-06	0.00030206
AT4G39955	-0.765092	3.66549	14.4609	0.000236029	0.00701925
AT5G27360	-0.765802	3.19005	11.8888	0.000802814	0.0189279
AT1G75240	-0.767084	5.29382	30.0838	2.69486e-07	2.02596e-05
AT2G05620	-0.768523	4.59181	24.6695	2.52779e-06	0.000147733
AT3G61700	-0.768843	5.38495	33.6783	6.43457e-08	5.53027e-06
AT5G13200	-0.770653	3.35505	13.4446	0.000381075	0.0104114
AT3G59780	-0.771732	5.19402	33.1082	8.05381e-08	6.80021e-06
AT4G14510	-0.774055	3.61068	15.7216	0.00013131	0.00436465
AT4G02520	-0.775594	7.94159	54.9306	2.80149e-11	4.929e-09
AT5G56890	-0.776375	5.51258	38.021	1.20155e-08	1.24623e-06
AT3G22150	-0.778915	3.6388	16.2461	0.000103134	0.00353657
AT1G76450	-0.779789	4.52709	25.4937	1.78582e-06	0.000108131
AT1G20020	-0.782109	5.67333	39.5379	6.77163e-09	7.30215e-07
AT1G68725	-0.782296	4.34316	24.0407	3.30081e-06	0.000186798
AT1G75690	-0.782721	3.84256	17.4702	5.90046e-05	0.00220562
AT3G08020	-0.783384	3.78743	17.6727	5.38366e-05	0.0020515
AT4G33010	-0.785752	7.34646	50.7838	1.1624e-10	1.78367e-08
AT5G46330	-0.7885	4.06867	19.3343	2.5554e-05	0.00111236
AT2G23760	-0.78907	3.75068	17.2134	6.62968e-05	0.00244288
AT1G23720	-0.789912	7.59769	46.9549	4.47849e-10	6.06853e-08
AT5G57960	-0.789921	4.08407	20.1516	1.7793e-05	0.00081021
AT3G08860	-0.791801	5.14868	34.1509	5.34599e-08	4.72768e-06
AT2G20570	-0.792651	3.77899	18.3688	3.93392e-05	0.00158884
AT3G20680	-0.793456	3.45216	14.889	0.000193232	0.00595739
AT3G47070	-0.793517	3.50368	13.9318	0.000302666	0.00856875
AT1G02205	-0.794348	7.97844	57.7106	1.1021e-11	2.12851e-09
AT2G31083	-0.794729	3.82032	17.6724	5.38438e-05	0.0020515
AT1G49750	-0.795071	3.33964	13.9982	0.000293339	0.0083398
AT1G21310	-0.796056	10.4935	64.7141	1.12695e-12	2.49152e-10
AT2G20260	-0.796148	5.97877	40.4215	4.863e-09	5.3757e-07
AT4G29930	-0.798868	4.50993	26.953	9.71119e-07	6.25181e-05
AT1G04220	-0.80026	7.24166	55.8784	2.0345e-11	3.71573e-09
AT1G12860	-0.801796	3.5845	16.7211	8.29698e-05	0.00296302
AT1G16930	-0.802757	4.00573	21.0969	1.1748e-05	0.000574659
AT4G13210	-0.803012	2.64702	9.4416	0.00267778	0.0486942
AT2G37450	-0.803069	3.25977	12.9251	0.000487917	0.0127499
AT2G06520	-0.803184	7.07003	51.7709	8.25549e-11	1.3274e-08
AT5G54270	-0.804997	7.99602	51.1786	1.01343e-10	1.59889e-08
AT2G01590	-0.805297	3.03387	11.5037	0.000967657	0.0219273
AT1G52230	-0.805348	6.48404	51.5512	8.9071e-11	1.4119e-08
AT1G76380	-0.806105	3.95907	20.9499	1.25282e-05	0.000607516
AT4G12800	-0.807605	8.07691	51.877	7.95844e-11	1.28579e-08
AT2G14910	-0.808128	6.30533	50.9184	1.10925e-10	1.72576e-08
AT3G01650	-0.811361	5.12514	36.1678	2.44242e-08	2.34508e-06
AT5G09660	-0.812246	6.19951	42.6842	2.10276e-09	2.46214e-07
AT5G47110	-0.813759	8.03113	50.6058	1.23667e-10	1.88047e-08
AT2G03200	-0.81481	3.40023	15.0863	0.000176269	0.00550513
AT1G44820	-0.815584	5.22881	38.2937	1.08333e-08	1.1271e-06
AT3G55340	-0.817397	2.58068	9.49019	0.00261335	0.0478593
AT3G22600	-0.819498	8.0228	60.7517	4.04566e-12	8.34513e-10
AT3G20300	-0.819742	3.24605	14.0374	0.000287969	0.00822191
AT2G38390	-0.822021	3.74686	18.2008	4.24251e-05	0.0016876
AT3G18890	-0.822997	4.61524	28.644	4.83917e-07	3.45266e-05
AT4G15430	-0.823203	3.31491	14.8494	0.000196835	0.00602426
AT1G08430	-0.825417	3.09011	13.3022	0.00040772	0.011014
AT5G08050	-0.82695	4.20476	24.9331	2.26132e-06	0.000134261
AT1G67910	-0.829805	6.25873	50.0172	1.51859e-10	2.27823e-08
AT1G52827	-0.833254	3.5377	17.5202	5.7684e-05	0.00217025
AT5G23120	-0.835288	5.53114	42.3881	2.34478e-09	2.72651e-07
AT1G61520	-0.836428	7.80343	53.1668	5.10756e-11	8.66866e-09
AT1G67840	-0.83874	3.90763	21.4462	1.00867e-05	0.000505917
AT1G16300	-0.839094	3.57733	18.2967	4.06354e-05	0.00162954
AT5G02120	-0.842232	2.99341	12.6455	0.000557714	0.0142851
AT2G18050	-0.843531	4.40701	27.1496	8.95125e-07	5.7985e-05
AT3G47860	-0.843944	3.43743	16.825	7.91244e-05	0.00285298
AT1G51830	-0.84547	4.75961	33.2561	7.59728e-08	6.46346e-06
AT2G02400	-0.846686	3.16844	14.2671	0.000258486	0.00758639
AT2G43800	-0.846859	3.17971	14.6726	0.000213766	0.00647755
AT3G12915	-0.847643	3.55822	16.3047	0.000100394	0.00346618
AT3G50970	-0.850884	6.20647	50.3206	1.36593e-10	2.05839e-08
AT1G12040	-0.85357	5.05902	37.3553	1.54853e-08	1.56272e-06
AT1G50250	-0.853826	4.8821	34.0883	5.47866e-08	4.83229e-06
AT3G02380	-0.857006	3.56985	18.3898	3.89705e-05	0.00158356
AT3G57320	-0.857205	3.45249	17.3327	6.28009e-05	0.00232425
AT5G14840	-0.857643	6.09637	47.0331	4.35523e-10	5.9254e-08
AT1G12900	-0.858733	6.36417	52.588	6.22934e-11	1.03122e-08
AT4G11610	-0.859929	6.51335	56.571	1.61231e-11	2.99347e-09
AT3G15520	-0.863387	3.62514	19.4504	2.42689e-05	0.00106192
AT1G31330	-0.863631	7.83566	64.2387	1.3116e-12	2.88082e-10
AT3G20090	-0.863661	3.85329	22.4659	6.48185e-06	0.000339817
AT2G29060	-0.864175	3.77478	21.8059	8.62559e-06	0.000441192
AT4G02770	-0.864321	7.46866	56.5072	1.64715e-11	3.04135e-09
AT1G32900	-0.864937	3.38803	14.0326	0.00028862	0.00822652
AT5G58260	-0.865677	3.29656	15.6684	0.000134578	0.00446005
AT3G02730	-0.865927	3.41618	17.2977	6.38082e-05	0.00235634
AT4G29800	-0.865991	3.53771	18.898	3.10391e-05	0.0013022
AT1G10960	-0.866233	6.81079	54.6799	3.04984e-11	5.31036e-09
AT5G22890	-0.867065	4.4908	31.7652	1.37201e-07	1.10039e-05
AT5G17170	-0.867466	3.5954	18.8803	3.12851e-05	0.00130763
AT1G10040	-0.867749	2.66388	11.075	0.00119273	0.0259094
AT1G08540	-0.867749	4.89913	37.8975	1.25933e-08	1.29815e-06
AT3G22620	-0.869121	7.77838	65.9856	7.52607e-13	1.68609e-10
AT3G61080	-0.870254	3.10565	12.9902	0.000473012	0.0124476
AT4G32320	-0.87142	3.28504	15.3108	0.000158813	0.0050491
AT5G46390	-0.873433	2.74122	11.9424	0.000782265	0.0186044
AT1G08250	-0.874578	4.19555	27.9948	6.31535e-07	4.29135e-05
AT4G30950	-0.880585	7.10912	60.647	4.18639e-12	8.52627e-10
AT1G16750	-0.880917	3.04626	14.5669	0.000224603	0.00675719
AT2G15970	-0.881399	9.02522	75.0832	4.56174e-14	1.27748e-11
AT4G00895	-0.882365	4.4529	32.377	1.07561e-07	8.90291e-06
AT2G16880	-0.882578	3.40148	18.0687	4.50248e-05	0.00177223
AT5G26150	-0.88302	2.4663	9.90577	0.00212363	0.0408498
AT5G65860	-0.884869	2.52149	10.5734	0.00152579	0.031418
AT3G18010	-0.88537	2.98179	12.763	0.000527212	0.01366
AT5G50780	-0.886491	3.29968	17.1927	6.69232e-05	0.00246056
AT1G03600	-0.887191	5.35015	43.0365	1.84768e-09	2.20182e-07
AT4G27700	-0.888809	3.85333	21.6182	9.35878e-06	0.000472935
AT1G56600	-0.888981	3.97493	23.8809	3.53309e-06	0.000197883
AT3G16140	-0.891551	5.97821	52.853	5.68758e-11	9.46193e-09
ATCG00020	-0.89176	3.20761	10.4114	0.00165273	0.0335996
AT1G49975	-0.893498	3.28556	16.5613	8.92574e-05	0.003131
AT3G10450	-0.895106	3.53172	19.0219	2.93692e-05	0.00124301
AT5G13770	-0.89514	3.57971	19.8088	2.07034e-05	0.000928888
AT1G42970	-0.895591	7.20445	60.7501	4.04778e-12	8.34513e-10
AT5G07180	-0.895867	2.94387	13.4906	0.00037286	0.0102208
AT5G58760	-0.896038	2.71428	11.8009	0.000837711	0.0195903
AT4G12970	-0.89721	2.78854	12.1727	0.000699945	0.017073
AT1G21500	-0.89798	3.40353	18.2626	4.12632e-05	0.00164881
AT4G15620	-0.898792	2.98274	14.5993	0.000221223	0.00667343
AT1G66940	-0.899835	2.98499	14.2248	0.000263681	0.00770521
AT4G07825	-0.900047	6.48737	66.1098	7.23602e-13	1.63199e-10
AT3G63520	-0.900784	6.96749	66.1914	7.05198e-13	1.60123e-10
AT4G13710	-0.900878	2.72232	12.3962	0.000628573	0.0157167
AT1G15820	-0.902266	7.86631	62.9173	2.0043e-12	4.2901e-10
AT2G14210	-0.902667	2.55717	10.3075	0.00173982	0.035031
AT2G04360	-0.9035	3.8589	24.3177	2.93416e-06	0.000167977
AT5G16010	-0.909853	3.81728	23.7417	3.7492e-06	0.000207907
AT3G26165	-0.911039	2.32288	9.71844	0.00233147	0.0437948
AT3G20080	-0.911072	4.57116	35.552	3.09836e-08	2.87625e-06
AT3G47295	-0.911217	3.58951	20.8995	1.28074e-05	0.000619272
AT2G34420	-0.912063	8.10168	57.6	1.1434e-11	2.17084e-09
AT2G43150	-0.912746	10.7395	91.1836	4.45476e-16	1.74073e-13
AT3G54050	-0.91302	5.86466	46.6611	4.974e-10	6.65942e-08
AT5G19220	-0.913501	3.83718	24.1437	3.15929e-06	0.000179641
AT2G29130	-0.913853	3.01201	15.1593	0.000170382	0.00535111
AT3G27997	-0.917845	2.67601	12.1248	0.000716307	0.0174179
AT1G25510	-0.91794	2.36649	10.3291	0.00172139	0.0347074
AT4G35220	-0.92017	4.94908	43.6798	1.46023e-09	1.7844e-07
AT1G30380	-0.923014	6.3795	57.8608	1.0484e-11	2.0365e-09
AT3G61320	-0.923373	2.30868	10.0656	0.00196146	0.0384793
AT3G14440	-0.925439	5.00225	44.0982	1.25374e-09	1.56624e-07
AT1G74470	-0.929736	9.03586	63.3837	1.72503e-12	3.716e-10
AT1G52330	-0.930185	2.2895	10.0499	0.00197677	0.0386892
AT1G15180	-0.930666	4.87875	41.3239	3.4752e-09	3.91893e-07
AT1G80830	-0.940338	6.46804	69.554	2.46282e-13	5.99731e-11
AT4G26520	-0.942139	3.17321	17.8202	5.03631e-05	0.00193605
AT3G49690	-0.946007	2.66493	12.8854	0.000497258	0.0129538
AT1G03130	-0.948196	6.0157	54.8796	2.85029e-11	4.98874e-09
AT3G19430	-0.94982	3.23499	16.5025	9.16932e-05	0.0032064
AT3G09600	-0.951416	4.38284	36.2877	2.33216e-08	2.25856e-06
AT1G54180	-0.951453	2.48487	11.8639	0.00081255	0.0191083
AT3G27250	-0.95342	5.35111	52.9327	5.5341e-11	9.25242e-09
AT1G51840	-0.959022	2.27022	9.74744	0.00229797	0.043214
AT3G47780	-0.959811	2.87195	15.4422	0.000149421	0.00484242
AT5G48220	-0.960669	3.62603	23.9495	3.43137e-06	0.000193151
AT2G42850	-0.961104	2.65388	13.3189	0.000404497	0.0109622
AT1G55610	-0.96251	2.47735	12.2085	0.000688003	0.0168762
AT3G57540	-0.962831	3.91836	28.4902	5.15352e-07	3.63832e-05
AT5G28520	-0.964064	2.48657	11.9701	0.000771863	0.0184353
AT5G05460	-0.96584	4.87385	45.9002	6.53386e-10	8.54359e-08
AT5G53970	-0.968541	3.246	19.2971	2.59808e-05	0.00112802
AT5G51260	-0.969108	2.75651	14.6847	0.000212558	0.00645258
AT3G50820	-0.973733	6.08993	66.2833	6.85012e-13	1.56597e-10
AT3G08940	-0.974846	8.11594	71.6015	1.31088e-13	3.31219e-11
AT1G01780	-0.975777	5.64082	55.2912	2.47991e-11	4.43284e-09
AT5G66850	-0.975961	5.10274	52.0861	7.40431e-11	1.20787e-08
AT3G02790	-0.976176	3.44241	22.4871	6.4228e-06	0.000337247
AT5G59530	-0.976615	4.22466	34.9883	3.85604e-08	3.50222e-06
AT5G10370	-0.980719	3.04261	18.0342	4.57303e-05	0.00178902
AT1G14345	-0.987134	3.01063	17.6609	5.41239e-05	0.00205518
AT5G24080	-0.989574	2.18182	10.5359	0.00155428	0.0318875
AT1G26230	-0.98982	3.08177	17.8402	4.9912e-05	0.0019235
AT5G50400	-0.990039	4.81139	47.7291	3.39992e-10	4.80061e-08
AT3G44670	-0.990414	4.36413	39.089	8.01876e-09	8.52755e-07
AT1G17345	-0.991261	2.31119	11.371	0.00103227	0.0230955
AT2G22510	-0.993883	3.96783	28.3517	5.45452e-07	3.78992e-05
AT2G41340	-0.99424	2.86089	15.2286	0.000164983	0.00521567
AT1G08700	-0.994344	4.57219	43.5004	1.55911e-09	1.89148e-07
AT5G05270	-0.994395	2.29321	11.1434	0.00115348	0.0252689
AT3G01060	-0.997866	2.30609	11.4245	0.00100568	0.0225909
AT4G16480	-1.00065	2.55849	13.6903	0.000339225	0.00947358
AT3G56450	-1.00205	2.23938	11.1645	0.00114169	0.0250761
AT5G04490	-1.00432	3.41226	22.7143	5.82369e-06	0.000309171
AT3G56275	-1.00607	3.0475	18.9835	2.98767e-05	0.00125973
AT3G20960	-1.00714	4.17342	35.1459	3.62692e-08	3.31203e-06
AT5G10230	-1.009	2.61141	14.0567	0.000285369	0.00815461
AT5G20830	-1.01149	3.68983	28.0695	6.12444e-07	4.17468e-05
AT3G56940	-1.01271	7.82532	81.1878	7.524e-15	2.29858e-12
AT1G70760	-1.01379	2.64746	14.9116	0.000191202	0.00591109
AT5G37300	-1.01385	3.50886	25.0434	2.15848e-06	0.000128838
AT5G48070	-1.01447	2.12673	10.7105	0.00142623	0.0298621
AT1G33260	-1.01472	2.1767	10.7563	0.00139446	0.0294167
AT1G55670	-1.01567	7.45493	83.0438	4.40129e-15	1.39533e-12
AT4G15080	-1.01664	5.16964	57.6718	1.11642e-11	2.14384e-09
AT5G24120	-1.01696	2.04636	10.1622	0.00186967	0.0370412
AT1G08280	-1.01733	2.89425	17.509	5.79768e-05	0.00217445
AT1G66820	-1.01803	2.10559	10.3778	0.00168038	0.0340585
AT3G09490	-1.02162	3.41888	24.0399	3.30183e-06	0.000186798
AT4G38080	-1.0292	5.09229	55.1831	2.57213e-11	4.54928e-09
AT3G48080	-1.03186	2.61166	14.8816	0.000193897	0.00596693
AT4G05180	-1.03376	6.48525	74.7212	5.0859e-14	1.38953e-11
AT1G02260	-1.03387	4.19917	38.4425	1.0239e-08	1.07526e-06
AT1G50900	-1.03413	2.81921	16.7689	8.11787e-05	0.00291184
AT5G24380	-1.03605	4.06463	36.3785	2.25199e-08	2.19357e-06
AT2G39980	-1.0366	5.73865	68.6116	3.30041e-13	7.97916e-11
AT4G39710	-1.03697	3.6721	28.9381	4.29125e-07	3.10792e-05
AT3G16520	-1.03892	4.99106	51.7476	8.32209e-11	1.33173e-08
AT4G37340	-1.03961	2.18229	11.2831	0.00107746	0.0239032
AT5G54230	-1.04198	4.53946	44.9621	9.16361e-10	1.16645e-07
AT2G35340	-1.04812	2.36249	13.0654	0.000456348	0.0120943
AT3G61470	-1.04891	8.2237	78.0589	1.88076e-14	5.40197e-12
AT1G13950	-1.05822	4.02827	36.9338	1.8195e-08	1.81977e-06
AT1G13820	-1.05907	3.03563	20.4472	1.56207e-05	0.000728063
AT2G29010	-1.05969	2.07924	11.0751	0.00119268	0.0259094
AT3G17680	-1.06488	3.01232	18.8089	3.22999e-05	0.0013417
AT1G02060	-1.06741	2.0152	10.6555	0.00146533	0.0305095
AT4G00380	-1.06759	2.18377	12.297	0.000659308	0.0163093
AT1G68850	-1.07026	2.26805	12.7255	0.000536764	0.01385
AT5G56910	-1.07383	3.00708	20.9427	1.25674e-05	0.000608542
AT4G28750	-1.07694	6.66814	84.1095	3.24276e-15	1.05799e-12
AT4G10120	-1.0777	3.27103	24.0434	3.29697e-06	0.000186798
AT5G59320	-1.08242	3.81419	28.9845	4.21083e-07	3.06952e-05
AT5G13910	-1.08797	3.1833	22.6477	5.99305e-06	0.000316164
AT2G46870	-1.09362	2.6241	16.2231	0.00010423	0.00357049
AT2G41850	-1.09507	3.36986	25.5988	1.70869e-06	0.000104023
AT2G04050	-1.1028	2.89518	18.4877	3.72961e-05	0.00152289
AT4G24480	-1.10575	5.77469	82.0762	5.81686e-15	1.82688e-12
AT4G01020	-1.10617	2.87841	19.6351	2.23589e-05	0.000989949
AT4G02460	-1.10808	1.80253	9.81586	0.00222089	0.0421417
AT1G78915	-1.11373	2.87763	20.3026	1.66472e-05	0.000763207
AT4G31610	-1.11435	1.99295	11.4941	0.000972224	0.0219863
AT3G05770	-1.11489	2.96426	21.3429	1.05511e-05	0.000524511
AT3G27580	-1.11684	4.64205	55.2538	2.51145e-11	4.46547e-09
AT3G28550	-1.1179	8.4805	105.11	1.09369e-17	5.32657e-15
AT4G01010	-1.11857	1.69994	9.40942	0.00272134	0.0492995
AT2G13800	-1.12145	2.42782	15.5153	0.000144453	0.00472671
AT1G68520	-1.12619	4.46354	48.4022	2.67879e-10	3.84704e-08
AT3G09050	-1.12746	2.52578	16.7379	8.2334e-05	0.00294658
AT5G10600	-1.1277	2.56405	17.4912	5.84466e-05	0.00218963
AT1G43160	-1.12913	3.93272	39.1572	7.81517e-09	8.33742e-07
AT1G48540	-1.13066	4.7689	60.5592	4.30814e-12	8.66916e-10
AT5G07475	-1.13214	2.28485	13.8289	0.000317715	0.00891221
AT5G46710	-1.13345	2.97075	22.7408	5.75762e-06	0.000307119
AT2G21330	-1.13463	5.99665	79.4374	1.25371e-14	3.7284e-12
AT1G56320	-1.13504	2.15783	12.9552	0.000480964	0.0126272
AT5G05310	-1.13512	3.9066	39.6755	6.43043e-09	6.9708e-07
AT5G52300	-1.1363	7.32067	102.781	1.99807e-17	9.59215e-15
AT2G04230	-1.13953	3.35633	28.8291	4.48666e-07	3.24246e-05
AT5G38430	-1.13974	5.50247	72.0548	1.14121e-13	2.95002e-11
AT5G39850	-1.13987	1.71236	9.83234	0.00220272	0.041868
AT5G49080	-1.14646	4.39622	47.0428	4.34033e-10	5.9254e-08
AT4G30420	-1.14656	3.17059	24.6364	2.56349e-06	0.000149559
AT1G57980	-1.1488	1.68688	9.71109	0.00234003	0.0439312
AT3G43210	-1.14914	3.26577	27.8898	6.5941e-07	4.45271e-05
AT1G78290	-1.14963	3.49211	31.6968	1.40998e-07	1.12815e-05
AT3G17609	-1.14986	2.0347	12.33	0.00064891	0.016165
AT2G14960	-1.15283	2.55623	18.242	4.1646e-05	0.00166213
AT1G74460	-1.1581	2.85502	21.7885	8.69105e-06	0.000443191
AT4G21650	-1.15855	2.54264	18.1585	4.32409e-05	0.00171357
AT1G50520	-1.1634	3.66256	36.2327	2.38205e-08	2.30025e-06
AT4G10510	-1.16365	2.85825	22.0563	7.7378e-06	0.000398817
AT3G18390	-1.1667	5.46681	81.4624	6.94771e-15	2.16183e-12
AT5G59310	-1.17221	1.87663	11.0906	0.00118365	0.0257454
AT3G46500	-1.17318	2.56886	18.9092	3.08846e-05	0.00129735
AT1G19530	-1.17762	5.96637	96.4103	1.0755e-16	4.69378e-14
AT4G39970	-1.17879	3.99699	41.7745	2.94084e-09	3.36146e-07
AT2G21280	-1.17997	3.28334	27.829	6.76128e-07	4.55336e-05
AT3G07195	-1.18578	2.08445	13.174	0.000433352	0.0115486
AT5G35190	-1.19001	5.6882	77.7862	2.03862e-14	5.80574e-12
AT5G12420	-1.1916	3.38731	28.3499	5.45848e-07	3.78992e-05
AT5G41850	-1.19212	1.75093	10.7474	0.00140061	0.0294959
AT3G59440	-1.19471	1.75506	10.6376	0.00147829	0.0307032
AT1G14150	-1.19794	2.31851	16.4377	9.4456e-05	0.00329615
AT2G34090	-1.20105	2.43461	18.2291	4.18895e-05	0.00166986
AT1G10340	-1.20257	1.84797	11.6638	0.000895276	0.0206491
AT4G23250	-1.20306	3.13421	26.9798	9.60366e-07	6.19445e-05
AT1G31310	-1.20335	1.82356	11.5642	0.000939621	0.0214074
AT2G15030	-1.20436	2.78293	22.3663	6.76656e-06	0.000351453
AT4G14790	-1.20755	2.2673	16.333	9.90994e-05	0.00342617
AT2G13360	-1.21069	6.52139	109.688	3.41118e-18	1.84892e-15
AT3G21390	-1.21405	2.96018	25.6804	1.6512e-06	0.000100905
AT5G57540	-1.21896	2.85979	23.7903	3.67222e-06	0.000204652
AT2G48130	-1.22623	6.29032	111.887	1.96644e-18	1.08331e-15
AT1G77760	-1.22687	7.34039	127.548	4.53473e-20	3.31281e-17
AT1G62500	-1.22764	1.60366	10.0403	0.00198623	0.0388291
AT3G29410	-1.22787	3.28064	31.9868	1.25607e-07	1.01711e-05
AT1G04800	-1.22892	3.90404	42.9455	1.91042e-09	2.25262e-07
AT1G10060	-1.23022	2.05701	14.3715	0.000246134	0.0072683
AT4G01540	-1.23755	1.65952	10.9921	0.00124212	0.0266378
AT3G09160	-1.24008	3.22211	29.1711	3.90251e-07	2.88863e-05
AT4G08410	-1.2422	4.2965	53.6334	4.35434e-11	7.4657e-09
AT3G19150	-1.24224	2.54766	20.7652	1.3584e-05	0.000650273
AT1G75460	-1.24349	2.44145	19.2301	2.67668e-05	0.00115766
AT3G18950	-1.24457	1.45856	9.39509	0.00274098	0.0495078
AT3G01210	-1.2461	2.69215	22.3842	6.71469e-06	0.000349299
AT5G56160	-1.24954	1.59417	10.5374	0.00155314	0.0318835
AT4G07820	-1.25034	5.16223	83.357	4.02273e-15	1.28746e-12
AT5G46450	-1.25357	1.63327	11.0541	0.00120498	0.0260913
AT2G29290	-1.25651	2.59755	21.7243	8.93677e-06	0.00045503
AT1G29920	-1.26417	5.06525	60.1828	4.87277e-12	9.68931e-10
AT2G37670	-1.26626	3.3817	35.1309	3.64812e-08	3.32236e-06
AT1G80130	-1.26846	2.68367	17.0458	7.15485e-05	0.00261347
AT4G21860	-1.27267	5.42628	94.5022	1.79911e-16	7.65307e-14
AT2G28100	-1.27291	4.27384	59.054	7.06231e-12	1.38789e-09
AT1G77630	-1.27609	2.05933	15.53	0.000143468	0.00469915
AT2G31085	-1.28106	2.07015	16.0294	0.000113933	0.00386351
AT5G03970	-1.28969	2.45399	20.7214	1.38476e-05	0.000660068
AT4G24130	-1.29134	4.29945	60.8612	3.90361e-12	8.14787e-10
AT2G26070	-1.29148	3.23143	34.0604	5.53886e-08	4.85988e-06
AT3G60520	-1.29533	2.89666	26.672	1.09134e-06	6.90669e-05
AT3G16770	-1.29712	6.63597	124.346	9.59806e-20	6.20275e-17
AT5G19890	-1.29877	4.68721	70.7881	1.68259e-13	4.21966e-11
AT3G27500	-1.30005	1.44481	10.3287	0.00172169	0.0347074
AT1G18100	-1.30008	4.61822	73.5816	7.17371e-14	1.91327e-11
AT5G14740	-1.30734	9.88568	117.89	4.49403e-19	2.64951e-16
AT1G32440	-1.3109	3.58485	43.3024	1.6762e-09	2.01895e-07
AT4G08400	-1.31318	3.7269	46.1448	5.98449e-10	7.94897e-08
AT1G35290	-1.31724	1.82518	13.8851	0.000309402	0.00870809
AT5G03545	-1.32173	4.20263	61.1565	3.54532e-12	7.44629e-10
AT5G09290	-1.32652	2.39767	21.1846	1.13059e-05	0.000556272
AT3G26650	-1.32911	8.01758	125.78	6.85122e-20	4.51442e-17
AT3G30214	-1.33136	1.50661	11.3088	0.00106403	0.0236799
AT5G54770	-1.33141	4.12895	52.2673	6.95613e-11	1.1403e-08
AT1G06520	-1.3327	1.55033	11.7058	0.000877229	0.0203245
AT3G20280	-1.33414	2.19662	18.7125	3.37225e-05	0.00139219
AT3G14420	-1.34149	6.30983	105.777	9.21627e-18	4.5546e-15
AT5G19170	-1.34402	1.5639	11.9667	0.00077314	0.0184396
AT4G36610	-1.34776	4.07391	55.4448	2.35456e-11	4.25403e-09
AT1G29930	-1.35136	10.5786	145.424	8.26068e-22	7.71112e-19
AT2G34430	-1.35142	2.97393	21.6387	9.27565e-06	0.000470148
AT5G23580	-1.35271	3.40283	40.9573	3.98236e-09	4.44608e-07
AT4G23560	-1.35283	3.75496	45.0075	9.01455e-10	1.15184e-07
AT5G58370	-1.35405	2.56575	24.4094	2.82221e-06	0.000161844
AT1G02800	-1.3623	4.77161	80.8278	8.35371e-15	2.52907e-12
AT1G05970	-1.36299	1.89654	15.4139	0.000151394	0.00488639
AT1G14730	-1.36369	4.53343	76.7367	2.78307e-14	7.85924e-12
AT1G50732	-1.36859	1.32892	10.1435	0.00188709	0.037254
AT2G33500	-1.37034	2.72158	27.4823	7.80061e-07	5.16023e-05
AT3G19000	-1.37604	2.723	28.2711	5.63777e-07	3.8903e-05
AT2G43570	-1.37779	3.34918	39.6986	6.37509e-09	6.93317e-07
AT3G46780	-1.38382	6.14098	114.427	1.04781e-18	6.071e-16
AT4G35190	-1.38422	3.64523	48.7946	2.33244e-10	3.4378e-08
AT5G48490	-1.38734	2.27609	21.023	1.21335e-05	0.000592655
AT5G36260	-1.38918	2.22566	20.6223	1.44634e-05	0.000681687
AT3G10120	-1.39195	1.63394	13.5194	0.0003678	0.0101477
AT5G42310	-1.39479	3.21364	34.0671	5.52439e-08	4.85988e-06
AT2G28720	-1.39555	2.77173	29.0841	4.04326e-07	2.97317e-05
AT5G36930	-1.39687	1.8745	16.2934	0.000100915	0.00347109
AT5G49215	-1.40251	1.8759	16.0797	0.000111329	0.00378667
AT1G54540	-1.40296	1.95458	17.4597	5.92848e-05	0.00221363
AT5G01190	-1.40449	2.18932	19.9686	1.92906e-05	0.00087132
AT5G40800	-1.40544	1.80217	15.4433	0.000149346	0.00484242
AT1G60360	-1.40862	1.18765	9.52744	0.00256506	0.0471548
AT1G72290	-1.41201	2.34411	22.1476	7.43794e-06	0.000383951
AT3G09162	-1.43347	1.20619	10.0033	0.00202307	0.0392978
AT5G33395	-1.43431	1.66142	14.5784	0.000223399	0.00672698
AT5G52570	-1.44596	1.76406	14.3579	0.000247705	0.00730827
AT1G33811	-1.45321	2.70753	28.3882	5.37336e-07	3.76191e-05
AT3G59400	-1.45748	4.56029	81.32	7.2406e-15	2.2323e-12
AT1G22990	-1.46078	1.17396	9.89885	0.00213095	0.0409204
AT4G16640	-1.46881	1.68835	15.3655	0.000154834	0.00497396
AT5G45940	-1.46883	4.66066	89.9045	6.34409e-16	2.42265e-13
AT3G19480	-1.47032	1.59371	14.5511	0.000226264	0.00678893
AT4G30130	-1.47325	1.11286	9.86723	0.00216477	0.0413571
AT2G05070	-1.47858	6.14517	126.609	5.6433e-20	3.87027e-17
AT4G04570	-1.4832	1.41253	12.5733	0.000577367	0.0146766
AT1G55370	-1.48839	1.97495	19.5246	2.34821e-05	0.00103153
AT4G37760	-1.49207	2.96061	37.8413	1.28658e-08	1.32218e-06
AT5G19600	-1.49478	2.96164	36.5121	2.1392e-08	2.10815e-06
AT2G05510	-1.50287	5.37078	127.884	4.19447e-20	3.13234e-17
AT5G59220	-1.50307	4.59609	96.1441	1.15521e-16	4.97704e-14
AT3G50400	-1.51322	2.96023	38.4322	1.0279e-08	1.0761e-06
AT1G70430	-1.51876	1.71493	16.8071	7.9774e-05	0.00287332
AT1G29910	-1.5224	5.75046	108.682	4.39661e-18	2.30856e-15
AT1G54970	-1.52292	4.6254	91.3184	4.29242e-16	1.69702e-13
AT2G40370	-1.52351	2.40639	27.6659	7.23137e-07	4.84084e-05
AT2G24820	-1.52638	3.20564	45.9521	6.41304e-10	8.4278e-08
AT3G02830	-1.52778	3.90281	66.8933	5.65192e-13	1.3282e-10
AT5G27290	-1.52899	1.59315	15.3488	0.000156034	0.00498908
AT5G56090	-1.53112	2.35063	26.6373	1.10717e-06	6.99369e-05
AT2G14220	-1.53136	1.53565	14.8796	0.000194074	0.00596693
AT5G47610	-1.53466	3.40328	51.8966	7.90469e-11	1.28327e-08
AT3G01500	-1.53569	6.24118	149.466	3.4735e-22	3.53719e-19
AT2G28270	-1.54193	1.20794	11.3361	0.00104996	0.0234289
AT1G74880	-1.54225	5.19249	108.046	5.16548e-18	2.67055e-15
AT4G09480	-1.55869	1.29865	12.5684	0.000578698	0.0146993
AT5G23980	-1.55964	1.09462	10.7061	0.00142931	0.0299078
AT4G01975	-1.56565	1.50717	15.0623	0.000178248	0.00556178
AT4G27520	-1.57452	4.88255	112.444	1.71169e-18	9.5869e-16
AT2G32160	-1.57474	1.41441	14.4472	0.00023755	0.00705824
AT2G18630	-1.57668	3.90867	72.7721	9.17119e-14	2.42676e-11
AT5G23190	-1.57848	2.74076	36.452	2.1892e-08	2.15111e-06
AT3G44020	-1.57938	1.24411	12.4636	0.000608565	0.0153535
AT2G46250	-1.57976	1.58018	16.1891	0.000105868	0.00362291
AT5G62380	-1.58248	1.11624	11.096	0.00118051	0.0256938
AT5G23060	-1.58655	5.33077	128.226	3.87452e-20	2.95916e-17
AT5G59540	-1.59956	5.5532	144.641	9.78553e-22	8.88764e-19
AT5G63420	-1.60004	3.83719	72.7231	9.30872e-14	2.4439e-11
AT1G78995	-1.61636	1.26005	12.5214	0.000591905	0.0149444
AT5G14130	-1.62759	2.7109	36.5564	2.10307e-08	2.07864e-06
AT3G47250	-1.63228	1.50468	15.8265	0.000125102	0.00419292
AT5G09530	-1.64018	6.9014	163.026	2.09267e-23	2.70478e-20
AT2G48140	-1.64382	4.82725	120.817	2.21958e-19	1.35616e-16
AT5G09520	-1.64442	4.13222	84.5414	2.86655e-15	9.44417e-13
AT5G05390	-1.64457	1.28116	13.9374	0.000301868	0.00855336
AT1G79900	-1.64526	1.66264	18.658	3.45556e-05	0.00142049
AT5G13930	-1.64946	4.373	100.123	4.00764e-17	1.87051e-14
AT5G13580	-1.65449	5.06553	126.789	5.41208e-20	3.78902e-17
AT2G36000	-1.65938	5.04364	121.786	1.76093e-19	1.11653e-16
AT5G16770	-1.66102	2.6071	36.7654	1.9409e-08	1.92401e-06
AT1G62320	-1.66169	2.44978	33.12	8.01618e-08	6.78548e-06
AT3G10010	-1.66361	2.53363	35.1796	3.57976e-08	3.27787e-06
AT3G56080	-1.66974	3.451	60.5867	4.26967e-12	8.64351e-10
AT5G18362	-1.67114	0.881482	9.82689	0.00220871	0.0419351
AT4G28350	-1.67845	2.2459	29.6806	3.1727e-07	2.36405e-05
AT2G05100	-1.67919	6.09828	153.399	1.51479e-22	1.64209e-19
AT5G55620	-1.70254	2.04989	25.6194	1.69401e-06	0.000103316
AT2G35736	-1.7128	0.810634	9.80985	0.00222755	0.0422378
AT1G66970	-1.71446	0.810073	9.80023	0.00223826	0.0423365
AT5G17780	-1.72132	1.94455	24.928	2.26622e-06	0.000134315
AT3G16660	-1.72157	1.13328	13.3031	0.000407549	0.011014
AT5G08250	-1.73584	1.67685	20.7921	1.34248e-05	0.000645407
AT2G04790	-1.74462	1.47593	17.5604	5.66423e-05	0.00213873
AT5G04140	-1.75038	6.5391	215.836	1.23375e-27	2.59126e-24
AT2G34620	-1.75377	2.73911	43.4207	1.60523e-09	1.94043e-07
AT4G13120	-1.75806	1.22779	15.0482	0.000179415	0.005593
AT1G69310	-1.76033	3.11872	55.5453	2.27605e-11	4.13442e-09
AT1G43590	-1.77016	0.761566	9.87362	0.00215789	0.0412492
AT1G55940	-1.77448	2.21276	31.3361	1.62855e-07	1.28771e-05
AT5G43840	-1.77632	1.17526	14.2539	0.000260101	0.00762099
AT1G05200	-1.77938	2.87541	48.5638	2.53023e-10	3.66502e-08
AT4G28110	-1.79016	1.71839	22.7367	5.7676e-06	0.000307164
AT1G05450	-1.79984	2.26953	31.7984	1.35396e-07	1.08851e-05
AT5G53870	-1.80916	3.56333	73.75	6.81728e-14	1.83276e-11
AT4G33610	-1.8277	5.62978	149.074	3.77597e-22	3.7321e-19
AT1G14770	-1.83399	1.13536	14.9318	0.00018941	0.00586646
AT5G47000	-1.84221	2.682	46.7135	4.88165e-10	6.56192e-08
AT5G45720	-1.89374	2.57903	45.6236	7.21755e-10	9.401e-08
AT5G08600	-1.89567	0.927631	13.0153	0.000467376	0.0123282
AT4G22305	-1.91795	1.4027	19.255	2.64714e-05	0.00114636
AT3G11430	-1.9212	3.79902	97.9606	7.10579e-17	3.2711e-14
AT1G28650	-1.93782	1.71798	26.0402	1.42026e-06	8.78964e-05
AT3G62460	-1.94029	1.28277	18.7149	3.3687e-05	0.00139219
AT3G62820	-1.94071	1.78302	26.7582	1.05293e-06	6.71418e-05
AT3G11040	-1.9504	2.49921	44.8075	9.69112e-10	1.22894e-07
AT3G27690	-1.95263	5.5955	171.919	3.5765e-24	5.00784e-21
AT3G60910	-1.97038	2.73107	53.7774	4.14549e-11	7.14406e-09
AT1G55990	-1.99024	5.16734	171.963	3.54606e-24	5.00784e-21
AT2G05400	-1.99969	0.711419	11.4727	0.000982373	0.0221264
AT1G31800	-2.00712	2.98737	64.8966	1.06331e-12	2.3664e-10
AT2G35660	-2.02652	0.604591	10.879	0.00131295	0.0279605
AT3G11090	-2.03217	0.833824	13.1918	0.000429687	0.0114815
AT3G63140	-2.03635	5.10402	170.313	4.90019e-24	6.58684e-21
AT3G30210	-2.03865	1.11648	17.6734	5.38189e-05	0.0020515
AT1G73250	-2.06743	3.28195	79.2335	1.33098e-14	3.92347e-12
AT4G04360	-2.10634	0.393591	9.62115	0.00244758	0.0453423
AT1G20390	-2.11395	6.18152	275.801	1.13993e-31	2.73624e-28
AT1G04350	-2.1187	1.96153	35.9815	2.62431e-08	2.49124e-06
AT3G30720	-2.13465	0.547111	11.3016	0.00106777	0.0237475
AT5G13900	-2.13479	2.76759	62.2539	2.48298e-12	5.24784e-10
AT4G03540	-2.15433	1.83548	32.0619	1.2191e-07	9.99214e-06
AT1G03770	-2.2022	2.29313	48.6066	2.49228e-10	3.62567e-08
AT5G06090	-2.23871	2.24227	48.6205	2.48005e-10	3.62357e-08
AT1G06330	-2.24576	0.328835	10.1426	0.00188792	0.037254
AT5G28510	-2.26567	3.6024	113.527	1.30846e-18	7.4527e-16
AT4G26390	-2.28045	0.905184	17.087	7.02205e-05	0.00257335
AT3G14210	-2.30185	1.8285	30.6758	2.12257e-07	1.63598e-05
AT3G22840	-2.31764	3.38464	88.134	1.03892e-15	3.75409e-13
AT3G61870	-2.32934	3.99844	143.028	1.38932e-21	1.22863e-18
AT5G48410	-2.37274	1.4526	29.1586	3.92246e-07	2.89701e-05
AT3G19800	-2.37702	2.05535	45.5971	7.28664e-10	9.45434e-08
AT1G56650	-2.39839	0.258602	10.2668	0.00177525	0.0356163
AT2G29650	-2.40506	3.7657	126.982	5.17356e-20	3.6991e-17
AT1G70630	-2.40846	1.19346	23.9162	3.48041e-06	0.000195584
AT1G07440	-2.40993	3.23992	90.3362	5.62905e-16	2.1743e-13
AT1G20400	-2.41041	0.603348	14.0715	0.00028339	0.00810496
AT3G55500	-2.50288	2.0463	47.7646	3.35737e-10	4.76053e-08
AT3G48580	-2.5093	0.662234	15.3836	0.000153537	0.00494689
AT1G79890	-2.56781	0.363633	12.6918	0.000545495	0.0140243
AT2G34940	-2.57883	1.97337	50.6266	1.22777e-10	1.87541e-08
AT2G37890	-2.58449	0.860879	20.1033	1.81759e-05	0.000825408
AT3G17700	-2.63142	2.35898	68.3271	3.60649e-13	8.65687e-11
AT3G57300	-2.64073	5.41642	345.911	1.18471e-35	4.42358e-32
AT1G71480	-2.65166	0.426399	14.1177	0.000277297	0.00794421
AT4G21970	-2.71263	0.0311921	9.64898	0.00241377	0.0449353
AT1G60260	-2.7577	0.861625	21.9456	8.11808e-06	0.000417138
AT4G10690	-2.76589	1.57167	41.0903	3.79016e-09	4.25981e-07
AT1G11330	-2.77213	0.295411	13.0317	0.000463729	0.0122513
AT4G04850	-2.84794	2.4255	78.2176	1.79466e-14	5.1991e-12
AT3G24100	-2.99687	4.59496	291.137	1.33852e-32	3.7484e-29
AT5G50950	-3.03617	-0.05384	10.4842	0.0015944	0.0326309
AT3G58930	-3.12634	1.54373	47.0397	4.34502e-10	5.9254e-08
AT5G26040	-3.35252	2.06329	78.3584	1.72169e-14	5.03107e-12
AT2G32880	-3.42818	-0.192688	10.6792	0.00144831	0.0302677
AT2G17260	-3.45083	0.816997	28.4204	5.30295e-07	3.72815e-05
AT4G12830	-3.49825	-0.144183	11.5518	0.000945307	0.0215224
AT2G17442	-3.51425	-0.144367	11.7901	0.00084209	0.019679
AT4G14690	-3.55875	2.33546	96.9767	9.24046e-17	4.19629e-14
AT3G48470	-3.67511	1.58989	60.6695	4.1557e-12	8.51539e-10
AT2G05300	-3.82146	0.0749416	15.8113	0.000125981	0.00420834
AT2G20720	-3.8353	1.13926	42.721	2.07456e-09	2.43761e-07
AT3G13400	-3.97979	2.0214	92.0914	3.47101e-16	1.40534e-13
AT5G25040	-4.43561	1.01825	44.0402	1.28047e-09	1.58783e-07
AT1G15980	-5.11497	2.52513	155.974	8.85791e-23	1.06311e-19
AT4G19950	-5.21598	2.61918	177.913	1.12218e-24	1.71412e-21
AT1G11250	-6.07159	-0.576551	11.9377	0.00078646	0.0186503
AT4G11900	-6.25246	-0.455433	13.9291	0.000304263	0.00858671
AT3G01345	-6.25714	-0.455029	14.0185	0.000291728	0.00830102
AT3G62455	-6.41795	-0.343181	15.9662	0.000117892	0.00398569
AT2G40570	-7.06401	2.14906	150.011	3.09359e-22	3.24875e-19

## Sheet: TPM
Supplementary File 7: Differentially regulated genes (TPM (Transcripts Per Kilobase Million)) in untreated ino80-8, een-2 and arp5-1 seedlings
ID	Col-0 rep1	Col-0 rep2	een-2 rep1	een-2 rep2	ino80-8 rep1	ino80-8 rep2	arp5-1 rep1	arp5-1 rep2
AT3G18710	14.39	14.91	16.48	19.36	14.31	15.35	13.4	13.94
AT4G25880	23.96	19.6	20.53	19.46	20.54	20.01	11.97	14.33
AT1G71695	203.59	230.86	226.88	209.74	246.31	242.21	98.96	117.72
AT5G41480	9.52	9.16	10.62	10.49	9.76	12.23	9.13	11.15
AT1G32045	0	0	0	0	0	0	0	0
AT5G15008	0	8.95	0	0	0	0	0	0
AT3G18310	3.86	3.73	3.91	4.34	3.11	4.38	2.98	3.18
AT4G26490	2.03	1.78	1.58	2.35	1.87	1.8	0.98	2.07
AT5G46240	12.56	14.91	16.03	14.3	9.15	9.85	7.15	8.93
AT5G62260	6.96	7.56	3.68	4.82	6.03	7.2	3.26	4.82
AT3G25717	139.2	167.24	163.71	169.62	224.53	212.58	126.16	85.68
AT5G44313	0	0	0	0	0	0	0	0
AT5G35715	0	0	0	0.07	0	0	0	0
AT5G41908	0	0	0	0	0	0	0	0
AT2G21390	83.84	72.03	87.81	88.55	68.89	74.51	74.47	95.88
AT3G48330	28.69	26.63	23.98	22.98	29.59	26.63	20.93	16.52
AT4G32710	11.14	13.75	13.89	14.84	12.35	12.46	8.76	13.52
AT4G13259	0	0	0	0	0	0	0	0
AT2G21930	0.27	0	0	0.07	0.34	0	0.25	0.08
AT3G53910	0	0	0	0	0	0	0	0
AT1G71528	1.23	1.08	1.75	1.94	0.93	0.95	1.12	0.8
AT4G25090	10.19	8.98	15.37	13	11.65	11.2	19.54	19.15
AT2G18870	0	0	0	0	0	0	0	0
AT1G64560	0	0	0	0.32	0	0	0.42	0
AT1G56250	0	0.16	0	0	0.3	0.8	0	0
AT3G16830	29.98	27.33	24.82	25.87	25.06	25.12	18.84	23.8
AT5G50110	3.92	3.08	3.37	4.88	3.79	3.35	3.07	7.89
AT3G03305	15.27	13.79	16.95	17.39	16.76	14.38	15.43	18.07
AT5G66670	0	0.35	0	0.15	0	0.27	0.15	0.2
AT2G38310	96.46	83.91	85.23	108.16	94.29	115.19	74.87	61.23
AT5G23000	0.31	0.55	0.44	0.09	0.13	0.81	0.12	0.19
AT2G12195	0	0	0	0	0	0	0	0
AT5G03560	14.95	21.22	12.84	12.03	24.2	21.99	13.88	13.02
AT1G28940	0	0	0	0	0	0	0	0
AT1G76280	5.17	4.83	4.77	4.69	4.8	3.53	5.42	6.88
AT3G03272	0	0	0.2	0.15	0	0	0	0.09
AT3G28960	0.34	0.89	0.24	0.28	0.28	0.5	0	0.05
AT3G10210	31.88	31.45	27.03	29.05	29.35	37.13	25.86	26.18
AT1G71390	0	0	0	0	0	0	0	0
AT3G42718	0	0	0	0	0	0	0	0
AT2G11130	0	0	0	0	0	0	0	0
AT4G29180	4.49	4.8	8.36	6.06	6.15	5.04	13.65	12.46
AT1G15210	67.07	63.26	85.62	85.19	65.68	61.79	65.25	85.09
AT3G63470	34.89	38.31	42.35	43.29	34.16	38.65	21.63	25.41
AT2G46620	17.34	16.3	17.46	18.1	14.25	16.23	15.71	15.54
AT2G43750	78.21	91.13	79.12	85.04	68.24	80.43	68.75	61.96
AT2G24490	9.69	8.15	10.86	13.14	11.01	11.44	20.61	23.31
AT3G13820	0	0	0	0.09	0	0	0.06	0.3
AT2G15080	0	0	0	0	0.1	0.13	0	0
AT1G16360	0.51	0.6	0.61	1.03	0.57	0	1.08	0.21
AT3G49770	0	0	0	0	0.2	0	0	0
AT4G31660	0	0	0	0	0.15	0	0.13	0
AT1G26670	113.69	112.55	83.7	83.33	122.53	131.64	100.67	82.79
AT3G09505	0	0	0	0	0	0	0	0
AT1G52200	42.18	34.69	41.23	33.99	68.17	66.58	20.03	16.24
AT1G57800	0.28	0	0.2	0.1	0	0	0.1	0.06
AT4G23200	0	0	0	0	0	0	0	0
AT1G69460	109.76	101.33	140.85	140.98	138.21	130.82	156.51	150.07
AT4G10980	0	0	0	0	0	0	0	0
AT1G08080	0	0	0	0	0	0	0	0
AT5G15420	0	0	0	0	0	0	0	0
AT4G29810	59.9	50.7	60.11	71.41	58.93	59.21	79.4	80.79
AT1G80870	8.98	8.38	10.6	8.71	8.98	10.6	8.25	10.35
AT5G18730	0.24	0.07	0.63	0.35	0.4	0.48	0.87	1.32
AT5G67570	11.56	18.59	15.4	12.34	13.28	18.13	7.77	9.84
AT1G75310	8.84	7.6	9.69	9.86	9.56	8.13	10.14	13.19
AT2G13160	0	0	0.06	0	0	0	0	0
AT5G57625	71.04	76.81	139.48	118.85	90.31	66.29	177.39	187.27
AT1G14315	0	0	0	0.19	0	0	0	0
AT4G35440	4.47	4.86	3.67	4.25	3.66	5.46	3.03	2.65
AT3G55380	34.75	32.95	40.51	46.78	41.62	41.94	34.88	40.06
AT1G05250	0	0	0	8.97	0	0	0	1.73
AT3G44560	0	0	0	0	0	0	0	0.12
AT1G58010	0	0	0	0	0	0	0	0
AT5G51680	24.32	23.08	24.63	19.49	28.36	33.2	11.13	9.36
AT4G10925	13.91	15.81	11.43	11.33	12.51	13.86	7.44	8.85
AT5G35113	0	0	0	0	0	0	0	0
AT1G12790	7.55	7.88	4.74	5.13	6.03	5.71	5.23	3.91
AT2G37260	5.91	5.17	6.55	7.83	5.83	7.88	6.81	10.57
AT5G54610	0	0	0	0	0	0	0	0
AT4G13550	3	2.38	2.88	3.02	2.21	3.67	2.17	2.8
AT5G20560	0	0	0	0.11	0	0	0	0
AT1G31760	3.21	6	2.28	3.32	3.7	4.16	2.53	4.19
AT1G74000	3.79	4.76	3.46	3.78	4.53	3.74	4.24	2.96
AT3G48480	0.17	0.61	0.61	1.34	0.87	1.41	1.48	1.61
AT2G10070	0	0	0	0	0	0	0	0
AT1G53903	18.98	19.25	19.16	12.26	21.07	13.22	13.82	10.32
AT3G63400	24.12	28.42	26.39	28.48	26.32	29.56	21.67	28.76
AT1G19715	9.16	17.34	11.12	10.49	11.26	12.89	3.58	8.34
AT5G62750	0.34	0	0	0	0	0	0	0
AT5G50000	115.92	112.86	130.28	125.04	133.84	135.44	121.27	125.84
AT1G69430	1.24	1.64	1.24	0.96	0.83	0.64	1.16	0.96
AT1G53340	5.86	5.07	5.9	5.98	4.09	3.25	3.76	3.54
ATCG00160	0.31	0.83	2.46	0.69	3.42	3.03	0.47	0.1
AT1G33580	0.16	0	0	0	0	0	0	0
AT3G24110	7.19	8.04	9.04	5.4	6.83	6.52	4.73	6.23
AT1G80290	17.47	15.47	13.93	14.49	12.99	15.61	15.13	14.21
AT1G56540	2.84	1.94	1.73	2.17	1.7	2.23	0.91	0.97
AT3G20920	57.75	55.29	63.6	60.9	55.9	60.47	72.21	68.09
AT5G26220	1.37	1	1.13	1.13	2.48	1.18	1.95	2.11
AT3G09190	0.68	1.04	3.73	4.23	3.41	3.14	4.61	5.3
AT3G05545	67.21	60.35	61.06	65.73	64.11	57.59	40.33	47.69
AT4G27400	6.71	5.55	3.5	4.68	3.63	3.65	4.7	6.4
AT5G61930	4.48	3.87	2.62	3.12	2.53	3.9	4.62	4.77
AT1G69860	0	0	0	0	0	0	0	0
AT1G10120	30.22	34.32	42.37	48.43	37.38	45.02	34.4	41.97
AT5G08760	0.71	0	0	0	0	1.05	0	0.43
AT2G38390	23.94	16.49	6.66	6.83	9.53	14.34	2.75	1.66
AT2G25250	88.93	74.72	100.58	98.78	89.31	86.34	49.89	64.71
AT1G51990	0.19	0	0	0	0	0	0	0
AT3G28370	3.91	4.08	2.78	5.11	5.11	3.61	4.36	5.88
AT2G15710	0	0	0	0	0	0	0	0
AT5G20250	134.1	105.34	62.25	82.34	171.86	179.21	35.07	34.79
AT4G05220	1.99	2.63	3.77	3.66	3.33	2.45	1.48	1.74
AT4G04730	0	0	0	0	0	0	0	0
AT5G55045	0	0	0	0	0	0	0	0
AT3G29010	2.95	3.77	4	4.14	7.63	6.94	7.18	8.18
AT4G34800	19.97	17.55	28.35	28.47	22.6	33	50.22	45.16
AT1G63430	24.21	23.9	28.17	25.4	23.84	27.39	14.6	17.59
AT4G06581	0	0	0	0	0	0	0	0
AT1G08460	34.58	30.66	28.18	26.29	41.91	42.28	16.14	17.78
AT1G78710	0	0	0	0	0	0	0	0
AT4G03820	31.25	28.36	33.32	32.06	27.54	26.96	18.84	16.31
AT2G26330	50.15	63.38	57.24	69.11	42.15	44.33	41.28	52.09
AT1G08610	1.5	2.06	1.86	2.69	1.96	1.8	2.31	3.69
AT3G57620	0	0	0	0	0	0	0	0
AT5G08070	0.31	0.27	0.22	0.17	0.77	0.23	0.11	0.66
AT1G17540	0.07	0.13	0.37	0.58	0.38	0.11	1.15	1.21
AT3G29798	0	0	0	0	0	0	0	0
AT1G27380	16.55	16.11	11.37	11.04	14.58	14.08	10	9.57
AT1G58643	0.05	0	0.07	0.05	0.12	0	0.07	0.01
AT1G56810	0	0	0	0	0	0	0	0
AT5G14030	194.64	170.92	224.24	248.97	189.81	193.9	273.87	274.27
AT1G48953	0	0	0	0	0	0.84	0	0
AT5G34945	0	0	0	0	0	0	0	0
AT2G02310	0.46	0	0.16	0	0.19	0.68	0	0.07
AT4G11020	9.6	6.24	17.78	8.74	8.73	8.02	0.93	0.64
AT3G50670	54.03	61.7	55.32	62.47	51.18	64.1	36.32	54.75
AT2G07719	0	0.28	0.45	0.35	0	0.71	0	0.49
AT5G45440	2.94	3.02	2.56	2.86	1.1	1.33	1.59	2.18
AT2G13520	0	0	0	0	0	0	0	0
AT4G05110	0.28	0.25	0.1	0.16	0.24	0	0	0.04
AT5G25380	0.46	1.36	0.66	1.02	0.91	0.91	0.58	0.76
AT3G44080	0	0	0	0	0	0	0	0
AT5G56920	0	0	0	0	0	0	0	0
AT5G38000	22.72	18.94	7.92	5.02	19.28	17.26	5.75	5.89
AT5G15050	17.34	18.91	25.65	32.75	22.47	23.28	35.32	39.08
AT1G80840	3.78	3.32	2.68	2.27	2.44	2.29	1.98	2.28
AT5G53670	0	0	0.21	0	0	0	0	0.19
ATCG00920	255.11	1371.12	878.25	214.64	458.86	315.05	477.44	165.8
AT2G23160	0	0	0	0	0	0	0	0
AT1G60545	7.16	9.4	8.55	7.7	6.48	8.16	5.34	4.85
AT4G29940	7.04	6.61	8.99	8.19	7.66	8.25	6.3	9.36
AT3G09550	0.55	1.13	0.98	0.86	0.08	0.41	0.38	0.17
AT5G44630	0	0	0	0	0	0	0.09	0
AT2G40900	41.05	34.9	28.27	22.27	32.29	33.32	12.12	11.34
AT2G39140	14.89	14.48	16.09	23.79	14.7	14.28	13	18.46
AT3G48670	9.31	10.86	9.29	11.69	8.24	7.21	19.27	30.58
AT3G11270	19.72	15.74	20.51	23.74	25.39	23.35	29.04	29.29
AT4G29330	66.18	56.59	66.89	64.08	73.83	64.68	61.28	67.57
AT5G48545	79.74	88.8	81.57	85.12	97.15	94.55	58.02	54.43
AT1G49490	0.91	0.33	0.65	0.79	0.7	1.01	0.59	1.15
AT3G08530	76.9	69.96	75.66	79.18	66.99	63.49	63.3	88.23
AT2G19190	0.57	0.38	0.61	0.2	0.3	0.32	0.4	0.2
AT3G22380	69.97	61.06	56.33	50.12	57.89	53.99	27.24	41.81
AT2G41835	7.34	7.62	9.23	6.98	9.07	11.34	7.64	9.53
AT3G05140	1.05	1.01	1.97	1.9	1.52	1.34	0.5	0.74
AT1G48690	21.82	23.5	24.81	22.93	32.28	26.24	20.77	15.62
AT1G49570	122.97	127.9	62.02	89.28	96.92	92.37	31.42	39.71
AT2G39110	28.89	31.69	28.95	27	25.62	27.12	35.26	30.2
AT4G32660	22.52	26.54	26.42	22.61	24.59	26.21	16.33	18.77
AT1G75580	5.91	4.1	6.41	8.18	6.25	5.75	9.71	9.38
AT5G45920	9.07	10.91	7.62	9.2	15.17	11.99	13.05	16.48
AT3G52760	22.79	17.95	19.93	17.68	19.98	20.89	15.01	13.63
AT5G52750	0.72	0.95	0.25	0.4	0.6	1.33	0.93	0.33
AT5G18830	26.16	24.13	25.33	21.78	25.07	22.35	16.95	20.14
AT3G27460	12.01	11.35	12.23	11.78	13.12	10.35	8.53	8.85
AT2G38910	0	0	0	0	0	0	0.04	0
AT3G32320	0	0	0	0	0	0	0	0
AT1G12720	0	0	0	0	0.38	0	0	0
AT3G28945	1.09	0.99	0.89	0.98	0.75	0.83	0.16	0.18
AT2G36060	142.14	139.11	132.12	132.09	135.45	157.67	135.37	113.68
AT4G04360	2.32	4.76	1.1	1.92	0.65	0	1	2.02
AT2G07684	0	0	0	0	0	0	0	0
AT1G72980	0	0	0	0	0	0	0	0
AT5G51840	14.79	22.53	20.07	24.37	17.46	20.77	36.55	36.52
AT4G17490	8.81	5.46	7.68	7.72	10.72	9.03	3.35	3.52
AT2G32950	18	18.65	17.71	17.06	18.03	18.19	15.78	16.96
AT2G24420	52.2	52.11	53.38	49.63	62.25	53.45	44.51	51.92
AT5G21930	12	15.17	8.45	8.94	11.99	11.67	2.15	3.46
AT5G33259	0	0	0	0	0	0	0	0
AT3G33555	0	0	0	0	0	0	0	0
AT1G26440	51.34	47.56	28.52	25.71	37.14	37.3	22.63	17.68
AT1G22070	21.13	17.28	19.42	18.24	24.1	21.37	14.7	12.52
AT3G55990	25.69	27.15	25.39	20.92	20	20.26	11.44	14.18
AT3G43940	0	0	0	0	0	0	0	0
AT2G40750	0.61	0.27	0.86	0.42	1.14	0.34	0	0.19
AT3G54900	35.76	39.48	29.02	34.14	30.11	33.33	22.34	28.27
AT3G12910	0	0	0	0.12	0.19	0	0	0
AT1G73603	0	0	0	0	0	0	0	0
AT4G07456	0	0	0	0	0	0	0	0
AT3G25730	21.55	25.93	26.48	33.5	25.57	22.26	24.09	27.5
AT2G28960	4.34	3.7	4.21	4.48	8.07	6.52	1.85	1.62
AT4G27395	0	0	0	0	0	0	0	0
AT3G48680	69.76	84.85	66.21	68.33	70.4	75.11	61.66	75.56
AT2G04842	17.78	26.49	21.61	23.46	15.31	18.05	10.45	18.66
AT3G63360	5.68	2.5	2.02	2.35	2.38	1.05	28.42	10.59
AT2G14455	0	0	0	0	0	0	0	0
AT3G18010	7.64	15.47	8.08	8.22	5.65	7.62	3.04	3.62
AT4G12000	9.02	9.08	11.84	8.34	11.32	8.82	6.02	6.17
AT1G29880	35.6	31.3	34.65	41.05	28.08	33.13	36.82	48.65
AT4G04550	0	0	0	0	0	0	0	0
AT5G27280	23.58	31.83	30.81	21.69	37.42	26.34	21.41	18.33
AT3G46070	0	0	0	0	0	0	0	0
AT3G19120	16.41	16.86	17.21	15.95	17.86	18.64	8.46	15.86
AT3G56408	3.78	2.96	4.66	3.8	3.57	3.52	2.24	3.28
AT3G01840	0.4	0.26	0.07	0.49	0.5	0.66	0.26	0.55
AT2G20690	19.06	20.19	22.59	30.48	20.92	21.26	22.75	35.64
AT1G65585	0	0	0	0	0	0	0	0
AT5G28527	0	0	0	0	0	0	0	0
AT5G10110	5.89	5.97	8.36	10.06	8.71	10.27	12.77	12.35
AT3G14290	65.01	73.21	78.03	83.7	73.26	70.43	115.4	122.92
AT3G23090	138.13	119.82	161.32	153.55	170.06	150.23	145.22	118.92
AT3G08690	56.74	47.76	49.32	44.42	58.4	59.73	47.52	41.74
AT2G01830	20.88	19.76	23.53	23.61	20.89	18.77	21.41	23.56
AT3G48540	1.29	1.41	5.93	6.91	4.84	2.14	5.37	8.41
AT1G06240	7.21	5.88	8.94	7.01	5.82	6.69	4.89	5.88
AT5G05050	0	0	0	0	0	0	0	0
AT1G72330	15.15	15.3	19.27	18.94	17.77	19.85	18.82	19.59
AT3G31990	0	0	0	0	0	0	0	0
AT1G35300	0	0	0	0	0	0	0	0
AT5G42470	23.77	22.2	25.36	26.76	22.26	25.74	19.1	22.18
AT1G57040	0	0	0	0	0	0	0	0
AT3G36659	0	0	0.39	0.15	0	0	0	0.08
AT4G33040	23.73	24.37	29.32	31.33	25.59	23.58	22.84	15.94
AT1G45050	46.09	59.29	42.02	42.16	42.61	43.12	31.09	31.11
AT5G61770	11.53	9.34	10.64	16.51	13.25	11.4	10.32	19.96
AT1G10430	40.73	39.37	41.01	42.5	41.63	41.81	41.59	45.04
AT2G31865	3.67	3.51	2.83	3.18	3.49	2.79	2.62	3.14
AT3G54630	3.25	2.59	4.69	4.37	4.51	4.43	4.62	6.32
AT1G05670	2.25	2.39	1.79	2.23	1.56	1.31	1.27	1.83
AT1G64110	47.83	65.24	67.72	45.97	51.55	52.43	81.23	104.15
AT1G65220	92.53	92.34	93.7	93.6	98.08	107.27	98.15	98.36
AT2G29080	37.34	34.22	32.76	38.68	37.69	34.25	27.23	38.26
AT4G03635	7.8	10.57	6.23	6.26	7.34	8.17	7.12	6.8
AT5G45095	1.63	0.83	2.76	2.53	4.44	1.74	1.32	1.28
AT2G46280	122.46	112.66	94.63	116.77	96.17	98.89	132.53	168.44
AT4G34200	75.69	70.84	108.02	125.96	90.2	92.98	130.18	175.96
AT2G19870	3.37	3.24	7.23	9.26	6.95	6	9.79	13.64
AT5G35660	0.33	0.14	19.8	14.54	15.16	10.61	92.6	134.16
AT3G07115	0	0	0	0	0	0	0	0
AT2G14210	12.89	6.16	3.63	9.08	6.5	4.9	1.41	1.87
AT2G21570	0	0	0	0	0	0	0	0
AT3G29150	0	0	0.17	0	0	0	0	0.08
AT3G54530	0	0	0.94	0	0.49	0	0	0
AT4G12800	440.41	612.26	198.33	301.78	276.17	343.41	69.95	79.9
AT3G54410	0.23	0	0	0.25	0.19	0.5	0.17	0
AT1G07310	72.52	68.95	60.27	51.76	74.44	75.35	28.11	31.85
AT1G77230	10.17	9.87	8.67	8.74	8.51	8.75	7.11	8.89
AT2G44440	8.57	8.22	9.48	10.91	9.13	7.08	10.09	14.71
AT4G30993	20.82	20.81	25.51	23.13	26.76	24.7	16.98	20.95
AT3G57440	0.18	0.49	0.39	0.51	0.15	0.14	0.41	0.74
AT5G60260	0	0	0.54	0	0.64	0.56	0	0.23
AT5G14740	872.95	1635.86	311.8	267.55	454.64	594.43	115.95	130.39
AT5G54225	1.53	0	0	0	0	0	0	0
AT5G47510	1.38	1.67	2.7	2	3.04	3.07	2.19	2.08
AT1G14880	0	0	0	0.16	0	0	0	0.09
AT5G32512	0	0	0	0	0	0	0	0
AT5G26147	0	0	0	0	0	0	0	0
AT4G34350	101.85	130.6	84.99	92.9	90.49	96.46	57.87	77.02
AT2G30730	0	0	0	0	0	0	0	0
AT3G23070	11.11	12.02	8.73	15.07	9.79	9.87	8.45	15.63
AT5G16950	5.01	8.8	10.31	9.38	7.03	8.14	25.94	30.34
AT2G23690	8.38	10.53	11.22	11.48	10.22	11.33	11.05	7.68
AT2G40710	4.32	0	1.57	2.69	0	2.11	1.28	1.45
AT1G69792	0	0	0	0	0	0	0	0
AT3G33124	0	0	0	0	0	0	0	0
AT1G26650	32.61	24.82	39.81	44.87	37.21	39.37	33.72	34.56
AT5G20300	12.1	16.65	12.9	12.02	13.03	14.78	10.26	12.42
AT3G01550	0.13	0.12	0.1	0.15	0.23	0.2	0	0.21
AT2G02930	1.13	0.4	0.96	1	1.32	2.17	4.71	4.12
AT4G22320	5.74	8.79	9.96	12.1	8.08	9.03	17.87	23.29
AT2G32040	21.58	23.07	20.79	22.31	18.31	18.58	12.89	13.3
AT5G45850	0.23	0.31	1.56	1.21	0.87	0.34	2.94	1.93
AT3G03740	23.24	21.72	23.19	23.25	20.77	22.88	22.94	27.55
AT3G62620	3.79	5.55	7.38	6.04	3.9	7.36	7.88	7.32
AT2G34940	4.53	4.68	0.56	0.87	0.82	0.8	0.73	1.22
AT3G51780	14.84	14.95	14.78	17.48	15.07	13.5	19.57	17.13
AT4G05130	0.32	0.71	0.46	0.81	0.54	1.32	0.24	0.15
AT5G11320	0.91	0.5	0.64	0.84	0.54	0.67	0.64	0.33
AT2G20320	10.26	7.2	7.7	8.04	8.17	6.94	6.56	6.49
AT3G14880	2.77	0.83	2.85	2.19	4.62	3.13	10.15	8.35
AT4G25670	36.19	47.36	40.81	35.15	51	39.61	66.65	51.57
AT2G27300	0.42	1.65	3.85	1.26	3.49	1.23	2.1	2.06
AT3G59110	19.22	16.47	15.24	18.01	13.31	16.7	13.42	13.32
AT3G04570	36.08	31.84	26.68	25.34	38.26	34.59	19.74	22.54
AT5G59120	0	0	0	0	0	0	0	0.03
AT2G31800	57.75	59.08	53.79	49.85	68.34	63.39	40.44	34.95
AT5G43420	2.49	0.61	2.35	2.05	3.12	2.04	1.96	3.37
AT1G74240	2.21	2.36	4.71	4.44	3.04	3.51	4.77	5.38
AT3G10320	10.88	10.69	9.24	6.7	8.57	6.79	4.22	5.41
ATCG00065	0	0	0	0	0	0	0	0
AT3G28917	0.26	0.23	0	0	0.22	0.19	0.1	0.16
AT3G19960	12.21	12.15	14.06	16.45	15.08	15.07	10.04	15.43
AT3G14820	0	0	0	0	0	0	0	0
AT3G43302	0	0	0	0	0	0	0	0
AT5G22315	0	0	0	0	0	0	0	0
AT3G45630	15.3	13.54	14.64	15.38	14.09	15.18	12.08	14.59
AT3G42783	0	0	0	0	0	0	0	0
AT4G27140	1.28	2.24	14.73	3.87	66.54	18.88	18.85	19.84
AT2G36420	50.77	58.69	45.55	34.58	53.78	55.62	17.37	19.17
AT2G33580	5.38	6.26	4.25	3.73	2.76	4.37	2.75	2.69
AT5G53330	55.91	46.13	52.17	55.08	63.38	64.61	49.5	49.49
AT1G65820	189.88	165.92	197.78	181.06	208.16	190.79	239.21	190.91
AT1G22900	1.53	0.9	1.27	1.83	0.43	0.57	0.19	0.08
AT5G61700	0	0	0	0	0	0	0	0
AT2G07880	0	0	0	0	0	0	0	0
AT1G69140	0	0	0	0	0	0	0	0
AT1G52080	7.45	6.99	5.58	5.67	6.72	6.68	6.77	5.44
AT1G35180	26.59	30.11	26.02	29.55	25.05	25.68	25.13	35.12
AT1G30070	8.03	9.41	10.13	18.05	16.6	15.49	31.77	30.19
AT1G35210	0	0.78	1.46	0.16	0.74	1.74	0.44	0.18
AT3G12050	36.26	37.04	36.76	47.48	37.62	43.83	43.19	57.16
AT3G03341	21.14	21.89	54.37	34.42	38.91	23.4	88.22	80.9
AT5G07160	0	0	0	0	0	0	0	0
AT1G73740	22.68	21.19	17.97	15.1	21.08	24.95	10.88	9.77
AT4G16780	27.26	32.77	34.83	37.79	35.89	40.95	91.24	77.78
AT1G34110	20.55	24.39	19.76	20.09	16.67	16.5	11.98	17.86
AT3G15970	16.17	16.72	16	19	17.34	19.54	19.2	25.38
AT3G01970	5.14	5.54	6.3	4.37	8.2	7.25	9.29	6.77
AT4G33905	3.76	2.95	4.91	2.4	3.64	2.34	2.5	2.93
AT2G40360	17.86	14.91	19.8	24.08	17.78	21.52	28.19	42.15
AT3G11970	0	0	0	0	0	0	0.68	0.55
AT1G33890	0.21	0	0.15	0.81	0.7	0.31	1.32	1.23
AT1G08040	29.05	26.2	32.54	29.82	28.32	26.55	36.1	33.03
AT3G47670	74.85	73.12	72.22	74.64	65.15	64.02	35.77	33.71
AT1G63522	0	0	0.87	0	0	0	0	0
AT5G09900	72.82	80.42	93.78	103.65	74.7	87.8	121.47	133.3
AT3G30778	0	0	0	0	0	0	0	0
AT5G64920	64.5	72.65	54.38	55.52	63.84	70.68	47.81	40.36
AT1G38550	0	0	0	0	0	0	0	0
AT3G27190	46.07	39.48	46.77	45.68	49.81	47.51	39.68	33.83
AT1G10522	13.14	14.95	20.46	35.94	19.27	17.35	32.54	37.88
AT4G04370	2.31	1.72	1.51	1.52	1.41	0.99	1.16	1.51
AT4G34970	66.86	78.69	67.7	60.65	69.73	72.59	52.83	51.27
AT5G60470	0.15	0.13	0	0.16	0	0	0	0
AT5G10430	3428.48	2365.96	2524.35	2547.01	2102.02	2223.69	1638.03	1087.36
AT3G10130	4.97	8.23	10.04	6.74	8.15	11.27	19.07	18.29
AT4G08655	0	0	0	0	0	0	0	0
AT2G24660	0.05	0	0.03	0.03	0	0	0.03	0
AT3G54826	15.37	12.42	19.72	17.89	17.42	16.13	19.74	20.18
AT1G69080	20.22	17.73	14.59	19.58	19.14	18.69	10.22	10.05
AT5G56747	12.16	14.92	14.33	12.25	11.89	13.22	10.24	9.69
ATMG01350	0	0	0.42	0.33	0	0.44	0	0
AT5G36650	0	0	0	0	0	0	0	0
AT3G10680	2.73	2.04	1.55	1.18	2.28	1.01	0.71	0.89
AT1G73300	34.23	31.1	33.92	25.34	41.89	41.71	8.08	7.11
AT4G08030	0	0	0	0	0	0	0	0
AT3G52590	299.96	295.08	373.4	512.04	332.62	335.57	1407.25	1170.68
AT5G47840	44.81	53.18	41.34	52.63	54.96	54.52	44.09	47.35
AT2G42240	11.79	9.4	9.67	9.93	9.08	9.72	8.17	9.48
AT5G04850	49.72	56.53	66.37	64.68	78.74	65.27	80.85	65.6
AT1G05760	15.97	17.22	9.53	8.99	10.32	19.05	2.02	4.13
AT1G30530	8.52	10.52	13.85	18.1	9.92	9.94	21.75	30.7
AT5G34839	0	0	0	0	0	0	0	0
AT2G12000	0	0	0	0	0	0	0	0
AT4G04276	0	0	0	0	0	0	0	0
AT1G73570	1.3	2.2	1.77	2.63	1.45	1.93	2.03	2.59
AT2G17610	0	0	0	0	0	0	0	0
AT5G32471	0	0	0	0	0	0	0	0
AT5G59010	69.87	62.04	63.9	73.06	59.18	69.9	57.47	53.11
AT5G45595	0	0	0	0	0	0	0	0
AT5G50115	0	0	0	0	0	0	0	0
AT4G05049	0	0	0	0	0	0	0	0
AT1G66150	79.72	81.55	85.05	81.89	83.94	94.23	52.72	64.05
AT5G45790	1.78	2.74	1.69	2.53	2.32	0.88	1.67	2.52
AT5G27700	168.46	175.11	175.94	234.03	167.79	178.64	245.18	301.53
AT4G06532	0	0	0	0	0	0	0	0
AT4G06582	0	0	0	0	0	0	0	0
AT2G30460	26.08	24.54	26.04	31.75	16.35	18.26	22.17	22.47
AT2G11700	0	0	0	0	0	0	0	0
AT5G19970	31.59	37.13	24.86	22.53	31.37	33.06	11.97	13.28
AT5G48430	7.2	4.26	6.59	4.65	13.09	19.97	1.14	1.58
AT5G18755	0	0	0	0	0	0	0	0
AT5G18130	60.7	54.64	30.36	24.2	50.38	50.61	22.68	24.75
AT1G77120	12.57	10.2	21.57	27.46	34.21	9.8	9.21	7.64
AT1G50590	3.42	4.01	3.4	2.89	4.39	3.54	3.31	3.16
AT5G05470	12.87	14.81	16.62	21.53	10.64	12.69	25.93	34.34
AT3G33537	0	0	0	0	0	0	0	0
AT4G27670	0.45	0	0	0	0.19	0.17	0	0.28
AT1G08005	0	0	3.34	2.59	3.93	3.47	0	2.57
AT4G08347	0	0	0	0	0	0	0	0
AT3G28300	105.31	120.62	136.04	111.28	122.18	107.22	0.71	0.37
AT4G08810	46.61	45.43	49.72	56.45	49.47	46.18	46.38	66.12
AT2G07813	0	0	0.27	0	0	0	0	0
AT3G32980	1599.97	1297.71	996.5	801.1	1069.18	1036.93	468.49	384.02
AT4G29580	0	0	0	0	0	0	0	0
AT4G14226	0	0	0	0	0	0	0	0
AT3G62200	11.91	6.84	6.66	6.46	5.88	6.24	7.17	8.02
AT4G21600	96.75	86.61	92.42	88.66	105.15	100.63	114.39	94.71
AT3G54060	0.69	0.52	0.93	1.37	0.2	0.96	0.75	0.81
AT3G19830	7.93	7.24	8.67	9.25	9.28	7.27	7.57	7.56
AT3G03780	67.68	67.2	82	87.88	59.18	61.62	109.01	123.15
AT3G54110	71.28	67.95	105.33	112.66	88.3	90.23	147.96	145.08
AT5G12430	15.6	12.06	13.46	13.81	14.19	13.7	10.67	14.04
AT4G03350	0	0	0	0	0	0	0	0
AT1G77760	98.19	107.18	71.38	78.94	46.34	42.76	45.63	65.54
AT3G06150	13.53	17.67	16.93	20.05	14.33	16.05	12.75	13.86
AT4G06614	0	0	0	0	0	0	0	0
AT5G46845	0	0	0	0	0	0	0	0
AT3G52750	10.7	11.46	12.82	14.93	10.26	10.38	14.51	15.9
AT1G51410	0	0	0	0	0	0	0	0
AT5G27810	0	0	0	0	0	0	0	0.24
AT1G50020	26.24	25.76	25.56	24.03	32.24	28.49	26.79	18.51
AT4G20440	39.67	33.87	33.43	36.65	27.3	28.06	35.58	33.77
AT4G02482	0	1.17	1.41	0.37	2.78	3.93	1.47	1.42
AT3G13600	9.55	8.38	12.25	13.98	8.62	8.1	20.72	16.49
AT3G31051	0	0	0	0	0	0	0	0
AT4G32050	6.33	4.31	4.02	5.67	4.26	4.47	4.58	5.23
AT3G48523	0	0	0	0	0	0	0	0
AT2G38660	9.98	10.28	11.83	14.75	6.59	11.48	10.96	10.39
AT4G00690	0.4	0.88	0.99	0.44	0.33	0.15	0.52	0.86
AT4G07944	0	0	0	0	0	0	0	0
AT1G53265	0	0	0	0	0	0	0	0
AT5G32505	0	0	0	0	0	0	0	0
AT5G27230	0.35	0.31	0.38	0.39	0.25	0.35	0.22	0.26
AT1G17270	5.51	6.08	6.24	6.73	6.54	6.22	6.46	7.32
AT4G17920	0	0	0	0	0.21	0	0	0
AT1G74350	1.72	0.91	0.61	0.85	0.65	0.7	0.99	0.75
AT1G75230	12.53	11.21	9.43	9.61	10.31	10.79	9	9.83
AT2G07766	0	0	0	0	0	0	0	0
AT1G17140	35.85	37.02	45.31	47.99	38.35	42.52	28.45	34.47
AT5G11020	11.98	12.52	10.02	8.53	7.75	7.69	6.58	6.16
AT1G43560	18.46	19.05	17.28	31.53	19.69	18.59	15.91	25.8
AT5G26030	34.12	27.36	35.77	35.54	31.04	28.11	28.12	27.91
AT4G24900	8.51	10.01	9.04	6.78	7.34	9.48	6.15	6.48
AT4G03190	67.28	66.11	71.17	72.16	67.7	73.65	67.33	72.6
AT3G29769	0	0	0	0	0	0	0	0
AT1G07700	11.38	16.07	9.98	13.51	9.38	13.71	6.67	7.02
AT1G33750	5.77	5.34	4.02	4.35	3.72	5.31	5.7	8.27
AT3G51880	102.45	137.84	122.47	111.86	136.56	150.09	85.05	100.85
AT1G14750	1.69	1.06	3.17	6.19	2.25	2.4	3.85	3.94
AT5G62760	9.89	9.74	13.39	10.94	13.42	14.88	7.25	9.43
AT3G18035	62.6	68.91	51.04	53.03	48.32	52.07	35.48	49.49
AT1G05900	15.62	14.08	12.95	13.98	12.03	10.67	8.63	10.19
AT2G16505	0	0	0.3	0	0	0	0	0.13
AT5G02190	9.79	10.03	16.53	14.71	12.3	12.69	10.13	14.67
AT1G44120	0	0	0	0.02	0	0	0	0.03
AT2G41082	0	0	0	0	0	0	0	0
AT4G21320	3.82	3.36	2.97	3.31	3.81	6.46	4.2	3.43
AT5G42957	0	0	0	0	0	0	0	0
AT5G48510	0	0	0	0	0	0	0	0.21
AT4G06738	0	0	0	0	0	0	0	0
AT5G55560	4.61	4.34	2.69	1.09	3.03	3.04	2.94	1.73
AT3G33066	0	0	0	0	0	0	0	0
AT4G02300	0	0	0.09	0.07	0	0	0	0.04
AT2G25330	0	0	0.33	0	0.08	0.07	0	0.12
AT1G47595	0	0	0	0	0	0	0	0
ATCG01250	0.18	2.09	1.44	0.82	0.44	1.37	0.26	0.11
AT5G63190	98.66	98.69	74.42	68.44	87.32	100.99	61.06	57.76
AT2G21140	1609.05	1482.07	1580.06	1372.83	1381.52	1419.46	543.8	497.24
AT4G00530	6.81	11.31	7.53	11.68	8.23	10.08	19.8	13.58
AT2G01300	8.08	7.4	3.11	2.6	2.41	3.49	3.75	2.9
AT1G01710	23.73	25.08	28.57	28.47	30.79	29.81	23.73	25.2
AT4G15460	0.58	0	0	0	0	0	0	0.18
AT5G38120	0	0	0	0	0	0	0	0
AT5G11475	0	0	0	0	0	0	0	0
AT1G44000	23.4	29.6	16.9	20.07	16.44	18.4	13.87	15.9
AT1G73960	11.23	11.82	12.37	10.94	11.28	10.94	8	9.72
AT1G11360	46.84	49.58	42.53	41.03	47.53	50.69	47.45	51.2
AT3G10845	0	0	0	0	0	0	0	0
AT2G33400	1.9	2.02	4.77	6.36	2.61	2.25	7.71	12.21
AT5G35413	0	0	0	0	0	0	0	0
AT1G04490	2.12	1.49	2.68	2.65	2.92	2.81	4.06	3.33
AT1G15310	5.7	7.7	9.25	7.49	8.68	9.63	8.11	9.39
AT1G13300	39.86	43.32	42.38	31.49	34.23	34.72	23.66	21.93
AT3G12010	12.66	9.59	10.96	12.88	11.45	10.84	10.54	11.81
AT5G56745	0	0	0	0	0	0	0	0
AT3G56390	0	0	0	0	0	0	0	0
AT3G19660	27.72	29.32	20.41	17.8	25.77	26.65	28.3	18.53
AT4G01595	0	0	0	0.16	0.24	0	0.11	0.45
AT2G37362	2.54	2.16	1.74	2.24	2.55	2.38	2.59	2.31
AT2G02180	67.36	64.04	55.29	56.91	60.95	66.87	52.36	45.09
AT1G42705	0	0	0	0.05	0	0	0	0
AT1G32120	8.01	6.82	6.36	5.9	5.4	7.55	3.92	4.78
AT2G39570	61.71	53.13	33.42	34.16	60.58	70.76	19.73	18.39
AT1G31480	9.99	8.35	11.54	7.76	7.54	10.22	7.96	7.68
AT1G21150	1.37	1.2	1.65	3.84	1.03	3.44	1.38	1.86
AT1G78110	14.75	14.69	13.87	14.05	18.9	17.49	13.08	17.72
AT1G80080	4.78	8.29	9.95	11.84	5.57	4.55	10.4	12.64
AT2G47470	147.78	143.64	194.7	217.6	160.8	162.73	300.05	350.14
AT2G45110	0	0	0	0	0	0	0	0
AT3G58710	46.13	45.99	38.91	29.58	47.16	39.05	26.54	24.78
AT5G57350	9.25	12.49	10.92	11.15	7.52	9.75	6.62	13.88
AT5G49240	0	0	0	0	0	0.36	0	0
AT1G77980	0	0	0	0	0	0	0	0.05
AT2G39770	143.51	138.36	155.96	159.13	140.9	140.73	147.08	143.97
AT3G58810	6.93	9.26	7.2	5.27	9.61	11.48	2.75	3.17
AT4G35520	0.56	0.27	0.65	0.95	0.64	0.64	0.4	0.55
AT2G24180	49.43	50.51	36.83	26.97	37.37	34.99	21.38	24.75
AT4G10790	36.92	41.75	40.23	40.42	40.12	42.52	38.09	41.44
AT2G06985	0	0	0	0	1.31	0	0	1.86
AT3G28330	0	0	0	0	0	0	0	0
AT1G34170	0	0	0	0	0	0	0	0
AT4G08112	0.19	0	0.04	0.1	0.05	0	0	0
AT3G24440	8.47	10.39	7.7	8.79	7.58	7.87	9.04	11.32
AT3G27500	2.16	2.28	2.21	1.67	1.08	0.83	0.35	0.27
AT1G36290	0	0	0	0	0	0	0	0
AT5G03260	49.12	38.13	46.48	41.35	36.54	33.04	12.47	14.4
AT2G03620	10.25	11.76	11.36	9.57	11.61	12.01	8.95	8.16
AT5G47180	63.77	60.16	71.88	70.34	64.83	58.49	51.47	48.72
AT2G09900	0	0	0	0	0	0	0	0
AT5G44000	14.17	13.63	12.15	12.44	11.49	12.44	7.37	7.62
AT5G08020	5.54	3.92	6.64	7.72	3.55	4.1	11.59	14.02
AT5G64570	541.17	502.42	305.16	261.84	488.12	456.39	104.73	112.28
AT1G43722	0	0	0	0	0	0	0	0
AT4G36250	117.57	111.29	147.79	167.07	118.56	115.18	171.93	203.02
AT5G42797	0	0	0	0	0	0	0	0
AT3G23171	0	0	0	0	0	0	0	0
AT5G14060	22.19	18.1	18.56	22.08	17.52	18.03	26.47	27.73
AT5G11480	38.23	46.78	42.21	59	36.21	33.62	33.75	45.33
AT4G07942	0	0	0	0	0	0	0.02	0
AT2G27930	17.87	15.7	22.42	19.45	13.56	12.9	20.8	10.2
AT1G49020	0	0	0	0	0	0	0	0
AT3G15010	20.52	23.45	20.07	23.65	17.45	20.5	14.07	19.53
AT5G05270	8.33	10.16	9.46	9.21	6.57	4.1	22.34	23.89
AT2G03230	0	0	0	0.31	0	0	0	0.17
AT2G10790	0	0	0	0	0	0	0	0
AT2G01540	32.41	31.53	26.4	22.24	24.4	23.57	40.69	28.87
AT1G48870	0.22	0.49	0.31	0.24	0.28	1.07	0.37	0.62
AT3G50840	8.4	9.88	11.87	10.11	10.93	7.9	4.33	3.06
AT4G35100	4012.91	3349.19	3575.59	3417.07	3836.93	3935.22	3008.02	2384.25
AT1G34044	0	0.34	0	0.22	0.66	0.58	0.44	0.12
AT2G34204	0	0	0	0	0	0	0	0
AT1G36950	0	0	0	0	0	0	0	0
AT4G09090	0	0	0	0	0	0	0	0
AT3G58795	0	0.27	0.22	0	1.05	0.69	0.23	0.1
AT1G12430	5.71	5.48	6.36	6.24	4.14	4.87	5.12	5.91
AT3G17440	78.07	87.26	82.55	85.87	85.25	91.11	78.61	65.59
AT1G56320	12.17	14.92	5.91	3	8.04	4.97	2.02	2.76
AT1G50880	0	0	0	0	0	0	0	0
AT1G27671	0	0	0	0	0	0	0	0
AT3G46086	0	0	0	0	0	0	0	0
AT1G44830	19.53	13.9	12.99	20.84	9.08	11.69	8.98	12.31
AT4G16180	33.93	34.39	33.38	33.53	29.54	34.11	22.56	28.99
AT4G15396	0.51	0.56	1.36	1.47	2.34	1.04	3.28	4.03
AT5G45190	26.34	31.58	27.75	26.64	25.98	32.55	20.59	23.39
AT5G41120	6.67	5.94	6.97	9.52	8.59	8.75	7.1	7.08
AT1G01300	116.98	93.53	124.49	132.19	118.45	119.35	125.28	171.17
AT2G43790	80.68	71.02	75.69	76.55	79.56	81.86	59	61.84
AT5G32431	0	0	0	0	0	0	0	0
AT5G66820	7.45	9.49	12.43	10.1	12.15	9.36	12.13	10.6
AT1G44840	0	0	0	0	0	0	0	0
AT3G01080	0.16	0.28	0.68	0.35	0.4	0.36	0.42	0.3
AT1G40076	0	0	0	0	0	0	0	0
AT1G36925	0	0	0	0	0	0	0	0.57
AT1G30670	0	0	0	0	0	0	0	0
AT1G22180	37.67	31.72	38.97	32.65	41.97	45.28	29.6	23.46
AT3G60190	31.55	25.85	20.5	22.41	26.96	20.56	13.57	16.74
AT3G20075	0	0	0	0	0	0	0	0.27
AT1G17450	4.77	4.56	4.91	5.4	4.44	5.47	3.47	4.6
AT5G37445	0	0	0	0	0	0	0	0
AT1G61630	0	0	0	0	0	0	0	0
AT5G18260	9.04	10.92	8.22	8.71	8.03	8.02	3.84	4.54
AT5G38450	0.32	0.47	0.98	1.23	0.27	0.71	0.95	0.89
AT2G33793	1.15	0.63	2.25	2.78	0.72	1.7	2.9	3.52
AT5G19380	10.86	10.26	16.66	18.12	15.19	14.91	11.33	15.76
AT1G79670	20.54	18.43	19.1	17.8	20.65	21.95	13.72	12.82
AT4G14230	18.32	14.64	17.74	14.38	18.2	16.75	10.9	11.03
AT3G55580	0.46	0.2	0.57	0.13	0.58	0.59	0.09	0.28
AT2G13706	0	0	0	0	0	0	0	0
AT1G68170	0	0	0	0.32	0	0.43	0.22	0.3
AT5G18362	2.62	4.99	2.48	1.2	0.8	0.97	1.62	2.81
AT4G14810	0	0	0	0	0	0	0	0
AT1G42450	0	0	0	0	0	0	0	0
AT4G08980	64.6	60.08	53.73	60.82	54.48	58.48	64.4	60.19
AT2G22390	3.85	1.62	3.56	3.23	3.22	2.72	5.11	4.65
AT3G06962	0	0	0	0	0	0	3.24	1.98
AT2G12740	0	0	0	0	0	0	0	0
AT1G51240	0	0	0	0	0	0	0	0
AT5G05985	0	0	0	0	0	0	0	0
AT5G07070	3.07	3.01	2.35	4.03	2.96	3.32	3.52	3
AT3G42786	0	0	0	0	0	0	0	0
AT1G07130	4.42	3.3	3.77	2.92	2.96	2.94	3.04	3.61
AT4G08590	3.77	2.69	4.18	4.49	3.26	4.52	2.77	4.9
AT2G44080	92.2	90.56	89.67	105.24	68.41	84.85	31.22	29.15
AT2G18400	17.83	16.64	21.01	33.58	19.82	23.98	55.31	58.4
AT5G32215	0	0	0	0	0	0	0	0
AT5G62320	0	0.17	0	0	0	0	0	0
AT1G42110	0	0	0.26	0	0	0	0	0
AT1G04820	1233.13	980.03	1302.57	1437.76	1155.79	1181.17	1217.63	1176.53
AT3G42770	0	0	0	0	0	0	0	0
AT2G39210	32.27	35.65	32.85	28.02	35.89	35.81	27.84	24.74
AT5G23950	11.26	12.76	12.27	6.07	12.35	14.99	1.4	0.69
AT5G45110	19.16	21.97	23.11	21.23	21.8	22.85	11.35	11.71
AT2G47040	0	0	0	0	0	0	0	0
AT4G05583	0	0	0	0	0	0	0	0
AT3G61150	18.21	17.02	17.11	15.55	13.7	13.46	15.82	17.22
AT5G52990	17.57	20.02	26.53	29.93	21.17	24.97	35.95	29.68
AT1G16210	90.51	105.71	98.72	91.88	113.31	106.57	135.6	139.58
AT3G17260	0	0	0	0	0	0	0	0
AT3G42556	0	0	0	0	0	0	0	0
AT3G61980	13.98	17	14.15	12.62	14.18	12.09	17.8	15.93
AT1G34580	0.41	0.63	0.22	0.28	0.6	0.68	0.15	0.13
AT5G13970	11.93	12.38	11.56	10.92	12.98	11.58	16.55	15.73
AT1G02050	3.72	4.36	3.74	3.5	2.46	2.98	2.65	3.3
AT1G66500	6.01	5.37	3.51	3.82	4.13	4.34	1.79	2.19
AT3G44444	0	0	0	0	0	0	0	0
AT4G09110	0	1.86	1	0.65	2.36	2.08	0.17	0.07
AT3G15115	29.01	31.7	37.01	34.82	38.35	31.52	49.08	39.82
AT5G24530	54.19	48	44.08	38.88	48.93	46.75	25.17	23.33
AT4G06578	0	0	0	0	0	0	0	0
AT1G04030	10.78	7.97	9.09	9.05	9.55	9.7	4.14	6.28
ATMG01275	0	1.38	1.12	0	1.78	2.74	0	0.17
AT5G26590	0	0	0	0	0	0	0	0
AT3G18210	15	13.8	17.33	17.48	16.18	16.35	15.98	20.18
AT5G01230	5.97	5.13	8.09	7.4	8.58	7.04	7.56	11.03
AT5G63080	7.96	9.18	9.88	9.45	11.44	11.4	8.25	7.42
AT2G33920	0	0	0	0	0	0	0	0
AT3G05720	0	0	0.45	0.07	0	0.19	0.33	0.54
AT2G21090	3.41	2.16	3.76	3.98	3.25	2.8	5.02	6.19
AT1G68860	0	0	0	0	0	0	0	0
AT4G30500	18.41	14.62	22.56	20.94	15.4	19.1	30.02	24.23
AT5G48070	7.94	7.14	2.2	3.76	4.01	3.55	5.91	6.61
AT3G23850	0	0	0	0	0	0	0	0
AT1G18880	30.09	31.43	30.66	28.6	33.03	32.75	11.6	12.76
AT1G50740	26.44	20.77	25.47	19.75	19.7	22.41	18.71	18.67
AT5G58780	4.98	4.02	5.71	2.95	4	3.4	3.92	2.72
AT2G05642	0	0	0	0	0	0	0.27	0.06
AT3G31350	0	0	0	0	0	0	0	0
AT3G11430	15.58	16.82	6.36	3.42	4.68	4.21	1.44	1.01
AT3G42500	0	0	0	0	0	0	0	0
AT2G26695	8.73	16.26	17.1	16.15	7.3	10.06	10.11	11.91
AT3G33097	0	0	0	0	0	0	0	0
AT5G03540	76.42	63.73	63.71	67.78	58.9	64.33	54.91	58.65
AT1G58220	10.21	11.03	8.17	8.36	8	8.37	5.51	6.81
AT4G10520	0	0	0	0	0	0	0	0
AT3G04290	62.16	58.88	88.19	133.72	56.7	54.28	158.43	194.17
AT1G42160	0	0	0	0	0	0	0	0
AT1G07350	52.85	57.28	47.33	42.2	44.49	57.16	29.26	36.93
AT5G63960	4.33	4.11	4.92	5.68	3.8	3.73	4.63	6.86
AT2G16005	220.77	118.79	147.28	61.72	227.61	205.73	125.84	84.02
AT5G08040	75.45	84.59	109.32	137.4	117.22	107.57	173.51	189.22
AT4G20340	6.2	6.59	5.69	8.83	7.57	6.59	7.8	9.11
AT4G39340	0.72	3.79	2.04	0.79	0.6	1.06	0.26	1.31
AT2G29790	0	0	0	0	0	0	0	0
AT4G17050	47.89	44.11	51.43	49.05	47.22	48	34.64	39.69
ATMG00480	0.26	2.08	3.91	0.44	2.64	2.53	1.17	0.48
AT4G23635	0	0	0	0	0	0	0	0
AT3G51860	29.52	28.27	20.26	18.43	26.52	21.9	18.8	15.2
AT5G65609	10.18	2.98	4.82	1.87	2.84	5.02	1.19	1.92
AT2G07734	0	0	0.62	0	0.43	1.61	0.49	0.14
AT5G02320	2.34	2.34	3.34	2.4	2.47	2.48	2.8	3.25
AT4G09840	1.94	3.52	4.15	2.21	4.64	4.1	2.06	3.51
AT5G66400	61.55	73.35	139.68	51.75	156.29	176.46	316.81	343.52
AT5G11425	0	0	0	0	0	0	0	0
AT4G17190	30.53	30.74	42.17	47.23	33.17	35.86	60.18	64.52
AT4G34100	60.11	55.11	49.09	47.68	58.27	55.09	30.64	35.05
AT2G28730	0	0	0	0	0	0	0	0
AT5G48090	0.28	0.36	0.93	0.87	0.52	0.72	0.49	0.82
AT1G60180	0	0	0	0	0	0.18	0	0
ATMG00320	0.72	0.63	0	0	0	0	0	0.22
AT5G58010	19.77	20.27	26.9	25.52	23.08	19.79	43.53	33.87
AT1G36800	0	0	0	0	0	0	0	0
AT5G37475	54.68	43.13	52.36	57.45	43.47	47.25	67.77	55.99
AT3G27700	9.5	7.79	9.28	8.35	9.95	7.91	7.08	9.01
AT1G52140	24.53	22.83	17.41	15.23	21.93	19.91	6.44	6.9
AT1G18550	4.74	5.34	5.2	5.73	3.06	4.92	5.43	6.08
AT4G08460	47.93	55.98	46.5	45.4	45.21	53.46	43.4	57.32
AT5G41240	10.2	8.35	9.52	9.75	14.69	10.39	6.86	6.93
AT2G37790	6.85	4.97	8.63	8.96	7.12	5.82	9.57	13.23
AT1G15950	115.97	131.15	113.01	108.64	127.44	124.83	74.89	84.88
AT5G43670	9.97	9.41	9.9	10.61	10.7	9.46	9.22	11.23
AT3G23260	1.91	3.19	2.17	1.47	2.4	2.96	1.56	0.94
AT3G04997	0	0	0	0	0	0	0	0
ATMG01120	3.82	2.24	2.71	2.8	4.26	1.88	3.71	0
AT3G42716	0	0	0	0	0	0	0	0
AT5G08350	6.51	6.95	8.58	8.97	8.56	9.97	8.91	9.9
AT3G31365	0	0	0	0	0	0	0	0
AT5G49070	0	0	0	0	0	0	0	0.05
AT4G21730	26.35	20.74	30.43	27.29	23.03	25	18.23	14.97
AT3G43860	0	0	0.07	0.05	0	0	0	0
AT5G24560	0	0	0	0	0	0	0	0
AT4G24230	35.03	39.41	21.71	16.16	51.92	56.23	8.69	6.73
AT5G22310	28.21	32.58	35.04	36.11	29.75	32.25	26.34	29.35
AT2G03932	0	0	0	0	0	0	0	0
AT1G28510	13.39	15.52	22.76	26.72	16.81	18.75	29.84	30.38
AT2G34160	42.29	38.44	34.69	42.4	35.3	33.09	62.77	45.87
AT1G48240	42.06	37.54	38.66	42.38	40.78	42.84	50.05	43.53
AT5G58390	0	0	0	0	0	0	0	0
AT5G37320	0	0	0	0	0	0	0	0.04
AT5G33355	3.34	0	0	8.88	9.7	6.02	0	2.6
AT1G43940	0	0	0	0	0	0	0	0
AT5G43600	53.61	50.18	44.38	38.98	53.36	45.39	34.82	31.58
AT3G48195	13.84	12.88	11.92	11.58	13.75	12.24	9.62	10.1
AT2G29040	0	0	0	0	0	0	0	0
AT1G43290	0	0	0	0	0	0	0	0
AT2G05810	14.25	12.12	11.85	13.5	10.42	8.9	6.7	10.43
AT3G29265	0	0	0	0	0	0	0	0
AT2G30750	0.35	0	0.58	0.26	0.59	1.65	0.13	0.11
AT2G37010	0	0	0	0	0	0.04	0	0
AT5G32426	0	0	0	0	0	0	0	0
AT5G31212	0	0	0	0	0	0	0	0
AT5G43610	0	0	0	0	0	0	0	0
AT1G43060	0	0	0	0	0	0	0	0
AT3G23590	14.75	14.33	15.84	14.82	15	13.65	9.86	11.47
AT4G07338	0	0	0	0	0	0	0	0
AT2G24340	0	0	0	0	0	0	0	0
AT1G63370	1.15	0.94	0.89	1.43	1.63	1.2	1.66	1.37
AT1G56110	40.35	32.12	40.84	57.82	36.72	40.99	74.66	114.74
AT2G28880	2.91	3.38	3.83	4.1	3.01	3.12	3.29	3.81
AT4G05510	0	0	0	0	0	0	0	0.03
AT2G21490	2.07	2.05	19.69	10.42	22.77	14.56	63.9	80.92
AT4G01320	57.98	54.33	60.66	66.46	62.26	62.99	61.24	73.37
AT1G19010	5.71	6.3	5.09	5.12	7.37	7.57	6.38	6.39
AT1G70230	32.44	37.26	33.95	35.7	36.4	27.52	33.08	24.59
AT1G52830	52.09	54.54	75.82	71.95	56.72	56.31	48.28	42.92
AT3G42181	0	0	0	0	0	0	0	0
AT4G03437	0	0	0	0	0	0	0	0
AT1G23160	1.25	0.9	0.49	0.63	0.95	2.36	0.72	0.92
AT1G67510	15.34	10.94	14.28	12.42	12.83	12.21	6.8	12.21
AT5G64490	0	1.11	0.45	0.93	0.7	0.93	0.78	0.52
AT3G47320	0	0	0	0	0	0	4.51	5.76
AT3G52302	0	0	0	0	0	0	0	0
AT1G67780	3.12	1.26	1.2	2.93	1.41	1.06	4.2	6.03
AT1G67010	0	0	0	0	0	0	0	0
AT3G27720	0	0	0	0	0	0	0	0
AT5G17240	1.69	2.29	1.85	3.44	4.14	2.6	2.28	3.75
AT5G36310	0	0	0	0	0	0	0	0
AT1G76830	0	0	0	0	0	0	0	0
AT4G05440	4.41	7.09	7	7.63	11.45	6.39	11.63	15.9
AT3G50050	8.08	6.54	11.22	14.05	9.12	9.89	9.18	12.77
AT1G04280	57.76	55.59	45.2	39.68	58.97	59.31	22.95	23.09
AT4G26950	0.78	0.34	1.1	0.86	0	0.64	2.04	0.6
AT5G64840	39.12	48.9	28.96	30.02	30.52	34.14	22.83	28.53
AT3G54700	0	0.11	0.09	0.27	0.1	0	0	0.15
AT5G27944	0	0	0	0	0	0	0	0
AT5G37125	0	0	0	0	0	0.06	0	0.03
AT3G24310	6.88	5.6	1.84	2.19	4.67	2.8	1.19	0.61
AT4G04490	0	0	0	0	0.25	0	0	0
AT3G20898	6.17	6.95	4.73	6.39	5.58	3.47	3.4	5.03
AT1G70645	0	0	0	0	0	0	0	0
AT3G24516	0	0	0	0	0	0	0	0
AT2G04510	0	0	0	0	0	0.11	0	0
AT2G03937	0	0	0	0	0	0	0	0
AT4G26400	28.73	41.36	43.03	31.35	49.05	55.93	33.8	30.07
AT2G15760	0.97	1.27	1.48	2.22	0.81	0.95	2.88	1.79
ATCG01020	18.32	16.11	8.67	6.73	45.99	4.52	0	1.61
AT5G53905	0	0	0	0	0	0	0	0
AT4G27170	0.66	0.58	9.77	4.51	24.95	7.51	12.9	13.21
AT3G22430	5.85	6.69	6.03	5.21	7.35	6.78	5.79	5.86
AT3G17060	0	0	0	0	0	0	0	0
AT5G48595	0	0	0	0	0	0	0	0
AT5G39645	0	0	0	0	0	0	0	0
AT5G46530	21.35	15.32	16.17	12.93	14.88	21.83	6.74	7.55
AT3G55750	150.76	130.2	217.03	311.75	177.2	189.96	437.49	677.43
AT4G26810	3.55	3.99	5.54	3.75	3.6	4.51	7.1	8.27
AT5G57785	104.05	87.27	33.34	35.18	72.06	79.64	32.4	27.09
AT1G28306	0	0	0	0	0	0	0	0
AT2G27775	10.05	6.28	8.25	16.4	10.06	6.24	25.41	35.93
AT3G60860	24.44	20.84	25.47	26.94	26.72	25.16	16.68	21.47
AT3G47348	0	0	0	0	0	0	0	0
AT1G57660	131.78	134.8	141.11	231.3	150.42	160.25	362.26	429.13
AT4G04692	103.48	141.3	70.04	63.86	80.86	90.14	43.64	41.36
AT1G19086	0	0	0	0	0	0	0	0
AT1G05870	78.64	83.52	100.11	101.45	89.32	77.66	78.5	68.42
AT5G35495	0	0	0	0	0	0	0	0
AT2G24410	0	0	0	0	0	0	0	0
AT1G07540	0	0	0.15	0.06	0	0.08	0.15	0.03
AT2G36740	10.69	10.74	13.46	13.67	16.39	12.7	17.55	18.9
AT5G20410	9	8.4	9.66	10.1	9.84	9.25	3.03	3.4
AT3G14550	2.18	1.64	1.66	3.17	2.73	2.07	2.14	4.37
AT1G78820	22.19	19.81	27.34	27.8	20.42	20.65	12.43	17.71
AT2G10540	0	0	0	0	0	0	0	0
AT5G37570	0.6	0.53	0.43	1.19	0.8	1.07	1.3	1.08
AT4G14455	24.49	24.58	31.17	29.88	30.73	29.72	43.42	33.2
AT2G35020	24.45	27.27	26.49	34.67	21.27	26.84	28.61	36.51
AT3G03852	0	0	0	0	0	0	0	0
AT3G03080	0	0	0	0	0	0	0	0.06
AT3G46620	24.24	23.85	24.48	24.1	26.91	29.44	27.99	25.45
AT4G07370	0	0	0	0	0	0	0	0
AT5G56760	102.25	102.05	91	82.33	101.34	94.71	71.17	72.87
AT3G49570	2.02	3.99	9.32	8.62	4.22	5.22	10.65	12.67
AT2G31670	91.29	95.6	103.73	114.24	79.19	95.74	88.5	98.26
AT5G07690	0	0	0	0	0	0.09	0	0
AT3G62770	49.01	43.79	40.06	31.54	45.61	42.35	23.77	19.68
AT5G66631	0.3	0.26	0.28	0.43	0.17	0.15	0.63	1.31
AT3G05270	20.65	15.56	15.6	17.54	18.55	17.87	22.19	21.12
AT1G02220	5.99	5.4	6.27	4.95	3.26	3.98	8.48	6.71
AT1G74420	2.67	3.06	4.46	4.46	2.62	2.38	3.15	3.78
AT1G68700	0.81	0.18	0	0.56	0.51	0.3	0	0.25
AT3G57760	1.73	2.92	1.64	1.67	2.35	2.49	1.24	1.1
AT1G64820	0	0	0.28	0.22	0.11	0.1	0.05	0
AT4G33280	0.39	0.35	0.28	0.11	0	0	0.07	0.24
AT2G06880	0	0	0	0	0	0	0	0
AT5G65800	29.98	33.45	31.56	29.45	32.36	25.57	26.2	28.85
AT5G41670	124.18	98.51	121.74	137.4	103.03	98.25	107.02	149.37
AT1G56680	4.33	2	4.21	3.64	4.96	5.05	6.53	7.1
AT5G07760	0.53	0.46	1.71	1.53	0.63	0.67	1.35	2.33
AT5G32600	0	0	0	0	0	0	0	0
AT2G01037	0	0	0.02	0	0	0	0	0.01
AT1G34700	0	0	0	0	0	0	0	0
AT5G58190	11.55	9.3	10.32	13.21	10.04	10.08	8.36	13.91
AT4G28760	21.53	26.66	22.3	21.92	19.71	22.14	14.48	18.79
AT1G30330	47.68	39.55	40.31	46.03	37.14	38.09	32.75	46
AT1G77200	13.61	10.63	19.75	15.65	11.89	16.09	23.03	29.88
AT5G66030	57.41	56.76	48.4	50.59	50.96	56.81	40.3	51.56
AT1G75280	49.6	50.81	56.01	47.89	50.92	47.73	28.38	34.09
AT5G23395	13.66	10.71	9.7	13.31	8.79	11.81	19.01	17.9
AT3G23810	184.04	161.53	194.75	274.75	119.99	134.92	272.72	295.03
AT5G57720	0	0	0	0	0	0	0	0
AT5G49100	20.48	18.24	24.38	28.06	20.49	22.13	26.3	32.39
AT1G55680	80.17	84.93	80.7	74.96	85.56	81.9	43.79	54.19
AT3G26290	2.45	2.59	3.49	2.5	5.85	5.08	1.88	1.25
AT1G34000	43.24	49.59	26.58	35.73	33.08	40.19	12.16	11.29
AT1G04410	1121.49	1006.4	1085.64	1161.4	1066.23	1077.43	1380.15	1217.11
AT5G14011	0	0	0	0	0	0	0	0
AT2G19260	3.47	4.21	4.88	3.65	3.94	3.72	4.98	5.2
AT5G46920	2.77	1.79	3.35	3.09	1.36	3.19	3.22	4.97
AT4G32070	43.12	43.21	46.07	46.17	42.65	43.26	31.21	38.64
AT5G30520	0	0	0	0	0	0	0	0
AT5G28916	0	0	0	0	0	0	0	0
AT3G19490	21.48	20.71	24.64	23.67	23.74	25.11	21.58	26.78
AT2G02220	15.6	14.09	12.46	12.98	15.67	16.38	7.64	8.98
AT1G03570	0	0	0	0	0	0	0	0
AT3G04420	0.31	0.28	0.11	0.52	0	0.13	1.28	0.92
AT3G18050	98.75	95.02	87.16	80.24	71.46	83.27	49.97	56.6
AT5G46440	0	0	0	0.26	0	0.71	0	0.44
AT5G43860	0.92	1.29	1.82	0.61	1.08	2.31	0.68	0.4
AT1G36830	0	0	0	0	0	0	0	0
AT1G28520	20.52	21.26	19.76	20.59	19.55	21.43	13.95	15.43
AT3G51370	101.15	103.41	82.26	72.36	91.33	95.34	67.83	68.18
AT2G22110	0	0	0	0	0	0	0	0
AT3G63052	0	0	0	0	0	0	9.97	1.47
AT3G29633	0	0	0	0	0	0	0	0
AT5G19600	5.13	7.98	3.34	3.06	2.46	2.61	0.97	0.73
AT3G53990	347.24	275.83	344.34	363.86	351.93	323.2	507.02	441.94
AT3G61118	0	0	1.07	0.42	1.26	0.56	0.56	0.23
AT2G42130	13.92	12.57	12.38	25.33	14.95	13.73	21.63	25.02
AT2G22941	0	0	0	0	0	0	0	0
AT4G26980	10.13	8.78	9.9	11.32	9.7	9.66	9.9	10.08
AT3G24890	3.26	3.5	7.2	4.59	5.15	6.16	10.21	11.02
AT4G12500	0	0	0	0	0	0	0	0.17
AT1G52185	0	0	0	0	0	0	0	0
AT3G24070	20.85	18.52	20	16.46	25.62	22.73	13.65	13.49
AT5G29646	0	0	0	0	0	0	0	0
AT1G63245	4.82	5.65	15.98	11.51	10.76	19.01	25.05	15.27
AT1G66180	211.77	192.11	196.36	176.41	153.15	164.87	90.79	102.37
AT2G16940	39.6	45.21	37.17	37.76	43.27	41.27	25.51	33.29
AT1G07790	43.98	41.34	57.67	73.35	50.84	48.54	91.79	114.4
AT2G21030	0	0	0.44	0.17	0	0	1.43	0.81
AT1G07720	151.22	138.11	117.31	104.68	114.09	106.04	70.79	74.99
AT3G20580	0	0	0	0	0	0	0	0
AT3G54680	57.68	50.25	45.3	38.05	42.55	50.19	23.58	25.13
AT5G53040	0	0	0	0	0	0	0	0
AT3G45190	36.21	36.37	34.56	30.87	34.27	36.5	24.28	27.3
AT2G02630	11.32	6.1	8.44	8.85	7.56	7.59	8.41	7.83
AT3G44340	48.1	37.83	47.89	47.87	37.11	41.69	31.62	43.87
AT2G11740	0	0	0	0	0	0	0	0
AT2G14000	0	0	0	0	0	0	0	0
AT1G05060	21.22	16.99	12.08	9.61	13.33	12.58	7.74	7.2
AT1G42220	0	0	0	0	0	0	0	0
AT3G60570	0	0	0	0	0	0	0	0.09
AT3G06540	22.93	21.93	20.68	21.5	21.45	18.66	16.59	18.52
AT1G55960	19.33	15.76	15.34	13.95	16.16	15.9	15.95	12.49
AT1G77700	3.89	4.45	2.9	2.36	3.42	3.31	1.01	1.62
AT1G75510	32.95	36.5	27.08	27.32	39.68	31.82	42.84	36.65
AT3G43340	0	0	0	1.05	0	0	0	0
AT4G28560	0.6	1.32	0.21	1.48	0.38	1.33	0.5	0.79
AT2G47660	0	0	0	0	0	0	0	0
AT4G21930	0.26	1.15	0.37	0	0.88	0	0.1	0
AT1G15240	19.82	17.78	18.59	17.46	17.14	16.68	11.56	15.19
AT1G07980	19.44	16.72	22.96	17.11	17.5	16.52	28.56	28.83
AT1G01740	2.11	1.96	2.17	3.64	1.97	1.74	2.74	2.48
AT2G12010	0	0	0	0	0	0	0	0
AT5G25350	94.82	108.34	79.67	83.81	87.68	94.23	46.93	46.78
AT2G03830	0.67	0.29	0.24	0.18	0	3.21	0.5	1.44
AT3G16670	0	0	0	0	0	0	0	0.09
AT3G29050	0	0	0	0	0	0	0	0
AT1G62914	5.21	4.32	4.76	4.95	4.77	4.3	4.66	3.65
AT5G28000	0	0	0	0	0	0	0.37	1.07
AT1G53090	4.15	3.24	3.25	2.96	3.41	5.13	1.58	1.26
AT2G17064	0	0	0	0	0	0	0	0
AT1G74448	0	0	0	0	0	0	0	0
AT2G01990	3.77	3.93	2.01	1.95	3.15	3.13	0.88	1.16
AT3G17380	3.66	5.92	4.24	3.5	5.47	4.98	1.36	2.32
AT4G09770	4.86	2.99	4.51	2.7	6.41	4.05	3.09	3.32
AT5G23600	0.36	1.89	0.26	0.2	1.2	0.53	0	0.22
AT1G52827	81.64	63.79	32.84	60.46	36.42	39.57	80.29	44.47
AT4G02870	0	0	0	0	0	0	0	0
AT3G20810	14.15	20.38	18.27	14.78	20.41	22.1	10.12	10.64
AT1G47690	0	0	0	0	0	0	0	0
AT1G49590	21.49	23.21	21.49	19.79	19.28	18.72	20.52	22.2
AT1G78420	28.09	31.14	29.06	27.07	36.52	33.9	18.14	20.77
AT5G15350	401.55	334.39	378.44	421.66	319.27	342.15	454.87	501.13
AT1G32970	0.09	0	0.06	0.05	0	0	0.2	0.14
AT1G36035	0	0	0	0	0	0	0	0
AT4G29770	0.18	0	0.88	0.2	0.15	0	0	0.17
AT5G41850	5.74	9.49	5.05	6.07	4.23	3.56	2.9	5.17
AT3G07440	4.38	4.95	7.76	9.07	6.63	7.86	7.91	15.44
AT5G49250	0	0	0	0	0	0	0	0
AT5G55750	0	0	0.6	0.46	1.41	0	1.87	2.97
AT4G08200	0	0	0	0	0	0	0	0
AT5G27310	0	0	0	0	0	0	0	0
AT4G04955	42.35	46.11	29.81	34.06	32.2	27.01	26.32	23.48
AT2G27380	6.97	2.99	13.24	6.55	7.53	4.14	37.21	37.05
AT3G47580	0.29	0.15	0.04	0.22	0.14	0.13	0.04	0.05
AT1G57030	0	0	0	0	0	0	0	0
AT3G23640	58.81	49.23	63.22	60.76	64.02	56.97	47.76	55.01
AT5G28190	0	0	0	0	0	0	0	0
AT5G51105	1.76	0.77	0.94	0.49	1.11	0.98	1.31	1.22
AT2G09994	0	0	0	0	0	0	0	0
AT5G26840	0	0	0	0	0	0	0	0
AT2G24030	0.4	0.59	0.09	0.22	0.22	0	0.35	0.54
AT2G21890	0	0	0	0	0	0	0	0
AT3G08870	0	0.08	0	0	0	0	0	0
AT3G52930	516.1	432.22	567.63	633.5	468.2	487.54	773.25	728.75
AT5G06755	1.59	0	0	0	0	0	0.58	0.24
AT4G01516	0	0	0	0	0	0	0	0
AT3G19780	10.26	7.01	9.34	9.36	9.14	9.56	6.95	9.07
AT1G08700	29.3	27.67	18.35	17.9	15.09	14.47	13.6	19.2
AT4G24620	95.54	74.48	72.96	81.84	73.89	71.77	57.64	67.7
AT1G09550	0	0	0	0	0	0	0	0
AT5G36520	0	0	0	0	0	0	0	0
AT2G11140	2.44	2.41	2.09	3.02	2.21	2.93	4.51	4.25
AT5G19690	62.27	53.23	74.08	82.34	62.47	59.71	67.26	99.77
AT1G16370	27.06	26.96	23.7	28.25	24.14	24.48	13.96	11.03
AT5G33533	0	0	0	0	0	0	0	0
AT3G43890	0.79	0.61	0.77	0.82	1.16	0.36	0	0
AT1G11420	0.87	1.34	1.54	1.8	2.27	2.89	2.27	3.53
AT5G60230	4.66	3.38	2.8	3.23	2.1	2.22	2.4	2.71
AT1G61210	16.43	13.27	14.85	14.21	14.67	15.5	8.83	12.71
AT1G65830	0	0	0	0	0	0	0	0
AT3G17450	6.69	8.25	7.64	7.48	7.43	8.19	5	6.24
AT2G15580	24.23	37.94	35.47	33.33	43.4	37.44	22.86	27.15
AT4G38030	0	0	0	0	0	0	0	0
AT5G29036	0	0	0	0	0	0	0	0
AT3G12587	35.99	25.26	38.69	43.21	38.57	37.19	68.14	68.91
AT3G07170	39.36	34.43	49.92	46.69	40.44	40.68	40.34	47.32
AT1G15140	30.8	28.38	29.18	37.36	29.66	30.24	25.01	34.04
AT2G13430	0	0	0	0	0	0	0	0
AT5G28670	0	0	0	0	0	0	0	0
AT5G16336	0	0	0	0	0	0	0	0
AT2G01320	17.41	25.12	14.78	13.31	16.01	19.53	8.2	11.34
AT4G07938	0	0	0	0	0	0	0	0
AT2G37610	0.51	0	0.36	0	1.29	0.76	0	0.63
AT1G32680	0	0	0	0	0	0	0	0
AT3G14470	3.69	4.1	4.05	3.81	5.17	5.07	2.86	3.34
AT1G04550	18.37	18.68	18.74	21.37	18.9	20.19	14.7	18.66
AT1G34545	0	0	0	0	0	0	0	0
AT1G14182	1.16	3.06	0.82	1.92	4.85	0.86	4.66	0.7
AT1G44940	0	0	0	0	0	0	0	0
AT3G12240	3.72	2.45	1.98	1.71	2.77	1.49	1.68	1.77
AT5G52900	10.87	12.23	12.31	12.59	14.85	13.71	7.8	8.06
AT1G27780	0	0	0	0	0	0	0	0
AT1G33055	15.24	7.76	5.81	6.89	9.8	8.66	2.09	2.38
AT1G15450	0	0	0	0	0	0	0	0
AT4G10140	37.27	38.81	35.7	36.88	41.25	36.81	36.77	30.71
AT4G01700	14.67	14.29	37.61	44.74	38.28	19.26	109.17	94.17
AT3G55810	0	0	0	0	0	0	0.05	0
AT4G02120	35.63	31.14	31.47	29.25	31.64	32.48	22.21	19.52
AT1G69400	2.34	1.32	2.26	3.22	2.24	2.97	2.74	3.19
AT5G36270	1.75	3.37	5.95	5	4.38	2.32	25.78	14.7
AT4G23150	0.1	0	0	0	0	0	0	0.03
AT5G10860	636.05	642.37	435.7	385.62	592.78	619.45	324.08	273.29
AT5G07680	45.56	42.71	52.41	36.14	56.36	53.31	24.46	18.89
AT3G27480	0	0.08	0.19	0.35	0	0.26	0.35	0.54
AT1G51920	0	0	0	0	0	0	0	0.5
AT4G40040	683.3	584.29	493.37	497.82	563.33	565.49	530.05	465.74
AT1G56000	12.08	15.66	14.02	13.61	14.67	12.88	9.42	10.93
AT3G13130	0	0	0.37	0.14	0	0	0.48	0.16
AT2G38325	0	0	0	0	0	0	0	0
AT1G42540	6.96	7.5	7.03	8.29	5.57	6.56	5.24	6.28
AT5G65400	8.85	11.38	15.48	15.81	16.79	12.13	11.17	13.52
AT1G08100	0	0	0	0.06	0	0	0.04	0.04
AT3G46650	0.43	0.88	0.2	0.16	0.36	0.21	0	0
AT3G04720	196.97	229.99	145.71	115.75	215.55	158.8	74.2	54.8
AT1G75960	1.39	1.03	1.59	1.94	2.06	3.04	0.68	1.16
AT3G30360	0	0	0	0	0	0	0	0
AT5G53510	0	0	0	0	0	0	0	0
AT2G46662	0	0	0	0	0	0	0	0
AT2G07674	0	0	0.62	0.38	0	0	0.96	0
AT4G19645	1.18	1.97	0.87	0.11	1.54	0.3	0.15	0.19
AT3G18900	0.12	0.31	0.25	0.21	0.48	0.43	0.3	0.39
AT3G23770	0	0	0	0	0	0	0	0
AT2G40380	39.16	34.22	37.49	45.35	34.06	42.51	34.88	37.09
AT3G43540	12.96	18.95	12.16	17.76	11.48	13.87	10.51	11.73
AT1G04630	52.95	53.86	54.3	61.85	52.51	54.32	75.83	76.47
AT4G30060	32.46	30.42	37.76	38.91	28.96	32.81	27.32	30.34
AT3G43270	32.27	31.57	33.4	36.88	25.79	28.5	25.39	38.56
AT3G30767	0	0	0	0	0	0	0	0
AT5G26692	0	0	0	0	0	0	0	0
AT3G11170	73.8	83	63.43	75.34	60.28	66.75	48.92	66.06
AT2G46660	4.45	4.09	2.95	3.68	2.79	2.1	0.94	1.32
AT3G26815	0	0	0	0	0	0	0.78	0
AT2G39720	48.65	41.32	45.9	44.69	44.28	55.1	31.97	29.25
AT5G52000	0.15	0	0	0	0.13	0	0	0.14
AT1G40107	0	0	0	0	0	0	0	0
AT1G68490	48.85	45.34	58.14	55.75	55.08	58.42	29.22	30.76
AT3G15578	0	0	0	0	0	0	0	0
AT4G24500	12.93	10.92	9.64	11.5	11.02	8.98	10.42	12.84
AT1G06040	171.41	172.39	113.4	107.02	130.79	143.97	55.45	51.44
AT3G23190	30.24	22.41	34.1	33.42	27.45	28.93	32.01	26.67
AT1G42727	0	0	0	0	0	0	0	0
AT1G18970	9.15	6.15	15.86	14.23	21.16	27.85	4.1	2.98
AT5G62848	0	0	0	0	0	0	0	0
AT5G52830	9.13	7.21	9.89	8.78	8.42	9.72	6.98	6.46
AT5G11110	32.15	25.56	26.76	15.88	19.7	16.47	34.12	34
AT4G08596	0	0	0	0	0	0	0	0
AT1G72430	168.36	156.63	141.1	143.28	218.29	203.6	101.25	80.06
AT3G01690	253.08	262.13	205.45	184.05	294.11	320.57	95.5	84.23
AT3G43723	0	0	0	0	0	0	0	0
AT2G47844	0	0	0	0	0	0	0	0
AT1G28250	42.56	31.81	44.8	39.06	44.31	53.29	51.75	38.6
AT5G49630	27.28	22.56	41.53	47.76	29.58	29.15	26.3	29.16
AT1G66630	0.38	0	0	0	0	0	0	0
AT1G34690	0	0	0	0	0	0	0	0
AT2G25830	15.94	16.28	18.45	27.84	16.7	19.43	23.5	31.62
AT3G44280	37.4	32.87	43.5	37.08	49.57	41.04	31.43	32.95
AT4G01280	16.95	14.43	14.63	15.57	14.58	16.41	14.62	14.83
AT5G38750	0	0	0	1.09	0	0.97	0	0
AT4G06718	0	0	0	0	0	0	0	0.11
AT2G39435	7.07	7.61	7.18	8.45	6.83	9.28	10.55	7.62
AT4G22450	0	0	0	0	0	0	0	0
AT5G54970	28.82	24.2	29.86	47.62	29.86	30.21	55.8	58.71
AT3G60220	17.43	16.94	14.54	12.32	12.4	13.75	5.68	8.33
AT2G03240	34.58	29.71	28.77	29.71	36.86	37.59	23.96	27.74
AT1G14080	9.28	6.33	9.22	7.87	9.61	8.63	8.43	8.99
AT1G44542	2.25	1.62	1.02	1.69	1.54	0.91	0.46	0.19
AT1G45246	0	0	0	0	0	0	0	0
ATMG00420	0	0	0	0	0	0	0	0
AT1G49550	0	0	0	0	0	0	0	0
AT1G47240	16.15	13.74	17.04	17.84	15.82	15.94	14.45	16.36
AT2G04378	76.82	76.94	52.91	51.32	54.08	51.71	28.84	33.26
AT2G07560	0	0	0	0	0	0	0	0
AT5G46930	0	0	0	0	0	0	0	0
AT2G28140	3.11	1.75	2.2	2.57	0.37	1.8	5.45	4.45
AT3G17150	0	0	0	0	0	0	0	0
AT3G58290	0	0	0	0.19	0	0	0	0
AT5G64380	7.99	8.33	8.27	10.89	4.76	8.21	3.53	5.28
AT5G37480	31.03	35.97	38.97	39.34	40.95	37.97	48.63	36.68
AT1G21370	22.04	22.7	25.72	25.5	25.37	23.11	23.91	22.52
AT3G62180	0	0	0	0	0	0	0	0
AT4G37450	211.88	158.05	187.78	227.02	159.06	155.09	148.71	156.39
AT3G18620	7.89	7.75	7.57	8.52	9.78	10.08	9.1	6.76
AT2G07030	0	0	0	0	0	0	0	0
AT1G60870	23.32	30.01	25.57	31.08	26.84	25.22	20.22	24.67
AT3G03560	16.25	14.86	20.44	20.25	21.53	18.87	27.86	24.07
AT1G69870	3.42	4.93	4.85	3.42	7.3	4.31	6.51	7.07
AT2G02080	22.22	26.85	17.07	17.97	19.3	19.51	12.55	16.07
AT5G04290	4.29	4.99	5.59	4.3	5.22	5.41	2.63	6.72
AT4G31780	19.81	25.68	19.16	23.65	20.09	24.35	12.4	18.79
AT4G37225	1.6	2.46	1.7	1.98	2.34	0.89	2.23	1.47
AT2G39910	5.29	7.15	5.39	5.75	3.51	3.81	4.24	5.91
AT3G15358	4.89	4.56	6.5	4.21	6.9	8.13	4.31	3.48
AT3G30812	0	0	0	0	0	0	0	0
AT3G09310	1.38	2.66	2.93	5.3	1.84	4.88	4.6	4.83
AT2G07784	0	0	0	0	0	0	0	0
AT5G56320	18.77	22.79	21.92	21.78	21.6	26.87	12.52	22.04
AT5G35792	0	0	0	0	0	0	0	0
AT2G35620	28.85	28.12	36.15	38.03	32.79	30.06	24.7	27.94
AT5G06790	0.78	0.51	0.55	1.28	1.14	0	0.51	0.72
AT4G04985	0	0	0	0	0	0	0	0
AT1G26740	14.12	7.5	21.72	32.4	24.08	15.98	34.32	39.94
AT5G41180	7.12	5.83	7.91	8.66	7.53	8.23	8.46	8.42
AT4G39560	8.57	7.1	8.72	7.1	7.19	7.85	4.61	6.24
AT3G13760	3.7	2.11	3.34	4.08	5.7	5.18	3.21	2.91
AT2G16670	0	0	0.03	0	0	0	0	0
AT1G11500	1.72	2.27	2.14	2.13	0.36	0.95	0.64	0.26
AT1G75040	0	0	0	0	0	0	0	0
AT5G66390	323.62	296.52	277.63	230.45	353.34	301.96	153.84	132.09
AT2G17190	61.3	64.29	64.91	68.13	67.88	57.6	52.65	60.7
AT3G11680	0	0	0	0	0	0	0	0
AT2G15400	1.15	1.15	1.72	1.99	1.24	1.94	2.58	2.68
AT1G15510	0.82	1.3	1.05	2.33	1.55	0.38	1.96	2.96
AT1G07040	32.84	37.69	32.95	25.03	36.66	38.53	21.42	20.45
AT1G71170	11.4	8.54	11.39	10.47	10.95	12.59	10.54	13.1
AT1G63470	13.11	9.41	13.19	14.44	10.99	10.02	11.41	15.36
AT1G13640	37.81	54.6	44.01	39.54	47.11	56.03	40.42	40.03
AT3G03626	0	0	0	0	0	0	0	0
AT1G35516	92.92	91.64	76.22	60.99	85.81	99.52	51.19	40.25
AT3G52610	14.4	14.18	15.41	17.9	14.74	14.31	13.09	15.89
AT5G57330	73.6	72.73	90.31	93.4	74.96	77.38	112.13	111.2
AT4G16210	45.91	38.62	64.64	79.11	60.01	56.52	129.18	128.3
AT3G48720	0.95	2.2	0.93	1.18	1.5	1.06	0.13	0.78
AT3G42260	0	0	0	0	0	0	0	0
AT1G22210	0	0	0	0	0	0	0	0
AT2G05171	0	0	0	0	0	0	0	0
AT2G11623	0	0	0	0	0	0	0	0
AT5G38220	15.83	15.71	16.83	18.67	16.82	17.83	12.58	15.19
AT1G33230	44.11	41.6	35.38	42.21	31.76	32.26	33.37	38.5
AT4G16650	31.48	24.63	26.49	26.69	24.43	27.83	24.44	32.52
AT5G28920	1.38	1.31	0.83	1.64	1.6	1.57	1.27	1.45
AT1G13850	0	0	0	0	0	0	0	0
AT5G46870	4.56	4.45	6.83	7.07	5.37	6.49	12.77	11.12
AT3G18660	7.05	6.19	6.46	6.39	5.07	4.28	2.66	3.12
AT1G79340	259.7	262.97	310.09	304.83	308.25	322.19	291.15	319.12
AT3G62499	3.11	0	0.73	0	0.87	0	2.28	0
AT2G31141	1.68	6.22	10.19	7.42	5.92	2.74	47.65	8.18
AT1G57680	121.62	114.61	127.27	121.13	115.01	136.87	104.27	98.18
AT1G55110	14.9	15.43	12.74	14.26	13.94	14.06	9.6	12.54
AT3G58100	9.04	10.46	11.49	14.43	8.16	6.69	14.7	16.07
AT4G10115	0	0	0	0	0	0	0	0
AT5G10200	15.65	13.56	16.45	19.88	15.15	14.58	17.58	21.16
AT3G29570	0.21	0	0.61	0.47	0.54	1.27	0	0.33
AT4G05020	23.04	23.07	29.71	27.43	24.73	24.68	37.37	38.45
AT1G64550	35.86	38.7	35.93	41.53	37.22	34.05	32.71	42.5
AT5G41265	0	0	0	0	0	0	0	0
AT3G49100	30.34	30.99	41.51	39.51	41.84	38.18	72.05	81.77
AT1G79270	67.2	65.64	59.51	46.7	56.63	55.75	41.28	41.41
AT3G28770	0	0	0	0	0	0.04	0	0
AT3G17320	0	0	0	0	0	0	0	0
AT5G37370	47.24	59.64	43.69	44.61	44.82	50.13	26.57	33.49
AT1G65610	22.59	17.84	23.52	18.1	18.06	14.87	15.39	19.97
AT1G64380	12.44	15.77	5.88	6.06	13.9	15.58	4.54	4.13
AT5G24915	0	0	0	0	0.11	0.07	0	0
AT3G61280	0	0	0.07	0.11	0	0	0.15	0.18
AT2G34440	0	0	0	0	0	0	0	0.09
AT1G55040	1.59	0.79	1.56	1.64	1.27	1.38	3.12	3.27
AT1G35630	0	0	0	0	0	0	0	0
AT3G44115	0	0	0	0	0	0	0	0
AT1G53860	1.54	0.98	1.98	3.46	1.29	1.45	2.55	3.29
AT3G10460	0.36	0	0	0	0	0	0	0
AT3G29525	0	0	0	0	0	0	0	0
AT1G71010	34.07	30.08	34.9	34.43	33.61	34.37	24.5	31.44
AT5G24313	8.24	7.25	17.82	16.51	11.91	5.82	35.18	30.97
AT5G37220	0	0	0	0	0	0	0	0
AT2G06080	0	0	0	0	0	0	0	0
AT5G63460	38.63	31.68	29.28	34.93	33.02	29.9	22.23	24.4
AT4G26790	1.95	2.38	2.88	2.15	2.89	1.33	4.31	2.69
AT4G09540	0	0	0	0	0	0	0	0
ATMG00060	0	4.29	4.41	3.42	5.2	2.95	1.64	0.41
AT5G52150	0	0	0	0	0	0	0	0
AT5G37880	0	0	0	0	0	0	0	0
AT2G23347	0	0	0	0	0	0	0	0
AT2G14878	320.89	344.35	204.79	174.5	292.23	318.89	157.48	150.36
AT1G44920	20.86	27.33	19.17	27.8	20.56	21.46	16.43	18.12
AT3G18070	1.21	0.65	1.7	1.45	1.06	2.31	1.01	1.93
AT1G26945	188.82	215.42	208.91	254.56	219.51	248.18	172.89	163.97
AT1G67870	32.06	42.43	31.29	37.22	26.66	35.95	8.55	19.02
AT1G62850	10.97	10.04	11.07	13.35	8.55	9.7	10.35	12.65
AT5G38365	0	0	0	0	0	0	0	0
AT1G15820	328.82	446.2	122.57	185.75	182.95	243.48	33.41	42.46
AT1G72690	16	20.88	18.58	18.96	17.84	19.71	29.26	25.83
AT2G07756	0	0	0	0	0	0	0	0
AT3G45577	0	0	0	0	0	0	0	0
AT3G24800	25.36	24.09	32.19	31.37	30.11	34.26	26.41	25.79
AT4G22400	0	0	0	0	0	0	0	0
AT3G22810	3.21	4.94	8.36	9.29	4.7	6.13	5.84	7.12
AT4G01970	2.1	1.4	2.34	1.68	2.55	1.05	3.61	3.04
AT1G26090	7.85	7.68	9.17	7.71	7.67	9.37	6.98	7.51
AT4G39140	46.18	34.5	32.63	30.86	45.51	37.46	27.18	24.5
AT4G28280	0	0.31	0.25	0.19	0.88	3.1	1.17	0.97
AT4G14050	0.1	0.46	1.04	1.04	0.35	0.7	1.29	1.04
AT3G18960	15.31	18.17	22.29	21.37	14.95	17.36	21.92	24.14
AT5G20460	0	0	0	0	0	0	0	0
AT3G31720	0	0	0	0	0	0	0	0
AT4G07498	0	0	0	0	0	0	0	0
AT1G52460	0	0	0	0	0	0	0	0
AT3G29636	0	0	0	0	0	0	0	0
AT3G12810	4.28	4.1	4.82	4.55	3.88	3.9	4.48	6.39
AT5G50715	0	0	0	0	0	0	0	0
AT2G42500	97.74	91.47	109.15	111.51	104.94	111.61	116.44	118.91
AT5G66840	0.84	0.63	0.68	1.19	1	0.8	2.19	1.71
AT3G27080	43.26	41.09	41.39	46.62	41.81	33.77	92.8	97.03
AT5G49400	13.25	19.77	15.97	17.59	22.01	24.95	27.63	29.76
AT4G17695	33.25	36.36	43.09	39.18	31.37	35.72	34.55	36.17
AT3G02100	0	0	0	0	0	0	0	0
AT4G15415	18.29	17.27	20.74	18.58	18.43	18.64	15.76	15.64
AT4G11653	0	0	0	0	0	0	0	0
AT2G11190	0	0	0	0	0	0	0	0
AT5G59720	1.92	0.84	1.82	4.07	1.88	1.42	7.5	7.4
ATMG00160	1.4	3.1	4.12	1.54	1.41	4.54	2.79	1.04
AT3G25585	81.47	72.2	79.64	75.96	82.58	78.47	61.11	59.17
AT1G67670	0	0	0	0	0	0	0	0
AT5G55330	0	0.18	0	0	0	0	0.07	0
AT4G14750	41.33	44.47	42.68	40.53	32.82	35.66	39.2	33.31
AT1G11410	14.68	14.06	15.77	14.33	16.53	15.89	4.84	5.11
AT3G57260	0	0	0	0	0	0	0	0
AT5G07730	5.45	5.34	6.39	7.84	2.8	6.35	6.16	5.43
ATCG00290	0	0	0	0	0	0	0	0
AT4G20530	0	0	0	0	0	0	0	0
AT1G80050	28.77	24.15	18.77	24.7	31	29.12	14.26	13.1
AT1G40077	0	0	0	0	0	0	0	0
AT4G18197	12.82	9.36	11.87	12.98	19.82	16.44	1.91	2.24
AT2G06470	0	0.03	0	0	0	0	0	0
AT4G34330	0	0	0	0	0	0	0	0
AT3G26250	0	0	0	0.08	0	0	0.72	0.76
AT3G42473	0	0	0	0	0	0	0	0
AT2G46308	0	0	0	0	0	0	0	0
AT5G55740	2.48	2.32	2.2	3.71	2.85	2.92	2.75	3.72
AT1G50830	0	0	0.26	0.12	0.24	0.37	0.3	0.4
AT5G23380	23.35	26.76	19.53	14.71	21.88	26.24	11.69	12.46
AT4G36520	15.06	13.93	13.89	13.76	18.8	17.93	8.65	11.63
AT1G74205	0.47	0	0.5	0.26	0	0	0	0.36
AT1G02410	16.63	17.38	23	20.12	21.81	21.74	27.51	25.58
AT2G45161	0	0	0	0	0	0	0	0
AT5G33433	0	0	0	0	0	0	0	0
AT4G32540	0.3	0.13	0.11	0.17	0.13	0.11	0.17	0.33
AT3G06778	7.07	5.21	4.37	3.52	2.29	4.72	0.68	2.04
AT3G29791	0	0	0	0	0	0	0	0
AT4G32212	0	0	0.32	0.39	0	0.38	0.1	0.56
AT2G36970	0	0	0.64	0.21	0.11	0.76	1.05	1.23
AT5G03740	44.48	45.44	47.81	56.68	46.55	51.25	64.77	72.86
AT5G07280	2.48	3.02	6.69	6.31	6.49	6.31	3.73	3.88
AT1G17460	1.34	2.6	1.91	2.42	1.8	2.52	1.34	2.25
AT2G37630	43.31	57.98	42.82	52.06	37.28	41.3	43.31	53.84
AT1G22380	0.12	0	0.71	0.89	0.21	0.64	0.14	0.15
AT5G36850	0	0	0	0	0	0	0	0
AT5G48465	0	0	0	0	0	0	0	0
AT1G61300	0.07	0.19	0.47	0.16	0.61	0.11	0.08	0.1
AT1G15840	0	0	0.16	0.25	0	0	0	0
AT5G65440	18.45	17.41	18.56	22.62	17.14	18.86	15.38	19.94
AT5G14970	25.15	28.08	27.37	29.78	29.01	26.35	19.47	19.74
AT2G03180	0	0	0	0	0	0	0	0
AT3G45755	0	0	0	0	0	0	0.09	0
AT2G36485	13.64	10.18	12.97	11.34	9.9	10.84	11.1	12.14
AT1G18850	2.9	2.41	4.61	6.24	3.47	4.59	6.33	8.63
AT3G09630	189.52	170.12	201.62	263.82	175	196.89	329.72	369.9
AT1G13320	47.95	42.8	48.7	51.63	42.76	47.52	41.13	43.2
AT1G15880	54.78	57.61	52.97	43.18	52.8	53.77	24.34	30.29
AT2G29410	0.63	0.69	0.56	0.87	0.92	0.58	0.59	0.19
AT1G65310	865.49	835.6	1553.33	1649.36	1060.11	931.11	985.58	792.01
ATCG01060	0	6.88	3.34	1.73	1.31	4.63	7.95	0.47
AT5G43920	5.84	6.55	6.6	6.85	7.58	7.78	5.07	4.71
AT3G15770	36.99	39.48	56.55	57.87	74.71	72.24	41.56	30
AT4G03795	0	0	0	0	0	0	0	0
AT2G41590	0	0	0	0.13	0.1	0	0	0.07
AT3G25220	70.32	64.02	96.73	113.22	80.97	78.59	226.76	195.94
AT2G34320	0	0	0.17	0.13	0.2	0.36	0.36	0.3
AT5G03650	21.85	22.21	22.66	27.23	21.2	21.03	16.21	23.97
AT4G02390	3.33	2.93	3.77	3.96	2.56	2.26	4.3	6.32
AT1G20010	580.34	561.34	690.57	735.77	572.65	645.93	510.05	583.7
ATCG00910	0	0	0	0	0	0	0	0
AT4G31180	67.04	66.74	62.79	71.69	70.7	75.98	70.67	79.46
AT5G44740	2.87	3.36	1.73	2.25	1.82	1.54	2.28	1.92
AT4G36920	26.4	21.18	28.12	24.96	25.53	28.8	21.13	19.98
AT5G30673	0	0	0	0	0	0	0	0
AT4G06550	0	0	0	0	0	0	0	0
AT1G64563	0.79	0.69	0.28	0.25	0.44	0.44	0.17	0.08
AT1G54350	14.44	19.26	20.26	21.92	21.42	21.72	10.12	12.69
AT5G64820	0	0	0	0.33	0	0	0.88	0.18
AT5G50010	4.88	5.37	5.42	5.29	5.24	5.48	3	3.59
AT2G16832	0	0	0	0	0	0	0	0
AT1G28002	0	0	0	0	0	0	0	0
AT2G33160	0	0	0.07	0.11	0	0	0	0
AT2G21470	22.76	22.39	24.77	23.91	27.66	25.81	21.65	23.92
AT4G18900	0	0	0	0	0.37	0.65	0	0
AT1G37471	0	0	0	0	0	0	0	0
AT3G16260	10.64	11.18	11.21	13.19	9.66	10.18	8.94	12.09
AT2G24710	0.57	0.63	1.17	0.87	1.32	1.16	0.11	0.04
AT1G30190	0	0	0.18	0	0	0	0.19	0.08
AT1G14550	0.88	0.58	0.62	0.48	0.55	0.81	0.24	0.81
AT5G45469	0	0	0	0	0	0	0	0
AT4G30074	0	0	0	0	0	0	0	0
AT1G46120	0	0	0	0	0	0	0	0
AT4G16935	0	0	0	0	0	0	0	0
AT3G55610	108.33	126.44	100.85	89.71	122.49	125.71	57.17	54.96
AT2G30945	6.63	5.53	4.57	6.97	10.84	7.88	4.75	3.15
AT2G25600	0	0.06	0	0	0	0	0.12	0.31
AT1G16830	0.43	0.37	0.53	1.17	0.98	0.55	1.27	1.45
AT1G44090	0.71	0.78	1.52	1.47	1.19	0.66	5.9	4.13
AT3G58460	52.35	44.77	49.35	49.22	50.39	55.15	46.35	48.5
AT5G56220	10.35	10.89	11.46	10.99	9.79	9.02	9.15	12.57
AT3G13435	56.51	33.35	46.99	46.24	63.44	59.41	50.79	45.56
AT1G10880	0	0	0	0	0	0	0	0.06
AT2G46520	14.54	11.8	15.82	17	12.31	14.46	12.65	16.34
AT2G07470	0	0	0	0	0	0	0	0
AT1G52530	1.52	0.59	1.08	1.58	0.85	1	0.44	1.3
AT1G58889	1.86	0.69	0.85	0.75	0.41	0.7	0.48	0.23
AT2G44581	0	0	0	0	0	0	0.22	0.54
AT3G12850	0	0	0	0	0	0	0	0
AT4G17370	11.5	17.59	12.3	13.08	16.74	15.65	6.51	5.13
AT4G37670	1	0.79	0.57	2.21	1.25	1.09	1.26	2.25
AT1G63580	0.53	0.93	0.56	0.73	2.43	1.76	0.29	0.33
AT4G01100	97.57	75.89	98.16	102.25	93.47	96.28	120.76	128.78
AT4G34630	23.12	21.39	28.68	28.55	25.85	29.14	38.56	34.22
AT2G24530	3.24	3.13	2.45	3.51	2.08	3.91	2.86	3.84
AT3G33109	0	0	0	0	0	0	0	0
AT3G12977	26.59	19	14.36	11.36	19.3	19.79	7.46	6.86
AT4G27010	0.77	0.42	1.01	0.96	0.84	0.83	1.27	1.73
AT1G62720	0.12	0.22	0.61	0.54	0.31	0	0.23	0.46
AT1G36980	223.7	208.84	151.89	145.4	190.82	202.82	145.75	118.56
AT5G46830	0	0	0	0	0	0	0	0
AT4G13100	27.82	22.98	24.21	23.01	29.28	20.81	23.45	18.49
AT4G09480	3.03	4.18	2.46	3.12	1.57	0.85	0	0
AT3G32905	0	0	0	0	0	0	0	0
AT4G09730	9.79	13.46	10.55	16.54	8.19	7.77	15.55	23.8
AT3G10390	8.71	7.91	8.22	9.47	9.77	9.97	7.01	9.8
AT5G50260	1.69	1.48	0.46	0.29	0.54	0.48	0	0.08
AT4G03726	0	0	0	0	0	0	0	0
AT1G71520	0.81	0.36	0.29	0.67	0.34	1.5	0	0.25
AT3G26820	0	0	0	0	0	0	0	0.03
AT3G19550	0	0	0	0.18	0	0	0.25	0.31
AT1G34792	0	0	0	0	0	0	0	0
AT3G50460	0.75	0.66	0	0.21	0.31	0.28	0	0
AT2G33460	0.76	2.68	3.06	1.54	1.49	2.63	3.68	4.93
AT1G41723	0	0	0	0	0	0	0	0
AT3G44590	25.89	32.1	34.74	53.57	36.53	40.22	73.71	74.68
AT3G26486	0	0	0	0	0	0	0	0
AT1G35190	44.02	35.92	38.26	33.31	48.21	52.55	37.66	28.05
AT1G07850	0	0	0	0	0	0.09	0	0.08
AT5G26015	0	0	0	0	0	0	0	0
AT1G09620	34.75	32.65	32.57	35.86	29.07	30.52	22.67	32.5
AT4G06658	0	0	0	0	0	0	0	0
AT3G27840	0	0	0	0	0	0	0	0
AT1G02570	4.25	4.56	5.69	3.9	2.56	2.79	7.72	11.27
AT1G58561	0.08	0.07	0	0.11	0.17	0.09	0	0.01
AT1G26790	0.86	0.45	0.86	0.38	0.58	0.77	0.13	0.48
AT5G36903	0	0	0	0	0	0	0	0
AT5G01080	0	0	0	0	0	0	0	0
AT1G01350	21.34	22.81	24.05	26.21	23.76	27.82	19.77	24.12
AT3G32310	0	0	0	0	0	0	0	0
AT2G44730	32.37	37.49	31.16	27.43	32.35	35.58	20.4	26.47
AT1G65770	0	0	0	0	0	0	0	0
AT1G21395	0	0	0	0	0	0	0	0
AT4G29450	1.04	0.98	1.27	0.53	0.81	0.44	1.11	1.06
ATCG00270	3.34	11.74	5.86	1.51	6.08	10.45	2.71	1.03
AT5G56780	4.96	7.15	5.68	5.39	8.82	7.33	4.93	6.57
AT5G32402	0	0	0	0	0	0	0	0
AT3G17230	0	0	0	0	0	0	0	0
AT1G26558	0	0.12	0.37	0	0	0	0.38	0
AT4G01490	0.49	0.69	1.73	1.38	1.25	0.96	0.36	0.66
AT3G14860	23.98	27.24	26.8	22.58	23.11	25.57	17.41	22.03
AT1G12880	13.43	17.71	16.69	16.88	17.21	18.09	7.97	7.51
AT5G48060	1.83	1.3	2.18	1.62	2.07	2.4	1.01	1.37
AT4G11860	19.69	19.64	19.54	18.78	16.4	18.65	15.09	18.19
AT2G36960	9.07	6.86	8.49	8.71	8.43	8.75	6.53	7.04
AT5G44345	0	0	0	0	0	0	0	0
AT3G43572	0	0	0	0	0	0	0	0
AT5G05300	0	0	0	0	0	0	0	0
AT4G39680	65.16	69.03	58.63	62.27	58.01	68.88	39.88	48.94
AT2G23860	0	0	0	0	0	0	0	0
AT5G66460	21.76	22.05	28.13	27.57	21.01	18.28	19.59	23.18
AT5G20790	3.28	2.39	7.72	10.01	3.87	2.72	44.25	41.46
AT1G08035	0	0	0.87	0.22	0.34	0	0.15	0.13
AT5G53100	0	0	0	0	0	0	0	0
AT1G04985	23.33	28.71	24.93	27.56	29.31	30.26	22.34	23.63
AT4G28181	0	0	0	0	0	0	0	0
AT4G05100	39.07	38.03	26.24	15.35	29.6	28.62	19.12	17.81
AT4G01190	1.4	1.05	3.02	3.94	1.71	3.02	1.08	1.52
AT2G24200	168.22	164.37	193.64	199.32	165.41	180.91	207.66	230.01
AT2G05790	89.92	83.82	107.02	107.99	81.83	93.63	71.77	93.59
AT5G65180	7.13	9.44	7.43	7.92	7.52	8.02	8.42	6.33
AT3G13120	203.98	174.25	191.98	286.38	181.51	184.73	208.62	228.9
AT3G55005	37.59	45.97	47.06	61.01	51.36	47.66	48.02	52.79
AT5G43850	80.7	79.05	69.42	69.14	69.14	65.25	75.09	68.44
AT3G47250	2.28	4.08	0.4	0.44	0.75	1.36	1.41	1.05
AT3G59750	0.84	1.47	1.56	0.69	1.05	1.24	0.62	1.46
AT5G20950	55.75	58.13	92.99	104.66	70.45	72.94	117.69	163.94
AT2G41231	0	0	0	0.49	0	0	0	0.54
AT5G48760	53.02	46.61	50.38	73.23	46.31	51.49	85.83	112.79
AT3G01720	42.23	36.88	54.64	54.04	49.32	48.22	51.58	60.83
AT3G42723	0	0	0	0	0	0	0	0
AT3G07850	0	0	0	0	0	0	0	0
AT5G37630	3.47	3.2	3.76	4.56	4.57	2.61	5.23	6.65
AT1G66190	6.39	7.46	8.33	7.24	8.61	8.81	6.39	7.86
AT4G32880	14.92	13.91	12.18	11.65	11.93	10.57	6.4	9.36
AT3G11420	39.83	40.37	34.17	28.94	32.5	32.05	19.74	24.2
AT4G39800	49.6	44.14	43.56	47.31	42	52.69	26.13	34.1
AT3G13030	14.47	10.71	15.9	16.57	17.86	15.81	13.69	12.47
AT3G14410	30.42	28.89	23.77	27.5	30.84	28.61	24.44	19.42
AT3G24615	0	0	0	0	0	0	0	47.14
AT3G42255	0	0	0	0	0	0	0	0
AT3G21880	0.38	0	0.13	0	0	0	0	0
AT1G44318	0.5	0.29	0.24	0.37	0.7	0.99	0.63	0.41
AT5G20885	89.76	77.06	82.19	77.01	77.96	76.09	51.85	59.51
AT5G41770	27.97	23.74	27.9	31.76	24.19	23.15	28.75	39.74
AT4G37430	1.44	1.48	3.9	2.04	1.77	1.49	3.64	4.61
AT2G11430	0	0	0	0	0	0	0	0
AT3G04470	36.12	34.76	39.16	41.5	32.45	35.96	33.66	37.53
AT2G15210	0	0	0	0	0	0	0	0
AT2G13960	1.87	1.42	1.77	1.48	0.8	4.51	0	0.72
AT4G35519	0	0	0	0	0	0	0	0
AT5G08500	26.91	24.93	20.96	19.62	20.73	21.9	11.52	12.02
AT4G05918	0	0	0	0	0	0	0	0
AT3G60810	11.61	11.76	23.12	25.97	25.34	24.63	17.84	21.94
AT5G19560	3.29	1.93	4.52	3.5	1.74	1.38	6.46	6.14
AT3G16800	58.16	48.47	46.8	34.26	46.02	47.19	23.37	22.06
AT1G05350	26.18	28.01	29.53	34.1	25.79	28.67	37.12	43.15
AT3G50665	0	0	0	0	0	0	0	0
AT5G27630	2.68	2.51	2.46	3	1.59	1.85	3.87	4.02
AT3G42890	0	0	0	0	0	0	0	0
AT3G20541	0	0	0	0	0	0	0	0
AT1G19930	0	0	0	0	0	0	0	0
AT3G58930	4.04	3.74	0.93	0.84	0.18	0.73	1.18	1.28
AT1G62520	7.58	5.82	5.5	6.77	5.06	5.59	7.32	10.45
AT2G31470	0.18	0	0.13	0	0	0	0	0.05
AT4G19040	19.98	19.97	22.19	20.74	22.06	23.94	15.86	16.62
AT1G23170	4.38	4.07	5.61	6.02	4.6	5.97	6.5	9.12
AT5G02800	25.58	22.93	23.28	17.37	24.67	23.65	13.11	12.79
AT2G42530	0	0	0	0	0.29	0	0	0
AT1G17145	17.57	19.93	18.71	14.91	22.76	19.91	5.7	8.11
AT5G05250	5.72	5.98	7.65	8.12	8.65	11.55	3.27	6.24
AT5G35076	0	0	0	0	0	0	0	0
AT4G22310	183.87	157.98	223.81	219.21	204.65	204.77	330.37	281.52
AT1G35745	0	0	0	0	0	0	0	0
AT1G52050	7.76	4.91	4.99	11.03	15.24	12.27	6.38	7.13
AT4G03440	2.58	1.89	2.69	2.89	2.88	1.85	1.03	2.19
AT5G54370	75.47	60.85	47.45	62.94	72.36	52.38	60.11	56.79
AT5G03010	0.67	0.19	0.16	0.61	0.56	0.82	0.41	0.21
AT3G14950	0.09	0.16	0.26	0.3	0.08	0	0.64	0.14
AT1G56730	0	0	0	0	0	0	0	0
AT3G23250	0.15	0.13	0.21	0.17	0.63	0.78	0.22	0.09
AT2G11773	0	0	0	0	0	0	0	0
AT1G48280	5.54	6.55	6.22	6.33	7.33	5.58	5.75	5.36
AT5G01595	8.82	8.55	4.82	6.23	5.3	3.68	4.46	5.51
AT5G13050	24.21	24.4	19.02	21.48	20.6	19.81	17.52	19.82
AT2G34180	0.4	0.35	0.09	0.44	0.44	0.2	0.35	0.49
AT4G04800	53.56	51.63	48.17	54.2	52.89	50.66	43.15	39.64
AT3G44035	0	0	0	0	0	0	0	0
AT4G32520	18.64	20.46	20.24	24.71	15.37	19.47	22.24	31.7
AT3G03060	2.69	3.05	4.43	6.3	2.76	3.46	7.21	11.38
AT2G05400	1.71	3.3	0.62	0.6	1.34	0.68	0.34	0.25
AT1G44641	0	0	0	0	0	0	0	0
AT1G78800	25.88	21.06	23.65	23.66	22.34	23	24.32	22.84
ATCG00700	0	0	0	0	0	0	0	0
AT2G42975	7.61	5.35	3.67	5.37	4.84	3.15	5.09	4.12
AT5G38705	0	0	0	0	0	0	0	0
AT1G63400	0.83	3.01	2.71	2.32	3.86	1.91	1.53	1.99
AT4G06714	0	0	0	0	0	0	0	0
AT1G71830	9.23	6.93	10.44	11.45	8.23	8.38	12.1	13.77
AT3G30803	0	0	0	0	0	0	0	0
AT2G38750	254.85	214.39	411.8	388.79	319.82	307.24	725.52	647.07
AT4G35820	0	0	0	0	0	0	0	0
AT4G05634	0	0	0	0	0	0	0	0
AT2G37570	29.39	33.32	30.23	26.88	27.65	30.29	22.95	24.83
AT4G38530	1.63	1.91	1.54	1.44	0.91	1.53	0.53	1.11
AT2G28180	0	0	0	0	0	0	0	0.05
AT1G11330	1.07	0.63	0.14	0.37	0	0.1	0.15	0.15
AT4G38230	25.43	23.98	27.93	25.7	23.74	27.3	24.64	28.86
AT1G77600	6.27	4.78	7.19	7.11	5.99	4.79	5.23	6.86
AT1G22860	11.59	10.46	11.42	11.27	11.38	11.34	7.59	10.83
AT3G22190	24.28	22.69	18.73	19.8	23.02	19.88	18.24	18.73
AT1G35250	7.9	9.83	14.95	9.42	12.93	9.48	11	6.48
AT3G30180	55.3	45.64	42.68	46.3	61.83	54.51	38.4	45.44
AT4G28397	0	0	0	0	0	0	0	0
AT2G46940	10.38	14.6	8.84	9.44	14.33	9.02	3.67	5.28
AT1G60986	0	0	0	0	0	0	0	0
AT1G52700	2.37	1.46	2.19	1.57	1.39	2.45	2.73	4.02
AT5G51580	0	0	0	0	0	0	0	0
AT4G38710	37.58	37.31	43.05	50.25	41.78	41.49	47.04	61.69
AT5G32519	0	0	0	0	0	0	0	0
AT3G49170	0.96	0.91	0.95	2.36	0.62	0.82	1.57	3.14
AT2G20722	0	0	0	0	0	0	0	0
AT1G58936	0.05	0	0.07	0.05	0.12	0	0.07	0.01
AT1G24320	7.56	8.06	6.13	6.65	7.58	7	5.47	4.24
AT5G34795	0.14	0	0.3	0.31	0.24	0.73	0	0.09
AT4G01250	4.71	4.43	6.21	4.91	7.31	9.07	5.64	5.92
AT1G62422	12.7	12.62	9.68	7.77	6.6	10.26	7.12	6.2
AT5G05970	9.12	8.79	10.35	11.4	9.96	10.72	7.54	10.15
AT3G15930	0.57	0	0.54	0.47	0.95	0.42	0.18	0.41
AT1G53282	0	0	0	0	0	0	0	0
AT1G67890	14.84	12.99	16.09	15.7	16.12	15.35	11.77	13.12
AT3G21210	0.77	0.55	0.49	0.31	0.29	0.36	0.05	0.24
AT5G01210	169.81	183.2	169.37	169.22	154.67	149.39	60.33	65.77
AT5G18110	86.54	88.41	79.41	75.26	102.09	107.84	77.74	76.98
AT1G62410	0	0	0.24	0	0.28	0.5	0.13	0.42
AT1G13530	5.34	3.91	5.06	4.61	5.06	6.45	4.24	5.56
AT1G39830	0	0	0	0	0	0	0	0
AT1G34430	46.47	49.65	47.41	51.99	43.24	48.62	40.57	53.15
AT4G35940	11.67	14.82	10.59	15.01	13.03	11.34	16.51	16.77
AT1G42440	14.88	12.09	12.2	15.46	13.09	11.98	14.98	18.5
AT5G06865	0.44	0.51	0.1	0.16	0.24	0.43	0.33	0.31
AT2G30290	0	0	0	0	0	0	0	0
AT2G26520	0.7	0	0.5	0.26	0.39	1.03	0.09	0.36
AT4G33520	20.35	21.45	19.95	28.74	22.63	17.81	16	23.55
AT1G06570	50.64	69.51	26.66	15.51	50.37	50.57	13.81	13.41
AT1G55310	66.78	67.8	46.3	43.08	57.88	53.96	27.03	30.56
AT3G50660	41.18	33.79	43.77	39.28	53.76	57.94	33.31	29.45
AT3G28070	2.62	4.33	2.52	3.14	2.83	2.86	3.17	2.72
AT1G63740	4.48	3.83	3.76	4.86	4.93	4.7	3.39	4.05
AT1G09870	34.78	32.99	37.32	39.1	35.46	35.83	33.71	38.59
AT4G24220	227.77	223.25	234.28	227.82	244.69	242.05	268.33	246.97
AT2G27870	0	0	0	0	0	0	0	0
AT2G13440	10.33	10.97	10.74	10.3	9.46	10.22	7.86	11.82
AT1G17710	0.19	0.5	0.4	0.73	0.48	0.14	2.94	1.76
AT2G33150	311.59	309.3	427.98	471.54	406.16	360.76	649.1	681.31
AT1G27200	24.04	23.85	20.65	16.34	17.52	18.43	17.15	17.71
AT3G23780	5.63	4.93	7.4	8.12	6.72	7.11	6.12	8.4
AT5G10010	31.68	29.41	37.08	45.33	33.21	38.83	46.32	56.58
AT3G43148	0	0	0	0	0	0	0	0
AT4G40100	0.67	0	0	0	0	0	0	0.1
AT3G60310	2.86	2.51	2.91	2.87	3.49	2.87	2.79	2.75
AT3G02400	4.39	2.97	4.85	3.41	4.7	4.32	3.61	6.02
AT3G53610	94.23	93.27	89.1	101.04	92.49	82.26	91.88	91.34
AT2G17740	0	0	0	0	0	0	0	0
AT1G09410	0.64	0.49	0.46	0.71	0.31	0.54	0.21	0.74
AT5G58590	27	27.5	25.21	35.3	32.09	30.89	49.06	57.01
AT1G10540	0.1	0.35	0.07	0.33	0.08	0.15	0.19	0.28
AT3G50940	0.53	0.35	0.56	0.44	0.33	0.49	0.49	0.78
AT2G33900	0	0	0	0	0	0	0	0
AT3G61172	0	0	0	0	0	0	0	0
AT3G60160	0.25	0.11	0.09	0.09	0.24	0.15	0.08	0.18
AT2G01850	72.48	74.11	62.35	65.6	71.51	60.82	38.45	32.58
AT3G09270	97.8	85.96	117.66	110.23	134.73	117.46	136.77	172.57
AT5G40316	0	0	0	0	0	0	0	0
AT3G45780	271.33	222.35	362.2	424.96	284.86	301.98	357.96	453.15
AT2G15010	0.39	0.68	21.91	7.23	14.52	4.28	97.45	100.82
AT1G09240	0.8	0.29	0.46	0.81	0	0.48	1.16	0.91
AT1G67810	44.76	57.35	62.65	84.66	58.34	53.96	65.55	99.19
AT1G22580	0	0	0	0	0	0	0	0
AT1G56360	0	0	0	0	0	0	0	0
AT3G16840	10.62	9.71	9.85	12.02	10.6	11.62	11.18	15.53
AT4G14500	55.35	59.45	57.94	54.13	60.88	59.01	44.69	48.1
AT3G27680	0	0	0	0	0	0	0	0
AT3G19710	0	0	0.42	2.69	0.12	0.11	7.95	6.37
AT1G18835	21.56	26.53	30.61	34.44	22.54	28.69	26.44	17.85
AT5G17480	0	0	0	0	0	0	0	0
AT3G53920	9.12	12.11	7.51	7.22	9.34	10.62	3.04	4.75
AT4G10890	6.81	5	6.27	7.11	6.26	7.88	8.22	7.2
AT3G29762	0	0	0	0	0	0	0	0
AT1G28440	59.33	57.18	68.39	67.04	68.05	75.05	41.6	52.32
AT1G01650	31.35	31.29	23.49	22.45	29.03	28.3	16.98	19.61
AT4G23493	2.55	2.62	0.6	2.58	2.13	2.83	1.89	1.04
AT1G25025	0.75	0.91	0.2	0.31	0.12	0.1	1.23	0.23
AT2G35859	0.11	0	0.08	0.06	0.09	0.17	0.33	0.35
AT3G50860	17.58	16.96	15.38	17.47	17.54	18.93	18.63	14.22
AT1G72290	10.48	11.61	12.8	12.93	2.63	5.73	2.97	3.36
AT5G64500	75.54	60.19	74.95	73.52	84.01	89.06	49.4	54.18
AT5G06730	2.03	1.53	1.13	1.04	1.46	1.5	1.46	1.48
AT3G03490	23.84	21.5	23.1	21.38	20.29	19.61	36.34	31.67
AT5G53350	78.97	79.52	67.05	64.66	72.8	61.37	50.9	55.43
AT5G23340	27.78	26.5	22.83	19.79	28.6	25.69	16.13	15.99
AT5G19880	0.16	0.14	0	0.09	0.27	0	0	0
AT2G07690	10.29	7.25	10.2	12.5	8.74	8.36	10.05	15.58
AT3G06610	42	37.21	44.49	50.19	41.93	51.83	84.64	73.33
AT1G11400	34.63	41.92	36.93	38.83	40.37	42.73	30.28	37.57
AT4G32475	0	0	0	0	0	0	0	0
AT1G53705	0	0	0	0	0	0	0	0
AT1G43205	0	0	0	0	0	0	0	0
AT4G35110	28.53	27.54	28.21	28.77	34.87	31.63	20.13	21.5
AT3G57800	52.33	51.96	55.15	52.67	53.58	58.94	47.2	47.11
AT1G75560	38.08	41.49	33.58	41.5	37.87	42.14	54.19	51.08
AT5G45480	27.68	24.51	32.59	30.26	31.85	32.75	21.75	23.95
AT5G20990	35.41	33.59	32.86	33.2	32.79	36.41	31.65	32.22
AT2G29270	0	0	0	0.22	0	0	0	0.24
AT3G52190	20.09	16.02	24.94	22.58	25.71	22.13	23.12	22.89
AT2G43570	24.69	17.76	11.15	6.06	9.22	7.39	6.15	5.86
AT3G47090	0.06	0	0	0	0.05	0.14	0.05	0.02
AT5G22990	0	0	0	0	0	0	0	0
AT4G01830	0.26	0.27	0.66	0.48	0.56	0.27	2.25	1.98
AT4G19480	0	0	0	0	0	0	0	0
AT1G16450	0	0	0	0	0	0	0	0
AT2G18150	3.93	4.17	2.56	1.71	4.65	3.27	0	0.25
AT2G29260	0.74	0.65	0.53	1.12	1.24	0.41	0.69	0.97
AT5G06620	1.05	2.78	1.2	1.63	1.76	3.12	1.88	1.89
AT4G37590	24.37	24.73	28.8	31.41	26.41	30.03	23.42	27.77
AT1G01800	74.22	68.95	73.44	76.52	70.37	65.27	112.13	97.11
AT5G52552	15.99	17.32	17.08	15.35	16.13	19.05	16.87	16.36
AT1G30560	0	0.34	0.28	0.58	0.33	0.29	0	0.24
AT4G31630	0.78	0.23	0.46	0.57	0	0.38	0.05	0.08
AT3G62230	0	0	0	0	0	0	0	0.08
AT1G41830	115.75	100.18	133.94	159	92.49	95.64	151.13	211.17
AT2G26580	4.44	4.36	4.83	6.48	3.2	4.05	6.07	6.76
AT1G18191	0	0	0	0	0	0.92	0	0
AT1G08440	0	0	0.09	0	0	0	0	0
AT3G33112	0	0	0	0	0	0	0	0
AT5G34820	0	0	0	0	0	0	0	0
AT2G32415	4.9	3.04	5.53	4.73	4.85	3.64	3.72	5.13
AT5G58250	150.7	139.06	121.38	195.46	105.32	130.17	122.27	154.5
AT5G32161	0	0	0	0	0	0	0	0
AT2G25565	0	0	0	0	0	0	0.14	0
AT1G41798	0	0	0	0	0	0	0	0
AT2G05752	0	0	0	0	0	0	0	0
AT4G24130	60.64	54.01	45.94	24.14	27.56	21.09	37.28	26.17
AT2G07185	0	0	0	0	0	0	0	0
AT5G21970	3.3	1.61	2.4	3.43	2.86	2.35	3.14	3.93
AT3G05630	1.03	0.91	1.35	0.99	1.14	1.12	1.05	1.63
AT1G49520	3.38	3.87	4.42	4.43	4.19	4.93	5.94	4.64
AT1G44608	26.52	25.14	23.96	23.71	24.2	27.68	21.74	21.6
AT3G25099	0	0	0	0	0	0	0	0
AT5G52010	7.6	8.56	9.94	13	7.47	8.77	8.46	15.76
AT2G36710	0.28	0.62	0.9	1.4	0.95	1.26	0.21	1.05
AT5G19310	4.59	4.89	4.56	4.74	5.62	6.29	3.81	5.41
AT4G06508	0	0	0	0	0	0	0	0
AT3G43530	0	0.09	0	0	0	0	0	0
AT2G14661	0	0	0	0	0	0	0	0
AT2G32380	39.01	36.37	48.87	44.6	47.22	39.11	69.19	61.43
AT5G16390	143.06	107.44	112.35	123.57	96.96	92.71	117.01	120.19
AT3G06240	8.59	12.14	11.23	9.98	10	10.47	10.3	9.73
AT4G14620	6.9	7.2	7.13	7.23	7.73	8.24	5.12	5.18
AT5G33025	0	0	0	0	0	0	0	0
AT1G36100	0	0	0	0	0	0	0	0
AT2G23171	0	0	0	0	0	0	0	0
AT5G66950	21.84	18.63	22.04	20.84	21.65	22.64	18.41	19.26
AT3G06930	15.08	9.41	11.96	14.64	7.9	9	12.68	16.7
AT4G03700	0	0	0	0	0	0	0	0
AT2G04790	4.66	11.27	2.9	4.94	1.28	3.12	1.98	1.24
AT3G22460	16.58	12.38	8.86	5.79	14.17	13.7	2.19	3.08
AT1G77080	56.06	65.3	51.91	46.68	59.12	56.26	43.01	37.04
AT5G05090	21.33	19.46	17.55	19.49	15.54	14.76	9.45	9.09
AT3G13229	0	0	0	0	0	0	0	0
AT4G34620	317.59	414.95	295.56	376.18	315.39	358.41	449.19	426.51
AT2G25482	1.09	0.48	0	0.9	0.91	1.21	0.61	0.33
AT5G62480	55.16	62.71	61.9	43.63	59.76	59.61	81.83	61.42
AT1G15610	0.29	0	0.2	0	0	0	0	0
AT5G40545	0	0	0	0	0	0	0	0
AT1G56050	8.82	8.69	10.06	20.47	9.62	11.3	18.58	24.43
AT5G12910	0	0	0	0	0	0	0	0
AT5G14545	0	0	0	0	0	0	0	0
AT2G07695	0	0	0	0	0.31	0	0.15	0.15
AT1G15130	79.78	63.01	63.87	58.54	64.69	67.05	36	36.51
AT5G67260	28.36	31.18	25.09	28.72	23.6	27.81	31.69	28.82
AT1G26220	8.34	9.51	6.36	8.85	8.53	11.19	3.33	4.66
AT5G26260	449.26	397.78	532.17	463.93	500.08	507.99	431.53	516.53
AT2G42960	9.6	10.93	11.03	11.53	7.8	12.09	8.51	13.5
AT5G40150	7.69	3.67	9.62	10.7	6.98	9.25	10.06	12.66
AT4G26170	0.13	0	0	0.44	0.11	0.19	0.25	0.33
AT3G22050	0	0	0	0	0	0	0	0
AT2G29870	0	0	0	0	0	0	0	0
AT5G65710	3.28	3.5	3.97	3.4	3.28	3.7	2.35	3.36
AT1G15670	81.23	74.13	47.81	45.26	82.84	76.57	20.78	20.02
AT5G26283	0	0	0	0	0	0	0	0
AT2G46600	85.28	89.6	96.95	93.13	121.7	126.13	153.16	129.87
AT4G03110	71.9	61.26	75.51	69.08	69.69	76.74	58.48	56.15
ATMG00410	1.29	1.01	4.54	1.11	0.64	1.75	0.86	0.34
AT3G29641	0	0	0	0	0	0	0	0
AT1G56790	0	0	0	0	0	0	0	0
AT3G42798	0	0	0	0	0	0	0	0
AT2G15260	0	0	0	0	0	0	0	0
AT4G10640	1.62	1.42	0.48	0.97	1.24	2.09	0.96	0.88
AT4G29035	0	0	0	0	0	0	0	0
AT2G21080	2.75	4.03	2.04	2.88	1.31	3.19	1.12	1.46
AT3G27310	47.82	44.74	53.16	55.41	54.12	53.52	55.98	53.11
AT5G37175	0	0	0	0	0	0	0	0
AT4G00700	21.96	19.45	15.47	11	17.33	18.53	9.27	8.8
AT2G35615	0	0	0	0	0	0	0	0
AT1G41690	0	0	0	0	0	0	0	0
AT1G18080	247.94	204.24	235.8	316.05	213.41	223.44	357.15	424.47
AT5G53540	24.99	27.13	32.02	38.58	34.12	32.33	38.86	39.83
AT1G66970	1.41	1.11	0.74	0.82	0.31	0.49	0.11	0.35
AT4G28080	34.65	46.82	20.22	20.72	23.79	27.89	11.04	18.47
AT4G19210	69.3	61.4	69.16	76.65	70.45	67.13	59.91	75.5
AT5G60030	12.94	10.74	12.58	16.49	13.45	16.47	22.54	28.21
AT1G47265	0	0	0.28	0	0.33	0	0.44	0
AT1G25280	43.09	41.26	40.35	35.51	41.61	43.55	26.18	24.84
AT1G48000	1.89	2.28	1.34	0.65	3.16	1.22	2.37	1.46
AT2G02390	190.12	155.35	180.24	154.97	213.89	193.65	153.69	115.88
AT3G50510	0	0	0	0	0	0	0	0
AT3G19160	0	0	0	0	0	0	0	0
AT3G18291	0	0	0	0	0	0	0	0
AT3G56060	8.22	5.02	9.78	11.36	9.97	8.51	12.81	11.5
AT1G23210	0.41	0.72	0.58	0.6	1.03	0.2	0.76	0.46
AT1G15090	0	0	0	0	0	0	0	0
AT1G28447	9.79	2.46	3.97	1.16	4.1	1.03	0	1.69
AT1G01060	72.71	87.8	48.43	41.26	57.38	57.25	28.77	25.07
AT2G01780	0	0	0	0	0	0	0	0
AT5G43380	2.88	3.55	4.09	3.17	3.62	3.94	3.17	3.39
AT5G58320	39.14	35.15	46.82	40.34	43.7	41.85	35.05	31.12
AT5G28076	0	0	0	0	0	0	0.17	0.19
AT4G36940	21.4	18.33	27.8	26.66	23.83	26.38	26.18	26.69
AT5G23900	112.33	118.45	106.83	124.92	87.69	109.38	158.8	163.4
AT1G60320	0	0	0	0	0	0	0	0
AT2G07777	0	0	0	0	0.23	0	0	0
AT5G49590	0	0	0	0	0	0	0	0
AT3G23510	32.31	33.46	31.82	22.73	51.73	53.27	10.34	11.26
AT5G42223	0	0	0	0	0	0	0	0
AT5G19090	42.27	41.77	45.59	50.66	40.61	37.34	29.18	40.99
AT2G29320	0.36	0	0.51	0.2	0.6	0.13	0	0.22
AT2G06790	0	0	0	0	0	0	0	0
AT3G30222	0	0	0	0	0	0	0	0
AT4G06694	0	0	0	0	0	0	0	0
AT2G46470	25.97	23.69	25.34	25.76	26.64	29.96	24.27	29.66
AT3G27030	30.49	15.03	19.08	28.6	26.57	23.48	26.62	27.21
AT5G19315	0	0	0	0	0	0	0	0
AT1G71696	13.22	14.87	16.66	15.13	18.01	14.11	13.05	16.46
AT4G36900	34.81	32.22	21.08	20.64	29.8	32.4	11.81	17.95
AT4G26070	12.03	9.56	4.87	4.99	6.56	7.25	2.7	2.15
AT3G13724	0	0	0	0	0	0	0	0
AT4G34135	21.98	19.6	26.06	21.13	25.85	24.82	16.87	11.64
AT3G11673	0	0	0	0	0	0	0	0
AT1G09690	288.04	273.89	346.38	471.75	325.29	335.13	846.56	932.56
AT1G79245	84.2	86.91	76.2	63.1	62.94	75.51	12.46	10.77
AT4G05600	0	0	0	0	0	0	0	0
AT1G03120	2.18	0.77	5.89	5.77	3.28	4.52	10.67	10.03
AT1G31000	0	0	0	0	0	0	0	0
AT1G26665	94.79	123.28	90.18	74.67	121.55	123.25	69.14	63.61
AT5G34881	0	0	0	0	0	0	0	0
AT1G51380	0.83	0.97	0.79	0.61	0.7	0.82	1.19	1.5
AT4G21323	0.72	0.71	0.51	0.49	1.07	0.59	0.15	0.22
AT3G06433	0	0.15	0.08	0.06	0	0	0	0.05
AT2G14470	0	0	0	0	0	0	0	0
AT1G37150	1.13	0.99	1.2	2.49	1.42	0.84	1.32	1.46
AT1G05310	5.49	4.8	5.17	4.43	4.82	4.71	0.73	0.98
AT2G32850	36.3	27.67	35.46	35.68	29.65	31.06	29.65	32.44
AT1G56900	0	0	0	0	0	0	0	0
AT5G33404	0	0	0	0	0	0	0	0
AT3G50022	0	0	0	0	0	0	0	0
AT1G43130	31.39	33.3	27.12	26.32	27.68	29.49	24.89	27.11
AT5G48420	0	0	0	0	0	0	0	0
AT5G06920	0	0	0	0	0	0	0	0
AT1G57440	0	0	0	0	0	0	0	0
AT3G49070	2.94	2.73	3.36	2.97	3.28	2.29	0.97	1.16
AT3G62420	30.65	30.6	37.88	40.61	38.59	39.59	31.01	27.49
AT1G13620	0.37	0	0.26	0.41	0.62	1.09	0.27	1.47
AT3G13000	7.47	10.03	11.67	10.94	9.68	11.41	7.44	7.86
AT1G66200	607	527.21	753.74	721.73	785.31	897.42	704.46	529.68
AT2G18530	0	0	0	0	0	0	0	0
AT2G39060	0	0	0	0	0	0	0	0
AT1G09900	4.61	4.83	4.29	5.39	2.76	2.68	4.75	7.31
AT1G14455	0	1.07	0.29	0.45	0.68	0	0.45	0.25
AT3G48208	0	0	0	0	0	0	0	0
AT2G35310	0.54	1.26	2.93	1.39	1.8	1.73	6.22	5.16
AT3G15950	586.66	540.02	674.09	616.11	726.01	723.8	681.62	760.51
AT1G20440	1948.66	2175.04	1726.42	1437.08	1999	1928.11	1239.4	1129.29
AT3G02160	1.63	1.33	1.41	1.41	1.27	1.9	1.35	1.73
AT3G17203	0	0	0	0	0	0	0	0
AT2G32150	359.14	346.15	208.18	163.94	416.53	386.43	99.96	93.88
AT1G65040	25.27	30.85	32.95	28.13	30.48	33.73	23.56	24.86
AT3G24500	35.84	47.95	32.24	32.77	79.11	84.28	20.33	28.41
AT5G03830	8.74	7.54	8.01	6.5	8.77	11.16	2.55	2.16
AT1G18790	0	0	0	0	0	0	0	0
AT5G46420	30.27	37.08	30.14	43.17	33.08	37.27	34.44	40.51
AT4G03405	0	0	0	0	0	0	0	0
AT1G11990	0	0	0	0	0	0	0.08	0
AT3G05710	25.52	26.07	25.86	30.37	29.01	30.37	27.69	30.64
AT5G64760	11.8	10.57	16.02	18.16	12.29	12.4	25.42	26.48
AT5G46450	1.3	1.44	0.84	1.09	0.76	0.63	0.46	0.61
AT4G12920	0	0	0	0	0	0	0	0
AT3G59010	44.93	52.41	44.7	35.42	50.95	46.01	6.69	7.17
AT5G49510	41.78	32.76	51.89	69.66	60.65	53.33	65.11	81.26
AT1G52620	1.64	2.33	1.44	1.46	1.5	1.38	1.49	1.64
AT5G34853	5.47	6.33	6.3	6.09	5.83	6.31	4.75	6.12
AT3G32455	0	0	0	0	0	0	0	0
AT2G07666	0	0	0	0	0	0	0	0
AT5G67380	89.77	90.88	77.1	72.59	81.97	76.94	53.63	54.97
AT3G14310	224.4	231.08	207.47	187.49	235.33	227.06	85.98	112.24
AT2G22155	0	0	0	0	0	0	0	0
AT5G46877	0	0	0	0	0	0	0	0
AT2G40670	4.66	6.47	3.01	2.32	8.24	10.24	2.94	2.95
AT5G03230	80.02	69.58	51.65	48.5	74.89	73.47	19.54	16.04
AT1G21430	0	0	0	0	0	0	0	0
AT5G40050	0	0	0	0	0	0	0	0
AT3G12480	32.64	28.95	31.18	26.64	28.92	30.71	31.46	30.28
AT2G36440	0	0	0	0	0	0	0	0
AT2G18700	52.66	46.75	27.27	22.7	56.72	59.51	10.34	11.99
AT1G58270	297.11	320.86	398.37	327.3	349.13	339.36	447.91	419.21
AT3G33045	0	0	0	0	0	0	0	0
AT2G13422	0	0	0	0	0	0	0	0
AT4G36830	5.6	3.69	2.13	1.54	5.19	3.84	0.97	0.99
AT1G34410	0	0	0	0	0	0	0	0
AT2G23260	0	0	0	0	0	0	0	0
AT1G01550	206.86	183.6	170.6	174.71	199.71	190.47	139	132.73
AT4G28800	0.61	0.67	0	0.42	0.25	0.22	0.23	0.19
AT5G24410	35.33	29.31	33.87	23.86	31.59	31.6	24.76	20.66
AT3G57450	49.08	46.59	57.58	77.32	69.8	58.31	73.28	61.7
AT2G37520	11.35	11.26	16.32	17.29	17.26	19.82	15.01	15.38
AT1G23100	5.1	4.49	7.9	10.99	3.49	4.12	22.51	29.99
AT5G40660	19.34	21.64	20.93	26.98	23.91	18.28	29.71	38.85
AT1G06810	0	0	0	0	0	0	0	0
AT4G08100	0	0	0	0	0	0	0	0
AT1G03650	2.48	1.94	1.57	1.98	3	1.84	2.87	2.47
AT5G13370	15.6	25.31	13.1	13.86	13.72	14.4	14.43	20.2
AT1G17330	20.02	22.04	24.21	19.75	26.5	26.99	15.88	17.1
AT3G03700	20.32	16.61	15.35	13.47	16.6	15.37	9.43	7.57
AT3G57110	0	0	0	0	0	0	0	0.2
AT3G18570	0	0	1.26	0.65	1.49	0	1.54	2.83
AT5G18470	5.52	5.33	3.92	5.71	3.04	2.09	2.11	2
AT1G16090	1.24	2.45	2.31	1.62	2.6	1.72	1.16	1.06
AT1G40137	0	0	0	0	0	0	0	0
AT2G22920	39.9	34.02	30.97	21.61	35.69	27.65	22.56	19.17
AT4G16141	15.63	19.28	19.16	32.29	22.75	21.73	26.52	33.05
AT4G04394	0	0	0	0	0	0	0	0
AT4G21640	0	0	0	0	0	0	0.31	0.22
AT1G65090	1	0.44	6.38	2.5	8.85	6.39	40.72	42.33
AT1G78520	2.51	0.74	3.56	6.91	4.2	9.9	2.77	4.31
AT2G40081	0	0	0	0	0	0	0	0
AT2G34655	1.88	1.03	1.33	2.33	0.59	1.73	8.99	6.37
AT4G22980	1.37	0.6	1.13	0.82	1.14	1.52	0.26	0.6
AT5G55230	27.64	27.99	31.46	40.22	28.78	28.85	44.04	50.47
AT2G34300	64.95	58.54	76.73	89.96	61.29	68.73	93.7	122.74
AT1G10590	126.77	127.88	126.79	147.56	137.07	139.37	188.73	199.83
AT5G16800	38.87	31.77	32.06	28.83	35.18	41.07	19.76	20.54
AT3G04735	0	0	0	0	0	0	0	0
AT5G55540	6.55	6.26	7.82	8.07	7.67	7.3	6.97	8.89
AT4G06482	0	0	0	0	0	0	0	0
AT3G58540	1.07	0.47	7.97	13.83	7.6	5.92	13.44	11.11
AT2G29065	2.36	2.25	2.94	2.28	2.14	2.11	2.32	2.81
AT4G08145	0	0	0	0	0	0	0	0
AT2G41280	1.55	4.77	3.3	6.61	21.06	18.04	44.84	34.26
AT4G25750	0.11	0.1	0.08	0.25	0.19	0	0.04	0.04
AT1G07250	24.19	26.49	24.96	20.8	27.41	23.52	21.41	22.71
AT4G40042	15.45	22.21	17.45	18.95	22.32	20.69	21.24	27.3
AT1G09575	9.49	14.69	15.13	18.04	15.58	17.51	14.34	15
AT3G42115	0	0	0	0	0	0	0	0
AT3G32300	0	0	0	0	0	0	0	0
AT3G14595	170.76	162.39	123.26	100.57	99.93	113.44	103.08	89.29
AT3G33528	0	0	0	0.16	0	0	0	0
AT3G24216	0	0	0	0	0	0	0	0
AT1G52618	0	0	0	0	0	0	0	0.15
AT1G05610	0.27	0	0.39	0.3	0	0.3	0.05	0.17
AT5G42620	31.63	31.58	30.51	32.71	30.41	30.14	21.59	26.53
AT5G29436	0	0	0	0	0	0	0	0
AT2G24890	0	0	0	0	0	0	0	0
AT5G14565	3.44	4.8	3.79	3.56	2.79	5.01	1.24	2.1
AT3G23460	0.93	0.2	0.49	0.13	0	0.17	0.09	0
AT5G38800	0	0	0	0	0	0	0	0
AT3G24090	4.04	5.66	5.94	5.99	4.43	4.84	6.28	7.83
AT2G02240	0.22	0.19	0.47	0.61	0.55	0.97	0.82	0.68
AT5G46570	16.99	13.79	16.17	20	12.12	14.85	17.59	20.14
AT5G35050	0	0	0	0	0	0	0	0
AT3G60800	22.47	19.08	24.98	26.45	23.85	23.92	21.78	28.44
AT2G23850	0	0	0	0	0	0	0	0
AT4G39060	0	0	0	0	0	0	0	0
AT1G32713	0	0	0	0	0	0	0	0
AT5G13460	30.25	29.39	35.06	35.96	31.79	31.56	37.95	39.6
AT3G30281	0	0	0	0	0	0	0	0
AT2G07120	0	0	0	0	0	0	0	0
AT1G24390	0	0	0	0	0	0	0	0
AT3G12220	1.71	0.63	0.61	0.55	1.31	2.01	0.32	1.02
AT4G23240	1.38	2.08	2.37	1.09	1.65	1.6	3.01	3.04
AT3G04750	6.32	4.6	4.83	5.15	5.37	5.69	3.24	4.92
AT2G07743	0	0	0	0	0	0	0	0
AT3G13682	2.17	1.07	2.16	2.63	1.96	2.24	2.72	2.31
AT1G55440	0.4	0.09	0.43	0.17	0.17	0.07	0.22	0.28
AT5G03406	4.52	5.76	4.65	3.95	5.09	7.03	2.27	4.34
AT2G17290	54.46	48.26	53.14	54.25	55.53	56.2	52.39	46.64
AT3G52850	111.14	117.21	112.57	107.23	106.2	112.4	75.9	96.4
AT3G25230	48.18	43.49	65.29	77.67	65.71	64.81	82.22	114.75
AT3G45095	0.43	0.42	1.05	0.72	0.58	0.42	0.81	0.71
AT1G50480	156.14	170.41	150.25	137.29	160.86	162.22	100.44	113.22
AT1G20540	17.38	19.94	16.56	18.25	19.38	20.93	16.78	18.25
AT3G56170	47.52	57.37	41.68	38.72	45.37	46.29	33.65	29.83
AT1G41630	0	0	0	0	0	0	0	0
AT2G12083	0	0	0	0	0	0	0	0
AT1G23060	29.1	32.42	30.58	27.85	26.79	25.07	20.89	19.76
AT3G20940	14.94	15.45	23.41	16.96	34.79	30.49	34.14	39.39
AT2G15630	0.31	0.55	0.67	0.4	1.05	0.77	0.58	1.07
AT4G38000	0.22	0.19	0.15	0.36	0.36	0	0	0
AT5G11650	30.63	30.16	21.74	18.13	31.6	31.47	12.98	15.33
AT4G06528	0	0	0	0	0	0	0	0
AT3G18235	0	0	0	0	0	0	0	0
AT1G66370	0	0	0	0	0	0	0	0
AT5G66020	0	0.1	0	0	0	0	0	0
AT3G11860	0	0	0	0	0	0	0	0.3
AT5G48953	0	0	0	0	0	0	0	0
AT1G78865	0.31	0.55	1.27	2.66	0.96	1.01	0.59	0.65
AT4G36100	0	0.09	0	0	0	0.26	0	0
AT4G17410	6.66	6.29	6.17	5.58	6.05	6.05	4.9	5.09
AT4G14710	109.2	120.61	107.23	99.52	131.57	113.11	118.35	96.15
AT5G58110	80.12	89.97	86.56	78.79	89.19	95.77	91.35	95.84
AT5G58465	0	0	0	0	0	0	0	0
AT5G30390	0	0	0	0	0	0	0	0
AT1G57565	0	0	0	0	0	0	0	0
AT4G31720	65.45	53.88	54.09	53.1	57.18	62.05	54.66	55.02
AT4G37620	1.36	0	0	0.75	0	1.51	1.5	0.83
AT4G14905	12.23	10.26	14.95	13.42	14.15	17.17	0	0.04
AT3G42430	0	0	0	0	0	0	0	0
AT3G05932	4.63	6.41	3.28	3.72	4.32	4.73	0.66	0.82
AT4G21105	323.1	304.41	405.57	420.83	338.35	320.1	538.54	413.01
AT2G22140	0.44	0.87	1.25	1.15	0.28	0.65	1.11	1.67
ATCG00860	0.16	0.37	0.71	0.55	0.47	0.76	0.26	0.1
AT3G52630	10.95	8.94	17	20.14	15.86	11.77	45.8	44.25
AT4G34065	0	0	0	0	0	0	0	0
AT2G24850	0.12	0.11	0.17	0.8	0.2	0.27	5.37	5.4
AT3G32373	0	0	0	0	0	0	0	0
AT1G24020	41.94	42.47	92.7	169.57	74.99	77.28	62.21	65.26
AT2G18730	29.72	25	32.37	31.07	28.7	28.9	32.5	31.4
AT2G16230	2.39	0.35	1.51	2.92	0.44	1.27	3.36	3.48
AT3G23910	17.9	11.48	9.76	8.48	10.36	11.46	11.67	12.74
AT5G56050	1.61	1.73	1.14	1.18	1.79	1.72	1.26	1.1
AT1G14840	8.86	10.76	13.43	16.73	9.78	11.88	15.09	17.58
AT5G66750	3.34	3.72	3.9	6.44	4.96	5.16	6.48	8.37
AT5G07220	168.67	190.98	168.37	159.49	192.44	165.91	113.24	96.76
AT4G10613	0	0	0	0	0	0	0	0
AT4G17718	0	0	0	0	0	0	0	0
AT3G63140	42.9	74.92	13.6	18.35	13.82	16.21	3.93	8.67
AT3G29789	0	0	0	0	0	0	0	0
AT3G18910	5.67	5.93	4.26	7	3.97	6.46	5.08	6.68
AT1G35620	59.65	59.24	55.91	65	57.19	63.4	53.14	61.82
AT5G05080	145.41	147.08	139.79	135.34	138.07	148.87	115.76	105.76
AT2G38690	0	0	0	0.25	0.19	0	0	0
AT1G72210	1.3	1.27	1.23	1.9	1.93	2.02	1.5	2.67
AT1G14685	44.39	47.74	44.68	44.3	36.34	43.99	27.09	27.91
AT4G29370	0.36	0.32	0.26	0.4	0	0	0.07	0.17
AT2G39870	24.52	26.86	23.01	21.67	23.66	24.61	16.71	19.2
AT3G53620	40.78	33.26	34.22	38.05	28.63	32.04	32.06	36.16
AT3G53380	8.15	7.89	9.84	10.25	7.09	8.46	4.91	6.48
AT5G28460	3.04	2.28	2.74	3.56	3.1	3.03	4.13	5.21
AT3G06483	23.95	22.17	22.4	30.22	24.17	24.34	23.67	24.82
AT3G61370	6.28	3.25	9.44	9.77	6.8	10.11	18.23	21.45
AT5G65670	412.83	378.28	393.8	404.59	406.14	395.28	322.66	329.98
AT4G13640	20.78	24.9	23.02	28.51	25.55	25.72	16.31	15.19
AT1G78922	0	0	0	0	0	0	0	0.08
AT5G24593	0	0	0	0	0	0	0	0
AT5G07675	0	0	0	0	0	0	0	0
AT2G23150	9.27	10.12	14.63	16.74	10.19	12.72	19.04	26.39
AT5G02580	30.05	26.38	38.17	37.36	40.63	40.52	104	64.9
AT3G09595	0	0	0	0	0	0	0	0
AT1G78890	84.68	76.01	64.17	61.34	72.2	63.4	44.54	42.95
AT2G40630	6.58	5.21	5.88	6.98	5.89	7.53	4.91	6.31
AT5G17120	0	0	0	0	0	0	0	0
AT4G13030	29.17	23.39	16.16	14.49	19.59	21.59	12.15	11.68
AT3G13630	0	0	0	0	0	0.2	0	0
AT5G09530	180.96	156.76	57.35	19.41	72.46	36.73	9.5	9.21
AT5G07340	23.16	23.13	25.75	32.05	25.17	24.57	44.65	58.54
AT4G21310	6.13	4.96	8.19	8.78	6.77	9.07	6.48	7.56
AT4G25950	0	0	0	0	0	0	0	0
AT3G42996	0	0	0	0	0	0	0	0
AT2G24692	0	0	0.65	0	0	0	15.93	18.55
AT1G01910	41.04	37.5	42.7	46.95	41.9	39.53	43.58	49.63
AT2G01090	25.33	20.13	33.43	33.81	23.67	28.22	46.41	43.69
AT3G06390	21.51	13.57	11.86	6.41	13.13	12.54	1.51	1.87
AT1G08730	0.24	0.28	0.48	0.33	0.13	0.38	0.52	0.62
AT5G37780	343.67	327.17	408.31	409.2	395.63	391.98	591.21	556.4
AT3G42880	0	0	0	0	0	0	0	0
AT1G68185	10.2	11.48	10.43	14.61	11.27	10.86	19.07	16.19
AT1G16080	15.29	20.76	15.98	25.58	20.55	18.63	19.14	21.85
AT3G15460	5.9	6.22	5.15	8.91	8.18	7.76	13.38	16.46
AT2G45000	16.68	10.79	9.82	12.8	10.27	12.52	8.58	12.98
AT2G38700	109.38	94.39	130.08	128.15	119.5	113.86	115.77	115.6
AT3G63200	74.5	77.59	51.35	53.15	61.36	50.48	27.16	30.25
AT5G53940	21.94	18.93	27.11	27.3	28.89	22.83	32.09	34.04
AT3G11110	0	0	0	0	0.44	0	0	0
AT4G08132	0	0	0	0	0	0	0	0
AT3G59090	40.76	41.14	38.31	36.75	36.78	36.71	19.44	21.39
AT3G53190	10.27	10.01	9.65	12.18	10.02	12.84	8.58	15.16
AT3G02530	32.31	29.67	33.87	46.22	31.81	34.46	48.77	63.53
AT5G02510	0	0	0	0	0	0	0	0
AT1G02340	68.32	62.57	58.36	54.72	94.11	92.44	21.44	27.36
AT4G22745	16.14	14.64	20.2	18.07	15.43	23.11	30.4	27.57
AT4G07806	0	0	0	0	0	0	0	0
AT5G04320	11.06	13.92	11.79	12.93	13.81	13.05	11.07	13.68
AT4G30960	290.4	346.94	335.59	288.96	327.77	302.04	386.36	351.36
AT2G01520	39.7	70.09	72.48	34.1	54.11	36.68	38.29	36.86
AT1G62880	26.04	23.27	15.03	16.21	23.03	23.69	12.66	10.89
AT3G51030	6.69	9.19	7.72	7.14	3.5	4.64	3.72	3.59
AT4G33865	165.54	129.9	169.45	251.42	135.98	152.51	545.38	423.39
AT3G25790	6.88	7.25	7.81	8.29	4.89	5.08	11.91	9.77
AT3G26445	8.04	12.01	3.42	6.2	5.38	4.75	3.55	1.46
AT3G45900	14.33	19.52	15.87	13.78	18.2	17.66	12.26	9.13
AT1G51170	40.1	34.16	36.36	36.06	43.07	40.56	19.51	18.74
AT5G26040	8.59	7.55	0.63	0.82	0.66	0.88	0.41	0.73
AT1G05385	10.1	17.23	8.64	10.8	10.68	8.78	7.28	7.59
AT3G47060	8.65	9.31	9.19	9.91	8.8	8.34	6.49	7.81
AT4G07520	0	0	0	0	0	0	0	0
AT5G55930	0.82	1.14	0.34	0.75	0.91	0.35	3.33	2.74
AT5G62210	0	0.22	0.52	0.94	0.2	0	0.91	1.66
AT5G43935	0	0	0	0	0	0	0	0
ATMG01190	1.72	6.67	4.64	2.75	5.19	8.57	4.51	0.38
AT4G12731	0	0	0	0	0	0	0	0
AT4G38670	7.21	6.55	8.24	8.41	9.79	7.44	5.55	5.31
AT2G22850	7.7	4.79	4.05	5.05	3.73	5.68	3.97	4.59
AT1G67560	38.82	30.36	37.6	37.11	36.91	37.88	34.19	39.73
AT1G26320	0	0	0	0	0	0	0	0.1
AT1G01680	0.66	0.58	0	0.12	0	0	0.16	0.14
AT5G21430	7.4	10.45	4.62	7.66	6.19	6.63	3.25	3.67
AT3G31450	0	0	0	0	0	0	0	0
AT2G45360	1.31	1.61	0.93	1.15	3.94	2.52	0.68	1.21
AT2G46020	18.47	14.9	15.07	13.02	15.78	15.91	10.11	15.34
AT2G04040	2.33	2.28	1.38	1.07	2.39	2.97	0.58	0.88
AT1G67025	0	0	0	0	0	0	0	0.05
AT5G28929	0	0	0	0	0	0	0	0
AT1G64160	0	0	0.19	0.14	0.44	0	0.1	0
AT5G51140	22.64	24.85	16.26	20.46	18.97	17.58	20.37	25.49
AT4G06615	0	0	0	0	0	0	0	0
AT3G58910	0	0	0	0	0.3	0	0	0
AT1G65660	25.24	29.08	26.03	24.47	25.55	28.93	23.02	26.33
AT5G42820	47.32	54.67	59.12	54.37	52.9	61.69	56.14	63.71
AT5G03680	0.18	0.79	0.32	0.5	0.45	0.4	0.37	0.47
AT2G23770	7.63	7.82	8.6	5.43	7.98	8.08	3.4	4.51
AT2G20930	57.73	47.23	59.67	60.38	51.1	66.13	90.7	67.85
AT1G51600	10.65	11.85	10.99	13.46	11.78	13	13.48	10.88
AT1G70780	152.77	126.43	129.81	126.08	124.09	127.78	148.95	122.95
AT1G42367	0	0	0	0	0	0	0	0
AT3G26610	8.11	7.74	8.31	8.44	7.47	6.17	5.4	6.99
AT2G34010	13.59	8.26	5.36	5.55	9.97	11.54	3.44	4.41
AT4G28670	0	0	0	0	0	0	0.04	0.03
AT1G66160	7.74	6.4	7.6	8.49	11.7	8.33	11.91	10.15
AT2G06860	0	0	0	0	0	0.05	0	0
AT4G17512	0	0	0	0	0	0	0	0
AT1G48090	8.2	6.6	7.62	8.01	7.24	7.03	4.76	7.74
AT4G26055	0	0	2.17	0	0	0	6.47	5.23
AT4G12405	0	0	0	0	0	0	0	0
AT3G49750	10.92	10.11	9	10.42	10.11	13.4	9.22	11.26
AT1G70760	44.23	60.61	20.67	21.94	25.97	24.37	8.27	13.46
AT3G47510	15.34	13.13	12.28	11.48	15.13	11.63	4.38	6.16
AT4G16000	9.02	7.29	4.87	4.17	7.85	8.53	1.34	2.99
AT1G47765	0	0	0	0	0	0	0	0
AT4G14403	0	0	0	0	0	0	0	0
AT1G18300	10.57	9.46	8.9	7.76	8.19	13.89	6.56	6.23
AT1G73680	34.66	31.37	40.29	36.02	38.01	37.34	29.76	28.9
AT3G03826	0	0	0	0	0	0	0	0
AT3G42766	0	0	0	0	0	0	0	0
AT4G04610	19.18	18.97	28.11	32.87	24.64	19.19	39.14	35.49
AT1G35040	0	0	0	0	0	0	0	0
AT1G54460	27.98	26.88	29.31	29.54	26.15	30.93	38.39	40.13
AT4G25550	42.6	28.85	37.23	49.8	33.17	36.39	47.2	48.69
AT4G39620	9.23	8.4	9.33	13.91	8.78	6.99	11.61	14.81
AT2G35510	22.97	20.49	18.46	22.05	18.71	20.87	17.18	18.65
AT3G61530	12.11	11.53	10.37	11.91	13.47	11.15	11.55	10.57
AT4G11810	0	0.07	0.11	0.04	0.13	0	0.12	0.07
AT1G12015	0	0	0	0	0	0	0	0
AT3G10116	0	0	0	0	0	0	0	0
AT5G46150	35.91	36.38	28.07	30.51	30.61	32.53	28.91	26.57
AT2G12260	0	0	0	0	0	0	0	0
AT4G20780	30.73	20.88	34.31	35.08	38.79	41.3	62.19	47.15
[truncated: 31,604 more rows]
