# Supplementary material for: Epigenetic silencing of a multifunctional plant stress regulator
Source: eLife. 2019 Aug 16;8:e47835. doi: 10.7554/eLife.47835 (PMC6739875; doi:10.7554/eLife.47835)
Supplement: Supplementary file 8. — Tables displays genes that a robust ET-induced eviction of H2A.Z in Ler and Col-0 (1.3 fold enrichment). Significant differential enrichment was determined with SICER. A list [file elife-47835-supp8.xlsx]

## Sheet: SICER Ler H2A.Z merge air vs ET
Supplementary File 8: Genes with a robust eviction of H2A.Z in response to ET
SICER Ler air H2A.Z merge vs Ler 4h ET H2A.Z merge
Genes that show ET-induced H2A.Z eviction in Ler
chromosome	domain start	domain end	ChIP (reads)	CONTROL (reads)	p-value	fold change	FDR threshold	gene name
chr3	22129600	22130399	291	99	1.2255e-63	3.23015	3.86544e-60	AT3G59900
chr4	13675800	13676599	547	268	7.63222e-63	2.24294	2.06343e-59	AT4G27310
chr5	979000	979799	278	139	1.0505e-31	2.19783	1.07463e-29	AT5G03730
chr5	17829800	17831199	921	503	4.39106e-81	2.01213	8.31007e-77	AT5G44260
chr4	4070800	4072199	850	465	1.04827e-74	2.00877	4.95964e-71	AT4G06744
chr5	84600	85999	867	475	7.14408e-76	2.00581	4.50672e-72	AT5G01210
chr5	84600	85999	867	475	7.14408e-76	2.00581	4.50672e-72	AT5G01215
chr3	8254600	8256399	678	378	2.83248e-57	1.97107	5.95608e-54	AT3G23150
chr3	9396400	9397199	374	213	6.73603e-31	1.92955	6.21851e-29	AT3G25730
chr4	16498400	16499399	565	325	2.28826e-44	1.91042	1.20292e-41	AT4G34530
chr4	16498400	16499399	565	325	2.28826e-44	1.91042	1.20292e-41	AT4G34540
chr1	8994400	8995399	550	318	1.16169e-42	1.90064	5.36218e-40	AT1G25570
chr5	4937800	4938799	607	352	1.77849e-46	1.89501	1.34632e-43	AT5G15210
chr2	15150800	15151399	346	203	1.33012e-26	1.87303	7.01186e-25	AT2G36080
chr5	20192600	20193399	438	257	4.27688e-33	1.87286	5.54383e-31	AT5G49700
chr1	1155400	1157799	1003	590	2.28938e-72	1.86816	8.66531e-69	AT1G04310
chr1	3322800	3323599	413	247	9.80816e-30	1.83746	8.10565e-28	AT1G10140
chr2	17195000	17195799	435	261	6.35867e-31	1.83153	5.89891e-29	AT2G41230
chr2	17195000	17195799	435	261	6.35867e-31	1.83153	5.89891e-29	AT2G41231
chr4	14392200	14393399	848	513	8.44983e-57	1.81653	1.59913e-53	AT4G29190
chr1	11512800	11512999	114	69	2.26574e-09	1.8156	9.17395e-09	AT1G32020
chr2	16688200	16689999	1190	722	4.33348e-78	1.81123	4.10055e-74	AT2G39975
chr2	16688200	16689999	1190	722	4.33348e-78	1.81123	4.10055e-74	AT2G39980
chr3	7323800	7324399	318	195	8.2714e-22	1.79208	2.29862e-20	AT3G20898
chr3	7323800	7324399	318	195	8.2714e-22	1.79208	2.29862e-20	AT3G20900
chr4	8878200	8879399	761	475	1.28509e-46	1.76058	1.01335e-43	AT4G15550
chr1	9151600	9152599	607	385	8.27631e-36	1.73258	1.47763e-33	AT1G26460
chr2	11041800	11042799	826	530	3.51535e-46	1.71265	2.464e-43	AT2G25900
chr5	25017200	25017999	508	326	3.17423e-29	1.71242	2.45193e-27	AT5G62280
chr3	8667200	8667599	162	104	1.16212e-10	1.71177	5.81058e-10	AT3G23980
chr3	13489600	13489999	165	106	8.40348e-11	1.71058	4.30059e-10	AT3G32930
chr2	17086600	17087199	226	146	7.50405e-14	1.70106	6.25338e-13	AT2G40940
chr1	3076600	3077999	504	326	2.74848e-28	1.69894	1.85768e-26	AT1G09530
chr2	7837000	7837599	287	186	6.86861e-17	1.69564	9.06475e-16	AT2G18020
chr3	7001600	7002399	487	316	3.97565e-27	1.69358	2.27997e-25	AT3G20050
chr1	12023200	12023999	383	249	1.20969e-21	1.6903	3.26582e-20	AT1G33140
chr3	1018800	1019199	212	138	8.07639e-13	1.68819	5.69046e-12	AT3G03940
chr4	13802400	13803199	481	316	9.37198e-26	1.67272	4.33655e-24	AT4G27640
chr3	18160200	18161399	505	332	7.14203e-27	1.67154	3.95213e-25	AT3G48990
chr1	23941800	23942799	786	518	2.68379e-40	1.66747	9.40569e-38	AT1G64450
chr1	8982200	8982999	385	254	9.70723e-21	1.66568	2.26522e-19	AT1G25560
chr4	11217000	11217799	507	335	1.60519e-26	1.66314	8.36865e-25	AT4G20980
chr2	13824800	13825599	486	322	2.81297e-25	1.65861	1.22945e-23	AT2G32560
chr5	10294800	10295199	163	108	8.96361e-10	1.65855	3.88718e-09	AT5G28300
chr5	794000	794599	264	175	1.25625e-14	1.65779	1.19051e-13	AT5G03290
chr4	17999200	18000199	527	350	5.1568e-27	1.65465	2.92193e-25	AT4G38470
chr4	8054800	8055599	338	225	6.3627e-18	1.65082	9.82972e-17	AT4G13940
chr2	12142800	12143599	438	293	2.96637e-22	1.64275	8.70364e-21	AT2G28390
chr4	9214200	9214799	281	188	5.47398e-15	1.64253	5.46099e-14	AT4G16280
chr4	15635000	15635399	215	144	7.0088e-12	1.64074	4.26089e-11	AT4G32380
chr1	17432600	17433399	409	274	8.1907e-21	1.64035	1.94491e-19	AT1G47500
chr3	22373200	22374199	728	488	2.41808e-35	1.63937	3.97933e-33	AT3G60530
chr3	17352200	17352799	220	148	6.05965e-12	1.63352	3.7149e-11	AT3G47120
chr1	11751200	11751999	587	395	1.59149e-28	1.63307	1.10731e-26	AT1G32500
chr3	22741800	22742199	211	142	1.61183e-11	1.6329	9.22125e-11	AT3G61460
chr1	24145600	24145999	169	114	1.5688e-09	1.6291	6.53091e-09	AT1G64990
chr1	23460600	23460799	111	75	7.54001e-07	1.6264	2.00358e-06	AT1G63245
chr4	17430400	17431399	408	276	4.33716e-20	1.62449	9.08978e-19	AT4G36970
chr1	23046800	23047399	439	298	3.32559e-21	1.61887	8.40277e-20	AT1G62330
chr3	5705800	5706399	262	178	2.04906e-13	1.61751	1.58928e-12	AT3G16770
chr1	2696400	2697199	537	365	2.31519e-25	1.61676	1.02852e-23	AT1G08520
chr3	21726800	21727599	525	357	8.3874e-25	1.61605	3.48096e-23	AT3G58750
chr2	15323400	15323799	166	113	3.91975e-09	1.61434	1.51824e-08	AT2G36530
chr5	12588800	12589599	472	322	2.98899e-22	1.61083	8.75644e-21	AT5G33320
chr5	26385400	26385999	236	161	4.15039e-12	1.61083	2.61559e-11	AT5G65960
chr5	26620000	26620599	321	219	9.04866e-16	1.61074	1.02054e-14	AT5G66680
chr2	6921200	6921999	299	204	8.04396e-15	1.61067	7.8349e-14	AT2G15890
chr1	18283000	18283599	243	166	2.35043e-12	1.60865	1.53175e-11	AT1G49400
chr5	4272000	4272599	221	151	2.11288e-11	1.60835	1.18759e-10	AT5G13330
chr2	14590000	14591799	832	569	2.78688e-37	1.60685	5.99337e-35	AT2G34650
chr3	23220200	23221199	573	392	2.64722e-26	1.60632	1.33597e-24	AT3G62770
chr1	1922400	1922999	279	191	8.42636e-14	1.60522	6.97284e-13	AT1G06290
chr4	1104600	1105199	359	246	3.85985e-17	1.6037	5.27419e-16	AT4G02510
chr3	3995000	3995599	286	196	4.77319e-14	1.60352	4.10044e-13	AT3G12585
chr3	3995000	3995599	286	196	4.77319e-14	1.60352	4.10044e-13	AT3G12587
chr2	17378400	17378999	482	331	3.76807e-22	1.60023	1.09205e-20	AT2G41680
chr4	13638000	13638399	166	114	6.96476e-09	1.60018	2.59363e-08	AT4G27230
chr1	5837600	5838199	380	261	7.04757e-18	1.59995	1.07647e-16	AT1G17070
chr1	2898600	2899399	297	204	2.11585e-14	1.59989	1.9279e-13	AT1G09010
chr4	2023200	2023799	243	167	4.13509e-12	1.59902	2.60942e-11	AT4G04180
chr2	14189200	14190399	803	552	2.23948e-35	1.5986	3.71773e-33	AT2G33500
chr2	9322400	9322599	109	75	2.06517e-06	1.59709	5.11762e-06	AT2G21870
chr2	3056600	3057199	231	159	1.51658e-11	1.59654	8.74241e-11	AT2G07360
chr1	20402600	20402999	183	126	1.58974e-09	1.59605	6.60646e-09	AT1G54630
chr4	5286200	5286799	286	197	8.34526e-14	1.59538	6.9148e-13	AT4G08350
chr3	23345800	23347199	913	629	1.34485e-39	1.59509	4.03988e-37	AT3G63200
chr4	9727600	9728599	837	577	2.13869e-36	1.5941	4.44778e-34	AT4G17440
chr1	3130400	3130999	467	322	3.26262e-21	1.59377	8.26575e-20	AT1G09660
chr5	981800	982799	559	386	7.44814e-25	1.59144	3.11161e-23	AT5G03740
chr5	4060800	4061999	959	663	6.1333e-41	1.58953	2.52332e-38	AT5G12860
chr1	22980800	22981799	674	466	2.1222e-29	1.58942	1.67345e-27	AT1G62190
chr1	3071200	3071999	532	368	1.33421e-23	1.58865	4.61609e-22	AT1G09520
chr3	19648800	19649399	286	198	1.44839e-13	1.58732	1.15511e-12	AT3G52990
chr5	26308200	26308999	442	306	6.82829e-20	1.58732	1.40158e-18	AT5G65760
chr4	4204400	4205199	501	347	3.06002e-22	1.58662	8.93687e-21	AT4G07410
chr3	3322400	3323199	381	264	2.28195e-17	1.58594	3.23975e-16	AT3G10630
chr4	801800	802399	241	167	1.07554e-11	1.58586	6.34892e-11	AT4G01860
chr5	17806600	17807199	435	302	2.07191e-19	1.58288	3.98484e-18	AT5G44210
chr3	1293800	1294399	354	246	4.12964e-16	1.58137	4.84222e-15	AT3G04740
chr1	5122800	5123599	555	386	4.8173e-24	1.58005	1.78061e-22	AT1G14850
chr4	9308000	9308399	168	117	1.41967e-08	1.57793	5.02851e-08	AT4G16520
chr3	19975600	19977399	1186	826	1.05958e-48	1.57786	1.33684e-45	AT3G53950
chr2	11341800	11342199	201	140	6.79992e-10	1.57773	3.02227e-09	AT2G26670
chr1	18771200	18771999	590	411	2.81092e-25	1.57752	1.2314e-23	AT1G50659
chr1	18771200	18771999	590	411	2.81092e-25	1.57752	1.2314e-23	AT1G50660
chr5	5017800	5018399	452	315	8.22828e-20	1.57686	1.6619e-18	AT5G15450
chr5	21481600	21481799	99	69	9.14804e-06	1.57671	2.02962e-05	AT5G52975
chr3	2953800	2954599	390	272	2.55435e-17	1.57565	3.61564e-16	AT3G09630
chr3	2365400	2366199	676	472	2.08231e-28	1.57387	1.42266e-26	AT3G07390
chr3	2413000	2414199	428	299	1.06773e-18	1.57303	1.83699e-17	AT3G07560
chr3	2413000	2414199	428	299	1.06773e-18	1.57303	1.83699e-17	AT3G07565
chr5	23555400	23556799	657	459	1.31616e-27	1.57296	8.13998e-26	AT5G58220
chr5	23555400	23556799	657	459	1.31616e-27	1.57296	8.13998e-26	AT5G58230
chr2	6036600	6037599	478	334	1.24402e-20	1.5727	2.85371e-19	AT2G14255
chr1	26583600	26583999	249	174	1.12028e-11	1.57259	6.59858e-11	AT1G70518
chr4	10411000	10411399	206	144	5.67762e-10	1.57206	2.55405e-09	AT4G19006
chr5	4393400	4393999	406	284	9.37924e-18	1.57099	1.40207e-16	AT5G13640
chr3	8003800	8004799	538	377	1.01352e-22	1.56821	3.17038e-21	AT3G22590
chr3	4469200	4469799	301	211	1.4519e-13	1.56765	1.15644e-12	AT3G13670
chr1	23826200	23826999	412	289	8.3734e-18	1.56662	1.26773e-16	AT1G64190
chr5	6128000	6128999	513	360	1.21608e-21	1.56596	3.27374e-20	AT5G18470
chr1	12685200	12685999	369	259	4.0945e-16	1.56564	4.80399e-15	AT1G34630
chr3	1152800	1153599	490	344	9.9163e-21	1.56532	2.31116e-19	AT3G04340
chr3	17513400	17513999	279	196	1.28904e-12	1.56427	8.77205e-12	AT3G47520
chr5	2825800	2826399	249	175	1.9075e-11	1.5636	1.07631e-10	AT5G08690
chr2	5597800	5598399	431	303	2.21978e-18	1.56315	3.65934e-17	AT2G13440
chr4	12645600	12646399	411	289	1.3204e-17	1.56282	1.93261e-16	AT4G24470
chr3	20044000	20044599	253	178	1.47937e-11	1.56194	8.5435e-11	AT3G54130
chr5	21017000	21017799	612	431	4.44008e-25	1.56041	1.8968e-23	AT5G51740
chr5	3931600	3932199	474	334	7.68764e-20	1.55954	1.56104e-18	AT5G12170
chr1	7565000	7565799	403	284	3.68239e-17	1.55938	5.05728e-16	AT1G21580
chr5	565200	565799	339	239	1.00816e-14	1.55871	9.68007e-14	AT5G02530
chr3	3695000	3696199	822	580	1.014e-32	1.55743	1.21456e-30	AT3G11690
chr1	29993200	29993799	340	240	1.0772e-14	1.5568	1.03168e-13	AT1G79700
chr1	30093000	30093599	337	238	1.48356e-14	1.55603	1.38785e-13	AT1G80000
chr2	15992800	15993399	297	210	5.32914e-13	1.55418	3.86562e-12	AT2G38170
chr4	18061200	18062199	461	326	4.31031e-19	1.55399	7.91968e-18	AT4G38640
chr5	726800	727599	584	413	1.21395e-23	1.55392	4.23876e-22	AT5G03100
chr3	18504200	18504799	205	145	1.53147e-09	1.55364	6.38393e-09	AT3G49910
chr2	18199600	18200199	352	249	5.02229e-15	1.55349	5.05569e-14	AT2G43945
chr4	11277400	11278799	903	639	2.51366e-35	1.55293	4.10095e-33	AT4G21140
chr4	11277400	11278799	903	639	2.51366e-35	1.55293	4.10095e-33	AT4G21150
chr5	23773200	23773799	308	218	2.32204e-13	1.5526	1.78928e-12	AT5G58870
chr5	25208600	25209399	428	303	8.58054e-18	1.55226	1.29289e-16	AT5G62760
chr1	954600	955999	994	704	1.54743e-38	1.5516	4.12466e-36	AT1G03790
chr3	21468200	21469199	720	510	1.74331e-28	1.55141	1.19536e-26	AT3G57980
chr1	9662200	9662799	409	290	5.44103e-17	1.54985	7.2926e-16	AT1G27752
chr3	18404400	18404999	320	227	1.07907e-13	1.54913	8.77581e-13	AT3G49645
chr5	16718000	16718799	469	333	4.31568e-19	1.54772	7.92185e-18	AT5G41770
chr5	25452000	25452399	169	120	4.43042e-08	1.54764	1.44462e-07	AT5G63570
chr5	20696600	20697199	307	218	3.63709e-13	1.54756	2.70992e-12	AT5G50860
chr1	29016200	29016599	207	147	1.74581e-09	1.54745	7.20597e-09	AT1G77230
chr1	29016200	29016599	207	147	1.74581e-09	1.54745	7.20597e-09	AT1G77235
chr5	4935600	4936399	356	253	6.48843e-15	1.5463	6.42225e-14	AT5G15200
chr1	25262200	25262599	159	113	1.09969e-07	1.54626	3.35185e-07	AT1G67430
chr4	8218400	8218999	294	209	1.22679e-12	1.54584	8.37551e-12	AT4G14270
chr5	3299600	3300199	305	217	5.33412e-13	1.54456	3.86775e-12	AT5G10480
chr5	25715800	25716799	565	402	2.10424e-22	1.5445	6.31104e-21	AT5G64290
chr4	10889000	10889599	319	227	1.68592e-13	1.54429	1.32776e-12	AT4G20150
chr4	16927800	16929199	860	612	5.38426e-33	1.54423	6.83873e-31	AT4G35720
chr1	22153800	22154599	451	321	2.90105e-18	1.54396	4.72075e-17	AT1G60080
chr1	30033200	30033799	243	173	1.02579e-10	1.54356	5.18098e-10	AT1G79830
chr5	6942400	6942999	323	230	1.30444e-13	1.54326	1.0496e-12	AT5G20510
chr2	12877800	12878599	344	245	2.32185e-14	1.54297	2.10445e-13	AT2G30160
chr1	6222200	6223199	716	510	1.01713e-27	1.54279	6.3951e-26	AT1G18080
chr5	7846000	7846599	358	255	7.35372e-15	1.54279	7.2071e-14	AT5G23290
chr3	21280200	21280999	584	416	5.53346e-23	1.54271	1.80553e-21	AT3G57490
chr4	6920600	6920999	167	119	6.53728e-08	1.54218	2.0699e-07	AT4G11380
chr1	2808800	2809599	435	310	1.33337e-17	1.54203	1.95007e-16	AT1G08770
chr1	18359600	18360399	529	377	5.69279e-21	1.54198	1.38123e-19	AT1G49600
chr5	1390000	1390999	717	511	1.08124e-27	1.54192	6.75331e-26	AT5G04810
chr5	2616400	2617199	491	350	1.36492e-19	1.54162	2.68236e-18	AT5G08139
chr4	6384600	6385199	293	209	1.9141e-12	1.54059	1.26836e-11	AT4G10300
chr1	362000	363199	1036	739	6.2372e-39	1.54056	1.73587e-36	AT1G02060
chr3	8690800	8691199	164	117	9.04043e-08	1.54036	2.79925e-07	AT3G24065
chr5	24611000	24611599	262	187	2.65339e-11	1.53966	1.47044e-10	AT5G61170
chr3	18657400	18658199	636	454	1.22004e-24	1.53945	4.93361e-23	AT3G50330
chr1	28418600	28419399	395	282	4.70759e-16	1.53926	5.48253e-15	AT1G75680
chr5	947200	947999	444	317	8.49597e-18	1.53918	1.28219e-16	AT5G03668
chr5	947200	947999	444	317	8.49597e-18	1.53918	1.28219e-16	AT5G03670
chr3	5493000	5493599	350	250	2.03175e-14	1.53848	1.85664e-13	AT3G16200
chr5	4597000	4598399	680	486	4.48254e-26	1.53758	2.18077e-24	AT5G14240
chr5	4597000	4598399	680	486	4.48254e-26	1.53758	2.18077e-24	AT5G14250
chr1	12010800	12011599	386	276	1.22006e-15	1.53689	1.34086e-14	AT1G33120
chr3	22805200	22806199	832	595	2.33006e-31	1.53664	2.26135e-29	AT3G61630
chr2	17555200	17555599	165	118	9.62838e-08	1.53662	2.96964e-07	AT2G42080
chr1	28241600	28242599	745	533	2.97895e-28	1.53601	1.99917e-26	AT1G75240
chr1	8821000	8821999	531	380	1.05684e-20	1.53559	2.45408e-19	AT1G25150
chr1	20864200	20864999	486	348	4.4914e-19	1.53469	8.19669e-18	AT1G55810
chr1	20864200	20864999	486	348	4.4914e-19	1.53469	8.19669e-18	AT1G55820
chr2	14966600	14967199	208	149	3.09723e-09	1.53406	1.22319e-08	AT2G35630
chr3	2261200	2261799	409	293	2.4579e-16	1.53398	2.96467e-15	AT3G07140
chr1	11314600	11314999	194	139	9.91787e-09	1.53374	3.60884e-08	AT1G31600
chr4	15638600	15639599	681	488	7.78906e-26	1.53353	3.67601e-24	AT4G32400
chr1	23614400	23615399	674	483	1.37816e-25	1.53348	6.31519e-24	AT1G63680
chr5	16424000	16424399	173	124	5.70844e-08	1.53317	1.82456e-07	AT5G41010
chr1	9605400	9605999	258	185	5.6813e-11	1.53254	2.98e-10	AT1G27600
chr5	4591600	4592599	640	459	2.53647e-24	1.53226	9.69751e-23	AT5G14230
chr2	18228400	18228999	290	208	4.34716e-12	1.53214	2.72869e-11	AT2G44065
chr4	7071800	7072399	237	170	3.22773e-10	1.53202	1.5079e-09	AT4G11740
chr3	6970000	6971599	750	538	3.99897e-28	1.53195	2.63695e-26	AT3G20000
chr3	6970000	6971599	750	538	3.99897e-28	1.53195	2.63695e-26	AT3G20010
chr5	2941800	2942599	578	415	4.59397e-22	1.53054	1.31529e-20	AT5G09450
chr5	4345600	4346199	305	219	1.45523e-12	1.53045	9.82875e-12	AT5G13530
chr5	2010400	2010999	447	321	1.66751e-17	1.53027	2.40347e-16	AT5G06570
chr3	22151200	22151999	330	237	1.99462e-13	1.53014	1.55214e-12	AT3G59970
chr3	9823800	9824199	181	130	3.38304e-08	1.53003	1.12323e-07	AT3G26730
chr1	12084800	12085799	646	464	2.20569e-24	1.52996	8.50158e-23	AT1G33330
chr5	14681400	14681999	341	245	8.66186e-14	1.52951	7.15208e-13	AT5G37130
chr1	20952000	20953399	1190	855	4.35924e-43	1.52949	2.17102e-40	AT1G56020
chr5	23952200	23952799	373	268	6.70527e-15	1.52946	6.60579e-14	AT5G59380
chr4	13105800	13106999	775	557	9.11894e-29	1.52901	6.66316e-27	AT4G25730
chr1	26886600	26887399	420	302	1.75208e-16	1.52829	2.17287e-15	AT1G71340
chr3	17126200	17126799	267	192	3.58858e-11	1.52818	1.94206e-10	AT3G46510
chr3	10090200	10090999	470	338	3.35752e-18	1.52808	5.38484e-17	AT3G27320
chr2	16683000	16683599	303	218	2.1206e-12	1.52739	1.39494e-11	AT2G39960
chr4	260200	260999	528	380	3.86633e-20	1.52692	8.17545e-19	AT4G00620
chr1	16278200	16278599	182	131	3.59219e-08	1.52674	1.18871e-07	AT1G43190
chr1	20363400	20364199	476	343	2.91087e-18	1.52503	4.73266e-17	AT1G54520
chr4	9136600	9137199	358	258	3.26259e-14	1.52485	2.87184e-13	AT4G16143
chr1	10828600	10829199	265	191	5.23063e-11	1.52467	2.75814e-10	AT1G30570
chr3	8622200	8623199	491	354	9.80378e-19	1.5242	1.6975e-17	AT3G23880
chr1	1732800	1733599	448	323	2.87943e-17	1.52419	4.03056e-16	AT1G05790
chr2	268800	269399	251	181	1.66412e-10	1.52391	8.11898e-10	AT2G01600
chr1	27244400	27245599	434	313	9.06247e-17	1.52374	1.1699e-15	AT1G72370
chr1	27244400	27245599	434	313	9.06247e-17	1.52374	1.1699e-15	AT1G72390
chr1	22051200	22051999	488	352	1.34285e-18	1.5235	2.27718e-17	AT1G59900
chr3	22313600	22314399	542	391	2.00109e-20	1.52331	4.45536e-19	AT3G60360
chr4	345000	345799	499	360	5.85338e-19	1.52322	1.04014e-17	AT4G00800
chr5	25706800	25707599	298	215	4.23885e-12	1.52315	2.6669e-11	AT5G64270
chr1	6808800	6809599	431	311	1.2419e-16	1.52294	1.56791e-15	AT1G19690
chr1	11162400	11164999	1279	923	2.68411e-45	1.52277	1.5393e-42	AT1G31230
chr1	11162400	11164999	1279	923	2.68411e-45	1.52277	1.5393e-42	AT1G31240
chr5	583000	584399	956	690	2.20955e-34	1.52256	3.26685e-32	AT5G02590
chr5	583000	584399	956	690	2.20955e-34	1.52256	3.26685e-32	AT5G02600
chr3	2284800	2285599	583	421	9.93324e-22	1.52178	2.71657e-20	AT3G07180
chr5	25314600	25315599	785	567	1.60599e-28	1.52143	1.11331e-26	AT5G63100
chr3	19820800	19821599	544	393	2.23905e-20	1.52115	4.9272e-19	AT3G53460
chr1	23419400	23420399	400	289	1.68885e-15	1.52099	1.82533e-14	AT1G63150
chr3	6994800	6995599	465	336	1.08437e-17	1.52082	1.60577e-16	AT3G20040
chr3	4014200	4014799	220	159	2.32833e-09	1.52051	9.40324e-09	AT3G12640
chr2	14317600	14318399	361	261	3.86864e-14	1.51996	3.36926e-13	AT2G33845
chr4	6406600	6406999	260	188	1.04618e-10	1.51978	5.27551e-10	AT4G10330
chr5	6652400	6652999	271	196	4.52044e-11	1.51942	2.41324e-10	AT5G19690
chr1	5444400	5445399	723	523	2.86589e-26	1.51915	1.43864e-24	AT1G15810
chr1	8068000	8068399	188	136	3.10549e-08	1.51909	1.03965e-07	AT1G22780
chr2	13461400	13462399	687	497	4.69259e-25	1.51903	1.99567e-23	AT2G31650
chr1	8948400	8949199	546	395	2.50254e-20	1.51901	5.46888e-19	AT1G25480
chr5	15724600	15725399	311	225	2.0567e-12	1.51895	1.35621e-11	AT5G39250
chr1	23955600	23956599	608	440	2.23597e-22	1.5185	6.68494e-21	AT1G64510
chr1	23955600	23956599	608	440	2.23597e-22	1.5185	6.68494e-21	AT1G64520
chr4	7997800	7998599	391	283	4.34531e-15	1.51829	4.43076e-14	AT4G13780
chr5	3950000	3950999	525	380	1.39092e-19	1.51824	2.73061e-18	AT5G12220
chr2	12552600	12553399	308	223	2.82176e-12	1.51779	1.81824e-11	AT2G29200
chr3	18991400	18991999	290	210	1.16062e-11	1.51755	6.81921e-11	AT3G51120
chr1	20027600	20028799	929	673	5.90214e-33	1.51693	7.39721e-31	AT1G53645
chr5	4627600	4628999	577	418	3.00235e-21	1.51693	7.6473e-20	AT5G14350
chr4	11785000	11785999	548	397	2.79399e-20	1.51689	6.04301e-19	AT4G22290
chr1	8742000	8742599	287	208	1.59278e-11	1.51629	9.12605e-11	AT1G24706
chr5	16507800	16508799	556	403	1.66648e-20	1.51612	3.74118e-19	AT5G41270
chr3	21823600	21824199	309	224	2.98325e-12	1.51592	1.91708e-11	AT3G59040
chr1	30270600	30270999	200	145	1.41093e-08	1.51575	5.00129e-08	AT1G80500
chr5	20675800	20676599	400	290	2.73358e-15	1.51575	2.87086e-14	AT5G50810
chr5	10135600	10136399	393	285	4.85281e-15	1.51535	4.89811e-14	AT5G28150
chr1	5399000	5399799	324	235	9.95944e-13	1.5151	6.90665e-12	AT1G15690
chr4	1428400	1428799	164	119	2.47243e-07	1.51447	7.1284e-07	AT4G03260
chr1	1235200	1235999	405	294	2.22716e-15	1.51381	2.36129e-14	AT1G04530
chr3	18514400	18515399	457	332	4.74179e-17	1.51267	6.40989e-16	AT3G49940
chr4	16402200	16402799	344	250	2.70845e-13	1.51211	2.05688e-12	AT4G34265
chr2	2184600	2185199	366	266	5.0967e-14	1.51204	4.36054e-13	AT2G05765
chr5	1340400	1341399	429	312	4.68907e-16	1.51101	5.4677e-15	AT5G04670
chr3	4480800	4481799	602	438	1.07943e-21	1.51038	2.9393e-20	AT3G13682
chr5	7741800	7742799	849	618	1.07942e-29	1.50968	8.88174e-28	AT5G23070
chr2	7767000	7767799	386	281	1.3874e-14	1.50954	1.30112e-13	AT2G17880
chr3	2819200	2819799	375	273	3.19568e-14	1.5095	2.8195e-13	AT3G09180
chr2	16675000	16675799	364	265	7.36374e-14	1.50946	6.13915e-13	AT2G39940
chr2	7200800	7201599	402	293	4.89865e-15	1.50773	4.94173e-14	AT2G16600
chr1	7581200	7581799	225	164	3.07562e-09	1.50766	1.21516e-08	AT1G21630
chr2	14359000	14359999	572	417	1.52338e-20	1.50739	3.45477e-19	AT2G33980
chr2	17010000	17010799	572	417	1.52338e-20	1.50739	3.45477e-19	AT2G40760
chr5	18683400	18683999	325	237	1.69411e-12	1.50695	1.1309e-11	AT5G46070
chr1	10468000	10468999	765	558	9.95323e-27	1.50658	5.39727e-25	AT1G29900
chr1	29832200	29832999	514	375	1.32241e-18	1.50625	2.24655e-17	AT1G79280
chr4	15067200	15068799	678	495	7.89269e-24	1.50518	2.83972e-22	AT4G30960
chr2	3781400	3782199	378	276	3.74514e-14	1.50504	3.26621e-13	AT2G09990
chr4	17813000	17814999	1113	813	1.07043e-37	1.50442	2.4407e-35	AT4G37890
chr4	17813000	17814999	1113	813	1.07043e-37	1.50442	2.4407e-35	AT4G37895
chr5	1944600	1945399	427	312	1.08254e-15	1.50397	1.2023e-14	AT5G06360
chr4	10276000	10278399	1014	741	1.80485e-34	1.50378	2.71086e-32	AT4G18670
chr5	26701000	26702599	959	701	1.12203e-32	1.50337	1.3355e-30	AT5G66860
chr3	16624200	16624999	372	272	7.00341e-14	1.50293	5.85422e-13	AT3G45300
chr5	2894800	2895399	339	248	8.58878e-13	1.50215	6.02456e-12	AT5G09330
chr4	11169200	11169999	436	319	6.77087e-16	1.50197	7.72385e-15	AT4G20850
chr5	3995400	3995999	328	240	1.98254e-12	1.50185	1.31004e-11	AT5G12350
chr5	1918200	1919599	727	532	3.71283e-25	1.50171	1.60058e-23	AT5G06280
chr5	1918200	1919599	727	532	3.71283e-25	1.50171	1.60058e-23	AT5G06290
chr1	11332800	11333599	496	363	8.5713e-18	1.50155	1.29252e-16	AT1G31660
chr4	2664400	2665199	414	303	3.58349e-15	1.50149	3.69779e-14	AT4G05160
chr3	19592200	19592799	351	257	3.91984e-13	1.50085	2.91027e-12	AT3G52860
chr3	4062400	4063199	430	315	1.26302e-15	1.50011	1.38647e-14	AT3G12780
chr1	26430600	26431399	359	263	2.32375e-13	1.50004	1.78987e-12	AT1G70190
chr1	17569600	17570399	374	274	7.76254e-14	1.49998	6.45173e-13	AT1G47750
chr1	20470800	20471599	427	313	1.72471e-15	1.49916	1.8609e-14	AT1G54920
chr4	16997400	16997999	251	184	7.04321e-10	1.49907	3.12161e-09	AT4G35890
chr4	6645800	6646399	281	206	7.74986e-11	1.49901	3.99962e-10	AT4G10810
chr5	1399600	1400399	562	412	9.32091e-20	1.49901	1.86863e-18	AT5G04820
chr1	28256600	28257199	248	182	9.64972e-10	1.49742	4.16183e-09	AT1G75295
chr1	28256600	28257199	248	182	9.64972e-10	1.49742	4.16183e-09	AT1G75300
chr5	22261400	22261999	372	273	1.11588e-13	1.49742	9.05966e-13	AT5G54800
chr5	17703000	17703999	793	582	6.49719e-27	1.49732	3.61645e-25	AT5G44000
chr3	3786400	3786999	312	229	9.01854e-12	1.49721	5.4097e-11	AT3G11960
chr4	13679800	13680799	470	345	9.31972e-17	1.49707	1.20065e-15	AT4G27320
chr5	7990200	7990599	158	116	7.61333e-07	1.4968	2.02164e-06	AT5G23690
chr3	20244600	20245399	380	279	6.61479e-14	1.49673	5.54406e-13	AT3G54680
chr1	17718400	17719199	434	319	1.54446e-15	1.49508	1.68176e-14	AT1G48030
chr3	19031000	19031599	321	236	5.61245e-12	1.49471	3.46431e-11	AT3G51260
chr1	962000	962799	510	375	6.88281e-18	1.49453	1.05557e-16	AT1G03830
chr4	11794200	11794799	340	250	1.43888e-12	1.49453	9.72183e-12	AT4G22320
chr4	15636400	15637599	654	481	2.36386e-22	1.49416	7.05616e-21	AT4G32390
chr2	6367000	6367399	174	128	2.62e-07	1.49384	7.52747e-07	AT2G14835
chr5	26767800	26768599	560	412	2.11272e-19	1.49367	4.05098e-18	AT5G67070
chr3	15502000	15503599	1071	788	3.1675e-35	1.49358	5.03738e-33	AT3G43580
chr1	10774800	10775399	318	234	7.67e-12	1.4934	4.64347e-11	AT1G30460
chr1	29019000	29019599	216	159	1.27469e-08	1.49287	4.55678e-08	AT1G77230
chr1	29019000	29019599	216	159	1.27469e-08	1.49287	4.55678e-08	AT1G77240
chr4	6622400	6623399	710	523	6.22245e-24	1.49184	2.28217e-22	AT4G10760
chr5	8132800	8133399	319	235	8.05949e-12	1.49172	4.86836e-11	AT5G24060
chr4	6100600	6101599	642	473	8.12427e-22	1.49155	2.26439e-20	AT4G09649
chr4	6100600	6101599	642	473	8.12427e-22	1.49155	2.26439e-20	AT4G09650
chr4	9177400	9177999	323	238	6.19816e-12	1.49139	3.79244e-11	AT4G16210
chr5	17224400	17224799	171	126	3.59952e-07	1.49139	1.0119e-06	AT5G42950
chr2	1166400	1166999	213	157	1.747e-08	1.49089	6.10563e-08	AT2G03820
chr5	6967400	6967999	331	244	3.66626e-12	1.49074	2.33223e-11	AT5G20600
chr5	15769800	15770199	217	160	1.34023e-08	1.49041	4.76943e-08	AT5G39410
chr1	22208200	22208799	415	306	9.46965e-15	1.49036	9.13887e-14	AT1G60220
chr1	8097000	8097599	457	337	4.84908e-16	1.49022	5.62999e-15	AT1G22880
chr5	8365600	8366399	461	340	3.73451e-16	1.49	4.40073e-15	AT5G24490
chr5	1855200	1855799	301	222	3.30925e-11	1.48997	1.80068e-10	AT5G06130
chr2	11856800	11857799	545	402	9.90636e-19	1.48982	1.71369e-17	AT2G27820
chr2	4305200	4305799	263	194	5.08581e-10	1.48977	2.30647e-09	AT2G10931
chr3	6223200	6223599	225	166	7.88987e-09	1.4895	2.91746e-08	AT3G18165
chr1	19963200	19964999	1027	758	2.11686e-33	1.4889	2.82123e-31	AT1G53480
chr1	19963200	19964999	1027	758	2.11686e-33	1.4889	2.82123e-31	AT1G53490
chr3	21150800	21151599	504	372	2.01496e-17	1.48885	2.88232e-16	AT3G57140
chr3	20381000	20381999	401	296	2.97118e-14	1.48873	2.63989e-13	AT3G55000
chr1	10655000	10655599	275	203	2.30549e-10	1.48868	1.10097e-09	AT1G30270
chr3	4630000	4630599	256	189	9.05605e-10	1.48848	3.92008e-09	AT3G13990
chr3	19801600	19802399	516	381	9.21178e-18	1.4883	1.38031e-16	AT3G53410
chr5	9722600	9722999	172	127	3.78544e-07	1.4883	1.0607e-06	AT5G27540
chr3	18409000	18409599	367	271	3.4579e-13	1.4882	2.58761e-12	AT3G49650
chr4	17725600	17727799	807	596	1.28062e-26	1.48796	6.78875e-25	AT4G37740
chr3	19332800	19333599	482	356	1.06178e-16	1.48786	1.35589e-15	AT3G52140
chr1	3913600	3915199	616	455	8.68585e-21	1.48776	2.04198e-19	AT1G11630
chr1	3913600	3915199	616	455	8.68585e-21	1.48776	2.04198e-19	AT1G11640
chr1	3913600	3915199	616	455	8.68585e-21	1.48776	2.04198e-19	AT1G11650
chr1	7626400	7626799	199	147	5.58011e-08	1.48765	1.78807e-07	AT1G21720
chr2	14845200	14846399	743	549	1.28163e-24	1.48724	5.1606e-23	AT2G35240
chr4	5390800	5391599	429	317	4.75753e-15	1.48718	4.81477e-14	AT4G08480
chr5	18689800	18690399	387	286	9.32494e-14	1.487	7.65948e-13	AT5G46080
chr1	8648200	8648599	207	153	3.27955e-08	1.48677	1.09174e-07	AT1G24388
chr1	8648200	8648599	207	153	3.27955e-08	1.48677	1.09174e-07	AT1G24390
chr2	9744600	9746199	621	459	7.01954e-21	1.48677	1.68585e-19	AT2G22900
chr3	17309000	17309999	552	408	8.80885e-19	1.48677	1.53083e-17	AT3G46980
chr4	15243800	15244599	276	204	2.42037e-10	1.48677	1.15263e-09	AT4G31410
chr3	20451600	20452599	625	462	5.41026e-21	1.48663	1.31606e-19	AT3G55160
chr5	5180800	5181399	491	363	6.60521e-17	1.48641	8.75375e-16	AT5G15860
chr3	4707400	4708799	610	451	1.60747e-20	1.48634	3.61298e-19	AT3G14180
chr5	19864400	19865399	591	437	6.19948e-20	1.48618	1.27805e-18	AT5G49000
chr1	23595000	23595999	522	386	7.8042e-18	1.4861	1.18345e-16	AT1G63640
chr2	15450800	15451399	361	267	6.43142e-13	1.4858	4.60517e-12	AT2G36835
chr5	4274000	4274599	265	196	5.60642e-10	1.48578	2.52502e-09	AT5G13330
chr1	18511800	18512599	373	276	2.92743e-13	1.48513	2.20988e-12	AT1G49980
chr5	24902600	24903199	350	259	1.48252e-12	1.48502	9.99173e-12	AT5G61990
chr2	16666000	16666799	677	501	1.83421e-22	1.48496	5.5451e-21	AT2G39930
chr1	23489800	23490199	177	131	3.0454e-07	1.4848	8.65378e-07	AT1G63330
chr5	1656400	1657199	431	319	5.23142e-15	1.48474	5.23834e-14	AT5G05570
chr4	775600	776399	566	419	4.42658e-19	1.48446	8.10968e-18	AT4G01800
chr1	13156400	13156999	262	194	7.66065e-10	1.4841	3.37472e-09	AT1G35620
chr3	18370600	18371199	393	291	7.89027e-14	1.4841	6.54927e-13	AT3G49560
chr2	6934800	6935399	239	177	3.92962e-09	1.48385	1.52175e-08	AT2G15910
chr1	761000	762199	744	551	2.10068e-24	1.48384	8.14659e-23	AT1G03160
chr5	22121400	22121799	266	197	5.88208e-10	1.48382	2.63788e-09	AT5G54490
chr5	20190000	20191399	852	631	1.20506e-27	1.4838	7.47732e-26	AT5G49690
chr1	26661600	26663199	829	614	5.99994e-27	1.48372	3.3694e-25	AT1G70710
chr1	23266200	23267199	833	617	4.62698e-27	1.48363	2.6296e-25	AT1G62830
chr4	13847600	13848399	467	346	4.96705e-16	1.48322	5.75989e-15	AT4G27780
chr3	10318600	10319199	440	326	3.24861e-15	1.4832	3.37988e-14	AT3G27830
chr5	3918200	3918799	251	186	1.77616e-09	1.48295	7.32169e-09	AT5G12120
chr1	28705200	28706399	896	664	6.91985e-29	1.48288	5.17621e-27	AT1G76500
chr5	25756400	25757199	452	335	1.4817e-15	1.48272	1.61713e-14	AT5G64420
chr3	15015200	15015999	340	252	3.58422e-12	1.48267	2.28312e-11	AT3G42950
chr1	3326000	3326999	379	281	2.47439e-13	1.48217	1.89586e-12	AT1G10150
chr5	8458000	8458599	263	195	8.03425e-10	1.48213	3.52126e-09	AT5G24690
chr5	26564400	26567799	1640	1216	5.61971e-51	1.48209	8.181e-48	AT5G66558
chr5	26564400	26567799	1640	1216	5.61971e-51	1.48209	8.181e-48	AT5G66560
chr5	26564400	26567799	1640	1216	5.61971e-51	1.48209	8.181e-48	AT5G66562
chr5	26564400	26567799	1640	1216	5.61971e-51	1.48209	8.181e-48	AT5G66564
chr5	26564400	26567799	1640	1216	5.61971e-51	1.48209	8.181e-48	AT5G66567
chr1	22021800	22022399	271	201	4.73615e-10	1.48162	2.15876e-09	AT1G59830
chr5	19541400	19542399	515	382	2.15781e-17	1.48152	3.07272e-16	AT5G48180
chr3	41000	41999	550	408	1.96482e-18	1.48138	3.25321e-17	AT3G01120
chr1	4529000	4529999	744	552	3.27659e-24	1.48115	1.24767e-22	AT1G13250
chr4	18059000	18059599	279	207	2.79277e-10	1.48115	1.31639e-09	AT4G38630
chr1	19850200	19851799	1151	854	2.59785e-36	1.48109	5.34395e-34	AT1G53230
chr1	19850200	19851799	1151	854	2.59785e-36	1.48109	5.34395e-34	AT1G53233
chr3	16471600	16472399	469	348	5.45063e-16	1.48101	6.28983e-15	AT3G45030
chr5	19559200	19559999	504	374	4.94848e-17	1.48089	6.65128e-16	AT5G48240
chr3	21684600	21685999	857	636	1.51633e-27	1.48077	9.22719e-26	AT3G58630
chr5	13711600	13712199	264	196	8.42202e-10	1.48017	3.67082e-09	AT5G35530
chr4	7287800	7288999	761	565	1.21129e-24	1.48013	4.9087e-23	AT4G12240
chr1	30279400	30280399	672	499	5.5341e-22	1.4799	1.5773e-20	AT1G80530
chr1	17424800	17425599	303	225	5.73571e-11	1.47987	3.00688e-10	AT1G47490
chr3	6170400	6171599	544	404	3.63052e-18	1.47973	5.79811e-17	AT3G18035
chr4	6083600	6084399	408	303	4.13271e-14	1.47973	3.57783e-13	AT4G09630
chr5	657800	658599	517	384	2.36558e-17	1.47953	3.35597e-16	AT5G02870
chr1	12429800	12430799	568	422	7.58011e-19	1.47911	1.32951e-17	AT1G34130
chr2	18656000	18656599	323	240	1.53627e-11	1.47896	8.8451e-11	AT2G45240
chr1	4614400	4615199	366	272	8.12788e-13	1.47869	5.71928e-12	AT1G13450
chr2	13697600	13698199	366	272	8.12788e-13	1.47869	5.71928e-12	AT2G32260
chr5	6795400	6795999	331	246	9.07387e-12	1.47862	5.43427e-11	AT5G20120
chr1	6194800	6196199	853	634	3.05718e-27	1.47851	1.79125e-25	AT1G18000
chr5	4639000	4639799	421	313	1.9705e-14	1.4781	1.80589e-13	AT5G14390
chr5	172600	173599	706	525	7.54031e-23	1.47778	2.41456e-21	AT5G01410
chr1	7573000	7574599	905	673	1.0417e-28	1.47774	7.49589e-27	AT1G21600
chr1	7573000	7574599	905	673	1.0417e-28	1.47774	7.49589e-27	AT1G21610
chr3	9122600	9123399	394	293	1.29342e-13	1.47772	1.04161e-12	AT3G25030
chr3	6609800	6610999	722	537	2.66057e-23	1.4775	8.91174e-22	AT3G19120
chr5	13233400	13234399	559	416	1.90022e-18	1.47667	3.15176e-17	AT5G34930
chr2	18296600	18297599	595	443	1.81285e-19	1.47597	3.50799e-18	AT2G44255
chr2	18296600	18297599	595	443	1.81285e-19	1.47597	3.50799e-18	AT2G44260
chr5	2124000	2124399	188	140	2.06027e-07	1.47569	6.01057e-07	AT5G06839
chr5	1744600	1745199	302	225	8.57125e-11	1.47499	4.37816e-10	AT5G05800
chr5	9836000	9836399	208	155	5.42852e-08	1.47467	1.74393e-07	AT5G27770
chr1	18470000	18470999	679	506	7.57996e-22	1.47463	2.11579e-20	AT1G49890
chr5	18501600	18501999	161	120	1.40767e-06	1.47438	3.57873e-06	AT5G45620
chr5	19763000	19763799	377	281	5.50736e-13	1.47435	3.98725e-12	AT5G48730
chr4	4195600	4196199	216	161	3.18733e-08	1.47432	1.06441e-07	AT4G07390
chr5	5551600	5552399	432	322	1.33572e-14	1.47432	1.25952e-13	AT5G16890
chr3	1671800	1672599	330	246	1.35377e-11	1.47416	7.85168e-11	AT3G05680
chr2	6154600	6154999	232	173	1.1005e-08	1.47369	3.97309e-08	AT2G14460
chr4	13240200	13241199	610	455	9.46644e-20	1.47327	1.89379e-18	AT4G26130
chr3	2252000	2252799	378	282	5.75936e-13	1.47302	4.14906e-12	AT3G07110
chr3	4122200	4123199	386	288	3.40523e-13	1.47285	2.55123e-12	AT3G12920
chr3	3298000	3298599	327	244	1.84277e-11	1.47273	1.04352e-10	AT3G10550
chr3	5703000	5703599	335	250	1.08798e-11	1.47255	6.42036e-11	AT3G16760
chr4	8428800	8429799	808	603	1.90131e-25	1.47251	8.58766e-24	AT4G14713
chr3	10782200	10782999	406	303	9.16029e-14	1.47248	7.53733e-13	AT3G28720
chr5	20167200	20169399	1171	874	6.32142e-36	1.47235	1.17287e-33	AT5G49665
chr5	22695000	22697799	1585	1183	7.27207e-48	1.47234	8.09552e-45	AT5G56040
chr2	8644400	8645399	860	642	6.45532e-27	1.47207	3.60374e-25	AT2G20020
chr1	12420400	12421599	434	324	1.45986e-14	1.47201	1.36704e-13	AT1G34110
chr4	12590000	12590599	367	274	1.32497e-12	1.47191	8.99713e-12	AT4G24280
chr3	267800	268599	446	333	6.64847e-15	1.47182	6.55666e-14	AT3G01740
chr5	16284400	16286399	750	560	1.03076e-23	1.47176	3.65301e-22	AT5G40660
chr5	16284400	16286399	750	560	1.03076e-23	1.47176	3.65301e-22	AT5G40670
chr5	24317200	24317999	229	171	1.50213e-08	1.47165	5.29677e-08	AT5G60460
chr1	28095800	28096599	766	572	3.63668e-24	1.47163	1.371e-22	AT1G74780
chr3	5438000	5438799	383	286	4.62946e-13	1.47163	3.39715e-12	AT3G16020
chr5	22156400	22157199	308	230	7.20298e-11	1.47159	3.7301e-10	AT5G54540
chr5	23473400	23474199	308	230	7.20298e-11	1.47159	3.7301e-10	AT5G57990
chr1	1435400	1437599	1548	1156	1.1055e-46	1.47156	9.09631e-44	AT1G05020
chr5	20820000	20820799	474	354	1.06216e-15	1.47143	1.18105e-14	AT5G51210
chr3	7703000	7703399	162	121	1.47456e-06	1.47128	3.73474e-06	AT3G21865
chr3	22041800	22042599	257	192	2.34348e-09	1.47095	9.46242e-09	AT3G59670
chr3	22359400	22360199	518	387	5.96745e-17	1.4709	7.96431e-16	AT3G60510
chr2	10562600	10563199	269	201	1.05863e-09	1.47069	4.53578e-09	AT2G24765
chr3	20256600	20257999	1164	870	1.70947e-35	1.47027	2.88855e-33	AT3G54720
chr3	9180200	9180999	531	397	2.84396e-17	1.46984	3.98681e-16	AT3G25210
chr5	8489200	8490199	464	347	2.54369e-15	1.46944	2.68186e-14	AT5G24740
chr4	17658800	17660599	948	709	3.25841e-29	1.46936	2.50672e-27	AT4G37580
chr3	4564400	4565199	476	356	1.15911e-15	1.46934	1.28357e-14	AT3G13860
chr4	17805000	17806599	718	537	1.27885e-22	1.46931	3.94815e-21	AT4G37870
chr5	6595600	6596599	615	460	1.17732e-19	1.4692	2.3282e-18	AT5G19540
chr1	17170800	17171599	631	472	4.14411e-20	1.4691	8.71414e-19	AT1G45230
chr1	30080000	30080599	254	190	3.19409e-09	1.46908	1.25698e-08	AT1G79960
chr2	8169600	8170199	258	193	2.4502e-09	1.46902	9.86597e-09	AT2G18876
chr1	30188400	30189399	532	398	2.96986e-17	1.4689	4.14183e-16	AT1G80290
chr5	21780800	21781599	405	303	1.35888e-13	1.46885	1.08969e-12	AT5G53620
chr5	24660400	24661199	457	342	4.48684e-15	1.46844	4.56279e-14	AT5G61330
chr1	5852000	5852799	465	348	2.65641e-15	1.46838	2.79603e-14	AT1G17120
chr3	7207800	7208399	310	232	7.86855e-11	1.46838	4.05424e-10	AT3G20630
chr2	6908800	6909399	350	262	5.63517e-12	1.46802	3.47606e-11	AT2G15860
chr4	18138600	18139199	366	274	1.96626e-12	1.4679	1.29974e-11	AT4G38890
chr4	14144200	14147399	1500	1123	9.01649e-45	1.46783	4.87534e-42	AT4G28650
chr4	14144200	14147399	1500	1123	9.01649e-45	1.46783	4.87534e-42	AT4G28652
chr5	7390000	7390599	203	152	1.06013e-07	1.46763	3.24275e-07	AT5G22320
chr2	15914000	15914599	207	155	8.11847e-08	1.46759	2.53096e-07	AT2G38020
chr5	170800	171199	207	155	8.11847e-08	1.46759	2.53096e-07	AT5G01400
chr1	2723800	2724599	418	313	6.45523e-14	1.46756	5.41513e-13	AT1G08600
chr3	137800	139999	1521	1139	2.57263e-45	1.46747	1.52147e-42	AT3G01360
chr3	137800	139999	1521	1139	2.57263e-45	1.46747	1.52147e-42	AT3G01370
chr5	3343200	3343799	227	170	2.14296e-08	1.46738	7.38717e-08	AT5G10572
chr1	20420200	20420999	259	194	2.56061e-09	1.46711	1.02473e-08	AT1G54710
chr1	8769600	8770599	542	406	1.91824e-17	1.46703	2.75021e-16	AT1G24800
chr5	21955400	21956599	818	613	2.9223e-25	1.46642	1.2743e-23	AT5G54100
chr5	20484200	20484999	519	389	9.61868e-17	1.46616	1.2358e-15	AT5G50320
chr1	8168600	8169199	236	177	1.31548e-08	1.46522	4.68931e-08	AT1G23050
chr1	8168600	8169199	236	177	1.31548e-08	1.46522	4.68931e-08	AT1G23052
chr1	12746400	12747199	392	294	4.42362e-13	1.46522	3.25494e-12	AT1G34770
chr2	2329000	2329599	248	186	5.92881e-09	1.46522	2.23868e-08	AT2G06000
chr3	9007000	9007599	312	234	8.58266e-11	1.46522	4.38162e-10	AT3G24670
chr3	17586000	17586599	284	213	5.45898e-10	1.46522	2.46272e-09	AT3G47700
chr5	6378200	6378999	452	339	8.6211e-15	1.46522	8.3626e-14	AT5G19080
chr5	25349000	25349599	280	210	7.11279e-10	1.46522	3.15097e-09	AT5G63200
chr5	17810400	17811199	637	478	5.34951e-20	1.46446	1.11252e-18	AT5G44220
chr1	127600	128399	493	370	6.54376e-16	1.46423	7.48282e-15	AT1G01320
chr5	20329200	20329999	457	343	6.9199e-15	1.46415	6.78896e-14	AT5G49970
chr2	10567000	10567799	301	226	1.97887e-10	1.4636	9.55358e-10	AT2G24790
chr1	2215200	2215999	586	440	1.66373e-18	1.46356	2.7938e-17	AT1G07210
chr1	17081800	17082399	273	205	1.26105e-09	1.46344	5.32117e-09	AT1G45150
chr4	11849800	11850399	257	193	3.64111e-09	1.46332	1.41874e-08	AT4G22490
chr3	19554000	19554799	523	393	1.13859e-16	1.46243	1.44616e-15	AT3G52760
chr4	17895400	17896399	487	366	1.20177e-15	1.46222	1.32229e-14	AT4G38130
chr4	17895400	17896399	487	366	1.20177e-15	1.46222	1.32229e-14	AT4G38120
chr5	23207400	23207799	157	118	2.8913e-06	1.46212	6.98912e-06	AT5G57290
chr4	9365600	9366599	733	551	1.56703e-22	1.4619	4.78324e-21	AT4G16630
chr1	12104000	12104599	282	212	7.74922e-10	1.46177	3.40897e-09	AT1G33390
chr1	20790400	20791199	375	282	1.87057e-12	1.46133	1.24082e-11	AT1G55620
chr1	18087400	18087799	238	179	1.43397e-08	1.46113	5.07343e-08	AT1G48900
chr3	6342000	6342399	210	158	9.2537e-08	1.46059	2.86107e-07	AT3G18485
chr2	7313800	7314599	501	377	5.95147e-16	1.46036	6.83859e-15	AT2G16880
chr2	7313800	7314599	501	377	5.95147e-16	1.46036	6.83859e-15	AT2G16881
chr1	18198200	18199199	485	365	1.697e-15	1.4602	1.83309e-14	AT1G49200
chr3	20478200	20480199	659	496	2.41552e-20	1.46005	5.29706e-19	AT3G55250
chr2	7939800	7940599	469	353	4.84132e-15	1.46003	4.88911e-14	AT2G18250
chr3	19950600	19951999	821	618	7.76768e-25	1.45989	3.23796e-23	AT3G53860
chr3	19950600	19951999	821	618	7.76768e-25	1.45989	3.23796e-23	AT3G53870
chr3	1070400	1071199	453	341	1.38193e-14	1.45985	1.29663e-13	AT3G04080
chr1	25367800	25369799	902	679	4.43789e-27	1.45983	2.52973e-25	AT1G67680
chr1	25367800	25369799	902	679	4.43789e-27	1.45983	2.52973e-25	AT1G67690
chr1	8129600	8130399	534	402	7.63887e-17	1.45975	9.99762e-16	AT1G22960
chr1	19118400	19119399	445	335	2.33531e-14	1.45975	2.11261e-13	AT1G51550
chr1	19842600	19843399	530	399	9.92367e-17	1.45971	1.27412e-15	AT1G53200
chr1	7003600	7004399	352	265	9.46679e-12	1.45969	5.65348e-11	AT1G20200
chr1	13698000	13698599	259	195	3.96448e-09	1.45959	1.534e-08	AT1G36370
chr3	3707400	3708599	514	387	2.82725e-16	1.45954	3.37151e-15	AT3G11720
chr1	937800	938999	684	515	5.25862e-21	1.45953	1.28412e-19	AT1G03750
chr5	19846000	19846599	417	314	1.46686e-13	1.45939	1.16689e-12	AT5G48950
chr2	19593400	19596599	1664	1253	4.25716e-48	1.45938	5.03542e-45	AT2G47830
chr2	19593400	19596599	1664	1253	4.25716e-48	1.45938	5.03542e-45	AT2G47840
chr2	19593400	19596599	1664	1253	4.25716e-48	1.45938	5.03542e-45	AT2G47844
chr2	19593400	19596599	1664	1253	4.25716e-48	1.45938	5.03542e-45	AT2G47850
chr5	17368000	17368599	332	250	3.5373e-11	1.45936	1.91705e-10	AT5G43280
chr5	20794600	20796199	660	497	2.51636e-20	1.45933	5.49275e-19	AT5G51170
chr5	20794600	20796199	660	497	2.51636e-20	1.45933	5.49275e-19	AT5G51174
chr2	7545600	7546799	567	427	9.81993e-18	1.45922	1.46217e-16	AT2G17350
chr2	7545600	7546799	567	427	9.81993e-18	1.45922	1.46217e-16	AT2G17360
chr1	373600	373999	158	119	3.02018e-06	1.45907	7.28299e-06	AT1G02080
chr3	6312800	6314399	1025	772	2.05104e-30	1.45905	1.81383e-28	AT3G18380
chr3	6312800	6314399	1025	772	2.05104e-30	1.45905	1.81383e-28	AT3G18390
chr5	10880800	10881399	312	235	1.32396e-10	1.45899	6.54888e-10	AT5G28850
chr2	17512400	17513799	969	730	7.80981e-29	1.4587	5.751e-27	AT2G41945
chr2	17512400	17513799	969	730	7.80981e-29	1.4587	5.751e-27	AT2G41950
chr1	19021000	19021799	653	492	4.41729e-20	1.45852	9.23726e-19	AT1G51310
chr1	5137000	5137799	714	538	9.19044e-22	1.45841	2.53911e-20	AT1G14890
chr1	5326200	5327399	706	532	1.54823e-21	1.45834	4.10368e-20	AT1G15500
chr1	7052800	7053799	702	529	2.00953e-21	1.4583	5.24558e-20	AT1G20370
chr5	16537000	16537799	349	263	1.28422e-11	1.45826	7.49196e-11	AT5G41330
chr2	10778600	10779199	268	202	2.43223e-09	1.45797	9.80194e-09	AT2G25310
chr3	22329000	22329799	467	352	6.83114e-15	1.45794	6.71232e-14	AT3G60400
chr5	14237400	14237999	321	242	8.1377e-11	1.45765	4.17813e-10	AT5G36170
chr3	1371600	1372599	630	475	2.20306e-19	1.45751	4.20715e-18	AT3G04950
chr1	8682200	8682799	439	331	4.28474e-14	1.45748	3.70438e-13	AT1G24490
chr1	12465600	12465999	179	135	8.21419e-07	1.45708	2.16781e-06	AT1G34220
chr2	13389800	13390599	411	310	2.69279e-13	1.45695	2.04663e-12	AT2G31400
chr5	7943000	7943999	525	396	1.89292e-16	1.4569	2.3353e-15	AT5G23570
chr4	7002800	7003599	403	304	4.55464e-13	1.45679	3.34354e-12	AT4G11560
chr1	5302600	5303399	460	347	1.20207e-14	1.45678	1.1426e-13	AT1G15420
chr4	1247400	1248199	452	341	2.03116e-14	1.45663	1.85789e-13	AT4G02790
chr3	1595400	1596199	493	372	1.53772e-15	1.45636	1.67538e-14	AT3G05510
chr1	29292200	29292799	432	326	7.54351e-14	1.45623	6.28349e-13	AT1G77890
chr2	1846200	1846999	530	400	1.51708e-16	1.45606	1.90137e-15	AT2G05120
chr1	17176000	17176799	632	477	2.38785e-19	1.45601	4.54172e-18	AT1G45332
chr1	8835400	8836199	363	274	6.3241e-12	1.45586	3.867e-11	AT1G25211
chr5	23241400	23241999	306	231	2.43911e-10	1.45571	1.16068e-09	AT5G57360
chr2	18202000	18202799	453	342	2.11501e-14	1.45558	1.92807e-13	AT2G43950
chr1	6168200	6168799	245	185	1.24655e-08	1.45532	4.46293e-08	AT1G17930
chr3	8178800	8179999	686	518	8.69619e-21	1.45532	2.03935e-19	AT3G23020
chr4	6704000	6704599	392	296	1.04379e-12	1.45532	7.20675e-12	AT4G10925
chr3	4128400	4129199	527	398	2.05168e-16	1.4551	2.51477e-15	AT3G12930
chr1	29629600	29630599	801	605	6.63418e-24	1.45493	2.42378e-22	AT1G78810
chr3	19809800	19811799	1083	818	1.35325e-31	1.45492	1.37689e-29	AT3G53430
chr3	19809800	19811799	1083	818	1.35325e-31	1.45492	1.37689e-29	AT3G53440
chr4	6463800	6464599	462	349	1.3031e-14	1.45473	1.23244e-13	AT4G10450
chr3	4954800	4955599	446	337	3.72086e-14	1.45435	3.24803e-13	AT3G14750
chr2	8438600	8438999	176	133	1.12064e-06	1.45421	2.8953e-06	AT2G19480
chr1	3822200	3823599	651	492	9.47244e-20	1.45405	1.89299e-18	AT1G11360
chr1	11458600	11459399	299	226	4.31082e-10	1.45388	1.97919e-09	AT1G31910
chr4	16757400	16757999	295	223	5.61607e-10	1.45372	2.52877e-09	AT4G35230
chr5	2002200	2003199	590	446	4.57592e-18	1.45372	7.2106e-17	AT5G06550
chr5	26937800	26938399	250	189	9.95682e-09	1.45359	3.62023e-08	AT5G67510
chr5	4826800	4827799	488	369	2.92855e-15	1.45331	3.06373e-14	AT5G14920
chr5	6677000	6677799	394	298	1.13113e-12	1.45293	7.77293e-12	AT5G19750
chr1	24025600	24026399	382	289	2.48997e-12	1.45255	1.6149e-11	AT1G64650
chr4	7537000	7537599	226	171	4.91337e-08	1.45237	1.5876e-07	AT4G12850
chr2	10904600	10905199	374	283	4.21466e-12	1.45228	2.65521e-11	AT2G25620
chr1	22864600	22866599	1114	843	3.74729e-32	1.45219	4.00664e-30	AT1G61860
chr1	22864600	22866599	1114	843	3.74729e-32	1.45219	4.00664e-30	AT1G61870
chr1	669200	669799	296	224	5.84726e-10	1.45214	2.62475e-09	AT1G02960
chr2	17495600	17495999	222	168	6.41401e-08	1.45214	2.03461e-07	AT2G41905
chr5	6229800	6230599	325	246	9.57263e-11	1.45182	4.85819e-10	AT5G18680
chr3	18699800	18700599	461	349	1.90842e-14	1.45158	1.75452e-13	AT3G50380
chr4	13315400	13316199	461	349	1.90842e-14	1.45158	1.75452e-13	AT4G26310
chr5	17628800	17629199	177	134	1.1681e-06	1.45155	3.00848e-06	AT5G43850
chr3	3094000	3094799	387	293	1.99161e-12	1.45147	1.31558e-11	AT3G10030
chr5	22375600	22376199	350	265	2.04667e-11	1.4514	1.15175e-10	AT5G55130
chr5	1694600	1695399	453	343	3.22455e-14	1.45134	2.84232e-13	AT5G05660
chr3	6168000	6168799	515	390	6.84945e-16	1.45113	7.80879e-15	AT3G18030
chr5	4013400	4014199	408	309	5.56539e-13	1.451	4.02158e-12	AT5G12400
chr5	15551200	15551799	268	203	3.73356e-09	1.45079	1.45296e-08	AT5G38840
chr3	10073200	10073999	602	456	3.17564e-18	1.45076	5.1148e-17	AT3G27270
chr2	15635800	15636399	334	253	5.87628e-11	1.45074	3.07758e-10	AT2G37220
chr4	18219600	18220199	334	253	5.87628e-11	1.45074	3.07758e-10	AT4G39100
chr1	2535200	2535999	528	400	3.24827e-16	1.45057	3.84449e-15	AT1G08110
chr4	12763000	12763799	524	397	4.21989e-16	1.45046	4.94191e-15	AT4G24760
chr2	8978400	8980399	1403	1063	1.03838e-39	1.4504	3.22153e-37	AT2G20860
chr2	8978400	8980399	1403	1063	1.03838e-39	1.4504	3.22153e-37	AT2G20850
chr3	17636400	17636999	293	222	7.92887e-10	1.45037	3.48153e-09	AT3G47800
chr1	18187000	18187599	227	172	5.11646e-08	1.45031	1.64956e-07	AT1G49180
chr3	547000	547599	256	194	8.27657e-09	1.45012	3.04499e-08	AT3G02580
chr1	6760000	6760999	760	576	1.98743e-22	1.44996	5.97966e-21	AT1G19520
chr3	1466600	1467399	500	379	2.0298e-15	1.44976	2.16783e-14	AT3G05170
chr2	17836800	17837399	389	295	2.1546e-12	1.44908	1.41534e-11	AT2G42870
chr3	17763000	17763799	596	452	5.78635e-18	1.44901	9.02032e-17	AT3G48110
chr3	1312600	1315199	1337	1014	9.20425e-38	1.44897	2.12427e-35	AT3G04780
chr3	1312600	1315199	1337	1014	9.20425e-38	1.44897	2.12427e-35	AT3G04790
chr3	1312600	1315199	1337	1014	9.20425e-38	1.44897	2.12427e-35	AT3G04800
chr5	7242200	7243799	1131	858	3.15211e-32	1.44857	3.40878e-30	AT5G21930
chr5	7242200	7243799	1131	858	3.15211e-32	1.44857	3.40878e-30	AT5G21920
chr5	7296000	7296399	174	132	1.59198e-06	1.44857	4.00801e-06	AT5G22030
chr1	2941400	2942399	663	503	9.96905e-20	1.44847	1.98594e-18	AT1G09130
chr1	2012400	2013599	891	676	8.14209e-26	1.44842	3.83306e-24	AT1G06570
chr5	2955800	2956599	452	343	4.71217e-14	1.44813	4.05723e-13	AT5G09510
chr5	25321400	25322199	535	406	2.80885e-16	1.44808	3.35166e-15	AT5G63120
chr3	45000	45599	365	277	1.04485e-11	1.44803	6.1909e-11	AT3G01130
chr4	8722400	8722999	278	211	2.3787e-09	1.44786	9.59438e-09	AT4G15290
chr5	4615400	4616199	349	265	2.99683e-11	1.44725	1.64439e-10	AT5G14310
chr5	26660600	26662199	1126	855	5.93598e-32	1.44723	6.20654e-30	AT5G66770
chr5	1381800	1382199	187	142	7.40631e-07	1.44716	1.97137e-06	AT5G04770
chr3	413000	413599	291	221	1.11779e-09	1.44699	4.77307e-09	AT3G02220
chr3	9951400	9951999	312	237	3.09824e-10	1.44667	1.4517e-09	AT3G26990
chr2	9028400	9028999	233	177	4.24503e-08	1.4466	1.38896e-07	AT2G21045
chr4	6299200	6299799	254	193	1.16822e-08	1.44624	4.20395e-08	AT4G10070
chr4	15713800	15714399	329	250	1.12016e-10	1.44617	5.61713e-10	AT4G32560
chr1	23412800	23413599	400	304	1.43029e-12	1.44594	9.67068e-12	AT1G63130
chr4	13769200	13769999	546	415	1.86705e-16	1.4458	2.30489e-15	AT4G27585
chr3	14094600	14095599	496	377	3.99719e-15	1.44579	4.09345e-14	AT3G33520
chr3	21779400	21781399	1138	865	4.10593e-32	1.44574	4.36543e-30	AT3G58930
chr3	21779400	21781399	1138	865	4.10593e-32	1.44574	4.36543e-30	AT3G58940
chr5	8966800	8968399	617	469	2.46448e-18	1.4457	4.03813e-17	AT5G25757
chr5	8966800	8968399	617	469	2.46448e-18	1.4457	4.03813e-17	AT5G25760
chr2	16864600	16865399	459	349	4.06719e-14	1.44528	3.52273e-13	AT2G40380
chr4	6302200	6302599	192	146	5.89466e-07	1.44515	1.59298e-06	AT4G10080
chr2	17177600	17178399	526	400	6.90348e-16	1.44508	7.86091e-15	AT2G41220
chr2	8762600	8763399	476	362	1.48083e-14	1.44498	1.38599e-13	AT2G20310
chr3	6199400	6201199	1044	794	1.49207e-29	1.44492	1.1965e-27	AT3G18090
chr3	6199400	6201199	1044	794	1.49207e-29	1.44492	1.1965e-27	AT3G18100
chr3	18129600	18129999	213	162	1.60991e-07	1.44487	4.78824e-07	AT3G48890
chr5	8724000	8724599	347	264	4.21258e-11	1.44441	2.25653e-10	AT5G25210
chr3	6920800	6921599	439	334	1.50925e-13	1.44438	1.19809e-12	AT3G19895
chr5	17686800	17688599	878	668	3.89163e-25	1.44438	1.67005e-23	AT5G43950
chr1	1944400	1945999	1154	878	2.18847e-32	1.44436	2.48005e-30	AT1G06380
chr3	10355000	10356399	699	532	2.17508e-20	1.44388	4.7976e-19	AT3G27906
chr3	5763600	5765399	670	510	1.29928e-19	1.44367	2.56135e-18	AT3G16870
chr4	7445400	7446399	658	501	2.84073e-19	1.44329	5.32813e-18	AT4G12570
chr1	27107600	27108799	591	450	1.65225e-17	1.44324	2.38329e-16	AT1G72010
chr5	3708200	3709199	696	530	2.92973e-20	1.44311	6.30059e-19	AT5G11550
chr1	5651400	5651799	214	163	1.67384e-07	1.44275	4.96122e-07	AT1G16530
chr3	19972800	19973799	718	547	8.57591e-21	1.44245	2.02874e-19	AT3G53940
chr1	2395400	2396799	882	672	4.51354e-25	1.44233	1.92385e-23	AT1G07725
chr1	2395400	2396799	882	672	4.51354e-25	1.44233	1.92385e-23	AT1G07728
chr2	6481400	6482399	798	608	7.0683e-23	1.44233	2.27883e-21	AT2G15000
chr3	1927000	1927799	441	336	1.62725e-13	1.44233	1.28422e-12	AT3G06350
chr5	5061400	5062199	458	349	5.91858e-14	1.44213	5.0116e-13	AT5G15550
chr1	20664400	20664999	328	250	1.63528e-10	1.44178	7.98856e-10	AT1G55350
chr1	19484200	19485399	715	545	1.15461e-20	1.4417	2.67128e-19	AT1G52320
chr1	30241600	30242599	652	497	5.15374e-19	1.44164	9.29785e-18	AT1G80440
chr1	9795800	9796399	366	279	1.64558e-11	1.44159	9.40296e-11	AT1G28090
chr3	23282600	23284599	1157	882	3.67096e-32	1.44155	3.94733e-30	AT3G62990
chr3	23282600	23284599	1157	882	3.67096e-32	1.44155	3.94733e-30	AT3G63000
chr4	12952400	12952799	181	138	1.3706e-06	1.44133	3.49387e-06	AT4G25315
chr5	6418400	6419199	362	276	2.14108e-11	1.44133	1.20166e-10	AT5G19130
chr5	20336200	20336599	160	122	5.06305e-06	1.4412	1.17223e-05	AT5G49980
chr1	5103800	5104799	716	546	1.19785e-20	1.44107	2.76119e-19	AT1G14810
chr5	21523400	21523999	257	196	1.31128e-08	1.44093	4.6752e-08	AT5G53090
chr5	7933400	7934399	822	627	2.22964e-23	1.44068	7.53501e-22	AT5G23530
chr2	16832600	16833399	565	431	1.1072e-16	1.44057	1.40724e-15	AT2G40300
chr2	12679200	12680399	759	579	9.89486e-22	1.44055	2.70999e-20	AT2G29660
chr2	9725800	9726399	350	267	4.71761e-11	1.44053	2.51142e-10	AT2G22830
chr3	2377800	2380199	1122	856	3.92904e-31	1.4404	3.68104e-29	AT3G07425
chr3	2377800	2380199	1122	856	3.92904e-31	1.4404	3.68104e-29	AT3G07430
chr1	10762800	10763399	270	206	6.1448e-09	1.44033	2.31516e-08	AT1G30450
chr1	19689200	19690399	540	412	5.11819e-16	1.44033	5.91703e-15	AT1G52880
chr4	5315000	5315399	173	132	2.346e-06	1.44025	5.75851e-06	AT4G08390
chr5	21826600	21827199	401	306	2.24568e-12	1.44008	1.46905e-11	AT5G53770
chr4	9141200	9141599	169	129	3.07039e-06	1.43967	7.39936e-06	AT4G16144
chr1	2211200	2212399	770	588	6.55815e-22	1.43906	1.84417e-20	AT1G07200
chr1	23299000	23299599	275	210	4.8946e-09	1.43906	1.87511e-08	AT1G62910
chr5	2667400	2668199	330	252	1.76221e-10	1.43906	8.5754e-10	AT5G08300
chr2	6187400	6188199	457	349	8.59436e-14	1.43898	7.10255e-13	AT2G14530
chr2	11112800	11113799	593	453	2.67518e-17	1.43854	3.77537e-16	AT2G26080
chr4	8937400	8937999	305	233	8.27524e-10	1.4385	3.61767e-09	AT4G15700
chr3	173200	173999	627	479	3.56859e-18	1.43846	5.70885e-17	AT3G01460
chr5	26558600	26559399	534	408	9.28702e-16	1.43829	1.04369e-14	AT5G66540
chr2	18618200	18619999	797	609	1.53477e-22	1.43815	4.69991e-21	AT2G45160
chr1	1576800	1577599	352	269	5.08023e-11	1.43799	2.68407e-10	AT1G05380
chr1	9405200	9406199	543	415	5.71034e-16	1.43786	6.57749e-15	AT1G27090
chr1	8898000	8899199	836	639	1.64713e-23	1.43771	5.6267e-22	AT1G25370
chr1	27576800	27577199	174	133	2.4378e-06	1.43768	5.9668e-06	AT1G73350
chr3	22410600	22412599	900	688	3.85935e-25	1.43754	1.65996e-23	AT3G60630
chr3	19860200	19860999	467	357	5.4747e-14	1.43752	4.66496e-13	AT3G53560
chr1	8624000	8624799	620	474	6.23286e-18	1.4374	9.63699e-17	AT1G24310
chr1	29852400	29853399	790	604	2.67609e-22	1.43732	7.92566e-21	AT1G79350
chr1	887200	887999	272	208	6.62092e-09	1.43704	2.47826e-08	AT1G03545
chr1	887200	887999	272	208	6.62092e-09	1.43704	2.47826e-08	AT1G03550
chr1	18839000	18839999	510	390	4.45726e-15	1.43704	4.53514e-14	AT1G50840
chr5	17927400	17928399	787	602	3.59707e-22	1.43662	1.04409e-20	AT5G44500
chr3	6820200	6821599	885	677	1.13023e-24	1.43655	4.59993e-23	AT3G19630
chr3	6820200	6821599	885	677	1.13023e-24	1.43655	4.59993e-23	AT3G19640
chr1	591800	593199	1081	827	1.13436e-29	1.43643	9.29336e-28	AT1G02720
chr1	13450200	13450799	230	176	8.75255e-08	1.43608	2.71633e-07	AT1G36050
chr2	11903400	11903999	311	238	6.83948e-10	1.43598	3.03772e-09	AT2G27950
chr5	3789400	3790199	375	287	1.52075e-11	1.43587	8.76374e-11	AT5G11760
chr1	9639000	9639799	388	297	7.16717e-12	1.43562	4.35437e-11	AT1G27695
chr5	7205600	7206199	307	235	8.90637e-10	1.43561	3.86412e-09	AT5G21170
chr3	22261600	22262399	371	284	1.97809e-11	1.43556	1.11448e-10	AT3G60240
chr4	5927200	5927599	209	160	3.19922e-07	1.43546	9.07044e-07	AT4G09340
chr3	6524200	6525399	730	559	1.32389e-20	1.43508	3.02227e-19	AT3G18930
chr2	11684200	11684999	380	291	1.21221e-11	1.43501	7.10028e-11	AT2G27310
chr4	10493200	10493799	252	193	2.4936e-08	1.43485	8.50142e-08	AT4G19190
chr2	13588600	13589199	218	167	1.94671e-07	1.43451	5.70478e-07	AT2G31960
chr4	17994000	17995999	1210	927	9.77962e-33	1.4344	1.18641e-30	AT4G38460
chr4	17994000	17995999	1210	927	9.77962e-33	1.4344	1.18641e-30	AT4G38440
chr4	897400	898199	402	308	3.50288e-12	1.4343	2.23281e-11	AT4G02040
chr1	5442600	5443599	479	367	3.74465e-14	1.43428	3.26729e-13	AT1G15800
chr1	22856000	22856799	385	295	9.6617e-12	1.43418	5.75898e-11	AT1G61850
chr3	9491800	9492599	475	364	4.86462e-14	1.43403	4.17141e-13	AT3G25920
chr5	25181400	25182399	565	433	2.49041e-16	1.43392	3.00007e-15	AT5G62690
chr1	7605800	7606399	274	210	7.12359e-09	1.43382	2.65017e-08	AT1G21660
chr2	7445200	7445999	471	361	6.31973e-14	1.43377	5.30852e-13	AT2G17110
chr1	22908000	22908999	574	440	1.53096e-16	1.43359	1.91243e-15	AT1G61980
chr5	22740400	22741199	407	312	2.7922e-12	1.43352	1.79981e-11	AT5G56180
chr2	18328400	18328999	270	207	9.28393e-09	1.43337	3.39088e-08	AT2G44410
chr5	18951000	18951399	270	207	9.28393e-09	1.43337	3.39088e-08	AT5G46700
chr5	20863000	20863599	343	263	1.24792e-10	1.43319	6.19056e-10	AT5G51340
chr3	2560800	2561599	416	319	1.71207e-12	1.43307	1.14128e-11	AT3G08020
chr1	8586400	8586999	356	273	5.87164e-11	1.43302	3.07643e-10	AT1G24240
chr5	10925800	10926199	163	125	5.67721e-06	1.43299	1.30406e-05	AT5G28900
chr4	12650000	12651199	785	602	7.47564e-22	1.43297	2.08976e-20	AT4G24480
chr1	6666000	6666999	781	599	9.69395e-22	1.43281	2.65881e-20	AT1G19270
chr1	6666000	6666999	781	599	9.69395e-22	1.43281	2.65881e-20	AT1G19290
chr2	6950200	6950799	206	158	4.33569e-07	1.43276	1.20066e-06	AT2G15970
chr3	5966000	5966599	279	214	5.66758e-09	1.4327	2.1512e-08	AT3G17430
chr4	13754000	13754799	490	376	2.46745e-14	1.4321	2.22153e-13	AT4G27540
chr5	25762600	25764199	645	495	3.02233e-18	1.43192	4.89287e-17	AT5G64430
chr2	9046800	9047599	572	439	2.13161e-16	1.43185	2.60599e-15	AT2G21090
chr4	15050800	15052399	917	704	4.69957e-25	1.4314	1.99416e-23	AT4G30930
chr4	15050800	15052399	917	704	4.69957e-25	1.4314	1.99416e-23	AT4G30935
chr1	28681200	28681999	633	486	6.60132e-18	1.4313	1.01569e-16	AT1G76430
chr3	20925000	20926799	1055	810	1.65702e-28	1.4313	1.14033e-26	AT3G56430
chr3	20925000	20926799	1055	810	1.65702e-28	1.4313	1.14033e-26	AT3G56440
chr5	1359400	1361399	948	728	8.48312e-26	1.43101	3.97384e-24	AT5G04720
chr5	1359400	1361399	948	728	8.48312e-26	1.43101	3.97384e-24	AT5G04710
chr3	5018200	5019399	694	533	2.05271e-19	1.43086	3.95193e-18	AT3G14920
chr3	16807200	16807799	319	245	6.06469e-10	1.43083	2.71334e-09	AT3G45770
chr4	9825200	9825999	332	255	2.84941e-10	1.43075	1.33942e-09	AT4G17640
chr3	5203200	5203799	207	159	4.49616e-07	1.43066	1.2411e-06	AT3G15410
chr5	20851600	20852399	414	318	2.38773e-12	1.43066	1.55391e-11	AT5G51300
chr1	23285000	23286799	1462	1123	1.31531e-38	1.43065	3.55602e-36	AT1G62870
chr2	15613800	15614799	509	391	9.63203e-15	1.43056	9.29083e-14	AT2G37170
chr2	10955400	10955999	302	232	1.682e-09	1.43049	6.96692e-09	AT2G25720
chr1	2001400	2002199	479	368	5.59847e-14	1.43038	4.76184e-13	AT1G06530
chr2	14381800	14382599	423	325	1.46375e-12	1.43028	9.87221e-12	AT2G34040
chr5	25543800	25545799	872	670	7.87648e-24	1.43023	2.83928e-22	AT5G63830
chr5	25543800	25545799	872	670	7.87648e-24	1.43023	2.83928e-22	AT5G63840
chr1	18385800	18386199	177	136	2.72588e-06	1.43021	6.6129e-06	AT1G49670
chr1	23465400	23466599	885	680	3.74303e-24	1.43021	1.40271e-22	AT1G63250
chr4	16375400	16376799	1019	783	1.70553e-27	1.43014	1.03452e-25	AT4G34200
chr1	16893800	16894399	203	156	5.87303e-07	1.43	1.58759e-06	AT1G44750
chr3	3216400	3216999	406	312	4.03409e-12	1.43	2.5525e-11	AT3G10370
chr2	12209800	12210399	324	249	4.82635e-10	1.42992	2.19617e-09	AT2G28520
chr1	28383000	28383799	566	435	3.84896e-16	1.42985	4.52713e-15	AT1G75590
chr5	3618000	3619799	1024	787	1.36198e-27	1.42985	8.39594e-26	AT5G11330
chr5	3618000	3619799	1024	787	1.36198e-27	1.42985	8.39594e-26	AT5G11340
chr1	13669400	13670199	350	269	1.06647e-10	1.42982	5.37068e-10	AT1G36310
chr2	19366600	19367199	255	196	2.77829e-08	1.42971	9.37408e-08	AT2G47170
chr1	23151800	23152399	480	369	5.79577e-14	1.42948	4.92081e-13	AT1G62540
chr3	3779000	3779399	186	143	1.65256e-06	1.42936	4.15224e-06	AT3G11940
chr5	15268800	15269399	264	203	1.69388e-08	1.42913	5.93203e-08	AT5G38220
chr5	16374800	16375799	593	456	8.93123e-17	1.42907	1.15453e-15	AT5G40870
chr5	2453200	2453999	498	383	2.18307e-14	1.42888	1.98342e-13	AT5G07710
chr3	582600	584199	1035	796	8.98413e-28	1.42887	5.72474e-26	AT3G02700
chr3	582600	584199	1035	796	8.98413e-28	1.42887	5.72474e-26	AT3G02710
chr4	269000	269999	823	633	1.71276e-22	1.42876	5.2029e-21	AT4G00650
chr1	28518000	28519599	1239	953	8.06872e-33	1.42871	9.91562e-31	AT1G75960
chr1	20407000	20407599	299	230	2.26861e-09	1.42859	9.17968e-09	AT1G54650
chr3	2054600	2055399	455	350	2.68909e-13	1.42859	2.04546e-12	AT3G06590
chr5	305000	305799	533	410	2.99702e-15	1.42859	3.13189e-14	AT5G01790
chr3	1031600	1032999	776	597	2.68823e-21	1.42841	6.87496e-20	AT3G03980
chr1	9731600	9732399	477	367	7.79086e-14	1.42829	6.47243e-13	AT1G27930
chr1	3972600	3973199	243	187	6.15982e-08	1.428	1.95989e-07	AT1G11760
chr2	1739800	1740399	369	284	4.13568e-11	1.42782	2.21973e-10	AT2G04940
chr4	231800	232199	178	137	2.82614e-06	1.42779	6.83948e-06	AT4G00525
chr1	22919600	22920399	304	234	1.80409e-09	1.42765	7.4287e-09	AT1G62020
chr4	13355200	13355999	569	438	4.26508e-16	1.42759	4.99175e-15	AT4G26430
chr2	16686000	16686599	339	261	2.43133e-10	1.42733	1.15727e-09	AT2G39970
chr1	7412200	7413599	883	680	7.7044e-24	1.42698	2.78787e-22	AT1G21160
chr1	7412200	7413599	883	680	7.7044e-24	1.42698	2.78787e-22	AT1G21170
chr1	27025000	27027199	1040	801	1.06299e-27	1.42681	6.66129e-26	AT1G71850
chr1	27025000	27027199	1040	801	1.06299e-27	1.42681	6.66129e-26	AT1G71860
chr4	8251400	8251999	235	181	1.04795e-07	1.42677	3.20758e-07	AT4G14340
chr2	19096600	19097599	666	513	1.88401e-18	1.42666	3.12762e-17	AT2G46520
chr5	7217200	7217999	357	275	9.09633e-11	1.42659	4.63137e-10	AT5G21326
chr5	3133400	3134199	479	369	8.34071e-14	1.42651	6.91406e-13	AT5G10020
chr3	51600	52399	405	312	5.81438e-12	1.42648	3.57379e-11	AT3G01150
chr2	16931000	16931799	318	245	8.76406e-10	1.42635	3.80849e-09	AT2G40540
chr4	11992800	11994799	1120	863	1.31824e-29	1.42617	1.07533e-27	AT4G22850
chr4	11992800	11994799	1120	863	1.31824e-29	1.42617	1.07533e-27	AT4G22840
chr5	18111000	18111799	340	262	2.51632e-10	1.42607	1.19562e-09	AT5G44860
chr2	12978200	12978799	327	252	5.35561e-10	1.42597	2.42013e-09	AT2G30460
chr1	5867600	5868399	423	326	2.18248e-12	1.42589	1.43265e-11	AT1G17160
chr1	22141000	22141399	157	121	1.04747e-05	1.42587	2.30263e-05	AT1G60060
chr1	17276800	17277599	349	269	1.53878e-10	1.42573	7.53662e-10	AT1G47056
chr2	19343600	19345199	816	629	4.41277e-22	1.42562	1.26533e-20	AT2G47090
chr2	19343600	19345199	816	629	4.41277e-22	1.42562	1.26533e-20	AT2G47100
chr2	19343600	19345199	816	629	4.41277e-22	1.42562	1.26533e-20	AT2G47110
chr2	19343600	19345199	816	629	4.41277e-22	1.42562	1.26533e-20	AT2G47115
chr5	7937800	7938199	179	138	2.92852e-06	1.42541	7.07458e-06	AT5G23540
chr1	21027400	21029199	1214	936	8.06133e-32	1.4253	8.29134e-30	AT1G56180
chr1	21027400	21029199	1214	936	8.06133e-32	1.4253	8.29134e-30	AT1G56190
chr1	27742200	27742999	498	384	3.24714e-14	1.42516	2.8609e-13	AT1G73770
chr3	15753800	15754199	166	128	6.33115e-06	1.42516	1.44288e-05	AT3G43920
chr3	20166600	20167199	415	320	3.68473e-12	1.42516	2.3432e-11	AT3G54460
chr3	7089200	7089799	284	219	6.75528e-09	1.42508	2.52356e-08	AT3G20320
chr5	22686800	22687599	341	263	2.60358e-10	1.42483	1.2346e-09	AT5G56030
chr1	24361400	24361799	188	145	1.77441e-06	1.4248	4.44071e-06	AT1G65520
chr4	9822000	9822799	446	344	6.52699e-13	1.42476	4.66654e-12	AT4G17620
chr5	13360600	13361799	560	432	1.03102e-15	1.42452	1.14912e-14	AT5G35100
chr3	18712400	18714399	1142	881	5.71562e-30	1.42448	4.82893e-28	AT3G50420
chr3	18712400	18714399	1142	881	5.71562e-30	1.42448	4.82893e-28	AT3G50430
chr1	12108800	12109599	442	341	8.47798e-13	1.4244	5.94904e-12	AT1G33410
chr1	12108800	12109599	442	341	8.47798e-13	1.4244	5.94904e-12	AT1G33400
chr5	4632400	4633799	784	605	3.51325e-21	1.42405	8.81807e-20	AT5G14370
chr5	10477800	10478999	955	737	2.35779e-25	1.42397	1.04499e-23	AT5G28500
chr2	17858000	17859399	828	639	2.99966e-22	1.42395	8.77412e-21	AT2G42920
chr2	17858000	17859399	828	639	2.99966e-22	1.42395	8.77412e-21	AT2G42910
chr1	18416400	18417199	355	274	1.26616e-10	1.42378	6.27852e-10	AT1G49760
chr5	15470200	15470799	355	274	1.26616e-10	1.42378	6.27852e-10	AT5G38640
chr3	19371200	19371599	193	149	1.40588e-06	1.42343	3.57468e-06	AT3G52230
chr2	8550400	8551599	908	701	3.68409e-24	1.42342	1.38336e-22	AT2G19810
chr3	2717600	2719199	737	569	5.52074e-20	1.42338	1.14561e-18	AT3G08940
chr3	2717600	2719199	737	569	5.52074e-20	1.42338	1.14561e-18	AT3G08943
chr1	7029600	7030799	952	735	3.15606e-25	1.42336	1.36992e-23	AT1G20300
chr1	7029600	7030799	952	735	3.15606e-25	1.42336	1.36992e-23	AT1G20290
chr1	25212000	25212599	215	166	3.96489e-07	1.4233	1.10509e-06	AT1G67325
chr5	23244800	23245599	518	400	1.30687e-14	1.4231	1.23416e-13	AT5G57370
chr1	28545000	28545399	180	139	3.03301e-06	1.42306	7.31207e-06	AT1G76065
chr4	11356400	11357599	720	556	1.50838e-19	1.42306	2.93987e-18	AT4G21350
chr2	16534200	16535199	606	468	9.3147e-17	1.42296	1.20082e-15	AT2G39670
chr1	9054000	9055399	892	689	1.0377e-23	1.42269	3.67073e-22	AT1G26170
chr1	9054000	9055399	892	689	1.0377e-23	1.42269	3.67073e-22	AT1G26180
chr4	842800	843399	378	292	3.76865e-11	1.42257	2.03428e-10	AT4G01940
chr5	26375600	26377199	677	523	1.83314e-18	1.4225	3.05388e-17	AT5G65930
chr5	26375600	26377199	677	523	1.83314e-18	1.4225	3.05388e-17	AT5G65940
chr3	17771800	17772799	532	411	6.38736e-15	1.42244	6.32553e-14	AT3G48115
chr3	17771800	17772799	532	411	6.38736e-15	1.42244	6.32553e-14	AT3G48120
chr1	19976600	19978999	1407	1087	3.57015e-36	1.42242	7.11211e-34	AT1G53520
chr1	19976600	19978999	1407	1087	3.57015e-36	1.42242	7.11211e-34	AT1G53530
chr3	1231200	1232199	796	615	2.38522e-21	1.42234	6.17514e-20	AT3G04570
chr5	15948800	15949199	154	119	1.42154e-05	1.42213	3.05747e-05	AT5G39840
chr3	1415200	1416999	867	670	4.74852e-23	1.42203	1.56561e-21	AT3G05060
chr3	1415200	1416999	867	670	4.74852e-23	1.42203	1.56561e-21	AT3G05070
chr3	2685400	2686399	581	449	4.29318e-16	1.42198	5.02153e-15	AT3G08840
chr5	4941400	4942599	559	432	1.47728e-15	1.42198	1.61324e-14	AT5G15220
chr5	7785800	7786399	251	194	5.42323e-08	1.42179	1.74252e-07	AT5G23150
chr5	25487800	25488599	445	344	9.36707e-13	1.42156	6.52454e-12	AT5G63670
chr1	1242600	1243199	282	218	9.41532e-09	1.42153	3.43522e-08	AT1G04555
chr5	18499000	18499799	542	419	4.05112e-15	1.42151	4.14643e-14	AT5G45610
chr5	17007400	17007999	300	232	3.50332e-09	1.42101	1.36843e-08	AT5G42540
chr1	20211000	20211799	278	215	1.22619e-08	1.42092	4.39583e-08	AT1G54130
chr1	4788600	4789199	265	205	2.62102e-08	1.42055	8.89897e-08	AT1G13980
chr3	457200	457599	159	123	1.12383e-05	1.42055	2.45935e-05	AT3G02280
chr3	7078200	7078799	371	287	6.5822e-11	1.42055	3.4288e-10	AT3G20290
chr1	22814400	22815199	486	376	1.05268e-13	1.42041	8.56857e-13	AT1G61790
chr2	11102200	11102999	433	335	2.05178e-12	1.42039	1.35343e-11	AT2G26060
chr1	25250400	25250799	221	171	3.25227e-07	1.42024	9.20156e-07	AT1G67400
chr2	16356400	16356799	177	137	4.10543e-06	1.41977	9.65158e-06	AT2G39200
chr3	2996800	2997999	540	418	5.60956e-15	1.41965	5.58742e-14	AT3G09770
chr5	4196600	4197399	270	209	2.08017e-08	1.41965	7.18774e-08	AT5G13180
chr1	25940000	25940999	726	562	1.83293e-19	1.4196	3.54324e-18	AT1G68990
chr2	139400	139999	279	216	1.26768e-08	1.41943	4.53513e-08	AT2G01270
chr5	4263400	4264199	465	360	3.75598e-13	1.41943	2.7952e-12	AT5G13310
chr4	8704600	8705599	483	374	1.41147e-13	1.41919	1.12757e-12	AT4G15240
chr2	19427400	19427799	195	151	1.50551e-06	1.41913	3.806e-06	AT2G47320
chr2	10899400	10900199	554	429	2.74088e-15	1.41911	2.87694e-14	AT2G25605
chr5	3128000	3128599	439	340	1.68627e-12	1.4189	1.12646e-11	AT5G10010
chr1	30154800	30155799	643	498	2.024e-17	1.41888	2.8887e-16	AT1G80170
chr1	22331000	22331999	510	395	3.25513e-14	1.41885	2.8666e-13	AT1G60620
chr1	27672800	27673599	346	268	3.07525e-10	1.41875	1.44164e-09	AT1G73600
chr1	27672800	27673599	346	268	3.07525e-10	1.41875	1.44164e-09	AT1G73602
chr1	20389400	20390199	386	299	3.30785e-11	1.41867	1.80043e-10	AT1G54580
chr2	7754200	7755199	710	550	5.17017e-19	1.4186	9.31861e-18	AT2G17830
chr2	13400400	13401199	284	220	1.00623e-08	1.4186	3.65507e-08	AT2G31440
chr2	13400400	13401199	284	220	1.00623e-08	1.4186	3.65507e-08	AT2G31450
chr4	16657000	16659399	1771	1372	2.40262e-44	1.4185	1.22891e-41	AT4G34980
chr1	18038600	18039399	524	406	1.58925e-14	1.41831	1.47796e-13	AT1G48760
chr5	2712400	2713999	937	726	1.99054e-24	1.4183	7.76722e-23	AT5G08415
chr5	2712400	2713999	937	726	1.99054e-24	1.4183	7.76722e-23	AT5G08420
chr5	12549200	12549999	422	327	4.6431e-12	1.41817	2.90289e-11	AT5G33280
chr5	2171600	2172799	791	613	6.49896e-21	1.41801	1.56679e-19	AT5G07000
chr2	18847000	18847799	480	372	1.89199e-13	1.41796	1.47958e-12	AT2G45760
chr5	22786400	22787199	400	310	1.60925e-11	1.41796	9.2093e-11	AT5G56290
chr2	11745600	11747599	1196	927	1.47089e-30	1.4178	1.3319e-28	AT2G27470
chr2	11745600	11747599	1196	927	1.47089e-30	1.4178	1.3319e-28	AT2G27480
chr1	29335400	29336199	289	224	7.98687e-09	1.4178	2.94872e-08	AT1G78010
chr1	11156800	11157399	405	314	1.27943e-11	1.41739	7.46858e-11	AT1G31220
chr4	17966200	17967799	721	559	3.387e-19	1.41739	6.30896e-18	AT4G38350
chr4	17966200	17967799	721	559	3.387e-19	1.41739	6.30896e-18	AT4G38360
chr4	7975000	7976199	868	673	1.06287e-22	1.41732	3.31653e-21	AT4G13750
chr5	7570200	7571799	868	673	1.06287e-22	1.41732	3.31653e-21	AT5G22760
chr5	7570200	7571799	868	673	1.06287e-22	1.41732	3.31653e-21	AT5G22750
chr1	29272200	29273399	788	611	8.68975e-21	1.41726	2.04037e-19	AT1G77850
chr2	1013200	1013999	423	328	4.79498e-12	1.4172	2.99094e-11	AT2G03330
chr3	22249400	22250199	285	221	1.03974e-08	1.41715	3.76523e-08	AT3G60200
chr5	6276000	6276799	481	373	1.95355e-13	1.4171	1.52332e-12	AT5G18830
chr1	4187400	4187999	401	311	1.66191e-11	1.41693	9.48198e-11	AT1G12310
chr1	23100600	23100999	205	159	9.43811e-07	1.41684	2.46946e-06	AT1G62422
chr5	7132800	7133399	263	204	3.64783e-08	1.41674	1.20564e-07	AT5G20990
chr3	20790600	20792199	1110	861	2.1169e-28	1.41672	1.44109e-26	AT3G56020
chr3	20790600	20792199	1110	861	2.1169e-28	1.41672	1.44109e-26	AT3G56030
chr1	30234400	30234999	281	218	1.35364e-08	1.41649	4.81082e-08	AT1G80410
chr2	1429800	1430399	348	270	3.28114e-10	1.41638	1.52982e-09	AT2G04190
chr1	4334600	4335399	540	419	8.27046e-15	1.41626	8.03071e-14	AT1G12730
chr4	18533800	18534199	183	142	3.35912e-06	1.41621	8.02668e-06	AT4G39960
chr1	739600	740799	741	575	1.36347e-19	1.41617	2.68229e-18	AT1G03090
chr3	21362200	21362799	250	194	7.80865e-08	1.41613	2.44384e-07	AT3G57660
chr4	6642600	6642999	192	149	2.03368e-06	1.41605	5.04753e-06	AT4G10790
chr3	20394200	20394799	326	253	1.14351e-09	1.416	4.8741e-09	AT3G55020
chr3	10029200	10030199	746	579	1.086e-19	1.41588	2.14985e-18	AT3G27180
chr5	1936400	1937199	545	423	6.58144e-15	1.41586	6.50072e-14	AT5G06340
chr1	23785400	23786599	925	718	6.34427e-24	1.41573	2.32235e-22	AT1G64080
chr2	10548400	10549399	505	392	6.03052e-14	1.4157	5.0859e-13	AT2G24755
chr3	19048600	19049399	438	340	2.41048e-12	1.41566	1.56818e-11	AT3G51310
chr5	23321800	23322799	903	701	2.16845e-23	1.41558	7.34132e-22	AT5G57590
chr5	18920400	18920799	152	118	1.99458e-05	1.41555	4.18856e-05	AT5G46630
chr1	9611200	9611799	237	184	1.67363e-07	1.41545	4.96136e-07	AT1G27630
chr1	30272800	30273999	483	375	2.08164e-13	1.4154	1.61323e-12	AT1G80510
chr1	2120200	2121799	1002	778	1.04278e-25	1.41531	4.81334e-24	AT1G06900
chr1	2120200	2121799	1002	778	1.04278e-25	1.41531	4.81334e-24	AT1G06910
chr1	10846600	10847399	519	403	2.9422e-14	1.41523	2.61598e-13	AT1G30610
chr4	14030200	14030999	519	403	2.9422e-14	1.41523	2.61598e-13	AT4G28360
chr1	29388000	29388599	282	219	1.39813e-08	1.41504	4.95869e-08	AT1G78100
chr5	5299800	5300599	573	445	1.56962e-15	1.41501	1.7062e-14	AT5G16220
chr4	8875800	8876599	309	240	3.16977e-09	1.41485	1.24845e-08	AT4G15545
chr2	7740000	7740599	233	181	2.18199e-07	1.41463	6.3393e-07	AT2G17800
chr3	8467600	8467999	242	188	1.32628e-07	1.41456	3.99806e-07	AT3G23590
chr1	17982400	17984399	1013	787	6.83077e-26	1.41449	3.24805e-24	AT1G48630
chr1	17982400	17984399	1013	787	6.83077e-26	1.41449	3.24805e-24	AT1G48635
chr3	16262000	16262399	148	115	2.61312e-05	1.41426	5.3906e-05	AT3G44713
chr1	3604400	3604999	314	244	2.51582e-09	1.41418	1.00937e-08	AT1G10820
chr4	6844800	6845599	951	739	2.10196e-24	1.41417	8.13488e-23	AT4G11230
chr1	22904400	22905399	480	373	2.78733e-13	1.41416	2.1117e-12	AT1G61970
chr1	5329000	5329999	821	638	2.43898e-21	1.41412	6.29709e-20	AT1G15510
chr3	56800	58599	938	729	4.42031e-24	1.41397	1.64351e-22	AT3G01160
chr3	56800	58599	938	729	4.42031e-24	1.41397	1.64351e-22	AT3G01170
chr2	19261000	19262199	772	600	3.5899e-20	1.41394	7.60794e-19	AT2G46870
chr2	386600	387199	220	171	4.68534e-07	1.41381	1.28937e-06	AT2G01850
chr2	15952800	15953599	759	590	7.56162e-20	1.41369	1.53875e-18	AT2G38110
chr3	535800	537999	1060	824	6.43129e-27	1.41365	3.60095e-25	AT3G02540
chr3	535800	537999	1060	824	6.43129e-27	1.41365	3.60095e-25	AT3G02550
chr5	26296200	26297199	530	412	1.92118e-14	1.41365	1.76412e-13	AT5G65720
chr4	2367400	2368399	647	503	3.37511e-17	1.41352	4.66573e-16	AT4G04670
chr4	9915600	9916799	692	538	2.95438e-18	1.41348	4.79106e-17	AT4G17830
chr4	9814400	9814999	400	311	2.37404e-11	1.4134	1.32455e-10	AT4G17610
chr1	3041000	3042799	971	755	8.46999e-25	1.41331	3.50754e-23	AT1G09420
chr1	3041000	3042799	971	755	8.46999e-25	1.41331	3.50754e-23	AT1G09430
chr1	19125600	19126599	634	493	7.12089e-17	1.41321	9.37154e-16	AT1G51580
chr1	3311000	3311399	153	119	2.06224e-05	1.41289	4.32251e-05	AT1G10130
chr1	11604400	11604999	459	357	9.93794e-13	1.41289	6.89679e-12	AT1G32200
chr2	13270000	13270399	216	168	6.11216e-07	1.41289	1.64729e-06	AT2G31140
chr4	2516400	2517199	495	385	1.40168e-13	1.41289	1.12069e-12	AT4G04940
chr4	14063800	14064799	540	420	1.21564e-14	1.41289	1.15434e-13	AT4G28450
chr5	15381000	15382199	414	322	1.15436e-11	1.41289	6.78458e-11	AT5G38420
chr5	6750000	6750999	518	403	4.19044e-14	1.4125	3.62616e-13	AT5G19980
chr5	19469400	19470799	820	638	3.46309e-21	1.4124	8.72689e-20	AT5G48030
chr5	19469400	19470799	820	638	3.46309e-21	1.4124	8.72689e-20	AT5G48040
chr1	22911200	22911999	374	291	1.07066e-10	1.41235	5.38888e-10	AT1G61990
chr1	24105000	24106399	667	519	1.35456e-17	1.41229	1.97801e-16	AT1G64880
chr5	20351400	20351799	239	186	1.78499e-07	1.41205	5.26264e-07	AT5G50020
chr5	14897400	14897999	370	288	1.39085e-10	1.4118	6.85466e-10	AT5G37510
chr1	19499200	19499599	176	137	5.93197e-06	1.41175	1.35599e-05	AT1G52360
chr3	11073600	11074199	492	383	1.87525e-13	1.41166	1.4671e-12	AT3G29090
chr5	19772000	19773999	894	696	7.55215e-23	1.41154	2.41426e-21	AT5G48760
chr5	19772000	19773999	894	696	7.55215e-23	1.41154	2.41426e-21	AT5G48770
chr2	1039400	1039999	429	334	5.79195e-12	1.41148	3.56117e-11	AT2G03440
chr1	25896800	25897799	637	496	7.80787e-17	1.41131	1.01906e-15	AT1G68890
chr4	793400	794399	719	560	1.00391e-18	1.41093	1.73348e-17	AT4G01840
chr2	18437400	18438599	493	384	1.93373e-13	1.41085	1.50911e-12	AT2G44730
chr2	15117000	15118599	1009	786	1.88907e-25	1.4107	8.5528e-24	AT2G36000
chr1	18678200	18679999	905	705	4.93699e-23	1.41067	1.62491e-21	AT1G50420
chr5	4857200	4857799	335	261	1.02989e-09	1.41049	4.41766e-09	AT5G15010
chr3	19899200	19901199	1449	1129	1.31953e-35	1.41039	2.24975e-33	AT3G53690
chr3	19899200	19901199	1449	1129	1.31953e-35	1.41039	2.24975e-33	AT3G53700
chr5	6414600	6415599	462	360	1.09012e-12	1.41028	7.50747e-12	AT5G19120
chr5	25415000	25417999	1264	985	2.64602e-31	1.41018	2.54193e-29	AT5G63460
chr5	25415000	25417999	1264	985	2.64602e-31	1.41018	2.54193e-29	AT5G63470
chr5	25415000	25417999	1264	985	2.64602e-31	1.41018	2.54193e-29	AT5G63480
chr5	4601000	4601599	349	272	4.99164e-10	1.41001	2.26729e-09	AT5G14260
chr5	17160400	17160999	349	272	4.99164e-10	1.41001	2.26729e-09	AT5G42790
chr5	9578400	9579199	417	325	1.26655e-11	1.40999	7.39572e-11	AT5G27220
chr3	4798200	4799599	893	696	1.07003e-22	1.40996	3.32518e-21	AT3G14370
chr4	11541600	11542999	671	523	1.52986e-17	1.40989	2.22199e-16	AT4G21710
chr4	11541600	11542999	671	523	1.52986e-17	1.40989	2.22199e-16	AT4G21720
chr1	22399600	22400399	467	364	8.6636e-13	1.40987	6.0703e-12	AT1G60850
chr4	10961600	10962199	399	311	3.38309e-11	1.40986	1.83821e-10	AT4G20310
chr5	16096200	16097199	585	456	1.54919e-15	1.40979	1.68594e-14	AT5G40270
chr5	5120800	5123199	1465	1142	6.88176e-36	1.40973	1.26444e-33	AT5G15700
chr5	5120800	5123199	1465	1142	6.88176e-36	1.40973	1.26444e-33	AT5G15710
chr2	15135800	15136599	567	442	4.11348e-15	1.4097	4.20571e-14	AT2G36050
chr3	4815000	4815599	313	244	3.59474e-09	1.40968	1.4024e-08	AT3G14400
chr5	26362800	26363399	304	237	5.89395e-09	1.40958	2.22685e-08	AT5G65910
chr5	5250400	5251199	540	421	1.7814e-14	1.40954	1.64213e-13	AT5G16070
chr1	27341000	27341999	835	651	2.55423e-21	1.40952	6.55886e-20	AT1G72620
chr3	22143000	22144199	690	538	5.95128e-18	1.40939	9.24696e-17	AT3G59940
chr4	7177200	7177799	268	209	4.27734e-08	1.40914	1.39904e-07	AT4G11960
chr5	24149200	24149799	209	163	1.07406e-06	1.40904	2.78028e-06	AT5G59980
chr1	23246000	23246799	459	358	1.45789e-12	1.40895	9.84324e-12	AT1G62770
chr4	15652200	15653999	1100	858	2.22408e-27	1.40887	1.33198e-25	AT4G32420
chr4	15652200	15653999	1100	858	2.22408e-27	1.40887	1.33198e-25	AT4G32430
chr4	1364800	1365399	332	259	1.38044e-09	1.40865	5.80036e-09	AT4G03080
chr1	27798800	27799599	423	330	1.03719e-11	1.40861	6.15323e-11	AT1G73940
chr2	18564000	18565199	937	731	1.33643e-23	1.4086	4.61533e-22	AT2G45000
chr1	30414400	30415199	414	323	1.69477e-11	1.40852	9.65489e-11	AT1G80950
chr2	315800	316599	414	323	1.69477e-11	1.40852	9.65489e-11	AT2G01710
chr2	8158200	8158999	414	323	1.69477e-11	1.40852	9.65489e-11	AT2G18840
chr3	10518000	10518999	437	341	5.04337e-12	1.40829	3.13039e-11	AT3G28200
chr1	16926400	16927199	560	437	7.12039e-15	1.40822	6.98204e-14	AT1G44820
chr1	12530600	12531599	774	604	8.1506e-20	1.40821	1.64973e-18	AT1G34340
chr1	1723800	1724399	214	167	8.49581e-07	1.40819	2.23434e-06	AT1G05750
chr1	1723800	1724399	214	167	8.49581e-07	1.40819	2.23434e-06	AT1G05760
chr4	10413600	10415199	1043	814	5.43321e-26	1.40807	2.60313e-24	AT4G19010
chr4	10413600	10415199	1043	814	5.43321e-26	1.40807	2.60313e-24	AT4G19020
chr5	19165200	19166199	624	487	2.40784e-16	1.40806	2.90986e-15	AT5G47190
chr1	8693200	8694399	902	704	9.59899e-23	1.40799	3.00763e-21	AT1G24530
chr1	19052000	19052599	205	160	1.40144e-06	1.40799	3.56577e-06	AT1G51390
chr1	19052000	19052599	205	160	1.40144e-06	1.40799	3.56577e-06	AT1G51400
chr1	19052000	19052599	205	160	1.40144e-06	1.40799	3.56577e-06	AT1G51402
chr1	10429800	10431199	638	498	1.17605e-16	1.40785	1.48875e-15	AT1G29790
chr1	12265000	12265599	278	217	2.68592e-08	1.40783	9.09482e-08	AT1G33810
chr4	2762000	2762399	237	185	2.47701e-07	1.4078	7.14049e-07	AT4G05460
chr4	14742200	14743599	866	676	6.6981e-22	1.40778	1.88074e-20	AT4G30150
chr3	3442600	3443199	269	210	4.41152e-08	1.40766	1.43945e-07	AT3G10985
chr3	7704400	7704999	374	292	1.57245e-10	1.40752	7.69353e-10	AT3G21870
chr2	18937000	18938199	625	488	2.48066e-16	1.40742	2.99022e-15	AT2G46040
chr2	8239200	8239799	251	196	1.19192e-07	1.40729	3.61376e-07	AT2G18990
chr5	18791800	18795599	1712	1337	3.50659e-41	1.40714	1.47472e-38	AT5G46330
chr1	2635200	2636399	475	371	7.53653e-13	1.40697	5.3439e-12	AT1G08350
chr1	2635200	2636399	475	371	7.53653e-13	1.40697	5.3439e-12	AT1G08360
chr5	25467600	25468399	434	339	6.74316e-12	1.40687	4.10996e-11	AT5G63620
chr3	22986200	22986999	626	489	2.55536e-16	1.40679	3.07243e-15	AT3G62080
chr1	22937400	22938999	1179	921	5.66469e-29	1.40676	4.28817e-27	AT1G62050
chr1	11858200	11859199	818	639	1.01366e-20	1.40675	2.3596e-19	AT1G32760
chr2	18953200	18953999	425	332	1.1016e-11	1.40675	6.49466e-11	AT2G46090
chr2	18953200	18953999	425	332	1.1016e-11	1.40675	6.49466e-11	AT2G46100
chr3	3229000	3229599	352	275	5.46957e-10	1.40661	2.46691e-09	AT3G10390
chr5	1639800	1641999	1088	850	6.99841e-27	1.40661	3.88401e-25	AT5G05550
chr5	1639800	1641999	1088	850	6.99841e-27	1.40661	3.88401e-25	AT5G05560
chr5	383200	383999	567	443	6.00878e-15	1.40651	5.9631e-14	AT5G02010
chr2	18755800	18757199	590	461	1.79914e-15	1.40642	1.93568e-14	AT2G45520
chr2	18755800	18757199	590	461	1.79914e-15	1.40642	1.93568e-14	AT2G45530
chr3	5213000	5213999	558	436	9.7935e-15	1.40641	9.42257e-14	AT3G15450
chr1	5678200	5678799	398	311	4.80926e-11	1.40633	2.55517e-10	AT1G16610
chr1	2066600	2068199	1066	833	2.38615e-26	1.4063	1.21719e-24	AT1G06730
chr1	2066600	2068199	1066	833	2.38615e-26	1.4063	1.21719e-24	AT1G06720
chr1	8784000	8784999	522	408	6.91994e-14	1.40597	5.78956e-13	AT1G24881
chr2	4317200	4317799	348	272	7.10465e-10	1.40597	3.1481e-09	AT2G10950
chr4	433200	433799	229	179	4.20642e-07	1.40588	1.16794e-06	AT4G01000
chr5	16315600	16317399	1026	802	2.14632e-25	1.40585	9.55744e-24	AT5G40770
chr4	12436200	12437799	1210	946	1.4883e-29	1.40559	1.19856e-27	AT4G23930
chr4	12436200	12437799	1210	946	1.4883e-29	1.40559	1.19856e-27	AT4G23940
chr5	7313000	7313799	330	258	1.90603e-09	1.40559	7.80094e-09	AT5G22080
chr4	10527600	10528999	738	577	8.3113e-19	1.40555	1.44702e-17	AT4G19240
chr4	10842000	10842799	573	448	4.91996e-15	1.40553	4.96059e-14	AT4G20010
chr1	26942000	26942999	463	362	1.64344e-12	1.40552	1.09921e-11	AT1G71528
chr1	26942000	26942999	463	362	1.64344e-12	1.40552	1.09921e-11	AT1G71530
chr3	21019800	21020599	463	362	1.64344e-12	1.40552	1.09921e-11	AT3G56750
chr3	21019800	21020599	463	362	1.64344e-12	1.40552	1.09921e-11	AT3G56760
chr2	18571400	18573199	1137	889	6.96943e-28	1.40548	4.50159e-26	AT2G45023
chr2	18571400	18573199	1137	889	6.96943e-28	1.40548	4.50159e-26	AT2G45030
chr1	25880400	25881399	486	380	4.9007e-13	1.40546	3.58091e-12	AT1G68840
chr3	16875200	16875999	509	398	1.46285e-13	1.4054	1.16468e-12	AT3G45900
chr5	4793200	4793999	321	251	3.12351e-09	1.40539	1.23253e-08	AT5G14820
chr1	26932000	26932999	647	506	1.05258e-16	1.40514	1.34777e-15	AT1G71480
chr1	26932000	26932999	647	506	1.05258e-16	1.40514	1.34777e-15	AT1G71490
chr5	16004400	16004999	280	219	2.8544e-08	1.40501	9.61543e-08	AT5G39990
chr1	4484600	4485399	473	370	1.03694e-12	1.40483	7.16468e-12	AT1G13160
chr2	12693800	12694799	744	582	6.80762e-19	1.4048	1.20181e-17	AT2G29690
chr3	5727000	5727799	487	381	5.04722e-13	1.40465	3.67662e-12	AT3G16810
chr3	8648600	8649399	602	471	1.20607e-15	1.40456	1.32625e-14	AT3G23940
chr5	5591800	5592599	409	320	3.12214e-11	1.40455	1.70919e-10	AT5G17010
chr1	638000	638799	575	450	5.21666e-15	1.40417	5.22909e-14	AT1G02870
chr1	11695800	11696599	276	216	3.71335e-08	1.40417	1.22623e-07	AT1G32415
chr5	652000	654799	1689	1322	3.52772e-40	1.40399	1.21386e-37	AT5G02850
chr5	652000	654799	1689	1322	3.52772e-40	1.40399	1.21386e-37	AT5G02860
chr3	2694600	2695199	313	245	5.27577e-09	1.40392	2.00934e-08	AT3G08850
chr3	20136200	20136799	290	227	1.79159e-08	1.4039	6.24532e-08	AT3G54380
chr5	23609600	23610199	281	220	2.94128e-08	1.40362	9.88171e-08	AT5G58410
chr4	2757200	2759199	1161	909	3.14375e-28	1.40357	2.09491e-26	AT4G05440
chr4	2757200	2759199	1161	909	3.14375e-28	1.40357	2.09491e-26	AT4G05450
chr1	7645600	7646399	318	249	4.18193e-09	1.40344	1.61549e-08	AT1G21750
chr1	20900600	20903799	1687	1321	4.82381e-40	1.40339	1.57398e-37	AT1G55880
chr1	20900600	20903799	1687	1321	4.82381e-40	1.40339	1.57398e-37	AT1G55890
chr1	20900600	20903799	1687	1321	4.82381e-40	1.40339	1.57398e-37	AT1G55900
chr4	13584200	13585199	650	509	1.14847e-16	1.40333	1.45676e-15	AT4G27060
chr3	19075600	19076199	355	278	5.98081e-10	1.40329	2.67898e-09	AT3G51390
chr2	7820800	7821999	535	419	4.77097e-14	1.40315	4.10039e-13	AT2G17970
chr2	7820800	7821999	535	419	4.77097e-14	1.40315	4.10039e-13	AT2G17972
chr2	5708200	5708999	512	401	1.59704e-13	1.40311	1.26301e-12	AT2G13690
chr1	29735800	29736799	429	336	1.23987e-11	1.40308	7.24885e-11	AT1G79040
chr5	19599800	19600599	549	430	2.3253e-14	1.40304	2.10657e-13	AT5G48370
chr1	30110400	30111199	383	300	1.40559e-10	1.40295	6.91827e-10	AT1G80040
chr5	18525000	18525799	503	394	2.60513e-13	1.40293	1.98639e-12	AT5G45660
chr3	2904400	2905799	623	488	4.95908e-16	1.40292	5.75418e-15	AT3G09440
chr2	16038200	16038999	517	405	1.26875e-13	1.40281	1.02306e-12	AT2G38280
chr2	8923200	8923999	494	387	4.25023e-13	1.40275	3.13834e-12	AT2G20690
chr1	7754400	7754999	328	257	2.6279e-09	1.40251	1.05033e-08	AT1G22020
chr3	2617800	2618599	499	391	3.37598e-13	1.40245	2.53032e-12	AT3G08620
chr5	9490200	9491399	416	326	2.62774e-11	1.4023	1.45707e-10	AT5G26980
chr5	9490200	9491399	416	326	2.62774e-11	1.4023	1.45707e-10	AT5G26990
chr1	27619600	27620199	245	192	2.14738e-07	1.40226	6.24449e-07	AT1G73460
chr5	23561400	23562999	962	754	1.30938e-23	1.40207	4.53846e-22	AT5G58260
chr5	23561400	23562999	962	754	1.30938e-23	1.40207	4.53846e-22	AT5G58270
chr4	15602000	15603199	421	330	2.08562e-11	1.40195	1.17297e-10	AT4G32300
chr4	15602000	15603199	421	330	2.08562e-11	1.40195	1.17297e-10	AT4G32320
chr2	11595200	11595799	347	272	1.0084e-09	1.40193	4.33038e-09	AT2G27130
chr1	5251600	5252799	560	439	1.51116e-14	1.40181	1.41298e-13	AT1G15270
chr1	5251600	5252799	560	439	1.51116e-14	1.40181	1.41298e-13	AT1G15280
chr5	787600	787999	162	127	1.84724e-05	1.40177	3.89951e-05	AT5G03280
chr4	274400	274999	213	167	1.2144e-06	1.40161	3.11776e-06	AT4G00660
chr5	9789800	9790399	213	167	1.2144e-06	1.40161	3.11776e-06	AT5G27660
chr3	5020600	5021199	301	236	1.15834e-08	1.40158	4.16918e-08	AT3G14930
chr3	3099000	3099799	542	425	4.01555e-14	1.40144	3.48438e-13	AT3G10050
chr1	3387800	3389599	1135	890	2.00311e-27	1.40143	1.20729e-25	AT1G10320
chr1	3387800	3389599	1135	890	2.00311e-27	1.40143	1.20729e-25	AT1G10330
chr1	11821200	11821799	227	178	5.82274e-07	1.40143	1.57512e-06	AT1G32690
chr2	867200	870199	1353	1061	2.75603e-32	1.40135	3.05017e-30	AT2G02970
chr2	867200	870199	1353	1061	2.75603e-32	1.40135	3.05017e-30	AT2G02980
chr1	6779000	6779799	584	458	4.65294e-15	1.40124	4.71397e-14	AT1G19600
chr1	11426000	11426799	343	269	1.30941e-09	1.40122	5.51171e-09	AT1G31840
chr2	6810400	6811399	394	309	9.1094e-11	1.40121	4.63678e-10	AT2G15620
chr1	5323000	5323799	547	429	3.19029e-14	1.40118	2.81737e-13	AT1G15490
chr1	8188400	8188999	306	240	9.1773e-09	1.40112	3.35549e-08	AT1G23090
chr1	11143800	11145399	937	735	5.9412e-23	1.40093	1.9286e-21	AT1G31180
chr1	11143800	11145399	937	735	5.9412e-23	1.40093	1.9286e-21	AT1G31190
chr1	5996000	5997799	1081	848	3.66733e-26	1.40086	1.82163e-24	AT1G17455
chr1	5996000	5997799	1081	848	3.66733e-26	1.40086	1.82163e-24	AT1G17450
chr1	25235400	25235999	232	182	4.60426e-07	1.40082	1.26891e-06	AT1G67350
chr3	9958000	9958799	464	364	2.46467e-12	1.40082	1.60041e-11	AT3G27010
chr5	6226000	6227599	464	364	2.46467e-12	1.40082	1.60041e-11	AT5G18670
chr1	13454800	13455599	413	324	3.50823e-11	1.40078	1.90239e-10	AT1G36060
chr1	8111200	8111999	478	375	1.1989e-12	1.40075	8.1999e-12	AT1G22920
chr4	12684400	12684799	181	142	6.93551e-06	1.40073	1.56909e-05	AT4G24560
chr4	12399600	12400799	701	550	1.19315e-17	1.40062	1.75313e-16	AT4G23820
chr4	12399600	12400799	701	550	1.19315e-17	1.40062	1.75313e-16	AT4G23840
chr3	3740600	3741599	585	459	4.78735e-15	1.40058	4.84236e-14	AT3G11850
chr1	26363600	26364799	664	521	8.13866e-17	1.40054	1.05786e-15	AT1G70000
chr4	13689200	13690599	952	747	2.99291e-23	1.40049	9.97197e-22	AT4G27340
chr4	7731200	7731799	274	215	5.12498e-08	1.40048	1.65202e-07	AT4G13270
chr5	2602000	2602799	460	361	3.19453e-12	1.40028	2.04868e-11	AT5G08120
chr4	15797600	15798199	316	248	5.76154e-09	1.40023	2.18162e-08	AT4G32750
chr3	20232400	20233199	567	445	1.27119e-14	1.40019	1.20286e-13	AT3G54660
chr1	5149400	5150999	874	686	1.77702e-21	1.40008	4.67086e-20	AT1G14920
chr1	10839200	10839999	437	343	1.07323e-11	1.40008	6.33725e-11	AT1G30590
chr1	20553400	20554999	921	723	1.6589e-22	1.39986	5.04739e-21	AT1G55080
chr1	20553400	20554999	921	723	1.6589e-22	1.39986	5.04739e-21	AT1G55090
chr1	8945400	8946599	684	537	3.25035e-17	1.39974	4.50974e-16	AT1G25470
chr1	8945400	8946599	684	537	3.25035e-17	1.39974	4.50974e-16	AT1G25472
chr1	12320400	12320999	242	190	2.87972e-07	1.39967	8.21258e-07	AT1G33920
chr3	16188400	16189199	377	296	2.50806e-10	1.39963	1.19199e-09	AT3G44610
chr3	20067800	20068399	298	234	1.54997e-08	1.39947	5.45125e-08	AT3G54210
chr3	9459600	9461599	1118	878	7.84482e-27	1.3993	4.31579e-25	AT3G25855
chr3	9459600	9461599	1118	878	7.84482e-27	1.3993	4.31579e-25	AT3G25860
chr5	21323000	21324199	587	461	5.06591e-15	1.39927	5.09418e-14	AT5G52540
chr5	21323000	21324199	587	461	5.06591e-15	1.39927	5.09418e-14	AT5G52545
chr4	6803600	6804199	219	172	9.88616e-07	1.3992	2.57601e-06	AT4G11160
chr5	20993600	20994999	946	743	5.28752e-23	1.39916	1.73125e-21	AT5G51670
chr5	4653000	4653599	275	216	5.27632e-08	1.39908	1.69791e-07	AT5G14430
chr1	11665400	11666199	373	293	3.25423e-10	1.39896	1.51877e-09	AT1G32340
chr2	7823200	7824999	723	568	5.04303e-18	1.3988	7.90061e-17	AT2G17975
chr2	7823200	7824999	723	568	5.04303e-18	1.3988	7.90061e-17	AT2G17980
chr2	17621200	17622399	737	579	2.46467e-18	1.39879	4.03494e-17	AT2G42300
chr1	6344800	6346599	1036	814	5.97927e-25	1.39862	2.52021e-23	AT1G18415
chr1	6344800	6346599	1036	814	5.97927e-25	1.39862	2.52021e-23	AT1G18420
chr1	6344800	6346599	1036	814	5.97927e-25	1.39862	2.52021e-23	AT1G18430
chr1	6344800	6346599	1036	814	5.97927e-25	1.39862	2.52021e-23	AT1G18440
chr3	14722200	14722799	280	220	4.17683e-08	1.39862	1.36759e-07	AT3G42630
chr5	5379400	5379799	210	165	1.63083e-06	1.39862	4.10037e-06	AT5G16470
chr2	13449400	13450799	593	466	4.13957e-15	1.39841	4.2301e-14	AT2G31600
chr2	13449400	13450799	593	466	4.13957e-15	1.39841	4.2301e-14	AT2G31610
chr4	8713000	8715199	1186	932	3.03656e-28	1.39841	2.03063e-26	AT4G15258
chr4	8713000	8715199	1186	932	3.03656e-28	1.39841	2.03063e-26	AT4G15260
chr2	11625200	11625999	411	323	4.81657e-11	1.39831	2.55834e-10	AT2G27200
chr1	26756200	26756999	383	301	2.04659e-10	1.39829	9.85539e-10	AT1G70960
chr5	1098200	1099999	785	617	2.35467e-19	1.39814	4.4831e-18	AT5G04060
chr5	1098200	1099999	785	617	2.35467e-19	1.39814	4.4831e-18	AT5G04050
chr5	7653400	7654599	729	573	4.12249e-18	1.3981	6.52325e-17	AT5G22890
chr5	6945800	6946599	430	338	1.85554e-11	1.39803	1.05012e-10	AT5G20520
chr1	5469400	5471999	949	746	5.74599e-23	1.39795	1.86843e-21	AT1G15920
chr1	5469400	5471999	949	746	5.74599e-23	1.39795	1.86843e-21	AT1G15930
chr5	19303800	19304799	374	294	3.34802e-10	1.39794	1.55986e-09	AT5G47620
chr2	17782200	17783199	720	566	6.7065e-18	1.39791	1.03104e-16	AT2G42710
chr5	5672800	5673599	318	250	6.10239e-09	1.39782	2.30055e-08	AT5G17250
chr5	7168200	7170599	1109	872	1.83718e-26	1.39759	9.52565e-25	AT5G21100
chr2	10000400	10001399	679	534	5.91433e-17	1.39731	7.89899e-16	AT2G23470
chr3	6797400	6798599	843	663	1.42472e-20	1.39726	3.24854e-19	AT3G19570
chr5	8052400	8053199	356	280	8.96738e-10	1.39719	3.88792e-09	AT5G23880
chr1	29777200	29777999	520	409	2.00473e-13	1.39716	1.55841e-12	AT1G79150
chr2	9555200	9556199	520	409	2.00473e-13	1.39716	1.55841e-12	AT2G22490
chr5	5978600	5979199	342	269	1.85263e-09	1.39714	7.60047e-09	AT5G18065
chr2	359800	360799	506	398	4.11777e-13	1.39711	3.04766e-12	AT2G01820
chr3	5471800	5472999	839	660	1.8415e-20	1.39696	4.11943e-19	AT3G16150
chr1	4802600	4803399	450	354	7.35724e-12	1.39693	4.46269e-11	AT1G14020
chr3	4220800	4221599	577	454	1.1616e-14	1.39664	1.10635e-13	AT3G13120
chr2	15859200	15859799	319	251	6.27801e-09	1.39663	2.35971e-08	AT2G37870
chr2	16845200	16845999	535	421	1.00379e-13	1.39649	8.2095e-13	AT2G40330
chr4	13640000	13641599	1211	953	1.39698e-28	1.39642	9.79183e-27	AT4G27240
chr1	27603800	27604399	324	255	4.97321e-09	1.39627	1.90233e-08	AT1G73430
chr4	1611600	1612399	432	340	1.96242e-11	1.39627	1.10598e-10	AT4G03635
chr5	8112000	8112599	324	255	4.97321e-09	1.39627	1.90233e-08	AT5G24000
chr1	1343000	1343599	263	207	1.16045e-07	1.39621	3.52513e-07	AT1G04780
chr5	4683600	4685199	714	562	1.18512e-17	1.39613	1.74269e-16	AT5G14520
chr5	4683600	4685199	714	562	1.18512e-17	1.39613	1.74269e-16	AT5G14530
chr2	11546200	11547599	404	318	8.3276e-11	1.39611	4.26753e-10	AT2G27050
chr3	3313800	3315199	1151	906	3.11891e-27	1.39608	1.81616e-25	AT3G10600
chr1	19044200	19044799	390	307	1.71686e-10	1.39602	8.36548e-10	AT1G51360
chr3	18981600	18982199	282	222	4.42238e-08	1.39592	1.44249e-07	AT3G51100
chr4	16983400	16984199	564	444	2.44965e-14	1.39592	2.2076e-13	AT4G35850
chr1	20073000	20073799	409	322	6.60486e-11	1.39583	3.43965e-10	AT1G53770
chr5	26227200	26228399	362	285	7.3105e-10	1.39582	3.23024e-09	AT5G65630
chr2	6890200	6891399	630	496	8.74396e-16	1.3958	9.87347e-15	AT2G15820
chr5	218200	220399	1152	907	3.20465e-27	1.39576	1.86037e-25	AT5G01560
chr2	18454000	18454799	555	437	3.99211e-14	1.39565	3.46881e-13	AT2G44760
chr1	25330800	25331399	334	263	3.12134e-09	1.39558	1.23194e-08	AT1G67580
chr4	12902200	12903999	988	778	1.29206e-23	1.39554	4.48664e-22	AT4G25150
chr4	12902200	12903999	988	778	1.29206e-23	1.39554	4.48664e-22	AT4G25160
chr2	10402200	10403599	767	604	8.98398e-19	1.39548	1.5584e-17	AT2G24500
chr1	16478400	16478799	160	126	2.56479e-05	1.39545	5.29841e-05	AT1G43690
chr1	27627200	27627799	240	189	3.97146e-07	1.39545	1.10659e-06	AT1G73470
chr1	30409000	30409799	353	278	1.19668e-09	1.39539	5.08583e-09	AT1G80930
chr1	7912000	7912999	546	430	6.50659e-14	1.39537	5.45579e-13	AT1G22410
chr1	1482600	1483799	739	582	3.76007e-18	1.39536	5.97977e-17	AT1G05140
chr4	16299800	16301799	951	749	8.74708e-23	1.39529	2.75898e-21	AT4G34020
chr4	16299800	16301799	951	749	8.74708e-23	1.39529	2.75898e-21	AT4G34030
chr2	10253600	10254599	758	597	1.46089e-18	1.39527	2.46412e-17	AT2G24120
chr1	2381600	2382199	226	178	8.27766e-07	1.39525	2.18304e-06	AT1G07705
chr4	6305400	6305999	339	267	2.47303e-09	1.39525	9.94098e-09	AT4G10090
chr4	11565400	11566399	551	434	5.16686e-14	1.39517	4.41856e-13	AT4G21770
chr5	6446600	6447399	523	412	2.17786e-13	1.39498	1.68366e-12	AT5G19170
chr1	28267600	28268999	721	568	9.94758e-18	1.39493	1.47769e-16	AT1G75330
chr1	28267600	28268999	721	568	9.94758e-18	1.39493	1.47769e-16	AT1G75335
chr1	28267600	28268999	721	568	9.94758e-18	1.39493	1.47769e-16	AT1G75340
chr3	21198600	21199999	542	427	8.4216e-14	1.39488	6.97195e-13	AT3G57290
chr3	21198600	21199999	542	427	8.4216e-14	1.39488	6.97195e-13	AT3G57300
chr5	6947800	6948799	740	583	3.86365e-18	1.39485	6.13934e-17	AT5G20540
chr4	8434200	8435199	703	554	2.63244e-17	1.39447	3.71783e-16	AT4G14720
chr5	21413600	21414199	269	212	9.44343e-08	1.39438	2.9164e-07	AT5G52840
chr1	6315600	6316799	1161	915	2.84007e-27	1.39436	1.6744e-25	AT1G18350
chr1	6315600	6316799	1161	915	2.84007e-27	1.39436	1.6744e-25	AT1G18360
chr5	2390400	2391399	590	465	7.95638e-15	1.39432	7.75757e-14	AT5G07560
chr1	26986200	26987599	1029	811	2.12761e-24	1.39431	8.21734e-23	AT1G71730
chr1	26986200	26987599	1029	811	2.12761e-24	1.39431	8.21734e-23	AT1G71740
chr5	14629600	14630199	288	227	3.59989e-08	1.39422	1.19105e-07	AT5G37020
chr5	6762600	6764399	628	495	1.1944e-15	1.39418	1.31725e-14	AT5G20020
chr2	9443200	9444399	935	737	2.43526e-22	1.39415	7.24642e-21	AT2G22200
chr3	23374000	23374999	444	350	1.30524e-11	1.39405	7.59118e-11	AT3G63260
chr1	5854200	5854599	189	149	5.9753e-06	1.39393	1.36491e-05	AT1G17130
chr4	729800	730399	241	190	4.08546e-07	1.39389	1.13618e-06	AT4G01690
chr5	23204400	23205399	482	380	1.9419e-12	1.39389	1.28498e-11	AT5G57280
chr2	8774800	8776199	586	462	1.02933e-14	1.39386	9.86832e-14	AT2G20330
chr3	19228600	19229199	293	231	2.84925e-08	1.39386	9.60065e-08	AT3G51840
chr4	9267200	9267999	293	231	2.84925e-08	1.39386	9.60065e-08	AT4G16430
chr4	12376200	12377799	1172	924	1.84662e-27	1.39386	1.11653e-25	AT4G23750
chr2	19004800	19005599	402	317	1.14082e-10	1.39358	5.70862e-10	AT2G46280
chr1	6229800	6230199	175	138	1.25443e-05	1.39355	2.72186e-05	AT1G18100
chr5	26292200	26295399	1883	1485	8.86897e-43	1.39344	4.19613e-40	AT5G65710
chr4	807200	810399	2107	1662	1.47826e-47	1.39315	1.47242e-44	AT4G01865
chr4	807200	810399	2107	1662	1.47826e-47	1.39315	1.47242e-44	AT4G01870
chr4	807200	810399	2107	1662	1.47826e-47	1.39315	1.47242e-44	AT4G01860
chr3	7436000	7436599	393	310	1.86504e-10	1.39314	9.03169e-10	AT3G21200
chr3	489800	490999	1075	848	2.78629e-25	1.39308	1.22345e-23	AT3G02400
chr1	24156000	24157599	1004	792	9.60388e-24	1.39307	3.42285e-22	AT1G65020
chr1	24156000	24157599	1004	792	9.60388e-24	1.39307	3.42285e-22	AT1G65030
chr5	3353400	3354199	488	385	1.5835e-12	1.39291	1.06306e-11	AT5G10610
chr4	18227200	18228999	1014	800	6.07521e-24	1.39288	2.23684e-22	AT4G39120
chr4	18227200	18228999	1014	800	6.07521e-24	1.39288	2.23684e-22	AT4G39130
chr5	7941200	7941599	218	172	1.40395e-06	1.39281	3.57024e-06	AT5G23550
chr1	27082600	27083599	621	490	2.05234e-15	1.39271	2.18944e-14	AT1G71960
chr3	22331600	22332599	384	303	3.04974e-10	1.39269	1.43075e-09	AT3G60410
chr2	689800	690399	313	247	1.11901e-08	1.39255	4.03608e-08	AT2G02560
chr1	12418400	12419199	351	277	1.64054e-09	1.39249	6.8086e-09	AT1G34110
chr5	4261600	4262399	408	322	9.29565e-11	1.39242	4.72777e-10	AT5G13300
chr3	19638200	19640599	1471	1161	9.72322e-34	1.39234	1.36305e-31	AT3G52960
chr2	16811000	16812399	1025	809	3.94634e-24	1.39232	1.47598e-22	AT2G40240
chr1	24323200	24323999	541	427	1.18213e-13	1.3923	9.56882e-13	AT1G65470
chr5	20239400	20239999	337	266	3.39126e-09	1.39224	1.32795e-08	AT5G49810
chr3	17651400	17652999	760	600	2.21833e-18	1.39196	3.66014e-17	AT3G47836
chr3	17651400	17652999	760	600	2.21833e-18	1.39196	3.66014e-17	AT3G47840
chr4	8551400	8551799	190	150	6.1476e-06	1.39196	1.40257e-05	AT4G14965
chr3	21353600	21354399	518	409	3.95733e-13	1.39178	2.93581e-12	AT3G57660
chr2	17301600	17302199	442	349	1.785e-11	1.39175	1.01262e-10	AT2G41490
chr1	11659800	11660399	347	274	2.12795e-09	1.39169	8.66241e-09	AT1G32330
chr3	16447200	16448799	523	413	3.14104e-13	1.39161	2.36264e-12	AT3G44990
chr2	15194800	15196599	1241	980	1.05074e-28	1.39159	7.53232e-27	AT2G36230
chr2	15194800	15196599	1241	980	1.05074e-28	1.39159	7.53232e-27	AT2G36240
chr1	20077800	20079399	951	751	1.80658e-22	1.39157	5.4791e-21	AT1G53780
chr1	20077800	20079399	951	751	1.80658e-22	1.39157	5.4791e-21	AT1G53785
chr1	20077800	20079399	951	751	1.80658e-22	1.39157	5.4791e-21	AT1G53790
chr2	11344600	11345399	409	323	9.55041e-11	1.39151	4.84821e-10	AT2G26680
chr1	6396000	6396399	176	139	1.29071e-05	1.39143	2.79194e-05	AT1G18580
chr1	20116000	20116399	157	124	3.45176e-05	1.39137	6.98583e-05	AT1G53880
chr4	6351000	6351999	590	466	1.14598e-14	1.39133	1.09258e-13	AT4G10190
chr1	185200	187999	1699	1342	1.77326e-38	1.39125	4.59713e-36	AT1G01500
chr1	185200	187999	1699	1342	1.77326e-38	1.39125	4.59713e-36	AT1G01510
chr1	19478000	19478999	457	361	8.90875e-12	1.39115	5.34553e-11	AT1G52310
chr1	3565200	3565999	562	444	4.82311e-14	1.39097	4.14144e-13	AT1G10730
chr1	5511000	5511799	543	429	1.247e-13	1.39094	1.00595e-12	AT1G16060
chr1	17975200	17976199	362	286	1.05818e-09	1.39094	4.53491e-09	AT1G48620
chr2	17035400	17036199	443	350	1.83355e-11	1.39091	1.03892e-10	AT2G40815
chr5	8608200	8609599	786	621	7.22237e-19	1.3909	1.26911e-17	AT5G24970
chr5	8608200	8609599	786	621	7.22237e-19	1.3909	1.26911e-17	AT5G24980
chr1	104600	105399	629	497	1.76566e-15	1.39078	1.90074e-14	AT1G01250
chr5	7935400	7936799	672	531	2.10811e-16	1.39072	2.58059e-15	AT5G23535
chr1	17957000	17958399	858	678	2.13194e-20	1.39066	4.71344e-19	AT1G48580
chr1	17957000	17958399	858	678	2.13194e-20	1.39066	4.71344e-19	AT1G48570
chr5	23218200	23218799	286	226	4.94163e-08	1.39066	1.59618e-07	AT5G57330
chr4	13996000	13998199	1364	1078	3.28645e-31	1.39047	3.1098e-29	AT4G28230
chr4	13996000	13998199	1364	1078	3.28645e-31	1.39047	3.1098e-29	AT4G28240
chr5	6687000	6687799	353	279	1.73192e-09	1.39039	7.1549e-09	AT5G19780
chr3	21219000	21219799	272	215	1.02598e-07	1.39026	3.14491e-07	AT3G57340
chr1	28892200	28892999	339	268	3.5801e-09	1.39005	1.39727e-08	AT1G76920
chr1	23696800	23697799	616	487	3.71582e-15	1.39001	3.82808e-14	AT1G63850
chr1	20439400	20440199	535	423	2.08681e-13	1.38988	1.61657e-12	AT1G54780
chr2	7742800	7743799	387	306	3.30665e-10	1.38981	1.54134e-09	AT2G17820
chr5	20543600	20544799	669	529	2.79709e-16	1.38974	3.34185e-15	AT5G50450
chr3	19149000	19149999	368	291	8.61235e-10	1.38969	3.74601e-09	AT3G51630
chr3	19149000	19149999	368	291	8.61235e-10	1.38969	3.74601e-09	AT3G51632
chr3	1819000	1819599	239	189	5.6184e-07	1.38964	1.52792e-06	AT3G06030
chr1	26182400	26183199	569	450	4.03677e-14	1.38952	3.49958e-13	AT1G69600
chr5	26179200	26181199	1406	1112	5.56055e-32	1.38946	5.8463e-30	AT5G65490
chr5	26179200	26181199	1406	1112	5.56055e-32	1.38946	5.8463e-30	AT5G65495
chr5	26179200	26181199	1406	1112	5.56055e-32	1.38946	5.8463e-30	AT5G65500
chr3	16557400	16557999	330	261	5.86427e-09	1.38943	2.21652e-08	AT3G45210
chr2	6733600	6734399	354	280	1.77895e-09	1.38934	7.32997e-09	AT2G15430
chr3	6906600	6908199	708	560	4.32174e-17	1.38934	5.87986e-16	AT3G19870
chr3	16930200	16930999	531	420	2.69941e-13	1.38934	2.05084e-12	AT3G46100
chr1	9528000	9528999	445	352	1.93369e-11	1.38926	1.09011e-10	AT1G27435
chr1	23306400	23307199	493	390	1.80946e-12	1.38914	1.20366e-11	AT1G62930
chr5	4243000	4243799	383	303	4.28493e-10	1.38906	1.96778e-09	AT5G13260
chr1	6872600	6873399	474	375	4.68952e-12	1.38903	2.92998e-11	AT1G19840
chr1	1769000	1769799	407	322	1.30515e-10	1.389	6.4609e-10	AT1G05860
chr4	4828600	4829199	364	288	1.11638e-09	1.38891	4.76813e-09	AT4G07990
chr1	22499600	22499999	230	182	9.25356e-07	1.38874	2.42319e-06	AT1G61090
chr2	18772200	18772799	302	239	2.51488e-08	1.38859	8.56472e-08	AT2G45540
chr3	1941000	1941599	355	281	1.82687e-09	1.38831	7.50784e-09	AT3G06400
chr5	25895800	25896599	427	338	5.15553e-11	1.38828	2.72157e-10	AT5G64760
chr3	23344000	23344799	595	471	1.30694e-14	1.38823	1.23361e-13	AT3G63190
chr2	15453000	15453599	384	304	4.39977e-10	1.3881	2.01612e-09	AT2G36840
chr3	20235600	20236399	408	323	1.34004e-10	1.3881	6.62147e-10	AT3G54670
chr5	16462600	16463399	576	456	3.37655e-14	1.3881	2.96526e-13	AT5G41130
chr1	5138600	5140199	749	593	7.04119e-18	1.38801	1.07724e-16	AT1G14900
chr1	5138600	5140199	749	593	7.04119e-18	1.38801	1.07724e-16	AT1G14910
chr1	22307600	22308199	389	308	3.48655e-10	1.38792	1.6224e-09	AT1G60550
chr5	223600	225199	1167	924	9.77817e-27	1.38792	5.33291e-25	AT5G01580
chr5	223600	225199	1167	924	9.77817e-27	1.38792	5.33291e-25	AT5G01590
chr2	16803400	16804599	807	639	4.23768e-19	1.38783	7.80138e-18	AT2G40230
chr1	3194200	3194999	514	407	7.3619e-13	1.38782	5.22596e-12	AT1G09830
chr1	28616000	28616799	466	369	7.85445e-12	1.38779	4.75209e-11	AT1G76270
chr5	9356200	9358199	860	681	3.2164e-20	1.38777	6.89359e-19	AT5G26622
chr2	19180800	19181399	298	236	3.26422e-08	1.38761	1.08721e-07	AT2G46690
chr4	16500200	16500999	274	217	1.08281e-07	1.38757	3.30626e-07	AT4G34540
chr2	18791400	18793799	1621	1284	3.00485e-36	1.38734	6.11471e-34	AT2G45620
chr2	18791400	18793799	1621	1284	3.00485e-36	1.38734	6.11471e-34	AT2G45610
chr3	1877600	1878599	664	526	5.04821e-16	1.38723	5.84684e-15	AT3G06200
chr4	11211400	11213399	741	587	1.17435e-17	1.38722	1.7282e-16	AT4G20960
chr5	9485000	9487199	794	629	8.88953e-19	1.38719	1.54343e-17	AT5G26960
chr5	9485000	9487199	794	629	8.88953e-19	1.38719	1.54343e-17	AT5G26970
chr4	18149600	18149999	231	183	9.50727e-07	1.38716	2.4855e-06	AT4G38930
chr5	22295400	22295999	284	225	6.77179e-08	1.38708	2.13914e-07	AT5G54900
chr1	10224200	10225599	756	599	5.8893e-18	1.38695	9.15818e-17	AT1G29260
chr1	10224200	10225599	756	599	5.8893e-18	1.38695	9.15818e-17	AT1G29250
chr1	336600	338999	1069	847	1.43523e-24	1.38694	5.73031e-23	AT1G01960
chr1	336600	338999	1069	847	1.43523e-24	1.38694	5.73031e-23	AT1G01970
chr1	23192400	23192999	236	187	7.50813e-07	1.38687	1.99622e-06	AT1G62640
chr1	19603600	19604599	559	443	9.19129e-14	1.38667	7.55954e-13	AT1G52618
chr1	19603600	19604599	559	443	9.19129e-14	1.38667	7.55954e-13	AT1G52620
chr1	2472000	2472599	506	401	1.23163e-12	1.38666	8.40552e-12	AT1G07970
chr1	9512200	9512999	482	382	4.02265e-12	1.38659	2.54696e-11	AT1G27385
chr2	1481200	1482199	487	386	3.19087e-12	1.38646	2.04772e-11	AT2G04280
chr1	3104600	3105199	381	302	5.8514e-10	1.38638	2.62598e-09	AT1G09580
chr1	8817800	8820199	1143	906	4.50075e-26	1.38638	2.18402e-24	AT1G25141
chr1	8817800	8820199	1143	906	4.50075e-26	1.38638	2.18402e-24	AT1G25145
chr1	13205400	13205999	328	260	8.01988e-09	1.38633	2.95745e-08	AT1G35670
chr1	27158000	27158799	410	325	1.41189e-10	1.38633	6.94747e-10	AT1G72175
chr1	9889200	9890799	893	708	8.75409e-21	1.38606	2.04785e-19	AT1G28290
chr4	8137200	8138199	570	452	5.94064e-14	1.3858	5.02353e-13	AT4G14130
chr1	27287600	27288399	464	368	1.07035e-11	1.38559	6.32614e-11	AT1G72480
chr2	16484400	16484999	232	184	9.76485e-07	1.38559	2.54791e-06	AT2G39480
chr5	4977600	4977999	203	161	4.15253e-06	1.38559	9.75142e-06	AT5G15320
chr5	5450600	5451399	522	414	6.31142e-13	1.38559	4.52438e-12	AT5G16620
chr3	740800	741599	411	326	1.44887e-10	1.38544	7.12203e-10	AT3G03210
chr5	20151400	20153599	1243	986	4.61411e-28	1.38535	3.03202e-26	AT5G49640
chr5	20151400	20153599	1243	986	4.61411e-28	1.38535	3.03202e-26	AT5G49650
chr1	3659200	3659799	208	165	3.27528e-06	1.3853	7.84518e-06	AT1G10950
chr3	9660000	9660799	358	284	1.97615e-09	1.38525	8.07573e-09	AT3G26380
chr1	17687200	17687799	271	215	1.44399e-07	1.38515	4.32467e-07	AT1G47970
chr2	15172000	15172999	455	361	1.74634e-11	1.38506	9.91883e-11	AT2G36170
chr3	20321400	20322199	402	319	2.36699e-10	1.38484	1.12806e-09	AT3G54850
chr2	11339000	11339399	155	123	4.77091e-05	1.38481	9.45538e-05	AT2G26660
chr3	19510400	19511399	591	469	2.4189e-14	1.38478	2.18197e-13	AT3G52605
chr3	19510400	19511399	591	469	2.4189e-14	1.38478	2.18197e-13	AT3G52610
chr3	22185800	22186399	218	173	2.03879e-06	1.38476	5.05888e-06	AT3G60070
chr3	6361200	6361999	412	327	1.48656e-10	1.38457	7.29406e-10	AT3G18520
chr1	25117000	25117599	286	227	7.13734e-08	1.38454	2.24674e-07	AT1G67140
chr3	9827800	9828599	417	331	1.17818e-10	1.38444	5.8808e-10	AT3G26740
chr5	18351800	18352599	417	331	1.17818e-10	1.38444	5.8808e-10	AT5G45290
chr1	24550400	24551199	548	435	2.03647e-13	1.38438	1.58016e-12	AT1G65950
chr1	29926000	29927599	936	743	1.50395e-21	1.38437	3.99189e-20	AT1G79550
chr1	29926000	29927599	936	743	1.50395e-21	1.38437	3.99189e-20	AT1G79560
chr1	26840600	26842399	1164	924	2.6313e-26	1.38435	1.33148e-24	AT1G71210
chr1	26840600	26842399	1164	924	2.6313e-26	1.38435	1.33148e-24	AT1G71220
chr1	20323000	20323799	553	439	1.61605e-13	1.38428	1.27645e-12	AT1G54440
chr1	19651400	19652599	655	520	1.17423e-15	1.38421	1.29879e-14	AT1G52760
chr4	6346400	6347399	689	547	2.28042e-16	1.38419	2.76647e-15	AT4G10180
chr1	19298200	19298999	427	339	7.40179e-11	1.38418	3.82938e-10	AT1G51940
chr5	25724600	25725599	592	470	2.48081e-14	1.38417	2.23037e-13	AT5G64320
chr5	25648000	25649199	660	524	9.32401e-16	1.38413	1.04722e-14	AT5G64090
chr1	691800	692599	466	370	1.12642e-11	1.38404	6.63165e-11	AT1G03000
chr4	267200	267999	466	370	1.12642e-11	1.38404	6.63165e-11	AT4G00630
chr3	20105200	20105999	534	424	4.18054e-13	1.38401	3.09291e-12	AT3G54290
chr3	7885600	7888399	1408	1118	2.42047e-31	1.38397	2.33711e-29	AT3G22300
chr3	7885600	7888399	1408	1118	2.42047e-31	1.38397	2.33711e-29	AT3G22310
chr1	4374000	4375999	908	721	6.27027e-21	1.38393	1.51358e-19	AT1G12840
chr1	4374000	4375999	908	721	6.27027e-21	1.38393	1.51358e-19	AT1G12830
chr1	7478200	7479199	539	428	3.31707e-13	1.38392	2.48912e-12	AT1G21350
chr1	6503800	6506599	1287	1022	8.16364e-29	1.38386	5.98825e-27	AT1G18840
chr1	6503800	6506599	1287	1022	8.16364e-29	1.38386	5.98825e-27	AT1G18850
chr5	19837000	19838199	578	459	5.08775e-14	1.38382	4.35681e-13	AT5G48930
chr5	25423400	25424599	612	486	9.85033e-15	1.38382	9.47243e-14	AT5G63500
chr5	25423400	25424599	612	486	9.85033e-15	1.38382	9.47243e-14	AT5G63510
chr5	25628800	25629399	306	243	2.79355e-08	1.38382	9.42051e-08	AT5G64040
chr1	21035800	21036799	413	328	1.52498e-10	1.3837	7.47674e-10	AT1G56210
chr4	14369000	14370599	1103	876	5.71844e-25	1.38368	2.41566e-23	AT4G29140
chr3	19916800	19917399	209	166	3.3634e-06	1.38358	8.03591e-06	AT3G53750
chr3	20489200	20489999	418	332	1.20858e-10	1.38358	6.0151e-10	AT3G55260
chr5	13584200	13584999	418	332	1.20858e-10	1.38358	6.0151e-10	AT5G35360
chr5	226000	227599	734	583	2.8682e-17	1.38354	4.01781e-16	AT5G01590
chr5	226000	227599	734	583	2.8682e-17	1.38354	4.01781e-16	AT5G01595
chr1	2298800	2300199	525	417	6.81073e-13	1.38353	4.85473e-12	AT1G07480
chr2	9501400	9502199	350	278	3.31792e-09	1.38353	1.30098e-08	AT2G22370
chr3	1038800	1039399	350	278	3.31792e-09	1.38353	1.30098e-08	AT3G04010
chr4	15662400	15664999	929	738	2.56512e-21	1.38332	6.57791e-20	AT4G32450
chr4	15662400	15664999	929	738	2.56512e-21	1.38332	6.57791e-20	AT4G32460
chr2	9576800	9577399	253	201	3.90068e-07	1.38321	1.0896e-06	AT2G22530
chr1	21689000	21689799	438	348	4.77041e-11	1.38312	2.53596e-10	AT1G58380
chr1	28530200	28530799	219	174	2.09325e-06	1.38312	5.18111e-06	AT1G76010
chr3	2479000	2480199	730	580	3.70209e-17	1.38312	5.08064e-16	AT3G07770
chr3	17233000	17234999	813	646	7.04094e-19	1.383	1.23896e-17	AT3G46790
chr3	17233000	17234999	813	646	7.04094e-19	1.383	1.23896e-17	AT3G46800
chr5	5160800	5162799	813	646	7.04094e-19	1.383	1.23896e-17	AT5G15815
chr5	5160800	5162799	813	646	7.04094e-19	1.383	1.23896e-17	AT5G15820
chr5	5160800	5162799	813	646	7.04094e-19	1.383	1.23896e-17	AT5G15810
chr2	17045000	17045799	409	325	1.97378e-10	1.38294	9.53144e-10	AT2G40840
chr1	2824400	2825999	672	534	6.18072e-16	1.38291	7.0934e-15	AT1G08820
chr1	9487200	9488199	336	267	6.86022e-09	1.38291	2.55973e-08	AT1G27320
chr3	3096600	3098199	1047	832	9.89361e-24	1.38289	3.51288e-22	AT3G10040
chr1	4495000	4495799	492	391	3.62381e-12	1.38278	2.30678e-11	AT1G13180
chr5	7025800	7026599	775	616	4.6616e-18	1.38257	7.3395e-17	AT5G20740
chr4	13504000	13506199	1087	864	1.57935e-24	1.38255	6.2399e-23	AT4G26860
chr4	13504000	13506199	1087	864	1.57935e-24	1.38255	6.2399e-23	AT4G26870
chr1	22542600	22543199	273	217	1.52099e-07	1.38251	4.54017e-07	AT1G61150
chr2	6832800	6833599	429	341	7.78637e-11	1.38251	4.01627e-10	AT2G15690
chr5	25361800	25362399	351	279	3.40354e-09	1.38251	1.33193e-08	AT5G63260
chr1	343400	344399	785	624	2.94195e-18	1.38245	4.77498e-17	AT1G01990
chr5	6006000	6007399	707	562	1.23103e-16	1.38244	1.55522e-15	AT5G18170
chr3	3839200	3839999	556	442	1.74242e-13	1.38235	1.36657e-12	AT3G12050
chr2	15016600	15017399	444	353	3.87797e-11	1.38221	2.0915e-10	AT2G35720
chr3	17750800	17751399	244	194	6.41631e-07	1.38214	1.72313e-06	AT3G48070
chr5	2580400	2581199	410	326	2.02417e-10	1.38207	9.7524e-10	AT5G08060
chr5	5252600	5253599	903	718	1.12345e-20	1.38206	2.60236e-19	AT5G16080
chr1	29902400	29903999	869	691	5.75288e-20	1.38199	1.18987e-18	AT1G79500
chr1	29902400	29903999	869	691	5.75288e-20	1.38199	1.18987e-18	AT1G79490
chr3	1272200	1274399	1289	1025	1.2192e-28	1.38195	8.67422e-27	AT3G04680
chr3	1272200	1274399	1289	1025	1.2192e-28	1.38195	8.67422e-27	AT3G04690
chr3	17457800	17458599	459	365	1.93227e-11	1.38193	1.08996e-10	AT3G47380
chr3	3458400	3459199	503	400	2.33736e-12	1.38189	1.52375e-11	AT3G11030
chr2	8436000	8436599	337	268	7.03674e-09	1.38185	2.6194e-08	AT2G19470
chr5	25669800	25671399	1226	975	2.51494e-27	1.38182	1.4967e-25	AT5G64150
chr5	25669800	25671399	1226	975	2.51494e-27	1.38182	1.4967e-25	AT5G64160
chr3	7481400	7482799	762	606	9.76988e-18	1.38181	1.45587e-16	AT3G21280
chr3	7481400	7482799	762	606	9.76988e-18	1.38181	1.45587e-16	AT3G21290
chr4	9597400	9598999	806	641	1.20118e-18	1.38179	2.05536e-17	AT4G17070
chr5	9633000	9634999	1295	1030	9.93579e-29	1.38165	7.2044e-27	AT5G27330
chr3	21946000	21946799	440	350	5.01605e-11	1.38149	2.65164e-10	AT3G59390
chr5	25718200	25718999	308	245	2.94016e-08	1.38149	9.87973e-08	AT5G64300
chr1	23666400	23667399	626	498	6.85701e-15	1.38137	6.73076e-14	AT1G63780
chr5	7830400	7830999	318	253	1.84017e-08	1.38125	6.3958e-08	AT5G23250
chr4	17724000	17724799	411	327	2.0755e-10	1.38121	9.98955e-10	AT4G37730
chr3	2244400	2244799	186	148	1.1649e-05	1.38107	2.54365e-05	AT3G07090
chr1	25286000	25286799	377	300	1.08679e-09	1.38097	4.65014e-09	AT1G67490
chr5	26766200	26766999	519	413	1.19577e-12	1.38096	8.18147e-12	AT5G67060
chr3	3369800	3370799	382	304	8.60771e-10	1.38088	3.74485e-09	AT3G10760
chr2	18207400	18208399	431	343	8.18569e-11	1.38085	4.20163e-10	AT2G43970
chr2	18207400	18208399	431	343	8.18569e-11	1.38085	4.20163e-10	AT2G43980
chr1	9373400	9374599	392	312	5.40078e-10	1.38069	2.43908e-09	AT1G27000
chr2	12135400	12136199	392	312	5.40078e-10	1.38069	2.43908e-09	AT2G28380
chr1	16468000	16468799	397	316	4.27842e-10	1.3806	1.96575e-09	AT1G43670
chr4	10781400	10782399	525	418	9.7219e-13	1.38022	6.75429e-12	AT4G19865
chr5	21311000	21311599	422	336	1.33604e-10	1.38019	6.60345e-10	AT5G52520
chr1	9779200	9779999	378	301	1.11421e-09	1.38003	4.761e-09	AT1G28060
chr1	27113400	27115599	1090	868	2.41351e-24	1.37998	9.24608e-23	AT1G72040
chr1	27113400	27115599	1090	868	2.41351e-24	1.37998	9.24608e-23	AT1G72050
chr4	11105400	11105999	275	219	1.60044e-07	1.37992	4.76157e-07	AT4G20720
chr1	1907200	1907799	221	176	2.20444e-06	1.37989	5.4343e-06	AT1G06230
chr1	7272600	7273999	781	622	5.39914e-18	1.37983	8.43059e-17	AT1G20900
chr2	16945600	16946999	560	446	1.92313e-13	1.37981	1.50177e-12	AT2G40590
chr2	16945600	16946999	560	446	1.92313e-13	1.37981	1.50177e-12	AT2G40600
chr5	4164000	4164799	560	446	1.92313e-13	1.37981	1.50177e-12	AT5G13120
chr2	10863000	10863999	565	450	1.52593e-13	1.37975	1.20931e-12	AT2G25530
chr1	29627400	29627999	285	227	9.99939e-08	1.3797	3.07355e-07	AT1G78800
chr3	2455200	2455799	290	231	7.90533e-08	1.37959	2.47001e-07	AT3G07680
chr5	8756400	8756999	305	243	3.90892e-08	1.3793	1.28342e-07	AT5G25265
chr2	4802200	4803399	556	443	2.48364e-13	1.37923	1.90218e-12	AT2G11890
chr3	19301800	19302599	433	345	8.60005e-11	1.37922	4.38932e-10	AT3G52030
chr2	19307800	19308399	374	298	1.44221e-09	1.37918	6.04245e-09	AT2G46990
chr2	10281800	10282799	512	408	2.04578e-12	1.37903	1.34994e-11	AT2G24180
chr4	14469600	14470199	320	255	1.93469e-08	1.37903	6.70586e-08	AT4G29410
chr1	26048600	26049399	709	565	1.83944e-16	1.37899	2.27525e-15	AT1G69290
chr5	8982400	8982999	325	259	1.53067e-08	1.37895	5.39191e-08	AT5G25800
chr5	25345600	25346199	325	259	1.53067e-08	1.37895	5.39191e-08	AT5G63190
chr5	1779200	1779799	330	263	1.21114e-08	1.37887	4.34767e-08	AT5G05920
chr4	10081400	10082599	532	424	8.09789e-13	1.37883	5.70136e-12	AT4G18230
chr4	10081400	10082599	532	424	8.09789e-13	1.37883	5.70136e-12	AT4G18240
chr5	26749000	26751799	1404	1119	1.26558e-30	1.3788	1.1515e-28	AT5G67010
chr5	26749000	26751799	1404	1119	1.26558e-30	1.3788	1.1515e-28	AT5G67020
chr4	95200	98399	1542	1229	1.98804e-33	1.37879	2.66834e-31	AT4G00230
chr4	95200	98399	1542	1229	1.98804e-33	1.37879	2.66834e-31	AT4G00231
chr1	3895000	3896999	887	707	4.4104e-20	1.3787	9.23306e-19	AT1G11592
chr1	20070400	20070999	276	220	1.64109e-07	1.37864	4.8695e-07	AT1G53760
chr3	2042200	2042999	345	275	6.00305e-09	1.37864	2.26446e-08	AT3G06550
chr2	8303800	8304399	355	283	3.76135e-09	1.3785	1.46288e-08	AT2G19146
chr3	19798000	19798999	518	413	1.66246e-12	1.3783	1.11134e-11	AT3G53400
chr3	19798000	19798999	518	413	1.66246e-12	1.3783	1.11134e-11	AT3G53402
chr2	16974000	16974799	676	539	9.69981e-16	1.37823	1.08492e-14	AT2G40690
chr4	18257400	18257799	158	126	5.16712e-05	1.37801	0.00010182	AT4G39200
chr1	12069600	12070399	479	382	1.08903e-11	1.37796	6.42452e-11	AT1G33270
chr5	9149000	9149799	563	449	2.06825e-13	1.37793	1.60351e-12	AT5G26180
chr2	16430400	16432399	1156	922	1.77629e-25	1.37782	8.11986e-24	AT2G39350
chr2	8059200	8060799	776	619	9.64939e-18	1.37764	1.43904e-16	AT2G18560
chr1	24241800	24242399	346	276	6.15236e-09	1.37763	2.31662e-08	AT1G65270
chr3	18331600	18331999	173	138	2.5139e-05	1.37763	5.20007e-05	AT3G49430
chr1	27263000	27263599	262	209	3.41084e-07	1.37759	9.6157e-07	AT1G72420
chr3	3806000	3807399	875	698	9.44386e-20	1.37758	1.89127e-18	AT3G11964
chr3	19841600	19842199	356	284	3.85469e-09	1.37751	1.49457e-08	AT3G53520
chr3	20604800	20606599	801	639	3.05116e-18	1.37751	4.93532e-17	AT3G55560
chr5	9433600	9434399	460	367	2.82439e-11	1.37739	1.55563e-10	AT5G26820
chr2	12378400	12379199	277	221	1.68236e-07	1.37737	4.98336e-07	AT2G28840
chr3	17136800	17137799	485	387	8.8455e-12	1.37719	5.30927e-11	AT3G46550
chr3	4273800	4274399	292	233	8.3079e-08	1.37718	2.58767e-07	AT3G13235
chr3	7041200	7042599	693	553	5.09246e-16	1.37712	5.89088e-15	AT3G20170
chr4	12316000	12316799	604	482	3.32987e-14	1.37707	2.92561e-13	AT4G23620
chr1	30156800	30157599	505	403	3.49721e-12	1.37705	2.22994e-11	AT1G80180
chr2	14754200	14754799	406	324	3.73878e-10	1.37704	1.73083e-09	AT2G35010
chr1	23760000	23760599	312	249	3.24818e-08	1.37696	1.08206e-07	AT1G64040
chr3	6183800	6184599	525	419	1.38362e-12	1.37692	9.37857e-12	AT3G18060
chr5	594400	594999	421	336	1.85921e-10	1.37692	9.00579e-10	AT5G02640
chr1	1779400	1779999	317	253	2.56919e-08	1.3769	8.73552e-08	AT1G05890
chr4	15585800	15586399	213	170	3.72766e-06	1.37688	8.84034e-06	AT4G32285
chr3	21404600	21406999	857	684	2.4849e-19	1.37686	4.71211e-18	AT3G57785
chr3	21404600	21406999	857	684	2.4849e-19	1.37686	4.71211e-18	AT3G57790
chr2	900200	901599	763	609	2.01953e-17	1.3768	2.88667e-16	AT2G03050
chr2	900200	901599	763	609	2.01953e-17	1.3768	2.88667e-16	AT2G03060
chr2	11092400	11093199	327	261	1.60783e-08	1.3768	5.64741e-08	AT2G26030
chr2	17919000	17919599	332	265	1.27212e-08	1.37676	4.54928e-08	AT2G43090
chr1	1336600	1337799	565	451	2.16976e-13	1.37669	1.67877e-12	AT1G04770
chr1	4954000	4954999	764	610	2.06781e-17	1.37635	2.94901e-16	AT1G14470
chr5	25490000	25490799	382	305	1.22879e-09	1.37635	5.20709e-09	AT5G63680
chr3	5103400	5105199	968	773	1.61772e-21	1.37613	4.27588e-20	AT3G15150
chr3	5103400	5105199	968	773	1.61772e-21	1.37613	4.27588e-20	AT3G15160
chr5	16029800	16030399	422	337	1.90447e-10	1.37609	9.21557e-10	AT5G40040
chr3	7404800	7405399	283	226	1.36266e-07	1.37608	4.09858e-07	AT3G21110
chr5	7987400	7988399	596	476	5.54492e-14	1.37595	4.71842e-13	AT5G23690
chr3	20169400	20170399	755	603	3.35645e-17	1.37592	4.65013e-16	AT3G54470
chr4	9401000	9401399	164	131	4.1679e-05	1.37574	8.3336e-05	AT4G16720
chr5	25134200	25134799	328	262	1.64735e-08	1.37574	5.77871e-08	AT5G62610
chr3	7182000	7182599	333	266	1.30335e-08	1.37571	4.65131e-08	AT3G20560
chr3	4074400	4075599	348	278	6.45847e-09	1.37562	2.42321e-08	AT3G12820
chr5	12088200	12088599	174	139	2.57862e-05	1.37562	5.32581e-05	AT5G32470
chr3	3359800	3360799	547	437	5.74419e-13	1.37553	4.13971e-12	AT3G10730
chr1	10462000	10463999	915	731	2.12425e-20	1.37552	4.70191e-19	AT1G29880
chr1	10462000	10463999	915	731	2.12425e-20	1.37552	4.70191e-19	AT1G29890
chr4	16456600	16457199	398	318	6.25222e-10	1.37537	2.78867e-09	AT4G34419
chr2	10820400	10820999	214	171	3.82161e-06	1.37525	9.04614e-06	AT2G25420
chr3	20826800	20827399	239	191	1.16751e-06	1.37508	3.00777e-06	AT3G56130
chr5	16945200	16945799	259	207	4.5361e-07	1.37497	1.25103e-06	AT5G42390
chr2	19369200	19370599	847	677	5.57182e-19	1.37486	9.9478e-18	AT2G47180
chr5	8058600	8059199	314	251	3.40966e-08	1.37474	1.13107e-07	AT5G23890
chr5	6868200	6869199	648	518	5.7626e-15	1.37471	5.7308e-14	AT5G20320
chr2	14913000	14915599	1386	1108	9.36084e-30	1.37464	7.76991e-28	AT2G35490
chr2	14913000	14915599	1386	1108	9.36084e-30	1.37464	7.76991e-28	AT2G35500
chr3	2294800	2295399	369	295	2.59699e-09	1.37458	1.03841e-08	AT3G07210
chr5	3167400	3168199	414	331	3.18231e-10	1.37448	1.48851e-09	AT5G10110
chr2	788000	788799	419	335	2.52109e-10	1.37447	1.19728e-09	AT2G02790
chr5	21483000	21484799	898	718	5.71416e-20	1.37441	1.18316e-18	AT5G52980
chr5	21483000	21484799	898	718	5.71416e-20	1.37441	1.18316e-18	AT5G52990
chr4	15164400	15165999	918	734	2.27762e-20	1.37439	5.00046e-19	AT4G31200
chr4	15164400	15165999	918	734	2.27762e-20	1.37439	5.00046e-19	AT4G31210
chr4	13159800	13160599	469	375	2.46291e-11	1.37438	1.37171e-10	AT4G25890
chr5	23022000	23023799	1173	938	1.86865e-25	1.37423	8.48063e-24	AT5G56910
chr5	23022000	23023799	1173	938	1.86865e-25	1.37423	8.48063e-24	AT5G56900
chr1	2221800	2222799	589	471	9.44988e-14	1.37423	7.75874e-13	AT1G07230
chr1	2076600	2077799	844	675	7.34657e-19	1.37405	1.28974e-17	AT1G06760
chr5	2519600	2521199	949	759	5.86785e-21	1.37401	1.42188e-19	AT5G07890
chr5	2519600	2521199	949	759	5.86785e-21	1.37401	1.42188e-19	AT5G07900
chr1	19421000	19421599	230	184	1.9214e-06	1.37365	4.78076e-06	AT1G52160
chr2	1076800	1077999	790	632	9.46413e-18	1.37365	1.41364e-16	AT2G03550
chr2	10126600	10127599	505	404	4.96439e-12	1.37365	3.08745e-11	AT2G23790
chr2	11071000	11071399	190	152	1.2894e-05	1.37365	2.78942e-05	AT2G25964
chr2	11620200	11621599	460	368	4.01323e-11	1.37365	2.16013e-10	AT2G27180
chr2	11620200	11621599	460	368	4.01323e-11	1.37365	2.16013e-10	AT2G27190
chr3	2145000	2146999	965	772	3.01323e-21	1.37365	7.66469e-20	AT3G06790
chr3	2145000	2146999	965	772	3.01323e-21	1.37365	7.66469e-20	AT3G06810
chr3	17715600	17716199	320	256	2.76205e-08	1.37365	9.32094e-08	AT3G47990
chr4	154800	155399	245	196	9.44222e-07	1.37365	2.4702e-06	AT4G00355
chr4	1336400	1337399	635	508	1.20737e-14	1.37365	1.14706e-13	AT4G03030
chr4	6029400	6029799	185	148	1.63763e-05	1.37365	3.48579e-05	AT4G09530
chr4	6286800	6287199	215	172	3.91669e-06	1.37365	9.24692e-06	AT4G10050
chr4	11889600	11890799	720	576	2.38506e-16	1.37365	2.88786e-15	AT4G22580
chr5	2769400	2770399	590	472	9.67262e-14	1.37365	7.92443e-13	AT5G08550
chr5	15522600	15523199	355	284	5.36174e-09	1.37365	2.04085e-08	AT5G38750
chr5	19072000	19072399	165	132	4.27415e-05	1.37365	8.53252e-05	AT5G47010
chr1	23739800	23740999	636	509	1.23564e-14	1.37311	1.17157e-13	AT1G63970
chr1	23739800	23740999	636	509	1.23564e-14	1.37311	1.17157e-13	AT1G63980
chr4	2387200	2387999	556	445	5.00389e-13	1.37303	3.64927e-12	AT4G04700
chr4	5820400	5822399	1112	890	4.04239e-24	1.37303	1.50595e-22	AT4G09140
chr5	19586000	19586799	521	417	2.53392e-12	1.37299	1.64115e-11	AT5G48330
chr3	3928600	3929399	511	409	4.02934e-12	1.37297	2.55034e-11	AT3G12340
chr5	25966800	25967399	446	357	8.25268e-11	1.37288	4.23258e-10	AT5G65000
chr5	10316000	10316999	441	353	1.04143e-10	1.37287	5.25293e-10	AT5G28340
chr3	1156400	1158399	1213	971	4.207e-26	1.3728	2.06263e-24	AT3G04350
chr3	1156400	1158399	1213	971	4.207e-26	1.3728	2.06263e-24	AT3G04360
chr5	10683200	10683799	371	297	2.72278e-09	1.37272	1.08527e-08	AT5G28660
chr5	7203400	7203999	366	293	3.43947e-09	1.37271	1.3446e-08	AT5G21160
chr3	21944200	21944799	351	281	6.93658e-09	1.37267	2.58364e-08	AT3G59380
chr1	23730000	23730799	326	261	2.23714e-08	1.37259	7.68522e-08	AT1G63940
chr2	78000	78799	572	458	2.55662e-13	1.37245	1.95412e-12	AT2G01080
chr1	24129800	24130799	562	450	4.06228e-13	1.37242	3.00895e-12	AT1G64960
chr3	21693200	21693799	281	225	1.8536e-07	1.37242	5.44966e-07	AT3G58640
chr5	21211400	21211999	276	221	2.34598e-07	1.3724	6.78863e-07	AT5G52230
chr1	651200	651799	256	205	6.02814e-07	1.37231	1.62603e-06	AT1G02890
chr4	13098400	13099599	758	607	5.08738e-17	1.37229	6.83312e-16	AT4G25710
chr5	10454400	10455199	482	386	1.65998e-11	1.37222	9.47663e-11	AT5G28490
chr5	22301000	22302599	824	660	2.60467e-18	1.37198	4.25309e-17	AT5G54920
chr5	22301000	22302599	824	660	2.60467e-18	1.37198	4.25309e-17	AT5G54910
chr2	19125000	19125799	407	326	5.44156e-10	1.37196	2.45603e-09	AT2G46560
chr1	28104200	28105199	573	459	2.61607e-13	1.37185	1.99392e-12	AT1G74800
chr1	1688800	1689799	553	443	6.60584e-13	1.37179	4.71579e-12	AT1G05640
chr1	755600	756999	905	725	6.70764e-20	1.37175	1.37831e-18	AT1G03140
chr1	755600	756999	905	725	6.70764e-20	1.37175	1.37831e-18	AT1G03150
chr5	21864200	21865999	880	705	2.11876e-19	1.3717	4.05845e-18	AT5G53850
chr5	21864200	21865999	880	705	2.11876e-19	1.3717	4.05845e-18	AT5G53860
chr5	4841200	4841799	347	278	8.97337e-09	1.37167	3.28347e-08	AT5G14950
chr2	15555800	15556799	513	411	4.21987e-12	1.37164	2.6576e-11	AT2G37035
chr2	17805400	17805999	342	274	1.13404e-08	1.37164	4.08639e-08	AT2G42790
chr3	16163800	16164599	332	266	1.81175e-08	1.37158	6.30399e-08	AT3G44590
chr1	17466400	17467399	649	520	8.33861e-15	1.37153	8.09273e-14	AT1G47560
chr5	3494400	3495999	800	641	8.42748e-18	1.3715	1.27388e-16	AT5G11030
chr5	3494400	3495999	800	641	8.42748e-18	1.3715	1.27388e-16	AT5G11040
chr1	2701000	2701799	463	371	4.30286e-11	1.37142	2.30228e-10	AT1G08530
chr4	16255200	16255599	307	246	5.85545e-08	1.37141	1.86997e-07	AT4G33905
chr3	22855800	22856999	901	722	8.63542e-20	1.37136	1.73857e-18	AT3G61740
chr2	14849400	14851199	756	606	6.85805e-17	1.37093	9.05713e-16	AT2G35260
chr1	24957400	24957999	247	198	9.90508e-07	1.37087	2.57952e-06	AT1G66890
chr5	23460200	23461199	368	295	3.60362e-09	1.37085	1.40558e-08	AT5G57940
chr5	23460200	23461199	368	295	3.60362e-09	1.37085	1.40558e-08	AT5G57950
chr2	10170200	10171199	363	291	4.55263e-09	1.37081	1.7519e-08	AT2G23890
chr5	26378200	26380999	1442	1156	2.1531e-30	1.37079	1.89523e-28	AT5G65950
chr5	26378200	26380999	1442	1156	2.1531e-30	1.37079	1.89523e-28	AT5G65940
chr3	15828800	15829799	580	465	2.1724e-13	1.37069	1.68013e-12	AT3G44070
chr1	28590200	28591199	449	360	8.84508e-11	1.37059	4.51194e-10	AT1G76185
chr3	1862000	1863999	893	716	1.431e-19	1.37058	2.80059e-18	AT3G06150
chr5	2855600	2857399	1100	882	1.21281e-23	1.37053	4.24261e-22	AT5G08760
chr5	2855600	2857399	1100	882	1.21281e-23	1.37053	4.24261e-22	AT5G08770
chr5	2855600	2857399	1100	882	1.21281e-23	1.37053	4.24261e-22	AT5G08780
chr5	23479800	23480399	328	263	2.34433e-08	1.37051	8.02142e-08	AT5G58003
chr3	18455400	18456199	434	348	1.77788e-10	1.37049	8.64277e-10	AT3G49760
chr5	17544000	17544599	323	259	2.96393e-08	1.37046	9.949e-08	AT5G43680
chr2	7073200	7073399	106	85	0.000812186	1.37041	0.00132368	AT2G16340
chr5	2109800	2110999	424	340	2.83247e-10	1.37041	1.33278e-09	AT5G06810
chr1	28855000	28855799	419	336	3.57552e-10	1.37037	1.66135e-09	AT1G76860
chr2	18034400	18034999	414	332	4.51379e-10	1.37034	2.06187e-09	AT2G43420
chr2	7256000	7256599	298	239	9.59045e-08	1.3702	2.95842e-07	AT2G16720
chr2	17935200	17935799	394	316	1.14722e-09	1.37017	4.88878e-09	AT2G43140
chr3	1829400	1830199	490	393	1.40971e-11	1.37015	8.16861e-11	AT3G06060
chr3	17161600	17162399	485	389	1.77822e-11	1.37011	1.00908e-10	AT3G46610
chr3	14084800	14085999	571	458	3.53071e-13	1.37005	2.6348e-12	AT3G33530
chr3	8842000	8842799	475	381	2.82986e-11	1.37004	1.55819e-10	AT3G24360
chr1	7759400	7760599	1026	823	3.88394e-22	1.36997	1.12048e-20	AT1G22030
chr2	19011600	19012599	839	673	1.83969e-18	1.36997	3.0621e-17	AT2G46310
chr2	133800	134399	278	223	2.45911e-07	1.36995	7.09322e-07	AT2G01250
chr3	9792000	9793799	814	653	5.81768e-18	1.36986	9.0617e-17	AT3G26630
chr3	9792000	9793799	814	653	5.81768e-18	1.36986	9.0617e-17	AT3G26640
chr2	14830600	14831599	627	503	2.83421e-14	1.36982	2.52471e-13	AT2G35190
chr3	6402400	6403399	627	503	2.83421e-14	1.36982	2.52471e-13	AT3G18600
chr1	5590000	5592399	1431	1148	4.67793e-30	1.36982	3.96994e-28	AT1G16340
chr1	5590000	5592399	1431	1148	4.67793e-30	1.36982	3.96994e-28	AT1G16350
chr1	19887800	19888199	177	142	2.77648e-05	1.36978	5.70272e-05	AT1G53310
chr4	17286800	17288999	1320	1059	7.06775e-28	1.36975	4.54956e-26	AT4G36660
chr4	17286800	17288999	1320	1059	7.06775e-28	1.36975	4.54956e-26	AT4G36670
chr5	4706000	4707799	951	763	1.21952e-20	1.36968	2.80089e-19	AT5G14590
chr5	4706000	4707799	951	763	1.21952e-20	1.36968	2.80089e-19	AT5G14600
chr2	19696200	19696799	258	207	6.31977e-07	1.36966	1.69865e-06	AT2G48160
chr4	8872800	8873799	420	337	3.65814e-10	1.36957	1.6964e-09	AT4G15540
chr5	17340400	17341599	567	455	4.55218e-13	1.36942	3.34303e-12	AT5G43190
chr1	1450200	1450799	314	252	4.85014e-08	1.36928	1.56904e-07	AT1G05055
chr1	18252000	18252999	471	378	3.65206e-11	1.36928	1.97416e-10	AT1G49340
chr3	17680800	17681799	547	439	1.14984e-12	1.36926	7.89864e-12	AT3G47910
chr2	14119600	14121199	851	683	1.21384e-18	1.36922	2.07515e-17	AT2G33320
chr5	8639600	8640199	309	248	6.1341e-08	1.36921	1.95303e-07	AT5G25060
chr3	19446800	19447799	613	492	5.8001e-14	1.36918	4.91677e-13	AT3G52460
chr5	21505200	21505999	613	492	5.8001e-14	1.36918	4.91677e-13	AT5G53030
chr3	5219200	5220199	380	305	2.3645e-09	1.36914	9.54321e-09	AT3G15470
chr3	20438800	20439399	370	297	3.773e-09	1.36902	1.4668e-08	AT3G55140
chr4	17986400	17987799	654	525	9.33392e-15	1.36894	9.02167e-14	AT4G38430
chr4	13853400	13854199	578	464	2.9299e-13	1.36891	2.21086e-12	AT4G27800
chr5	19316600	19318399	1156	928	1.39639e-24	1.36891	5.58705e-23	AT5G47690
chr5	19316600	19318399	1156	928	1.39639e-24	1.36891	5.58705e-23	AT5G47680
chr1	26275400	26276199	497	399	1.16932e-11	1.36883	6.8618e-11	AT1G69800
chr2	14208200	14208999	284	228	1.98851e-07	1.36883	5.81466e-07	AT2G33540
chr4	18209400	18209999	213	171	5.33905e-06	1.36883	1.23282e-05	AT4G39080
chr5	25443400	25445399	1562	1254	1.74472e-32	1.36883	2.01334e-30	AT5G63550
chr5	25443400	25445399	1562	1254	1.74472e-32	1.36883	2.01334e-30	AT5G63540
chr4	16701800	16703199	548	440	1.17593e-12	1.36865	8.06907e-12	AT4G35090
chr1	9719800	9720599	472	379	3.73534e-11	1.36857	2.01687e-10	AT1G27900
chr2	18685400	18687199	914	734	8.20196e-20	1.36841	1.65836e-18	AT2G45320
chr2	18685400	18687199	914	734	8.20196e-20	1.36841	1.65836e-18	AT2G45330
chr2	16114000	16115399	1275	1024	7.80717e-27	1.36828	4.3076e-25	AT2G38490
chr2	17914200	17914799	249	200	1.03797e-06	1.36815	2.69201e-06	AT2G43070
chr1	11681800	11682599	559	449	7.56549e-13	1.36814	5.36042e-12	AT1G32380
chr4	13082400	13084199	864	694	8.18583e-19	1.3681	1.42649e-17	AT4G25650
chr4	13082400	13084199	864	694	8.18583e-19	1.3681	1.42649e-17	AT4G25660
chr5	24226200	24226799	305	245	7.93892e-08	1.36804	2.47846e-07	AT5G60160
chr4	314400	315199	605	486	9.63172e-14	1.36799	7.89776e-13	AT4G00750
chr4	18032800	18033599	361	290	6.16088e-09	1.36796	2.31937e-08	AT4G38570
chr3	21757800	21758799	600	482	1.21388e-13	1.36795	9.80061e-13	AT3G58840
chr4	16772400	16773399	646	519	1.549e-14	1.36782	1.44408e-13	AT4G35250
chr3	337800	339399	997	801	2.21425e-21	1.36781	5.76405e-20	AT3G02010
chr4	15568400	15568799	173	139	3.61538e-05	1.36772	7.29748e-05	AT4G32240
chr3	2381200	2382199	789	634	2.589e-17	1.36758	3.66195e-16	AT3G07440
chr4	8646200	8646999	555	446	9.75204e-13	1.36749	6.77275e-12	AT4G15160
chr1	12158400	12158999	265	213	5.22633e-07	1.3672	1.42869e-06	AT1G33520
chr4	13515400	13516199	530	426	3.10745e-12	1.3672	1.99622e-11	AT4G26900
chr1	6123600	6124399	347	279	1.27163e-08	1.36675	4.5484e-08	AT1G17780
chr3	16034400	16035199	495	398	1.57695e-11	1.36674	9.04906e-11	AT3G44370
chr1	10651000	10651599	245	197	1.34583e-06	1.36667	3.43492e-06	AT1G30260
chr5	24144600	24145199	235	189	2.16199e-06	1.36638	5.33939e-06	AT5G59960
chr4	14213000	14213599	281	226	2.63457e-07	1.36635	7.56245e-07	AT4G28770
chr2	7398200	7399799	741	596	2.71136e-16	1.36627	3.24557e-15	AT2G17020
chr2	7398200	7399799	741	596	2.71136e-16	1.36627	3.24557e-15	AT2G17030
chr1	1463000	1463799	455	366	1.01223e-10	1.36614	5.12065e-10	AT1G05090
chr5	8282600	8283799	762	613	1.1018e-16	1.36603	1.40131e-15	AT5G24318
chr2	9141400	9142399	670	539	6.71201e-15	1.366	6.60555e-14	AT2G21380
chr1	5132600	5133199	266	214	5.34663e-07	1.36594	1.46031e-06	AT1G14880
chr3	2833200	2833999	532	428	3.24739e-12	1.36594	2.07835e-11	AT3G09230
chr1	3011400	3012399	706	568	1.36295e-15	1.36591	1.4927e-14	AT1G09320
chr1	30248400	30248999	220	177	4.40862e-06	1.36588	1.03074e-05	AT1G80460
chr4	16988400	16988999	302	243	1.05081e-07	1.36573	3.21476e-07	AT4G35860
chr1	11907600	11908999	1029	828	8.17262e-22	1.36568	2.27451e-20	AT1G32860
chr5	6756800	6757599	343	276	1.64359e-08	1.36568	5.76766e-08	AT5G20000
chr4	1292600	1293399	384	309	2.58677e-09	1.36564	1.03454e-08	AT4G02920
chr1	12433800	12434799	589	474	2.65365e-13	1.36553	2.02012e-12	AT1G34140
chr5	2710000	2710599	415	334	6.52116e-10	1.36542	2.90247e-09	AT5G08410
chr1	18561800	18562399	287	231	2.12894e-07	1.36532	6.19467e-07	AT1G50120
chr3	4572000	4575199	1968	1584	8.6565e-40	1.36532	2.7304e-37	AT3G13880
chr3	4572000	4575199	1968	1584	8.6565e-40	1.36532	2.7304e-37	AT3G13882
chr5	8079200	8079799	364	293	6.5885e-09	1.36521	2.46808e-08	AT5G23940
chr5	15974200	15975599	687	553	3.5063e-15	1.3652	3.63002e-14	AT5G39890
chr5	1782600	1783399	323	260	4.19879e-08	1.36519	1.37454e-07	AT5G05930
chr2	8490200	8492399	1251	1007	4.92808e-26	1.36519	2.37918e-24	AT2G19630
chr2	8490200	8492399	1251	1007	4.92808e-26	1.36519	2.37918e-24	AT2G19640
chr4	11990400	11991399	605	487	1.35458e-13	1.36518	1.08717e-12	AT4G22830
chr1	3431600	3432599	682	549	4.41687e-15	1.36514	4.49889e-14	AT1G10450
chr3	2315200	2315999	441	355	2.07977e-10	1.36513	1.00076e-09	AT3G07270
chr5	26409400	26411199	759	611	1.44875e-16	1.3651	1.81814e-15	AT5G66030
chr5	26409400	26411199	759	611	1.44875e-16	1.3651	1.81814e-15	AT5G66040
chr5	24090800	24092199	867	698	1.22605e-18	1.36499	2.09414e-17	AT5G59790
chr3	1001400	1002599	626	504	5.48852e-14	1.36492	4.67463e-13	AT3G03890
chr4	16680400	16681199	349	281	1.32955e-08	1.36485	4.73499e-08	AT4G35040
chr5	18181400	18182399	503	405	1.33524e-11	1.36483	7.74898e-11	AT5G45050
chr5	18181400	18182399	503	405	1.33524e-11	1.36483	7.74898e-11	AT5G45060
chr2	8083600	8084999	991	798	5.35904e-21	1.36469	1.30527e-19	AT2G18640
chr1	20451600	20452199	226	182	3.55594e-06	1.36459	8.46973e-06	AT1G54830
chr3	19505600	19506199	226	182	3.55594e-06	1.36459	8.46973e-06	AT3G52590
chr1	18425800	18426599	411	331	8.4161e-10	1.36452	3.66908e-09	AT1G49770
chr2	11105800	11107199	596	480	2.19866e-13	1.36449	1.69766e-12	AT2G26070
chr3	6658000	6659799	1182	952	1.24754e-24	1.36441	5.03406e-23	AT3G19210
chr3	6658000	6659799	1182	952	1.24754e-24	1.36441	5.03406e-23	AT3G19220
chr3	16870800	16872599	1177	948	1.56914e-24	1.36437	6.21255e-23	AT3G45880
chr3	16870800	16872599	1177	948	1.56914e-24	1.36437	6.21255e-23	AT3G45890
chr5	6962200	6964199	951	766	3.36918e-20	1.36432	7.21288e-19	AT5G20580
chr5	6962200	6964199	951	766	3.36918e-20	1.36432	7.21288e-19	AT5G20590
chr1	1226600	1227199	360	290	8.51042e-09	1.36417	3.12494e-08	AT1G04510
chr1	12503400	12504199	468	377	6.7887e-11	1.36417	3.53054e-10	AT1G34300
chr2	6677200	6677599	211	170	7.26074e-06	1.36395	1.63495e-05	AT2G15340
chr3	1081000	1081599	211	170	7.26074e-06	1.36395	1.63495e-05	AT3G04120
chr4	9919400	9920399	736	593	4.78947e-16	1.36392	5.56419e-15	AT4G17840
chr2	12100000	12100799	453	365	1.36395e-10	1.36386	6.73085e-10	AT2G28330
chr4	15144800	15146599	1045	842	5.86798e-22	1.36386	1.66494e-20	AT4G31150
chr4	15144800	15146599	1045	842	5.86798e-22	1.36386	1.66494e-20	AT4G31160
chr1	9815000	9815599	278	224	3.48794e-07	1.36383	9.81988e-07	AT1G28120
chr3	1102000	1102799	417	336	6.8128e-10	1.36383	3.02658e-09	AT3G04190
chr4	10603800	10604599	520	419	6.95051e-12	1.36381	4.22953e-11	AT4G19440
chr4	8507200	8508199	381	307	3.41425e-09	1.3638	1.33584e-08	AT4G14819
chr4	8507200	8508199	381	307	3.41425e-09	1.3638	1.33584e-08	AT4G14820
chr4	13796600	13797599	654	527	1.84331e-14	1.36374	1.69755e-13	AT4G27630
chr1	10174400	10174999	273	220	4.41593e-07	1.36366	1.22127e-06	AT1G29120
chr5	3687200	3687799	340	274	2.17139e-08	1.36362	7.47836e-08	AT5G11520
chr1	9592200	9592799	371	299	5.44873e-09	1.36354	2.07271e-08	AT1G27590
chr3	20206000	20206799	263	212	7.08155e-07	1.36328	1.88865e-06	AT3G54590
chr5	15785800	15786599	361	291	8.69845e-09	1.36326	3.19089e-08	AT5G39450
chr3	1479400	1480199	392	316	2.18718e-09	1.36321	8.88247e-09	AT3G05210
chr1	6115800	6116599	454	366	1.39373e-10	1.36314	6.86615e-10	AT1G17760
chr4	17489400	17490199	454	366	1.39373e-10	1.36314	6.86615e-10	AT4G37130
chr5	17583000	17583999	609	491	1.47615e-13	1.36301	1.1728e-12	AT5G43755
chr5	15643800	15644999	604	487	1.86033e-13	1.36293	1.45602e-12	AT5G39090
chr5	9798000	9799199	635	512	4.74554e-14	1.36291	4.08224e-13	AT5G27680
chr5	4604800	4605399	253	204	1.13637e-06	1.36287	2.93353e-06	AT5G14270
chr3	2331600	2333999	1451	1170	1.40973e-29	1.36284	1.14503e-27	AT3G07320
chr1	7603400	7604399	630	508	5.97961e-14	1.36283	5.05197e-13	AT1G21650
chr1	7603400	7604399	630	508	5.97961e-14	1.36283	5.05197e-13	AT1G21651
chr3	6926200	6927199	692	558	3.90212e-15	1.36281	4.00258e-14	AT3G19910
chr5	6427800	6429199	785	633	6.54932e-17	1.3628	8.68577e-16	AT5G19150
chr5	6427800	6429199	785	633	6.54932e-17	1.3628	8.68577e-16	AT5G19151
chr3	18913600	18914399	439	354	2.80157e-10	1.36278	1.32021e-09	AT3G50880
chr5	6498800	6499599	656	529	1.92348e-14	1.36274	1.76536e-13	AT5G19310
chr1	19214200	19215599	713	575	1.58347e-15	1.36266	1.72028e-14	AT1G51800
chr2	9453200	9454199	558	450	1.46275e-12	1.36266	9.86901e-12	AT2G22240
chr2	12767600	12768399	496	400	2.26626e-11	1.36266	1.2674e-10	AT2G29950
chr4	15787200	15787799	279	225	3.56581e-07	1.36266	1.00302e-06	AT4G32720
chr5	4064600	4064999	186	150	2.39824e-05	1.36266	4.97715e-05	AT5G12870
chr2	13472800	13473399	305	246	1.12292e-07	1.36248	3.41769e-07	AT2G31670
chr4	2537000	2537999	579	467	5.91702e-13	1.36247	4.25455e-12	AT4G04970
chr5	18918800	18919399	274	221	4.51447e-07	1.36246	1.24579e-06	AT5G46620
chr3	16712400	16712999	212	171	7.42593e-06	1.3624	1.67046e-05	AT3G45555
chr5	4341200	4341999	424	342	5.63462e-10	1.3624	2.53592e-09	AT5G13520
chr5	4341200	4341999	424	342	5.63462e-10	1.3624	2.53592e-09	AT5G13510
chr1	18116800	18117599	481	388	4.54921e-11	1.36232	2.42791e-10	AT1G48970
chr2	8659000	8659799	450	363	1.79698e-10	1.36229	8.72555e-10	AT2G20060
chr5	17208800	17209599	450	363	1.79698e-10	1.36229	8.72555e-10	AT5G42920
chr5	19235800	19236399	300	242	1.42067e-07	1.36229	4.25819e-07	AT5G47430
chr1	23072400	23072999	269	217	5.71639e-07	1.36225	1.55023e-06	AT1G62370
chr2	15119400	15120399	807	651	2.71848e-17	1.36225	3.83362e-16	AT2G36010
chr3	21250400	21250999	269	217	5.71639e-07	1.36225	1.55023e-06	AT3G57410
chr4	167600	168599	538	434	3.6961e-12	1.36225	2.34885e-11	AT4G00380
chr4	708000	709399	802	647	3.42254e-17	1.36218	4.7244e-16	AT4G01660
chr4	16698200	16698999	564	455	1.18521e-12	1.36217	8.11802e-12	AT4G35080
chr2	9832000	9832799	445	359	2.26784e-10	1.36217	1.08408e-09	AT2G23093
chr3	3937400	3938599	559	451	1.49414e-12	1.36207	1.00593e-11	AT3G12370
chr3	3937400	3938599	559	451	1.49414e-12	1.36207	1.00593e-11	AT3G12380
chr1	10507600	10508199	264	213	7.23943e-07	1.36204	1.92858e-06	AT1G29990
chr4	17374800	17376199	761	614	2.11703e-16	1.36201	2.58984e-15	AT4G36880
chr5	9143000	9143799	347	280	1.79415e-08	1.36187	6.25193e-08	AT5G26160
chr1	2039400	2041199	1212	978	6.15011e-25	1.36185	2.58646e-23	AT1G06660
chr1	2039400	2041199	1212	978	6.15011e-25	1.36185	2.58646e-23	AT1G06670
chr5	3032200	3034399	1145	924	1.16279e-23	1.36175	4.08271e-22	AT5G09760
chr4	7825800	7826799	622	502	9.90446e-14	1.36161	8.10735e-13	AT4G13460
chr1	6361600	6362199	254	205	1.16168e-06	1.36158	2.99356e-06	AT1G18480
chr2	15489600	15490399	451	364	1.8357e-10	1.36157	8.90101e-10	AT2G36895
chr1	6073800	6074599	648	523	3.18476e-14	1.36156	2.8138e-13	AT1G17665
chr1	9485200	9485999	420	339	7.26704e-10	1.36149	3.21554e-09	AT1G27310
chr3	5524200	5526399	1421	1147	7.76574e-29	1.36143	5.74088e-27	AT3G16300
chr3	5524200	5526399	1421	1147	7.76574e-29	1.36143	5.74088e-27	AT3G16290
chr1	11217000	11217599	332	268	3.62439e-08	1.36134	1.19831e-07	AT1G31335
chr2	12897200	12897599	166	134	6.27227e-05	1.36134	0.000122022	AT2G30230
chr5	18366000	18366799	498	402	2.36466e-11	1.36134	1.3197e-10	AT5G45330
chr2	18875000	18877399	1629	1315	9.70396e-33	1.36132	1.18482e-30	AT2G45860
chr2	18875000	18877399	1629	1315	9.70396e-33	1.36132	1.18482e-30	AT2G45870
chr3	21948800	21950999	1240	1001	2.08024e-25	1.3613	9.307e-24	AT3G59400
chr3	21948800	21950999	1240	1001	2.08024e-25	1.3613	9.307e-24	AT3G59410
chr2	8361200	8362999	716	578	1.68649e-15	1.36129	1.82381e-14	AT2G19270
chr2	8361200	8362999	716	578	1.68649e-15	1.36129	1.82381e-14	AT2G19280
chr3	5376600	5377199	275	222	4.61419e-07	1.36127	1.27146e-06	AT3G15900
chr1	3161200	3162199	467	377	9.33218e-11	1.36126	4.74443e-10	AT1G09760
chr1	3161200	3162199	467	377	9.33218e-11	1.36126	4.74443e-10	AT1G09770
chr3	15430600	15431399	467	377	9.33218e-11	1.36126	4.74443e-10	AT3G43540
chr1	24245400	24245799	218	176	5.98353e-06	1.36116	1.36662e-05	AT1G65280
chr2	16444200	16445399	893	721	7.7541e-19	1.36107	1.35751e-17	AT2G39370
chr1	403800	405399	836	675	9.3463e-18	1.36103	1.39825e-16	AT1G02140
chr1	403800	405399	836	675	9.3463e-18	1.36103	1.39825e-16	AT1G02145
chr1	10422400	10422799	161	130	7.98369e-05	1.36097	0.000152633	AT1G29760
chr2	19309600	19310999	374	302	5.81261e-09	1.36091	2.19788e-08	AT2G47000
chr3	3144000	3144399	187	151	2.45275e-05	1.36091	5.08192e-05	AT3G10160
chr4	10984000	10985199	587	474	5.00083e-13	1.36089	3.64845e-12	AT4G20330
chr4	10984000	10985199	587	474	5.00083e-13	1.36089	3.64845e-12	AT4G20340
chr5	19698400	19699199	400	323	1.84703e-09	1.36089	7.58078e-09	AT5G48580
chr5	19698400	19699199	400	323	1.84703e-09	1.36089	7.58078e-09	AT5G48590
chr4	6575600	6576199	239	193	2.36447e-06	1.36083	5.80234e-06	AT4G10650
chr3	21410600	21411799	712	575	2.1688e-15	1.36075	2.3007e-14	AT3G57800
chr1	19953400	19954199	369	298	7.34358e-09	1.36074	2.72611e-08	AT1G53450
chr1	28271200	28272799	967	781	3.3716e-20	1.36063	7.20989e-19	AT1G75340
chr1	28271200	28272799	967	781	3.3716e-20	1.36063	7.20989e-19	AT1G75350
chr1	23173400	23173999	364	294	9.27859e-09	1.36056	3.38991e-08	AT1G62580
chr4	9697200	9697599	234	189	2.99767e-06	1.36056	7.23332e-06	AT4G17330
chr3	18806800	18808199	931	752	1.65008e-19	1.36049	3.20614e-18	AT3G50650
chr5	23167800	23169599	1181	954	3.3244e-24	1.3604	1.26334e-22	AT5G57180
chr5	6459000	6459999	640	517	5.27131e-14	1.36036	4.50381e-13	AT5G19200
chr3	3012000	3012599	307	248	1.17255e-07	1.36035	3.55902e-07	AT3G09820
chr1	12245600	12246199	250	202	1.50433e-06	1.36005	3.80379e-06	AT1G33780
chr2	16469000	16469599	250	202	1.50433e-06	1.36005	3.80379e-06	AT2G39440
chr2	18973400	18974199	396	320	2.3824e-09	1.35991	9.60624e-09	AT2G46192
chr5	4120800	4121399	396	320	2.3824e-09	1.35991	9.60624e-09	AT5G13000
chr3	20978200	20982199	1903	1538	1.23921e-37	1.35971	2.7919e-35	AT3G56630
chr3	20978200	20982199	1903	1538	1.23921e-37	1.35971	2.7919e-35	AT3G56640
chr1	4429600	4431199	1022	826	3.75796e-21	1.35968	9.38251e-20	AT1G12980
chr2	7688600	7689399	292	236	2.37517e-07	1.35968	6.86262e-07	AT2G17700
chr5	5474200	5475399	704	569	3.58576e-15	1.35964	3.69812e-14	AT5G16690
chr1	23506400	23507999	1064	860	6.23985e-22	1.35959	1.75728e-20	AT1G63380
chr1	23506400	23507999	1064	860	6.23985e-22	1.35959	1.75728e-20	AT1G63390
chr1	23506400	23507999	1064	860	6.23985e-22	1.35959	1.75728e-20	AT1G63400
chr5	1473000	1473999	506	409	1.99651e-11	1.35954	1.12419e-10	AT5G04990
chr1	11479800	11480599	527	426	8.05934e-12	1.35946	4.86983e-11	AT1G31970
chr3	10759600	10760399	595	481	4.22321e-13	1.35937	3.12204e-12	AT3G28700
chr5	1755800	1756599	428	346	6.13276e-10	1.35935	2.7412e-09	AT5G05830
chr1	22215200	22215999	569	460	1.31597e-12	1.35931	8.93926e-12	AT1G60240
chr2	13153400	13153799	188	152	2.50768e-05	1.35919	5.18891e-05	AT2G30910
chr4	309600	311399	517	418	1.2816e-11	1.35919	7.47894e-11	AT4G00740
chr5	1301800	1302399	329	266	4.78227e-08	1.35919	1.54814e-07	AT5G04540
chr5	6518800	6519599	444	359	3.1142e-10	1.35911	1.45882e-09	AT5G19350
chr5	358000	360799	1938	1567	3.48231e-38	1.35909	8.55879e-36	AT5G01910
chr5	358000	360799	1938	1567	3.48231e-38	1.35909	8.55879e-36	AT5G01920
chr3	21656400	21657199	350	283	1.91257e-08	1.35908	6.63526e-08	AT3G58570
chr3	22135000	22135599	256	207	1.21313e-06	1.35905	3.11556e-06	AT3G59920
chr3	2451600	2452399	627	507	1.09895e-13	1.35901	8.93371e-13	AT3G07670
chr2	16209600	16211399	998	807	1.20896e-20	1.35901	2.78002e-19	AT2G38780
chr2	16209600	16211399	998	807	1.20896e-20	1.35901	2.78002e-19	AT2G38770
chr2	15868800	15870799	925	748	2.8362e-19	1.35895	5.32491e-18	AT2G37910
chr2	15868800	15870799	925	748	2.8362e-19	1.35895	5.32491e-18	AT2G37920
chr2	15868800	15870799	925	748	2.8362e-19	1.35895	5.32491e-18	AT2G37925
chr2	8205600	8206599	601	486	3.42083e-13	1.35895	2.5619e-12	AT2G18940
chr5	8284800	8285399	277	224	4.81714e-07	1.35893	1.32276e-06	AT5G24320
chr1	17558200	17558999	392	317	3.07261e-09	1.35891	1.21422e-08	AT1G47710
chr1	27335600	27336599	502	406	2.57083e-11	1.35876	1.42719e-10	AT1G72590
chr2	8797400	8798199	450	364	2.51945e-10	1.35855	1.1968e-09	AT2G20390
chr2	15029800	15030399	225	182	4.92686e-06	1.35855	1.14182e-05	AT2G35747
chr2	15029800	15030399	225	182	4.92686e-06	1.35855	1.14182e-05	AT2G35750
chr1	17178000	17178399	157	127	0.000103969	1.3585	0.000195064	AT1G45403
chr2	17930000	17930999	471	381	1.01466e-10	1.3585	5.12888e-10	AT2G43130
chr4	17619200	17619799	314	254	9.67201e-08	1.3585	2.98212e-07	AT4G37480
chr1	2247800	2250199	1387	1122	7.62644e-28	1.35846	4.89255e-26	AT1G07310
chr1	2247800	2250199	1387	1122	7.62644e-28	1.35846	4.89255e-26	AT1G07320
chr1	22958800	22959799	513	415	1.64996e-11	1.35842	9.42512e-11	AT1G62110
chr1	17504800	17505799	691	559	7.46459e-15	1.35841	7.30819e-14	AT1G47610
chr3	1388200	1389999	733	593	1.22845e-15	1.35836	1.34929e-14	AT3G05000
chr3	1388200	1389999	733	593	1.22845e-15	1.35836	1.34929e-14	AT3G05010
chr1	17266000	17266599	377	305	6.19197e-09	1.35833	2.33015e-08	AT1G46768
chr4	11766400	11768599	1508	1220	4.45752e-30	1.35833	3.79993e-28	AT4G22240
chr4	11766400	11768599	1508	1220	4.45752e-30	1.35833	3.79993e-28	AT4G22250
chr4	9594200	9595799	618	500	1.78099e-13	1.35826	1.39508e-12	AT4G17060
chr4	9594200	9595799	618	500	1.78099e-13	1.35826	1.39508e-12	AT4G17070
chr3	9215800	9216599	419	339	9.97884e-10	1.35825	4.29008e-09	AT3G25410
chr1	11784000	11786399	1032	835	3.30633e-21	1.35818	8.36527e-20	AT1G32580
chr1	11784000	11786399	1032	835	3.30633e-21	1.35818	8.36527e-20	AT1G32582
chr1	11784000	11786399	1032	835	3.30633e-21	1.35818	8.36527e-20	AT1G32583
chr3	9813400	9814599	613	496	2.24423e-13	1.35814	1.73143e-12	AT3G26710
chr5	16824200	16824799	262	212	9.78291e-07	1.35809	2.55121e-06	AT5G42080
chr1	28792000	28792799	414	335	1.25983e-09	1.35806	5.31718e-09	AT1G76710
chr5	20822600	20824199	697	564	6.04844e-15	1.35806	5.9993e-14	AT5G51220
chr5	20822600	20824199	697	564	6.04844e-15	1.35806	5.9993e-14	AT5G51230
chr2	8859000	8859399	152	123	0.000132448	1.35801	0.000244591	AT2G20580
chr1	28906600	28907199	346	280	2.46853e-08	1.35795	8.42657e-08	AT1G76950
chr3	10283200	10283799	367	297	9.88295e-09	1.35792	3.59683e-08	AT3G27740
chr3	1021000	1021999	582	471	8.80943e-13	1.3579	6.15652e-12	AT3G03950
chr2	16091000	16091799	493	399	4.17499e-11	1.35781	2.23892e-10	AT2G38420
chr3	1989600	1990199	341	276	3.12029e-08	1.35772	1.04405e-07	AT3G06480
chr5	14594800	14595799	677	548	1.52236e-14	1.3576	1.42135e-13	AT5G36950
chr3	19921600	19922599	740	599	1.01593e-15	1.35759	1.13297e-14	AT3G53760
chr2	8032800	8035399	1302	1054	3.73772e-26	1.35748	1.85174e-24	AT2G18510
chr2	8032800	8035399	1302	1054	3.73772e-26	1.35748	1.85174e-24	AT2G18520
chr3	23443400	23444999	1176	952	8.09793e-24	1.35748	2.90803e-22	AT3G63480
chr3	23443400	23444999	1176	952	8.09793e-24	1.35748	2.90803e-22	AT3G63490
chr4	2497800	2498599	315	255	9.87705e-08	1.35748	3.0399e-07	AT4G04920
chr4	13197200	13197799	252	204	1.57016e-06	1.35748	3.95466e-06	AT4G26000
chr5	17393600	17395199	1318	1067	1.91844e-26	1.35742	9.9198e-25	AT5G43340
chr2	160000	160999	646	523	5.96185e-14	1.35736	5.03921e-13	AT2G01330
chr3	20369200	20371199	1303	1055	3.81304e-26	1.35724	1.88412e-24	AT3G54970
chr3	20369200	20371199	1303	1055	3.81304e-26	1.35724	1.88412e-24	AT3G54980
chr4	16380400	16384199	2449	1983	2.7481e-47	1.35716	2.36399e-44	AT4G34215
[truncated: 1,883 more rows]

## Sheet: SICER Col-0 H2A.Z air vs ET
Supplementary File 8: Genes with a robust eviction of H2A.Z in response to ET
SICER Ler air H2A.Z merge vs Ler 4h ET H2A.Z merge
Genes that show ET-induced H2A.Z eviction in Col-0
chromosome	domain start	domain end	ChIP (reads)	CONTROL (reads)	p-value	fold change	FDR threshold	gene name
chr3	22129800	22130199	87	29	1.60089e-26	3.98605	9.46338e-23	AT3G59900
chr2	2234200	2234599	97	58	1.09219e-12	2.22211	1.0701e-10	AT2G05840
chr3	8254800	8255399	108	68	1.49108e-12	2.11026	1.39173e-10	AT3G23150
chr2	15672400	15672799	75	49	1.15341e-08	2.0337	2.40643e-07	AT2G37340
chr5	16496400	16496999	96	64	4.12281e-10	1.99302	1.48908e-08	AT5G41220
chr1	6396000	6396599	112	75	2.32053e-11	1.98417	1.34485e-09	AT1G18580
chr3	9396400	9397399	183	124	8.01494e-17	1.96088	3.64454e-14	AT3G25730
chr1	3323000	3323599	140	95	2.67673e-13	1.95806	3.27374e-11	AT1G10140
chr1	12023200	12023799	134	92	1.79563e-12	1.93526	1.63301e-10	AT1G33140
chr1	8982200	8982999	145	101	6.93982e-13	1.90752	7.32564e-11	AT1G25560
chr4	14564000	14564199	50	35	1.32202e-05	1.89812	7.96088e-05	AT4G29735
chr4	8878200	8879399	293	206	2.16209e-23	1.88983	5.4775e-20	AT4G15550
chr1	18385400	18385999	105	75	2.63575e-09	1.86016	7.12536e-08	AT1G49670
chr2	17195200	17195799	157	113	1.02709e-12	1.84605	1.01757e-10	AT2G41230
chr2	17195200	17195799	157	113	1.02709e-12	1.84605	1.01757e-10	AT2G41231
chr5	1287000	1287399	92	67	5.15304e-08	1.82446	8.27005e-07	AT5G04510
chr4	6642400	6642999	107	78	5.37439e-09	1.82268	1.27761e-07	AT4G10790
chr5	84600	85999	291	213	7.22192e-21	1.81524	1.1643e-17	AT5G01210
chr5	84600	85999	291	213	7.22192e-21	1.81524	1.1643e-17	AT5G01215
chr1	28220800	28221599	127	93	3.30308e-10	1.81444	1.24897e-08	AT1G75200
chr3	22470600	22471399	188	138	4.33468e-14	1.81009	7.5364e-12	AT3G60810
chr5	8458200	8458599	94	69	5.37661e-08	1.81009	8.55914e-07	AT5G24690
chr4	9765800	9766199	77	57	9.53692e-07	1.79489	9.02978e-06	AT4G17505
chr4	17077200	17077999	237	176	1.06572e-16	1.78919	4.49988e-14	AT4G36080
chr1	1345000	1345399	75	56	1.73572e-06	1.77949	1.49496e-05	AT1G04790
chr3	10334800	10335399	95	71	1.0241e-07	1.77782	1.46581e-06	AT3G27870
chr3	3288000	3288599	104	78	3.35921e-08	1.77158	5.7781e-07	AT3G10530
chr3	8667200	8667599	76	57	1.75894e-06	1.77158	1.50983e-05	AT3G23980
chr4	4070800	4072199	290	220	8.64473e-19	1.75145	7.66528e-16	AT4G06744
chr3	7393200	7393599	79	60	1.81326e-06	1.74943	1.54896e-05	AT3G21090
chr5	20192800	20193399	101	77	1.08304e-07	1.74282	1.53407e-06	AT5G49700
chr5	18543600	18544599	177	135	4.67218e-12	1.74205	3.60245e-10	AT5G45720
chr5	981800	982599	235	180	3.52786e-15	1.73467	9.33778e-13	AT5G03740
chr2	11684200	11684999	190	146	1.56433e-12	1.72911	1.45245e-10	AT2G27310
chr4	433200	433799	117	90	2.03521e-08	1.72729	3.87674e-07	AT4G01000
chr4	11819000	11819399	74	57	5.7648e-06	1.72496	4.05043e-05	AT4G22410
chr1	26430600	26431199	118	91	2.0399e-08	1.72291	3.87734e-07	AT1G70190
chr4	18238800	18239599	155	120	2.33866e-10	1.71622	9.51232e-09	AT4G39160
chr5	20567200	20567999	187	145	4.76962e-12	1.71354	3.61472e-10	AT5G50510
chr4	11475800	11476199	95	74	5.98567e-07	1.70574	6.17509e-06	AT4G21580
chr5	4841000	4841799	205	160	8.9678e-13	1.70238	9.13994e-11	AT5G14950
chr3	4221000	4221599	153	120	7.05038e-10	1.69407	2.35908e-08	AT3G13120
chr3	8134200	8134799	144	113	2.15415e-09	1.69319	6.06376e-08	AT3G22942
chr5	18041000	18041599	117	92	6.21686e-08	1.68974	9.67952e-07	AT5G44710
chr2	7971200	7971799	122	96	3.53745e-08	1.68853	6.03784e-07	AT2G18350
chr1	8974200	8974599	80	63	5.75561e-06	1.68722	4.04558e-05	AT1G25540
chr5	2528800	2529199	85	67	3.25151e-06	1.68564	2.52572e-05	AT5G07920
chr4	13266200	13266999	243	193	5.19413e-14	1.6729	8.77265e-12	AT4G26190
chr1	28792000	28792599	186	148	4.09713e-11	1.66983	2.12452e-09	AT1G76710
chr3	4062400	4063199	152	121	2.05716e-09	1.66909	5.87465e-08	AT3G12780
chr2	16447200	16447599	74	59	1.77491e-05	1.66648	0.000101015	AT2G39380
chr1	19641000	19641599	94	75	1.7945e-06	1.66528	1.53441e-05	AT1G52720
chr5	9375200	9375599	75	60	1.76163e-05	1.66085	0.000100517	AT5G26610
chr5	4898600	4899399	176	141	2.10481e-10	1.6585	8.7212e-09	AT5G15120
chr5	4756000	4756999	257	206	2.75176e-14	1.65763	5.67439e-12	AT5G14730
chr5	3128000	3128599	197	158	2.22027e-11	1.65665	1.29948e-09	AT5G10010
chr4	16336400	16336999	122	98	1.02002e-07	1.65407	1.46233e-06	AT4G34110
chr3	2694800	2695399	134	108	3.22441e-08	1.64855	5.58961e-07	AT3G08850
chr1	29772800	29773399	124	100	9.98995e-08	1.64757	1.44034e-06	AT1G79150
chr1	7734800	7735599	145	117	1.0319e-08	1.64666	2.19422e-07	AT1G21980
chr1	4360800	4361399	130	105	5.61082e-08	1.64504	8.88414e-07	AT1G12790
chr5	726800	727599	234	189	7.21386e-13	1.64504	7.52533e-11	AT5G03100
chr2	16739800	16740399	203	164	2.0801e-11	1.64465	1.24624e-09	AT2G40090
chr1	22904400	22905399	198	160	3.63884e-11	1.64425	1.92057e-09	AT1G61970
chr1	1952400	1952799	79	64	1.69399e-05	1.64009	9.72524e-05	AT1G06400
chr2	11051400	11051999	153	124	5.67083e-09	1.63942	1.33201e-07	AT2G25910
chr1	2642200	2642799	175	142	5.84313e-10	1.63746	2.00429e-08	AT1G08390
chr2	7200800	7201399	122	99	1.69936e-07	1.63737	2.19814e-06	AT2G16600
chr2	19130000	19130599	129	105	9.40174e-08	1.63238	1.37227e-06	AT2G46580
chr4	8434200	8434999	253	206	2.10912e-13	1.63183	2.77061e-11	AT4G14720
chr5	25345600	25345999	92	75	5.17476e-06	1.62985	3.70037e-05	AT5G63190
chr1	22348600	22349399	147	120	1.65891e-08	1.62764	3.24714e-07	AT1G60680
chr5	23967400	23968599	175	143	9.56489e-10	1.62601	3.01286e-08	AT5G59430
chr5	2010400	2010999	208	170	3.1873e-11	1.62568	1.74996e-09	AT5G06570
chr2	16686000	16686799	165	135	2.93864e-09	1.62395	7.81317e-08	AT2G39970
chr3	21823600	21824199	121	99	2.83783e-07	1.62395	3.31966e-06	AT3G59040
chr5	22720000	22720599	215	176	1.77046e-11	1.62311	1.07894e-09	AT5G56110
chr1	23306400	23307199	188	154	2.98389e-10	1.62203	1.16044e-08	AT1G62930
chr5	21487600	21487999	83	68	1.60831e-05	1.62177	9.33607e-05	AT5G53000
chr3	17750800	17751399	100	82	2.80054e-06	1.62035	2.21916e-05	AT3G48070
chr1	22976400	22977599	252	207	5.61702e-13	1.61753	6.1871e-11	AT1G62180
chr1	10255200	10255999	185	152	5.06414e-10	1.61715	1.76093e-08	AT1G29320
chr3	22735800	22736399	124	102	2.71179e-07	1.61526	3.19966e-06	AT3G61440
chr3	1021200	1021999	220	181	1.63792e-11	1.61497	1.01208e-09	AT3G03950
chr4	9258000	9258799	192	158	2.80333e-10	1.6146	1.10231e-08	AT4G16390
chr4	13675800	13676399	113	93	8.56434e-07	1.61442	8.26333e-06	AT4G27310
chr5	8897800	8898399	97	80	4.80606e-06	1.61103	3.49592e-05	AT5G25560
chr3	3710800	3711599	160	132	8.35542e-09	1.61052	1.84757e-07	AT3G11730
chr2	8239400	8239999	103	85	2.67235e-06	1.61005	2.13187e-05	AT2G18990
chr3	4010800	4011399	109	90	1.48765e-06	1.60918	1.31253e-05	AT3G12620
chr2	14584000	14584799	167	138	4.60929e-09	1.6079	1.12746e-07	AT2G34640
chr3	3094200	3094799	151	125	2.5275e-08	1.60505	4.67391e-07	AT3G10030
chr3	13493000	13493799	186	154	8.01963e-10	1.60477	2.60476e-08	AT3G32940
chr1	2059600	2060399	271	225	2.53917e-13	1.60032	3.17111e-11	AT1G06710
chr5	8046800	8047799	154	128	2.39607e-08	1.59857	4.45876e-07	AT5G23870
chr3	18160400	18161399	166	138	7.52335e-09	1.59827	1.68458e-07	AT3G48990
chr4	13282000	13282399	89	74	1.45892e-05	1.59801	8.63277e-05	AT4G26210
chr3	9958000	9958799	202	168	2.35708e-10	1.59758	9.56534e-09	AT3G27010
chr1	13450200	13450799	119	99	7.72908e-07	1.5971	7.60219e-06	AT1G36050
chr1	8097000	8097599	179	149	2.32397e-09	1.5962	6.42954e-08	AT1G22880
chr2	18034400	18035199	209	174	1.30094e-10	1.59595	5.75334e-09	AT2G43420
chr1	11332600	11333599	257	214	1.31493e-12	1.59566	1.247e-10	AT1G31660
chr3	10589600	10590399	150	125	4.1245e-08	1.59442	6.85509e-07	AT3G28340
chr2	1870000	1870399	97	81	7.79065e-06	1.59114	5.16291e-05	AT2G05170
chr1	9374000	9374399	85	71	2.54179e-05	1.59068	0.000136553	AT1G27000
chr5	3185600	3186399	244	204	6.67611e-12	1.58921	4.81277e-10	AT5G10160
chr4	8137200	8138199	220	184	6.64761e-11	1.58864	3.25659e-09	AT4G14130
chr5	23681000	23681799	257	215	2.07806e-12	1.58824	1.84261e-10	AT5G58590
chr1	22564400	22564999	105	88	4.15863e-06	1.58536	3.08832e-05	AT1G61210
chr4	11258000	11258599	167	140	1.17338e-08	1.58493	2.43661e-07	AT4G21090
chr1	18416400	18417199	137	115	2.14146e-07	1.58287	2.64831e-06	AT1G49760
chr2	8109000	8110199	287	241	1.86161e-13	1.58229	2.48224e-11	AT2G18700
chr5	16799400	16799799	101	85	7.19569e-06	1.57879	4.85018e-05	AT5G42000
chr4	15241600	15242999	209	176	3.24182e-10	1.57781	1.23635e-08	AT4G31408
chr5	20312400	20312799	76	64	7.87613e-05	1.57781	0.000345902	AT5G49930
chr5	25619600	25620199	153	129	6.15575e-08	1.57588	9.60969e-07	AT5G64010
chr5	1944800	1945399	134	113	3.60476e-07	1.57561	4.09001e-06	AT5G06360
chr1	20227200	20227999	262	221	2.93963e-12	1.57518	2.47068e-10	AT1G54180
chr3	9084800	9085199	90	76	2.29784e-05	1.57344	0.0001255	AT3G24870
chr3	10784800	10785599	148	125	1.07747e-07	1.57316	1.52862e-06	AT3G28730
chr1	26097600	26099199	464	392	4.35317e-20	1.57273	5.14661e-17	AT1G69430
chr4	5740800	5741199	84	71	4.16067e-05	1.57196	0.000205588	AT4G08950
chr5	18204200	18204599	97	82	1.24452e-05	1.57173	7.56613e-05	AT5G45090
chr2	8920600	8921399	169	143	1.76978e-08	1.57026	3.44515e-07	AT2G20680
chr5	25490000	25490799	163	138	3.15945e-08	1.56939	5.50389e-07	AT5G63680
chr1	11577200	11577799	150	127	1.03147e-07	1.56931	1.4728e-06	AT1G32170
chr4	11264800	11265999	261	221	4.67725e-12	1.56917	3.59075e-10	AT4G21100
chr4	11264800	11265999	261	221	4.67725e-12	1.56917	3.59075e-10	AT4G21105
chr1	13279800	13280199	105	89	6.60408e-06	1.56755	4.53063e-05	AT1G35780
chr3	3096800	3098199	395	335	3.75312e-17	1.56666	1.84883e-14	AT3G10040
chr2	19481400	19481999	112	95	3.58683e-06	1.56645	2.73469e-05	AT2G47470
chr4	450400	451199	178	151	9.28127e-09	1.56626	2.00236e-07	AT4G01030
chr1	10655000	10655599	132	112	5.92104e-07	1.56595	6.12266e-06	AT1G30270
chr1	21816800	21817999	165	140	3.02179e-08	1.56595	5.30842e-07	AT1G59124
chr2	11106400	11107199	165	140	3.02179e-08	1.56595	5.30842e-07	AT2G26070
chr3	17449400	17450199	139	118	3.23082e-07	1.56514	3.71084e-06	AT3G47350
chr5	7040000	7040799	298	253	2.28435e-13	1.56501	2.89361e-11	AT5G20790
chr5	21955400	21956599	351	298	2.1183e-15	1.56499	6.36709e-13	AT5G54100
chr2	12713000	12713599	154	131	9.42643e-08	1.56196	1.37361e-06	AT2G29760
chr4	14110800	14111399	114	97	3.42797e-06	1.56155	2.63624e-05	AT4G28550
chr5	5374200	5375799	228	194	1.36826e-10	1.56155	6.00613e-09	AT5G16453
chr5	5374200	5375799	228	194	1.36826e-10	1.56155	6.00613e-09	AT5G16450
chr4	10322600	10323399	141	120	3.08679e-07	1.5612	3.57786e-06	AT4G18810
chr2	905600	906399	168	143	2.82208e-08	1.56097	5.05522e-07	AT2G03070
chr1	7007000	7007599	128	109	1.01458e-06	1.56029	9.47722e-06	AT1G20220
chr4	1428200	1428799	128	109	1.01458e-06	1.56029	9.47722e-06	AT4G03260
chr5	3178800	3179599	209	178	7.86466e-10	1.56008	2.57328e-08	AT5G10140
chr2	7743000	7744199	169	144	2.75738e-08	1.55936	4.96441e-07	AT2G17820
chr5	25379000	25379399	88	75	3.80465e-05	1.55899	0.000190921	AT5G63340
chr5	25379000	25379399	88	75	3.80465e-05	1.55899	0.000190921	AT5G63320
chr5	565200	565799	136	116	5.4015e-07	1.55777	5.71371e-06	AT5G02530
chr5	17036200	17036999	136	116	5.4015e-07	1.55777	5.71371e-06	AT5G42591
chr5	20190000	20191399	327	279	3.19353e-14	1.55727	6.15587e-12	AT5G49690
chr3	9709400	9709999	246	210	3.7728e-11	1.55646	1.97365e-09	AT3G26500
chr3	3063800	3064199	130	111	9.68195e-07	1.55612	9.11841e-06	AT3G09970
chr5	19072000	19072399	96	82	2.00719e-05	1.55553	0.000111901	AT5G47010
chr3	2585200	2586199	158	135	8.58465e-08	1.55505	1.26656e-06	AT3G08510
chr3	2585200	2586199	158	135	8.58465e-08	1.55505	1.26656e-06	AT3G08520
chr1	24954600	24955399	220	188	3.93291e-10	1.55484	1.43216e-08	AT1G66880
chr3	4707600	4708599	172	147	2.56914e-08	1.55465	4.71403e-07	AT3G14180
chr4	6150800	6151399	172	147	2.56914e-08	1.55465	4.71403e-07	AT4G09760
chr3	3510000	3511599	234	200	1.1886e-10	1.55456	5.36351e-09	AT3G11200
chr3	3510000	3511599	234	200	1.1886e-10	1.55456	5.36351e-09	AT3G11210
chr5	24894200	24894999	179	153	1.40693e-08	1.55447	2.83851e-07	AT5G61980
chr2	14139800	14140399	124	106	1.73711e-06	1.55431	1.49471e-05	AT2G33360
chr3	19220200	19220599	76	65	0.000125329	1.55354	0.000512587	AT3G51830
chr3	1876400	1876799	97	83	1.95992e-05	1.5528	0.0001098	AT3G06190
chr5	232800	233599	208	178	1.24262e-09	1.55262	3.83246e-08	AT5G01620
chr5	9675600	9676799	313	268	1.60736e-13	1.55178	2.26229e-11	AT5G27390
chr5	9675600	9676799	313	268	1.60736e-13	1.55178	2.26229e-11	AT5G27400
chr5	9675600	9676799	313	268	1.60736e-13	1.55178	2.26229e-11	AT5G27410
chr2	7398200	7399799	320	274	8.86914e-14	1.55175	1.34432e-11	AT2G17020
chr2	7398200	7399799	320	274	8.86914e-14	1.55175	1.34432e-11	AT2G17030
chr4	9328200	9328799	105	90	1.0351e-05	1.55013	6.5094e-05	AT4G16560
chr5	5180600	5181399	231	198	1.96289e-10	1.55013	8.19058e-09	AT5G15860
chr5	17574400	17574999	112	96	5.61011e-06	1.55013	3.959e-05	AT5G43745
chr5	24888600	24889199	126	108	1.65532e-06	1.55013	1.43407e-05	AT5G61970
chr5	7935400	7936799	276	237	5.06614e-12	1.54733	3.79084e-10	AT5G23535
chr5	26725400	26726399	156	134	1.39151e-07	1.54683	1.87373e-06	AT5G66920
chr5	26725400	26726399	156	134	1.39151e-07	1.54683	1.87373e-06	AT5G66930
chr4	97000	98399	284	244	2.72306e-12	1.5465	2.31057e-10	AT4G00230
chr4	97000	98399	284	244	2.72306e-12	1.5465	2.31057e-10	AT4G00231
chr3	8741200	8741799	128	110	1.57583e-06	1.5461	1.37936e-05	AT3G24180
chr2	8517600	8518199	121	104	2.89899e-06	1.54587	2.28086e-05	AT2G19760
chr1	16646200	16647199	150	129	2.48621e-07	1.54498	2.98311e-06	AT1G43890
chr2	16688400	16689999	436	375	9.25635e-18	1.54482	5.47174e-15	AT2G39980
chr5	7748400	7749399	186	160	1.18559e-08	1.54459	2.45622e-07	AT5G23080
chr5	7748400	7749399	186	160	1.18559e-08	1.54459	2.45622e-07	AT5G23090
chr5	17368000	17368599	122	105	2.82745e-06	1.5438	2.23449e-05	AT5G43280
chr1	28416400	28416999	151	130	2.42466e-07	1.54332	2.92112e-06	AT1G75670
chr4	11882400	11882999	101	87	1.77596e-05	1.54249	0.000101042	AT4G22570
chr4	8949600	8950199	130	112	1.49877e-06	1.54222	1.32038e-05	AT4G15720
chr5	9433600	9434199	159	137	1.29082e-07	1.54205	1.76631e-06	AT5G26820
chr2	15339000	15339799	210	181	1.81227e-09	1.54157	5.3122e-08	AT2G36580
chr4	1009400	1009999	175	151	3.66663e-08	1.53986	6.21347e-07	AT4G02300
chr5	4628200	4628999	175	151	3.66663e-08	1.53986	6.21347e-07	AT5G14350
chr3	6183800	6184399	197	170	5.87214e-09	1.53971	1.37565e-07	AT3G18060
chr3	19133000	19133399	88	76	5.94917e-05	1.53848	0.000274532	AT3G51580
chr1	389000	390199	235	203	2.71093e-10	1.53813	1.07552e-08	AT1G02090
chr1	389000	390199	235	203	2.71093e-10	1.53813	1.07552e-08	AT1G02100
chr5	902000	902799	191	165	1.04429e-08	1.53805	2.21259e-07	AT5G03560
chr4	493600	494199	147	127	4.11787e-07	1.53792	4.57272e-06	AT4G01150
chr3	1554800	1555399	184	159	1.90651e-08	1.5376	3.65909e-07	AT3G05410
chr2	1531000	1531799	177	153	3.48293e-08	1.5371	5.95624e-07	AT2G04400
chr5	22273200	22273799	118	102	4.8246e-06	1.5371	3.50797e-05	AT5G54830
chr4	13151600	13152399	155	134	2.18927e-07	1.53691	2.69054e-06	AT4G25870
chr2	12959400	12959999	126	109	2.55255e-06	1.53591	2.05852e-05	AT2G30410
chr1	29001600	29002199	119	103	4.70078e-06	1.53508	3.42778e-05	AT1G77180
chr1	9060400	9061199	172	149	6.04388e-08	1.53378	9.47676e-07	AT1G26190
chr2	14630200	14630799	128	111	2.4221e-06	1.53218	1.97216e-05	AT2G34690
chr4	13315400	13316199	235	204	4.10826e-10	1.53059	1.48686e-08	AT4G26310
chr3	6854600	6855599	273	237	1.91269e-11	1.53051	1.16163e-09	AT3G19720
chr1	27611400	27611999	153	133	3.51658e-07	1.52849	4.0002e-06	AT1G73440
chr3	9942800	9943399	177	154	5.29163e-08	1.52712	8.43901e-07	AT3G26950
chr1	8867200	8867999	170	148	9.67542e-08	1.52619	1.4024e-06	AT1G25290
chr1	2108600	2109599	279	243	1.6289e-11	1.52553	1.01003e-09	AT1G06870
chr4	7391400	7391999	109	95	1.4387e-05	1.52449	8.5302e-05	AT4G12460
chr1	4602800	4603399	117	102	7.58277e-06	1.52408	5.05537e-05	AT1G13410
chr1	11937200	11937599	78	68	0.000185601	1.52408	0.000707991	AT1G32940
chr1	13220800	13221399	94	82	5.07054e-05	1.52312	0.000242179	AT1G35710
chr4	16648600	16649199	196	171	1.38548e-08	1.52294	2.8016e-07	AT4G34960
chr1	27594200	27595199	149	130	5.94377e-07	1.52288	6.14259e-06	AT1G73390
chr5	6414600	6415599	173	151	8.91594e-08	1.52227	1.30999e-06	AT5G19120
chr2	3056800	3057199	71	62	0.000347208	1.52156	0.00119052	AT2G07360
chr2	12558000	12558399	95	83	4.93243e-05	1.52078	0.000236794	AT2G29210
chr1	12429800	12430599	198	173	1.31141e-08	1.52069	2.67932e-07	AT1G34130
chr3	1862200	1863799	309	270	2.13523e-12	1.5206	1.88389e-10	AT3G06150
chr1	18631400	18631999	143	125	1.0609e-06	1.52001	9.82971e-06	AT1G50300
chr1	2120200	2121599	374	327	1.4422e-14	1.51966	3.15752e-12	AT1G06900
chr1	2120200	2121599	374	327	1.4422e-14	1.51966	3.15752e-12	AT1G06910
chr3	1152600	1153599	199	174	1.27566e-08	1.51959	2.6229e-07	AT3G04340
chr3	18409000	18409799	199	174	1.27566e-08	1.51959	2.6229e-07	AT3G49650
chr3	488000	488599	112	98	1.32422e-05	1.51849	7.96867e-05	AT3G02380
chr4	17285000	17285599	152	133	5.4706e-07	1.51849	5.76102e-06	AT4G36650
chr4	18101400	18102599	208	182	6.61944e-09	1.51849	1.5108e-07	AT4G38780
chr5	16503800	16504399	96	84	4.79686e-05	1.51849	0.000231728	AT5G41260
chr5	6700600	6701199	121	106	6.78632e-06	1.5167	4.63236e-05	AT5G19820
chr4	17658800	17660399	307	269	3.36943e-12	1.51638	2.76636e-10	AT4G37580
chr4	14497600	14498599	202	177	1.17336e-08	1.51635	2.43944e-07	AT4G29540
chr5	9605600	9606199	170	149	1.45897e-07	1.51595	1.93953e-06	AT5G27270
chr1	20451800	20452199	81	71	0.000170714	1.51582	0.000661012	AT1G54830
chr4	7284600	7284999	73	64	0.000328273	1.51553	0.00113681	AT4G12230
chr1	9956400	9956999	138	121	1.84214e-06	1.51536	1.56834e-05	AT1G28370
chr5	117200	117999	187	164	4.01634e-08	1.51502	6.72576e-07	AT5G01290
chr1	29416800	29417399	114	100	1.2517e-05	1.5147	7.60455e-05	AT1G78180
chr4	16498400	16499199	171	150	1.41844e-07	1.5147	1.90277e-06	AT4G34530
chr4	16498400	16499199	171	150	1.41844e-07	1.5147	1.90277e-06	AT4G34540
chr5	19487600	19488399	139	122	1.79073e-06	1.51383	1.53192e-05	AT5G48090
chr4	10533200	10533599	90	79	8.65992e-05	1.51369	0.000374026	AT4G19260
chr2	16534200	16535199	246	216	4.55972e-10	1.51322	1.61401e-08	AT2G39670
chr5	6849600	6850199	156	137	4.88776e-07	1.51295	5.25013e-06	AT5G20280
chr2	7152200	7153199	255	224	2.37161e-10	1.51256	9.60232e-09	AT2G16500
chr1	19330800	19331399	116	102	1.18224e-05	1.51105	7.25084e-05	AT1G51990
chr3	12591600	12592199	116	102	1.18224e-05	1.51105	7.25084e-05	AT3G30841
chr2	1180000	1180399	75	66	0.000309965	1.50987	0.00108292	AT2G03870
chr5	15050600	15051199	125	110	6.05551e-06	1.50987	4.21958e-05	AT5G37820
chr3	20925000	20926599	392	345	8.70389e-15	1.50969	2.00461e-12	AT3G56430
chr3	20925000	20926599	392	345	8.70389e-15	1.50969	2.00461e-12	AT3G56440
chr3	1325400	1326599	267	235	1.13291e-10	1.50961	5.15156e-09	AT3G04820
chr3	1325400	1326599	267	235	1.13291e-10	1.50961	5.15156e-09	AT3G04830
chr1	12104000	12105199	184	162	6.54276e-08	1.50912	1.00895e-06	AT1G33390
chr1	12104000	12105199	184	162	6.54276e-08	1.50912	1.00895e-06	AT1G33400
chr5	568800	569199	92	81	8.17556e-05	1.50912	0.00035658	AT5G02540
chr2	11850600	11851399	243	214	7.39301e-10	1.50874	2.44604e-08	AT2G27800
chr3	10218800	10219799	210	185	9.3468e-09	1.50823	2.00917e-07	AT3G27580
chr3	4907400	4907999	101	89	4.15826e-05	1.50783	0.000205526	AT3G14590
chr5	6677000	6677599	118	104	1.11581e-05	1.50754	6.91156e-05	AT5G19750
chr4	10282800	10283599	287	253	2.89872e-11	1.50724	1.61147e-09	AT4G18690
chr4	17776800	17777399	169	149	2.24779e-07	1.50703	2.74912e-06	AT4G37800
chr4	13500800	13501599	178	157	1.16067e-07	1.50641	1.62457e-06	AT4G26850
chr5	2171600	2172799	356	314	1.72784e-13	1.50641	2.35704e-11	AT5G07000
chr4	15119800	15121599	476	420	2.34406e-17	1.50584	1.25968e-14	AT4G31070
chr4	15119800	15121599	476	420	2.34406e-17	1.50584	1.25968e-14	AT4G31075
chr4	15119800	15121599	476	420	2.34406e-17	1.50584	1.25968e-14	AT4G31080
chr1	3076600	3077799	179	158	1.12737e-07	1.50528	1.58296e-06	AT1G09530
chr2	700400	700999	111	98	2.05924e-05	1.50494	0.000114371	AT2G02570
chr3	3941200	3941999	154	136	7.75037e-07	1.50454	7.61047e-06	AT3G12380
chr3	20531400	20531999	120	106	1.05239e-05	1.50417	6.59473e-05	AT3G55380
chr4	13821000	13821799	163	144	3.99286e-07	1.504	4.46465e-06	AT4G27680
chr4	5251800	5252199	86	76	0.000147669	1.50351	0.000584937	AT4G08310
chr3	17494200	17494999	164	145	3.87727e-07	1.50279	4.36015e-06	AT3G47470
chr2	6392200	6392799	121	107	1.02179e-05	1.50253	6.44397e-05	AT2G14878
chr1	19278000	19278799	173	153	1.99974e-07	1.50237	2.50095e-06	AT1G51890
chr1	19893000	19893599	130	115	5.23219e-06	1.50199	3.73391e-05	AT1G53320
chr1	26335000	26335599	165	146	3.76461e-07	1.50159	4.25504e-06	AT1G69920
chr4	7121000	7121599	113	100	1.94104e-05	1.50141	0.000108828	AT4G11830
chr5	5700200	5700999	200	177	2.75987e-08	1.50134	4.96384e-07	AT5G17310
chr1	10690200	10690799	122	108	9.91926e-06	1.50092	6.28692e-05	AT1G30330
chr1	27409000	27410199	183	162	1.00243e-07	1.50092	1.44412e-06	AT1G72840
chr1	2696600	2697199	131	116	5.07918e-06	1.5005	3.65264e-05	AT1G08520
chr1	2051200	2052199	245	217	1.0331e-09	1.50013	3.23693e-08	AT1G06690
chr1	26540000	26540599	140	124	2.60542e-06	1.50013	2.08787e-05	AT1G70420
chr1	10034600	10036199	447	396	3.75045e-16	1.4998	1.41512e-13	AT1G28530
chr1	10034600	10036199	447	396	3.75045e-16	1.4998	1.41512e-13	AT1G28540
chr2	8644400	8645399	351	311	4.34218e-13	1.49957	5.00028e-11	AT2G20020
chr1	9605600	9605999	79	70	0.000275395	1.49951	0.000980695	AT1G27600
chr5	20841200	20841799	158	140	6.88695e-07	1.49951	6.88851e-06	AT5G51280
chr3	20892600	20893399	132	117	4.92994e-06	1.49903	3.56266e-05	AT3G56340
chr1	23762200	23762999	185	164	9.44688e-08	1.49882	1.37546e-06	AT1G64050
chr5	10542600	10543199	106	94	3.58606e-05	1.4983	0.000181597	AT5G28540
chr1	30154800	30155799	293	260	3.58865e-11	1.49732	1.89974e-09	AT1G80170
chr1	28712200	28712999	160	142	6.4875e-07	1.49711	6.55925e-06	AT1G76510
chr3	4004600	4005999	214	190	1.23143e-08	1.49652	2.54229e-07	AT3G12600
chr2	7256000	7256599	116	103	1.77411e-05	1.49638	0.000101002	AT2G16720
chr1	30279600	30280399	224	199	6.19123e-09	1.4956	1.43149e-07	AT1G80530
chr1	5209000	5209999	233	207	3.20963e-09	1.49557	8.37053e-08	AT1G15130
chr4	13098400	13099599	341	303	1.25901e-12	1.49532	1.21344e-10	AT4G25710
chr1	18978000	18978399	108	96	3.37559e-05	1.49477	0.000173063	AT1G51190
chr1	29292200	29292799	171	152	3.14698e-07	1.49477	3.631e-06	AT1G77890
chr2	18655400	18656399	225	200	6.00812e-09	1.49477	1.39827e-07	AT2G45240
chr3	19561800	19562599	162	144	6.10854e-07	1.49477	6.28175e-06	AT3G52780
chr4	15621200	15622199	162	144	6.10854e-07	1.49477	6.28175e-06	AT4G32360
chr5	6687000	6687799	198	176	4.331e-08	1.49477	7.12486e-07	AT5G19780
chr2	16611600	16613399	370	329	1.68319e-13	1.49426	2.31393e-11	AT2G39805
chr2	16611600	16613399	370	329	1.68319e-13	1.49426	2.31393e-11	AT2G39810
chr5	18791800	18795599	587	522	2.8791e-20	1.49413	3.64699e-17	AT5G46330
chr5	4967000	4967799	136	121	4.36968e-06	1.4934	3.21676e-05	AT5G15290
chr3	17781800	17782599	218	194	1.09186e-08	1.49306	2.30512e-07	AT3G48150
chr5	7985800	7986399	146	130	2.17448e-06	1.49221	1.80704e-05	AT5G23680
chr4	10633600	10634799	283	252	1.04326e-10	1.49213	4.79304e-09	AT4G19510
chr1	6363200	6363799	137	122	4.2385e-06	1.49205	3.13975e-05	AT1G18485
chr1	19683200	19683399	64	57	0.000998774	1.49185	0.00283941	AT1G52855
chr1	6903200	6903999	156	139	1.08376e-06	1.49118	1.00153e-05	AT1G19880
chr5	7943000	7944399	349	311	9.89922e-13	1.49103	9.91824e-11	AT5G23570
chr4	15602000	15603399	221	197	9.96873e-09	1.49055	2.12738e-07	AT4G32300
chr4	15602000	15603399	221	197	9.96873e-09	1.49055	2.12738e-07	AT4G32320
chr3	20915400	20915999	120	107	1.57027e-05	1.49011	9.15421e-05	AT3G56408
chr5	1640000	1641799	360	321	4.85936e-13	1.49011	5.48891e-11	AT5G05550
chr5	1640000	1641799	360	321	4.85936e-13	1.49011	5.48891e-11	AT5G05560
chr3	7196800	7197399	157	140	1.0511e-06	1.49002	9.75413e-06	AT3G20610
chr3	22814200	22815199	314	280	1.30248e-11	1.49002	8.36891e-10	AT3G61650
chr4	269000	269799	194	173	7.20052e-08	1.48997	1.09327e-06	AT4G00650
chr5	947200	948199	231	206	5.01016e-09	1.48993	1.20393e-07	AT5G03668
chr5	947200	948199	231	206	5.01016e-09	1.48993	1.20393e-07	AT5G03670
chr5	20759600	20759999	74	66	0.000484452	1.48974	0.00157062	AT5G51060
chr5	20522200	20523199	315	281	1.2635e-11	1.48945	8.14797e-10	AT5G50390
chr3	20193800	20194799	251	224	1.26806e-09	1.48884	3.89061e-08	AT3G54550
chr5	16537400	16537799	93	83	0.000119368	1.48877	0.000491725	AT5G41330
chr4	16291800	16293199	373	333	2.24503e-13	1.48828	2.88503e-11	AT4G33990
chr1	1533800	1534399	178	159	2.54185e-07	1.48746	3.03345e-06	AT1G05270
chr1	2443800	2444799	169	151	4.93239e-07	1.48707	5.28207e-06	AT1G07901
chr1	3116000	3116599	113	101	2.89376e-05	1.48655	0.000152505	AT1G09620
chr1	9125000	9125599	113	101	2.89376e-05	1.48655	0.000152505	AT1G26370
chr3	2455200	2455799	113	101	2.89376e-05	1.48655	0.000152505	AT3G07680
chr1	3431800	3432799	283	253	1.52516e-10	1.48623	6.58084e-09	AT1G10450
chr4	12451200	12451999	217	194	1.65175e-08	1.48621	3.24028e-07	AT4G23980
chr2	7731200	7731599	85	76	0.000228953	1.48603	0.00084185	AT2G17787
chr5	26717000	26718799	293	262	7.69158e-11	1.48589	3.70659e-09	AT5G66900
chr5	26717000	26718799	293	262	7.69158e-11	1.48589	3.70659e-09	AT5G66910
chr1	7148800	7149599	123	110	1.43081e-05	1.48571	8.49766e-05	AT1G20630
chr1	27237000	27237599	142	127	3.63291e-06	1.48561	2.76388e-05	AT1G72340
chr1	25235400	25235799	76	68	0.00045499	1.485	0.00149229	AT1G67350
chr4	13532000	13532799	133	119	7.09102e-06	1.485	4.79421e-05	AT4G26940
chr3	1143800	1144399	153	137	1.75189e-06	1.48386	1.50669e-05	AT3G04320
chr1	739600	740399	249	223	1.97004e-09	1.4836	5.71794e-08	AT1G03090
chr5	25558000	25558799	182	163	2.24547e-07	1.48356	2.75009e-06	AT5G63860
chr4	16020400	16021199	173	155	4.35606e-07	1.48298	4.76854e-06	AT4G33210
chr3	9665800	9666999	154	138	1.69794e-06	1.48273	1.46527e-05	AT3G26400
chr3	6536800	6538399	444	398	2.70417e-15	1.48225	7.61203e-13	AT3G18950
chr5	24184800	24185599	184	165	2.10948e-07	1.48168	2.61788e-06	AT5G60050
chr1	8994600	8995399	155	139	1.64549e-06	1.48163	1.4287e-05	AT1G25570
chr3	9753200	9753799	155	139	1.64549e-06	1.48163	1.4287e-05	AT3G26560
chr2	2959400	2960199	165	148	8.19939e-07	1.4813	7.98287e-06	AT2G07140
chr3	22249200	22250199	165	148	8.19939e-07	1.4813	7.98287e-06	AT3G60200
chr4	1025400	1026199	301	270	6.00533e-11	1.48124	2.99153e-09	AT4G02320
chr1	28448000	28448599	107	96	5.17463e-05	1.48093	0.000245991	AT1G75760
chr2	157400	157999	107	96	5.17463e-05	1.48093	0.000245991	AT2G01320
chr3	21336000	21336799	224	201	1.32888e-08	1.48072	2.70256e-07	AT3G57610
chr3	1753400	1753799	78	70	0.000426946	1.48053	0.00141774	AT3G05870
chr3	9235800	9236599	156	140	1.59452e-06	1.48053	1.39228e-05	AT3G25480
chr5	9687400	9687799	78	70	0.000426946	1.48053	0.00141774	AT5G27430
chr5	17007400	17007999	127	114	1.26172e-05	1.4802	7.65491e-05	AT5G42540
chr5	17155000	17155599	186	167	1.98111e-07	1.47985	2.4829e-06	AT5G42780
chr5	4937800	4938599	206	185	4.96287e-08	1.47951	8.03758e-07	AT5G15210
chr5	22593000	22593599	108	97	5.01264e-05	1.47936	0.00024019	AT5G55820
chr2	137000	137799	167	150	7.69881e-07	1.47927	7.58083e-06	AT2G01260
chr5	5951000	5951599	128	115	1.22231e-05	1.47888	7.45149e-05	AT5G17970
chr1	23169200	23169799	197	177	9.60315e-08	1.47882	1.39364e-06	AT1G62570
chr1	1368200	1368799	148	133	3.0086e-06	1.47853	2.35561e-05	AT1G04850
chr5	5422200	5423199	287	258	1.95858e-10	1.47803	8.19185e-09	AT5G16570
chr3	6911400	6912599	208	187	4.65978e-08	1.47789	7.61627e-07	AT3G19880
chr1	3453000	3453599	139	125	5.86837e-06	1.4775	4.1118e-05	AT1G10490
chr2	16666000	16666799	269	242	7.2506e-10	1.47692	2.40791e-08	AT2G39930
chr1	1156600	1157799	200	180	8.73389e-08	1.47631	1.2843e-06	AT1G04310
chr2	19005000	19005599	140	126	5.68409e-06	1.47631	4.00165e-05	AT2G46280
chr1	21941000	21941799	181	163	3.38417e-07	1.47541	3.85948e-06	AT1G59720
chr1	29946200	29946799	121	109	2.24563e-05	1.47496	0.000123123	AT1G79590
chr5	16872200	16872799	121	109	2.24563e-05	1.47496	0.000123123	AT5G42220
chr4	18059000	18059599	101	91	9.25938e-05	1.47469	0.000395963	AT4G38630
chr1	4954000	4955199	374	337	6.62813e-13	1.47456	7.08092e-11	AT1G14470
chr4	6622600	6623399	273	246	6.38912e-10	1.47451	2.1623e-08	AT4G10760
chr3	1361000	1361399	81	73	0.000387512	1.47429	0.00130711	AT3G04920
chr5	812800	813199	81	73	0.000387512	1.47429	0.00130711	AT5G03340
chr1	3071200	3072199	223	201	1.99342e-08	1.47411	3.80531e-07	AT1G09520
chr1	18201800	18202599	213	192	3.97616e-08	1.47401	6.66477e-07	AT1G49210
chr3	9680200	9680799	132	119	1.07543e-05	1.47383	6.70592e-05	AT3G26445
chr2	2924400	2924999	112	101	4.40807e-05	1.47339	0.000215768	AT2G07050
chr5	2912600	2914199	286	258	2.92478e-10	1.47288	1.13996e-08	AT5G09380
chr5	2912600	2914199	286	258	2.92478e-10	1.47288	1.13996e-08	AT5G09390
chr1	22051200	22052199	235	212	9.38494e-09	1.47283	2.01492e-07	AT1G59900
chr5	4783000	4783599	133	120	1.04129e-05	1.47262	6.54481e-05	AT5G14790
chr5	16921000	16921599	133	120	1.04129e-05	1.47262	6.54481e-05	AT5G42320
chr1	22465000	22465399	82	74	0.000375058	1.47232	0.00127151	AT1G60990
chr1	28530400	28530799	82	74	0.000375058	1.47232	0.00127151	AT1G76010
chr4	6897200	6897599	82	74	0.000375058	1.47232	0.00127151	AT4G11340
chr2	8581400	8581999	154	139	2.48314e-06	1.47207	2.01353e-05	AT2G19880
chr5	1697800	1698799	278	251	5.4491e-10	1.47161	1.88739e-08	AT5G05670
chr5	1697800	1698799	278	251	5.4491e-10	1.47161	1.88739e-08	AT5G05680
chr4	1370400	1371199	134	121	1.00813e-05	1.47143	6.36914e-05	AT4G03090
chr3	151800	152999	289	261	2.65794e-10	1.47122	1.05923e-08	AT3G01400
chr3	11077000	11077399	93	84	0.000177074	1.47104	0.000682361	AT3G29100
chr5	23384800	23386199	248	224	4.28229e-09	1.47104	1.05916e-07	AT5G57710
chr5	22054600	22055399	249	225	4.14715e-09	1.47041	1.03149e-07	AT5G54300
chr5	17803400	17803999	135	122	9.75938e-06	1.47026	6.2011e-05	AT5G44200
chr5	889400	889999	104	94	8.39797e-05	1.47003	0.000364934	AT5G03540
chr1	18436000	18437199	333	301	1.51265e-11	1.46994	9.47893e-10	AT1G49790
chr1	1900000	1900599	125	113	1.9727e-05	1.46978	0.000110185	AT1G06220
chr1	21035800	21036599	136	123	9.44686e-06	1.46911	6.04913e-05	AT1G56210
chr2	17805400	17805999	136	123	9.44686e-06	1.46911	6.04913e-05	AT2G42790
chr5	26558800	26559399	199	180	1.30828e-07	1.46893	1.78607e-06	AT5G66540
chr2	13553200	13553999	220	199	3.17632e-08	1.4689	5.52786e-07	AT2G31870
chr2	7481000	7481599	126	114	1.90932e-05	1.46854	0.000107373	AT2G17190
chr2	11493800	11494199	105	95	8.12698e-05	1.46854	0.000354679	AT2G26930
chr3	5826800	5827399	126	114	1.90932e-05	1.46854	0.000107373	AT3G17090
chr4	8571800	8572399	105	95	8.12698e-05	1.46854	0.000354679	AT4G15000
chr5	20249000	20249599	147	133	4.53464e-06	1.46854	3.32578e-05	AT5G49820
chr2	19104800	19105799	200	181	1.26661e-07	1.46816	1.74395e-06	AT2G46530
chr3	2059400	2061199	569	515	2.87499e-18	1.468	2.12438e-15	AT3G06600
chr3	2059400	2061199	569	515	2.87499e-18	1.468	2.12438e-15	AT3G06610
chr5	25019400	25020599	253	229	3.64619e-09	1.46793	9.19795e-08	AT5G62290
chr5	9798200	9798999	190	172	2.53343e-07	1.46773	3.02748e-06	AT5G27680
chr4	17414200	17414999	159	144	2.11125e-06	1.46709	1.76525e-05	AT4G36930
chr5	20580200	20580799	106	96	7.86378e-05	1.46709	0.000345531	AT5G50562
chr5	20580200	20580799	106	96	7.86378e-05	1.46709	0.000345531	AT5G50565
chr3	20232400	20233199	244	221	7.02672e-09	1.46696	1.58539e-07	AT3G54660
chr5	10368600	10369199	213	193	5.75211e-08	1.46637	9.07544e-07	AT5G28442
chr4	8991800	8993799	490	444	6.33498e-16	1.46634	2.22464e-13	AT4G15810
chr4	8991800	8993799	490	444	6.33498e-16	1.46634	2.22464e-13	AT4G15820
chr4	13732800	13734199	490	444	6.33498e-16	1.46634	2.22464e-13	AT4G27460
chr2	16946000	16946999	160	145	2.04338e-06	1.46613	1.71173e-05	AT2G40590
chr2	16946000	16946999	160	145	2.04338e-06	1.46613	1.71173e-05	AT2G40600
chr3	15753400	15754399	225	204	2.70114e-08	1.46546	4.89296e-07	AT3G43920
chr5	13833600	13833999	86	78	0.000328586	1.46496	0.00113745	AT5G35631
chr4	17999200	17999999	184	167	4.4521e-07	1.46394	4.84972e-06	AT4G38470
chr5	4033600	4034199	130	118	1.67395e-05	1.4638	9.63825e-05	AT5G12430
chr2	9353800	9355799	477	433	1.96682e-15	1.4637	6.01371e-13	AT2G21950
chr2	9353800	9355799	477	433	1.96682e-15	1.4637	6.01371e-13	AT2G21960
chr2	12874400	12875999	412	374	1.36861e-13	1.46368	1.95734e-11	AT2G30150
chr1	21843200	21844199	141	128	8.01758e-06	1.46363	5.28859e-05	AT1G59359
chr4	14858800	14859399	141	128	8.01758e-06	1.46363	5.28859e-05	AT4G30370
chr3	3399000	3400199	217	197	5.04882e-08	1.46357	8.15443e-07	AT3G10850
chr3	3399000	3400199	217	197	5.04882e-08	1.46357	8.15443e-07	AT3G10860
chr1	6760000	6760999	304	276	1.6386e-10	1.46348	6.98531e-09	AT1G19520
chr1	17569600	17570199	152	138	3.84918e-06	1.46348	2.89488e-05	AT1G47750
chr1	18175000	18175799	174	158	8.92483e-07	1.46323	8.55529e-06	AT1G49130
chr3	21894000	21895399	261	237	2.81245e-09	1.46323	7.55698e-08	AT3G59220
chr3	20386600	20387399	185	168	4.30836e-07	1.46313	4.72947e-06	AT3G55010
chr4	15924800	15925399	185	168	4.30836e-07	1.46313	4.72947e-06	AT4G33000
chr5	6230000	6230399	98	89	0.000150073	1.46304	0.000592344	AT5G18680
chr1	23730000	23730599	109	99	7.11939e-05	1.46289	0.000318665	AT1G63940
chr1	20189600	20190599	175	159	8.63585e-07	1.46239	8.32327e-06	AT1G54090
chr3	2526600	2527199	121	110	3.27914e-05	1.46155	0.000169047	AT3G07930
chr3	7207800	7208399	143	130	7.50406e-06	1.46155	5.01232e-05	AT3G20630
chr4	15543200	15543799	99	90	0.000145134	1.46155	0.000577736	AT4G32180
chr5	3944200	3944799	143	130	7.50406e-06	1.46155	5.01232e-05	AT5G12200
chr5	9764200	9764999	187	170	4.03396e-07	1.46155	4.50209e-06	AT5G27610
chr5	845600	846199	122	111	3.17153e-05	1.46035	0.000164216	AT5G03420
chr1	4495000	4495799	200	182	1.82584e-07	1.46009	2.32443e-06	AT1G13180
chr1	19509000	19509399	100	91	0.000140342	1.46009	0.000561684	AT1G52380
chr1	25574200	25574799	100	91	0.000140342	1.46009	0.000561684	AT1G68238
chr3	16624400	16624999	100	91	0.000140342	1.46009	0.000561684	AT3G45300
chr5	26963000	26963599	156	142	3.37171e-06	1.45968	2.60086e-05	AT5G67610
chr3	21918400	21918999	134	122	1.46553e-05	1.45937	8.65459e-05	AT3G59300
chr4	11426000	11426599	112	102	6.43935e-05	1.45895	0.000292959	AT4G21450
chr1	5103800	5104799	269	245	2.16366e-09	1.45884	6.07125e-08	AT1G14810
chr2	12425000	12425999	146	133	6.79094e-06	1.45855	4.63373e-05	AT2G28930
chr1	23468400	23469199	191	174	3.53408e-07	1.4585	4.01752e-06	AT1G63260
chr5	22419200	22420399	270	246	2.09352e-09	1.45831	5.91186e-08	AT5G55270
chr3	1837000	1837999	248	226	8.84977e-09	1.45802	1.92567e-07	AT3G06080
chr5	23116400	23117399	203	185	1.65322e-07	1.45796	2.14628e-06	AT5G57110
chr2	2336800	2337199	79	72	0.000611258	1.45786	0.00189644	AT2G06010
chr5	2056600	2057399	271	247	2.02558e-09	1.45779	5.82198e-08	AT5G06680
chr5	1062800	1063399	192	175	3.41865e-07	1.45776	3.89629e-06	AT5G03940
chr4	1205000	1206399	305	278	2.26765e-10	1.45773	9.26603e-09	AT4G02720
chr4	1205000	1206399	305	278	2.26765e-10	1.45773	9.26603e-09	AT4G02725
chr3	6313000	6314399	362	330	5.90148e-12	1.45753	4.34261e-10	AT3G18380
chr3	6313000	6314399	362	330	5.90148e-12	1.45753	4.34261e-10	AT3G18390
chr1	3194200	3194999	215	196	7.74394e-08	1.45748	1.16284e-06	AT1G09830
chr4	15909600	15910999	249	227	8.56195e-09	1.45745	1.88384e-07	AT4G32970
chr4	15909600	15910999	249	227	8.56195e-09	1.45745	1.88384e-07	AT4G32960
chr1	6537600	6538199	204	186	1.59923e-07	1.45727	2.09073e-06	AT1G18910
chr2	16038200	16038999	204	186	1.59923e-07	1.45727	2.09073e-06	AT2G38280
chr5	16826800	16827599	136	124	1.3706e-05	1.45727	8.17843e-05	AT5G42090
chr5	16826800	16827599	136	124	1.3706e-05	1.45727	8.17843e-05	AT5G42092
chr5	23985800	23986799	261	238	4.02742e-09	1.45709	1.00312e-07	AT5G59500
chr4	9965800	9966399	114	104	6.01956e-05	1.45644	0.000277419	AT4G17940
chr1	20080200	20082199	400	365	5.86575e-13	1.45609	6.38179e-11	AT1G53790
chr1	20080200	20082199	400	365	5.86575e-13	1.45609	6.38179e-11	AT1G53800
chr1	4590000	4590399	126	115	2.77284e-05	1.45577	0.000147006	AT1G13380
chr3	3239200	3239999	195	178	3.09352e-07	1.45558	3.58331e-06	AT3G10420
chr1	10513200	10513999	253	231	7.49837e-09	1.45522	1.68324e-07	AT1G30010
chr3	2622800	2623799	242	221	1.54331e-08	1.45494	3.05458e-07	AT3G08636
chr3	2622800	2623799	242	221	1.54331e-08	1.45494	3.05458e-07	AT3G08640
chr4	1228200	1229999	369	337	4.68512e-12	1.45485	3.58129e-10	AT4G02770
chr4	1228200	1229999	369	337	4.68512e-12	1.45485	3.58129e-10	AT4G02760
chr3	2483600	2485599	254	232	7.25312e-09	1.45468	1.63232e-07	AT3G07770
chr3	2483600	2485599	254	232	7.25312e-09	1.45468	1.63232e-07	AT3G07780
chr3	5131800	5132799	208	190	1.39966e-07	1.45456	1.88256e-06	AT3G15220
chr4	12171200	12172199	208	190	1.39966e-07	1.45456	1.88256e-06	AT4G23270
chr1	20030800	20031599	162	148	2.75872e-06	1.45437	2.19043e-05	AT1G53650
chr1	20470800	20471599	162	148	2.75872e-06	1.45437	2.19043e-05	AT1G54920
chr1	27444400	27445799	371	339	4.38512e-12	1.4541	3.44096e-10	AT1G72950
chr1	2510400	2510999	174	159	1.28425e-06	1.45403	1.15609e-05	AT1G08060
chr1	1049000	1051799	674	616	2.32295e-20	1.45379	3.16886e-17	AT1G04070
chr1	1049000	1051799	674	616	2.32295e-20	1.45379	3.16886e-17	AT1G04080
chr1	1049000	1051799	674	616	2.32295e-20	1.45379	3.16886e-17	AT1G04050
chr1	23263800	23264399	140	128	1.19773e-05	1.45325	7.32688e-05	AT1G62820
chr2	6989400	6989999	105	96	0.000118462	1.45325	0.000488617	AT2G16090
chr3	1595400	1595999	210	192	1.30906e-07	1.45325	1.78576e-06	AT3G05510
chr4	9724200	9724599	105	96	0.000118462	1.45325	0.000488617	AT4G17420
chr1	29922000	29923799	409	374	4.3568e-13	1.45303	4.98474e-11	AT1G79540
chr5	3167400	3168199	187	171	5.79175e-07	1.453	6.01e-06	AT5G10110
chr5	16590000	16590599	152	139	5.55116e-06	1.45295	3.92521e-05	AT5G41460
chr3	2523600	2523999	82	75	0.000551499	1.45269	0.00174523	AT3G07910
chr5	1176000	1176599	129	118	2.50496e-05	1.45254	0.000135024	AT5G04250
chr5	19158400	19159199	258	236	6.34741e-09	1.45254	1.45999e-07	AT5G47170
chr2	8797400	8798199	188	172	5.60019e-07	1.45228	5.86614e-06	AT2G20390
chr5	5591800	5592599	165	151	2.49335e-06	1.45187	2.0172e-05	AT5G17010
chr5	4046400	4047999	342	313	3.28695e-11	1.45179	1.78259e-09	AT5G12480
chr5	4046400	4047999	342	313	3.28695e-11	1.45179	1.78259e-09	AT5G12470
chr2	7615400	7615999	118	108	5.25471e-05	1.45171	0.000248831	AT2G17510
chr4	7343200	7343599	83	76	0.000532771	1.45106	0.0016987	AT4G12410
chr5	2701000	2701799	166	152	2.41042e-06	1.45106	1.96716e-05	AT5G08390
chr1	21989800	21990199	95	87	0.000242085	1.45086	0.000880103	AT1G59760
chr5	1254800	1255599	190	174	5.23509e-07	1.45086	5.55258e-06	AT5G04440
chr2	13037000	13037799	131	120	2.34003e-05	1.45048	0.000127412	AT2G30600
chr2	14615000	14615799	167	153	2.33012e-06	1.45026	1.91218e-05	AT2G34670
chr5	1056400	1056999	179	164	1.08497e-06	1.45021	1.00161e-05	AT5G03910
chr5	18695000	18695999	191	175	5.06121e-07	1.45016	5.39396e-06	AT5G46100
chr2	8576000	8576399	84	77	0.000514618	1.44947	0.00165121	AT2G19870
chr4	9656000	9656399	96	88	0.000233875	1.44947	0.000856397	AT4G17215
chr5	750000	750799	216	198	1.06984e-07	1.44947	1.52146e-06	AT5G03160
chr2	18157600	18158799	326	299	1.12778e-10	1.44866	5.14141e-09	AT2G43840
chr1	29016000	29016599	97	89	0.00022592	1.44812	0.000832773	AT1G77230
chr1	29016000	29016599	97	89	0.00022592	1.44812	0.000832773	AT1G77235
chr4	14742200	14743199	316	290	2.23453e-10	1.44781	9.15178e-09	AT4G30150
chr1	12530800	12531599	207	190	2.06542e-07	1.44757	2.57582e-06	AT1G34340
chr3	20997800	20998799	268	246	4.5367e-09	1.44751	1.11278e-07	AT3G56690
chr5	3461200	3461799	134	123	2.11169e-05	1.44751	0.000116918	AT5G10950
chr4	7668400	7669199	183	168	9.47205e-07	1.44732	8.98275e-06	AT4G13200
chr4	16167600	16168199	98	90	0.000218216	1.44679	0.000809676	AT4G33660
chr5	6652600	6652999	98	90	0.000218216	1.44679	0.000809676	AT5G19690
chr3	20235600	20236399	197	181	4.12883e-07	1.44614	4.57915e-06	AT3G54670
chr4	222200	222999	234	215	4.09198e-08	1.4461	6.82022e-07	AT4G00490
chr2	15787800	15788399	111	102	9.63645e-05	1.44592	0.000409619	AT2G37640
chr3	16569000	16569599	185	170	8.84782e-07	1.44592	8.49525e-06	AT3G45230
chr5	18013200	18013999	148	136	9.11765e-06	1.44592	5.87545e-05	AT5G44650
chr2	7545600	7546799	210	193	1.86523e-07	1.44572	2.36694e-06	AT2G17350
chr2	7545600	7546799	210	193	1.86523e-07	1.44572	2.36694e-06	AT2G17360
chr5	4928600	4929599	210	193	1.86523e-07	1.44572	2.36694e-06	AT5G15170
chr5	4928600	4929599	210	193	1.86523e-07	1.44572	2.36694e-06	AT5G15175
chr4	18138600	18139199	173	159	1.89942e-06	1.44567	1.60938e-05	AT4G38890
chr5	771800	772799	136	125	1.97134e-05	1.44561	0.000110214	AT5G03240
chr5	16968800	16969199	99	91	0.000210756	1.44549	0.000787016	AT5G42420
chr1	28696000	28696999	186	171	8.55073e-07	1.44523	8.26143e-06	AT1G76490
chr3	18913400	18914199	186	171	8.55073e-07	1.44523	8.26143e-06	AT3G50880
chr5	2874000	2874999	149	137	8.80962e-06	1.44506	5.71433e-05	AT5G09240
chr1	9779200	9779799	112	103	9.30785e-05	1.44478	0.000397652	AT1G28060
chr5	7098000	7098799	187	172	8.26326e-07	1.44456	8.03403e-06	AT5G20930
chr3	19412200	19412599	75	69	0.00102632	1.44422	0.00290283	AT3G52360
chr4	5731400	5732199	175	161	1.77365e-06	1.44422	1.51878e-05	AT4G08940
chr3	9689800	9690999	388	357	3.51288e-12	1.44406	2.84463e-10	AT3G26480
chr1	22351000	22352199	252	232	1.56588e-08	1.44322	3.09235e-07	AT1G60690
chr1	22351000	22352199	252	232	1.56588e-08	1.44322	3.09235e-07	AT1G60700
chr1	5219400	5221599	479	441	1.48865e-14	1.44317	3.21947e-12	AT1G15165
chr1	5219400	5221599	479	441	1.48865e-14	1.44317	3.21947e-12	AT1G15170
chr4	18189600	18190599	253	233	1.5134e-08	1.44273	3.00544e-07	AT4G39040
chr1	12010800	12011599	152	140	7.944e-06	1.44257	5.24786e-05	AT1G33120
chr4	8198800	8199799	152	140	7.944e-06	1.44257	5.24786e-05	AT4G14225
chr4	8198800	8199799	152	140	7.944e-06	1.44257	5.24786e-05	AT4G14226
chr1	21013000	21013999	216	199	1.51962e-07	1.44219	2.00364e-06	AT1G56145
chr1	19850200	19851799	420	387	6.0078e-13	1.44198	6.49648e-11	AT1G53230
chr1	19850200	19851799	420	387	6.0078e-13	1.44198	6.49648e-11	AT1G53233
chr1	27029200	27029599	102	94	0.000189773	1.44176	0.000721731	AT1G71865
chr3	17800600	17801799	269	248	6.20404e-09	1.44119	1.43258e-07	AT3G48190
chr1	25766000	25766999	282	260	2.82049e-09	1.44111	7.56711e-08	AT1G68620
chr5	24918600	24919599	218	201	1.41888e-07	1.44106	1.90192e-06	AT5G62030
chr5	3408400	3408799	77	71	0.000956116	1.44097	0.00274365	AT5G10780
chr1	5457200	5457999	167	154	3.32307e-06	1.44084	2.56949e-05	AT1G15870
chr3	5742400	5743199	167	154	3.32307e-06	1.44084	2.56949e-05	AT3G16840
chr1	24050000	24051199	257	237	1.32008e-08	1.44081	2.69083e-07	AT1G64740
chr2	19343600	19345199	348	321	5.35978e-11	1.44044	2.70029e-09	AT2G47090
chr2	19343600	19345199	348	321	5.35978e-11	1.44044	2.70029e-09	AT2G47100
chr2	19343600	19345199	348	321	5.35978e-11	1.44044	2.70029e-09	AT2G47110
chr2	19343600	19345199	348	321	5.35978e-11	1.44044	2.70029e-09	AT2G47115
chr4	17615000	17615599	116	107	8.09588e-05	1.44044	0.000353714	AT4G37460
chr5	26554800	26555799	220	203	1.32463e-07	1.43995	1.80423e-06	AT5G66530
chr1	8531600	8532199	143	132	1.54673e-05	1.43941	9.03187e-05	AT1G24120
chr5	2046800	2047599	156	144	6.91575e-06	1.43941	4.6972e-05	AT5G06660
chr4	7657400	7658399	300	277	1.08182e-09	1.43901	3.37763e-08	AT4G13180
chr2	1515600	1516399	209	193	2.73582e-07	1.43883	3.22586e-06	AT2G04350
chr5	2119000	2119599	131	121	3.35124e-05	1.43849	0.000171915	AT5G06830
chr3	22705000	22706799	474	438	3.47274e-14	1.43789	6.55165e-12	AT3G61360
chr3	22705000	22706799	474	438	3.47274e-14	1.43789	6.55165e-12	AT3G61370
chr3	504600	506199	211	195	2.55316e-07	1.4377	3.04082e-06	AT3G02450
chr3	504600	506199	211	195	2.55316e-07	1.4377	3.04082e-06	AT3G02460
chr1	27752400	27753199	277	256	4.71625e-09	1.43768	1.14887e-07	AT1G73810
chr3	7595800	7597399	475	439	3.3564e-14	1.43764	6.40025e-12	AT3G21560
chr1	26814600	26815599	291	269	2.07222e-09	1.43735	5.88923e-08	AT1G71100
chr5	842600	843199	106	98	0.00016483	1.43715	0.000641029	AT5G03415
chr1	22542600	22542999	93	86	0.000374963	1.43683	0.00127168	AT1G61150
chr5	20303400	20304399	213	197	2.38239e-07	1.4366	2.88195e-06	AT5G49910
chr1	11359600	11360199	120	111	7.03427e-05	1.43641	0.000315174	AT1G31730
chr1	20790400	20791199	160	148	6.01609e-06	1.43641	4.20368e-05	AT1G55620
chr2	13449400	13450799	307	284	8.50797e-10	1.43629	2.73334e-08	AT2G31600
chr2	13449400	13450799	307	284	8.50797e-10	1.43629	2.73334e-08	AT2G31610
chr2	17866800	17867599	227	210	1.04037e-07	1.43624	1.4843e-06	AT2G42955
chr2	14130400	14131199	187	173	1.17163e-06	1.43621	1.06606e-05	AT2G33340
chr4	12650000	12651199	308	285	8.22022e-10	1.43591	2.64569e-08	AT4G24480
chr3	21726800	21727599	201	186	5.09832e-07	1.43583	5.42699e-06	AT3G58750
chr5	5299800	5300799	228	211	1.00495e-07	1.43573	1.44482e-06	AT5G16220
chr5	6894800	6895799	228	211	1.00495e-07	1.43573	1.44482e-06	AT5G20400
chr1	30026600	30027399	121	112	6.79036e-05	1.43545	0.000306842	AT1G79820
chr2	5536600	5537199	121	112	6.79036e-05	1.43545	0.000306842	AT2G13350
chr3	188400	189199	148	137	1.29864e-05	1.43537	7.844e-05	AT3G01480
chr1	4983600	4983999	81	75	0.000828753	1.43498	0.00243289	AT1G14570
chr2	12255000	12255599	135	125	2.91209e-05	1.43498	0.000153175	AT2G28605
chr5	1588400	1588999	135	125	2.91209e-05	1.43498	0.000153175	AT5G05360
chr3	18806600	18808199	433	401	5.40787e-13	1.43471	5.99394e-11	AT3G50650
chr1	26048600	26049399	244	226	4.10109e-08	1.43451	6.82899e-07	AT1G69290
chr2	7703800	7705199	258	239	1.79621e-08	1.43431	3.48321e-07	AT2G17730
chr3	22095800	22096999	258	239	1.79621e-08	1.43431	3.48321e-07	AT3G59800
chr3	22095800	22096999	258	239	1.79621e-08	1.43431	3.48321e-07	AT3G59810
chr3	9475600	9476799	231	214	9.05632e-08	1.43423	1.32951e-06	AT3G25890
chr2	17177600	17178399	204	189	4.59296e-07	1.43413	4.9787e-06	AT2G41220
chr4	13160000	13160599	177	164	2.34663e-06	1.43401	1.92218e-05	AT4G25890
chr3	19926200	19926799	150	139	1.21053e-05	1.43383	7.39619e-05	AT3G53780
chr5	24359000	24359799	150	139	1.21053e-05	1.43383	7.39619e-05	AT5G60600
chr5	269600	270399	301	279	1.46795e-09	1.43345	4.40483e-08	AT5G01720
chr2	14066400	14067199	165	153	5.04943e-06	1.43289	3.63567e-05	AT2G33180
chr4	15515400	15515999	110	102	0.000143009	1.43289	0.000570554	AT4G32110
chr1	17957000	17958599	372	345	2.3537e-11	1.43267	1.35521e-09	AT1G48580
chr1	17957000	17958599	372	345	2.3537e-11	1.43267	1.35521e-09	AT1G48570
chr1	26661400	26662999	304	282	1.32315e-09	1.43234	4.03176e-08	AT1G70710
chr1	18148400	18148999	166	154	4.87502e-06	1.43222	3.53521e-05	AT1G49040
chr4	6188800	6189199	83	77	0.000771157	1.43222	0.00229074	AT4G09830
chr4	8202600	8203199	166	154	4.87502e-06	1.43222	3.53521e-05	AT4G14230
chr5	24226200	24226799	125	116	5.89313e-05	1.43177	0.000272584	AT5G60160
chr1	8281400	8282199	209	194	3.85713e-07	1.43142	4.34301e-06	AT1G23330
chr2	17026200	17026999	237	220	7.34921e-08	1.43135	1.11394e-06	AT2G40800
chr3	2518200	2518799	126	117	5.68726e-05	1.43089	0.000264858	AT3G07890
chr1	22748400	22749199	211	196	3.59619e-07	1.43037	4.0829e-06	AT1G61640
chr2	7978600	7979199	183	170	1.90109e-06	1.43029	1.61003e-05	AT2G18360
chr3	57000	58399	310	288	1.07443e-09	1.43018	3.36048e-08	AT3G01160
chr3	57000	58399	310	288	1.07443e-09	1.43018	3.36048e-08	AT3G01170
chr3	4912400	4913199	155	144	1.01477e-05	1.43018	6.40197e-05	AT3G14610
chr3	6427400	6427999	127	118	5.4883e-05	1.43002	0.000257827	AT3G18680
chr5	7933400	7934399	353	328	8.86026e-11	1.42995	4.17893e-09	AT5G23530
chr3	20815200	20815999	226	210	1.51467e-07	1.42992	2.00307e-06	AT3G56090
chr5	5403200	5406399	596	554	7.19505e-17	1.42941	3.35782e-14	AT5G16540
chr5	5403200	5406399	596	554	7.19505e-17	1.42941	3.35782e-14	AT5G16550
chr5	18940800	18942399	370	344	3.52115e-11	1.42911	1.86958e-09	AT5G46680
chr1	23945200	23945799	100	93	0.000291783	1.42869	0.00102801	AT1G64470
chr2	10845000	10845599	100	93	0.000291783	1.42869	0.00102801	AT2G25480
chr2	15405200	15406599	272	253	1.10344e-08	1.42847	2.32403e-07	AT2G36730
chr2	12129400	12129999	129	120	5.11031e-05	1.42833	0.000243554	AT2G28360
chr3	21177600	21177999	86	80	0.000691764	1.42833	0.00209347	AT3G57230
chr1	9997000	9998399	201	187	7.1756e-07	1.42816	7.11303e-06	AT1G28440
chr3	17575200	17575599	115	107	0.000119589	1.42802	0.000492291	AT3G47670
chr3	18916400	18916999	187	174	1.65103e-06	1.42795	1.4321e-05	AT3G50890
chr4	100400	101399	187	174	1.65103e-06	1.42795	1.4321e-05	AT4G00232
chr4	100400	101399	187	174	1.65103e-06	1.42795	1.4321e-05	AT4G00234
chr3	6757600	6758199	144	134	2.11708e-05	1.42784	0.000117107	AT3G19490
chr3	18836600	18837399	173	161	3.80781e-06	1.42772	2.8723e-05	AT3G50690
chr1	28428800	28429599	202	188	6.92707e-07	1.42763	6.91693e-06	AT1G75710
chr5	18974200	18974799	101	94	0.00028144	1.42763	0.00099861	AT5G46760
chr1	19136400	19136999	130	121	4.93086e-05	1.42751	0.000236847	AT1G51610
chr1	4238000	4238799	188	175	1.59371e-06	1.42739	1.39226e-05	AT1G12430
chr5	1098400	1099799	247	230	5.17827e-08	1.42689	8.30303e-07	AT5G04060
chr5	1098400	1099799	247	230	5.17827e-08	1.42689	8.30303e-07	AT5G04050
chr4	13725400	13726599	218	203	2.81186e-07	1.42686	3.30017e-06	AT4G27440
chr5	21361600	21361999	102	95	0.000271447	1.42659	0.000970143	AT5G52660
chr1	18678400	18679799	292	272	3.9249e-09	1.42638	9.80341e-08	AT1G50420
chr3	1949000	1949599	146	136	1.97136e-05	1.42638	0.000110163	AT3G06410
chr5	7329000	7329599	146	136	1.97136e-05	1.42638	0.000110163	AT5G22100
chr4	15987200	15987999	117	109	0.000111292	1.4262	0.000463298	AT4G33150
chr3	21872800	21873599	205	191	6.23094e-07	1.42607	6.35054e-06	AT3G59150
chr2	12620800	12621199	88	82	0.000643198	1.4259	0.00197772	AT2G29440
chr3	4636400	4636799	88	82	0.000643198	1.4259	0.00197772	AT3G14010
chr2	13285000	13285799	235	219	1.10409e-07	1.42576	1.55643e-06	AT2G31170
chr2	10972200	10972999	191	178	1.43317e-06	1.42572	1.27143e-05	AT2G25730
chr1	25520000	25521599	294	274	3.65921e-09	1.42567	9.21769e-08	AT1G68090
chr1	25520000	25521599	294	274	3.65921e-09	1.42567	9.21769e-08	AT1G68100
chr1	30207600	30208199	147	137	1.9022e-05	1.42567	0.000107057	AT1G80350
chr5	16973600	16974599	250	233	4.65988e-08	1.42563	7.60942e-07	AT5G42440
chr4	8651600	8652199	118	110	0.000107354	1.42531	0.000449437	AT4G15180
chr2	8309800	8310399	133	124	4.42828e-05	1.42512	0.000216578	AT2G19160
chr4	8304800	8305599	207	193	5.80539e-07	1.42506	6.02063e-06	AT4G14430
chr4	1939200	1939799	119	111	0.000103551	1.42444	0.000435364	AT4G04040
chr5	18272600	18273199	149	139	1.77087e-05	1.42427	0.000100915	AT5G45170
chr3	17498400	17499199	179	167	3.07714e-06	1.42416	2.40079e-05	AT3G47490
chr1	6348000	6348799	194	181	1.28848e-06	1.42411	1.15871e-05	AT1G18450
chr2	15286400	15287199	194	181	1.28848e-06	1.42411	1.15871e-05	AT2G36420
chr5	19820000	19820999	194	181	1.28848e-06	1.42411	1.15871e-05	AT5G48890
chr5	26534600	26535399	209	195	5.40836e-07	1.42408	5.71244e-06	AT5G66450
chr3	20986800	20988399	494	461	4.70852e-14	1.42379	8.02892e-12	AT3G56660
chr1	24025800	24026399	135	126	4.12118e-05	1.42359	0.000204377	AT1G64650
chr1	29286600	29287199	165	154	7.11114e-06	1.42359	4.80598e-05	AT1G77880
chr3	19878000	19878399	75	70	0.0014824	1.42359	0.00392312	AT3G53610
chr4	13463000	13463999	270	252	1.65181e-08	1.42359	3.23682e-07	AT4G26700
chr5	1413400	1414599	285	266	6.99292e-09	1.42359	1.58179e-07	AT5G04860
chr2	9095400	9096799	196	183	1.20006e-06	1.42307	1.08859e-05	AT2G21230
chr2	9095400	9096799	196	183	1.20006e-06	1.42307	1.08859e-05	AT2G21235
chr1	16755200	16755999	181	169	2.86551e-06	1.42303	2.25903e-05	AT1G44080
chr1	20605000	20606199	181	169	2.86551e-06	1.42303	2.25903e-05	AT1G55240
chr2	17202200	17202599	121	113	9.63306e-05	1.42275	0.000409572	AT2G41250
chr5	5120600	5121799	425	397	2.67812e-12	1.42239	2.29439e-10	AT5G15700
chr4	1611600	1612199	167	156	6.62037e-06	1.42237	4.53829e-05	AT4G03635
chr2	7553000	7553399	76	71	0.00142862	1.42225	0.00379952	AT2G17380
chr2	16234200	16235199	304	284	2.5747e-09	1.42225	6.9816e-08	AT2G38860
chr5	19311600	19312199	152	142	1.59027e-05	1.42225	9.25866e-05	AT5G47650
chr5	9584200	9585399	274	256	1.43438e-08	1.42211	2.87751e-07	AT5G27230
chr3	21755800	21756799	183	171	2.66814e-06	1.42192	2.13042e-05	AT3G58830
chr1	19454000	19454599	107	100	0.000226381	1.42169	0.000834123	AT1G52220
chr1	2076600	2077799	306	286	2.39943e-09	1.4216	6.59712e-08	AT1G06760
chr4	18325000	18326199	153	143	1.53416e-05	1.4216	8.9821e-05	AT4G39400
chr5	6128000	6128799	184	172	2.5745e-06	1.42138	2.0673e-05	AT5G18470
chr5	25893000	25893599	184	172	2.5745e-06	1.42138	2.0673e-05	AT5G64750
chr4	452600	453999	353	330	1.71463e-10	1.42129	7.29192e-09	AT4G01037
chr4	452600	453999	353	330	1.71463e-10	1.42129	7.29192e-09	AT4G01040
chr5	19294200	19294799	123	115	8.95989e-05	1.42111	0.000385199	AT5G47570
chr5	9943800	9944799	277	259	1.29005e-08	1.42102	2.6479e-07	AT5G27920
chr1	29420400	29420999	154	144	1.47998e-05	1.42095	8.71524e-05	AT1G78200
chr2	16660000	16661399	231	216	1.77494e-07	1.42095	2.27269e-06	AT2G39900
chr2	16660000	16661399	231	216	1.77494e-07	1.42095	2.27269e-06	AT2G39910
chr3	7323800	7324199	77	72	0.0013767	1.42095	0.0036852	AT3G20898
chr3	7323800	7324199	77	72	0.0013767	1.42095	0.0036852	AT3G20900
chr4	9601400	9602399	154	144	1.47998e-05	1.42095	8.71524e-05	AT4G17080
chr3	9295400	9296199	170	159	5.94567e-06	1.4206	4.15939e-05	AT3G25585
chr5	1168400	1169799	201	188	1.00423e-06	1.42056	9.39787e-06	AT5G04238
chr5	1168400	1169799	201	188	1.00423e-06	1.42056	9.39787e-06	AT5G04240
chr3	19469600	19470399	186	174	2.3968e-06	1.42032	1.95875e-05	AT3G52510
chr1	26363600	26364599	202	189	9.69006e-07	1.42007	9.1212e-06	AT1G70000
chr1	25296400	25298199	342	320	3.5019e-10	1.42003	1.30742e-08	AT1G67510
chr1	25296400	25298199	342	320	3.5019e-10	1.42003	1.30742e-08	AT1G67500
chr4	15135800	15136799	328	307	7.95515e-10	1.41957	2.59332e-08	AT4G31120
chr5	19900200	19900999	344	322	3.26326e-10	1.41946	1.2392e-08	AT5G49110
chr1	6932200	6933599	360	337	1.33987e-10	1.41936	5.89608e-09	AT1G19970
chr1	6932200	6933599	360	337	1.33987e-10	1.41936	5.89608e-09	AT1G19980
chr1	16926400	16927199	235	220	1.53952e-07	1.41928	2.02837e-06	AT1G44820
chr2	7646400	7646799	94	88	0.000516251	1.41928	0.0016554	AT2G17580
chr4	7915000	7916399	282	264	1.08069e-08	1.41928	2.28427e-07	AT4G13610
chr5	22890800	22891399	94	88	0.000516251	1.41928	0.0016554	AT5G56530
chr1	24817800	24818799	204	191	9.02164e-07	1.41912	8.62944e-06	AT1G66520
chr4	7260600	7261199	157	147	1.32841e-05	1.41907	7.98036e-05	AT4G12120
chr4	2757200	2759399	534	500	8.40617e-15	1.41903	2.01453e-12	AT4G05440
chr4	2757200	2759399	534	500	8.40617e-15	1.41903	2.01453e-12	AT4G05450
chr1	27951200	27951599	110	103	0.0002029	1.41898	0.000762174	AT1G74340
chr1	27951200	27951599	110	103	0.0002029	1.41898	0.000762174	AT1G74350
chr2	10988200	10988799	110	103	0.0002029	1.41898	0.000762174	AT2G25760
chr5	22372000	22372599	110	103	0.0002029	1.41898	0.000762174	AT5G55125
chr5	26281800	26283599	393	368	2.18609e-11	1.41895	1.29227e-09	AT5G65700
chr1	11162600	11163199	173	162	5.3384e-06	1.4189	3.79748e-05	AT1G31230
chr4	18219400	18220199	173	162	5.3384e-06	1.4189	3.79748e-05	AT4G39100
chr5	10526800	10527599	173	162	5.3384e-06	1.4189	3.79748e-05	AT5G28530
chr5	3670800	3672399	362	339	1.24856e-10	1.41883	5.5633e-09	AT5G11490
chr5	3670800	3672399	362	339	1.24856e-10	1.41883	5.5633e-09	AT5G11480
chr5	17592400	17593399	331	310	7.1547e-10	1.41869	2.38499e-08	AT5G43790
chr4	1558800	1559399	95	89	0.000497582	1.41826	0.00160614	AT4G03510
chr5	9490200	9490799	111	104	0.00019561	1.41811	0.000739332	AT5G26980
chr2	18316200	18316999	143	134	3.08701e-05	1.41792	0.000160708	AT2G44350
chr3	18455600	18456199	143	134	3.08701e-05	1.41792	0.000160708	AT3G49760
chr4	11530000	11530799	191	179	2.00349e-06	1.41776	1.68628e-05	AT4G21700
chr3	4746000	4746999	319	299	1.51512e-09	1.41756	4.52341e-08	AT3G14250
chr2	6743800	6744799	399	374	1.76904e-11	1.4175	1.08367e-09	AT2G15440
chr5	2175000	2176199	399	374	1.76904e-11	1.4175	1.08367e-09	AT5G07010
chr1	5854200	5854599	80	75	0.00123152	1.41726	0.00337189	AT1G17130
chr1	20277200	20277799	96	90	0.000479564	1.41726	0.00155762	AT1G54320
chr5	18930400	18931199	288	270	8.73344e-09	1.41726	1.90973e-07	AT5G46650
chr4	17004600	17005599	241	226	1.24291e-07	1.41687	1.71398e-06	AT4G35900
chr1	9526600	9527199	129	121	7.20313e-05	1.41653	0.00032144	AT1G27430
chr5	9476600	9478399	404	379	1.48251e-11	1.41633	9.32301e-10	AT5G26920
chr1	9940200	9940599	97	91	0.000462178	1.41629	0.00151139	AT1G28340
chr3	22828000	22828599	97	91	0.000462178	1.41629	0.00151139	AT3G61690
chr5	14425600	14425999	97	91	0.000462178	1.41629	0.00151139	AT5G36710
chr5	20851600	20852399	178	167	4.45866e-06	1.4162	3.27547e-05	AT5G51300
chr2	9149600	9150199	162	152	1.10886e-05	1.4161	6.87814e-05	AT2G21385
chr1	22473600	22474199	130	122	6.94498e-05	1.41581	0.000311882	AT1G61000
chr2	18597800	18598599	195	183	1.73513e-06	1.41581	1.49518e-05	AT2G45100
chr2	8653600	8654599	179	168	4.30062e-06	1.41568	3.17648e-05	AT2G20050
chr5	19313000	19314399	228	214	2.74694e-07	1.41561	3.23468e-06	AT5G47660
chr5	15438800	15439799	163	153	1.06943e-05	1.41553	6.67557e-05	AT5G38560
chr3	2612400	2613599	359	337	1.91893e-10	1.41542	8.06404e-09	AT3G08600
chr1	6134600	6135199	147	138	2.6697e-05	1.41534	0.000142304	AT1G17820
chr1	26672400	26672799	98	92	0.000445402	1.41534	0.00146885	AT1G70730
chr5	12560000	12560599	98	92	0.000445402	1.41534	0.00146885	AT5G33290
chr4	110200	110999	262	246	4.23295e-08	1.4151	6.98299e-07	AT4G00240
chr4	16967600	16967999	82	77	0.001143	1.41496	0.00317016	AT4G35800
chr5	3157600	3158399	164	154	1.03137e-05	1.41496	6.49286e-05	AT5G10100
chr5	15825000	15825599	115	108	0.000168912	1.4148	0.00065561	AT5G39520
chr5	22485200	22485999	214	201	6.30273e-07	1.41462	6.40163e-06	AT5G55507
chr5	22485200	22485999	214	201	6.30273e-07	1.41462	6.40163e-06	AT5G55508
chr1	25053600	25054799	346	325	4.20287e-10	1.41454	1.51184e-08	AT1G67100
chr5	2112800	2113599	231	217	2.46667e-07	1.4144	2.9677e-06	AT5G06820
chr2	14590000	14591799	281	264	1.5513e-08	1.41424	3.06697e-07	AT2G34650
chr5	23996600	23997799	182	171	3.85881e-06	1.41415	2.9009e-05	AT5G59540
chr3	708800	709599	265	249	3.80225e-08	1.41406	6.40962e-07	AT3G03110
chr1	2215200	2215799	232	218	2.37967e-07	1.41401	2.88259e-06	AT1G07210
chr1	30080000	30080799	116	109	0.000162812	1.41401	0.000634295	AT1G79960
chr5	503400	504399	348	327	3.91426e-10	1.41401	1.4283e-08	AT5G02370
chr3	535800	537799	350	329	3.64531e-10	1.41349	1.34679e-08	AT3G02540
chr3	535800	537799	350	329	3.64531e-10	1.41349	1.34679e-08	AT3G02550
chr3	8268200	8268799	100	94	0.000413602	1.41349	0.00137898	AT3G23170
chr3	8122800	8123399	217	204	5.65765e-07	1.41335	5.90541e-06	AT3G22920
chr4	13841600	13842399	167	157	9.25005e-06	1.41331	5.95212e-05	AT4G27750
chr5	18689800	18690599	184	173	3.58939e-06	1.41317	2.73547e-05	AT5G46080
chr4	7948600	7949399	251	236	8.68813e-08	1.41313	1.27969e-06	AT4G13670
chr1	901000	901799	151	142	2.30777e-05	1.4129	0.000125965	AT1G03610
chr3	10424200	10424999	168	158	8.92003e-06	1.41278	5.77328e-05	AT3G28030
chr2	10361000	10361999	269	253	3.29469e-08	1.41271	5.69197e-07	AT2G24350
chr5	6006000	6007399	269	253	3.29469e-08	1.41271	5.69197e-07	AT5G18170
chr1	23178600	23180199	303	285	5.11568e-09	1.4126	1.22431e-07	AT1G62590
chr1	23178600	23180199	303	285	5.11568e-09	1.4126	1.22431e-07	AT1G62600
chr4	10984200	10985399	253	238	8.08613e-08	1.41242	1.20707e-06	AT4G20330
chr4	10984200	10985399	253	238	8.08613e-08	1.41242	1.20707e-06	AT4G20340
chr1	20302800	20303799	270	254	3.17865e-08	1.41238	5.52649e-07	AT1G54385
chr1	11527600	11528799	287	270	1.25164e-08	1.41234	2.578e-07	AT1G32050
chr1	10016000	10016399	85	80	0.00102162	1.41173	0.00289162	AT1G28490
chr2	1016400	1016999	119	112	0.000145775	1.41173	0.000579569	AT2G03340
chr2	16484400	16484999	102	96	0.000384011	1.41173	0.00129678	AT2G39480
chr3	1603400	1603999	119	112	0.000145775	1.41173	0.000579569	AT3G05530
chr3	10044000	10044399	85	80	0.00102162	1.41173	0.00289162	AT3G27200
chr4	1038000	1038799	170	160	8.29434e-06	1.41173	5.4418e-05	AT4G02350
chr4	12209200	12209799	102	96	0.000384011	1.41173	0.00129678	AT4G23370
chr4	16405600	16406199	119	112	0.000145775	1.41173	0.000579569	AT4G34270
chr5	4775000	4775999	340	320	7.17553e-10	1.41173	2.38745e-08	AT5G14770
chr5	8610600	8611399	221	208	4.89786e-07	1.41173	5.25461e-06	AT5G24990
chr4	13945400	13946599	359	338	2.64471e-10	1.41123	1.05634e-08	AT4G28060
chr4	13945400	13946599	359	338	2.64471e-10	1.41123	1.05634e-08	AT4G28068
chr4	13945400	13946599	359	338	2.64471e-10	1.41123	1.05634e-08	AT4G28070
chr5	1912800	1913599	257	242	7.00313e-08	1.41104	1.06879e-06	AT5G06270
chr3	22117600	22118199	120	113	0.000140492	1.41099	0.000561906	AT3G59870
chr5	15911600	15912399	189	178	2.99423e-06	1.41079	2.34643e-05	AT5G39760
chr2	11662000	11662399	86	81	0.000984008	1.4107	0.00280508	AT2G27240
chr2	18939200	18939999	207	195	1.12492e-06	1.41045	1.03204e-05	AT2G46050
chr5	22201400	22201999	138	130	5.18088e-05	1.41045	0.000246057	AT5G54650
chr2	11595200	11595799	156	147	1.92247e-05	1.41003	0.000107975	AT2G27130
chr2	18996000	18996599	156	147	1.92247e-05	1.41003	0.000107975	AT2G46260
chr4	11902200	11902599	104	98	0.000356486	1.41003	0.00121739	AT4G22610
chr5	3618200	3619799	399	376	3.35597e-11	1.40996	1.79803e-09	AT5G11330
chr5	3618200	3619799	399	376	3.35597e-11	1.40996	1.79803e-09	AT5G11340
chr1	7953800	7954399	139	131	4.99392e-05	1.40982	0.000239422	AT1G22520
chr1	6616600	6617599	261	246	6.06382e-08	1.4097	9.49963e-07	AT1G19170
chr1	17164200	17164799	122	115	0.000130483	1.40956	0.000530428	AT1G45248
chr3	16840800	16841599	122	115	0.000130483	1.40956	0.000530428	AT3G45820
chr3	16840800	16841599	122	115	0.000130483	1.40956	0.000530428	AT3G45830
chr3	23060000	23060599	122	115	0.000130483	1.40956	0.000530428	AT3G62310
chr1	6728800	6729799	280	264	2.21922e-08	1.40921	4.17789e-07	AT1G19440
chr1	21807000	21807599	105	99	0.000343454	1.40921	0.00117993	AT1G58983
chr1	27920200	27920999	175	165	6.91289e-06	1.40921	4.69706e-05	AT1G74250
chr5	19541400	19542199	193	182	2.58909e-06	1.40899	2.07666e-05	AT5G48180
chr3	2942800	2943999	457	431	1.64032e-12	1.40884	1.50723e-10	AT3G09580
chr1	277800	279399	423	399	1.03785e-11	1.4086	6.91929e-10	AT1G01760
chr1	277800	279399	423	399	1.03785e-11	1.4086	6.91929e-10	AT1G01770
chr1	29549600	29550599	247	233	1.38605e-07	1.40852	1.86921e-06	AT1G78570
chr1	18087400	18087999	106	100	0.000330889	1.4084	0.00114408	AT1G48900
chr5	23229600	23230599	159	150	1.72244e-05	1.4084	9.85028e-05	AT5G57345
chr3	22932600	22933199	266	251	5.06331e-08	1.40809	8.16297e-07	AT3G61920
chr4	16838600	16839999	337	318	1.09892e-09	1.40807	3.42501e-08	AT4G35440
chr4	16838600	16839999	337	318	1.09892e-09	1.40807	3.42501e-08	AT4G35450
chr3	4666600	4667999	213	201	9.04904e-07	1.40801	8.64399e-06	AT3G14075
chr3	4666600	4667999	213	201	9.04904e-07	1.40801	8.64399e-06	AT3G14080
chr4	711800	712599	213	201	9.04904e-07	1.40801	8.64399e-06	AT4G01670
chr5	16791200	16791799	160	151	1.66043e-05	1.40788	9.5775e-05	AT5G41970
chr5	17806600	17807199	160	151	1.66043e-05	1.40788	9.5775e-05	AT5G44210
chr1	25874600	25875599	249	235	1.28935e-07	1.40784	1.76703e-06	AT1G68830
chr1	20363400	20364199	178	168	6.19562e-06	1.40777	4.30537e-05	AT1G54520
chr5	4341400	4341799	89	84	0.000879051	1.40777	0.00255979	AT5G13510
chr3	6170400	6171399	196	185	2.32121e-06	1.40769	1.90664e-05	AT3G18035
chr1	10583200	10583799	107	101	0.000318773	1.40761	0.00110867	AT1G30110
chr1	6248800	6249399	125	118	0.000116767	1.4075	0.000482578	AT1G18160
chr1	4446400	4448199	518	489	7.25177e-14	1.40748	1.15858e-11	AT1G13030
chr1	4446400	4448199	518	489	7.25177e-14	1.40748	1.15858e-11	AT1G13040
chr4	15050800	15052199	304	287	6.7967e-09	1.40739	1.54727e-07	AT4G30930
chr4	15050800	15052199	304	287	6.7967e-09	1.40739	1.54727e-07	AT4G30935
chr4	17726800	17727599	161	152	1.60062e-05	1.40736	9.30972e-05	AT4G37740
chr3	19948600	19949399	179	169	5.97324e-06	1.4073	4.17538e-05	AT3G53850
chr1	17432600	17432999	90	85	0.000846551	1.40684	0.00247755	AT1G47500
chr3	6133400	6134199	162	153	1.54293e-05	1.40684	9.01262e-05	AT3G17910
chr3	10718400	10718799	108	102	0.000307091	1.40684	0.00107479	AT3G28590
chr4	9040800	9041399	126	119	0.000112517	1.40684	0.000467301	AT4G15950
chr4	13404000	13404399	90	85	0.000846551	1.40684	0.00247755	AT4G26550
chr5	4248400	4250199	523	494	6.06696e-14	1.40668	1.01501e-11	AT5G13270
chr5	4248400	4250199	523	494	6.06696e-14	1.40668	1.01501e-11	AT5G13280
chr5	23266800	23267999	307	290	6.10033e-09	1.40657	1.41416e-07	AT5G57410
chr3	5234800	5235999	217	205	7.82445e-07	1.40646	7.67472e-06	AT3G15500
chr1	13208600	13209199	163	154	1.48729e-05	1.40633	8.74525e-05	AT1G35680
chr5	23479800	23480399	145	137	4.00364e-05	1.40627	0.00019944	AT5G58003
chr1	4185400	4186199	254	240	1.07587e-07	1.40619	1.52758e-06	AT1G12300
chr1	9748600	9748999	91	86	0.000815223	1.40593	0.00239794	AT1G27980
chr2	18698600	18699199	164	155	1.43364e-05	1.40583	8.50305e-05	AT2G45360
chr2	6174000	6174799	146	138	3.85855e-05	1.40571	0.000193407	AT2G14510
chr4	14981800	14983399	219	207	7.27515e-07	1.40571	7.20768e-06	AT4G30750
chr4	14981800	14983399	219	207	7.27515e-07	1.40571	7.20768e-06	AT4G30760
chr4	15948400	15949199	183	173	5.15985e-06	1.40549	3.69717e-05	AT4G33060
chr4	12251800	12254199	550	520	1.6929e-14	1.40534	3.6171e-12	AT4G23490
chr5	1340400	1341399	165	156	1.38189e-05	1.40534	8.23193e-05	AT5G04670
chr5	23552200	23552799	110	104	0.000284973	1.40534	0.00100852	AT5G58210
chr1	8188400	8188999	147	139	3.71864e-05	1.40515	0.000187241	AT1G23090
chr3	22622000	22622399	92	87	0.000785029	1.40504	0.00232493	AT3G61130
chr4	8510800	8512199	258	244	9.30625e-08	1.40492	1.35945e-06	AT4G14830
chr4	8510800	8512199	258	244	9.30625e-08	1.40492	1.35945e-06	AT4G14840
chr2	16350000	16350599	166	157	1.33199e-05	1.40485	7.99509e-05	AT2G39190
chr3	3751600	3752399	166	157	1.33199e-05	1.40485	7.99509e-05	AT3G11880
chr4	16430600	16430999	111	105	0.000274507	1.40461	0.000978219	AT4G34350
chr5	25518600	25519199	111	105	0.000274507	1.40461	0.000978219	AT5G63770
chr5	18046000	18046799	130	123	9.69861e-05	1.4043	0.000411866	AT5G44730
chr4	6346400	6347199	223	211	6.2885e-07	1.40425	6.39818e-06	AT4G10180
chr3	19775200	19776199	205	194	1.67125e-06	1.40402	1.44435e-05	AT3G53340
chr5	2516200	2516999	168	159	1.23746e-05	1.40389	7.53351e-05	AT5G07880
chr3	8087400	8087799	75	71	0.00210949	1.40354	0.00526082	AT3G22845
chr1	18305600	18307199	489	463	5.22043e-13	1.4033	5.82258e-11	AT1G49450
chr3	5258600	5259199	132	125	9.00321e-05	1.40309	0.000386406	AT3G15534
chr1	18361800	18363199	417	395	2.41035e-11	1.40269	1.38334e-09	AT1G49610
chr1	10051400	10051799	76	72	0.00203022	1.4025	0.00509358	AT1G28600
chr1	25333600	25334599	247	234	1.90718e-07	1.4025	2.40897e-06	AT1G67590
chr1	30354400	30355999	361	342	4.6304e-10	1.4025	1.62928e-08	AT1G80770
chr3	9154800	9155399	114	108	0.000245323	1.4025	0.000890323	AT3G25140
chr3	17333000	17333599	152	144	3.09072e-05	1.4025	0.00016083	AT3G47060
chr4	15694400	15694999	114	108	0.000245323	1.4025	0.000890323	AT4G32530
chr5	2580600	2581199	133	126	8.67418e-05	1.4025	0.000374368	AT5G08060
chr5	14818800	14819199	76	72	0.00203022	1.4025	0.00509358	AT5G37380
chr1	19484200	19485199	248	235	1.83892e-07	1.40218	2.33774e-06	AT1G52320
chr5	21661400	21661999	191	181	3.84735e-06	1.40209	2.89473e-05	AT5G53400
chr1	7159400	7160199	153	145	2.97832e-05	1.40199	0.000155896	AT1G20650
chr1	29985200	29985999	153	145	2.97832e-05	1.40199	0.000155896	AT1G79690
chr5	13601600	13602399	153	145	2.97832e-05	1.40199	0.000155896	AT5G35400
chr4	15141200	15142399	287	272	2.36672e-08	1.40196	4.41339e-07	AT4G31140
chr5	26510200	26510999	268	254	6.47097e-08	1.40192	1.00136e-06	AT5G66360
chr5	17829800	17830999	249	236	1.77309e-07	1.40187	2.27196e-06	AT5G44260
chr2	10253600	10254599	307	291	8.36366e-09	1.40174	1.84709e-07	AT2G24120
chr1	25701800	25702399	154	146	2.86996e-05	1.40149	0.000151341	AT1G68500
chr4	12106800	12107199	77	73	0.00195386	1.40149	0.00493798	AT4G23100
chr4	12555400	12555999	135	128	8.05127e-05	1.40135	0.000352285	AT4G24190
chr2	15588400	15589199	193	183	3.57462e-06	1.40129	2.7289e-05	AT2G37090
chr1	7754200	7754999	174	165	9.91872e-06	1.40116	6.28883e-05	AT1G22020
chr1	27347400	27348399	155	147	2.76549e-05	1.40099	0.00014666	AT1G72640
chr1	27347400	27348399	155	147	2.76549e-05	1.40099	0.00014666	AT1G72645
chr2	2329000	2329599	97	92	0.000649737	1.40089	0.00199333	AT2G06000
chr2	14966600	14967199	97	92	0.000649737	1.40089	0.00199333	AT2G35630
chr5	3894800	3895399	97	92	0.000649737	1.40089	0.00199333	AT5G12060
chr5	8210600	8211199	97	92	0.000649737	1.40089	0.00199333	AT5G24205
chr2	6865800	6866799	272	258	5.59398e-08	1.40078	8.87332e-07	AT2G15760
chr1	29544200	29546999	545	517	3.76319e-14	1.40064	6.80983e-12	AT1G78540
chr1	29544200	29546999	545	517	3.76319e-14	1.40064	6.80983e-12	AT1G78550
chr1	29544200	29546999	545	517	3.76319e-14	1.40064	6.80983e-12	AT1G78560
chr1	3807000	3807999	234	222	4.20764e-07	1.4005	4.64912e-06	AT1G11320
chr1	19499200	19499599	78	74	0.00188031	1.4005	0.00477866	AT1G52360
chr1	20619600	20619999	78	74	0.00188031	1.4005	0.00477866	AT1G55270
chr2	9691600	9691999	78	74	0.00188031	1.4005	0.00477866	AT2G22780
chr5	5720400	5720999	117	111	0.000219197	1.4005	0.00081238	AT5G17360
chr1	8693000	8694199	371	352	3.22566e-10	1.4004	1.23551e-08	AT1G24530
chr2	16531600	16532399	137	130	7.47254e-05	1.40023	0.000331461	AT2G39660
chr3	1407600	1408999	216	205	1.11689e-06	1.39998	1.0268e-05	AT3G05040
chr3	1407600	1408999	216	205	1.11689e-06	1.39998	1.0268e-05	AT3G05050
chr4	1932000	1932999	335	318	2.21526e-09	1.39971	6.17696e-08	AT4G04020
chr4	575000	577399	552	524	2.9258e-14	1.39968	5.82991e-12	AT4G01400
chr4	6762600	6763999	355	337	7.85737e-10	1.39965	2.57565e-08	AT4G11080
chr3	7418000	7419199	237	225	3.77001e-07	1.39955	4.25843e-06	AT3G21160
chr5	26369200	26369599	99	94	0.00060228	1.39936	0.00187383	AT5G65925
chr5	20225000	20227399	337	320	2.06012e-09	1.39927	5.86424e-08	AT5G49770
chr5	9463600	9465399	456	433	4.33344e-12	1.39926	3.41552e-10	AT5G26900
chr1	30420000	30421599	377	358	2.59579e-10	1.3992	1.03914e-08	AT1G80970
chr3	20005800	20006399	160	152	2.29699e-05	1.39861	0.000125492	AT3G54020
chr5	20863000	20863399	100	95	0.000579847	1.39861	0.0018192	AT5G51340
chr2	17765400	17766199	281	267	4.02881e-08	1.39835	6.73076e-07	AT2G42650
chr4	14392200	14393399	281	267	4.02881e-08	1.39835	6.73076e-07	AT4G29190
chr2	11625200	11625999	201	191	2.66246e-06	1.39825	2.12685e-05	AT2G27200
chr2	15696000	15697599	463	440	3.36536e-12	1.39814	2.77588e-10	AT2G37400
chr1	26805800	26807199	262	249	1.10281e-07	1.39805	1.55586e-06	AT1G71060
chr1	26805800	26807199	262	249	1.10281e-07	1.39805	1.55586e-06	AT1G71070
chr4	12767200	12767999	242	230	3.13878e-07	1.39801	3.62391e-06	AT4G24770
chr3	18657400	18658199	222	211	8.95938e-07	1.39795	8.57914e-06	AT3G50330
chr1	19035800	19036399	122	116	0.000181617	1.39741	0.000694885	AT1G51350
chr3	3755600	3756399	122	116	0.000181617	1.39741	0.000694885	AT3G11890
chr4	7196400	7196999	122	116	0.000181617	1.39741	0.000694885	AT4G12005
chr1	27241800	27242799	326	310	4.19204e-09	1.39726	1.03974e-07	AT1G72360
chr5	7273200	7273799	102	97	0.000537424	1.39717	0.00171046	AT5G21990
chr1	6398600	6401199	694	660	2.82828e-17	1.39713	1.4752e-14	AT1G18590
chr1	6398600	6401199	694	660	2.82828e-17	1.39713	1.4752e-14	AT1G18600
chr5	22196400	22197199	184	175	6.85237e-06	1.39702	4.66308e-05	AT5G54640
chr4	1336400	1337399	246	234	2.71033e-07	1.39682	3.20006e-06	AT4G03030
chr5	26767800	26768599	226	215	7.73334e-07	1.39666	7.59795e-06	AT5G67070
chr4	15762200	15762999	185	176	6.60313e-06	1.39663	4.53173e-05	AT4G32670
chr2	16699400	16699999	103	98	0.000517375	1.39647	0.00165631	AT2G39990
chr5	6998000	6998599	103	98	0.000517375	1.39647	0.00165631	AT5G20680
chr5	4570600	4572999	330	314	3.62346e-09	1.39639	9.15362e-08	AT5G14170
chr5	4570600	4572999	330	314	3.62346e-09	1.39639	9.15362e-08	AT5G14180
chr5	6760200	6760999	165	157	1.90718e-05	1.39639	0.000107303	AT5G20010
chr3	2904800	2905799	186	177	6.36289e-06	1.39624	4.39577e-05	AT3G09440
chr4	6698600	6699199	124	118	0.000168434	1.39624	0.000654258	AT4G10920
chr4	21400	22199	207	197	2.13361e-06	1.39613	1.77975e-05	AT4G00060
chr1	28400600	28401199	145	138	5.54117e-05	1.39608	0.000259657	AT1G75630
chr4	15842400	15843399	311	296	9.87347e-09	1.39602	2.10959e-07	AT4G32830
chr3	5978800	5980399	477	454	2.02812e-12	1.396	1.80737e-10	AT3G17465
chr3	5978800	5980399	477	454	2.02812e-12	1.396	1.80737e-10	AT3G17470
chr3	1779600	1780199	166	158	1.83748e-05	1.39596	0.000103876	AT3G05940
chr2	163800	164799	229	218	6.92453e-07	1.39573	6.92024e-06	AT2G01340
chr2	17010000	17010799	229	218	6.92453e-07	1.39573	6.92024e-06	AT2G40760
chr1	638000	638799	250	238	2.34003e-07	1.39568	2.84136e-06	AT1G02870
chr1	30305200	30306399	250	238	2.34003e-07	1.39568	2.84136e-06	AT1G80620
chr3	20016800	20018199	375	357	3.8002e-10	1.39568	1.39529e-08	AT3G54050
chr5	4604800	4605599	125	119	0.000162203	1.39568	0.000632199	AT5G14270
chr5	2938400	2939399	313	298	9.1779e-09	1.39556	1.98489e-07	AT5G09440
chr3	19921600	19923999	501	477	6.26916e-13	1.39554	6.73801e-11	AT3G53760
chr3	19921600	19923999	501	477	6.26916e-13	1.39554	6.73801e-11	AT3G53770
chr1	24463400	24464599	188	179	5.90811e-06	1.39549	4.13474e-05	AT1G65780
chr3	16068200	16069599	293	279	2.59815e-08	1.39536	4.75496e-07	AT3G44430
chr1	20869800	20870199	84	80	0.00149277	1.39512	0.00394352	AT1G55830
chr4	10603800	10604599	211	201	1.84041e-06	1.39479	1.56762e-05	AT4G19440
chr5	21201000	21202599	380	362	3.16789e-10	1.39475	1.22129e-08	AT5G52190
chr5	21201000	21202599	380	362	3.16789e-10	1.39475	1.22129e-08	AT5G52200
chr5	21201000	21202599	380	362	3.16789e-10	1.39475	1.22129e-08	AT5G52180
chr5	25189800	25190399	127	121	0.000150416	1.39457	0.000593168	AT5G62710
chr5	21757400	21758599	233	222	5.9754e-07	1.39452	6.16809e-06	AT5G53550
chr3	3267800	3268599	212	202	1.7736e-06	1.39446	1.51947e-05	AT3G10490
chr1	27939000	27940199	276	263	6.60207e-08	1.39436	1.01633e-06	AT1G74310
chr2	8418600	8419999	255	243	1.9471e-07	1.3943	2.44979e-06	AT2G19440
chr3	21128600	21128999	85	81	0.00143632	1.3943	0.00381485	AT3G57090
chr5	172800	173599	255	243	1.9471e-07	1.3943	2.44979e-06	AT5G01410
chr3	20700400	20701199	298	284	2.16345e-08	1.39418	4.08589e-07	AT3G55760
chr1	27803800	27804599	213	203	1.70919e-06	1.39414	1.47354e-05	AT1G73950
chr3	5731600	5732199	128	122	0.000144845	1.39403	0.000576712	AT3G16830
chr3	2451600	2452399	235	224	5.55052e-07	1.39393	5.83479e-06	AT3G07670
chr3	10499400	10500999	342	326	2.33854e-09	1.39389	6.44971e-08	AT3G28170
chr1	10672000	10673599	407	388	8.7311e-11	1.39375	4.129e-09	AT1G30290
chr1	10672000	10673599	407	388	8.7311e-11	1.39375	4.129e-09	AT1G30300
chr1	8325800	8326799	150	143	4.5945e-05	1.39372	0.000222802	AT1G23450
chr5	7570200	7571199	322	307	6.60436e-09	1.3936	1.5093e-07	AT5G22750
chr3	5292400	5293199	129	123	0.000139478	1.3935	0.000559046	AT3G15610
chr3	9769800	9770599	258	246	1.7436e-07	1.3935	2.24391e-06	AT3G26600
chr3	20136400	20136799	86	82	0.00138198	1.3935	0.00369598	AT3G54380
chr4	11251800	11252599	129	123	0.000139478	1.3935	0.000559046	AT4G21070
chr5	21826600	21827199	172	164	1.46926e-05	1.3935	8.67086e-05	AT5G53770
chr2	9270200	9271799	452	431	9.24043e-12	1.39342	6.20719e-10	AT2G21690
chr2	9270200	9271799	452	431	9.24043e-12	1.39342	6.20719e-10	AT2G21700
chr2	9270200	9271799	452	431	9.24043e-12	1.39342	6.20719e-10	AT2G21710
chr3	18753600	18754599	194	185	4.72851e-06	1.39332	3.44376e-05	AT3G50530
chr1	10468000	10468799	259	247	1.68059e-07	1.39323	2.17862e-06	AT1G29900
chr3	7881600	7882199	108	103	0.000427695	1.39318	0.00141904	AT3G22290
chr5	24126000	24127799	432	412	2.59194e-11	1.39318	1.46387e-09	AT5G59900
chr5	24126000	24127799	432	412	2.59194e-11	1.39318	1.46387e-09	AT5G59910
chr1	29832200	29832999	238	227	4.96886e-07	1.39307	5.3115e-06	AT1G79280
chr1	9441200	9441999	260	248	1.61984e-07	1.39297	2.10912e-06	AT1G27180
chr1	27287400	27288399	195	186	4.55606e-06	1.39297	3.33597e-05	AT1G72480
chr5	18683400	18683999	130	124	0.000134308	1.39297	0.000542185	AT5G46070
chr2	10617200	10617799	174	166	1.36361e-05	1.39272	8.14489e-05	AT2G24960
chr3	4262400	4262999	109	104	0.000411699	1.39256	0.00137458	AT3G13225
chr5	21317200	21317799	109	104	0.000411699	1.39256	0.00137458	AT5G52530
chr1	20623600	20624599	219	209	1.36876e-06	1.39226	1.22039e-05	AT1G55280
chr1	7696600	7697399	176	168	1.2655e-05	1.39195	7.6739e-05	AT1G21910
chr1	18377400	18379799	440	420	1.93708e-11	1.39195	1.17243e-09	AT1G49650
chr1	18377400	18379799	440	420	1.93708e-11	1.39195	1.17243e-09	AT1G49660
chr1	22153800	22154599	176	168	1.2655e-05	1.39195	7.6739e-05	AT1G60080
chr2	15110600	15111399	198	189	4.07531e-06	1.39195	3.03918e-05	AT2G35980
chr4	9245400	9245799	88	84	0.00127932	1.39195	0.00347061	AT4G16360
chr1	4305000	4306399	309	295	1.44529e-08	1.39174	2.89614e-07	AT1G12640
chr1	4305000	4306399	309	295	1.44529e-08	1.39174	2.89614e-07	AT1G12650
chr5	21115400	21116199	155	148	3.80846e-05	1.39153	0.000191059	AT5G51980
chr5	22416600	22417199	133	127	0.000119912	1.39146	0.000493392	AT5G55260
chr2	5790400	5791199	222	212	1.22475e-06	1.39136	1.10843e-05	AT2G13840
chr3	20538200	20539199	222	212	1.22475e-06	1.39136	1.10843e-05	AT3G55400
chr2	7754200	7754999	267	255	1.25158e-07	1.39121	1.7246e-06	AT2G17830
chr5	22278000	22278399	89	85	0.00123085	1.39121	0.00337188	AT5G54840
chr3	3322600	3323199	134	128	0.000115462	1.39097	0.000477965	AT3G10630
chr3	20479200	20480199	201	192	3.64502e-06	1.39097	2.7719e-05	AT3G55250
chr5	6886800	6887599	268	256	1.20627e-07	1.39097	1.67387e-06	AT5G20370
chr4	9819400	9819999	112	107	0.000367181	1.39077	0.00124767	AT4G17616
chr4	13013400	13014199	224	214	1.13722e-06	1.39077	1.04064e-05	AT4G25450
chr5	2763800	2764599	269	257	1.1626e-07	1.39072	1.62599e-06	AT5G08540
chr5	7242200	7243799	426	407	4.36829e-11	1.39071	2.23894e-09	AT5G21930
chr5	7242200	7243799	426	407	4.36829e-11	1.39071	2.23894e-09	AT5G21920
chr5	22811600	22812599	157	150	3.53283e-05	1.39069	0.000179619	AT5G56325
chr5	413400	414199	202	193	3.51188e-06	1.39064	2.69026e-05	AT5G02100
chr4	18376400	18377399	225	215	1.09582e-06	1.39048	1.00952e-05	AT4G39530
chr5	7093800	7094399	135	129	0.000111176	1.39048	0.000462925	AT5G20910
chr1	12965000	12965999	203	194	3.38357e-06	1.39032	2.60775e-05	AT1G35330
chr3	532000	532599	181	173	1.04984e-05	1.39013	6.5834e-05	AT3G02530
chr4	18274200	18274999	159	152	3.27703e-05	1.38987	0.000169012	AT4G39260
chr5	9458600	9459199	159	152	3.27703e-05	1.38987	0.000169012	AT5G26880
chr1	4693200	4693999	182	174	1.01131e-05	1.38977	6.38355e-05	AT1G13690
chr3	16930400	16931199	182	174	1.01131e-05	1.38977	6.38355e-05	AT3G46100
chr1	18615800	18617199	388	371	3.20722e-10	1.38957	1.2311e-08	AT1G50250
chr1	21893200	21893799	137	131	0.000103072	1.38954	0.000434074	AT1G59610
chr2	2436000	2436799	137	131	0.000103072	1.38954	0.000434074	AT2G06210
chr5	24357000	24357799	137	131	0.000103072	1.38954	0.000434074	AT5G60590
chr1	24432400	24432999	160	153	3.15612e-05	1.38947	0.000163585	AT1G65690
chr2	1173200	1173799	160	153	3.15612e-05	1.38947	0.000163585	AT2G03840
chr5	20890200	20893199	825	789	1.37066e-19	1.38931	1.42984e-16	AT5G51440
chr5	20890200	20893199	825	789	1.37066e-19	1.38931	1.42984e-16	AT5G51450
chr5	20890200	20893199	825	789	1.37066e-19	1.38931	1.42984e-16	AT5G51430
chr2	8193600	8194399	161	154	3.03964e-05	1.38908	0.000158637	AT2G18910
chr4	12720400	12721199	207	198	2.91532e-06	1.38908	2.29168e-05	AT4G24650
chr5	17203800	17204799	230	220	9.10261e-07	1.38908	8.68347e-06	AT5G42910
chr4	11396200	11397599	392	375	2.7703e-10	1.38892	1.09418e-08	AT4G21390
chr1	4298800	4299599	300	287	2.73103e-08	1.38887	4.937e-07	AT1G12630
chr1	27841200	27843199	531	508	2.85277e-13	1.38884	3.46514e-11	AT1G74030
chr1	27841200	27843199	531	508	2.85277e-13	1.38884	3.46514e-11	AT1G74040
chr1	6154600	6155799	162	155	2.92744e-05	1.38869	0.0001538	AT1G17890
chr2	966600	967799	278	266	8.34007e-08	1.38862	1.23768e-06	AT2G03200
chr3	18855200	18856799	488	467	2.49043e-12	1.38843	2.15441e-10	AT3G50740
chr1	25422600	25423599	186	178	8.70758e-06	1.3884	5.66368e-05	AT1G67800
chr2	9555400	9556199	186	178	8.70758e-06	1.3884	5.66368e-05	AT2G22490
chr1	3252400	3254199	466	446	7.50397e-12	1.38827	5.2599e-10	AT1G09970
chr5	6762000	6763599	233	223	8.14306e-07	1.38827	7.94766e-06	AT5G20010
chr5	6762000	6763599	233	223	8.14306e-07	1.38827	7.94766e-06	AT5G20020
chr1	7081800	7083999	443	424	2.34768e-11	1.38822	1.35615e-09	AT1G20410
chr1	7081800	7083999	443	424	2.34768e-11	1.38822	1.35615e-09	AT1G20420
chr1	7081800	7083999	443	424	2.34768e-11	1.38822	1.35615e-09	AT1G20430
chr1	5122800	5123599	210	201	2.60699e-06	1.38818	2.08771e-05	AT1G14850
chr2	14693800	14694399	210	201	2.60699e-06	1.38818	2.08771e-05	AT2G34830
chr1	23881600	23882199	164	157	2.71525e-05	1.38792	0.000144558	AT1G64350
chr1	472400	473199	212	203	2.41969e-06	1.38759	1.97246e-05	AT1G02360
chr5	22029400	22030199	212	203	2.41969e-06	1.38759	1.97246e-05	AT5G54250
chr3	3695000	3696199	354	339	2.04213e-09	1.38747	5.8506e-08	AT3G11690
chr5	16121600	16123199	425	407	6.12384e-11	1.38745	3.03353e-09	AT5G40320
chr4	13727600	13728799	260	249	2.20223e-07	1.38738	2.70272e-06	AT4G27450
chr2	15147400	15148199	213	204	2.33113e-06	1.3873	1.91213e-05	AT2G36070
chr2	13461400	13462399	308	295	2.03343e-08	1.38724	3.87751e-07	AT2G31650
chr3	37600	38599	237	227	7.01854e-07	1.38722	6.98859e-06	AT3G01100
chr1	12002400	12002999	166	159	2.51836e-05	1.38718	0.000135499	AT1G33102
chr5	15306000	15306999	261	250	2.12212e-07	1.38715	2.62988e-06	AT5G38300
chr4	6617800	6619399	356	341	1.89738e-09	1.38713	5.51609e-08	AT4G10740
chr4	6617800	6619399	356	341	1.89738e-09	1.38713	5.51609e-08	AT4G10750
chr5	18755200	18755999	190	182	7.49654e-06	1.38709	5.01107e-05	AT5G46250
chr1	9336400	9337599	333	319	5.98008e-09	1.387	1.39724e-07	AT1G26930
chr3	2112800	2113399	119	114	0.000281026	1.38696	0.00099754	AT3G06670
chr3	20063400	20064199	119	114	0.000281026	1.38696	0.00099754	AT3G54190
chr1	11164000	11164999	286	274	6.2055e-08	1.38687	9.67032e-07	AT1G31240
chr3	19985000	19985799	215	206	2.16357e-06	1.38673	1.79924e-05	AT3G53965
chr3	19985000	19985799	215	206	2.16357e-06	1.38673	1.79924e-05	AT3G53970
chr5	1085800	1086799	215	206	2.16357e-06	1.38673	1.79924e-05	AT5G04020
chr3	18530400	18531599	239	229	6.51571e-07	1.3867	6.58402e-06	AT3G49980
chr5	1958200	1958999	144	138	7.90645e-05	1.38645	0.000346976	AT5G06400
chr5	19698400	19698999	120	115	0.000270483	1.38645	0.000968256	AT5G48580
chr5	19698400	19698999	120	115	0.000270483	1.38645	0.000968256	AT5G48590
chr5	3438200	3442399	962	922	2.93483e-22	1.38633	5.78292e-19	AT5G10900
chr5	3438200	3442399	962	922	2.93483e-22	1.38633	5.78292e-19	AT5G10920
chr5	3438200	3442399	962	922	2.93483e-22	1.38633	5.78292e-19	AT5G10910
chr5	22740600	22741199	145	139	7.61231e-05	1.38604	0.000336315	AT5G56180
chr2	1448200	1450399	533	511	3.57399e-13	1.38589	4.19743e-11	AT2G04230
chr2	1448200	1450399	533	511	3.57399e-13	1.38589	4.19743e-11	AT2G04235
chr1	6006800	6009199	535	513	3.32218e-13	1.38566	3.92771e-11	AT1G17480
chr1	6006800	6009199	535	513	3.32218e-13	1.38566	3.92771e-11	AT1G17490
chr1	29063400	29064599	292	280	4.97042e-08	1.38563	8.04246e-07	AT1G77330
chr2	12148600	12149199	146	140	7.32906e-05	1.38563	0.000326034	AT2G28400
chr5	5066200	5066799	146	140	7.32906e-05	1.38563	0.000326034	AT5G15570
chr4	11541800	11542999	268	257	1.63702e-07	1.38555	2.12837e-06	AT4G21710
chr4	11541800	11542999	268	257	1.63702e-07	1.38555	2.12837e-06	AT4G21720
chr4	16944000	16945999	390	374	4.02663e-10	1.38553	1.46029e-08	AT4G35760
chr4	16944000	16945999	390	374	4.02663e-10	1.38553	1.46029e-08	AT4G35770
chr1	4529000	4529999	317	304	1.4587e-08	1.3855	2.9164e-07	AT1G13250
chr3	9216000	9216599	122	117	0.000250562	1.38546	0.000906832	AT3G25410
chr5	2859200	2860199	245	235	5.21256e-07	1.38522	5.5353e-06	AT5G08790
chr5	26438000	26440599	442	424	3.28442e-11	1.38509	1.79218e-09	AT5G66140
chr5	26438000	26440599	442	424	3.28442e-11	1.38509	1.79218e-09	AT5G66150
chr3	6031200	6033599	569	546	7.1322e-14	1.38465	1.14984e-11	AT3G17640
chr3	6031200	6033599	569	546	7.1322e-14	1.38465	1.14984e-11	AT3G17630
chr5	7651200	7652599	297	285	4.13066e-08	1.38463	6.85891e-07	AT5G22880
chr5	7651200	7652599	297	285	4.13066e-08	1.38463	6.85891e-07	AT5G22875
chr5	14074200	14074799	124	119	0.000232103	1.38451	0.000851316	AT5G35930
chr4	11245600	11246599	249	239	4.49161e-07	1.38428	4.88376e-06	AT4G21065
chr4	12520200	12520999	299	287	3.83582e-08	1.38424	6.45392e-07	AT4G24110
chr4	18443600	18444799	399	383	2.89222e-10	1.38419	1.12975e-08	AT4G39760
chr1	4912600	4913199	175	168	1.79417e-05	1.38404	0.000101801	AT1G14360
chr1	5204600	5205599	175	168	1.79417e-05	1.38404	0.000101801	AT1G15125
chr1	18561800	18562399	125	120	0.000223387	1.38404	0.000824636	AT1G50120
chr4	6478600	6478999	75	72	0.00295884	1.38404	0.00697581	AT4G10480
chr4	12940000	12941799	250	240	4.32747e-07	1.38404	4.74604e-06	AT4G25280
chr4	12940000	12941799	250	240	4.32747e-07	1.38404	4.74604e-06	AT4G25290
chr1	18038600	18039399	201	193	4.96356e-06	1.38376	3.5833e-05	AT1G48760
chr5	3199000	3199999	201	193	4.96356e-06	1.38376	3.5833e-05	AT5G10190
chr5	3296600	3297399	151	145	6.06273e-05	1.38366	0.000278973	AT5G10470
chr2	16152400	16153599	353	339	2.86076e-09	1.38355	7.65199e-08	AT2G38620
chr5	18907800	18908399	101	97	0.000773638	1.38347	0.00229484	AT5G46600
chr5	26673000	26673399	101	97	0.000773638	1.38347	0.00229484	AT5G66810
chr1	19781400	19782199	253	243	3.87009e-07	1.38336	4.35483e-06	AT1G53080
chr3	1073600	1074199	152	146	5.83693e-05	1.38329	0.00027062	AT3G04090
chr3	21438200	21438599	76	73	0.0028444	1.38329	0.00674502	AT3G57890
chr4	4798000	4798399	76	73	0.0028444	1.38329	0.00674502	AT4G07950
chr2	5741800	5742399	127	122	0.000206922	1.38314	0.000774332	AT2G13790
chr4	8283000	8283399	127	122	0.000206922	1.38314	0.000774332	AT4G14370
chr5	23241400	23241999	127	122	0.000206922	1.38314	0.000774332	AT5G57360
chr5	4982600	4984399	407	391	2.15472e-10	1.38305	8.84534e-09	AT5G15340
chr3	3528800	3529799	229	220	1.28276e-06	1.38304	1.15533e-05	AT3G11270
chr5	18499000	18499799	204	196	4.43516e-06	1.38292	3.26091e-05	AT5G45610
chr1	7908800	7909599	230	221	1.2357e-06	1.38279	1.11749e-05	AT1G22403
chr1	29995000	29996199	307	295	2.85196e-08	1.38273	5.08819e-07	AT1G79710
chr3	21429800	21430199	77	74	0.00273438	1.38255	0.00652469	AT3G57870
chr4	10072000	10072799	154	148	5.41017e-05	1.38255	0.000255001	AT4G18197
chr5	1384600	1385199	154	148	5.41017e-05	1.38255	0.000255001	AT5G04780
chr5	20254600	20255799	257	247	3.33435e-07	1.38248	3.80511e-06	AT5G49840
chr5	20254600	20255799	257	247	3.33435e-07	1.38248	3.80511e-06	AT5G49830
chr1	30276200	30277799	386	371	6.28662e-10	1.3824	2.13168e-08	AT1G80520
chr2	18965400	18965799	103	99	0.000715943	1.38237	0.0021525	AT2G46170
chr5	544200	544799	103	99	0.000715943	1.38237	0.0021525	AT5G02470
chr4	148800	149999	335	322	7.49919e-09	1.38233	1.6813e-07	AT4G00340
chr1	23614400	23615399	232	223	1.14669e-06	1.38231	1.04633e-05	AT1G63680
chr2	10399800	10400599	232	223	1.14669e-06	1.38231	1.04633e-05	AT2G24490
chr4	10436800	10437399	129	124	0.000191667	1.38226	0.000727373	AT4G19040
chr4	13008800	13009599	181	174	1.43084e-05	1.38214	8.49496e-05	AT4G25440
chr3	9541400	9542999	363	349	1.97759e-09	1.38198	5.72113e-08	AT3G26110
chr3	9541400	9542999	363	349	1.97759e-09	1.38198	5.72113e-08	AT3G26115
chr2	7617200	7617799	104	100	0.000688725	1.38183	0.00208605	AT2G17520
chr3	2180400	2182399	442	425	4.41924e-11	1.38183	2.25852e-09	AT3G06920
chr3	2180400	2182399	442	425	4.41924e-11	1.38183	2.25852e-09	AT3G06910
chr5	6598000	6598799	156	150	5.01452e-05	1.38183	0.000240215	AT5G19550
chr5	22266000	22266799	183	176	1.32683e-05	1.38153	7.97628e-05	AT5G54810
chr4	13543000	13543599	157	151	4.82765e-05	1.38148	0.000232962	AT4G26970
chr5	26749000	26750999	576	554	7.41261e-14	1.38145	1.17371e-11	AT5G67010
chr5	26749000	26750999	576	554	7.41261e-14	1.38145	1.17371e-11	AT5G67020
chr1	18860800	18861799	237	228	9.51141e-07	1.38113	9.01044e-06	AT1G50880
chr3	5842000	5842999	264	254	2.56866e-07	1.38099	3.05723e-06	AT3G17120
chr3	17680800	17681799	212	204	3.28452e-06	1.38079	2.54357e-05	AT3G47910
chr5	3637200	3637799	106	102	0.000637346	1.38079	0.00196261	AT5G11400
chr4	9376800	9377399	133	128	0.000164438	1.38058	0.000639926	AT4G16660
chr1	1671400	1672799	240	231	8.50171e-07	1.38045	8.23876e-06	AT1G05600
chr1	1671400	1672799	240	231	8.50171e-07	1.38045	8.23876e-06	AT1G05590
chr4	12732600	12732999	80	77	0.00242913	1.38045	0.00592098	AT4G24680
chr5	877800	878199	80	77	0.00242913	1.38045	0.00592098	AT5G03500
chr1	25319800	25320199	107	103	0.000613109	1.38028	0.00190135	AT1G67560
chr2	2087400	2088199	214	206	3.04682e-06	1.38028	2.37923e-05	AT2G05632
chr2	14426200	14426799	107	103	0.000613109	1.38028	0.00190135	AT2G34160
chr3	7841800	7842799	241	232	8.18949e-07	1.38023	7.9798e-06	AT3G22220
chr3	23259600	23261199	375	361	1.26925e-09	1.38021	3.88753e-08	AT3G62910
chr3	23259600	23261199	375	361	1.26925e-09	1.38021	3.88753e-08	AT3G62920
chr1	24033000	24033599	134	129	0.000158257	1.38018	0.000619132	AT1G64670
chr1	29852400	29853399	295	284	6.00425e-08	1.38015	9.43967e-07	AT1G79350
chr5	26237000	26237799	188	181	1.09863e-05	1.38007	6.8266e-05	AT5G65640
chr1	19976600	19978799	539	519	5.17484e-13	1.37988	5.80827e-11	AT1G53520
chr1	19976600	19978799	539	519	5.17484e-13	1.37988	5.80827e-11	AT1G53530
chr1	7285000	7285599	108	104	0.000589792	1.37979	0.00184322	AT1G20920
chr1	20733000	20733999	216	208	2.82628e-06	1.37979	2.23506e-05	AT1G55535
chr2	12416800	12418399	216	208	2.82628e-06	1.37979	2.23506e-05	AT2G28910
chr2	12416800	12418399	216	208	2.82628e-06	1.37979	2.23506e-05	AT2G28920
chr5	25624200	25624799	108	104	0.000589792	1.37979	0.00184322	AT5G64030
chr1	28081800	28082599	271	261	1.97848e-07	1.37959	2.48135e-06	AT1G74740
chr4	10790800	10792199	354	341	3.71116e-09	1.37934	9.32866e-08	AT4G19900
chr1	27263200	27263599	82	79	0.00224477	1.37914	0.00554363	AT1G72420
chr2	239800	240399	164	158	3.70028e-05	1.37914	0.000186529	AT2G01530
chr1	29567200	29568199	219	211	2.52497e-06	1.37906	2.03953e-05	AT1G78600
chr5	17114400	17115199	219	211	2.52497e-06	1.37906	2.03953e-05	AT5G42680
chr5	5508800	5510399	356	343	3.44608e-09	1.37904	8.81859e-08	AT5G16760
chr5	5508800	5510399	356	343	3.44608e-09	1.37904	8.81859e-08	AT5G16750
chr3	219800	220599	165	159	3.56229e-05	1.37882	0.00018078	AT3G01560
chr3	5671000	5671799	220	212	2.43184e-06	1.37882	1.97781e-05	AT3G16650
chr3	14947600	14948199	220	212	2.43184e-06	1.37882	1.97781e-05	AT3G42860
chr5	17105200	17105999	165	159	3.56229e-05	1.37882	0.00018078	AT5G42660
chr2	19662400	19663599	276	266	1.64176e-07	1.37863	2.13296e-06	AT2G48070
chr2	19662400	19663599	276	266	1.64176e-07	1.37863	2.13296e-06	AT2G48060
chr5	1209200	1209799	138	133	0.000135765	1.37863	0.000546637	AT5G04320
chr5	10135600	10136399	138	133	0.000135765	1.37863	0.000546637	AT5G28150
chr2	18786600	18787799	249	240	6.07036e-07	1.37851	6.25518e-06	AT2G45590
chr2	19206800	19207399	166	160	3.42944e-05	1.37851	0.000175015	AT2G46740
chr5	13233400	13234199	166	160	3.42944e-05	1.37851	0.000175015	AT5G34930
chr5	22551800	22552399	166	160	3.42944e-05	1.37851	0.000175015	AT5G55700
chr2	16430400	16432399	499	481	4.04243e-12	1.37841	3.22921e-10	AT2G39350
chr3	19367000	19367799	222	214	2.25573e-06	1.37835	1.85888e-05	AT3G52210
chr5	7534000	7534799	139	134	0.00013066	1.37826	0.000530478	AT5G22650
chr5	7600800	7602399	363	350	2.65858e-09	1.37803	7.17614e-08	AT5G22790
chr1	11705400	11706199	140	135	0.000125747	1.37789	0.000513941	AT1G32430
chr1	30303400	30303999	140	135	0.000125747	1.37789	0.000513941	AT1G80610
chr2	13905600	13906199	112	108	0.00050505	1.37789	0.00162581	AT2G32790
chr4	11788600	11789199	140	135	0.000125747	1.37789	0.000513941	AT4G22300
chr5	10313800	10314799	168	162	3.17838e-05	1.37789	0.000164522	AT5G28340
chr2	9046800	9047599	225	217	2.01515e-06	1.37767	1.69368e-05	AT2G21090
chr2	15450800	15451399	141	136	0.000121017	1.37753	0.000497652	AT2G36835
chr5	25913000	25913799	141	136	0.000121017	1.37753	0.000497652	AT5G64816
chr1	429200	430799	452	436	4.10105e-11	1.37744	2.12035e-09	AT1G02220
chr2	8640800	8641399	113	109	0.000485839	1.37744	0.0015741	AT2G20010
chr2	19387000	19388599	339	327	8.69751e-09	1.37744	1.90422e-07	AT2G47230
chr4	16441200	16441999	113	109	0.000485839	1.37744	0.0015741	AT4G34390
chr1	27232400	27234199	311	300	3.31015e-08	1.3774	5.71034e-07	AT1G72330
chr1	27232400	27234199	311	300	3.31015e-08	1.3774	5.71034e-07	AT1G72320
chr2	9897600	9898999	368	355	2.2087e-09	1.37734	6.17808e-08	AT2G23250
chr2	8692000	8693399	284	274	1.2179e-07	1.37718	1.68737e-06	AT2G20130
chr2	8692000	8693399	284	274	1.2179e-07	1.37718	1.68737e-06	AT2G20140
chr1	7573000	7574599	341	329	8.07462e-09	1.37715	1.7933e-07	AT1G21600
chr1	7573000	7574599	341	329	8.07462e-09	1.37715	1.7933e-07	AT1G21610
chr5	14221000	14223799	341	329	8.07462e-09	1.37715	1.7933e-07	AT5G36150
chr1	27917200	27917999	199	192	7.25122e-06	1.37712	4.88019e-05	AT1G74240
chr3	15502000	15503599	429	414	1.2847e-10	1.37682	5.71001e-09	AT3G43580
chr1	3387800	3389599	458	442	3.2861e-11	1.37678	1.7876e-09	AT1G10320
chr1	3387800	3389599	458	442	3.2861e-11	1.37678	1.7876e-09	AT1G10330
chr1	28628000	28628799	115	111	0.000449579	1.37656	0.00147768	AT1G76310
chr5	4857200	4857799	115	111	0.000449579	1.37656	0.00147768	AT5G15010
chr1	28155400	28156199	259	250	4.17404e-07	1.37652	4.61774e-06	AT1G74960
chr1	22549600	22550399	173	167	2.62813e-05	1.37642	0.000140383	AT1G61170
chr5	4597200	4598399	232	224	1.54876e-06	1.37614	1.35902e-05	AT5G14240
chr5	4597200	4598399	232	224	1.54876e-06	1.37614	1.35902e-05	AT5G14250
chr5	5450600	5451399	203	196	6.23396e-06	1.37614	4.32524e-05	AT5G16620
chr2	11030000	11031799	349	337	5.99783e-09	1.376	1.39771e-07	AT2G25870
chr2	11030000	11031799	349	337	5.99783e-09	1.376	1.39771e-07	AT2G25850
chr3	18875800	18877399	233	225	1.49159e-06	1.37593	1.31536e-05	AT3G50780
chr4	13139000	13139599	146	141	9.99078e-05	1.3758	0.000422351	AT4G25840
chr2	6484400	6484999	117	113	0.000416025	1.37572	0.00138498	AT2G15010
chr1	5760600	5762199	410	396	3.47496e-10	1.37566	1.30011e-08	AT1G16830
chr4	13355200	13355799	205	198	5.78011e-06	1.37566	4.05637e-05	AT4G26430
chr4	1121400	1122799	293	283	8.70222e-08	1.37563	1.28071e-06	AT4G02550
chr4	1121400	1122799	293	283	8.70222e-08	1.37563	1.28071e-06	AT4G02555
chr5	1290200	1291199	176	170	2.34478e-05	1.37558	0.000127475	AT5G04520
chr1	7154800	7155799	147	142	9.61497e-05	1.37547	0.000409	AT1G20640
chr3	2047800	2048599	236	228	1.33241e-06	1.3753	1.19157e-05	AT3G06570
chr3	547000	547399	89	86	0.00170296	1.37503	0.00440238	AT3G02580
chr5	16846200	16846799	149	144	8.90522e-05	1.37482	0.000383081	AT5G42150
chr5	22261400	22261999	149	144	8.90522e-05	1.37482	0.000383081	AT5G54800
chr3	5527800	5528599	209	202	4.96902e-06	1.37473	3.58505e-05	AT3G16310
chr3	7078200	7078799	150	145	8.57023e-05	1.3745	0.000371147	AT3G20290
chr5	25966800	25967399	180	174	2.01388e-05	1.3745	0.000112168	AT5G65000
chr2	9112200	9113399	271	262	2.66222e-07	1.37432	3.15166e-06	AT2G21280
chr2	9112200	9113399	271	262	2.66222e-07	1.37432	3.15166e-06	AT2G21290
chr5	185600	187399	332	321	1.5137e-08	1.37421	3.00268e-07	AT5G01450
chr5	185600	187399	332	321	1.5137e-08	1.37421	3.00268e-07	AT5G01460
chr3	6062200	6063599	242	234	1.06315e-06	1.37411	9.84537e-06	AT3G17720
chr3	1001400	1002599	273	264	2.46992e-07	1.37398	2.96959e-06	AT3G03890
chr5	7185200	7186799	364	352	3.43351e-09	1.37398	8.81183e-08	AT5G21125
chr5	7185200	7186799	364	352	3.43351e-09	1.37398	8.81183e-08	AT5G21130
chr5	10347800	10348399	182	176	1.86637e-05	1.37398	0.00010524	AT5G28400
chr2	11500800	11501999	243	235	1.02389e-06	1.37391	9.54156e-06	AT2G26950
chr4	10781600	10782399	213	206	4.27164e-06	1.37383	3.15902e-05	AT4G19865
chr1	28728200	28730799	642	621	8.77229e-15	1.37361	1.99446e-12	AT1G76560
chr1	28728200	28730799	642	621	8.77229e-15	1.37361	1.99446e-12	AT1G76570
chr1	25941800	25942199	92	89	0.00151289	1.37347	0.00398952	AT1G69010
chr1	29537000	29537399	92	89	0.00151289	1.37347	0.00398952	AT1G78510
chr2	10734000	10734599	92	89	0.00151289	1.37347	0.00398952	AT2G25190
chr3	1791000	1792799	368	356	2.95875e-09	1.37347	7.84313e-08	AT3G05970
chr3	1791000	1792799	368	356	2.95875e-09	1.37347	7.84313e-08	AT3G05975
chr1	29687200	29688599	339	328	1.16599e-08	1.37324	2.42696e-07	AT1G78950
chr2	19145800	19146799	278	269	2.04769e-07	1.37314	2.55731e-06	AT2G46630
chr1	435400	436999	464	449	3.51802e-11	1.37307	1.87353e-09	AT1G02230
chr2	7642800	7644599	279	270	1.97233e-07	1.37297	2.47539e-06	AT2G17560
chr2	7642800	7644599	279	270	1.97233e-07	1.37297	2.47539e-06	AT2G17570
chr4	7970200	7970799	155	150	7.07509e-05	1.37297	0.000316762	AT4G13730
chr5	23321800	23322799	403	390	6.02504e-10	1.37297	2.05477e-08	AT5G57590
chr5	26766200	26766999	186	180	1.60295e-05	1.37297	9.31411e-05	AT5G67060
chr3	22473400	22474999	373	361	2.45645e-09	1.37285	6.73303e-08	AT3G60820
chr3	22473400	22474999	373	361	2.45645e-09	1.37285	6.73303e-08	AT3G60830
chr3	16036400	16036999	156	151	6.80895e-05	1.37268	0.00030733	AT3G44380
chr2	19015800	19016399	125	121	0.000305062	1.37261	0.00106874	AT2G46320
chr1	315200	316999	438	424	1.23073e-10	1.37255	5.52551e-09	AT1G01910
chr1	315200	316999	438	424	1.23073e-10	1.37255	5.52551e-09	AT1G01920
chr4	10554800	10555199	94	91	0.00139814	1.37249	0.00373385	AT4G19330
chr4	11307000	11308399	282	273	1.76246e-07	1.37249	2.26571e-06	AT4G21210
chr4	13145400	13146799	282	273	1.76246e-07	1.37249	2.26571e-06	AT4G25850
chr1	5933800	5934399	157	152	6.55282e-05	1.37239	0.000297777	AT1G17340
chr1	16468000	16468799	157	152	6.55282e-05	1.37239	0.000297777	AT1G43670
chr1	17310600	17311399	220	213	3.27827e-06	1.37235	2.54039e-05	AT1G47240
chr2	10143400	10144599	220	213	3.27827e-06	1.37235	2.54039e-05	AT2G23830
chr3	3369800	3370599	126	122	0.00029346	1.37225	0.00103279	AT3G10760
chr3	19849200	19850999	252	244	7.29694e-07	1.37225	7.21717e-06	AT3G53540
chr1	3797800	3800399	347	336	8.65211e-09	1.37218	1.89662e-07	AT1G11300
chr1	28418400	28419399	221	214	3.15661e-06	1.37214	2.45955e-05	AT1G75680
chr2	8205800	8206399	190	184	1.3767e-05	1.37201	8.2065e-05	AT2G18940
chr3	20310400	20310799	95	92	0.00134408	1.37201	0.00361041	AT3G54826
chr3	20359600	20360999	380	368	1.89305e-09	1.37201	5.51254e-08	AT3G54950
chr5	20466400	20467999	507	491	5.36994e-12	1.37198	3.96794e-10	AT5G50300
chr3	5959600	5960399	127	123	0.0002823	1.37189	0.00100066	AT3G17420
chr5	8371800	8372799	254	246	6.76775e-07	1.37189	6.79996e-06	AT5G24520
chr3	5028200	5029799	286	277	1.51694e-07	1.37185	2.00233e-06	AT3G14940
chr5	16743800	16745599	286	277	1.51694e-07	1.37185	2.00233e-06	AT5G41830
chr5	18351800	18352599	191	185	1.32531e-05	1.37178	7.97255e-05	AT5G45290
chr5	20167200	20169599	446	432	9.147e-11	1.37174	4.29135e-09	AT5G49665
chr3	6261600	6262599	256	248	6.27692e-07	1.37154	6.39006e-06	AT3G18270
chr4	15074600	15075199	128	124	0.000271565	1.37154	0.000970174	AT4G30972
chr4	15074600	15075199	128	124	0.000271565	1.37154	0.000970174	AT4G30975
chr5	5610800	5611399	128	124	0.000271565	1.37154	0.000970174	AT5G17060
chr5	21262600	21263199	160	155	5.84082e-05	1.37154	0.00027073	AT5G52380
chr5	23310400	23311199	128	124	0.000271565	1.37154	0.000970174	AT5G57565
chr5	1678400	1679999	354	343	6.66372e-09	1.37129	1.51895e-07	AT5G05610
chr5	1678400	1679999	354	343	6.66372e-09	1.37129	1.51895e-07	AT5G05620
chr3	22190800	22191399	161	156	5.62113e-05	1.37127	0.000262536	AT3G60090
chr4	7231800	7232399	129	125	0.00026124	1.3712	0.000940675	AT4G12070
chr1	20439400	20440199	194	188	1.18238e-05	1.37109	7.24793e-05	AT1G54780
chr5	23879400	23879999	97	94	0.00124218	1.37109	0.00338904	AT5G59160
chr2	15172000	15172999	162	157	5.4097e-05	1.371	0.00025508	AT2G36170
chr1	27979200	27980399	357	346	5.95808e-09	1.37092	1.39394e-07	AT1G74440
chr3	4653000	4653799	130	126	0.000251307	1.37086	0.000908969	AT3G14050
chr5	47800	49399	260	252	5.39941e-07	1.37086	5.7166e-06	AT5G01130
chr1	17378600	17380599	423	410	2.86562e-10	1.37081	1.12431e-08	AT1G47389
chr1	17378600	17380599	423	410	2.86562e-10	1.37081	1.12431e-08	AT1G47390
chr3	45000	45599	163	158	5.20623e-05	1.37073	0.000247129	AT3G01130
chr1	27619600	27620199	98	95	0.00119417	1.37064	0.00328484	AT1G73460
chr2	8009600	8010799	294	285	1.12367e-07	1.37064	1.57902e-06	AT2G18480
chr5	6466200	6466799	98	95	0.00119417	1.37064	0.00328484	AT5G19220
chr5	6466200	6466799	98	95	0.00119417	1.37064	0.00328484	AT5G19221
chr5	6884400	6884999	98	95	0.00119417	1.37064	0.00328484	AT5G20360
chr1	441800	442999	229	222	2.33254e-06	1.37058	1.9124e-05	AT1G02260
chr2	13719000	13719799	131	127	0.000241753	1.37053	0.000879434	AT2G32295
chr5	4038000	4038599	131	127	0.000241753	1.37053	0.000879434	AT5G12440
chr5	24721200	24721999	263	255	4.82272e-07	1.37037	5.18341e-06	AT5G61460
chr4	7308200	7309799	329	319	2.26528e-08	1.37033	4.25106e-07	AT4G12300
chr1	22026600	22027399	231	224	2.16261e-06	1.3702	1.79971e-05	AT1G59840
chr5	251600	252599	297	288	1.00406e-07	1.3702	1.4453e-06	AT5G01670
chr4	807400	810399	893	866	1.5557e-19	1.37011	1.45204e-16	AT4G01865
chr4	807400	810399	893	866	1.5557e-19	1.37011	1.45204e-16	AT4G01870
chr4	807400	810399	893	866	1.5557e-19	1.37011	1.45204e-16	AT4G01860
chr4	824800	827999	596	578	1.12819e-13	1.37006	1.66727e-11	AT4G01910
chr4	824800	827999	596	578	1.12819e-13	1.37006	1.66727e-11	AT4G01915
chr1	4484600	4485199	166	161	4.64062e-05	1.36995	0.000224916	AT1G13160
chr5	18898800	18899799	233	226	2.00506e-06	1.36984	1.6868e-05	AT5G46580
chr2	16873400	16873999	100	97	0.00110367	1.36978	0.00308179	AT2G40410
chr5	1866000	1866399	100	97	0.00110367	1.36978	0.00308179	AT5G06160
chr5	3931600	3932199	200	194	9.41095e-06	1.36978	6.03158e-05	AT5G12170
chr5	6126000	6126599	100	97	0.00110367	1.36978	0.00308179	AT5G18460
chr3	6766200	6767399	167	162	4.4661e-05	1.36969	0.000218097	AT3G19510
chr3	6766200	6767399	167	162	4.4661e-05	1.36969	0.000218097	AT3G19515
chr3	7436000	7436599	167	162	4.4661e-05	1.36969	0.000218097	AT3G21200
chr5	9813000	9813799	234	227	1.93064e-06	1.36966	1.63271e-05	AT5G27710
chr1	23701800	23703799	435	422	1.83434e-10	1.36961	7.78235e-09	AT1G63860
chr1	3992400	3993599	268	260	3.99514e-07	1.36957	4.46438e-06	AT1G11820
chr4	8632400	8633199	134	130	0.000215218	1.36957	0.000800645	AT4G15110
chr2	17776600	17778999	470	456	3.75351e-11	1.36948	1.96937e-09	AT2G42700
chr2	17776600	17778999	470	456	3.75351e-11	1.36948	1.96937e-09	AT2G42690
chr2	13676400	13676999	135	131	0.000207038	1.36925	0.000774357	AT2G32200
chr4	705200	705799	135	131	0.000207038	1.36925	0.000774357	AT4G01650
chr5	4586800	4587599	169	164	4.13651e-05	1.36919	0.00020485	AT5G14220
chr5	15974200	15975399	271	263	3.56839e-07	1.3691	4.05393e-06	AT5G39890
chr1	2032400	2033399	170	165	3.98097e-05	1.36895	0.000198589	AT1G06640
chr1	30241600	30242599	238	231	1.65959e-06	1.36895	1.43707e-05	AT1G80440
chr5	15773800	15774599	137	133	0.000191601	1.36864	0.00072728	AT5G39420
chr3	4085400	4085999	240	233	1.53868e-06	1.3686	1.35151e-05	AT3G12840
chr2	8441400	8442399	206	200	7.4906e-06	1.36854	5.00899e-05	AT2G19490
chr4	17297200	17297799	103	100	0.000980665	1.36854	0.00279825	AT4G36690
chr1	18715400	18716799	241	234	1.48157e-06	1.36843	1.30783e-05	AT1G50510
chr1	18715400	18716799	241	234	1.48157e-06	1.36843	1.30783e-05	AT1G50500
chr2	14849600	14850199	138	134	0.000184321	1.36835	0.000703712	AT2G35260
chr5	6945800	6946599	173	168	3.54858e-05	1.36823	0.000180265	AT5G20520
chr2	9350800	9351399	104	101	0.000942802	1.36815	0.00271071	AT2G21940
chr1	7264800	7265399	139	135	0.000177318	1.36805	0.000682707	AT1G20880
chr5	6782600	6783399	139	135	0.000177318	1.36805	0.000682707	AT5G20080
chr5	17357600	17358199	139	135	0.000177318	1.36805	0.000682707	AT5G43260
chr4	17570200	17573999	803	780	1.32002e-17	1.36786	7.55137e-15	AT4G37370
chr4	17570200	17573999	803	780	1.32002e-17	1.36786	7.55137e-15	AT4G37380
chr1	20852600	20853199	210	204	6.43346e-06	1.36776	4.4333e-05	AT1G55790
chr1	25725800	25727199	210	204	6.43346e-06	1.36776	4.4333e-05	AT1G68550
chr1	25725800	25727199	210	204	6.43346e-06	1.36776	4.4333e-05	AT1G68552
chr4	13928400	13930999	633	615	2.87291e-14	1.36757	5.85611e-12	AT4G28005
chr4	13928400	13930999	633	615	2.87291e-14	1.36757	5.85611e-12	AT4G28010
chr4	13928400	13930999	633	615	2.87291e-14	1.36757	5.85611e-12	AT4G28000
chr2	7549800	7550799	248	241	1.13696e-06	1.36728	1.04093e-05	AT2G17370
chr5	6770200	6771199	284	276	2.18711e-07	1.3672	2.69162e-06	AT5G20040
chr2	8550400	8551399	285	277	2.10629e-07	1.36706	2.61575e-06	AT2G19810
chr5	18716200	18716799	107	104	0.000837798	1.36701	0.00245619	AT5G46170
chr1	23294600	23295599	252	245	9.77346e-07	1.36665	9.19483e-06	AT1G62880
chr1	23294600	23295599	252	245	9.77346e-07	1.36665	9.19483e-06	AT1G62886
chr2	8840600	8842799	468	455	5.37566e-11	1.36665	2.69299e-09	AT2G20520
chr2	8840600	8842799	468	455	5.37566e-11	1.36665	2.69299e-09	AT2G20530
chr3	22944600	22945199	108	105	0.000805475	1.36665	0.0023736	AT3G61960
chr1	4247200	4248399	289	281	1.81176e-07	1.36651	2.30817e-06	AT1G12460
chr5	20980000	20980799	217	211	4.92983e-06	1.36647	3.56403e-05	AT5G51660
chr1	1069800	1070799	181	176	2.61175e-05	1.36643	0.000139761	AT1G04120
chr4	7590000	7591199	362	352	6.58955e-09	1.36643	1.50786e-07	AT4G12980
chr4	1394000	1395599	326	317	3.38183e-08	1.36641	5.80575e-07	AT4G03150
chr4	1394000	1395599	326	317	3.38183e-08	1.36641	5.80575e-07	AT4G03153
chr3	6808800	6809599	218	212	4.74589e-06	1.36629	3.45499e-05	AT3G19595
chr5	111600	112399	182	177	2.51359e-05	1.36622	0.000135325	AT5G01270
chr1	4952000	4952999	292	284	1.61822e-07	1.36611	2.11011e-06	AT1G14460
chr2	8527400	8527799	73	71	0.00443699	1.36611	0.00974676	AT2G19790
chr3	17187200	17187799	110	107	0.00074454	1.36594	0.00222172	AT3G46650
chr1	2006400	2008599	441	429	1.95124e-10	1.36585	8.18044e-09	AT1G06550
chr1	2006400	2008599	441	429	1.95124e-10	1.36585	8.18044e-09	AT1G06560
chr2	10175400	10176599	294	286	1.50082e-07	1.36585	1.99069e-06	AT2G23900
chr4	11202000	11202799	147	143	0.000130086	1.36585	0.00052942	AT4G20940
chr5	13584200	13584799	147	143	0.000130086	1.36585	0.00052942	AT5G35360
chr5	26926800	26928399	405	394	9.92943e-10	1.36578	3.12214e-08	AT5G67470
chr5	8113800	8114599	221	215	4.23425e-06	1.36576	3.13922e-05	AT5G24010
chr5	18967600	18968799	332	323	2.69995e-08	1.36571	4.8958e-07	AT5G46740
chr1	9611200	9611599	74	72	0.00426122	1.36559	0.0094096	AT1G27630
chr4	1247400	1247999	185	180	2.24074e-05	1.36559	0.000122987	AT4G02790
chr5	1279800	1280799	148	144	0.000125148	1.36559	0.000512203	AT5G04490
chr2	11247400	11249399	519	505	6.08124e-12	1.36552	4.43805e-10	AT2G26440
chr2	11745600	11747399	447	435	1.56022e-10	1.36534	6.71577e-09	AT2G27470
chr2	11745600	11747399	447	435	1.56022e-10	1.36534	6.71577e-09	AT2G27480
chr5	7981600	7982399	149	145	0.000120398	1.36534	0.000495276	AT5G23670
chr1	27100200	27100799	112	109	0.000688236	1.36525	0.00208564	AT1G71990
chr2	8865000	8865799	224	218	3.77782e-06	1.36525	2.85331e-05	AT2G20585
chr2	7697400	7697799	75	73	0.00409249	1.36509	0.00911245	AT2G17720
chr4	17315600	17316199	150	146	0.000115828	1.36509	0.000479258	AT4G36740
chr4	8002000	8003599	226	220	3.50122e-06	1.36492	2.68384e-05	AT4G13800
chr4	17966200	17967599	226	220	3.50122e-06	1.36492	2.68384e-05	AT4G38350
chr4	17966200	17967599	226	220	3.50122e-06	1.36492	2.68384e-05	AT4G38360
chr5	5867400	5869599	378	368	3.62056e-09	1.36479	9.15934e-08	AT5G17780
chr5	18324800	18326799	341	332	1.92602e-08	1.3647	3.69254e-07	AT5G45250
chr5	18324800	18326799	341	332	1.92602e-08	1.3647	3.69254e-07	AT5G45260
chr1	7704600	7705999	266	259	5.75612e-07	1.36459	5.98704e-06	AT1G21920
chr3	23168600	23168999	76	74	0.0039305	1.36459	0.00880706	AT3G62650
chr4	14458800	14459399	114	111	0.000636211	1.36459	0.00196082	AT4G29380
chr5	4366000	4366399	76	74	0.0039305	1.36459	0.00880706	AT5G13560
chr4	6780400	6781199	305	297	9.91831e-08	1.36447	1.43234e-06	AT4G11130
chr1	9285400	9286199	191	186	1.78077e-05	1.3644	0.000101251	AT1G26800
chr1	9501000	9502599	230	224	3.00735e-06	1.36427	2.35567e-05	AT1G27360
chr1	29627400	29627999	115	112	0.0006117	1.36427	0.00189748	AT1G78800
chr3	8622200	8623199	192	187	1.71389e-05	1.36421	9.81721e-05	AT3G23880
chr5	5338000	5338799	154	150	9.92245e-05	1.36411	0.000419963	AT5G16300
chr5	8251200	8253799	347	338	1.53767e-08	1.36406	3.04682e-07	AT5G24280
chr5	2429600	2430999	270	263	4.94821e-07	1.36405	5.29581e-06	AT5G07670
chr5	2429600	2430999	270	263	4.94821e-07	1.36405	5.29581e-06	AT5G07660
chr4	9214200	9214799	116	113	0.000588138	1.36396	0.00183968	AT4G16280
chr4	16504800	16505399	116	113	0.000588138	1.36396	0.00183968	AT4G34555
chr2	13045200	13046199	156	152	9.184e-05	1.36365	0.000392976	AT2G30620
chr2	19433800	19434399	117	114	0.000565489	1.36365	0.00178124	AT2G47350
chr3	19318600	19319999	273	266	4.41764e-07	1.36365	4.81811e-06	AT3G52090
chr3	19318600	19319999	273	266	4.41764e-07	1.36365	4.81811e-06	AT3G52100
chr5	8889800	8890799	156	152	9.184e-05	1.36365	0.000392976	AT5G25530
chr5	324600	325399	313	305	7.33867e-08	1.36353	1.11329e-06	AT5G01840
chr5	19165400	19166199	235	229	2.48686e-06	1.3635	2.01563e-05	AT5G47190
chr2	18408800	18409599	237	231	2.30486e-06	1.36319	1.89496e-05	AT2G44600
chr1	1991600	1993199	317	309	6.31264e-08	1.36308	9.79855e-07	AT1G06510
chr1	1991600	1993199	317	309	6.31264e-08	1.36308	9.79855e-07	AT1G06515
chr3	16466200	16467799	317	309	6.31264e-08	1.36308	9.79855e-07	AT3G45010
chr3	777800	778399	119	116	0.000522786	1.36305	0.00167077	AT3G03305
chr5	6732200	6733599	238	232	2.21891e-06	1.36305	1.83536e-05	AT5G19910
chr5	6732200	6733599	238	232	2.21891e-06	1.36305	1.83536e-05	AT5G19920
chr5	26912800	26914599	278	271	3.6568e-07	1.363	4.1464e-06	AT5G67440
chr4	13943000	13943599	159	155	8.17836e-05	1.36297	0.000356614	AT4G28050
chr5	23696400	23698399	517	504	8.67881e-12	1.36295	5.91962e-10	AT5G58630
chr5	23696400	23698399	517	504	8.67881e-12	1.36295	5.91962e-10	AT5G58640
chr5	1434200	1435599	281	274	3.26477e-07	1.36263	3.73773e-06	AT5G04895
chr5	1434200	1435599	281	274	3.26477e-07	1.36263	3.73773e-06	AT5G04900
chr4	11169200	11169799	161	157	7.57006e-05	1.36253	0.000334781	AT4G20850
chr3	6199400	6201199	443	432	2.40193e-10	1.36252	9.68086e-09	AT3G18090
chr3	6199400	6201199	443	432	2.40193e-10	1.36252	9.68086e-09	AT3G18100
chr1	13040000	13040599	121	118	0.000483324	1.36246	0.00156753	AT1G35460
chr2	9309200	9310199	284	277	2.91479e-07	1.36226	3.39624e-06	AT2G21840
chr1	10846600	10847399	203	198	1.12502e-05	1.36224	6.96131e-05	AT1G30610
chr2	8324600	8325399	163	159	7.00712e-05	1.36211	0.000314315	AT2G19180
chr3	10814000	10814999	163	159	7.00712e-05	1.36211	0.000314315	AT3G28790
chr1	2395400	2396599	328	320	4.17216e-08	1.3619	6.91487e-07	AT1G07725
chr1	2395400	2396599	328	320	4.17216e-08	1.3619	6.91487e-07	AT1G07728
chr1	26182400	26183199	246	240	1.63734e-06	1.3619	1.42546e-05	AT1G69600
chr2	18138400	18138799	82	80	0.00308585	1.3619	0.00721291	AT2G43790
chr3	5484400	5485199	206	201	1.00305e-05	1.36173	6.33932e-05	AT3G16180
chr5	21864400	21865999	331	323	3.72663e-08	1.36159	6.3001e-07	AT5G53850
chr5	21864400	21865999	331	323	3.72663e-08	1.36159	6.3001e-07	AT5G53860
chr4	12444200	12445999	373	364	5.79567e-09	1.36154	1.35953e-07	AT4G23950
chr4	12444200	12445999	373	364	5.79567e-09	1.36154	1.35953e-07	AT4G23960
chr4	12444200	12445999	373	364	5.79567e-09	1.36154	1.35953e-07	AT4G23970
chr1	2367600	2368399	249	243	1.461e-06	1.36149	1.29256e-05	AT1G07645
chr2	17439600	17440799	249	243	1.461e-06	1.36149	1.29256e-05	AT2G41810
chr1	21195600	21196399	208	203	9.2919e-06	1.36141	5.97255e-05	AT1G56570
chr3	21362200	21362999	125	122	0.000413154	1.36136	0.00137775	AT3G57660
chr1	28661200	28662599	292	285	2.15428e-07	1.36132	2.66045e-06	AT1G76400
chr1	28661200	28662599	292	285	2.15428e-07	1.36132	2.66045e-06	AT1G76405
chr1	23425400	23425999	167	163	6.00406e-05	1.36129	0.000276993	AT1G63170
chr5	14234200	14235199	251	245	1.35413e-06	1.36122	1.20856e-05	AT5G36160
chr1	3204400	3206399	378	369	4.80419e-09	1.36109	1.16709e-07	AT1G09860
chr1	3204400	3206399	378	369	4.80419e-09	1.36109	1.16709e-07	AT1G09870
chr1	7726000	7726599	126	123	0.000397273	1.36109	0.00133231	AT1G21960
chr1	20912400	20913199	210	205	8.60777e-06	1.36109	5.61214e-05	AT1G55920
chr3	5219200	5219999	126	123	0.000397273	1.36109	0.00133231	AT3G15470
chr3	23459400	23459799	126	123	0.000397273	1.36109	0.00133231	AT3G63540
chr4	2135600	2136399	168	164	5.77665e-05	1.36109	0.000268176	AT4G04370
chr4	13847400	13848399	211	206	8.28486e-06	1.36093	5.43759e-05	AT4G27780
chr2	18537200	18537999	169	165	5.55788e-05	1.36089	0.000260337	AT2G44940
chr2	6908600	6909599	170	166	5.34743e-05	1.3607	0.000252345	AT2G15860
chr5	9828200	9830799	468	457	9.44104e-11	1.36066	4.40599e-09	AT5G27750
chr5	9828200	9830799	468	457	9.44104e-11	1.36066	4.40599e-09	AT5G27760
chr4	17257800	17258799	341	333	2.55769e-08	1.3606	4.71498e-07	AT4G36580
chr1	91400	92199	171	167	5.14496e-05	1.36051	0.00024504	AT1G01220
chr3	5888600	5889199	171	167	5.14496e-05	1.36051	0.00024504	AT3G17230
chr3	1727400	1728199	214	209	7.38714e-06	1.36047	4.95288e-05	AT3G05800
chr1	3430200	3430599	86	84	0.00262713	1.36032	0.00631124	AT1G10430
chr1	11757000	11757999	172	168	4.95019e-05	1.36032	0.000237518	AT1G32510
chr3	19662200	19662799	129	126	0.000353219	1.36032	0.00120705	AT3G53030
chr4	4204400	4205199	129	126	0.000353219	1.36032	0.00120705	AT4G07410
chr4	16486800	16487399	173	169	4.76281e-05	1.36013	0.000230209	AT4G34490
chr4	12042800	12045599	868	848	2.75846e-18	1.36002	2.12689e-15	AT4G22980
chr4	12042800	12045599	868	848	2.75846e-18	1.36002	2.12689e-15	AT4G22970
chr5	23342200	23343199	174	170	4.58254e-05	1.35995	0.000222344	AT5G57630
chr1	11221600	11222599	218	213	6.33989e-06	1.35987	4.38757e-05	AT1G31350
chr2	12995000	12995799	218	213	6.33989e-06	1.35987	4.38757e-05	AT2G30490
chr4	14451800	14453999	349	341	1.89275e-08	1.35985	3.64057e-07	AT4G29360
chr3	2160000	2160599	132	129	0.000314075	1.35958	0.00109459	AT3G06850
chr5	625400	626399	132	129	0.000314075	1.35958	0.00109459	AT5G02760
chr5	16148400	16149199	176	172	4.24228e-05	1.35958	0.000209038	AT5G40370
chr3	4741800	4743999	530	518	7.06749e-12	1.35946	5.03353e-10	AT3G14240
chr4	2740000	2741999	442	432	3.29928e-10	1.35944	1.2502e-08	AT4G05390
chr4	2740000	2741999	442	432	3.29928e-10	1.35944	1.2502e-08	AT4G05400
chr5	26261600	26262999	354	346	1.56813e-08	1.3594	3.09335e-07	AT5G65683
chr1	11395000	11396999	532	520	6.55962e-12	1.35935	4.74809e-10	AT1G31790
chr1	11395000	11396999	532	520	6.55962e-12	1.35935	4.74809e-10	AT1G31800
chr5	2285000	2288599	889	869	1.26831e-18	1.35926	1.07105e-15	AT5G07280
chr3	405800	406999	178	174	3.92736e-05	1.35923	0.000196385	AT3G02190
chr3	405800	406999	178	174	3.92736e-05	1.35923	0.000196385	AT3G02200
chr3	7001800	7002399	178	174	3.92736e-05	1.35923	0.000196385	AT3G20050
chr5	2876000	2877199	267	261	7.37647e-07	1.35923	7.28365e-06	AT5G09250
chr5	2876000	2877199	267	261	7.37647e-07	1.35923	7.28365e-06	AT5G09260
chr4	10842000	10842799	223	218	5.23739e-06	1.35916	3.73537e-05	AT4G20010
chr5	23593000	23593799	223	218	5.23739e-06	1.35916	3.73537e-05	AT5G58370
chr1	1779400	1779999	134	131	0.000290432	1.35911	0.00102437	AT1G05890
chr1	18116800	18117599	225	220	4.85218e-06	1.35888	3.52081e-05	AT1G48970
chr3	17909000	17910599	270	264	6.58272e-07	1.35888	6.64039e-06	AT3G48360
chr5	22885200	22885599	90	88	0.00223726	1.35888	0.00552815	AT5G56520
chr5	14834200	14837399	721	705	1.92436e-15	1.35884	5.98713e-13	AT5G37400
chr5	14834200	14837399	721	705	1.92436e-15	1.35884	5.98713e-13	AT5G37410
chr1	18787200	18787799	136	133	0.000268578	1.35865	0.000962409	AT1G50710
chr1	9054000	9055399	363	355	1.11769e-08	1.35863	2.34847e-07	AT1G26170
chr1	9054000	9055399	363	355	1.11769e-08	1.35863	2.34847e-07	AT1G26180
chr2	1041600	1042199	137	134	0.000258279	1.35843	0.000931149	AT2G03450
chr2	19526800	19527399	138	135	0.000248377	1.35821	0.000899932	AT2G47600
chr3	6749600	6750799	230	225	4.00879e-06	1.35821	2.9946e-05	AT3G19470
chr3	18572800	18573399	138	135	0.000248377	1.35821	0.000899932	AT3G50080
chr1	5590000	5591999	507	496	2.19996e-11	1.35815	1.29615e-09	AT1G16340
chr1	5590000	5591999	507	496	2.19996e-11	1.35815	1.29615e-09	AT1G16350
chr1	4172000	4172799	185	181	2.9986e-05	1.35805	0.000156819	AT1G12270
chr3	18129600	18129999	93	91	0.00198369	1.35788	0.00500196	AT3G48890
chr1	1873000	1873799	233	228	3.57498e-06	1.35782	2.728e-05	AT1G06149
chr1	1873000	1873799	233	228	3.57498e-06	1.35782	2.728e-05	AT1G06150
chr4	13790400	13790999	140	137	0.000229703	1.35778	0.00084426	AT4G27620
chr4	18279000	18279799	187	183	2.77624e-05	1.35773	0.000147142	AT4G39270
chr1	4740000	4740999	235	230	3.31222e-06	1.35757	2.56278e-05	AT1G13830
chr5	7959400	7960199	141	138	0.000220902	1.35757	0.000817163	AT5G23610
chr3	8761400	8763199	424	415	8.55415e-10	1.3575	2.73332e-08	AT3G24220
chr5	20557600	20558599	330	323	5.12876e-08	1.35748	8.25349e-07	AT5G50480
chr5	20126800	20127399	95	93	0.00183098	1.35726	0.00467945	AT5G49580
chr1	9033000	9034199	239	234	2.84333e-06	1.35707	2.24404e-05	AT1G26130
chr5	23605400	23607199	527	516	1.04243e-11	1.35701	6.92374e-10	AT5G58400
chr2	7516800	7517399	96	94	0.00175914	1.35695	0.00452289	AT2G17290
chr2	14531800	14532599	192	188	2.29001e-05	1.35695	0.000125149	AT2G34470
chr2	18659400	18662199	576	564	1.27176e-12	1.35695	1.21911e-10	AT2G45245
chr2	18659400	18662199	576	564	1.27176e-12	1.35695	1.21911e-10	AT2G45250
chr2	7180400	7182399	577	565	1.22522e-12	1.3569	1.18733e-10	AT2G16570
chr3	23346000	23347199	385	377	4.88594e-09	1.35688	1.18209e-07	AT3G63200
chr1	22208200	22208799	145	142	0.00018896	1.35675	0.000718869	AT1G60220
chr4	12760200	12760799	145	142	0.00018896	1.35675	0.000718869	AT4G24750
chr1	30073600	30074399	242	237	2.53583e-06	1.35671	2.0469e-05	AT1G79950
chr2	16114000	16115399	582	570	1.01685e-12	1.35666	1.01308e-10	AT2G38490
chr1	7603400	7604199	243	238	2.44092e-06	1.3566	1.98247e-05	AT1G21650
chr1	7603400	7604199	243	238	2.44092e-06	1.3566	1.98247e-05	AT1G21651
chr4	8340600	8341799	243	238	2.44092e-06	1.3566	1.98247e-05	AT4G14520
chr4	8340600	8341799	243	238	2.44092e-06	1.3566	1.98247e-05	AT4G14510
chr5	20610200	20610799	146	143	0.000181727	1.35656	0.000694933	AT5G50650
chr5	1726200	1728199	439	430	4.87406e-10	1.35649	1.70823e-08	AT5G05740
chr5	1726200	1728199	439	430	4.87406e-10	1.35649	1.70823e-08	AT5G05750
chr4	260200	260999	196	192	1.96325e-05	1.35636	0.000109935	AT4G00620
chr4	13584400	13585199	245	240	2.26164e-06	1.35636	1.86289e-05	AT4G27060
chr5	1858400	1858799	98	96	0.00162389	1.35636	0.00422849	AT5G06140
chr1	8262200	8263399	246	241	2.17701e-06	1.35625	1.80745e-05	AT1G23280
chr1	8262200	8263399	246	241	2.17701e-06	1.35625	1.80745e-05	AT1G23290
chr5	17427200	17428199	395	387	3.3547e-09	1.35615	8.69769e-08	AT5G43400
chr3	8581800	8583999	346	339	2.80408e-08	1.35612	5.03316e-07	AT3G23800
chr1	1390800	1393199	396	388	3.23092e-09	1.35608	8.40133e-08	AT1G04910
chr1	1390800	1393199	396	388	3.23092e-09	1.35608	8.40133e-08	AT1G04920
chr1	20848000	20848599	99	97	0.00156026	1.35608	0.00408982	AT1G55760
chr4	15519400	15519799	99	97	0.00156026	1.35608	0.00408982	AT4G32120
chr1	4189200	4190399	348	341	2.60029e-08	1.35596	4.75398e-07	AT1G12320
chr1	22339000	22340199	249	244	1.94169e-06	1.35591	1.64127e-05	AT1G60640
chr1	22339000	22340199	249	244	1.94169e-06	1.35591	1.64127e-05	AT1G60650
chr5	26195800	26196399	150	147	0.000155475	1.3558	0.000609864	AT5G65540
chr3	22584000	22584999	302	296	1.95635e-07	1.35562	2.45881e-06	AT3G61028
chr4	1042400	1042999	151	148	0.000149531	1.35562	0.00059053	AT4G02370
chr5	449200	450399	151	148	0.000149531	1.35562	0.00059053	AT5G02230
chr5	474000	474399	101	99	0.00144045	1.35553	0.00382352	AT5G02310
chr1	5438800	5440999	354	347	2.07362e-08	1.35549	3.93301e-07	AT1G15790
chr5	26051000	26052199	255	250	1.54472e-06	1.35526	1.35614e-05	AT5G65205
chr2	12872200	12873599	359	352	1.71725e-08	1.35511	3.35025e-07	AT2G30140
chr3	20027400	20029599	513	503	2.31619e-11	1.3551	1.34673e-09	AT3G54085
chr3	20027400	20029599	513	503	2.31619e-11	1.3551	1.34673e-09	AT3G54090
chr1	1216000	1216599	103	101	0.00132993	1.35499	0.00357782	AT1G04480
chr1	24957400	24957999	103	101	0.00132993	1.35499	0.00357782	AT1G66890
chr4	18140600	18141799	206	202	1.33648e-05	1.35499	8.01258e-05	AT4G38900
chr5	21438200	21438599	103	101	0.00132993	1.35499	0.00357782	AT5G52882
chr2	18240800	18242199	207	203	1.2861e-05	1.35486	7.78152e-05	AT2G44090
chr2	18240800	18242199	207	203	1.2861e-05	1.35486	7.78152e-05	AT2G44100
chr3	10371800	10372399	156	153	0.000123063	1.35474	0.000504834	AT3G27930
chr4	10487800	10488399	104	102	0.00127792	1.35474	0.00346737	AT4G19180
chr4	12954400	12955199	208	204	1.23761e-05	1.35474	7.52927e-05	AT4G25320
chr1	27991200	27992399	263	258	1.13888e-06	1.35443	1.04081e-05	AT1G74470
chr5	23780800	23781799	263	258	1.13888e-06	1.35443	1.04081e-05	AT5G58890
chr4	165600	166399	159	156	0.000109498	1.35423	0.00045728	AT4G00370
chr4	15576000	15576599	159	156	0.000109498	1.35423	0.00045728	AT4G32270
chr3	4817400	4819399	319	313	1.0276e-07	1.35415	1.46845e-06	AT3G14415
chr3	4817400	4819399	319	313	1.0276e-07	1.35415	1.46845e-06	AT3G14410
chr4	10339000	10340399	374	367	9.75497e-09	1.35403	2.08679e-07	AT4G18840
chr1	27742000	27742799	214	210	9.82864e-06	1.35399	6.23841e-05	AT1G73770
chr3	17353600	17354999	321	315	9.52666e-08	1.35399	1.3848e-06	AT3G47130
chr5	5516000	5516599	107	105	0.00113391	1.35399	0.00314937	AT5G16770
chr5	4847200	4847999	215	211	9.45841e-06	1.35387	6.05325e-05	AT5G14970
chr5	25443400	25445399	645	633	9.71342e-14	1.35387	1.45981e-11	AT5G63550
chr5	25443400	25445399	645	633	9.71342e-14	1.35387	1.45981e-11	AT5G63540
chr1	362200	363199	378	371	8.38977e-09	1.35375	1.85055e-07	AT1G02060
chr2	1592000	1592799	162	159	9.74354e-05	1.35375	0.000413477	AT2G04560
chr4	8426000	8426599	108	106	0.00108964	1.35375	0.00305126	AT4G14710
chr5	8282600	8283799	324	318	8.504e-08	1.35375	1.2557e-06	AT5G24318
chr1	2579800	2581599	325	319	8.18815e-08	1.35367	1.22127e-06	AT1G08210
chr1	2579800	2581599	325	319	8.18815e-08	1.35367	1.22127e-06	AT1G08220
chr1	127600	128399	163	160	9.37188e-05	1.3536	0.00040005	AT1G01320
chr3	5074200	5074799	163	160	9.37188e-05	1.3536	0.00040005	AT3G15080
chr2	867400	870199	544	534	7.26676e-12	1.35356	5.15475e-10	AT2G02970
chr2	867400	870199	544	534	7.26676e-12	1.35356	5.15475e-10	AT2G02980
chr2	652600	653199	109	107	0.00104711	1.35352	0.00295106	AT2G02470
chr2	18328600	18329199	109	107	0.00104711	1.35352	0.00295106	AT2G44410
chr5	5250400	5251199	218	214	8.42953e-06	1.35352	5.51825e-05	AT5G16070
chr5	22148200	22149199	219	215	8.11214e-06	1.3534	5.33213e-05	AT5G54520
chr1	19913400	19913999	110	108	0.00100627	1.35329	0.00285568	AT1G53380
chr1	29220600	29221199	110	108	0.00100627	1.35329	0.00285568	AT1G77740
chr4	1022800	1023399	165	162	8.67075e-05	1.35329	0.000374311	AT4G02320
chr5	23546400	23546999	110	108	0.00100627	1.35329	0.00285568	AT5G58190
chr4	17813000	17814999	441	433	5.9561e-10	1.35323	2.03517e-08	AT4G37890
chr4	17813000	17814999	441	433	5.9561e-10	1.35323	2.03517e-08	AT4G37895
chr5	26496200	26497199	276	271	6.94272e-07	1.3532	6.92475e-06	AT5G66320
chr1	18470200	18470999	221	217	7.51286e-06	1.35317	5.01253e-05	AT1G49890
chr5	4486000	4487599	389	382	5.54288e-09	1.35303	1.30541e-07	AT5G13920
chr5	614800	616999	446	438	4.93641e-10	1.35295	1.72667e-08	AT5G02730
chr5	614800	616999	446	438	4.93641e-10	1.35295	1.72667e-08	AT5G02740
chr1	6924200	6924799	224	220	6.69613e-06	1.35284	4.58314e-05	AT1G19950
chr3	10216000	10216799	168	165	7.7166e-05	1.35284	0.000340244	AT3G27570
chr5	9038800	9041599	784	770	3.1977e-16	1.35284	1.23278e-13	AT5G25910
chr3	10782200	10782999	169	166	7.42259e-05	1.3527	0.000329575	AT3G28720
chr1	3845600	3847799	565	555	3.31443e-12	1.35262	2.74664e-10	AT1G11420
chr1	3845600	3847799	565	555	3.31443e-12	1.35262	2.74664e-10	AT1G11430
chr1	8877800	8878799	226	222	6.20172e-06	1.35262	4.30708e-05	AT1G25320
chr3	5251800	5252599	226	222	6.20172e-06	1.35262	4.30708e-05	AT3G15520
chr4	10359800	10360599	170	167	7.13984e-05	1.35255	0.000319098	AT4G18905
chr1	23911200	23911999	228	224	5.74391e-06	1.35241	4.03896e-05	AT1G64390
chr5	966200	967199	171	168	6.86791e-05	1.35241	0.000309126	AT5G03700
chr5	1399600	1400599	288	283	4.39833e-07	1.35216	4.80296e-06	AT5G04820
chr1	2484400	2485599	232	228	4.92742e-06	1.35199	3.56519e-05	AT1G08000
chr1	2484400	2485599	232	228	4.92742e-06	1.35199	3.56519e-05	AT1G08005
chr1	5609000	5609799	174	171	6.11296e-05	1.35199	0.000280993	AT1G16410
chr3	7952800	7954199	292	287	3.77784e-07	1.35183	4.26456e-06	AT3G22425
chr3	7952800	7954199	292	287	3.77784e-07	1.35183	4.26456e-06	AT3G22430
chr2	9072600	9073199	118	116	0.000732333	1.35159	0.00219212	AT2G21170
chr5	3929800	3930399	118	116	0.000732333	1.35159	0.00219212	AT5G12150
chr5	26185600	26186799	296	291	3.24501e-07	1.35151	3.72232e-06	AT5G65510
chr1	1469600	1470799	415	408	2.08206e-09	1.35148	5.88888e-08	AT1G05100
chr1	23086400	23087199	178	175	5.23437e-05	1.35146	0.000248066	AT1G62390
chr3	6605600	6606199	119	117	0.000703862	1.3514	0.00212428	AT3G19100
chr5	5525800	5527199	238	234	3.91553e-06	1.3514	2.93855e-05	AT5G16800
chr5	5525800	5527199	238	234	3.91553e-06	1.3514	2.93855e-05	AT5G16810
chr5	25798800	25801999	715	703	7.15509e-15	1.35136	1.7382e-12	AT5G64540
chr5	25798800	25801999	715	703	7.15509e-15	1.35136	1.7382e-12	AT5G64541
chr5	25798800	25801999	715	703	7.15509e-15	1.35136	1.7382e-12	AT5G64550
chr5	25798800	25801999	715	703	7.15509e-15	1.35136	1.7382e-12	AT5G64552
chr1	1772600	1773399	179	176	5.0353e-05	1.35133	0.000240982	AT1G05870
chr3	23159800	23160399	179	176	5.0353e-05	1.35133	0.000240982	AT3G62620
chr3	22409600	22412399	418	411	1.85973e-09	1.35131	5.42888e-08	AT3G60630
chr4	11917000	11918799	418	411	1.85973e-09	1.35131	5.42888e-08	AT4G22666
chr4	11917000	11918799	418	411	1.85973e-09	1.35131	5.42888e-08	AT4G22670
chr1	4443000	4444799	301	296	2.68353e-07	1.35113	3.17265e-06	AT1G13020
chr1	4443000	4444799	301	296	2.68353e-07	1.35113	3.17265e-06	AT1G13030
chr1	22682400	22684399	241	237	3.4906e-06	1.35111	2.67859e-05	AT1G61480
chr4	13784600	13784999	121	119	0.000650228	1.35101	0.00199363	AT4G27600
chr1	18511800	18512599	182	179	4.48256e-05	1.35095	0.0002186	AT1G49980
chr3	16739400	16740199	182	179	4.48256e-05	1.35095	0.0002186	AT3G45610
chr2	12655000	12656599	486	478	1.09987e-10	1.35092	5.02707e-09	AT2G29590
chr2	12655000	12656599	486	478	1.09987e-10	1.35092	5.02707e-09	AT2G29600
chr1	9951800	9952599	304	299	2.39449e-07	1.3509	2.89264e-06	AT1G28360
chr1	12520200	12520799	122	120	0.000624977	1.35083	0.00193291	AT1G34320
chr4	11182200	11182799	122	120	0.000624977	1.35083	0.00193291	AT4G20890
chr5	25483200	25483799	122	120	0.000624977	1.35083	0.00193291	AT5G63650
chr5	22108400	22109599	428	421	1.27644e-09	1.35078	3.89611e-08	AT5G54450
chr5	6498800	6499799	306	301	2.21934e-07	1.35075	2.72183e-06	AT5G19310
chr1	26942000	26942799	184	181	4.14835e-05	1.35071	0.000205236	AT1G71528
chr1	26942000	26942799	184	181	4.14835e-05	1.35071	0.000205236	AT1G71530
chr3	19501000	19501799	184	181	4.14835e-05	1.35071	0.000205236	AT3G52565
chr3	19501000	19501799	184	181	4.14835e-05	1.35071	0.000205236	AT3G52570
chr5	7730400	7730999	124	122	0.000577403	1.35046	0.00181313	AT5G23040
chr5	26089600	26090199	124	122	0.000577403	1.35046	0.00181313	AT5G65290
chr4	11960200	11960999	187	184	3.69335e-05	1.35035	0.000186232	AT4G22760
chr1	28059200	28060799	312	307	1.76717e-07	1.35032	2.26765e-06	AT1G74680
chr4	16977400	16977999	125	123	0.000555004	1.35029	0.00175413	AT4G35830
chr5	4954200	4954999	126	124	0.000533481	1.35011	0.00170066	AT5G15260
chr5	17208600	17209599	252	248	2.29137e-06	1.35011	1.88474e-05	AT5G42920
chr3	21945600	21946999	253	249	2.20539e-06	1.35003	1.82503e-05	AT3G59380
chr3	21945600	21946999	253	249	2.20539e-06	1.35003	1.82503e-05	AT3G59390
chr5	26861800	26862399	190	187	3.28845e-05	1.35	0.000169429	AT5G67330
chr1	22235000	22235599	127	125	0.0005128	1.34994	0.00164717	AT1G60320
chr1	12623400	12624399	255	251	2.04302e-06	1.34986	1.71264e-05	AT1G34520
chr5	3476800	3477599	255	251	2.04302e-06	1.34986	1.71264e-05	AT5G10990
chr1	23266400	23267199	257	253	1.89264e-06	1.34969	1.60516e-05	AT1G62830
chr4	9301400	9303399	387	381	7.86118e-09	1.34961	1.75138e-07	AT4G16500
chr4	9301400	9303399	387	381	7.86118e-09	1.34961	1.75138e-07	AT4G16510
chr5	26836200	26837399	258	254	1.82166e-06	1.34961	1.55388e-05	AT5G67260
chr3	4614000	4614799	194	191	2.81704e-05	1.34955	0.000148993	AT3G13970
chr3	3242800	3246199	841	828	5.02431e-17	1.34954	2.40814e-14	AT3G10430
chr3	3242800	3246199	841	828	5.02431e-17	1.34954	2.40814e-14	AT3G10439
chr3	3242800	3246199	841	828	5.02431e-17	1.34954	2.40814e-14	AT3G10440
chr3	19342000	19342599	130	128	0.000455482	1.34944	0.00149362	AT3G52150
chr3	4791400	4794399	717	706	8.69114e-15	1.34938	2.02801e-12	AT3G14360
chr3	4791400	4794399	717	706	8.69114e-15	1.34938	2.02801e-12	AT3G14362
chr5	20792000	20793199	261	257	1.62433e-06	1.34936	1.41482e-05	AT5G51160
chr2	17709600	17710199	131	129	0.000437849	1.34928	0.00144717	AT2G42530
chr3	4469200	4469799	131	129	0.000437849	1.34928	0.00144717	AT3G13670
chr3	6087000	6087799	197	194	2.50856e-05	1.34923	0.000135177	AT3G17780
chr2	7965600	7966399	264	260	1.44842e-06	1.34912	1.28367e-05	AT2G18330
chr1	229000	229999	266	262	1.34189e-06	1.34897	1.19884e-05	AT1G01630
chr3	22293600	22295399	333	328	7.96631e-08	1.34894	1.19018e-06	AT3G60320
chr1	17342200	17343599	200	197	2.23398e-05	1.34892	0.000122692	AT1G47310
chr1	28213800	28214399	134	132	0.000388971	1.34881	0.00131091	AT1G75170
chr5	25775000	25776599	268	264	1.24321e-06	1.34881	1.12313e-05	AT5G64460
chr5	25775000	25776599	268	264	1.24321e-06	1.34881	1.12313e-05	AT5G64470
chr5	4615200	4615999	135	133	0.000373932	1.34866	0.00126842	AT5G14310
chr1	9528200	9528799	136	134	0.00035948	1.34851	0.0012249	AT1G27435
chr1	29511800	29513199	408	402	3.55948e-09	1.34851	9.06952e-08	AT1G78440
chr2	8436000	8436599	136	134	0.00035948	1.34851	0.0012249	AT2G19470
chr2	17782200	17782999	272	268	1.06713e-06	1.34851	9.87197e-06	AT2G42710
chr4	12285600	12286799	342	337	5.66363e-08	1.3484	8.94379e-07	AT4G23540
chr3	3285800	3286599	206	203	1.77199e-05	1.34832	0.00010093	AT3G10530
chr4	9120800	9121599	206	203	1.77199e-05	1.34832	0.00010093	AT4G16130
chr1	2631000	2631999	413	407	2.94781e-09	1.34827	7.82582e-08	AT1G08340
chr1	9514200	9515599	207	204	1.70491e-05	1.34822	9.77367e-05	AT1G27390
chr1	9514200	9515599	207	204	1.70491e-05	1.34822	9.77367e-05	AT1G27400
chr1	25265000	25265799	207	204	1.70491e-05	1.34822	9.77367e-05	AT1G67440
chr5	5673000	5673799	209	206	1.57829e-05	1.34803	9.19799e-05	AT5G17250
chr5	8642800	8644199	282	278	7.28632e-07	1.3478	7.21472e-06	AT5G25070
chr5	8642800	8644199	282	278	7.28632e-07	1.3478	7.21472e-06	AT5G25080
chr4	8634600	8635399	213	210	1.35267e-05	1.34766	8.09594e-05	AT4G15120
chr4	13106000	13106999	284	280	6.75124e-07	1.34766	6.79492e-06	AT4G25730
chr1	797800	799799	501	494	8.2085e-11	1.34751	3.93431e-09	AT1G03260
chr1	797800	799799	501	494	8.2085e-11	1.34751	3.93431e-09	AT1G03270
chr1	29926000	29927399	362	357	2.65529e-08	1.34729	4.83956e-07	AT1G79550
chr1	29926000	29927399	362	357	2.65529e-08	1.34729	4.83956e-07	AT1G79560
chr3	17309400	17309999	147	145	0.000233198	1.34701	0.000854979	AT3G46980
chr5	7315200	7316599	443	437	9.51703e-10	1.34693	3.00311e-08	AT5G22090
chr1	9485200	9485799	148	146	0.000224218	1.34688	0.000827185	AT1G27310
chr1	22477200	22478399	224	221	8.85434e-06	1.34672	5.74124e-05	AT1G61010
chr1	22477200	22478399	224	221	8.85434e-06	1.34672	5.74124e-05	AT1G61020
chr1	22477200	22478399	224	221	8.85434e-06	1.34672	5.74124e-05	AT1G61030
chr1	10738800	10739599	150	148	0.000207288	1.34664	0.000775048	AT1G30410
chr3	5524400	5526199	525	518	3.33407e-11	1.34664	1.79716e-09	AT3G16300
chr3	5524400	5526199	525	518	3.33407e-11	1.34664	1.79716e-09	AT3G16290
chr1	19759000	19759599	151	149	0.000199313	1.34652	0.000750846	AT1G53025
chr3	19409600	19410599	151	149	0.000199313	1.34652	0.000750846	AT3G52350
chr2	769200	769999	228	225	7.59111e-06	1.3464	5.05523e-05	AT2G02740
chr1	26797400	26798999	457	451	5.61759e-10	1.34636	1.93442e-08	AT1G71040
chr5	24325800	24326799	306	302	2.91994e-07	1.34628	3.40001e-06	AT5G60490
chr3	16271800	16272999	307	303	2.81088e-07	1.34622	3.30121e-06	AT3G44720
chr2	10344200	10346799	694	685	3.49829e-14	1.34614	6.53038e-12	AT2G24310
chr2	10344200	10346799	694	685	3.49829e-14	1.34614	6.53038e-12	AT2G24320
chr5	19983200	19983999	155	153	0.000170381	1.34605	0.000660303	AT5G49290
chr3	1776000	1776799	233	230	6.26314e-06	1.34601	4.34039e-05	AT3G05937
chr1	27598000	27598599	156	154	0.000163835	1.34594	0.000637719	AT1G73400
chr2	15637200	15642399	1015	1002	7.79242e-20	1.34592	8.63693e-17	AT2G37230
chr2	15637200	15642399	1015	1002	7.79242e-20	1.34592	8.63693e-17	AT2G37240
chr2	15637200	15642399	1015	1002	7.79242e-20	1.34592	8.63693e-17	AT2G37250
chr1	2701200	2701799	157	155	0.000157541	1.34583	0.000616946	AT1G08530
chr3	4351400	4353399	471	465	3.31672e-10	1.34583	1.25146e-08	AT3G13390
chr3	7560600	7561399	157	155	0.000157541	1.34583	0.000616946	AT3G21465
chr2	15117200	15118599	315	311	2.07321e-07	1.34577	2.5819e-06	AT2G36000
chr3	19654000	19654599	158	156	0.000151491	1.34572	0.000597077	AT3G53000
chr5	6459000	6459799	237	234	5.37059e-06	1.34572	3.81579e-05	AT5G19200
chr5	10017000	10017999	158	156	0.000151491	1.34572	0.000597077	AT5G27990
chr1	6325800	6326599	238	235	5.16815e-06	1.34564	3.70087e-05	AT1G18382
chr1	6325800	6326599	238	235	5.16815e-06	1.34564	3.70087e-05	AT1G18390
chr1	29908600	29909399	238	235	5.16815e-06	1.34564	3.70087e-05	AT1G79500
chr1	29908600	29909399	238	235	5.16815e-06	1.34564	3.70087e-05	AT1G79510
chr3	22887800	22888799	159	157	0.000145675	1.34561	0.000579498	AT3G61830
chr4	11172800	11173999	239	236	4.97336e-06	1.34557	3.58527e-05	AT4G20860
chr1	23470800	23471199	80	79	0.00454755	1.3455	0.00996248	AT1G63270
chr2	12776600	12777399	160	158	0.000140084	1.3455	0.000561031	AT2G29970
chr5	4693200	4694199	320	316	1.71419e-07	1.3455	2.21248e-06	AT5G14550
chr5	4693200	4694199	320	316	1.71419e-07	1.3455	2.21248e-06	AT5G14560
chr1	27878800	27879599	161	159	0.000134708	1.3454	0.000543554	AT1G74140
chr2	13755800	13756799	243	240	4.26512e-06	1.34529	3.15683e-05	AT2G32400
chr5	3950000	3950799	162	160	0.000129541	1.34529	0.000527745	AT5G12220
chr4	16290000	16290999	246	243	3.80115e-06	1.34509	2.86849e-05	AT4G33990
chr1	8082200	8083999	329	325	1.21754e-07	1.34504	1.68819e-06	AT1G22850
chr1	8082200	8083999	329	325	1.21754e-07	1.34504	1.68819e-06	AT1G22860
chr3	21666000	21666999	247	244	3.65802e-06	1.34502	2.77941e-05	AT3G58590
chr3	6004800	6007999	579	572	4.39961e-12	1.34494	3.43712e-10	AT3G17550
chr3	6004800	6007999	579	572	4.39961e-12	1.34494	3.43712e-10	AT3G17560
chr5	18513400	18515799	497	491	1.24737e-10	1.34492	5.572e-09	AT5G45650
chr4	8988000	8988399	83	82	0.00402204	1.34489	0.00898323	AT4G15802
chr4	12366400	12367599	166	164	0.000110789	1.34489	0.000461799	AT4G23740
chr5	24744800	24745799	166	164	0.000110789	1.34489	0.000461799	AT5G61540
chr5	25136800	25137799	250	247	3.26028e-06	1.34482	2.53032e-05	AT5G62620
chr1	27032400	27032999	168	166	0.000102463	1.34469	0.000431814	AT1G71870
chr3	22158200	22159999	252	249	3.01951e-06	1.34469	2.36102e-05	AT3G59990
chr4	15722800	15724199	169	167	9.85389e-05	1.3446	0.000417261	AT4G32590
chr4	15722800	15724199	169	167	9.85389e-05	1.3446	0.000417261	AT4G32600
chr4	12916800	12918999	677	669	8.61059e-14	1.34457	1.32783e-11	AT4G25200
chr4	12916800	12918999	677	669	8.61059e-14	1.34457	1.32783e-11	AT4G25210
chr3	4480600	4481799	254	251	2.79657e-06	1.34456	2.21701e-05	AT3G13682
chr4	7297600	7298999	341	337	7.71845e-08	1.34445	1.15999e-06	AT4G12270
chr1	6345000	6346599	427	422	2.27627e-09	1.34443	6.32717e-08	AT1G18415
chr1	6345000	6346599	427	422	2.27627e-09	1.34443	6.32717e-08	AT1G18420
chr1	6345000	6346599	427	422	2.27627e-09	1.34443	6.32717e-08	AT1G18430
chr1	6345000	6346599	427	422	2.27627e-09	1.34443	6.32717e-08	AT1G18440
chr1	12983800	12984599	171	169	9.11388e-05	1.34441	0.000390447	AT1G35350
chr1	18136600	18138799	342	338	7.4309e-08	1.34441	1.12344e-06	AT1G49032
chr1	18136600	18138799	342	338	7.4309e-08	1.34441	1.12344e-06	AT1G49030
chr5	4243000	4243799	171	169	9.11388e-05	1.34441	0.000390447	AT5G13260
chr1	25598600	25599999	257	254	2.49273e-06	1.34438	2.01947e-05	AT1G68300
chr1	25598600	25599999	257	254	2.49273e-06	1.34438	2.01947e-05	AT1G68310
chr4	5256400	5256799	86	85	0.00355829	1.34431	0.00812081	AT4G08330
chr4	7542200	7542599	86	85	0.00355829	1.34431	0.00812081	AT4G12870
chr1	12455800	12456599	173	171	8.42977e-05	1.34422	0.000366002	AT1G34200
chr5	9689800	9690799	173	171	8.42977e-05	1.34422	0.000366002	AT5G27440
chr5	9689800	9690799	173	171	8.42977e-05	1.34422	0.000366002	AT5G27450
chr3	18422600	18423399	175	173	7.79731e-05	1.34404	0.00034295	AT3G49680
chr4	14017200	14017999	263	260	1.98074e-06	1.34401	1.67109e-05	AT4G28310
chr4	11785000	11785799	176	174	7.4992e-05	1.34396	0.000332228	AT4G22290
chr4	17045200	17046999	443	438	1.24477e-09	1.34385	3.83242e-08	AT4G36030
chr4	17045200	17046999	443	438	1.24477e-09	1.34385	3.83242e-08	AT4G36032
chr5	26345200	26347199	532	526	3.3481e-11	1.34384	1.79925e-09	AT5G65850
chr5	26345200	26347199	532	526	3.3481e-11	1.34384	1.79925e-09	AT5G65840
chr1	21536000	21536799	178	176	6.93694e-05	1.34378	0.000311837	AT1G58170
chr3	6002800	6003599	179	177	6.67191e-05	1.3437	0.00030253	AT3G17540
chr3	5926200	5926999	180	178	6.41706e-05	1.34361	0.000292395	AT3G17340
chr5	17293000	17294199	360	356	3.75342e-08	1.34361	6.33935e-07	AT5G43080
chr1	10585800	10586599	182	180	5.93635e-05	1.34345	0.000274261	AT1G30120
chr1	12069600	12070399	182	180	5.93635e-05	1.34345	0.000274261	AT1G33270
chr3	5103400	5105199	364	360	3.22522e-08	1.34345	5.58556e-07	AT3G15150
chr3	5103400	5105199	364	360	3.22522e-08	1.34345	5.58556e-07	AT3G15160
chr5	9406600	9407399	182	180	5.93635e-05	1.34345	0.000274261	AT5G26760
chr5	2712400	2713999	366	362	2.98973e-08	1.34336	5.26513e-07	AT5G08415
chr5	2712400	2713999	366	362	2.98973e-08	1.34336	5.26513e-07	AT5G08420
chr2	17618200	17619599	458	453	7.0712e-10	1.34335	2.3616e-08	AT2G42290
chr1	2770400	2772399	463	458	5.8568e-10	1.34319	2.00511e-08	AT1G08700
chr1	2770400	2772399	463	458	5.8568e-10	1.34319	2.00511e-08	AT1G08710
chr1	12589600	12590199	186	184	5.0808e-05	1.34313	0.000242473	AT1G34430
chr4	16137000	16137799	186	184	5.0808e-05	1.34313	0.000242473	AT4G33565
chr3	5013600	5015999	652	645	2.85782e-13	1.3431	3.44766e-11	AT3G14910
chr3	5013600	5015999	652	645	2.85782e-13	1.3431	3.44766e-11	AT3G14900
chr5	15751000	15751799	187	185	4.88702e-05	1.34305	0.000235315	AT5G39350
chr1	7949400	7950399	283	280	9.2145e-07	1.34292	8.77134e-06	AT1G22500
chr5	25042000	25045199	569	563	8.34781e-12	1.34284	5.71583e-10	AT5G62370
chr3	5711000	5711799	190	188	4.34914e-05	1.34282	0.000213591	AT3G16785
chr4	2466600	2467199	95	94	0.00246795	1.34282	0.00599297	AT4G04880
chr2	8659000	8659799	191	189	4.1834e-05	1.34274	0.000206538	AT2G20060
chr5	15931000	15931999	192	190	4.02402e-05	1.34267	0.000200286	AT5G39785
chr1	3913600	3914399	193	191	3.87074e-05	1.3426	0.000193799	AT1G11630
chr1	9899400	9900199	290	287	7.05197e-07	1.34257	7.01007e-06	AT1G28300
chr1	3412400	3412799	97	96	0.00227593	1.34252	0.00560691	AT1G10390
chr1	30237000	30237599	97	96	0.00227593	1.34252	0.00560691	AT1G80420
chr5	2966800	2968399	393	389	1.07519e-08	1.34235	2.27535e-07	AT5G09560
chr5	1682400	1683399	197	195	3.31408e-05	1.34231	0.000170403	AT5G05630
chr2	17206600	17207399	296	293	5.60799e-07	1.34229	5.87084e-06	AT2G41260
chr3	5133600	5133999	99	98	0.00209907	1.34224	0.00523632	AT3G15240
chr2	19567600	19570799	905	896	1.33637e-17	1.34203	7.40597e-15	AT2G47760
chr2	19567600	19570799	905	896	1.33637e-17	1.34203	7.40597e-15	AT2G47770
chr2	19567600	19570799	905	896	1.33637e-17	1.34203	7.40597e-15	AT2G47780
chr2	8684000	8686399	503	498	1.29881e-10	1.34202	5.75828e-09	AT2G20110
chr1	29137800	29138999	202	200	2.72992e-05	1.34197	0.000145252	AT1G77540
chr1	29137800	29138999	202	200	2.72992e-05	1.34197	0.000145252	AT1G77550
chr4	17860200	17862599	711	704	3.14478e-14	1.34189	6.12851e-12	AT4G38010
chr4	17860200	17862599	711	704	3.14478e-14	1.34189	6.12851e-12	AT4G38020
chr5	23640400	23643999	713	706	2.91822e-14	1.34186	5.88087e-12	AT5G58470
chr5	23640400	23643999	713	706	2.91822e-14	1.34186	5.88087e-12	AT5G58490
chr5	23640400	23643999	713	706	2.91822e-14	1.34186	5.88087e-12	AT5G58480
chr3	19210000	19210799	205	203	2.43031e-05	1.34177	0.000131802	AT3G51790
chr4	17254600	17255199	103	102	0.00178607	1.34171	0.00457587	AT4G36570
chr1	19992400	19993399	207	205	2.24915e-05	1.34165	0.000123259	AT1G53580
chr1	19902400	19903599	311	308	3.16441e-07	1.34162	3.64637e-06	AT1G53345
chr5	2061200	2061799	104	103	0.00171551	1.34158	0.00442965	AT5G06690
chr1	22022000	22022599	105	104	0.00164778	1.34146	0.00427718	AT1G59830
chr1	25344400	25345399	213	211	1.78305e-05	1.34128	0.000101283	AT1G67630
chr5	6703000	6703799	215	213	1.65033e-05	1.34116	9.54564e-05	AT5G19830
chr2	9739400	9740199	217	215	1.52753e-05	1.34104	8.95213e-05	AT2G22870
chr2	19208600	19209199	109	108	0.00140288	1.34099	0.00374425	AT2G46750
chr3	7422000	7422599	109	108	0.00140288	1.34099	0.00374425	AT3G21175
chr5	9534600	9535199	109	108	0.00140288	1.34099	0.00374425	AT5G27100
chr5	22910000	22910799	218	216	1.46961e-05	1.34099	8.67001e-05	AT5G56600
chr5	24707600	24708199	109	108	0.00140288	1.34099	0.00374425	AT5G61440
chr1	25556400	25556999	110	109	0.00134765	1.34087	0.00361807	AT1G68185
chr5	23473600	23474199	110	109	0.00134765	1.34087	0.00361807	AT5G57990
chr1	24440400	24440999	111	110	0.00129462	1.34076	0.00350248	AT1G65720
chr2	6612600	6613199	111	110	0.00129462	1.34076	0.00350248	AT2G15230
chr3	19810000	19811399	333	330	1.36896e-07	1.34076	1.85463e-06	AT3G53430
chr3	19810000	19811399	333	330	1.36896e-07	1.34076	1.85463e-06	AT3G53440
chr5	3088400	3088999	111	110	0.00129462	1.34076	0.00350248	AT5G09890
chr1	2174200	2174999	223	221	1.21147e-05	1.34071	7.39811e-05	AT1G07090
chr1	28679000	28679999	336	333	1.22129e-07	1.34065	1.69074e-06	AT1G76430
chr3	22799400	22799999	112	111	0.0012437	1.34065	0.00339059	AT3G61610
chr5	5297400	5297999	112	111	0.0012437	1.34065	0.00339059	AT5G16210
chr5	16295000	16295599	112	111	0.0012437	1.34065	0.00339059	AT5G40710
chr1	21542400	21543999	225	223	1.12144e-05	1.3406	6.94397e-05	AT1G58190
chr1	22770000	22770599	114	113	0.00114787	1.34044	0.00318068	AT1G61670
chr3	6889400	6890199	228	226	9.98826e-06	1.34044	6.31711e-05	AT3G19830
chr4	6415200	6415799	115	114	0.0011028	1.34034	0.00308106	AT4G10350
chr5	3789400	3789999	115	114	0.0011028	1.34034	0.00308106	AT5G11760
chr1	22814400	22815199	231	229	8.89672e-06	1.34029	5.76661e-05	AT1G61790
chr5	5696800	5697599	116	115	0.00105952	1.34024	0.00297891	AT5G17310
chr5	21286800	21287399	116	115	0.00105952	1.34024	0.00297891	AT5G52440
chr5	6570600	6572199	234	232	7.9249e-06	1.34014	5.23817e-05	AT5G19480
chr5	6570600	6572199	234	232	7.9249e-06	1.34014	5.23817e-05	AT5G19473
chr5	26848400	26849799	352	349	6.64702e-08	1.3401	1.02148e-06	AT5G67290
chr3	2510800	2511799	235	233	7.62524e-06	1.34009	5.07415e-05	AT3G07870
chr1	6414600	6415199	118	117	0.000978044	1.34004	0.00279369	AT1G18630
chr2	8145800	8146399	118	117	0.000978044	1.34004	0.00279369	AT2G18800
chr5	1323600	1324199	118	117	0.000978044	1.34004	0.00279369	AT5G04600
chr5	14484800	14485399	118	117	0.000978044	1.34004	0.00279369	AT5G36800
chr5	3453600	3454999	240	238	6.28913e-06	1.33985	4.355e-05	AT5G10940
chr5	16468400	16469399	243	241	5.60303e-06	1.33971	3.95558e-05	AT5G41140
chr5	2457600	2458399	245	243	5.18788e-06	1.33962	3.70676e-05	AT5G07730
[truncated: 1,158 more rows]

## Sheet: ET-induced H2A.Z eviction
Supplementary File 8: Genes with a robust eviction of H2A.Z in response to ET
Genes that show ET-induced H2A.Z eviction in Ler and Col-0
Gene
AT3G59900
AT2G05840
AT3G23150
AT1G18580
AT3G25730
AT1G10140
AT1G33140
AT1G25560
AT4G15550
AT1G49670
AT2G41230
AT2G41231
AT5G04510
AT4G10790
AT5G01210
AT5G01215
AT5G24690
AT3G10530
AT3G23980
AT4G06744
AT5G49700
AT5G45720
AT5G03740
AT2G27310
AT4G01000
AT1G70190
AT4G39160
AT5G14950
AT3G13120
AT1G76710
AT3G12780
AT5G15120
AT5G10010
AT3G08850
AT1G79150
AT5G03100
AT1G61970
AT2G16600
AT4G14720
AT5G63190
AT5G06570
AT2G39970
AT3G59040
AT1G62930
AT3G48070
AT3G03950
AT4G27310
AT2G18990
AT3G10030
AT3G32940
AT3G48990
AT3G27010
AT1G36050
AT1G22880
AT2G43420
AT1G31660
AT1G27000
AT4G14130
AT1G49760
AT2G18700
AT5G06360
AT1G54180
AT3G24870
AT5G63680
AT3G10040
AT1G30270
AT2G26070
AT5G54100
AT4G03260
AT2G17820
AT5G02530
AT5G49690
AT5G47010
AT3G14180
AT5G27390
AT5G27400
AT5G27410
AT2G17020
AT2G17030
AT4G16560
AT5G15860
AT5G23535
AT4G00230
AT4G00231
AT2G39980
AT5G43280
AT5G26820
AT5G14350
AT3G18060
AT3G05410
AT4G25870
AT1G26190
AT2G34690
AT4G26310
AT3G26950
AT1G25290
AT1G06870
AT4G12460
AT1G13410
AT1G32940
AT4G34960
AT5G19120
AT2G07360
AT2G29210
AT1G34130
AT3G06150
AT1G06900
AT1G06910
AT3G04340
AT3G49650
AT4G36650
AT5G19820
AT4G37580
AT1G54830
AT4G34530
AT4G34540
AT2G39670
AT3G56430
AT3G56440
AT1G33390
AT1G33400
AT3G27580
AT5G19750
AT5G07000
AT1G09530
AT3G12380
AT1G08520
AT2G20020
AT1G27600
AT1G80170
AT1G76510
AT3G12600
AT2G16720
AT1G80530
AT1G15130
AT4G25710
AT1G77890
AT2G45240
AT5G19780
AT5G46330
AT5G23680
AT5G23570
AT4G32300
AT4G32320
AT5G05550
AT5G05560
AT4G00650
AT5G03668
AT5G03670
AT5G41330
AT1G05270
AT3G07680
AT1G10450
AT4G23980
AT1G67350
AT1G03090
AT1G25570
AT3G26560
AT3G60200
AT3G05870
AT5G42540
AT5G15210
AT1G04850
AT2G39930
AT1G04310
AT2G46280
AT1G59720
AT1G79590
AT5G42220
AT4G38630
AT1G14470
AT4G10760
AT5G03340
AT1G09520
AT2G07050
AT5G09380
AT5G09390
AT1G59900
AT1G76010
AT1G06220
AT1G56210
AT2G42790
AT5G66540
AT2G17190
AT3G06600
AT3G06610
AT5G62290
AT5G27680
AT4G36930
AT3G54660
AT4G15810
AT4G15820
AT2G40590
AT2G40600
AT3G43920
AT4G38470
AT2G21950
AT2G21960
AT2G30150
AT4G30370
AT3G10850
AT3G10860
AT1G19520
AT1G47750
AT5G18680
AT1G63940
AT3G20630
AT5G03420
AT1G13180
AT3G45300
AT4G21450
AT1G14810
AT2G06010
AT4G02720
AT4G02725
AT3G18380
AT3G18390
AT1G09830
AT4G32970
AT2G38280
AT5G59500
AT1G53790
AT3G08636
AT3G08640
AT3G07770
AT1G53650
AT1G54920
AT3G05510
AT4G17420
AT1G79540
AT5G10110
AT5G04250
AT2G20390
AT5G17010
AT5G04440
AT1G77230
AT1G77235
AT4G30150
AT1G34340
AT5G19690
AT3G54670
AT4G00490
AT3G45230
AT5G44650
AT2G17350
AT2G17360
AT5G15170
AT5G15175
AT4G38890
AT1G76490
AT3G50880
AT1G28060
AT4G08940
AT1G15165
AT1G15170
AT1G33120
AT1G53230
AT1G53233
AT5G10780
AT1G15870
AT2G47090
AT2G47100
AT2G47110
AT2G47115
AT3G61360
AT3G61370
AT3G02450
AT3G02460
AT1G71100
AT5G03415
AT1G61150
AT1G55620
AT2G31600
AT2G31610
AT2G42955
AT4G24480
AT3G58750
AT5G16220
AT3G01480
AT1G14570
AT3G50650
AT1G69290
AT2G41220
AT4G25890
AT5G01720
AT1G48580
AT1G48570
AT1G70710
AT5G60160
AT2G18360
AT3G01160
AT3G01170
AT5G23530
AT2G25480
AT3G19490
AT3G50690
AT5G04060
AT5G04050
AT4G27440
AT1G50420
AT3G06410
AT3G59150
AT3G14010
AT1G80350
AT4G14430
AT5G48890
AT1G64650
AT5G15700
AT4G03635
AT1G06760
AT5G18470
AT5G47570
AT3G20898
AT3G20900
AT5G04238
AT5G04240
AT1G70000
AT4G31120
AT1G44820
AT4G12120
AT4G05440
AT4G05450
AT1G31230
AT4G39100
AT5G11490
AT5G11480
AT5G26980
AT3G49760
AT2G15440
AT1G17130
AT1G27430
AT3G61690
AT5G51300
AT4G35800
AT1G67100
AT2G34650
AT1G07210
AT1G79960
AT5G02370
AT3G02540
AT3G02550
AT5G46080
AT3G28030
AT5G18170
AT4G20330
AT4G20340
AT2G39480
AT4G34270
AT5G14770
AT4G28060
AT4G28068
AT4G28070
AT5G39760
AT2G27130
AT5G11330
AT5G11340
AT3G62310
AT5G48180
AT1G01760
AT1G01770
AT1G48900
AT4G01670
AT5G44210
AT1G54520
AT5G13510
AT3G18035
AT1G13030
AT1G13040
AT4G30930
AT4G30935
AT4G37740
AT1G47500
AT3G17910
AT4G26550
AT5G58003
AT1G12300
AT4G33060
AT5G04670
AT1G23090
AT4G10180
AT3G53340
AT3G15534
AT1G80770
AT5G08060
AT1G52320
AT1G79690
AT5G66360
AT5G44260
AT2G24120
AT1G22020
AT1G72640
AT1G72645
AT2G06000
AT2G35630
AT1G52360
AT1G24530
AT5G51340
AT4G29190
AT2G27200
AT2G37400
AT3G50330
AT1G51350
AT4G03030
AT5G67070
AT3G09440
AT4G00060
AT1G75630
AT3G17465
AT3G17470
AT2G40760
AT1G02870
AT1G80620
AT5G14270
AT3G53760
AT4G19440
AT3G10490
AT5G01410
AT3G07670
AT5G22750
AT3G26600
AT3G54380
AT5G53770
AT1G29900
AT1G79280
AT1G72480
AT5G46070
AT1G60080
AT2G13840
AT2G17830
AT3G10630
AT3G55250
AT5G08540
AT5G21930
AT5G21920
AT5G20910
AT4G39260
AT3G46100
AT2G22490
AT5G20020
AT1G14850
AT2G34830
AT3G11690
AT4G27450
AT2G36070
AT2G31650
AT3G54190
AT1G31240
AT5G48580
AT5G48590
AT5G10900
AT5G10920
AT5G10910
AT5G56180
AT4G21710
AT4G21720
AT4G35760
AT4G35770
AT1G13250
AT3G25410
AT5G35930
AT1G50120
AT1G48760
AT3G57890
AT5G57360
AT5G45610
AT1G63680
AT5G19550
AT5G67010
AT5G67020
AT1G50880
AT3G47910
AT1G05600
AT1G05590
AT3G62910
AT3G62920
AT1G79350
AT5G65640
AT1G53520
AT1G53530
AT1G20920
AT1G72420
AT1G78600
AT5G28150
AT2G45590
AT2G46740
AT5G34930
AT2G39350
AT5G28340
AT2G21090
AT2G36835
AT1G21600
AT1G21610
AT1G74240
AT3G43580
AT1G10320
AT1G10330
AT5G15010
AT5G14240
AT5G14250
AT5G16620
AT4G25840
AT4G26430
AT4G02550
AT4G02555
AT5G04520
AT3G02580
AT5G54800
AT3G20290
AT5G65000
AT2G21280
AT2G21290
AT3G03890
AT4G19865
AT2G17560
AT2G17570
AT5G57590
AT5G67060
AT3G44380
AT1G01910
AT1G01920
AT4G21210
AT1G43670
AT1G47240
AT3G10760
AT1G75680
AT2G18940
AT3G54950
AT3G14940
AT5G45290
AT5G49665
AT4G30972
AT4G30975
AT1G54780
AT2G36170
AT3G01130
AT1G73460
AT5G12440
AT4G12300
AT1G59840
AT4G01865
AT4G01870
AT4G01860
AT1G13160
AT5G12170
AT3G21200
AT5G14220
AT5G39890
AT1G80440
AT2G35260
AT5G20520
AT5G20080
AT1G68550
AT1G68552
AT2G17370
AT2G19810
AT1G62880
AT2G20530
AT3G61960
AT5G51660
AT1G04120
AT4G03150
AT4G03153
AT5G01270
AT5G35360
AT5G46740
AT1G27630
AT4G02790
AT2G27470
AT2G27480
AT5G23670
AT4G38350
AT4G38360
AT1G78800
AT3G23880
AT4G16280
AT3G52090
AT3G52100
AT5G01840
AT5G47190
AT4G28050
AT4G20850
AT3G18090
AT3G18100
AT1G30610
AT2G19180
AT1G07725
AT1G07728
AT1G69600
AT5G53850
AT5G53860
AT1G56570
AT3G57660
AT3G15470
AT4G27780
AT2G15860
AT1G01220
AT4G07410
AT4G22980
AT4G22970
AT2G30490
AT3G14240
AT4G05390
AT4G05400
AT3G02190
AT3G02200
AT3G20050
AT4G20010
AT1G05890
AT1G48970
AT1G26170
AT1G26180
AT3G50080
AT1G16340
AT1G16350
AT3G48890
AT1G06149
AT1G06150
AT4G39270
AT5G23610
AT3G24220
AT5G50480
AT2G34470
AT3G63200
AT1G60220
AT1G79950
AT2G38490
AT1G21650
AT1G21651
AT4G00620
AT4G27060
AT1G23280
AT1G23290
AT4G32120
AT1G60640
AT1G60650
AT5G02310
AT1G66890
AT4G25320
AT1G73770
AT5G63550
AT5G63540
AT1G02060
AT5G24318
AT1G01320
AT2G02970
AT2G02980
AT2G44410
AT5G16070
AT5G54520
AT4G37890
AT4G37895
AT1G49890
AT5G13920
AT3G27570
AT3G28720
AT1G11420
AT1G11430
AT5G04820
AT3G22425
AT3G22430
AT5G12150
AT1G62390
AT3G19100
AT3G60630
AT1G49980
AT5G54450
AT5G19310
AT1G71528
AT1G71530
AT3G52570
AT5G23040
AT5G42920
AT3G59380
AT3G59390
AT5G67330
AT1G62830
AT3G13670
AT2G18330
AT1G47310
AT5G14310
AT1G27435
AT2G19470
AT2G42710
AT4G23540
AT4G16130
AT5G17250
AT5G25070
AT5G25080
AT4G25730
AT1G79550
AT1G79560
AT3G46980
AT5G22090
AT1G27310
AT3G16300
AT3G16290
AT5G60490
AT1G08530
AT2G36000
AT5G19200
AT1G79500
AT5G12220
AT4G23740
AT3G13682
AT1G18415
AT1G18420
AT1G18430
AT1G18440
AT5G13260
AT4G22290
AT5G65850
AT5G65840
AT5G43080
AT1G33270
AT3G15150
AT3G15160
AT5G08415
AT5G08420
AT1G08700
AT1G08710
AT5G39350
AT5G62370
AT2G20060
AT1G11630
AT2G47760
AT2G47770
AT2G47780
AT5G58470
AT5G58490
AT5G58480
AT1G59830
AT5G57990
AT3G53430
AT3G53440
AT1G76430
AT5G11760
AT1G61790
AT5G67290
AT2G41300
AT3G51610
AT3G52860
AT5G65250
AT3G54850
AT2G03330
AT1G06780
AT4G20720
AT1G54130
AT3G52140
AT3G47940
AT2G41680
AT3G16020
AT5G36950
AT4G02740
AT1G16030
AT1G16040
AT5G06060
AT1G50260
AT1G50270
AT1G50280
AT1G52160
AT3G53520
AT1G15510
AT4G00500
AT4G00520
AT4G13750
AT1G63850
AT1G17760
AT5G13630
AT1G70200
AT3G06030
AT4G36390
AT4G36400
AT3G16810
AT3G02010
AT5G53350
AT5G53340
AT2G16880
AT2G16881
AT2G40360
AT1G06730
AT1G06720
AT4G09140
AT2G37310
AT2G37320
AT2G37330
AT5G48930
AT2G44760
AT1G05140
AT1G74850
AT5G17550
AT5G17560
AT1G08030
AT1G01990
AT5G44000
AT1G12840
AT1G12830
AT3G48980
AT4G09160
AT5G46370
AT3G04680
AT3G04690
AT2G35490
AT2G35500
AT3G02030
AT3G02040
AT3G02050
AT5G56040
AT5G61480
AT1G04930
AT1G04940
AT1G04945
AT1G21660
AT1G30880
AT1G56190
AT1G63130
AT1G72090
AT1G75590
AT1G76860
AT1G80290
AT2G01420
AT2G16370
AT2G25620
AT2G25900
AT2G27590
AT2G37035
AT2G44525
AT3G10985
AT3G14750
AT3G16320
AT3G19650
AT3G20810
AT3G48110
AT3G53950
AT3G57580
AT3G60510
AT4G00740
AT4G02330
AT4G02460
AT4G02465
AT4G30220
AT5G13310
AT5G18610
AT5G23290
AT5G37020
AT5G39980
AT5G40870
AT5G47830
AT5G58870
AT5G62280
AT5G65930
AT5G65940
AT5G58260
AT5G58270
AT1G08410
AT4G01310
AT4G01320
AT2G36230
AT2G36240
AT5G55560
AT5G05130
AT3G05030
AT5G05985
AT5G05987
AT5G05980
AT5G58960
AT2G40970
AT2G44065
AT5G04770
AT3G22300
AT3G22310
AT4G28230
AT4G28240
AT1G45332
AT3G56830
AT1G15810
AT4G04670
AT3G49668
AT3G49670
AT5G39610
AT3G19895
AT2G31750
AT2G23470
AT3G59980
AT2G32415
AT3G15450
AT5G10020
AT5G62690
AT4G01660
AT1G56180
AT4G22320
AT2G36080
AT5G05860
AT5G05870
AT5G05880
AT2G33320
AT5G65810
AT5G65820
AT5G65830
AT3G57340
AT1G53600
AT4G04350
AT2G45860
AT2G45870
AT5G18380
AT5G18390
AT5G14230
AT5G06180
AT5G26960
AT1G22030
AT3G51100
AT2G02560
AT1G20240
AT1G32415
AT1G07230
AT2G05765
AT4G24280
AT3G47800
AT1G48630
AT1G48635
AT1G06380
AT2G45320
AT2G45330
AT1G10150
AT1G18640
AT2G04930
AT5G48760
AT5G48770
AT1G64100
AT3G49725
AT1G05380
AT2G45050
AT3G11850
AT3G14990
AT3G15000
AT1G53200
AT5G52980
AT5G52990
AT1G29990
AT5G20170
AT5G20180
AT3G01140
AT3G01142
AT3G53560
AT3G05170
AT5G17600
AT4G18670
AT1G25145
AT1G18010
AT3G06060
AT2G22200
AT2G46310
AT4G14713
AT3G02700
AT3G02710
AT4G32420
AT4G32430
AT1G03750
AT4G35070
AT5G57370
AT3G58800
AT5G40770
AT5G18520
AT5G56910
AT5G56900
AT2G01710
AT2G01330
AT1G35670
AT3G49800
AT5G24490
AT5G20600
AT2G45060
AT2G26460
AT2G39280
AT2G39290
AT3G01910
AT3G01920
AT4G29750
AT3G10360
AT1G75420
AT1G77410
AT1G77420
AT1G28090
AT3G03210
AT5G11030
AT5G11040
AT5G58220
AT5G58230
AT2G46920
AT1G54310
AT3G47930
AT5G13680
AT5G13690
AT1G19490
AT1G55510
AT1G70350
AT1G70360
AT4G23620
AT1G21760
AT2G41380
AT4G29000
AT5G18525
AT5G18540
AT2G38070
AT1G71890
AT3G61678
AT3G61680
AT1G09040
AT1G20200
AT4G16720
AT5G24060
AT3G11910
AT1G05020
AT2G40950
AT1G60600
AT3G51780
AT5G14920
AT3G62830
AT1G09800
AT3G55605
AT1G60620
AT2G23350
AT5G07680
AT4G13780
AT1G31835
AT1G31840
AT1G56500
AT3G24150
AT3G24160
AT1G76920
AT3G06950
AT5G63100
AT1G07310
AT1G07320
AT5G52820
AT5G63620
AT4G34750
AT5G08760
AT5G08770
AT5G08780
AT4G28770
AT4G38280
AT2G22900
AT5G13520
AT5G13530
AT1G80500
AT5G03690
AT5G37130
AT5G15820
AT5G03290
AT4G01560
AT4G01570
AT5G48330
AT5G53620
AT4G04180
AT2G07690
AT1G27090
AT4G27320
AT2G05120
AT3G20170
AT4G33770
AT3G18930
AT3G13860
AT4G00810
AT1G53780
AT1G53785
AT5G26040
AT4G21140
AT4G21150
AT2G22650
AT2G22660
AT3G46790
AT3G46800
AT3G24290
AT1G02720
AT3G60530
AT5G03970
