# Supplementary material for: Epigenetic silencing of a multifunctional plant stress regulator
Source: eLife. 2019 Aug 16;8:e47835. doi: 10.7554/eLife.47835 (PMC6739875; doi:10.7554/eLife.47835)
Supplement: Supplementary file 9. — Table displays all used primer in this study. [file elife-47835-supp9.xlsx]

## Sheet: Primer list
Supplementary File 9: List of primers
Primers for Genotyping	Sequence
een-2 geno fwd	AAGAGGACACCGTATAAGAAAGAAGC
een-2 geno rev	CATCGGTGGATGCTGCTCTTTG
LBb1.3	ATTTTGCCGATTTCGGAAC
ino80-1 geno T5	TGGAGAAGGGGGATACATACG
ino80-1 geno T3	ACGTACAGCCCAAGGATCG
ino80-1 geno T-DNA	GATCAGATTGTCGTTTCCCGCC
ref6-1 geno LP	TCATATACAAGGCGTTCGGTC
ref6-1 geno RP	CAGTTGCAACTCTGGAGAAGG
arp5-1 geno RP	ACTCTAGCTCTTGCCTGGACG
arp5-1 geno LP	AGATCCTGTTCCATCCAAACCTT
LB3	TAGCATCTGAATTTCATAACCAATCTCGATACAC
pie1-1 geno LP	TTTTGTCTGCTTCCGACAGTGC
pie1-1 geno RP	TAATGAGCAATCATCAAGGCCTGAG
pie1-1 T-DNA	CATTTTATAATAACGCTGCGGACATCTAC
TAIL-PCR primers
TAIL1	GGGAGGTCGGGAGGAAGATC
TAIL2	TCAGCTTGAAGAATCTGCTTGAGG
TAIL3	CGACGCCACCACTATATCTG
AD1	NGTCGASWGANAWGAA
AD2	TGWGNAGSANCASAGA
AD3	AGWGNAGWANCAWAGG
AD4	STTGNTASTNCTNTGC
AD5	NTCGASTWTSGWGTT
AD6	WGTGNAGWANCANAGA
Primers for mutant characterization
EIN6 CDS KpnI fwd	CAGGTACCATGGCGGTTTCAGAGCAGAGTCAAG
EIN6 CDS FLAG SalI rev	CTAGTCGACTCATTTGTCGTCATCGTCTTTGTAGTCCCTTTTGTTGGTCTTCTTAA
EIN6 seq1	CTTGGTACGGTGTGCCAAAGG
EIN6 seq2	TAGCAAGCACGGAGAAGGAC
EIN6 seq3	TGAGGAAACGATTCAGGCAGC
EIN6 seq4	TCCAAGGAGCCAACAGACAAGAG
AQI fwd	ATGAGTCTTCTTCGTCTTCTCCTCG
AQI cDNA intr/exon fwd	CTAATTAAGATGTTAGCTGGGGCAG
EEN cDNA rev	CTACTTGAGAACAACAGCAGCATTGC
Actin2 fwd	GATATTCAGCCACTTGTCTGTG
Actin2 rev	CTTACACATGTACAACAAAGAAGG
Primers for cloning
EIN6 promoter fwd	CACCTAAAAACAGAGCTGGCTCTC
EIN6 rev w/o Stop	CCTTTTGTTGGTCTTCTTAACC
EEN promoter fwd	CACCGCCTTTTCTTAGTAACACGGAGACTG
EEN rev w/o Stop	CTTGAGAACAACAGCAGCATTGC
EEN CDS fwd	CACCATGGTGGTTTCTCCGGGGCTG
EEN rev with Stop	CTACTTGAGAACAACAGCAGCATTGC
EEN:GUS rev	GAGAACGACGACGACGAAGGCTTC
EIN2 promoter fwd	CACCAACTGCCCAAACAACATCAACGAG
EIN2 promoter rev	AAAAGAAGATCGAAAAATCAATTATATAAAATATTTA
EIN2_5'UTR intron rev	CCTAAATCTATCTGATAATATAATTACTCAGAGTAGG
EIN2 UI +1161 rev	CCTAAATCTATCTGATAATATAATTACTCAGAGTAGG
EIN2 UI +704 rev	CTGAATTTTTTTTTTATGGTGAAAATCTTCAGATACAGTAG
EIN2 UI +404 rev	TCCCGAAGAACTCCAAGTCTGG
EIN2 UI +170 rev	CTTCGAAATCGCCATGATCGCAAG
EIN2 -97 fwd	CACCCGAGCACCCATAACCTTCAGACC
ARP5 fwd	GGGGACAAGTTTGTACAAAAAAGCAGGCTCCATGGCGTTCGTTTCGAGGATACG
ARP5 rev	GGGGACCACTTTGTACAAGAAAGCTGGGTCTCACAAATAGTTGTATCGAATTTGATAATT
EIN6 ZNF fwd	CACCATGATTGGTAAGAAGAGAAGTGGTAATGCTTC
EIN6 ZNF rev	TCACCTTTTGTTGGTCTTCTTAACC
EIN6ΔZNF FLAG SalI rev	CTAGTCGACTCATTTGTCGTCATCGTCTTTGTAGTCGAGATGAGAAACCATTGGAG
