# Supplementary figures and images for: Epigenetic silencing of a multifunctional plant stress regulator
Source: eLife journal article supplement (doi:10.7554/elife.47835), 2019-08-16

Figure 1 - figure supplement 1

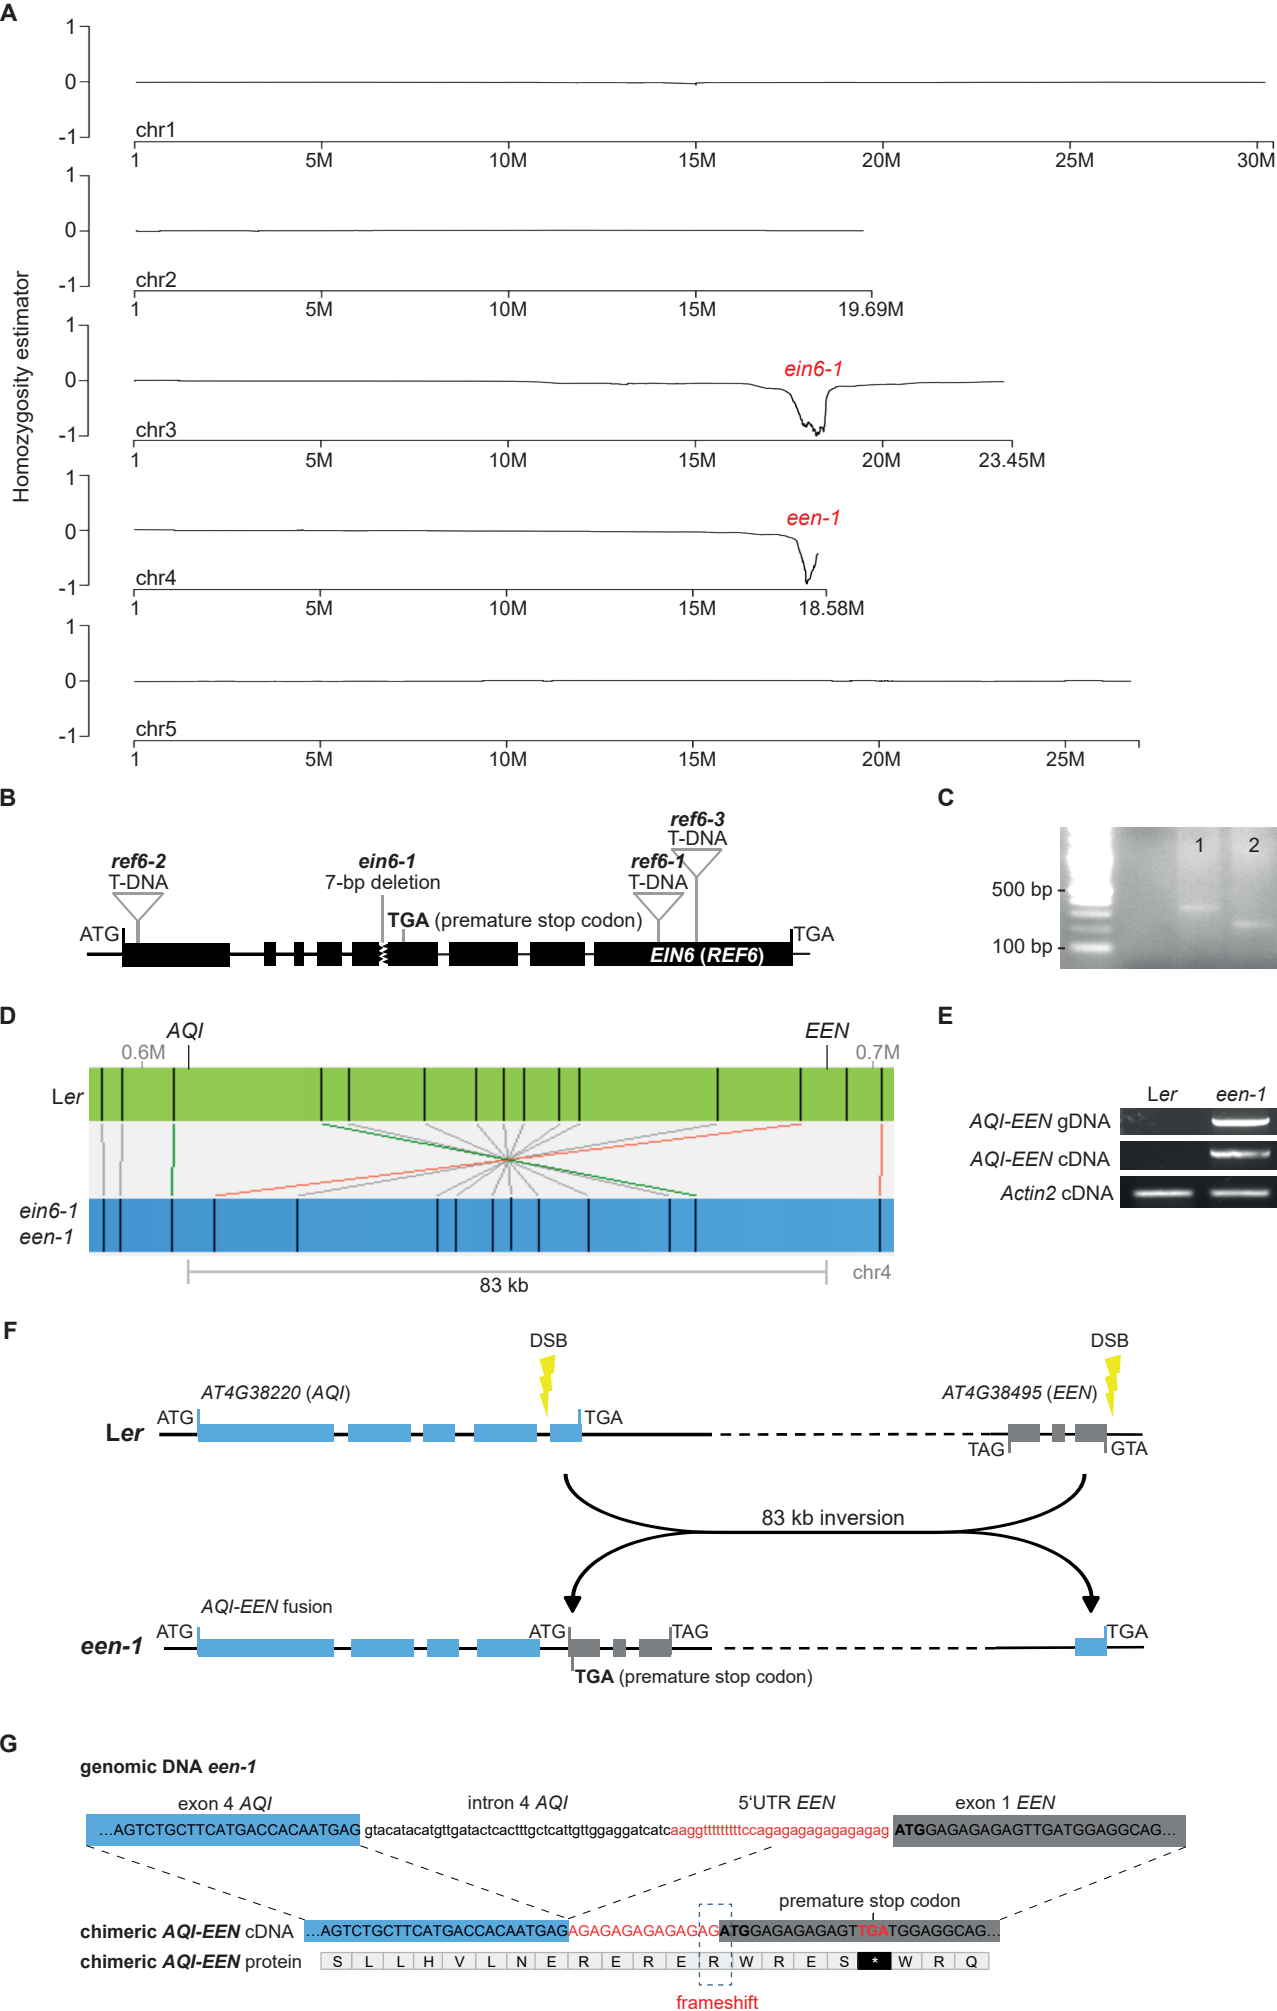

Supplement: supp [file elife-47835-supp-v1.zip]

**Figure 2 - figure supplement 1**

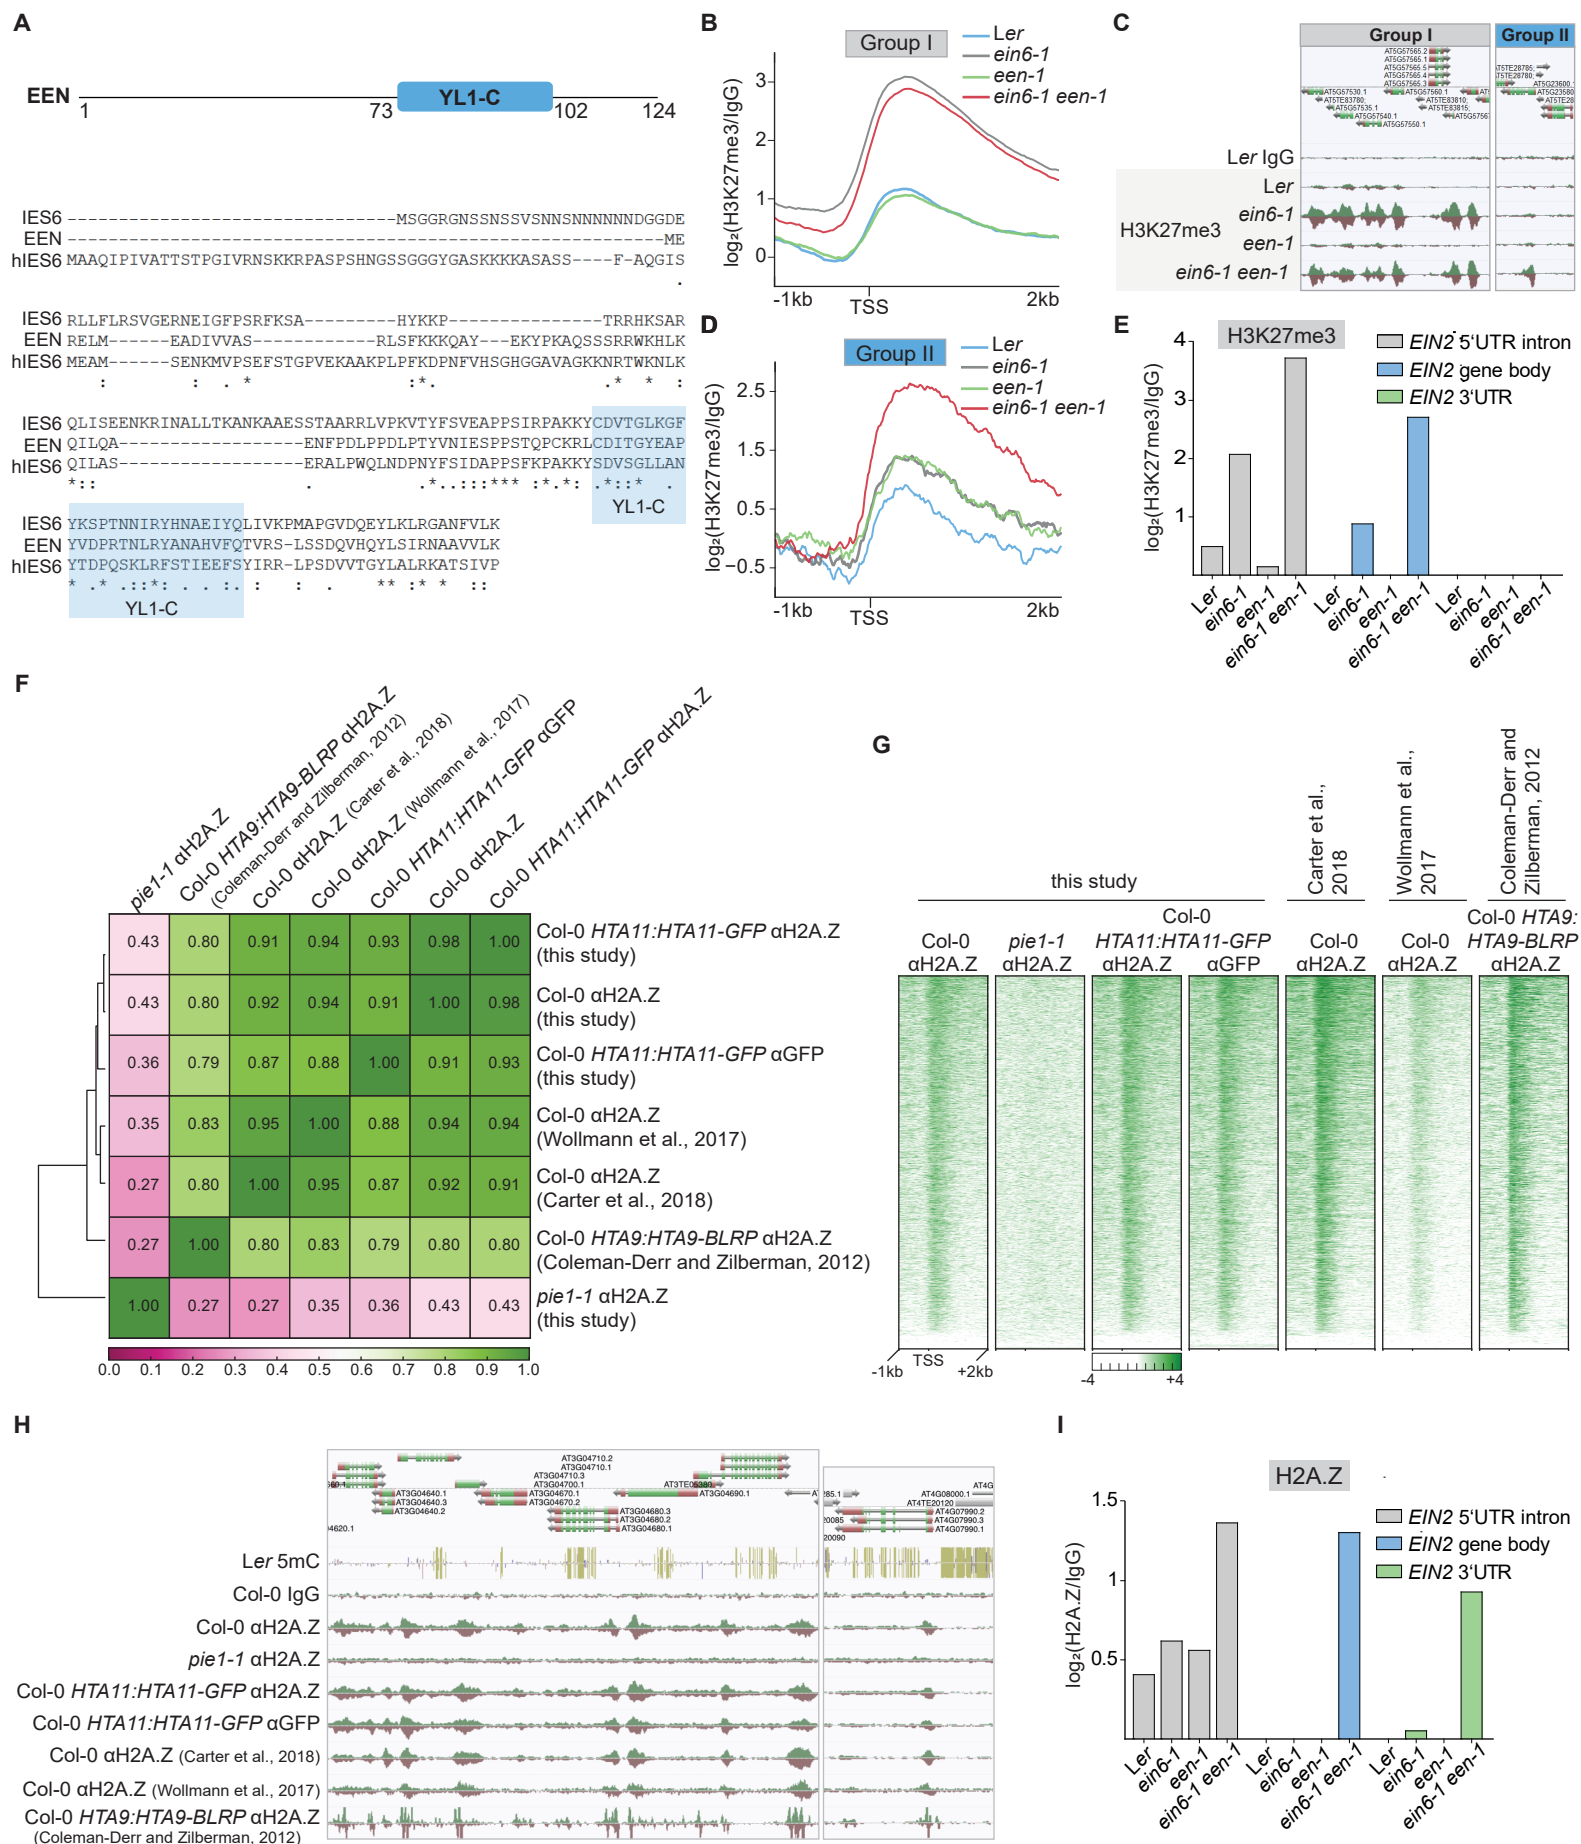

Supplement: supp [file elife-47835-supp-v1.zip]

Figure 2 - figure supplement 2

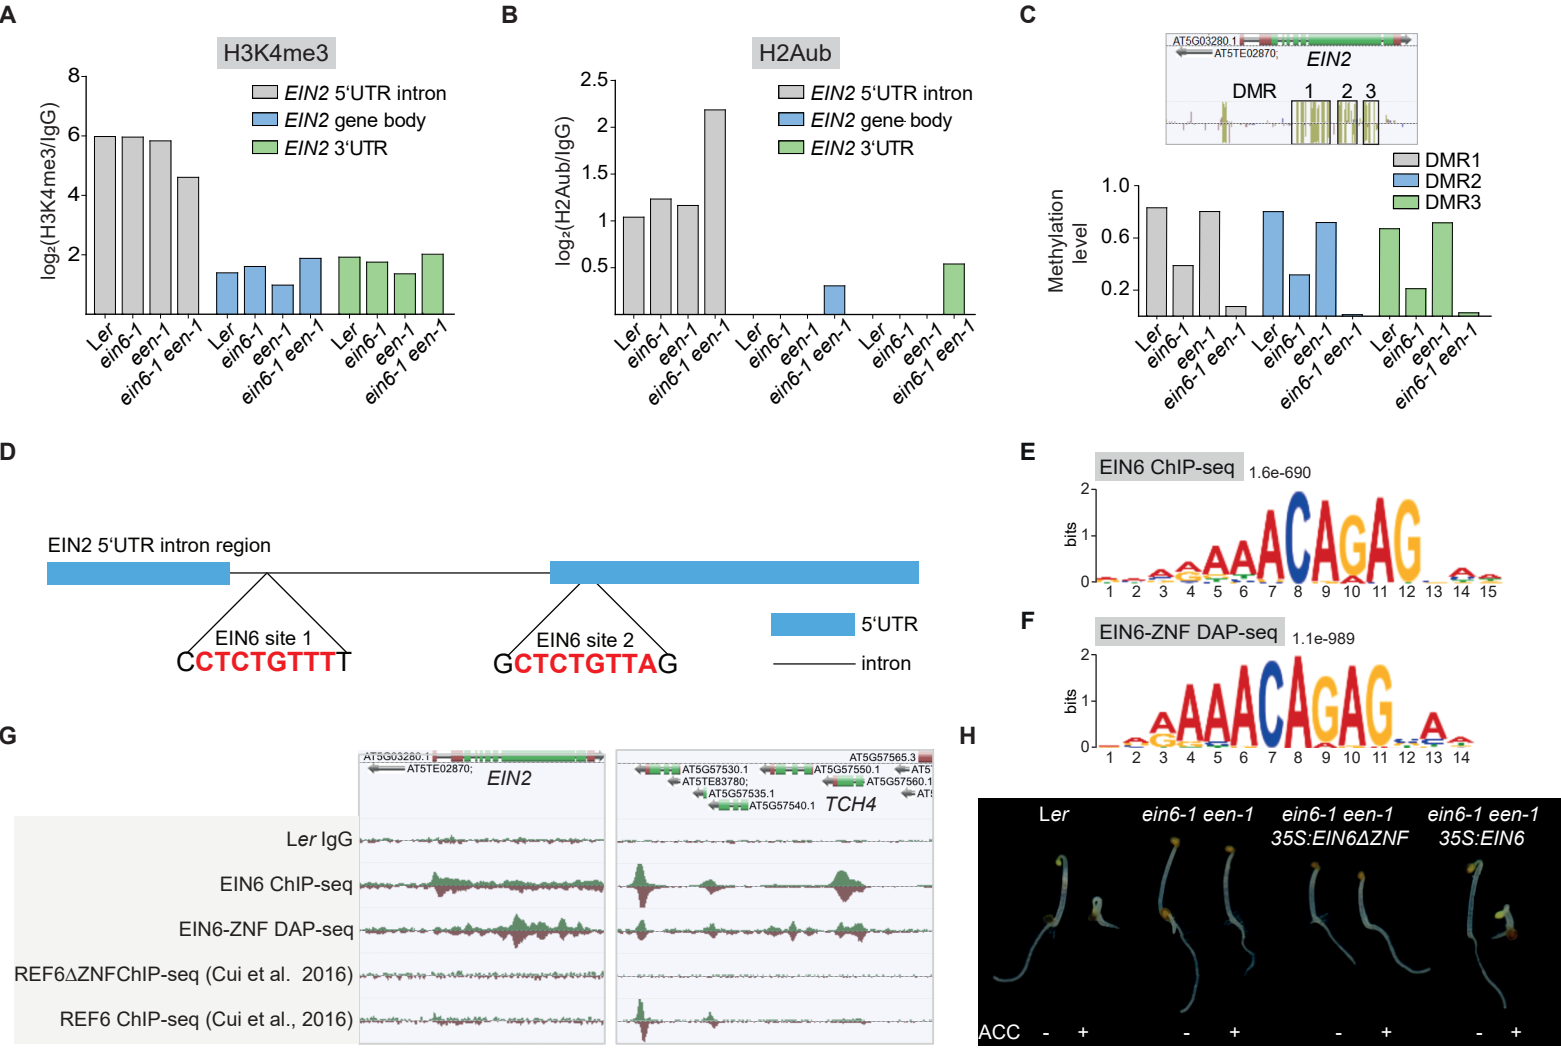

Supplement: supp [file elife-47835-supp-v1.zip]

Figure 4 - figure supplement 1

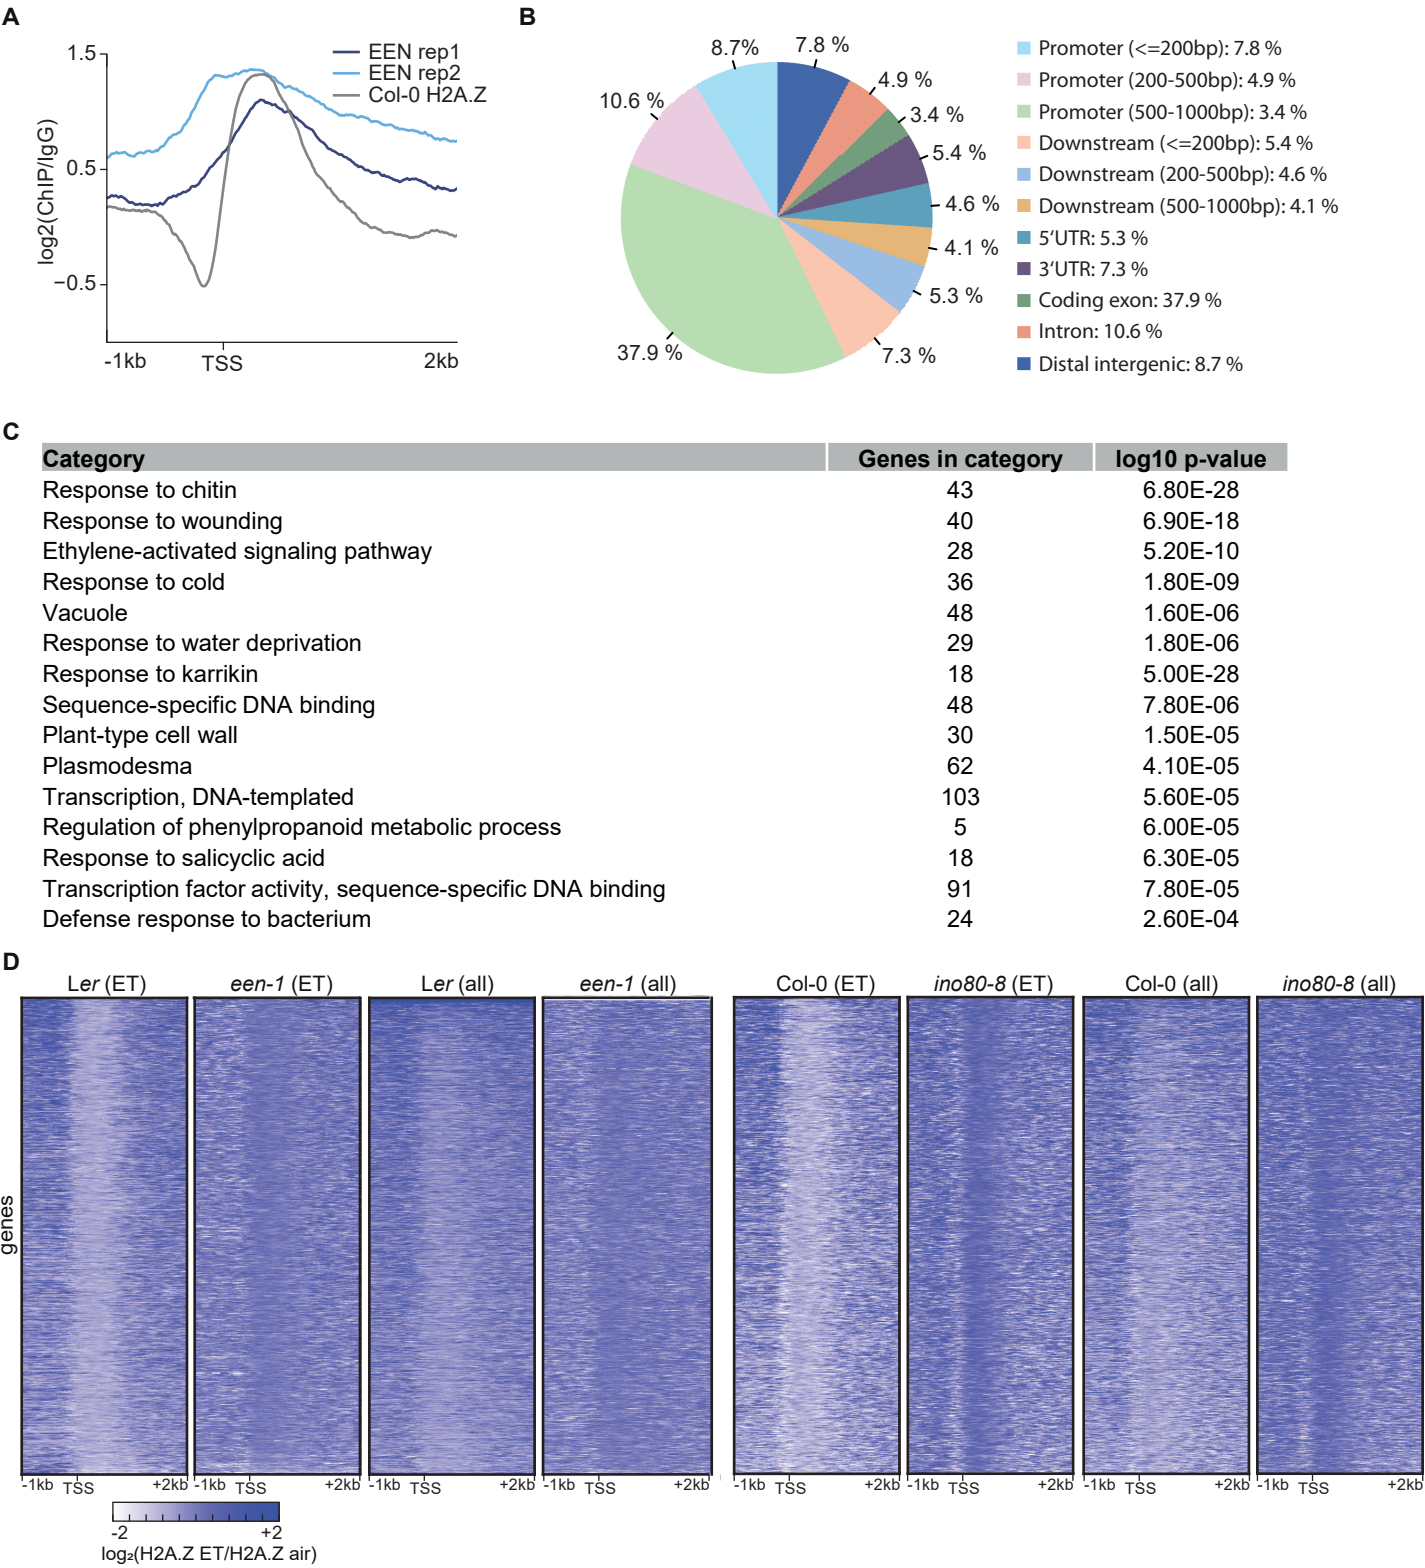

Supplement: supp [file elife-47835-supp-v1.zip]

Figure 5 - figure supplement 1

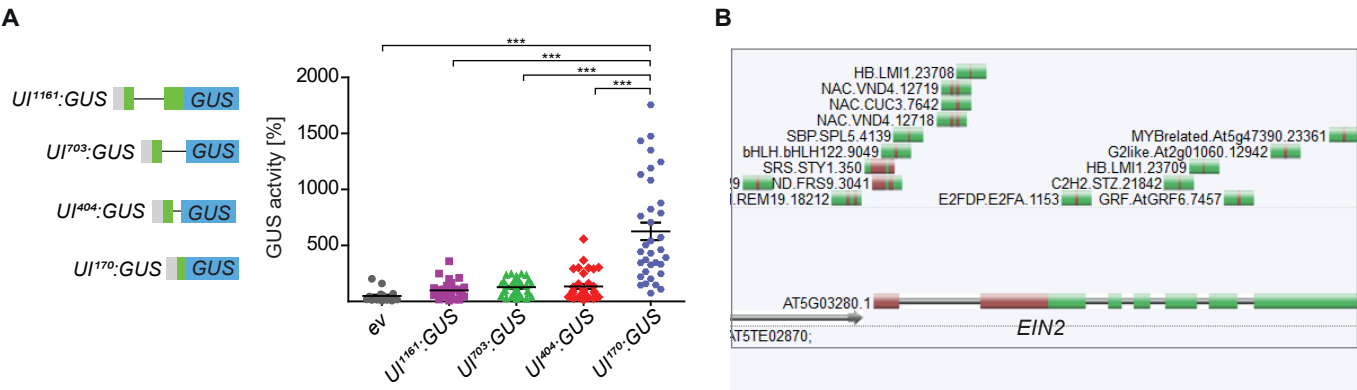

Supplement: supp [file elife-47835-supp-v1.zip]
